# Supplementary material for: Selective oxidation passing through η3-ozone intermediates: applications to direct propene epoxidation using molecular oxygen oxidant
Source: Royal Society of Chemistry journal article supplement (doi:10.1039/c4ra03729d), 2014-01-01
Supplement: c4ra03729d1.pdf [file c4ra03729d1.pdf]

*Electronic Supplementary Information*

**Selective Oxidation Passing through  $\eta^3$ -Ozone Intermediates: Applications to Direct Propene Epoxidation Using Molecular Oxygen Oxidant**

Thomas A. Manz\* and Bo Yang

Chemical Engineering Department, New Mexico State University, Las Cruces, NM 88003-8001.

\*corresponding author email: [tmanz@nmsu.edu](mailto:tmanz@nmsu.edu)

**CONTENTS:**

[1. Constrained Geometry Optimization Curves](#)

[2. NCCN Singlet Ground States](#)

[3. NCCN Triplet Ground States](#)

[4. NCCN Singlet Transition States](#)

[5. NCCNO Singlet Ground States](#)

[6. NCCNO Triplet Ground States](#)

[7. NCCNO Singlet Transition States](#)

[8. NCCNO Triplet Transition States](#)

[9. ONCCNO Singlet Ground States](#)

[10. ONCCNO Triplet Ground States](#)

[11. ONCCNO Singlet Transition States](#)

[12 ONCCNO Triplet Transition States](#)

[13. Ground State with Isopropyl Groups Replaced by H Atoms](#)

[14. Transition State with Isopropyl Groups Replaced by H Atoms](#)

[15. Molecules and Ligands](#)

[16. Calculations Using 6-311++G\\*\\* Basis Sets](#)

Energies are in Hartrees. DFT calculations performed with B3LYP functional. LANL2DZ basis sets were used for Sections 1 – 11. For Section 12, 6-311++G\*\* basis sets were used on all atoms except the SDD basis set (with relativistic effective core potential for 28 core electrons) was used on Zr. Enthalpy (H) and Gibbs Free Energy (G) were computed at 298.15 Kelvin and 1 atmosphere pressure.

## 1. Constrained Geometry Optimization Curves

This section contains constrained geometry optimization curves for situations that do not have a regular transition state. When O<sub>2</sub> adsorbs on the dioxo complexes, the energy barrier is defined by the singlet-triplet crossing point, because there is no regular transition state. This singlet-triplet crossing point was located by a series of constrained geometry optimizations. The relevant crossing point occurs where the triplet energy (T.E.) at the singlet optimized geometry (S.G.) equals the singlet energy (S.E.) at the singlet optimized geometry (S.G.).

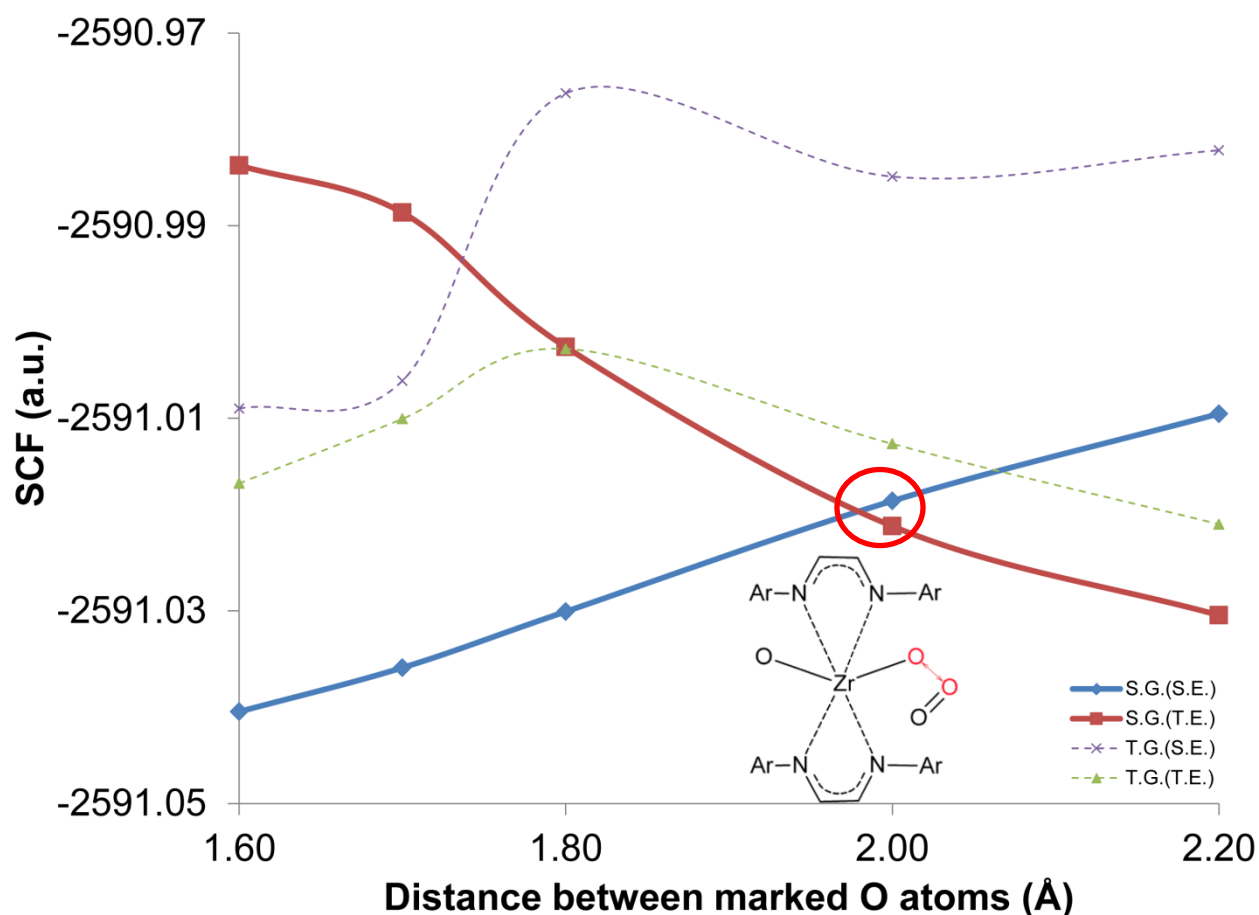

Fig. S1: O<sub>2</sub> adsorption to the Zr\_NCCN dioxo complex. Legend: S.G. = singlet geometry, S.E. = singlet energy, T.G. = triplet geometry, T.E. = triplet energy. The energy barrier was estimated near the singlet-triplet crossing point circled in red.

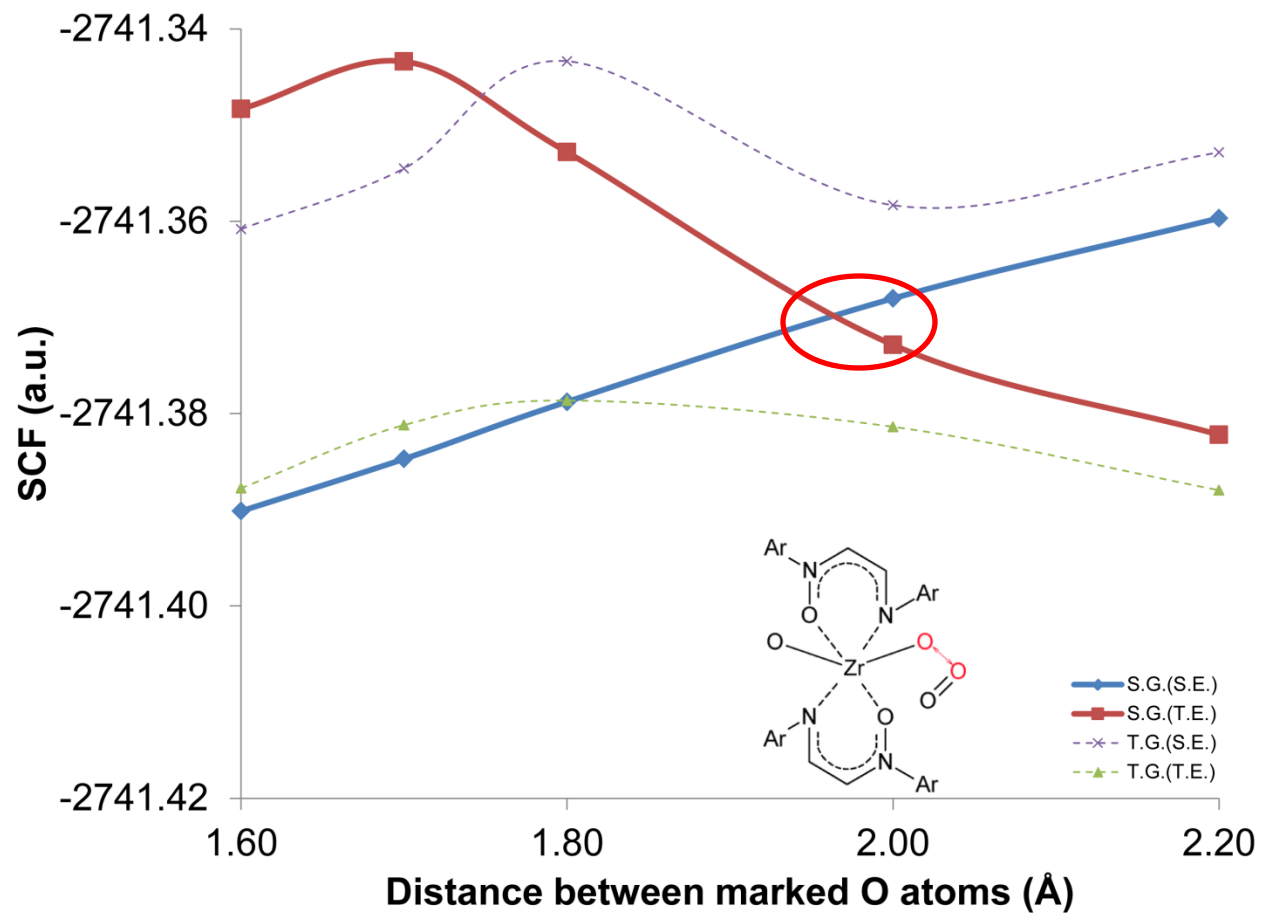

Fig. S2: O<sub>2</sub> adsorption to the Zr\_NCCNO dioxo complex. Legend: S.G. = singlet geometry, S.E. = singlet energy, T.G. = triplet geometry, T.E. = triplet energy. The energy barrier was estimated near the singlet-triplet crossing point circled in red.

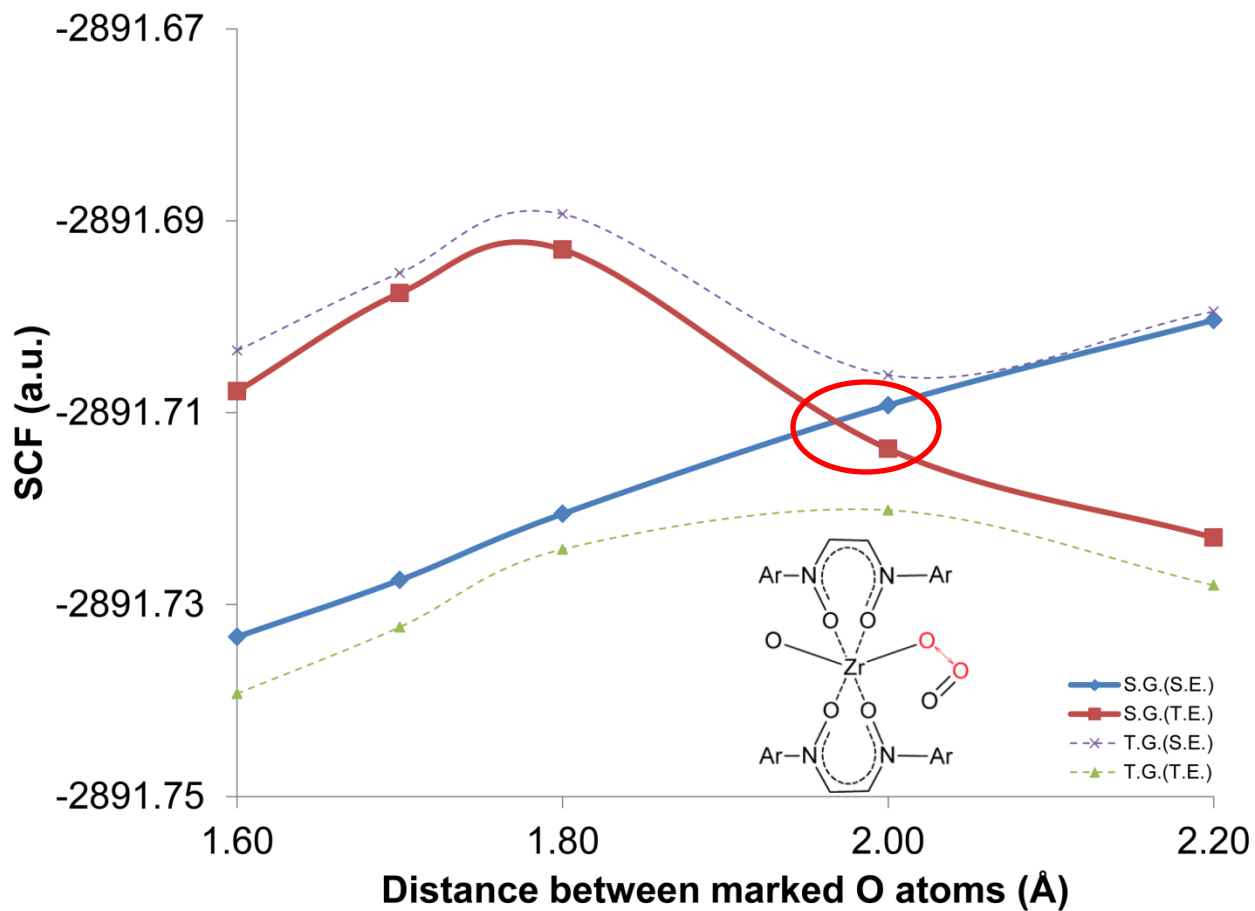

Fig. S3: O<sub>2</sub> adsorption to the Zr\_ONCCNO dioxo complex. Legend: S.G. = singlet geometry, S.E. = singlet energy, T.G. = triplet geometry, T.E. = triplet energy. The energy barrier was estimated near the singlet-triplet crossing point circled in red.



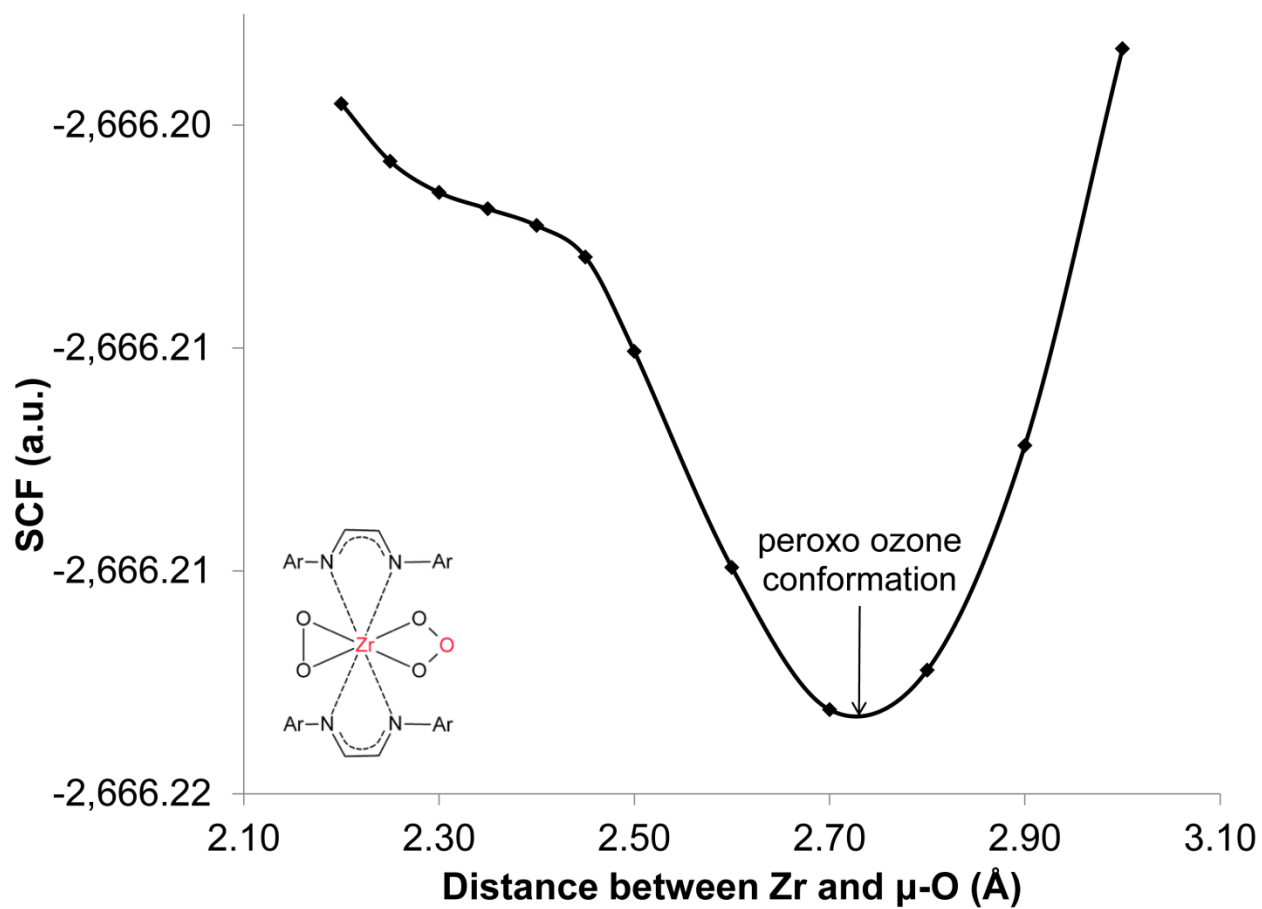

Fig. S4: Zr\_NCCN constrained geometry optimization that shows the peroxo  $\eta^3$ -ozone state does not exist. The single minimum corresponds to the peroxo  $\eta^2$ -ozone state.

## 2. NCCN Singlet Ground States

### 2.1 Structures with zero oxygen atoms

#### Bare Complex (puckered conformation)

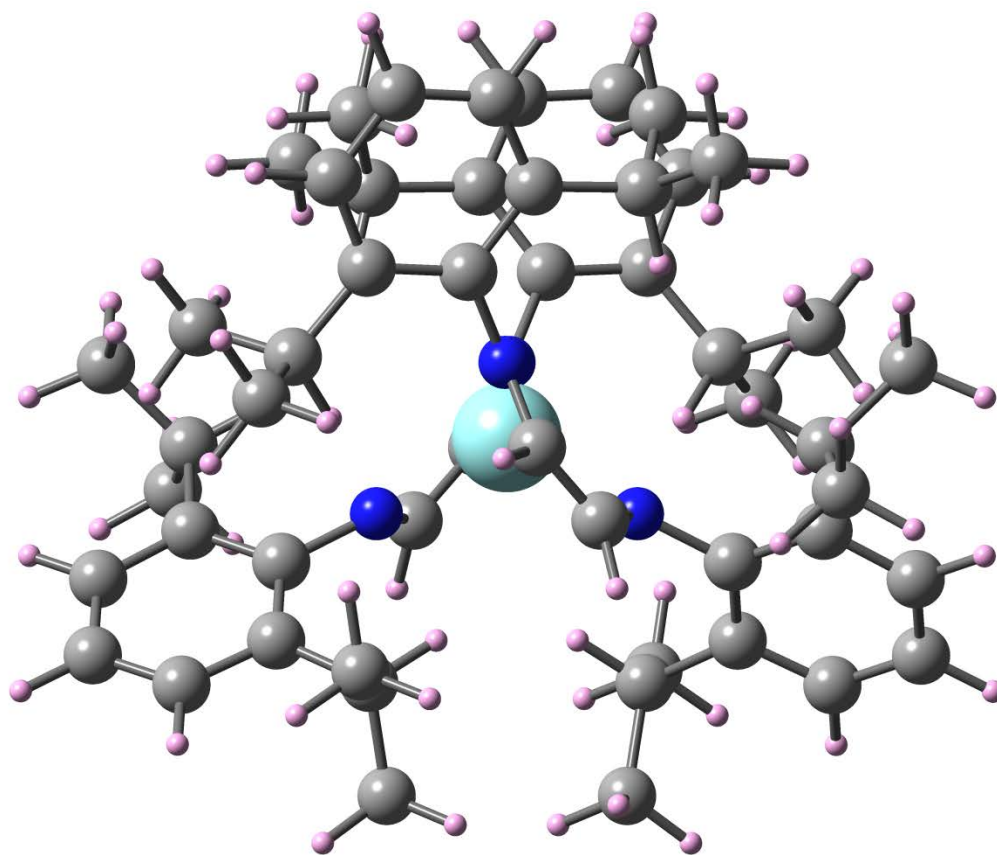

Fig. S5: NCCN Bare Complex (puckered conformation)

| SCF          | $E_{ZP}$     | H            | G            |
|--------------|--------------|--------------|--------------|
| -2290.280002 | -2289.146590 | -2289.082898 | -2289.245676 |

|    |             |             |             |
|----|-------------|-------------|-------------|
| Zr | -0.00078008 | -0.27548711 | 0.00036288  |
| N  | -1.72237594 | -1.28271076 | -0.73272856 |
| N  | 0.02816742  | 0.70993814  | -1.82794405 |
| N  | -0.02728034 | 0.71088120  | 1.82812529  |
| N  | 1.72175107  | -1.28298739 | 0.73102626  |
| C  | -1.23282540 | -1.37201041 | -2.07087655 |
| C  | -0.39397405 | -0.40989550 | -2.60721818 |
| C  | 0.39525190  | -0.40937671 | 2.60692924  |
| C  | 1.23301660  | -1.37183882 | 2.06961399  |
| C  | -2.97918846 | -1.91690462 | -0.41481778 |
| C  | -4.17687077 | -1.50310092 | -1.08547527 |
| C  | -5.39382776 | -2.14038253 | -0.76926160 |
| C  | -5.46577740 | -3.14542947 | 0.20534200  |

|   |             |             |             |
|---|-------------|-------------|-------------|
| C | -4.29599725 | -3.53498271 | 0.86853000  |
| C | -3.04535618 | -2.95036598 | 0.57157175  |
| C | -4.40968667 | -0.96314750 | -3.56385120 |
| C | -4.20188068 | -0.38594457 | -2.13711167 |
| C | -5.29049710 | 0.67706485  | -1.83470377 |
| C | 0.51333620  | 1.90340378  | -2.48275539 |
| C | 1.85331961  | 1.95845051  | -2.97062806 |
| C | 2.30115236  | 3.14665975  | -3.58565104 |
| C | 1.46139115  | 4.26225865  | -3.71344686 |
| C | 0.14695118  | 4.19748713  | -3.22909308 |
| C | -0.35271373 | 3.02722831  | -2.61938101 |
| C | -1.58829701 | -4.99857599 | 0.92867463  |
| C | -1.81856987 | -3.50912331 | 1.30002802  |
| C | -1.93375842 | -3.35795217 | 2.83906264  |
| C | -0.51171143 | 1.90431160  | 2.48353420  |
| C | 0.35387379  | 3.02880853  | 2.61737864  |
| C | -0.14541785 | 4.19935708  | 3.22687709  |
| C | -1.45889627 | 4.26362788  | 3.71386120  |
| C | -2.29808459 | 3.14723336  | 3.58898382  |
| C | -1.85072678 | 1.95879222  | 2.97408696  |
| C | 1.99089286  | 3.96993938  | 0.90955129  |
| C | 1.80027647  | 3.01284149  | 2.11628440  |
| C | 2.80061109  | 3.35814787  | 3.24963453  |
| C | 2.97800738  | -1.91848298 | 0.41340493  |
| C | 3.04311393  | -2.95237193 | -0.57260094 |
| C | 4.29304368  | -3.53885254 | -0.86891421 |
| C | 5.46310553  | -3.15068539 | -0.20543380 |
| C | 5.39218530  | -2.14512953 | 0.76873129  |
| C | 4.17604922  | -1.50596110 | 1.08427008  |
| C | -4.08056994 | 1.17375103  | 2.02434778  |
| C | -2.82696815 | 0.78508822  | 2.84970926  |
| C | -3.24097434 | 0.23737240  | 4.24085639  |
| C | 3.24719763  | 0.23707335  | -4.23341776 |
| C | 2.83018915  | 0.78553401  | -2.84346137 |
| C | 4.08188808  | 1.17601330  | -2.01617340 |
| C | 1.93103875  | -3.35659807 | -2.84032936 |
| C | 1.81572412  | -3.50942297 | -1.30141212 |
| C | 1.58409550  | -4.99912651 | -0.93193510 |
| C | 4.40495608  | -0.96636346 | 3.56304608  |
| C | 4.20212139  | -0.38866390 | 2.13574644  |
| C | 5.29464412  | 0.67116500  | 1.83619436  |
| C | -2.79854408 | 3.35676739  | -3.25531356 |
| C | -1.79992361 | 3.01090830  | -2.12069319 |
| C | -1.99233756 | 3.96749774  | -0.91374154 |
| H | -1.45082997 | -2.26973643 | -2.64747906 |
| H | 0.04581886  | -0.56169272 | -3.59096698 |
| H | -0.04383455 | -0.56105428 | 3.59095486  |
| H | 1.45120054  | -2.26948392 | 2.64628616  |
| H | -6.30125863 | -1.83480183 | -1.28417162 |
| H | -6.41664102 | -3.61705429 | 0.44144615  |
| H | -4.34756218 | -4.32029200 | 1.61910543  |
| H | -3.23412773 | 0.12208263  | -2.12249583 |

|   |             |             |             |
|---|-------------|-------------|-------------|
| H | -3.61898427 | -1.67643035 | -3.82469868 |
| H | -4.40221317 | -0.15702415 | -4.31004741 |
| H | -5.37271867 | -1.48616181 | -3.63834539 |
| H | -6.30155032 | 0.25511666  | -1.89953143 |
| H | -5.22935529 | 1.49404941  | -2.56487147 |
| H | -5.16747153 | 1.10112847  | -0.83114378 |
| H | 3.32077313  | 3.20009873  | -3.96037037 |
| H | 1.82743107  | 5.17180005  | -4.18398879 |
| H | -0.50191465 | 5.06424310  | -3.32989137 |
| H | -0.93395371 | -2.95169615 | 0.97471169  |
| H | -2.43143153 | -5.62136292 | 1.25407899  |
| H | -0.68067312 | -5.38122477 | 1.41380027  |
| H | -1.47778198 | -5.12472377 | -0.15486883 |
| H | -2.08565135 | -2.31235767 | 3.12858004  |
| H | -1.01964670 | -3.72044199 | 3.32850911  |
| H | -2.77635005 | -3.94102657 | 3.23313174  |
| H | 0.50297459  | 5.06676183  | 3.32525749  |
| H | -1.82478618 | 5.17341000  | 4.18407336  |
| H | -3.31693611 | 3.20033994  | 3.96584642  |
| H | 2.02396044  | 1.99785955  | 1.77249876  |
| H | 1.77699837  | 5.00987595  | 1.19086090  |
| H | 1.32804276  | 3.70538748  | 0.07671844  |
| H | 3.02601871  | 3.92624018  | 0.54465867  |
| H | 3.83089020  | 3.30686107  | 2.87491447  |
| H | 2.70397238  | 2.65970243  | 4.09075083  |
| H | 2.63957348  | 4.37312533  | 3.63580111  |
| H | 4.34372958  | -4.32450997 | -1.61919462 |
| H | 6.41344955  | -3.62362091 | -0.44098506 |
| H | 6.29986923  | -1.84069393 | 1.28386596  |
| H | -2.32686915 | -0.02578197 | 2.30936144  |
| H | -4.68108289 | 1.93280887  | 2.54284379  |
| H | -4.71443325 | 0.29397948  | 1.85591881  |
| H | -3.79417924 | 1.58135829  | 1.04711948  |
| H | -2.36661245 | -0.07898671 | 4.82483536  |
| H | -3.91100484 | -0.62529900 | 4.12833338  |
| H | -3.77078344 | 1.00078550  | 4.82557565  |
| H | 2.32968977  | -0.02521449 | -2.30333387 |
| H | 2.37414046  | -0.08028223 | -4.81878294 |
| H | 3.91757906  | -0.62506011 | -4.11901422 |
| H | 3.77762779  | 1.00044392  | -4.81765092 |
| H | 4.68274276  | 1.93504295  | -2.53428604 |
| H | 4.71615639  | 0.29693240  | -1.84569556 |
| H | 3.79335002  | 1.58436335  | -1.03985820 |
| H | 0.93171896  | -2.95149018 | -0.97530194 |
| H | 2.08290121  | -2.31074553 | -3.12881287 |
| H | 1.01707192  | -3.71874420 | -3.33031747 |
| H | 2.77382406  | -3.93918079 | -3.23472165 |
| H | 2.42612109  | -5.62244186 | -1.25917709 |
| H | 0.67554581  | -5.37999385 | -1.41675294 |
| H | 1.47450546  | -5.12678865 | 0.15152758  |
| H | 3.23597550  | 0.12238226  | 2.11878737  |
| H | 3.61186889  | -1.67761360 | 3.82217851  |

|   |             |             |             |
|---|-------------|-------------|-------------|
| H | 4.39788495  | -0.16018505 | 4.30917530  |
| H | 5.36650301  | -1.49184540 | 3.63970267  |
| H | 6.30430188  | 0.24637331  | 1.90373619  |
| H | 5.23380580  | 1.48825167  | 2.56630033  |
| H | 5.17545506  | 1.09562489  | 0.83237712  |
| H | -2.02407765 | 1.99580898  | -1.77751680 |
| H | -2.63759058 | 4.37236876  | -3.63993904 |
| H | -3.82945313 | 3.30436812  | -2.88253007 |
| H | -2.69998629 | 2.65947820  | -4.09715764 |
| H | -1.33091870 | 3.70234268  | -0.07998099 |
| H | -3.02810778 | 3.92383184  | -0.55071292 |
| H | -1.77767935 | 5.00749065  | -1.19421730 |

**Bare Complex (unpuckered conformation)**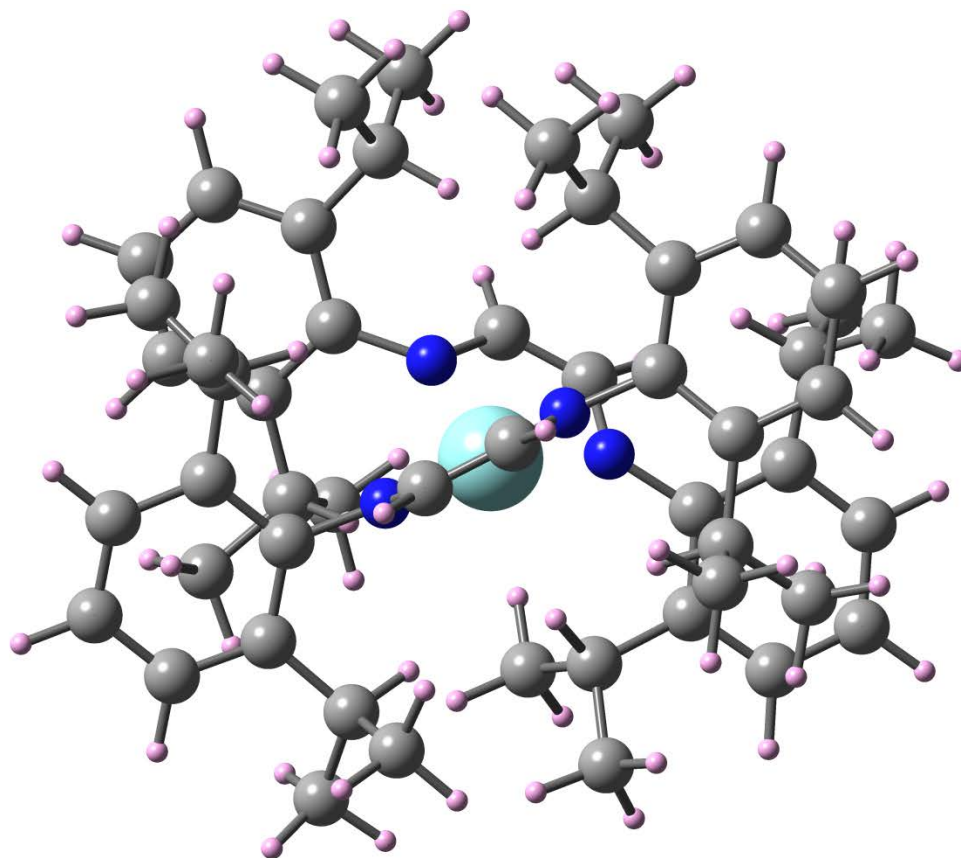

Fig. S6: NCCN Bare Complex (unpuckered conformation)

| SCF          | $E_{ZP}$     | H            | G            |
|--------------|--------------|--------------|--------------|
| -2290.248247 | -2289.115592 | -2289.052106 | -2289.212566 |

|    |             |             |             |
|----|-------------|-------------|-------------|
| Zr | -0.04653722 | -0.26796936 | -0.06762492 |
| N  | -0.85987632 | 1.07929780  | -1.47235864 |
| N  | 1.58579505  | -0.20951289 | -1.52898783 |
| N  | 0.97566845  | 0.35917977  | 1.67395281  |
| N  | -1.49628752 | -0.88307755 | 1.40463085  |
| C  | 0.11145547  | 1.45989771  | -2.44719426 |
| C  | 1.31285986  | 0.81675034  | -2.47523458 |
| C  | 0.25464159  | -0.06274716 | 2.84531867  |
| C  | -0.94888802 | -0.67822817 | 2.71485743  |
| C  | -2.20857913 | 1.54856055  | -1.74439347 |
| C  | -3.16734057 | 0.62944392  | -2.27074161 |
| C  | -4.45502587 | 1.10262211  | -2.59506736 |
| C  | -4.79654005 | 2.45404123  | -2.43104292 |
| C  | -3.84542842 | 3.35025584  | -1.92730800 |
| C  | -2.54911335 | 2.92097007  | -1.57011158 |
| C  | -3.96878587 | -1.81921239 | -2.44521510 |
| C  | -2.79795203 | -0.82221541 | -2.59952891 |

|   |             |             |             |
|---|-------------|-------------|-------------|
| C | -2.20456860 | -0.90181959 | -4.03367490 |
| C | 1.54330972  | -4.48221632 | -0.70816176 |
| C | 1.37929647  | -3.08929738 | -1.35748932 |
| C | 0.46934938  | -3.16804316 | -2.61081300 |
| C | 2.78810264  | -0.97130470 | -1.74530425 |
| C | 2.70567408  | -2.39733781 | -1.68195079 |
| C | 3.84013207  | -3.17670985 | -1.97486805 |
| C | 5.05965958  | -2.57714364 | -2.32476996 |
| C | 5.15490896  | -1.17992340 | -2.32651836 |
| C | 4.05235461  | -0.35377013 | -2.01771000 |
| C | -2.08912622 | 4.61532809  | 0.27393910  |
| C | -1.55907100 | 3.95349904  | -1.02433532 |
| C | -1.22835752 | 5.03610367  | -2.08646436 |
| C | 5.41623942  | 1.48407238  | -0.89643771 |
| C | 4.30820667  | 1.16043835  | -1.93279508 |
| C | 4.68362604  | 1.76673200  | -3.31203279 |
| C | 2.27470841  | 0.93150393  | 1.99464209  |
| C | 2.46563219  | 2.34275162  | 1.99207365  |
| C | 3.70709278  | 2.86389779  | 2.41763324  |
| C | 4.74166205  | 2.02425116  | 2.85039264  |
| C | 4.54790267  | 0.63551426  | 2.84692404  |
| C | 3.33050468  | 0.06479826  | 2.42076599  |
| C | 1.81374596  | 4.35943172  | 0.56697030  |
| C | 1.34966429  | 3.32050525  | 1.61905026  |
| C | 0.80246788  | 4.02450066  | 2.89063681  |
| C | -2.37655981 | -4.93586413 | -0.11855172 |
| C | -1.96180993 | -3.75014463 | 0.78480153  |
| C | -1.33920674 | -4.27753961 | 2.10807790  |
| C | -2.85273027 | -1.40535647 | 1.41164827  |
| C | -3.10505025 | -2.77541865 | 1.09096471  |
| C | -4.42975344 | -3.25659264 | 1.14075520  |
| C | -5.49489432 | -2.42358846 | 1.51399936  |
| C | -5.23887603 | -1.08746005 | 1.84654711  |
| C | -3.93240926 | -0.55394054 | 1.80293880  |
| C | 4.33498038  | -2.18169490 | 1.71604295  |
| C | 3.18660901  | -1.46195356 | 2.46848070  |
| C | 3.11138041  | -1.97807817 | 3.93178002  |
| C | -4.69934885 | 1.86456374  | 1.47663403  |
| C | -3.72980142 | 0.90877567  | 2.21607521  |
| C | -3.89282836 | 1.08179704  | 3.75177627  |
| H | -0.14438199 | 2.23544744  | -3.16170610 |
| H | 2.04118248  | 1.04301806  | -3.24404936 |
| H | 0.70961653  | 0.11380403  | 3.81424746  |
| H | -1.51361239 | -1.02294355 | 3.57559389  |
| H | -5.19597076 | 0.41461275  | -2.99057269 |
| H | -5.79263473 | 2.80128263  | -2.69473002 |
| H | -4.11223335 | 4.39745510  | -1.80515829 |
| H | -2.00434892 | -1.14637912 | -1.90477529 |
| H | 0.85069321  | -2.47808689 | -0.58556200 |
| H | -4.73711799 | -1.65848368 | -3.21242188 |
| H | -4.44080677 | -1.74392197 | -1.46003480 |
| H | -3.60152477 | -2.84616511 | -2.57165028 |

|   |             |             |             |
|---|-------------|-------------|-------------|
| H | -2.94628931 | -0.55824730 | -4.76697815 |
| H | -1.93097932 | -1.93519880 | -4.28507885 |
| H | -1.31239048 | -0.27323695 | -4.12946413 |
| H | 1.92675527  | -5.21153923 | -1.43229271 |
| H | 0.57549423  | -4.85340174 | -0.35666404 |
| H | 2.23245350  | -4.44932372 | 0.14386876  |
| H | 0.32414390  | -2.17966392 | -3.05735370 |
| H | -0.51185213 | -3.59751610 | -2.36695615 |
| H | 0.94251366  | -3.81184832 | -3.36337591 |
| H | 3.77749382  | -4.25983525 | -1.93767667 |
| H | 5.92400987  | -3.18995285 | -2.56756937 |
| H | 6.11185445  | -0.71568349 | -2.55309977 |
| H | -0.62878155 | 3.43430487  | -0.77716192 |
| H | 3.39768985  | 1.65313285  | -1.57978352 |
| H | -3.03380292 | 5.14593469  | 0.09779005  |
| H | -1.36429096 | 5.34646539  | 0.65522013  |
| H | -2.26416946 | 3.86629357  | 1.05556498  |
| H | -2.12197555 | 5.61355935  | -2.35831509 |
| H | -0.82892814 | 4.58797537  | -3.00495319 |
| H | -0.47955291 | 5.73962022  | -1.69837028 |
| H | 5.16599069  | 1.07942901  | 0.08905056  |
| H | 5.53043476  | 2.57190227  | -0.79590251 |
| H | 6.38833687  | 1.07328194  | -1.19993333 |
| H | 5.62243350  | 1.33750828  | -3.68686382 |
| H | 4.82266576  | 2.85291465  | -3.22742976 |
| H | 3.91326586  | 1.57974830  | -4.07125314 |
| H | 3.85678060  | 3.94076312  | 2.42835841  |
| H | 5.68651580  | 2.44496985  | 3.18641069  |
| H | 5.35223877  | -0.01500594 | 3.18155059  |
| H | 0.52618528  | 2.74379749  | 1.18507946  |
| H | -1.17325368 | -3.19237009 | 0.25971908  |
| H | 2.62675236  | 4.99003220  | 0.94963668  |
| H | 0.98536364  | 5.02451644  | 0.29347472  |
| H | 2.17060840  | 3.86467157  | -0.34540028 |
| H | 0.43029918  | 3.28915473  | 3.61495475  |
| H | -0.02324259 | 4.70079228  | 2.63417915  |
| H | 1.58670487  | 4.61556668  | 3.38247640  |
| H | -3.05441235 | -5.62257627 | 0.40381495  |
| H | -1.49472664 | -5.52069954 | -0.40938276 |
| H | -2.87839884 | -4.59539123 | -1.03290776 |
| H | -0.95752367 | -3.45408271 | 2.72114758  |
| H | -0.50843136 | -4.96676601 | 1.90330166  |
| H | -2.09492039 | -4.81882933 | 2.69277924  |
| H | -4.63442745 | -4.29405753 | 0.89546592  |
| H | -6.50883502 | -2.81495910 | 1.55111255  |
| H | -6.06408192 | -0.44558765 | 2.14417477  |
| H | 2.24423498  | -1.73060043 | 1.97654678  |
| H | -2.70647035 | 1.19887355  | 1.95428212  |
| H | 5.30273000  | -2.01647833 | 2.20756700  |
| H | 4.41778320  | -1.83751957 | 0.68040630  |
| H | 4.15639311  | -3.26602626 | 1.70310035  |
| H | 2.98100631  | -3.06892191 | 3.94649694  |



|   |             |             |            |
|---|-------------|-------------|------------|
| H | 2.27284180  | -1.52858874 | 4.47549012 |
| H | 4.03441273  | -1.74171990 | 4.47804021 |
| H | -4.62066787 | 1.75548738  | 0.39069580 |
| H | -4.46878217 | 2.90711081  | 1.73264335 |
| H | -5.74362207 | 1.68180449  | 1.76320733 |
| H | -3.18580950 | 0.45487339  | 4.30662390 |
| H | -4.90868954 | 0.81109416  | 4.07075752 |
| H | -3.71627953 | 2.12754088  | 4.03826706 |

## 2.2 Structures with one oxygen atom

### Oxo Complex

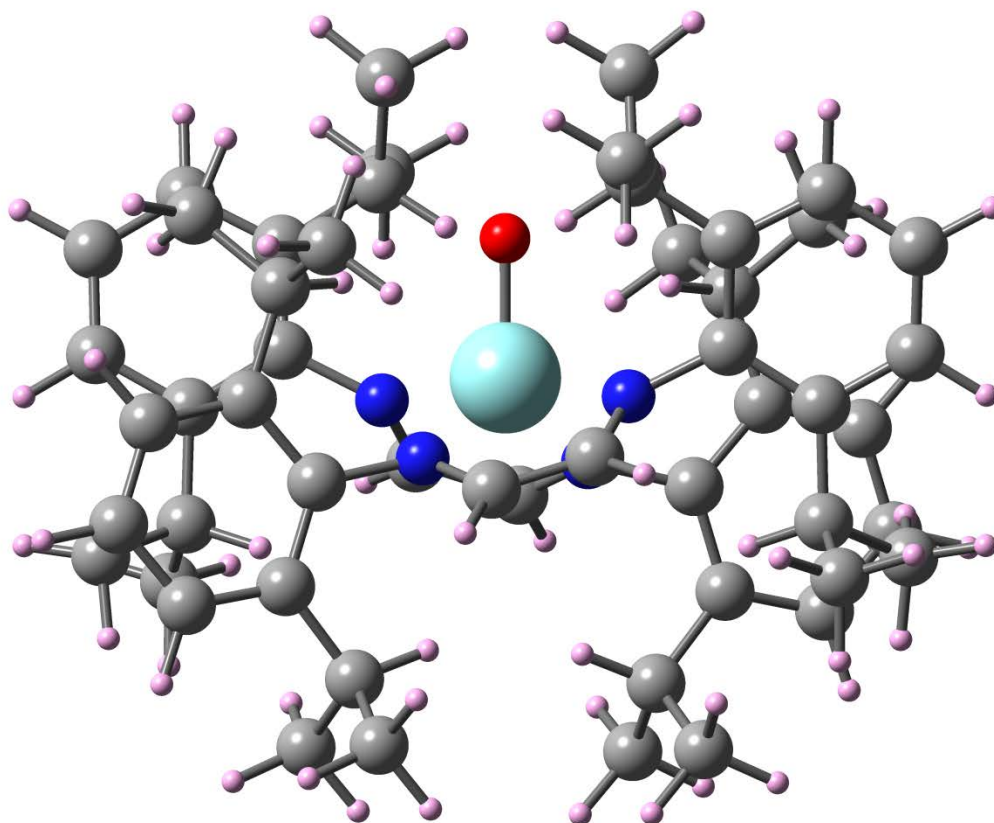

Fig. S7: NCCN Oxo Complex

| SCF          | E <sub>ZP</sub> | H            | G            |
|--------------|-----------------|--------------|--------------|
| -2365.516270 | -2364.379334    | -2364.314910 | -2364.477478 |

|   |             |             |             |
|---|-------------|-------------|-------------|
| O | -0.00454120 | 2.23222503  | -0.03247605 |
| N | -1.07609622 | -0.62799101 | 1.75965015  |
| N | 1.60388931  | 0.18059594  | 1.65446249  |
| N | 1.07469985  | -0.67668525 | -1.74413926 |
| N | -1.60577739 | 0.12886817  | -1.65069233 |
| C | -0.18035878 | -1.02633209 | 2.70477302  |
| C | 1.16293907  | -0.60448053 | 2.66518135  |
| C | 0.17610028  | -1.10348982 | -2.67472663 |
| C | -1.16742332 | -0.68342609 | -2.64158733 |
| C | -2.45690802 | -0.93436971 | 2.09555839  |
| C | -3.35879127 | 0.14278481  | 2.34150037  |
| C | -4.64193600 | -0.16169877 | 2.84056716  |
| C | -5.03339267 | -1.48607229 | 3.09273043  |
| C | -4.15181220 | -2.53661754 | 2.80217797  |
| C | -2.86031435 | -2.29110694 | 2.29136924  |

|   |             |             |             |
|---|-------------|-------------|-------------|
| C | -4.05623617 | 2.53481561  | 1.68539768  |
| C | -2.92555775 | 1.60354658  | 2.18095149  |
| C | -2.32612190 | 2.13355650  | 3.51272653  |
| C | 1.60677376  | 4.38024977  | 1.78155278  |
| C | 1.66454203  | 3.02704324  | 2.52921566  |
| C | 1.56430973  | 3.23597354  | 4.06630079  |
| C | 2.89727404  | 0.83025774  | 1.86197163  |
| C | 2.92499693  | 2.21744361  | 2.20257526  |
| C | 4.17944102  | 2.84225886  | 2.36879652  |
| C | 5.37770749  | 2.12804377  | 2.24000494  |
| C | 5.33330740  | 0.75267092  | 1.97522404  |
| C | 4.10865857  | 0.07495833  | 1.79359573  |
| C | -2.59465391 | -4.38307732 | 0.84911950  |
| C | -1.96332748 | -3.49295758 | 1.95269304  |
| C | -1.64378203 | -4.35267853 | 3.20481691  |
| C | 5.25060617  | -1.90746580 | 0.62787724  |
| C | 4.14185173  | -1.44777300 | 1.60467341  |
| C | 4.35053266  | -2.17008984 | 2.96759081  |
| C | 2.45474033  | -0.99139955 | -2.07298885 |
| C | 2.85819506  | -2.35202406 | -2.23921140 |
| C | 4.15386613  | -2.60897763 | -2.73389481 |
| C | 5.03822616  | -1.56557672 | -3.04030250 |
| C | 4.64507048  | -0.23569694 | -2.82075648 |
| C | 3.35927681  | 0.07992546  | -2.33613232 |
| C | 2.57911245  | -4.40973382 | -0.75398759 |
| C | 1.95893282  | -3.54794588 | -1.88571159 |
| C | 1.65763053  | -4.43425049 | -3.12388060 |
| C | -1.56650352 | 4.32223234  | -1.94150731 |
| C | -1.64801275 | 2.93991898  | -2.63206630 |
| C | -1.56358806 | 3.08603435  | -4.17745084 |
| C | -2.89507346 | 0.78122691  | -1.87630952 |
| C | -2.91270566 | 2.15679388  | -2.26132045 |
| C | -4.16258899 | 2.78864052  | -2.43516664 |
| C | -5.36632123 | 2.08999931  | -2.27564808 |
| C | -5.33241918 | 0.72233004  | -1.97247313 |
| C | -4.11245529 | 0.03926221  | -1.77864572 |
| C | 4.06434212  | 2.49095090  | -1.76278473 |
| C | 2.92552269  | 1.54362646  | -2.20571810 |
| C | 2.29288352  | 2.03849727  | -3.53569692 |
| C | -5.26586413 | -1.90200233 | -0.55665608 |
| C | -4.15585484 | -1.47700157 | -1.54748473 |
| C | -4.37027748 | -2.23568548 | -2.88960655 |
| H | -5.33541956 | 0.64723761  | 3.04974289  |
| H | -6.02067049 | -1.69619500 | 3.49679960  |
| H | -4.47170589 | -3.56252832 | 2.96998278  |
| H | -2.12776238 | 1.65827259  | 1.43186183  |
| H | 0.79027530  | 2.46118179  | 2.20694265  |
| H | -4.84054922 | 2.67149150  | 2.44227255  |
| H | -4.52094961 | 2.15154126  | 0.76961442  |
| H | -3.64107251 | 3.52587906  | 1.46276460  |
| H | -3.08566643 | 2.13117083  | 4.30649561  |
| H | -1.96546993 | 3.16228915  | 3.38370006  |

|   |             |             |             |
|---|-------------|-------------|-------------|
| H | -1.48273157 | 1.51690960  | 3.84648961  |
| H | 2.44556020  | 5.03841733  | 2.04665478  |
| H | 0.67705148  | 4.90658057  | 2.03585413  |
| H | 1.60532562  | 4.21352034  | 0.70008437  |
| H | 1.56860136  | 2.27687817  | 4.60170662  |
| H | 0.63358159  | 3.76220189  | 4.31763886  |
| H | 2.40497335  | 3.83397090  | 4.44376777  |
| H | 4.21217335  | 3.89825162  | 2.62344198  |
| H | 6.33349648  | 2.63042142  | 2.36925771  |
| H | 6.26276295  | 0.19410751  | 1.91201861  |
| H | -1.01368778 | -3.12085410 | 1.55378671  |
| H | 3.17703884  | -1.76508009 | 1.19096391  |
| H | -3.54423763 | -4.82272342 | 1.18074016  |
| H | -1.91524324 | -5.20819086 | 0.59542177  |
| H | -2.78890386 | -3.80708575 | -0.06297992 |
| H | -2.55770984 | -4.78506191 | 3.63211621  |
| H | -1.15863079 | -3.76246844 | 3.99249538  |
| H | -0.97372742 | -5.18152747 | 2.93959375  |
| H | 5.20130668  | -1.36741927 | -0.32028058 |
| H | 5.14549672  | -2.97881708 | 0.41618046  |
| H | 6.25017139  | -1.75840893 | 1.05722657  |
| H | 5.31670653  | -1.88495140 | 3.40451651  |
| H | 4.35145585  | -3.25962409 | 2.82577670  |
| H | 3.57314540  | -1.92383828 | 3.69967381  |
| H | 4.47451970  | -3.63860472 | -2.87569991 |
| H | 6.02883580  | -1.78479310 | -3.43115634 |
| H | 5.34054316  | 0.56817789  | -3.04238845 |
| H | 1.00227139  | -3.17077397 | -1.50923117 |
| H | -0.77574889 | 2.37822457  | -2.29670256 |
| H | 3.54170086  | -4.84028771 | -1.05851185 |
| H | 1.90717927  | -5.24025799 | -0.49750975 |
| H | 2.74691883  | -3.81411128 | 0.15099459  |
| H | 1.19504889  | -3.85703732 | -3.93451123 |
| H | 0.97414732  | -5.25027052 | -2.85384696 |
| H | 2.57567806  | -4.88471574 | -3.52269215 |
| H | -2.40213196 | 4.97840962  | -2.22140236 |
| H | -0.63568863 | 4.82762758  | -2.23160270 |
| H | -1.55022928 | 4.19970596  | -0.85426953 |
| H | -1.58441055 | 2.10682200  | -4.67487615 |
| H | -0.63068894 | 3.59233420  | -4.46001172 |
| H | -2.40242802 | 3.67789560  | -4.56851327 |
| H | -4.18781679 | 3.83711012  | -2.71972382 |
| H | -6.31844816 | 2.59756496  | -2.41147182 |
| H | -6.26664192 | 0.17473577  | -1.88762412 |
| H | 2.14556759  | 1.61651042  | -1.43936534 |
| H | -3.19206700 | -1.78849584 | -1.12718958 |
| H | 4.82898258  | 2.60895101  | -2.54245207 |
| H | 4.55226662  | 2.13338179  | -0.84855378 |
| H | 3.65139194  | 3.48647575  | -1.55688266 |
| H | 1.94265434  | 3.07304543  | -3.42578499 |
| H | 1.43599113  | 1.41985412  | -3.82854795 |
| H | 3.03038864  | 2.00871492  | -4.34948688 |

|    |             |             |             |
|----|-------------|-------------|-------------|
| H  | -5.21287250 | -1.33374072 | 0.37465880  |
| H  | -5.16612180 | -2.96687368 | -0.31254931 |
| H  | -6.26476546 | -1.76124520 | -0.99002925 |
| H  | -3.59127079 | -2.01550443 | -3.62816695 |
| H  | -5.33455308 | -1.95673164 | -3.33470379 |
| H  | -4.37858319 | -3.32073062 | -2.71693267 |
| H  | -0.52151068 | -1.59918339 | 3.56413774  |
| H  | 1.80720721  | -0.83569636 | 3.50967769  |
| H  | 0.51520019  | -1.69799521 | -3.52010733 |
| H  | -1.81418495 | -0.93839665 | -3.47731662 |
| Zr | 0.00001620  | 0.42190928  | -0.00626239 |

## 2.3 Structures with two oxygen atoms

### Peroxo Complex

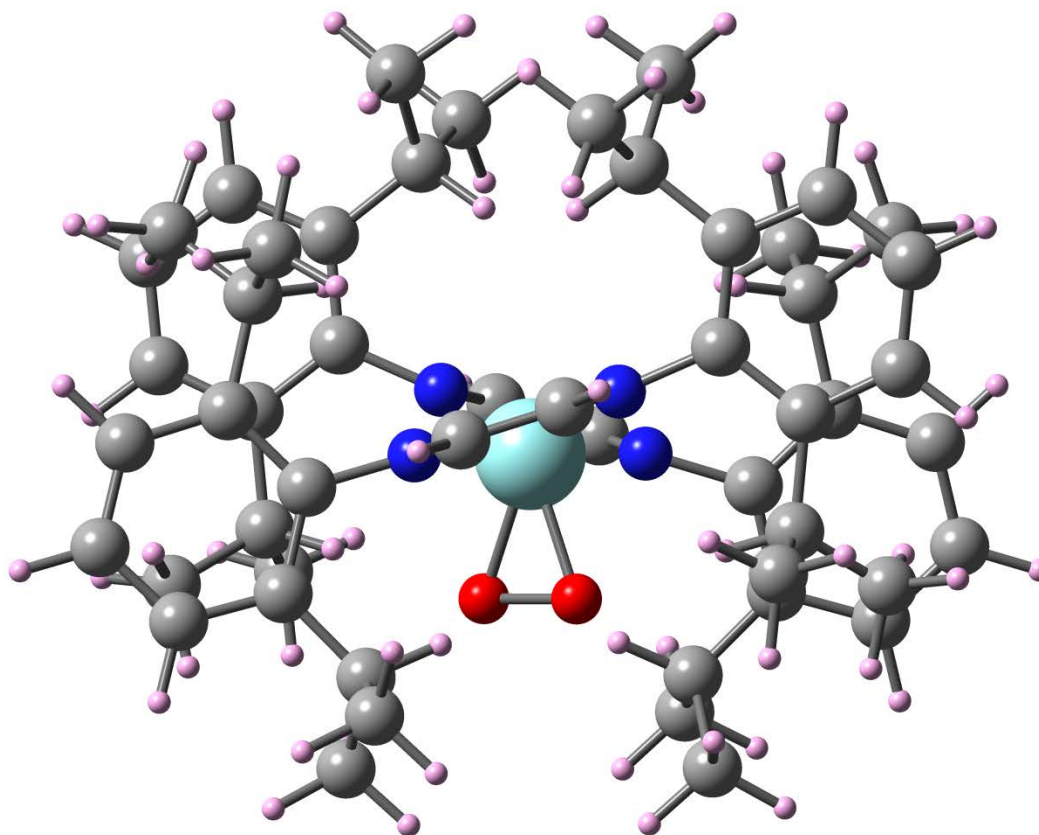

Fig. S8: NCCN Peroxo Complex

| SCF          | E <sub>ZP</sub> | H            | G            |
|--------------|-----------------|--------------|--------------|
| -2440.656571 | -2439.517461    | -2439.450805 | -2439.619454 |

|    |             |             |             |
|----|-------------|-------------|-------------|
| Zr | 0.00086511  | -0.39787451 | -0.00321126 |
| N  | 1.50082720  | -0.39062785 | -1.74621763 |
| N  | -1.15526639 | 0.43662187  | -1.84761596 |
| N  | -1.50073489 | -0.41387862 | 1.73850943  |
| N  | 1.15534350  | 0.41456447  | 1.85159137  |
| C  | 0.90183622  | -0.15962965 | -2.94017772 |
| C  | -0.44190222 | 0.26619449  | -2.98729574 |
| C  | -0.89788422 | -0.21099563 | 2.93546986  |
| C  | 0.44572743  | 0.21479724  | 2.98885648  |
| C  | 2.89892841  | -0.80724498 | -1.84960580 |
| C  | 3.92658643  | 0.18090043  | -1.83166774 |
| C  | 5.26244841  | -0.24233906 | -1.99426812 |
| C  | 5.57848803  | -1.59569294 | -2.18878710 |
| C  | 4.55269394  | -2.54905875 | -2.22986408 |
| C  | 3.19856672  | -2.18253024 | -2.06746148 |

|   |             |             |             |
|---|-------------|-------------|-------------|
| C | 4.70983618  | 2.48643232  | -0.99796890 |
| C | 3.61072269  | 1.67867138  | -1.72680349 |
| C | 3.37538422  | 2.29507418  | -3.13576540 |
| C | -1.74420098 | 4.53349502  | -0.94484900 |
| C | -1.41374621 | 3.37481121  | -1.91857482 |
| C | -0.88916022 | 3.93748024  | -3.26760136 |
| C | -2.47500632 | 1.01919766  | -2.06084654 |
| C | -2.60442383 | 2.43459234  | -2.14322890 |
| C | -3.85951910 | 2.97381013  | -2.49527160 |
| C | -4.95912782 | 2.14113481  | -2.74934820 |
| C | -4.81950974 | 0.74852811  | -2.64360779 |
| C | -3.58361720 | 0.15796936  | -2.30422115 |
| C | 2.36802546  | -4.46329205 | -1.25674591 |
| C | 2.11723545  | -3.26137128 | -2.20049691 |
| C | 2.00881915  | -3.73777402 | -3.67552397 |
| C | -4.65715862 | -2.08489961 | -1.65586499 |
| C | -3.44008887 | -1.36860104 | -2.28782843 |
| C | -3.19989614 | -1.91136759 | -3.72511042 |
| C | -2.90029658 | -0.82642894 | 1.83674581  |
| C | -3.20588789 | -2.20362787 | 2.03344064  |
| C | -4.56144186 | -2.56616126 | 2.19277408  |
| C | -5.58275473 | -1.60739143 | 2.16836983  |
| C | -5.26078016 | -0.25264944 | 1.99402984  |
| C | -3.92321523 | 0.16672654  | 1.83585606  |
| C | -2.38883505 | -4.47555860 | 1.18502488  |
| C | -2.12933877 | -3.28963508 | 2.14638906  |
| C | -2.01825923 | -3.78963740 | 3.61338182  |
| C | 1.76233057  | 4.52437505  | 0.98180281  |
| C | 1.41745679  | 3.34826091  | 1.92923373  |
| C | 0.86416235  | 3.88730690  | 3.27657012  |
| C | 2.47496239  | 0.99320677  | 2.07660853  |
| C | 2.60628080  | 2.40813433  | 2.16306020  |
| C | 3.85855445  | 2.94401521  | 2.52909333  |
| C | 4.95408371  | 2.10836606  | 2.79217428  |
| C | 4.81306181  | 0.71649075  | 2.68102330  |
| C | 3.57930604  | 0.12924529  | 2.32766292  |
| C | -4.69723193 | 2.49084819  | 1.04530545  |
| C | -3.59920119 | 1.66427805  | 1.75420748  |
| C | -3.35205352 | 2.25557148  | 3.17188181  |
| C | 4.64138454  | -2.10487609 | 1.63776743  |
| C | 3.43600052  | -1.39728373 | 2.30175216  |
| C | 3.22586010  | -1.95239862 | 3.73882561  |
| H | 1.45547498  | -0.29195148 | -3.86706570 |
| H | -0.89414643 | 0.49840318  | -3.94985500 |
| H | -1.44926059 | -0.36418400 | 3.86050031  |
| H | 0.90041511  | 0.42381753  | 3.95555808  |
| H | 6.06219609  | 0.49168154  | -1.97491188 |
| H | 6.61478615  | -1.90054860 | -2.31503497 |
| H | 4.80050358  | -3.59416316 | -2.39598658 |
| H | 2.67794095  | 1.78669597  | -1.15569392 |
| H | -0.59897569 | 2.79089202  | -1.47104341 |
| H | 5.62098652  | 2.56330464  | -1.60621739 |

|   |             |             |             |
|---|-------------|-------------|-------------|
| H | 4.97286239  | 2.03691988  | -0.03622716 |
| H | 4.36039152  | 3.50955353  | -0.80956909 |
| H | 4.27038748  | 2.17100072  | -3.75999534 |
| H | 3.16598591  | 3.37064156  | -3.05212712 |
| H | 2.53281463  | 1.82561145  | -3.65453598 |
| H | -2.53002512 | 5.18759548  | -1.34336118 |
| H | -0.85319280 | 5.15290995  | -0.78130850 |
| H | -2.08345948 | 4.15446262  | 0.02727325  |
| H | -0.59184116 | 3.12990705  | -3.94757246 |
| H | -0.01680180 | 4.58452782  | -3.10426525 |
| H | -1.66445853 | 4.53105513  | -3.76983176 |
| H | -3.97656727 | 4.05176716  | -2.57501189 |
| H | -5.91791740 | 2.57322547  | -3.02605403 |
| H | -5.67682694 | 0.11049366  | -2.83825978 |
| H | 1.15299706  | -2.83909647 | -1.91218502 |
| H | -2.55934968 | -1.62726087 | -1.69006674 |
| H | 3.30958618  | -4.98251779 | -1.48410771 |
| H | 1.55100361  | -5.18967470 | -1.35881524 |
| H | 2.38562750  | -4.12868371 | -0.21467213 |
| H | 2.94275016  | -4.20588583 | -4.01623448 |
| H | 1.78666920  | -2.90280223 | -4.35370349 |
| H | 1.20339553  | -4.47776079 | -3.77347223 |
| H | -4.88977048 | -1.68647162 | -0.66324588 |
| H | -4.43779105 | -3.15464513 | -1.54699983 |
| H | -5.55474702 | -1.99733166 | -2.28349039 |
| H | -4.04791669 | -1.66904772 | -4.38064091 |
| H | -3.08679935 | -3.00301753 | -3.69986431 |
| H | -2.29163934 | -1.49194862 | -4.17386722 |
| H | -4.81397490 | -3.61252673 | 2.34319479  |
| H | -6.62023144 | -1.90932617 | 2.29196026  |
| H | -6.05713313 | 0.48526402  | 1.98756614  |
| H | -1.16405631 | -2.86759912 | 1.86142158  |
| H | 0.61417996  | 2.76803368  | 1.45623625  |
| H | -3.33213209 | -4.99390643 | 1.40714301  |
| H | -1.57489182 | -5.20714690 | 1.27327158  |
| H | -2.40805501 | -4.12505759 | 0.14820861  |
| H | -1.78676671 | -2.96701988 | 4.30345342  |
| H | -1.21788846 | -4.53693307 | 3.69613694  |
| H | -2.95415427 | -4.25607456 | 3.95092940  |
| H | 2.53239520  | 5.17816010  | 1.41031380  |
| H | 0.87063083  | 5.13939856  | 0.80629883  |
| H | 2.12848385  | 4.16389412  | 0.01241598  |
| H | 0.55521080  | 3.06825524  | 3.93730428  |
| H | -0.00622782 | 4.53530076  | 3.10638466  |
| H | 1.62833042  | 4.47407695  | 3.80337097  |
| H | 3.97719732  | 4.02142119  | 2.61290536  |
| H | 5.91078049  | 2.53797809  | 3.07976830  |
| H | 5.66722094  | 0.07600880  | 2.88208668  |
| H | -2.66881532 | 1.77601326  | 1.17981253  |
| H | 2.54424095  | -1.65201542 | 1.71902471  |
| H | -5.60493826 | 2.56179987  | 1.65937749  |
| H | -4.96715372 | 2.05997357  | 0.07697153  |



|   |             |             |             |
|---|-------------|-------------|-------------|
| H | -4.34317975 | 3.51533767  | 0.87368095  |
| H | -3.13687590 | 3.33114617  | 3.10481195  |
| H | -2.50902465 | 1.77288604  | 3.67763591  |
| H | -4.24403888 | 2.12628104  | 3.79939046  |
| H | 4.84702487  | -1.70123287 | 0.64138442  |
| H | 4.42565577  | -3.17555029 | 1.53025830  |
| H | 5.55375291  | -2.01353545 | 2.24310512  |
| H | 2.32810988  | -1.53506135 | 4.21053818  |
| H | 4.08763884  | -1.71699433 | 4.37867857  |
| H | 3.11063082  | -3.04366520 | 3.70684283  |
| O | 0.60424173  | -2.27439207 | 0.48027692  |
| O | -0.59902356 | -2.27106440 | -0.50858608 |

**Dioxo Complex (conformation 1 lower energy)**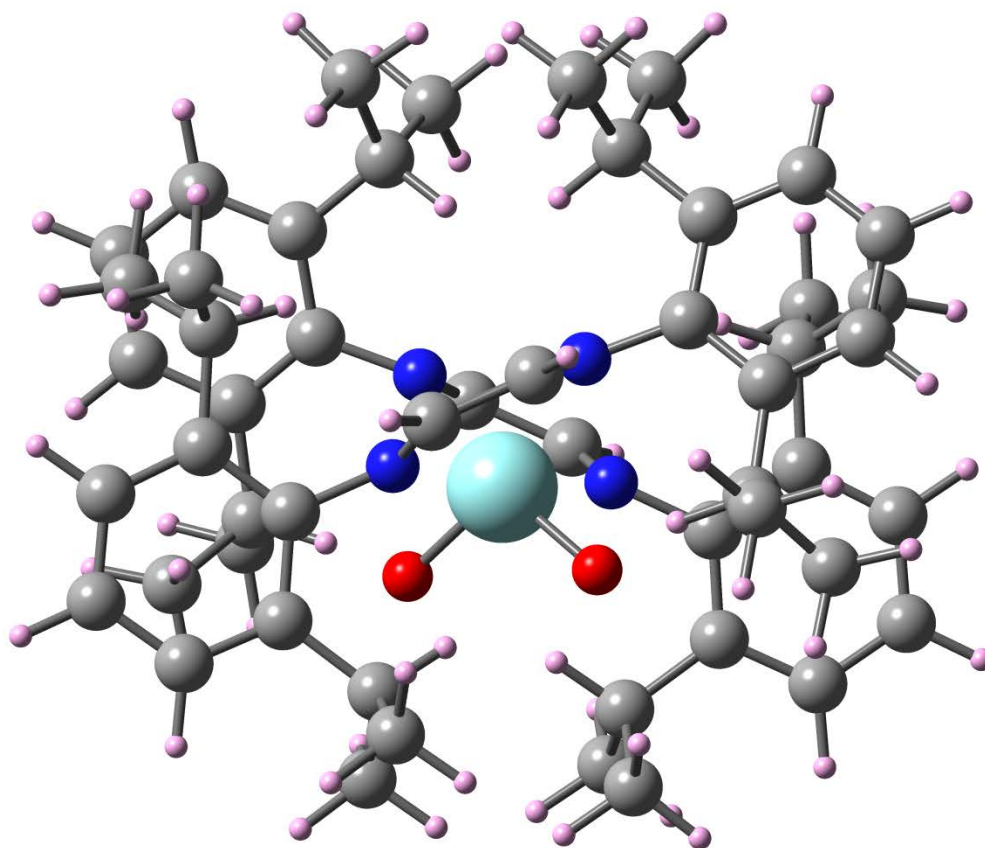

Fig. S9: NCCN Dioxo Complex (conformation 1 lower energy)

| SCF          | $E_{ZP}$     | H            | G            |
|--------------|--------------|--------------|--------------|
| -2440.716550 | -2439.577285 | -2439.509610 | -2439.681936 |

|    |             |             |             |
|----|-------------|-------------|-------------|
| Zr | 0.00191600  | -0.68426200 | 0.03332400  |
| N  | 1.42110600  | -0.62325400 | -1.97598000 |
| N  | -1.06898500 | 0.76919000  | -2.05414000 |
| N  | -1.42184900 | -0.40991500 | 2.02707000  |
| N  | 1.07332900  | 0.98171900  | 1.96011700  |
| C  | 0.91337300  | -0.16305500 | -3.08382400 |
| C  | -0.41821100 | 0.44364000  | -3.13517100 |
| C  | -0.91620600 | 0.17144900  | 3.07755600  |
| C  | 0.41840600  | 0.77293500  | 3.06729700  |
| C  | 2.74538400  | -1.24288300 | -2.05400300 |
| C  | 3.89696900  | -0.41854800 | -2.18613300 |
| C  | 5.15204300  | -1.05529800 | -2.28841200 |
| C  | 5.26205200  | -2.45291300 | -2.26220500 |
| C  | 4.10940600  | -3.24058900 | -2.12966800 |
| C  | 2.82867400  | -2.66030800 | -2.01935900 |
| C  | 4.88593500  | 1.77481400  | -1.31170100 |
| C  | 3.82998300  | 1.11458400  | -2.23192500 |

|   |             |             |             |
|---|-------------|-------------|-------------|
| C | 3.99341700  | 1.64118000  | -3.68496400 |
| C | -1.96895500 | 4.62266600  | -0.49859900 |
| C | -1.52653100 | 3.58003700  | -1.55259200 |
| C | -0.91689300 | 4.28614700  | -2.79608000 |
| C | -2.42454300 | 1.26640300  | -2.23574500 |
| C | -2.66196500 | 2.64656700  | -1.98044900 |
| C | -3.94752400 | 3.16272100  | -2.23283600 |
| C | -4.97840800 | 2.33472100  | -2.70374300 |
| C | -4.73211300 | 0.97205400  | -2.91965800 |
| C | -3.45905700 | 0.39974900  | -2.69961000 |
| C | 1.70797100  | -4.57703500 | -0.76960300 |
| C | 1.59656400  | -3.56641100 | -1.93732300 |
| C | 1.36318700  | -4.28883700 | -3.29243800 |
| C | -4.29499600 | -1.94692700 | -2.16396200 |
| C | -3.26691500 | -1.09997700 | -2.95650700 |
| C | -3.34956700 | -1.42202100 | -4.47286600 |
| C | -2.75214800 | -1.00344700 | 2.16426900  |
| C | -2.85158200 | -2.41861000 | 2.24610800  |
| C | -4.13777000 | -2.97412700 | 2.40514100  |
| C | -5.28158500 | -2.16573200 | 2.47675900  |
| C | -5.15605000 | -0.77196200 | 2.39359700  |
| C | -3.89471900 | -0.15841000 | 2.23785700  |
| C | -1.75672900 | -4.47636700 | 1.21106600  |
| C | -1.62757000 | -3.33902200 | 2.25269100  |
| C | -1.38633400 | -3.90153900 | 3.68079300  |
| C | 2.01281000  | 4.60289700  | -0.03095600 |
| C | 1.55787900  | 3.72381400  | 1.15854800  |
| C | 0.97696200  | 4.60399300  | 2.30052800  |
| C | 2.43097300  | 1.48829600  | 2.09616500  |
| C | 2.67923200  | 2.83200600  | 1.69824500  |
| C | 3.96541100  | 3.36577400  | 1.90870900  |
| C | 4.98686900  | 2.58774300  | 2.47469200  |
| C | 4.73088100  | 1.25626200  | 2.82960700  |
| C | 3.45647800  | 0.67047200  | 2.65914400  |
| C | -4.84976200 | 1.96218900  | 1.17032800  |
| C | -3.81819600 | 1.37345500  | 2.16424800  |
| C | -4.01304300 | 2.01330800  | 3.56711700  |
| C | 4.28493400  | -1.72216300 | 2.37978500  |
| C | 3.25385300  | -0.79320000 | 3.06967900  |
| C | 3.32013000  | -0.95590900 | 4.61209300  |
| H | 1.44525000  | -0.26707100 | -4.03245600 |
| H | -0.85468000 | 0.57637900  | -4.12879000 |
| H | -1.45347400 | 0.18042300  | 4.02879900  |
| H | 0.85315100  | 1.00739800  | 4.04272500  |
| H | 6.05026500  | -0.45143400 | -2.38417800 |
| H | 6.23884800  | -2.92384000 | -2.34431400 |
| H | 4.20024200  | -4.32320000 | -2.11199700 |
| H | 2.84438600  | 1.43225900  | -1.86762200 |
| H | -0.73573800 | 2.96376500  | -1.10411200 |
| H | 5.90558300  | 1.60230400  | -1.67926200 |
| H | 4.82104600  | 1.38868600  | -0.28962400 |
| H | 4.73045800  | 2.86086800  | -1.27536500 |

|   |             |             |             |
|---|-------------|-------------|-------------|
| H | 4.96649500  | 1.34116300  | -4.09517700 |
| H | 3.93960300  | 2.73823800  | -3.70712100 |
| H | 3.21852200  | 1.24797600  | -4.35540500 |
| H | -2.69988300 | 5.33182200  | -0.90735300 |
| H | -1.10612900 | 5.20842600  | -0.15872800 |
| H | -2.42034900 | 4.13811200  | 0.37631900  |
| H | -0.55243300 | 3.55656800  | -3.53049000 |
| H | -0.07523100 | 4.92899600  | -2.50708100 |
| H | -1.67051800 | 4.91159000  | -3.29241700 |
| H | -4.14445900 | 4.21774800  | -2.06529000 |
| H | -5.96547600 | 2.74814200  | -2.89659900 |
| H | -5.53866800 | 0.33390600  | -3.27025600 |
| H | 0.70967100  | -2.96047000 | -1.72956200 |
| H | -2.29298300 | -1.41049200 | -2.56416800 |
| H | 2.57466200  | -5.24457800 | -0.87761300 |
| H | 0.80521900  | -5.20078300 | -0.73666800 |
| H | 1.78316100  | -4.02625500 | 0.17418700  |
| H | 2.20140000  | -4.95344700 | -3.54397400 |
| H | 1.24453800  | -3.57302300 | -4.11851600 |
| H | 0.45141500  | -4.89779100 | -3.23771300 |
| H | -4.19374100 | -1.76081900 | -1.08998800 |
| H | -4.09471300 | -3.01278500 | -2.33158300 |
| H | -5.33173600 | -1.74446300 | -2.46831900 |
| H | -4.33734200 | -1.17209500 | -4.88477300 |
| H | -3.17819700 | -2.49394300 | -4.63725100 |
| H | -2.60014900 | -0.86638100 | -5.05407700 |
| H | -4.24019600 | -4.05341600 | 2.47595700  |
| H | -6.26314400 | -2.61786800 | 2.59823300  |
| H | -6.04706000 | -0.15216300 | 2.44646500  |
| H | -0.73892700 | -2.76708500 | 1.97036000  |
| H | 0.74829800  | 3.07224000  | 0.80421600  |
| H | -2.62252200 | -5.12445600 | 1.40713300  |
| H | -0.85591200 | -5.10318900 | 1.23733200  |
| H | -1.84298000 | -4.03770700 | 0.21123200  |
| H | -1.25421200 | -3.09557800 | 4.41693900  |
| H | -0.47976000 | -4.52045900 | 3.68968100  |
| H | -2.22790800 | -4.52432000 | 4.01477500  |
| H | 2.77710800  | 5.33092000  | 0.26840400  |
| H | 1.16389800  | 5.17076800  | -0.43057000 |
| H | 2.42840200  | 3.99108800  | -0.84157900 |
| H | 0.60955800  | 3.98725000  | 3.13094400  |
| H | 0.14193200  | 5.21676200  | 1.93639000  |
| H | 1.74638200  | 5.27754600  | 2.70050200  |
| H | 4.16933200  | 4.39700300  | 1.63469800  |
| H | 5.97416400  | 3.01474600  | 2.63369900  |
| H | 5.53070500  | 0.65433100  | 3.25241000  |
| H | -2.82342200 | 1.65982900  | 1.79967600  |
| H | 2.28193500  | -1.13896600 | 2.70275000  |
| H | -5.87880600 | 1.81122400  | 1.52058700  |
| H | -4.75623800 | 1.50484000  | 0.18054100  |
| H | -4.69619600 | 3.04393900  | 1.06178000  |
| H | -3.95220300 | 3.10832300  | 3.50367100  |

|   |             |             |             |
|---|-------------|-------------|-------------|
| H | -3.25742000 | 1.67035100  | 4.28559300  |
| H | -4.99761600 | 1.75168900  | 3.97590400  |
| H | 4.19470500  | -1.64732200 | 1.29143700  |
| H | 4.07763300  | -2.76420000 | 2.65447200  |
| H | 5.31966900  | -1.49332500 | 2.67227700  |
| H | 2.57097300  | -0.33655000 | 5.12539700  |
| H | 4.30658400  | -0.67305500 | 5.00554000  |
| H | 3.13740600  | -2.00344100 | 4.88565400  |
| O | -1.22794200 | -1.84423900 | -0.74723600 |
| O | 1.23813900  | -1.75862200 | 0.91858000  |

**Dioxo Complex (conformation 2 higher energy)**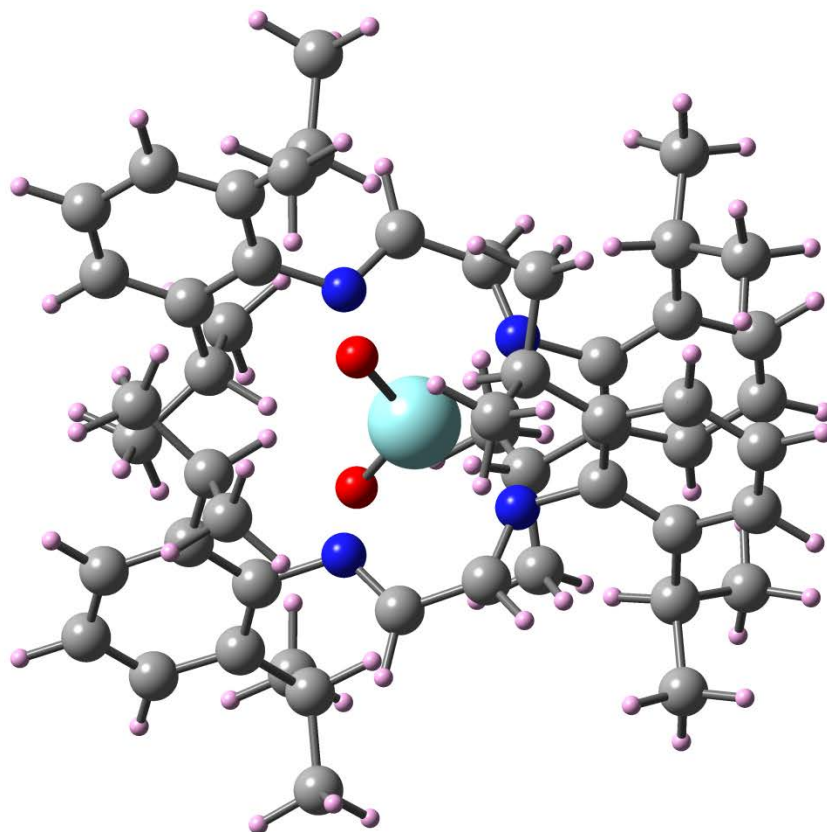

Fig. S10: NCCN Dioxo Complex (conformation 2 higher energy)

| SCF          | $E_{ZP}$     | H            | G            |
|--------------|--------------|--------------|--------------|
| -2440.712444 | -2439.573186 | -2439.505748 | -2439.677515 |

|   |             |             |             |
|---|-------------|-------------|-------------|
| O | -1.07422719 | -1.00615282 | -1.32332999 |
| O | -1.06653830 | 1.01012141  | 1.32667533  |
| N | 1.42229077  | 1.31371494  | -1.39163001 |
| N | -1.26999153 | 2.05391051  | -1.05802049 |
| N | -1.27169971 | -2.05256463 | 1.05826899  |
| N | 1.42090831  | -1.31530292 | 1.39265313  |
| C | 0.94103474  | 2.44496771  | -1.84377895 |
| C | -0.40274534 | 2.90817182  | -1.52566166 |
| C | -0.40652037 | -2.90621598 | 1.53100843  |
| C | 0.93712705  | -2.44336376 | 1.85003875  |
| C | 2.73869527  | 0.94522508  | -1.92262819 |
| C | 3.89614543  | 1.65597351  | -1.49570143 |
| C | 5.12448995  | 1.34432445  | -2.11772583 |
| C | 5.20521485  | 0.37405204  | -3.12686694 |
| C | 4.05138565  | -0.31904070 | -3.52258734 |
| C | 2.79692492  | -0.05566345 | -2.93325572 |
| C | 4.95665312  | 2.55956565  | 0.65172024  |

|   |             |             |             |
|---|-------------|-------------|-------------|
| C | 3.86068534  | 2.75663462  | -0.42489167 |
| C | 4.00354672  | 4.16769644  | -1.06084945 |
| C | -2.07315168 | 3.87601548  | 2.53615785  |
| C | -1.79890180 | 4.16702314  | 1.03823549  |
| C | -1.66879370 | 5.68929123  | 0.76908417  |
| C | -2.62028481 | 2.49274657  | -0.79008118 |
| C | -2.87813361 | 3.52565132  | 0.15712063  |
| C | -4.21974804 | 3.92063732  | 0.34197319  |
| C | -5.26490422 | 3.32191131  | -0.37576659 |
| C | -4.98627504 | 2.29501626  | -1.29219552 |
| C | -3.66731060 | 1.85454138  | -1.51713822 |
| C | 1.75118756  | -2.28249079 | -3.66630599 |
| C | 1.54323990  | -0.76265520 | -3.45978229 |
| C | 1.07065039  | -0.09701948 | -4.78186049 |
| C | -4.47319924 | -0.26260392 | -2.73163040 |
| C | -3.35745955 | 0.79510383  | -2.57651416 |
| C | -3.06992746 | 1.47665040  | -3.94420190 |
| C | -2.62164060 | -2.49206754 | 0.78829924  |
| C | -2.87728184 | -3.52590853 | -0.15820476 |
| C | -4.21848262 | -3.92149225 | -0.34531548 |
| C | -5.26517309 | -3.32212331 | 0.36958496  |
| C | -4.98854631 | -2.29405164 | 1.28538808  |
| C | -3.67011821 | -1.85318269 | 1.51242389  |
| C | -2.06765933 | -3.87966075 | -2.53535052 |
| C | -1.79605670 | -4.16790188 | -1.03641460 |
| C | -1.66560514 | -5.68976612 | -0.76487519 |
| C | 1.74440003  | 2.27461492  | 3.66909558  |
| C | 1.54060779  | 0.75307447  | 3.47081433  |
| C | 1.07828066  | 0.09157687  | 4.79849320  |
| C | 2.73710298  | -0.94630295 | 1.92446810  |
| C | 2.79444889  | 0.04940624  | 2.93998487  |
| C | 4.04931759  | 0.31264981  | 3.52877658  |
| C | 5.20399221  | -0.37579782 | 3.12782474  |
| C | 5.12392921  | -1.34118069 | 2.11378228  |
| C | 3.89540381  | -1.65226405 | 1.49198842  |
| C | -4.47889035 | 0.26567017  | 2.72183609  |
| C | -3.36230934 | -0.79163760 | 2.57019875  |
| C | -3.07622657 | -1.47026287 | 3.93966513  |
| C | 4.96260183  | -2.55755238 | -0.65238295 |
| C | 3.85858690  | -2.74860376 | 0.41688734  |
| C | 3.98706616  | -4.16310320 | 1.04858735  |
| H | 6.02365553  | 1.87244926  | -1.81219952 |
| H | 6.15975531  | 0.16021788  | -3.60160097 |
| H | 4.11998886  | -1.06726601 | -4.30707051 |
| H | 2.89237394  | 2.71488887  | 0.08858226  |
| H | -0.83716806 | 3.69218941  | 0.82270843  |
| H | 5.96228123  | 2.69716258  | 0.23346750  |
| H | 4.90492657  | 1.56239975  | 1.09761315  |
| H | 4.83048730  | 3.29884320  | 1.45373044  |
| H | 4.96132641  | 4.25912332  | -1.58965106 |
| H | 3.97157242  | 4.94130217  | -0.28234351 |
| H | 3.20673343  | 4.38189138  | -1.78408576 |

|   |             |             |             |
|---|-------------|-------------|-------------|
| H | -3.03725644 | 4.28681604  | 2.86454926  |
| H | -1.28622034 | 4.32748253  | 3.15778325  |
| H | -2.06320400 | 2.79168110  | 2.68568000  |
| H | -1.43380971 | 5.89922088  | -0.28418999 |
| H | -0.87168824 | 6.11993446  | 1.39046864  |
| H | -2.60044065 | 6.21841313  | 1.00885991  |
| H | -4.44756773 | 4.69636736  | 1.06896537  |
| H | -6.29067133 | 3.64719004  | -0.21682765 |
| H | -5.80127170 | 1.82984379  | -1.83799525 |
| H | 0.72349820  | -0.66029980 | -2.73983813 |
| H | -2.45584620 | 0.25204665  | -2.26228103 |
| H | 2.45097185  | -2.50338049 | -4.48400286 |
| H | 0.78939758  | -2.74837973 | -3.91197920 |
| H | 2.13073580  | -2.75954726 | -2.75322788 |
| H | 1.83435889  | -0.18600174 | -5.56705886 |
| H | 0.85528756  | 0.97055414  | -4.64053847 |
| H | 0.15128618  | -0.57968530 | -5.13648530 |
| H | -4.71594515 | -0.72529986 | -1.76760317 |
| H | -4.12710971 | -1.05841034 | -3.40369259 |
| H | -5.39460671 | 0.15524713  | -3.16284627 |
| H | -3.95441000 | 2.01713671  | -4.31098951 |
| H | -2.79645597 | 0.72063428  | -4.69283675 |
| H | -2.24198693 | 2.19500479  | -3.87344317 |
| H | -4.44460193 | -4.69807335 | -1.07192740 |
| H | -6.29059047 | -3.64767857 | 0.20897774  |
| H | -5.80474935 | -1.82823260 | 1.82884898  |
| H | -0.83489681 | -3.69254032 | -0.81961997 |
| H | 0.71779975  | 0.64472817  | 2.75535523  |
| H | -3.03013588 | -4.29319610 | -2.86511608 |
| H | -1.27847669 | -4.33045890 | -3.15460551 |
| H | -2.06022888 | -2.79562634 | -2.68706598 |
| H | -1.43240095 | -5.89801419 | 0.28911153  |
| H | -0.86716401 | -6.12087428 | -1.38422371 |
| H | -2.59655900 | -6.21968210 | -1.00557318 |
| H | 2.44959376  | 2.50141261  | 4.48052447  |
| H | 0.78278974  | 2.73835770  | 3.91945149  |
| H | 2.11544983  | 2.74868259  | 2.75102602  |
| H | 0.86645284  | -0.97753662 | 4.66329625  |
| H | 0.15913479  | 0.57228678  | 5.15640279  |
| H | 1.84594137  | 0.18689773  | 5.57907901  |
| H | 4.11735835  | 1.05719073  | 4.31686793  |
| H | 6.15891514  | -0.16169806 | 3.60166947  |
| H | 6.02387916  | -1.86550767 | 1.80420606  |
| H | -2.46033151 | -0.24900031 | 2.25639849  |
| H | 2.89343582  | -2.69735744 | -0.10187346 |
| H | -5.40037691 | -0.15204097 | 3.15300700  |
| H | -4.72114861 | 0.72604392  | 1.75658428  |
| H | -4.13409641 | 1.06319525  | 3.39249821  |
| H | -2.80396306 | -0.71261749 | 4.68708230  |
| H | -2.24794995 | -2.18845842 | 3.87140966  |
| H | -3.96099658 | -2.01032124 | 4.30637314  |
| H | 4.92492682  | -1.55766600 | -1.09360548 |



|    |             |             |             |
|----|-------------|-------------|-------------|
| H  | 4.83268452  | -3.29114037 | -1.45899188 |
| H  | 5.96431465  | -2.70905332 | -0.22948142 |
| H  | 3.18320045  | -4.37520613 | 1.76446837  |
| H  | 4.94006842  | -4.26236112 | 1.58457815  |
| H  | 3.95639993  | -4.93345566 | 0.26680370  |
| H  | 1.53294374  | 3.06659406  | -2.51939628 |
| H  | -0.65363468 | 3.94773168  | -1.74654864 |
| H  | -0.65903370 | -3.94478487 | 1.75460740  |
| H  | 1.52672916  | -3.06216854 | 2.53022131  |
| Zr | -0.17930832 | -0.00014668 | 0.00062684  |

## 2.4 Structures with three oxygen atoms

### Oxo Peroxo Complex (planar conformation)

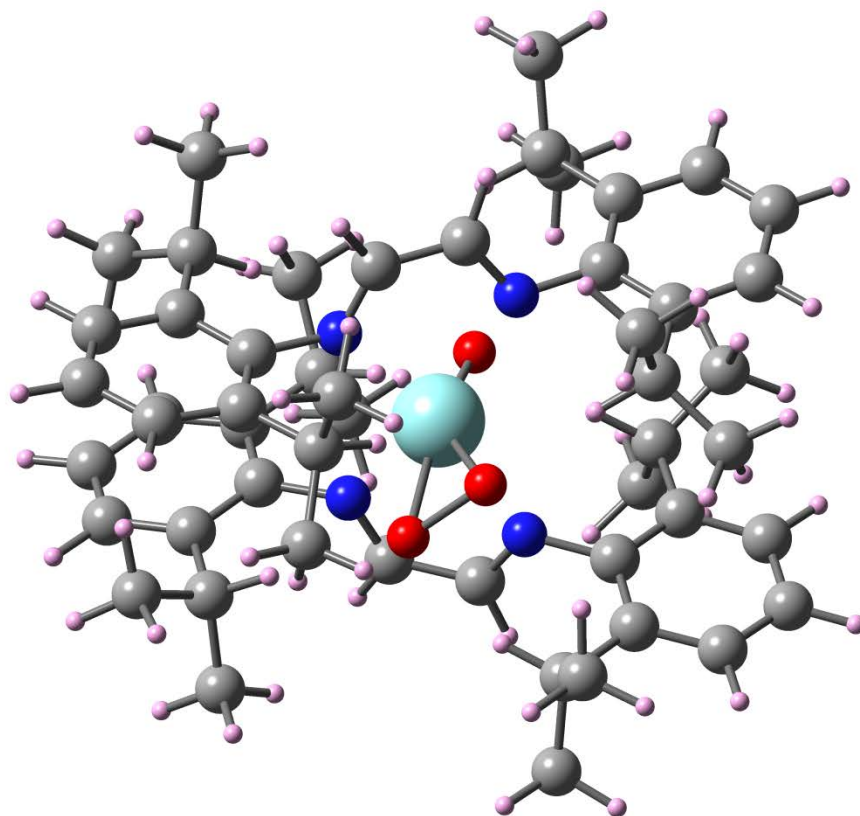

Fig. S11: NCCN Oxo Peroxo Complex (planar conformation)

| SCF          | E <sub>ZP</sub> | H            | G            |
|--------------|-----------------|--------------|--------------|
| -2515.884790 | -2514.740946    | -2514.672895 | -2514.842534 |

|   |             |             |             |
|---|-------------|-------------|-------------|
| O | 0.61628800  | 1.00286600  | -1.40796500 |
| O | 0.78666300  | -1.03914000 | 1.74053500  |
| O | -0.40424600 | -1.84307800 | 1.15878900  |
| N | -1.32878300 | -1.24229100 | -1.56708800 |
| N | 1.38720700  | -1.80498700 | -1.06289100 |
| N | 1.26075400  | 1.88130200  | 1.10291800  |
| N | -1.46312500 | 1.29353600  | 1.45724100  |
| C | -0.69526900 | -2.19126000 | -2.19234000 |
| C | 0.70307000  | -2.51906300 | -1.89933100 |
| C | 0.47391100  | 2.71345600  | 1.72274400  |
| C | -0.90170200 | 2.32672800  | 2.02320400  |
| C | -2.70303300 | -1.00506500 | -2.01409900 |
| C | -3.75044100 | -1.74963500 | -1.41048200 |
| C | -5.04715700 | -1.59132900 | -1.94390700 |
| C | -5.28521800 | -0.73593500 | -3.03204600 |
| C | -4.23074000 | 0.00200500  | -3.59257200 |

|   |             |             |             |
|---|-------------|-------------|-------------|
| C | -2.91535900 | -0.10515700 | -3.09229700 |
| C | -4.59068600 | -2.72343400 | 0.80965000  |
| C | -3.48021800 | -2.73684100 | -0.26750800 |
| C | -3.30253900 | -4.18078900 | -0.81543900 |
| C | 2.28118800  | -3.98748900 | 2.37619100  |
| C | 2.00471500  | -3.99599300 | 0.85189700  |
| C | 1.87916900  | -5.44941200 | 0.32005600  |
| C | 2.78004200  | -2.17444300 | -0.82956500 |
| C | 3.07990700  | -3.22739100 | 0.07476200  |
| C | 4.43980100  | -3.57418200 | 0.23327000  |
| C | 5.45231300  | -2.90428500 | -0.46806600 |
| C | 5.12297400  | -1.86428100 | -1.35295800 |
| C | 3.78307800  | -1.47591000 | -1.55747700 |
| C | -2.11800000 | 2.17813700  | -3.93697100 |
| C | -1.76533000 | 0.68417900  | -3.73189900 |
| C | -1.34726300 | 0.04273300  | -5.08315400 |
| C | 4.47309400  | 0.72553000  | -2.68907000 |
| C | 3.41792600  | -0.39960100 | -2.58701100 |
| C | 3.20713000  | -1.04256300 | -3.98753700 |
| C | 2.61347500  | 2.32450800  | 0.81252600  |
| C | 2.83218000  | 3.38419800  | -0.11300100 |
| C | 4.16520700  | 3.80152800  | -0.31649600 |
| C | 5.23267700  | 3.20149400  | 0.36571800  |
| C | 4.98801700  | 2.15416200  | 1.26871300  |
| C | 3.67962100  | 1.69200600  | 1.51292200  |
| C | 1.91878900  | 3.86411900  | -2.43979300 |
| C | 1.71519500  | 4.06336000  | -0.91611800 |
| C | 1.59766700  | 5.56839700  | -0.55568700 |
| C | -1.98331100 | -1.96557800 | 4.12066900  |
| C | -1.78149300 | -0.46155400 | 3.81606400  |
| C | -1.50547800 | 0.33058800  | 5.12396900  |
| C | -2.82032200 | 0.98258200  | 1.92593100  |
| C | -2.97214500 | 0.15009300  | 3.06737600  |
| C | -4.28384500 | -0.05484700 | 3.54809300  |
| C | -5.39229100 | 0.53474200  | 2.92405400  |
| C | -5.21091800 | 1.34944400  | 1.79542000  |
| C | -3.92385400 | 1.59790900  | 1.27461000  |
| C | 4.53030600  | -0.43070000 | 2.68970300  |
| C | 3.40893300  | 0.62693800  | 2.57972900  |
| C | 3.17789400  | 1.30390600  | 3.96099200  |
| C | -4.89131700 | 2.48022200  | -0.93642000 |
| C | -3.73722600 | 2.55642200  | 0.09046700  |
| C | -3.58397200 | 4.02583400  | 0.57711800  |
| H | -5.87312300 | -2.14729000 | -1.50974200 |
| H | -6.28984100 | -0.64137300 | -3.43770300 |
| H | -4.42903500 | 0.66958000  | -4.42692200 |
| H | -2.54274200 | -2.45026700 | 0.22591100  |
| H | 1.04247600  | -3.48912300 | 0.72949800  |
| H | -5.53377400 | -3.14021400 | 0.43033100  |
| H | -4.78391900 | -1.71004300 | 1.17549300  |
| H | -4.28101300 | -3.33789900 | 1.66458000  |
| H | -4.21007100 | -4.51530900 | -1.33646500 |

|   |             |             |             |
|---|-------------|-------------|-------------|
| H | -3.10518700 | -4.87483900 | 0.01158000  |
| H | -2.46475500 | -4.25454600 | -1.52007300 |
| H | 3.24336700  | -4.45350500 | 2.63127400  |
| H | 1.48931700  | -4.54186000 | 2.89752100  |
| H | 2.26542700  | -2.95660800 | 2.74297100  |
| H | 1.64268500  | -5.47174300 | -0.75333800 |
| H | 1.07994700  | -5.97971600 | 0.85508600  |
| H | 2.81227300  | -6.01165500 | 0.46383500  |
| H | 4.70276300  | -4.37594700 | 0.91845800  |
| H | 6.49244700  | -3.18985500 | -0.32793200 |
| H | 5.91316900  | -1.35136500 | -1.89298100 |
| H | -0.89858700 | 0.66487000  | -3.05877500 |
| H | 2.47189600  | 0.06805100  | -2.28129800 |
| H | -2.93632900 | 2.32175200  | -4.65592300 |
| H | -1.23853000 | 2.71192200  | -4.31890000 |
| H | -2.40672500 | 2.64739800  | -2.98846900 |
| H | -2.17686700 | 0.05415800  | -5.80380200 |
| H | -1.03138100 | -1.00156000 | -4.95624700 |
| H | -0.50652600 | 0.59703100  | -5.52017400 |
| H | 4.69526700  | 1.15634200  | -1.70705900 |
| H | 4.08993300  | 1.52985800  | -3.32961000 |
| H | 5.41381600  | 0.37153200  | -3.13414000 |
| H | 4.13000400  | -1.52353200 | -4.34084300 |
| H | 2.92010100  | -0.27324400 | -4.71680600 |
| H | 2.41662600  | -1.80402000 | -3.97621700 |
| H | 4.36592800  | 4.60157000  | -1.02453700 |
| H | 6.25016600  | 3.54459300  | 0.19342200  |
| H | 5.82018300  | 1.69405100  | 1.79229500  |
| H | 0.76455000  | 3.57364200  | -0.68738400 |
| H | -0.88910000 | -0.40766000 | 3.18683000  |
| H | 2.88547600  | 4.25811200  | -2.78131600 |
| H | 1.12661500  | 4.38738500  | -2.99386500 |
| H | 1.85003800  | 2.79651600  | -2.66944300 |
| H | 1.42065400  | 5.71940000  | 0.51862000  |
| H | 0.76578600  | 6.02660000  | -1.10729800 |
| H | 2.51262000  | 6.11597500  | -0.81755100 |
| H | -2.84442800 | -2.15204000 | 4.77771600  |
| H | -1.08824500 | -2.35781300 | 4.61988900  |
| H | -2.10734000 | -2.52310800 | 3.18714700  |
| H | -1.30344600 | 1.39255200  | 4.92456000  |
| H | -0.63035500 | -0.08825800 | 5.63742000  |
| H | -2.36112100 | 0.27971600  | 5.81154400  |
| H | -4.43262800 | -0.68287400 | 4.42188500  |
| H | -6.39263700 | 0.36194800  | 3.31382300  |
| H | -6.07587300 | 1.79961200  | 1.31825500  |
| H | 2.48785700  | 0.09371800  | 2.31893000  |
| H | -2.81068500 | 2.27865900  | -0.43085900 |
| H | 5.45728600  | -0.00873400 | 3.10286800  |
| H | 4.75652000  | -0.87846700 | 1.71567400  |
| H | 4.20806300  | -1.23579300 | 3.36170100  |
| H | 2.93855000  | 0.54471500  | 4.71688900  |
| H | 2.34662000  | 2.02049200  | 3.92972400  |

|    |             |             |             |
|----|-------------|-------------|-------------|
| H  | 4.07737900  | 1.84418900  | 4.28741300  |
| H  | -5.08626700 | 1.44978300  | -1.24705600 |
| H  | -4.63284500 | 3.06103900  | -1.83076200 |
| H  | -5.82014300 | 2.90344300  | -0.53131200 |
| H  | -2.71397200 | 4.16179000  | 1.23043300  |
| H  | -4.47493100 | 4.33982600  | 1.13687700  |
| H  | -3.46581200 | 4.69891600  | -0.28230100 |
| H  | -1.18640700 | -2.76668300 | -2.97993700 |
| H  | 1.14021200  | -3.37259500 | -2.42200200 |
| H  | 0.81162700  | 3.69883800  | 2.04892200  |
| H  | -1.44470800 | 2.92514500  | 2.75737500  |
| Zr | 0.05612000  | -0.04910500 | 0.06681400  |

**Oxo Peroxo Complex (butterfly conformation)**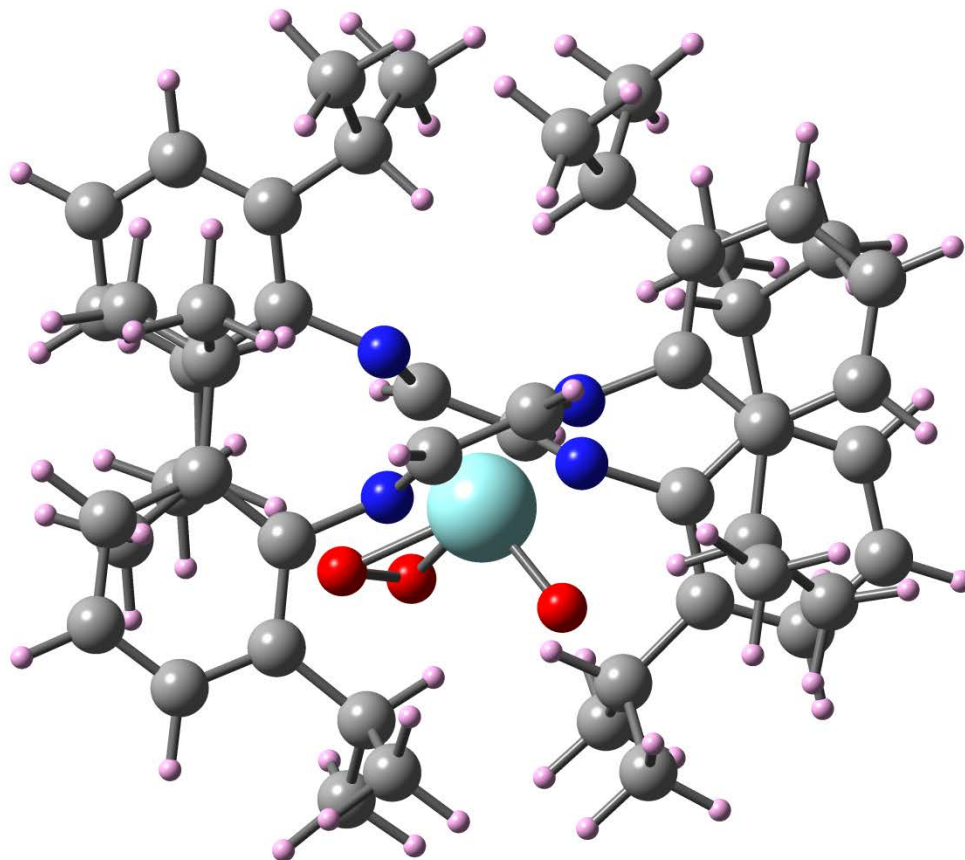

Fig. S12: NCCN Oxo Peroxo Complex (butterfly conformation)

| SCF          | E <sub>ZP</sub> | H            | G            |
|--------------|-----------------|--------------|--------------|
| -2515.882348 | -2514.738734    | -2514.670412 | -2514.842441 |

|   |             |             |             |
|---|-------------|-------------|-------------|
| O | -1.74120866 | -1.49663916 | -1.16507875 |
| N | 1.08496702  | -0.09293372 | 2.01133714  |
| N | -1.42903586 | -1.36909515 | 1.62547674  |
| N | 1.52686401  | 0.28945892  | -1.82838656 |
| N | -1.12299797 | 1.64720721  | -1.43929737 |
| C | 0.39287642  | -0.58286887 | 2.99934033  |
| C | -0.94075115 | -1.16618903 | 2.81231056  |
| C | 0.87900815  | 0.99385107  | -2.71218150 |
| C | -0.50499773 | 1.47952915  | -2.57579655 |
| C | 2.42960975  | 0.37918705  | 2.38036145  |
| C | 3.50251425  | -0.55228158 | 2.46250781  |
| C | 4.74744389  | -0.06766471 | 2.92338700  |
| C | 4.92307980  | 1.26922659  | 3.30319873  |
| C | 3.84796517  | 2.16531480  | 3.21080485  |
| C | 2.58683632  | 1.74541578  | 2.74209818  |
| C | 4.47074738  | -2.53058362 | 1.16749513  |

|   |             |             |             |
|---|-------------|-------------|-------------|
| C | 3.36057715  | -2.04186167 | 2.13161027  |
| C | 3.36148674  | -2.88938832 | 3.43346673  |
| C | -1.77166092 | -4.83664773 | -0.62787195 |
| C | -1.64648839 | -4.18880638 | 0.77340722  |
| C | -1.42964181 | -5.26570883 | 1.87155913  |
| C | -2.76021970 | -1.97066321 | 1.53316740  |
| C | -2.86362289 | -3.32192965 | 1.10665832  |
| C | -4.15144518 | -3.89438115 | 1.06192859  |
| C | -5.29183239 | -3.16036893 | 1.41653810  |
| C | -5.16233409 | -1.82555392 | 1.82579609  |
| C | -3.90049129 | -1.19871788 | 1.89404687  |
| C | 1.82305811  | 4.12854096  | 2.18643280  |
| C | 1.41502490  | 2.73369816  | 2.71855210  |
| C | 0.78380867  | 2.86589089  | 4.13311772  |
| C | -4.83910553 | 1.15883554  | 1.57677374  |
| C | -3.82648785 | 0.26908744  | 2.34014678  |
| C | -4.05076444 | 0.40346211  | 3.87180131  |
| C | 2.92775549  | -0.03710194 | -2.12519144 |
| C | 3.24088483  | -1.28198291 | -2.73950404 |
| C | 4.60141963  | -1.55748811 | -3.00036643 |
| C | 5.61267515  | -0.64465600 | -2.67685874 |
| C | 5.27670546  | 0.58504228  | -2.09178516 |
| C | 3.93619313  | 0.91870506  | -1.80779192 |
| C | 2.45151526  | -3.71100702 | -2.62132391 |
| C | 2.18984032  | -2.29794496 | -3.19946499 |
| C | 2.12275484  | -2.33170323 | -4.75139945 |
| C | -2.04128714 | 4.42178576  | 1.60271111  |
| C | -1.54696254 | 3.96995980  | 0.20679380  |
| C | -0.87207435 | 5.15053720  | -0.54627837 |
| C | -2.44936865 | 2.22616279  | -1.46838130 |
| C | -2.66805043 | 3.37361252  | -0.64741036 |
| C | -3.91579637 | 4.02300633  | -0.70598350 |
| C | -4.94229561 | 3.54586198  | -1.53434692 |
| C | -4.72820342 | 2.39660975  | -2.30610765 |
| C | -3.49438906 | 1.70954096  | -2.30086824 |
| C | 4.70282865  | 2.82351231  | -0.26208424 |
| C | 3.60777792  | 2.29998604  | -1.22212347 |
| C | 3.38408332  | 3.34834729  | -2.35002007 |
| C | -4.45522810 | -0.60678133 | -2.73885824 |
| C | -3.38394972 | 0.43599398  | -3.15199255 |
| C | -3.49838230 | 0.75894581  | -4.66657046 |
| H | 0.79795933  | -0.60814635 | 4.01405678  |
| H | -1.48427982 | -1.46413157 | 3.71109490  |
| H | 1.36359304  | 1.26093965  | -3.65583907 |
| H | -0.95730637 | 1.79522223  | -3.52047753 |
| H | 5.58333497  | -0.75783154 | 2.99492270  |
| H | 5.88802714  | 1.61142502  | 3.66920245  |
| H | 3.99119099  | 3.20000916  | 3.50764325  |
| H | 2.41760941  | -2.21250910 | 1.60339585  |
| H | -0.74892055 | -3.56582463 | 0.74286265  |
| H | 5.47055127  | -2.49060480 | 1.62244869  |
| H | 4.48358042  | -1.93439216 | 0.24812771  |

|   |             |             |             |
|---|-------------|-------------|-------------|
| H | 4.27250221  | -3.57209817 | 0.88491513  |
| H | 4.30621748  | -2.77915405 | 3.98412020  |
| H | 3.23226840  | -3.95141783 | 3.18796926  |
| H | 2.54590353  | -2.59937101 | 4.11107277  |
| H | -2.60914823 | -5.54679364 | -0.68238604 |
| H | -0.84994015 | -5.38455637 | -0.86295716 |
| H | -1.91273724 | -4.05813405 | -1.38432121 |
| H | -1.29592964 | -4.81167177 | 2.86392154  |
| H | -0.53131092 | -5.85423192 | 1.64400666  |
| H | -2.28234107 | -5.95599519 | 1.93202187  |
| H | -4.25655139 | -4.92811945 | 0.74413232  |
| H | -6.27495371 | -3.62296248 | 1.37231676  |
| H | -6.05212908 | -1.26018152 | 2.08866666  |
| H | 0.64365005  | 2.33708110  | 2.04510483  |
| H | -2.82711741 | 0.65922984  | 2.10985821  |
| H | 2.55413971  | 4.61733799  | 2.84208767  |
| H | 0.94701738  | 4.78446442  | 2.13376408  |
| H | 2.25874705  | 4.05916393  | 1.18333671  |
| H | 1.51940649  | 3.25560815  | 4.84885972  |
| H | 0.43233922  | 1.89837531  | 4.51361088  |
| H | -0.07172249 | 3.55306626  | 4.11230286  |
| H | -4.71144030 | 1.06791752  | 0.49336612  |
| H | -4.69555376 | 2.21259379  | 1.84652295  |
| H | -5.87527169 | 0.89409924  | 1.82290036  |
| H | -5.04242929 | 0.02492248  | 4.15130174  |
| H | -3.99159955 | 1.45625424  | 4.17969377  |
| H | -3.30898632 | -0.16375640 | 4.44960381  |
| H | 4.86308660  | -2.50205956 | -3.46922160 |
| H | 6.65300497  | -0.88351938 | -2.88481481 |
| H | 6.06532199  | 1.29106418  | -1.85183924 |
| H | 1.20318009  | -1.99845217 | -2.84138469 |
| H | -0.78613553 | 3.19266029  | 0.34694123  |
| H | 3.42448337  | -4.11629629 | -2.93344347 |
| H | 1.67249416  | -4.39965487 | -2.97475032 |
| H | 2.40053487  | -3.67860330 | -1.52831537 |
| H | 1.89596692  | -1.34000497 | -5.16707541 |
| H | 1.33160775  | -3.02086580 | -5.07340712 |
| H | 3.07127386  | -2.67081818 | -5.19080961 |
| H | -2.76627975 | 5.24263351  | 1.53497596  |
| H | -1.20165840 | 4.78561793  | 2.20746547  |
| H | -2.51962409 | 3.59394844  | 2.14196991  |
| H | -0.48452204 | 4.82755219  | -1.52089185 |
| H | -0.03542939 | 5.55873569  | 0.03568534  |
| H | -1.59230913 | 5.96024470  | -0.72366784 |
| H | -4.08588401 | 4.91220059  | -0.10571229 |
| H | -5.89988399 | 4.05978120  | -1.57200471 |
| H | -5.53385272 | 2.01677163  | -2.92866600 |
| H | 2.67428729  | 2.21488778  | -0.64870082 |
| H | -2.42236788 | -0.04855146 | -2.97680312 |
| H | 5.62191633  | 3.08165483  | -0.80395396 |
| H | 4.95006676  | 2.08668088  | 0.50788099  |
| H | 4.35792556  | 3.73684015  | 0.23852504  |



|    |             |             |             |
|----|-------------|-------------|-------------|
| H  | 3.16860949  | 4.33541312  | -1.91846080 |
| H  | 2.55147215  | 3.08094644  | -3.01041733 |
| H  | 4.28511556  | 3.43733212  | -2.97115970 |
| H  | -4.33656863 | -0.87742990 | -1.68517202 |
| H  | -4.31898910 | -1.52285807 | -3.32746713 |
| H  | -5.47849358 | -0.24192120 | -2.90633048 |
| H  | -2.73013186 | 1.47322210  | -4.99581300 |
| H  | -4.47701052 | 1.19130705  | -4.91668051 |
| H  | -3.37739946 | -0.16140598 | -5.25245268 |
| O  | 1.04293765  | -2.33596420 | 0.06225664  |
| O  | -0.70721191 | -1.22910520 | -2.24055695 |
| Zr | 0.02743171  | -0.85789707 | -0.28392100 |

$\eta^2$ -Ozone Complex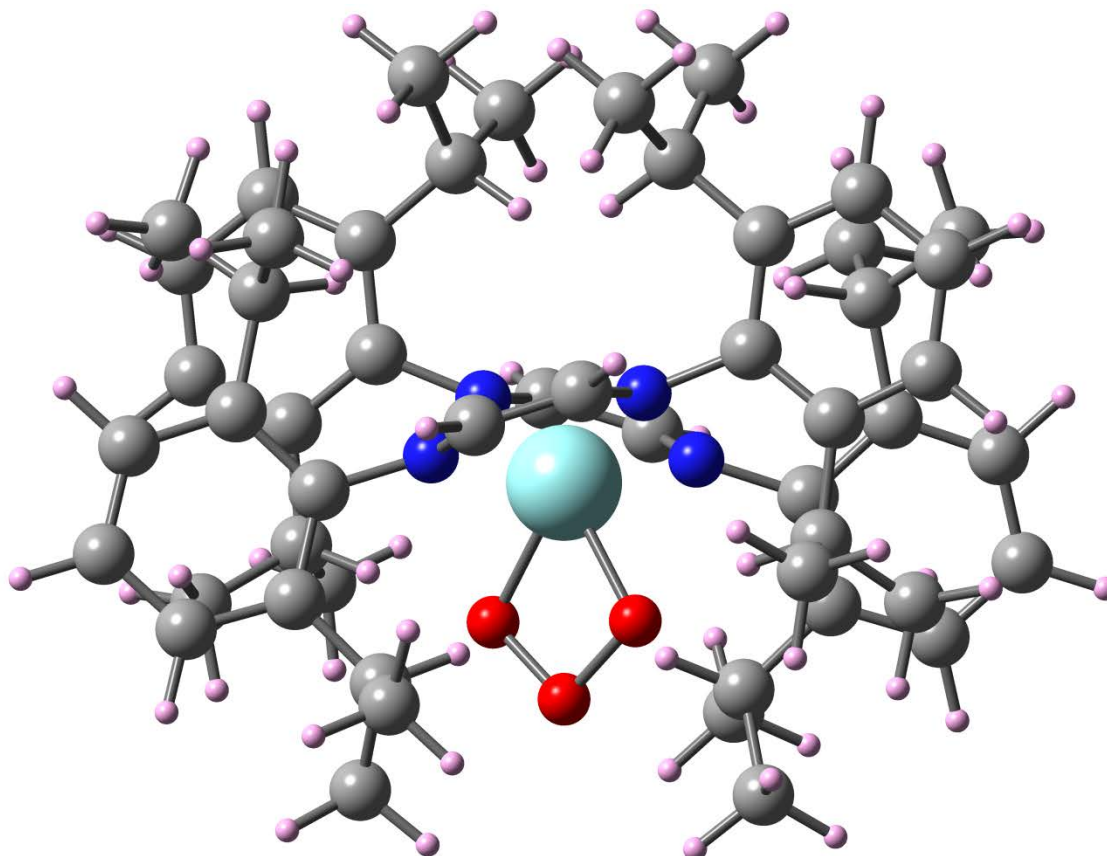Fig. S13: NCCN  $\eta^2$ -Ozone Complex

| SCF          | E <sub>ZP</sub> | H            | G            |
|--------------|-----------------|--------------|--------------|
| -2515.816724 | -2514.672824    | -2514.605650 | -2514.773407 |

|   |             |             |             |
|---|-------------|-------------|-------------|
| O | 0.89747800  | -2.32894500 | 0.78278300  |
| O | -0.88037300 | -2.34582100 | -0.70797100 |
| N | 1.66073400  | -0.31474800 | -1.61352600 |
| N | -1.00337600 | 0.45318200  | -1.74606200 |
| N | -1.65647400 | -0.26168500 | 1.62102400  |
| N | 1.00113900  | 0.51646000  | 1.74699200  |
| C | 1.11215000  | 0.03065800  | -2.79695500 |
| C | -0.22997200 | 0.45106000  | -2.86479000 |
| C | -1.11613100 | 0.11548000  | 2.79898000  |
| C | 0.22460200  | 0.53994700  | 2.86329500  |
| C | 3.05654200  | -0.76522300 | -1.70906500 |
| C | 4.10378400  | 0.20190400  | -1.64600800 |
| C | 5.43534000  | -0.24732700 | -1.77383700 |
| C | 5.73372800  | -1.60149500 | -1.98073900 |
| C | 4.69090000  | -2.52924200 | -2.08852800 |
| C | 3.33973100  | -2.13750500 | -1.96826400 |

|   |             |             |             |
|---|-------------|-------------|-------------|
| C | 4.95359800  | 2.46778100  | -0.78012400 |
| C | 3.83007600  | 1.70653300  | -1.52312000 |
| C | 3.63417600  | 2.35745300  | -2.92338300 |
| C | -1.81322400 | 4.47865200  | -0.72375300 |
| C | -1.34497000 | 3.38691400  | -1.72016300 |
| C | -0.73930900 | 4.04931400  | -2.98808000 |
| C | -2.34075700 | 1.00133200  | -2.02962700 |
| C | -2.47879800 | 2.42014400  | -2.09042500 |
| C | -3.69319300 | 2.95554400  | -2.56647300 |
| C | -4.75075200 | 2.12374400  | -2.95850900 |
| C | -4.60579100 | 0.73318100  | -2.86918600 |
| C | -3.40520300 | 0.13923700  | -2.41906600 |
| C | 2.49798600  | -4.50504100 | -1.44965700 |
| C | 2.25199200  | -3.18602200 | -2.22195400 |
| C | 2.12876200  | -3.46820100 | -3.74607800 |
| C | -4.53258100 | -2.11664100 | -1.93561100 |
| C | -3.27726600 | -1.38648600 | -2.47540400 |
| C | -2.97344200 | -1.84750600 | -3.92879300 |
| C | -3.05791100 | -0.69412700 | 1.71654700  |
| C | -3.35955300 | -2.05929100 | 1.99196700  |
| C | -4.71603100 | -2.43306700 | 2.10960200  |
| C | -5.74685800 | -1.49395900 | 1.98580200  |
| C | -5.43068000 | -0.14604000 | 1.76495300  |
| C | -4.09310500 | 0.28527900  | 1.63788500  |
| C | -2.54003500 | -4.44354900 | 1.51527800  |
| C | -2.28637100 | -3.11651100 | 2.27090700  |
| C | -2.18101000 | -3.37644400 | 3.80030100  |
| C | 1.87758400  | 4.50041600  | 0.56298500  |
| C | 1.38621800  | 3.44035400  | 1.58184300  |
| C | 0.75995000  | 4.14289600  | 2.81790600  |
| C | 2.34136600  | 1.06185500  | 2.02082500  |
| C | 2.50478100  | 2.47864500  | 2.00628100  |
| C | 3.72544000  | 3.01517600  | 2.46457300  |
| C | 4.76458100  | 2.18588700  | 2.91005300  |
| C | 4.59343100  | 0.79550600  | 2.89819600  |
| C | 3.38348000  | 0.20366900  | 2.47205400  |
| C | -4.90553300 | 2.54785300  | 0.72655800  |
| C | -3.80262200 | 1.78563800  | 1.49927900  |
| C | -3.62622600 | 2.45408800  | 2.89389800  |
| C | 4.39125000  | -2.09573500 | 1.96219800  |
| C | 3.21890200  | -1.31303900 | 2.60288200  |
| C | 3.04845600  | -1.71405700 | 4.09426800  |
| H | 6.24728000  | 0.47010800  | -1.71420000 |
| H | 6.76779600  | -1.92541700 | -2.07222100 |
| H | 4.92245000  | -3.57343400 | -2.27814300 |
| H | 2.89885600  | 1.83242600  | -0.95669700 |
| H | -0.54722800 | 2.81572100  | -1.23216300 |
| H | 5.86215400  | 2.53921800  | -1.39313000 |
| H | 5.21059700  | 1.98639400  | 0.16734800  |
| H | 4.63003600  | 3.49262100  | -0.56206600 |
| H | 4.52316500  | 2.19548100  | -3.54751000 |
| H | 3.48585500  | 3.44142600  | -2.82046000 |

|   |             |             |             |
|---|-------------|-------------|-------------|
| H | 2.76801400  | 1.95038000  | -3.45473400 |
| H | -2.61285200 | 5.09890500  | -1.14753200 |
| H | -0.97914800 | 5.14638900  | -0.47545700 |
| H | -2.18599800 | 4.03593000  | 0.20700900  |
| H | -0.35075700 | 3.29789800  | -3.68585100 |
| H | 0.08687200  | 4.71883400  | -2.71357800 |
| H | -1.49483000 | 4.64263900  | -3.51977300 |
| H | -3.80972800 | 4.03390700  | -2.63657000 |
| H | -5.67725300 | 2.55474900  | -3.33025000 |
| H | -5.42687100 | 0.09184000  | -3.17558100 |
| H | 1.29046700  | -2.79831400 | -1.88417800 |
| H | -2.44288400 | -1.71990700 | -1.85451600 |
| H | 3.39902300  | -5.02636000 | -1.80076000 |
| H | 1.64419900  | -5.17869800 | -1.59085700 |
| H | 2.59670700  | -4.31237600 | -0.37632000 |
| H | 3.06356400  | -3.88126400 | -4.14881400 |
| H | 1.89560600  | -2.55544400 | -4.31051600 |
| H | 1.32647300  | -4.19483400 | -3.93046200 |
| H | -4.79171800 | -1.77477900 | -0.92733300 |
| H | -4.33233400 | -3.19469000 | -1.88522600 |
| H | -5.40809100 | -1.97609300 | -2.58414300 |
| H | -3.78602400 | -1.56403000 | -4.61233400 |
| H | -2.86348700 | -2.93927600 | -3.96017700 |
| H | -2.04241100 | -1.40538700 | -4.30557200 |
| H | -4.96135500 | -3.47177400 | 2.31162900  |
| H | -6.78528200 | -1.80382300 | 2.07672900  |
| H | -6.23342100 | 0.58076500  | 1.69368000  |
| H | -1.31688800 | -2.74492200 | 1.93774600  |
| H | 0.59514300  | 2.85679700  | 1.09681600  |
| H | -3.45313600 | -4.94682200 | 1.86144800  |
| H | -1.69780800 | -5.12677000 | 1.67809200  |
| H | -2.62132300 | -4.26530100 | 0.43789000  |
| H | -1.94151400 | -2.45749900 | 4.35193800  |
| H | -1.38966600 | -4.10995900 | 4.00365500  |
| H | -3.12461600 | -3.77116700 | 4.20080500  |
| H | 2.66951500  | 5.13237900  | 0.98401500  |
| H | 1.05018000  | 5.16204000  | 0.27874500  |
| H | 2.26768900  | 4.03078500  | -0.34725900 |
| H | 0.35476200  | 3.41414200  | 3.53005400  |
| H | -0.05760000 | 4.80782000  | 2.50835200  |
| H | 1.50889500  | 4.74818100  | 3.34559600  |
| H | 3.86269100  | 4.09325200  | 2.47857400  |
| H | 5.69639700  | 2.62005800  | 3.26451500  |
| H | 5.39810200  | 0.15454200  | 3.24806600  |
| H | -2.86067000 | 1.89548600  | 0.94760900  |
| H | 2.31207600  | -1.62396400 | 2.08079800  |
| H | -5.82352900 | 2.63707900  | 1.32289800  |
| H | -5.15199300 | 2.05637000  | -0.21831100 |
| H | -4.56765700 | 3.56656000  | 0.50076000  |
| H | -3.46357400 | 3.53470400  | 2.77864200  |
| H | -2.77562700 | 2.04483300  | 3.44813900  |
| H | -4.52902400 | 2.31072100  | 3.50256300  |

|    |             |             |             |
|----|-------------|-------------|-------------|
| H  | 4.52907900  | -1.81717300 | 0.91190600  |
| H  | 4.17841600  | -3.17178900 | 2.00086700  |
| H  | 5.33946800  | -1.92548400 | 2.49052900  |
| H  | 2.18213200  | -1.21514500 | 4.54802200  |
| H  | 3.93754700  | -1.44929200 | 4.68306700  |
| H  | 2.89512700  | -2.79802100 | 4.17603900  |
| O  | 0.00690000  | -3.30769800 | 0.05084200  |
| H  | -0.64865000 | 0.76622900  | -3.81709800 |
| H  | 1.69738200  | -0.03591900 | -3.71146500 |
| H  | -1.70772600 | 0.07328100  | 3.71076400  |
| H  | 0.64003200  | 0.87689000  | 3.80966300  |
| Zr | 0.00684600  | -0.60308000 | 0.01479300  |

## 2.5 Structures with four oxygen atoms

### Bisperoxo Complex (spiro conformation)

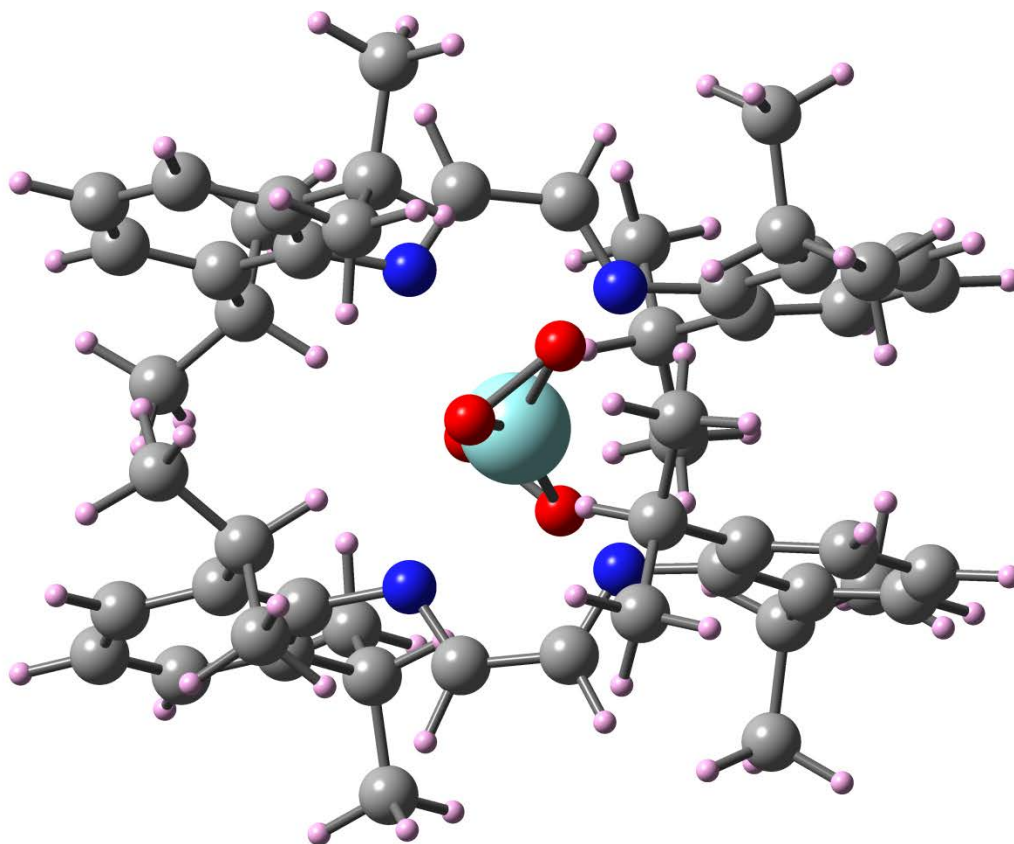

Fig. S14: NCCN Bisperoxo Complex (spiro conformation)

|    | <b>SCF</b>   | <b>E<sub>ZP</sub></b> | <b>H</b>     | <b>G</b>     |
|----|--------------|-----------------------|--------------|--------------|
|    | -2591.070000 | -2589.922304          | -2589.853400 | -2590.024327 |
| Zr | -0.00199902  | 0.00004265            | -0.00034077  |              |
| O  | -0.58471854  | 0.10989537            | 2.00325607   |              |
| O  | 0.58746591   | 1.06256560            | 1.69868255   |              |
| O  | 0.58747253   | -1.06257207           | -1.69925567  |              |
| O  | -0.58452142  | -0.10972233           | -2.00398624  |              |
| N  | -1.36244369  | 2.04611983            | -0.25295198  |              |
| N  | 1.36106585   | 1.82040696            | -0.96941426  |              |
| N  | 1.36073561   | -1.82035787           | 0.96939627   |              |
| N  | -1.36272036  | -2.04584644           | 0.25274063   |              |
| C  | -0.69785078  | 3.05547602            | -0.72425627  |              |
| C  | 0.70076202   | 2.92209970            | -1.14977661  |              |
| C  | 0.70003324   | -2.92164440           | 1.15073762   |              |
| C  | -0.69858556  | -3.05495440           | 0.72520485   |              |
| C  | -2.74048131  | 2.30806457            | 0.16509761   |              |
| C  | -3.78629654  | 2.03523097            | -0.75819510  |              |

|   |             |             |             |
|---|-------------|-------------|-------------|
| C | -5.10181039 | 2.35158919  | -0.36097552 |
| C | -5.36465544 | 2.92247965  | 0.89493957  |
| C | -4.31047182 | 3.18004976  | 1.78304607  |
| C | -2.97335429 | 2.87691335  | 1.44551817  |
| C | -4.60166460 | 0.56109746  | -2.70021932 |
| C | -3.49553960 | 1.49979302  | -2.16567172 |
| C | -3.28466840 | 2.67590033  | -3.16137336 |
| C | 2.11393409  | -0.11427433 | -4.60904986 |
| C | 1.84606758  | 1.19154759  | -3.82066857 |
| C | 1.62142482  | 2.38289683  | -4.79167266 |
| C | 2.74003250  | 1.79444201  | -1.46049219 |
| C | 2.97447017  | 1.50952944  | -2.83191327 |
| C | 4.31130363  | 1.56276735  | -3.28296065 |
| C | 5.36440757  | 1.87559255  | -2.41126989 |
| C | 5.10016357  | 2.14528014  | -1.05869694 |
| C | 3.78440881  | 2.11664129  | -0.55180800 |
| C | -2.10882975 | 2.57326187  | 3.83087984  |
| C | -1.84583590 | 3.19359138  | 2.43622566  |
| C | -1.63240213 | 4.72796415  | 2.54841611  |
| C | 4.58774477  | 2.02438897  | 1.88759650  |
| C | 3.49429858  | 2.50213176  | 0.90403343  |
| C | 3.31284978  | 4.04130780  | 1.03291591  |
| C | 2.73961523  | -1.79450686 | 1.46067844  |
| C | 2.97380035  | -1.50995448 | 2.83221457  |
| C | 4.31048631  | -1.56384782 | 3.28361845  |
| C | 5.36368498  | -1.87700607 | 2.41216275  |
| C | 5.09969276  | -2.14627545 | 1.05945053  |
| C | 3.78409899  | -2.11687209 | 0.55218666  |
| C | 2.11353141  | 0.11434266  | 4.60899690  |
| C | 1.84528457  | -1.19143720 | 3.82068565  |
| C | 1.61988745  | -2.38257824 | 4.79177367  |
| C | -2.10879957 | -2.57419104 | -3.83150317 |
| C | -1.84584329 | -3.19325831 | -2.43629053 |
| C | -1.63182220 | -4.72764872 | -2.54723792 |
| C | -2.74079615 | -2.30775522 | -0.16536541 |
| C | -2.97358244 | -2.87631702 | -1.44592547 |
| C | -4.31068322 | -3.17925733 | -1.78367274 |
| C | -5.36493643 | -2.92181212 | -0.89560707 |
| C | -5.10216376 | -2.35130112 | 0.36048811  |
| C | -3.78665864 | -2.03513352 | 0.75791950  |
| C | 4.58843693  | -2.02528052 | -1.88695898 |
| C | 3.49416391  | -2.50195854 | -0.90379380 |
| C | 3.31111358  | -4.04093702 | -1.03272514 |
| C | -4.60165264 | -0.56031102 | 2.69954779  |
| C | -3.49611358 | -1.50004613 | 2.16558103  |
| C | -3.28683747 | -2.67641164 | 3.16131757  |
| H | -1.15557100 | 4.04264230  | -0.81682622 |
| H | 1.16058196  | 3.78796034  | -1.63086756 |
| H | 1.15951313  | -3.78720411 | 1.63269396  |
| H | -1.15664396 | -4.04188018 | 0.81865940  |
| H | -5.92470637 | 2.15486152  | -1.04136143 |
| H | -6.38632324 | 3.16468468  | 1.17819453  |

|   |             |             |             |
|---|-------------|-------------|-------------|
| H | -4.52347944 | 3.61942383  | 2.75392745  |
| H | -2.56449325 | 0.92060717  | -2.13466102 |
| H | 0.92085837  | 1.01524404  | -3.26427043 |
| H | -5.53352013 | 1.10390892  | -2.91043882 |
| H | -4.82211811 | -0.24425299 | -1.99208428 |
| H | -4.27113199 | 0.10221980  | -3.64046523 |
| H | -4.18963180 | 3.29509740  | -3.22994403 |
| H | -3.05751566 | 2.28608363  | -4.16210316 |
| H | -2.45463895 | 3.32784894  | -2.86088253 |
| H | 3.02982428  | -0.05911005 | -5.21374020 |
| H | 1.27413289  | -0.31224725 | -5.28806902 |
| H | 2.18732153  | -0.95847824 | -3.91643285 |
| H | 1.38010377  | 3.30943054  | -4.25174416 |
| H | 0.78984685  | 2.16208498  | -5.47385413 |
| H | 2.51556849  | 2.57848803  | -5.39947107 |
| H | 4.52435333  | 1.35394973  | -4.32789061 |
| H | 6.38608744  | 1.91009133  | -2.78232550 |
| H | 5.92189384  | 2.38577391  | -0.39086158 |
| H | -0.91687736 | 2.73730125  | 2.08167399  |
| H | 2.55336236  | 2.03009136  | 1.21126936  |
| H | -3.02873024 | 2.95707562  | 4.29327035  |
| H | -1.27165762 | 2.80789110  | 4.50137334  |
| H | -2.17246406 | 1.48388316  | 3.74711933  |
| H | -2.53018215 | 5.23090479  | 2.93327994  |
| H | -1.39333967 | 5.17880437  | 1.57484482  |
| H | -0.80302074 | 4.94437846  | 3.23471374  |
| H | 4.78595487  | 0.95323809  | 1.77823312  |
| H | 4.25797049  | 2.20278989  | 2.91883337  |
| H | 5.53186476  | 2.56845137  | 1.74725106  |
| H | 4.22810115  | 4.56805592  | 0.73008081  |
| H | 3.09030489  | 4.30879631  | 2.07407357  |
| H | 2.49031355  | 4.41347195  | 0.40878630  |
| H | 4.52334995  | -1.35523487 | 4.32862781  |
| H | 6.38524573  | -1.91202963 | 2.78349454  |
| H | 5.92149913  | -2.38701586 | 0.39179972  |
| H | 0.92027054  | -1.01477932 | 3.26406950  |
| H | -0.91712132 | -2.73636611 | -2.08189993 |
| H | 3.02922643  | 0.05879609  | 5.21394953  |
| H | 1.27364202  | 0.31279246  | 5.28776896  |
| H | 2.18752449  | 0.95845620  | 3.91632899  |
| H | 1.37817289  | -3.30904572 | 4.25191187  |
| H | 0.78832760  | -2.16126296 | 5.47381518  |
| H | 2.51384584  | -2.57856174 | 5.39971798  |
| H | -3.02829936 | -2.95893390 | -4.29391229 |
| H | -1.27126559 | -2.80883099 | -4.50153478 |
| H | -2.17316457 | -1.48478380 | -3.74868182 |
| H | -1.39266765 | -5.17762310 | -1.57328754 |
| H | -0.80229180 | -4.94430784 | -3.23328059 |
| H | -2.52939481 | -5.23121491 | -2.93177246 |
| H | -4.52362946 | -3.61841531 | -2.75466262 |
| H | -6.38659519 | -3.16386496 | -1.17902547 |
| H | -5.92511055 | -2.15469823 | 1.04085387  |



|   |             |             |             |
|---|-------------|-------------|-------------|
| H | 2.55383452  | -2.02894758 | -1.21137033 |
| H | -2.56453572 | -0.92170582 | 2.13509550  |
| H | 5.53200330  | -2.57019314 | -1.74620893 |
| H | 4.78757080  | -0.95429359 | -1.77759547 |
| H | 4.25890532  | -2.20344780 | -2.91831237 |
| H | 3.08856492  | -4.30818858 | -2.07394153 |
| H | 2.48798817  | -4.41218911 | -0.40881638 |
| H | 4.22570160  | -4.56868497 | -0.72962644 |
| H | -4.82090849 | 0.24525358  | 1.99129129  |
| H | -4.27122274 | -0.10177237 | 3.63999685  |
| H | -5.53415715 | -1.10222393 | 2.90919969  |
| H | -2.45714020 | -3.32899778 | 2.86127838  |
| H | -4.19232157 | -3.29491219 | 3.22925345  |
| H | -3.06001852 | -2.28688537 | 4.16223703  |

**Bisperoxo Complex (planar conformation)**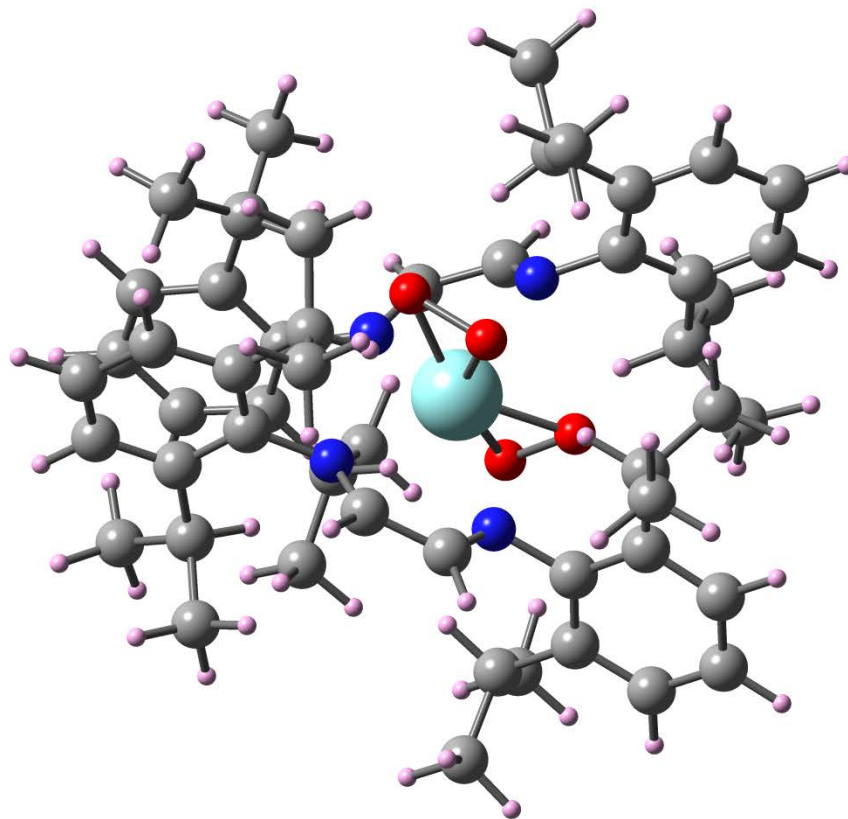

Fig. S15: NCCN Bisperoxo Complex (planar conformation)

| SCF          | $E_{ZP}$     | H            | G            |
|--------------|--------------|--------------|--------------|
| -2591.041198 | -2589.895299 | -2589.825726 | -2590.001244 |

|   |             |             |             |
|---|-------------|-------------|-------------|
| O | 2.15655016  | -0.57238240 | -0.64070206 |
| N | -1.68607456 | -0.99600991 | 1.57614442  |
| N | 0.87511703  | -2.07537111 | 1.22010669  |
| N | 1.55739746  | 1.88316542  | -1.07288772 |
| N | -1.05178296 | 1.00246930  | -1.78321228 |
| C | -1.16358631 | -1.80143621 | 2.45179862  |
| C | 0.14067263  | -2.43389500 | 2.22475043  |
| C | 1.06444804  | 2.11434913  | -2.25469976 |
| C | -0.31079652 | 1.73026046  | -2.57251982 |
| C | -3.01715654 | -0.49108627 | 1.90869180  |
| C | -3.18782090 | 0.45615895  | 2.95713930  |
| C | -4.51045156 | 0.84616912  | 3.26617976  |
| C | -5.61286645 | 0.31816507  | 2.58207100  |
| C | -5.41694048 | -0.63397137 | 1.56836494  |
| C | -4.12262665 | -1.06533526 | 1.21819435  |
| C | -2.04649804 | 2.58622112  | 3.78904891  |
| C | -2.03379667 | 1.03730849  | 3.78582218  |
| C | -2.07890653 | 0.49281461  | 5.24082862  |

|   |             |             |             |
|---|-------------|-------------|-------------|
| C | 4.40339466  | -0.16593109 | 2.32648014  |
| C | 3.27231902  | -1.16111229 | 2.68961349  |
| C | 3.37156665  | -1.58554796 | 4.17947546  |
| C | 2.13595047  | -2.79606809 | 1.03058215  |
| C | 3.27786124  | -2.38335025 | 1.76401840  |
| C | 4.45703915  | -3.14120022 | 1.61336857  |
| C | 4.50448865  | -4.25439859 | 0.76006784  |
| C | 3.36523423  | -4.62205721 | 0.02941282  |
| C | 2.15895319  | -3.89960721 | 0.14372724  |
| C | -5.03065346 | -2.29411769 | -0.85643432 |
| C | -3.92312122 | -2.21030425 | 0.21776290  |
| C | -3.83439738 | -3.57390178 | 0.96282527  |
| C | 1.25635315  | -4.32158604 | -2.19422512 |
| C | 0.93861283  | -4.32744692 | -0.67757279 |
| C | 0.40382533  | -5.70929593 | -0.21667446 |
| C | 2.90119380  | 2.34057341  | -0.76785909 |
| C | 4.01737725  | 1.87470203  | -1.52706851 |
| C | 5.29137564  | 2.37195329  | -1.17845199 |
| C | 5.46235976  | 3.29488907  | -0.13696178 |
| C | 4.34714183  | 3.74608159  | 0.58436827  |
| C | 3.04939688  | 3.28201980  | 0.29055544  |
| C | 4.81988707  | -0.37940541 | -2.41700383 |
| C | 3.92462661  | 0.85906754  | -2.67550931 |
| C | 4.28684127  | 1.52122662  | -4.03317162 |
| C | -4.19212160 | 3.17277493  | 0.22194291  |
| C | -3.05347594 | 2.86521622  | -0.77794057 |
| C | -2.65928075 | 4.16522681  | -1.53465766 |
| C | -2.43535967 | 0.82826833  | -2.23052601 |
| C | -3.41185201 | 1.75153688  | -1.77007844 |
| C | -4.70793602 | 1.65354597  | -2.31780566 |
| C | -5.01494726 | 0.68700271  | -3.28977670 |
| C | -4.03335007 | -0.22170014 | -3.71348842 |
| C | -2.72415619 | -0.17990349 | -3.18792834 |
| C | 2.04343841  | 3.95025365  | 2.55183461  |
| C | 1.84288049  | 3.87633941  | 1.02039387  |
| C | 1.51402932  | 5.27950778  | 0.43720133  |
| C | -2.15631371 | -2.63290736 | -3.65257005 |
| C | -1.65819045 | -1.16632026 | -3.68448527 |
| C | -1.18125075 | -0.79618280 | -5.11516958 |
| H | -1.69304443 | -2.06853456 | 3.36920808  |
| H | 0.44831010  | -3.22312921 | 2.91420289  |
| H | 1.62121321  | 2.65541494  | -3.02147285 |
| H | -0.72236163 | 2.12591176  | -3.50428874 |
| H | -4.67223532 | 1.57265185  | 4.05784024  |
| H | -6.61950636 | 0.63718367  | 2.84156470  |
| H | -6.27772348 | -1.05171915 | 1.05619034  |
| H | -1.08030008 | 0.75202426  | 3.33554513  |
| H | 2.33174236  | -0.61614011 | 2.56268028  |
| H | -2.96490344 | 2.99549088  | 4.23219416  |
| H | -1.93475090 | 2.95846950  | 2.76678397  |
| H | -1.19535105 | 2.95841332  | 4.37421081  |
| H | -2.99938362 | 0.79912550  | 5.75626327  |

|   |             |             |             |
|---|-------------|-------------|-------------|
| H | -1.22672003 | 0.88268238  | 5.81278956  |
| H | -2.03409918 | -0.60510963 | 5.27286942  |
| H | 5.39835471  | -0.59793190 | 2.50010989  |
| H | 4.31693780  | 0.73828597  | 2.94259105  |
| H | 4.33642647  | 0.13437019  | 1.27552301  |
| H | 2.54172274  | -2.24486073 | 4.47050224  |
| H | 3.34617683  | -0.70076413 | 4.82913019  |
| H | 4.30768500  | -2.12523678 | 4.37687846  |
| H | 5.34816866  | -2.85036230 | 2.16377086  |
| H | 5.42452867  | -4.82540145 | 0.65966192  |
| H | 3.41125483  | -5.47776692 | -0.63972356 |
| H | -2.96478461 | -2.04593106 | -0.29605745 |
| H | 0.14410907  | -3.58829703 | -0.52439837 |
| H | -5.98710526 | -2.61415439 | -0.42198076 |
| H | -4.75675219 | -3.03646398 | -1.61678470 |
| H | -5.18006207 | -1.33418483 | -1.35873559 |
| H | -4.77396264 | -3.77902637 | 1.49277239  |
| H | -3.02358021 | -3.59474920 | 1.70025463  |
| H | -3.66071153 | -4.38919443 | 0.24790110  |
| H | 1.56061335  | -3.31549843 | -2.50100075 |
| H | 0.36509086  | -4.61208068 | -2.76789950 |
| H | 2.05749976  | -5.02989384 | -2.44330753 |
| H | 1.15605776  | -6.49517257 | -0.36565196 |
| H | -0.49019301 | -5.98704821 | -0.79163154 |
| H | 0.13793205  | -5.70383832 | 0.84946788  |
| H | 6.16104635  | 2.02305220  | -1.72924194 |
| H | 6.45659306  | 3.66189772  | 0.10769525  |
| H | 4.48218939  | 4.47130318  | 1.38182236  |
| H | 2.90402824  | 0.47284762  | -2.73575585 |
| H | -2.18354323 | 2.54057475  | -0.19327146 |
| H | 5.88268303  | -0.11343604 | -2.33714846 |
| H | 4.71478349  | -1.09310935 | -3.24573246 |
| H | 4.50161186  | -0.87970920 | -1.49789685 |
| H | 3.64465516  | 2.38544106  | -4.25578509 |
| H | 4.17620158  | 0.79486379  | -4.84965270 |
| H | 5.32583933  | 1.87688268  | -4.03930615 |
| H | -5.05572486 | 3.63942670  | -0.27175004 |
| H | -3.83202014 | 3.87548534  | 0.98394295  |
| H | -4.53361758 | 2.26748775  | 0.73299639  |
| H | -1.80491788 | 4.01087898  | -2.20554345 |
| H | -2.38378341 | 4.94905931  | -0.81740845 |
| H | -3.49925841 | 4.53292881  | -2.13970431 |
| H | -5.47868864 | 2.34488358  | -1.99009045 |
| H | -6.01611137 | 0.64095778  | -3.71185679 |
| H | -4.28459943 | -0.97111884 | -4.45952483 |
| H | 0.97797273  | 3.22924516  | 0.85476199  |
| H | -0.78594469 | -1.10935092 | -3.02381701 |
| H | 2.85936788  | 4.62832522  | 2.83947336  |
| H | 2.24617052  | 2.95148274  | 2.95242560  |
| H | 1.12297084  | 4.31839204  | 3.02407959  |
| H | 0.61896801  | 5.69075843  | 0.92348607  |
| H | 1.32187636  | 5.23108491  | -0.64392785 |

|    |             |             |             |
|----|-------------|-------------|-------------|
| H  | 2.34293035  | 5.98306668  | 0.59806584  |
| H  | -2.48723286 | -2.91828737 | -2.64640027 |
| H  | -1.34181818 | -3.30654668 | -3.94567614 |
| H  | -2.99223305 | -2.79871312 | -4.34477290 |
| H  | -0.75560492 | 0.21486754  | -5.15107353 |
| H  | -2.01284221 | -0.83415854 | -5.83174437 |
| H  | -0.40682406 | -1.49802153 | -5.44986964 |
| O  | 0.75667193  | 0.91352852  | 1.84567051  |
| O  | -0.44675049 | 1.64082792  | 1.16085780  |
| O  | 1.05768391  | -0.98466162 | -1.62710814 |
| Zr | 0.29155636  | 0.04225162  | 0.04539441  |

**Bisperoxo Complex (butterfly conformation)**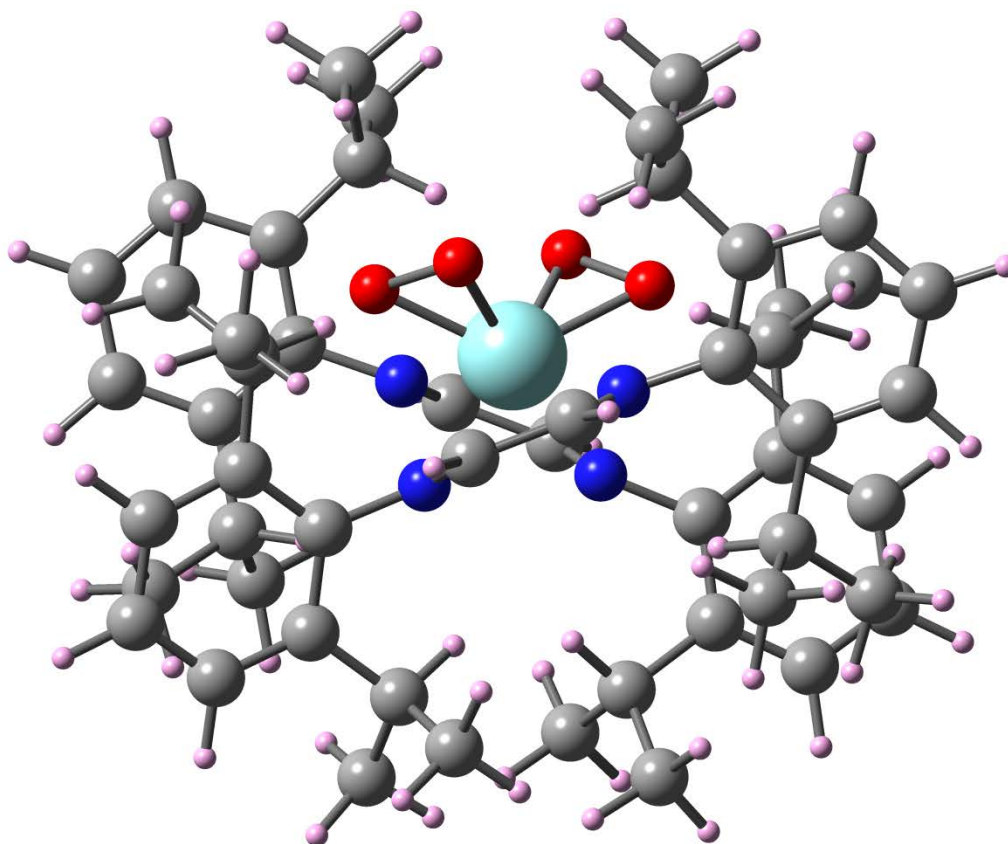

Fig. S16: NCCN Bisperoxo Complex (butterfly conformation)

| SCF          | E <sub>ZP</sub> | H            | G            |
|--------------|-----------------|--------------|--------------|
| -2591.026897 | -2589.880877    | -2589.811271 | -2589.986149 |

|   |             |             |             |
|---|-------------|-------------|-------------|
| O | -1.82084248 | 1.74427437  | 0.48594436  |
| N | 1.16402782  | -0.70599531 | -1.96860924 |
| N | -1.46449883 | 0.53293066  | -1.96245097 |
| N | 1.46539443  | 0.39792080  | 1.98650043  |
| N | -1.16225229 | -0.84058643 | 1.91979611  |
| C | 0.56117052  | -0.28171207 | -3.04104941 |
| C | -0.81237699 | 0.24747607  | -3.04617677 |
| C | 0.81448196  | 0.04522453  | 3.05105380  |
| C | -0.55864822 | -0.48303231 | 3.01573088  |
| C | 2.50093565  | -1.25514550 | -2.17309411 |
| C | 3.56186894  | -0.44152096 | -2.67200959 |
| C | 4.79802054  | -1.07485310 | -2.93292481 |
| C | 4.98124815  | -2.44894098 | -2.73461808 |
| C | 3.92275287  | -3.22774074 | -2.24271773 |
| C | 2.67382634  | -2.65086564 | -1.94433712 |
| C | 4.50196552  | 1.85992156  | -2.12273340 |

|   |             |             |             |
|---|-------------|-------------|-------------|
| C | 3.44944377  | 1.06585482  | -2.93812359 |
| C | 3.58931376  | 1.37707613  | -4.45347701 |
| C | -2.18160701 | 4.56082749  | -1.31231209 |
| C | -1.98087029 | 3.46000474  | -2.38443385 |
| C | -1.89546336 | 4.07407957  | -3.80800969 |
| C | -2.84366316 | 1.01416065  | -2.11924789 |
| C | -3.08465283 | 2.40042522  | -2.31278019 |
| C | -4.42590870 | 2.81214422  | -2.47329087 |
| C | -5.48368889 | 1.89563612  | -2.44731658 |
| C | -5.21646314 | 0.53005736  | -2.26716767 |
| C | -3.89793609 | 0.05958628  | -2.10256671 |
| C | 1.93765989  | -4.68998518 | -0.56771348 |
| C | 1.50443112  | -3.53599601 | -1.50267728 |
| C | 0.76241703  | -4.10224540 | -2.74687402 |
| C | -4.77366500 | -2.19909819 | -1.25216580 |
| C | -3.63046914 | -1.44549019 | -1.97075672 |
| C | -3.38785183 | -2.09326471 | -3.36420123 |
| C | 2.84557269  | 0.86535269  | 2.17589553  |
| C | 3.08796462  | 2.23527384  | 2.46168161  |
| C | 4.42880126  | 2.63203398  | 2.65887506  |
| C | 5.48482778  | 1.71652157  | 2.57859310  |
| C | 5.21645532  | 0.36700786  | 2.30352768  |
| C | 3.89795521  | -0.08827674 | 2.09990898  |
| C | 2.20166676  | 4.47236506  | 1.62486663  |
| C | 1.98404305  | 3.28783725  | 2.59968439  |
| C | 1.87531820  | 3.78269728  | 4.06744284  |
| C | -1.92640736 | -4.69580619 | 0.22397439  |
| C | -1.49621412 | -3.63169348 | 1.26127065  |
| C | -0.76931514 | -4.30886465 | 2.45767503  |
| C | -2.49695121 | -1.40520468 | 2.08954152  |
| C | -2.66632611 | -2.78238676 | 1.76623437  |
| C | -3.91268796 | -3.38257951 | 2.02803438  |
| C | -4.97256504 | -2.64206011 | 2.57311808  |
| C | -4.79336452 | -1.28374861 | 2.86323394  |
| C | -3.55946970 | -0.63054447 | 2.64437064  |
| C | 4.77576656  | -2.28636327 | 1.10530215  |
| C | 3.62731498  | -1.57970593 | 1.86227100  |
| C | 3.36730626  | -2.32214209 | 3.20403715  |
| C | -4.50886612 | 1.69991002  | 2.25583486  |
| C | -3.45096681 | 0.85573769  | 3.01171311  |
| C | -3.58658660 | 1.06173541  | 4.54530010  |
| H | 1.04174131  | -0.34699290 | -4.02082793 |
| H | -1.26459722 | 0.39050073  | -4.03097856 |
| H | 1.26860315  | 0.12591931  | 4.04202613  |
| H | -1.03712384 | -0.60947042 | 3.99051803  |
| H | 5.62411607  | -0.47535571 | -3.30541106 |
| H | 5.93958006  | -2.91065235 | -2.95983318 |
| H | 4.07126759  | -4.29283326 | -2.09417719 |
| H | 2.47756639  | 1.42974927  | -2.59996648 |
| H | -1.01421988 | 3.00197539  | -2.16836733 |
| H | 5.53091139  | 1.59961573  | -2.40845256 |
| H | 4.36791309  | 1.67931658  | -1.05226814 |

|   |             |             |             |
|---|-------------|-------------|-------------|
| H | 4.36356196  | 2.93484039  | -2.29553976 |
| H | 4.57533147  | 1.08357077  | -4.83874841 |
| H | 3.46964181  | 2.45490755  | -4.62290095 |
| H | 2.83182624  | 0.85431254  | -5.05485866 |
| H | -3.10805450 | 5.12961661  | -1.47533766 |
| H | -1.34136189 | 5.26665184  | -1.34657785 |
| H | -2.21108805 | 4.10591192  | -0.31734076 |
| H | -1.70627435 | 3.30559520  | -4.57111850 |
| H | -1.07530136 | 4.80253365  | -3.85003304 |
| H | -2.82383736 | 4.59372327  | -4.08185086 |
| H | -4.63596118 | 3.86873754  | -2.61574521 |
| H | -6.50840353 | 2.23897197  | -2.56822924 |
| H | -6.04187976 | -0.17427753 | -2.25121288 |
| H | 0.79186971  | -2.90495469 | -0.95464775 |
| H | -2.71754143 | -1.57683897 | -1.37214136 |
| H | 2.58763829  | -5.40889836 | -1.08187508 |
| H | 1.05980485  | -5.24556560 | -0.21867947 |
| H | 2.47494321  | -4.31423766 | 0.31118591  |
| H | 1.43239967  | -4.74224057 | -3.33610998 |
| H | 0.40555287  | -3.29819525 | -3.40262171 |
| H | -0.10497298 | -4.70233415 | -2.44285256 |
| H | -5.01587937 | -1.73858869 | -0.28921964 |
| H | -4.48090671 | -3.23893447 | -1.06475439 |
| H | -5.68480445 | -2.22556764 | -1.86403364 |
| H | -4.26943955 | -1.95970649 | -4.00479629 |
| H | -3.20210091 | -3.17120921 | -3.26070446 |
| H | -2.52976468 | -1.65206535 | -3.88529319 |
| H | 4.64008670  | 3.67584736  | 2.87488302  |
| H | 6.50930096  | 2.04819444  | 2.73027860  |
| H | 6.04097248  | -0.33609941 | 2.24398049  |
| H | 1.02168773  | 2.85082387  | 2.32834133  |
| H | -0.77482922 | -2.95932752 | 0.77811286  |
| H | 3.12539244  | 5.02574593  | 1.84614383  |
| H | 1.36131832  | 5.17463835  | 1.70381222  |
| H | 2.24471273  | 4.10014962  | 0.59653391  |
| H | 1.67773831  | 2.95350290  | 4.76179597  |
| H | 1.05248439  | 4.50357933  | 4.15784671  |
| H | 2.79869738  | 4.27909869  | 4.39625499  |
| H | -2.58126302 | -5.45654252 | 0.66726666  |
| H | -1.04800204 | -5.22017014 | -0.16882477 |
| H | -2.45795395 | -4.24115229 | -0.62045699 |
| H | -0.41306299 | -3.56644680 | 3.18288343  |
| H | 0.09641290  | -4.88729198 | 2.10955914  |
| H | -1.44887100 | -4.99196762 | 2.98396738  |
| H | -4.05841743 | -4.43603571 | 1.80902839  |
| H | -5.92894619 | -3.12098753 | 2.76879543  |
| H | -5.62099461 | -0.71310862 | 3.27580165  |
| H | 2.72087602  | -1.66496552 | 1.24557353  |
| H | -2.48160769 | 1.24527616  | 2.69568804  |
| H | 5.67952707  | -2.36055871 | 1.72417153  |
| H | 5.03108754  | -1.76061458 | 0.17992151  |
| H | 4.48055138  | -3.30886074 | 0.84169343  |



|    |             |             |             |
|----|-------------|-------------|-------------|
| H  | 3.17601357  | -3.38877128 | 3.02280082  |
| H  | 2.50677900  | -1.91272629 | 3.74628072  |
| H  | 4.24327491  | -2.24001211 | 3.86088960  |
| H  | -4.38121387 | 1.58995088  | 1.17497718  |
| H  | -4.37055327 | 2.76147749  | 2.49733817  |
| H  | -5.53579808 | 1.42013416  | 2.53013639  |
| H  | -2.82791512 | 0.49788268  | 5.10681155  |
| H  | -4.57181389 | 0.74243855  | 4.91189518  |
| H  | -3.46577831 | 2.12506502  | 4.78945749  |
| O  | 0.70706293  | 2.20368193  | -1.36002624 |
| O  | 1.81079676  | 1.79282040  | -0.36455411 |
| O  | -0.71865586 | 2.09972973  | 1.50413992  |
| Zr | -0.00158747 | 0.87055710  | 0.02702683  |

Oxo  $\eta^2$ -Ozone Complex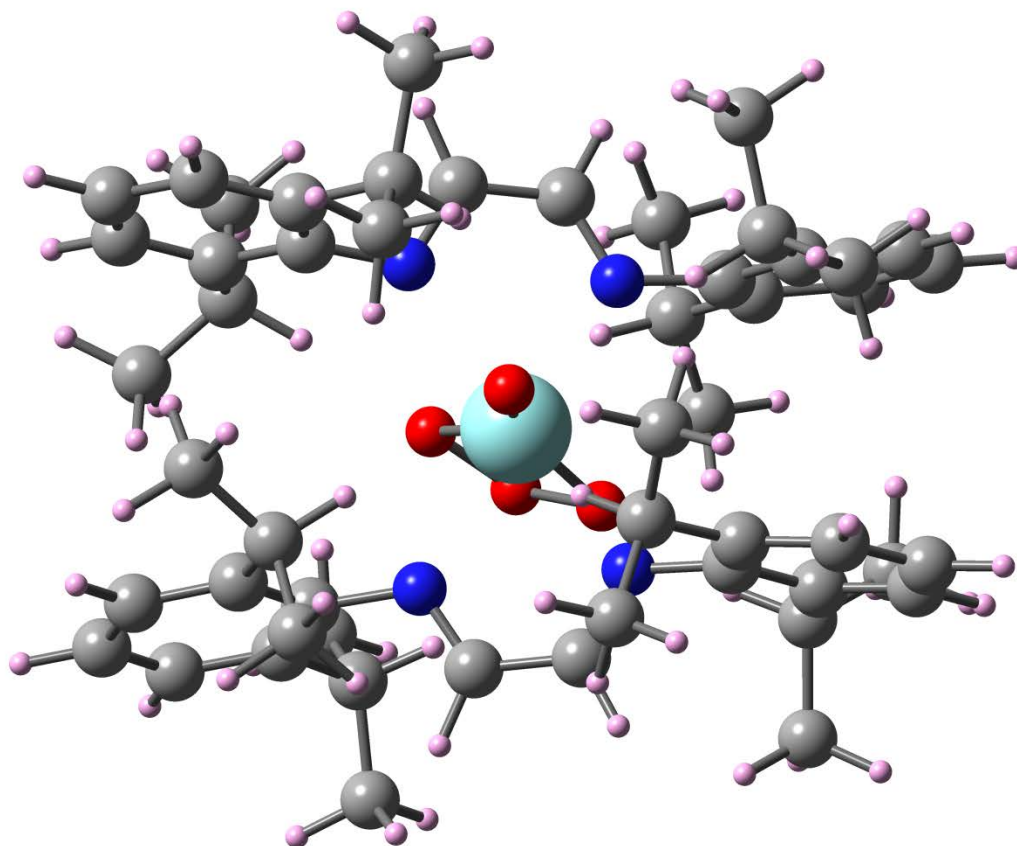Fig. S17: NCCN Oxo  $\eta^2$ -Ozone Complex

| SCF          | E <sub>ZP</sub> | H            | G            |
|--------------|-----------------|--------------|--------------|
| -2591.041807 | -2589.895510    | -2589.826724 | -2589.998526 |

|   |             |             |             |
|---|-------------|-------------|-------------|
| O | -1.12899390 | -0.08104716 | -2.01040667 |
| O | 1.08121303  | -1.04373914 | -1.72954601 |
| O | -0.11518967 | 0.46506235  | 1.64343635  |
| N | -1.27401738 | -2.11394623 | 0.17438477  |
| N | 1.43189926  | -1.86604143 | 0.88891293  |
| N | 1.28687888  | 1.87058730  | -0.96024495 |
| N | -1.42396143 | 2.08686783  | -0.27512493 |
| C | -0.57211890 | -3.14789314 | 0.53238928  |
| C | 0.82236952  | -3.00895468 | 0.96199077  |
| C | 0.61439758  | 2.96113837  | -1.19157037 |
| C | -0.77558601 | 3.10386666  | -0.75442004 |
| C | -2.68968590 | -2.34758837 | -0.11892672 |
| C | -3.62710407 | -2.02653599 | 0.90182050  |
| C | -4.98648859 | -2.30039058 | 0.64770600  |
| C | -5.39691980 | -2.87832822 | -0.56445127 |
| C | -4.44859708 | -3.18930981 | -1.54852989 |
| C | -3.07397404 | -2.93097938 | -1.35444445 |

|   |             |             |             |
|---|-------------|-------------|-------------|
| C | -4.20851570 | -0.55769838 | 2.93109486  |
| C | -3.17441867 | -1.49661236 | 2.26871413  |
| C | -2.86328816 | -2.68138595 | 3.22778540  |
| C | 1.87979793  | -0.03163292 | 4.71381869  |
| C | 1.65950688  | -1.21284672 | 3.73825612  |
| C | 1.25327165  | -2.48732538 | 4.52873512  |
| C | 2.77254211  | -1.80040415 | 1.47370832  |
| C | 2.88523613  | -1.49565326 | 2.85943022  |
| C | 4.17804976  | -1.51590620 | 3.42384945  |
| C | 5.30952512  | -1.81246770 | 2.64837984  |
| C | 5.16672770  | -2.09894371 | 1.28234951  |
| C | 3.89838921  | -2.10564700 | 0.66271407  |
| C | -2.47413802 | -2.70253953 | -3.82527793 |
| C | -2.07470468 | -3.30384833 | -2.45512899 |
| C | -1.91781643 | -4.84560889 | -2.55796646 |
| C | 4.85706031  | -1.88993385 | -1.70789704 |
| C | 3.75661226  | -2.50435784 | -0.81069108 |
| C | 3.75762578  | -4.05232739 | -0.95462810 |
| C | 2.69952528  | 1.88972590  | -1.35307527 |
| C | 3.05890222  | 1.70052264  | -2.71272891 |
| C | 4.42737318  | 1.81142838  | -3.04224773 |
| C | 5.39386052  | 2.09102720  | -2.06659192 |
| C | 5.00862834  | 2.26887315  | -0.72823517 |
| C | 3.65598424  | 2.17869312  | -0.34070304 |
| C | 2.42935323  | 0.16494610  | -4.65066773 |
| C | 2.03831779  | 1.41110146  | -3.81869483 |
| C | 1.85475965  | 2.64981695  | -4.73749193 |
| C | -1.76335043 | 2.54114898  | 3.88025357  |
| C | -1.62430181 | 3.16884494  | 2.47185880  |
| C | -1.36021769 | 4.69564886  | 2.57537343  |
| C | -2.75232593 | 2.35280435  | 0.27528474  |
| C | -2.84869086 | 2.88820161  | 1.59027590  |
| C | -4.13947481 | 3.19366945  | 2.07277566  |
| C | -5.28338903 | 2.97414093  | 1.29166188  |
| C | -5.15642084 | 2.44151373  | -0.00081507 |
| C | -3.89308673 | 2.12211051  | -0.54103933 |
| C | 4.28933361  | 2.04944038  | 2.14829134  |
| C | 3.23369680  | 2.47869210  | 1.10382484  |
| C | 2.92577949  | 3.99393354  | 1.27580100  |
| C | -4.88097625 | 0.65637099  | -2.40604910 |
| C | -3.76351117 | 1.64093984  | -1.98971931 |
| C | -3.73861385 | 2.85809381  | -2.95725001 |
| H | -5.72786312 | -2.06512551 | 1.40479976  |
| H | -6.45028093 | -3.08500671 | -0.73861815 |
| H | -4.77472842 | -3.63400158 | -2.48488906 |
| H | -2.24714335 | -0.92382959 | 2.13494497  |
| H | 0.83252915  | -0.90866561 | 3.08744149  |
| H | -5.11182361 | -1.09975612 | 3.24294327  |
| H | -4.50684221 | 0.25335061  | 2.25903320  |
| H | -3.77328112 | -0.10638049 | 3.83146801  |
| H | -3.76232090 | -3.29007731 | 3.39460096  |
| H | -2.52009552 | -2.30174654 | 4.19914318  |

|   |             |             |             |
|---|-------------|-------------|-------------|
| H | -2.08137110 | -3.34098749 | 2.83069764  |
| H | 2.65761826  | -0.24098042 | 5.46102698  |
| H | 0.94676463  | 0.17505757  | 5.25391923  |
| H | 2.15523387  | 0.87619164  | 4.16606933  |
| H | 1.03206275  | -3.33057687 | 3.86053451  |
| H | 0.35645882  | -2.29141425 | 5.13176146  |
| H | 2.05769077  | -2.80473957 | 5.20676250  |
| H | 4.29803006  | -1.29403356 | 4.48061761  |
| H | 6.29594548  | -1.82137206 | 3.10625590  |
| H | 6.04710411  | -2.32832976 | 0.68896350  |
| H | -1.10035562 | -2.87032790 | -2.21714382 |
| H | 2.79620432  | -2.13487963 | -1.18763720 |
| H | -3.43305634 | -3.09729047 | -4.18893936 |
| H | -1.70610724 | -2.94333156 | -4.57138003 |
| H | -2.53947712 | -1.61275195 | -3.75059273 |
| H | -2.86858741 | -5.32499567 | -2.82787311 |
| H | -1.58259088 | -5.28857441 | -1.60950959 |
| H | -1.17962113 | -5.09909321 | -3.33011137 |
| H | 4.90101367  | -0.80157158 | -1.59492743 |
| H | 4.63741656  | -2.11031691 | -2.76051907 |
| H | 5.85140542  | -2.30178160 | -1.48576914 |
| H | 4.70096121  | -4.48205428 | -0.58997738 |
| H | 3.63806686  | -4.33302511 | -2.00931015 |
| H | 2.93889126  | -4.51634836 | -0.38885680 |
| H | 4.73520116  | 1.67223953  | -4.07508710 |
| H | 6.44198232  | 2.17030045  | -2.34535304 |
| H | 5.76494035  | 2.48535608  | 0.01949250  |
| H | 1.07396281  | 1.17146938  | -3.36432771 |
| H | -0.75435491 | 2.67926547  | 2.02551272  |
| H | 3.37374493  | 0.30777611  | -5.19380623 |
| H | 1.64458632  | -0.04643877 | -5.38791410 |
| H | 2.51823266  | -0.70729534 | -3.99592577 |
| H | 1.51583429  | 3.53138203  | -4.17511409 |
| H | 1.10823859  | 2.43614774  | -5.51362942 |
| H | 2.79546892  | 2.91885498  | -5.23696375 |
| H | -2.61807066 | 2.94608666  | 4.43903335  |
| H | -0.85540570 | 2.74103102  | 4.46479147  |
| H | -1.87190462 | 1.45566372  | 3.79385490  |
| H | -1.20858424 | 5.15168844  | 1.58716932  |
| H | -0.46244504 | 4.88624167  | 3.17885369  |
| H | -2.20316361 | 5.21495772  | 3.05148134  |
| H | -4.24578174 | 3.60555039  | 3.07282228  |
| H | -6.26710712 | 3.21863470  | 1.68564078  |
| H | -6.04582991 | 2.27822130  | -0.60228175 |
| H | 2.31015721  | 1.92507172  | 1.32053260  |
| H | -2.81215025 | 1.10903546  | -2.10238057 |
| H | 5.19500032  | 2.66810428  | 2.08919532  |
| H | 4.57761868  | 1.00084183  | 2.02469301  |
| H | 3.87995830  | 2.17058452  | 3.15897828  |
| H | 2.60145906  | 4.20012226  | 2.30428294  |
| H | 2.13269989  | 4.33612606  | 0.59939262  |
| H | 3.82203241  | 4.59506178  | 1.07139646  |

|    |             |             |             |
|----|-------------|-------------|-------------|
| H  | -4.94847716 | -0.18719556 | -1.71073207 |
| H  | -4.66051400 | 0.25339209  | -3.40290565 |
| H  | -5.86533332 | 1.14244536  | -2.45860122 |
| H  | -2.91047012 | 3.54277404  | -2.73063169 |
| H  | -4.67438959 | 3.43047063  | -2.89296157 |
| H  | -3.61607042 | 2.51422507  | -3.99264292 |
| O  | -0.02736942 | -0.83209236 | -2.74939219 |
| H  | 1.30220489  | -3.89128472 | 1.39117196  |
| H  | -1.01636827 | -4.14426392 | 0.57669486  |
| H  | 1.08346026  | 3.81951908  | -1.67620962 |
| H  | -1.21867168 | 4.10091770  | -0.80266765 |
| Zr | -0.02639707 | -0.03253754 | -0.15053552 |

Oxo  $\eta^3$ -Ozone Complex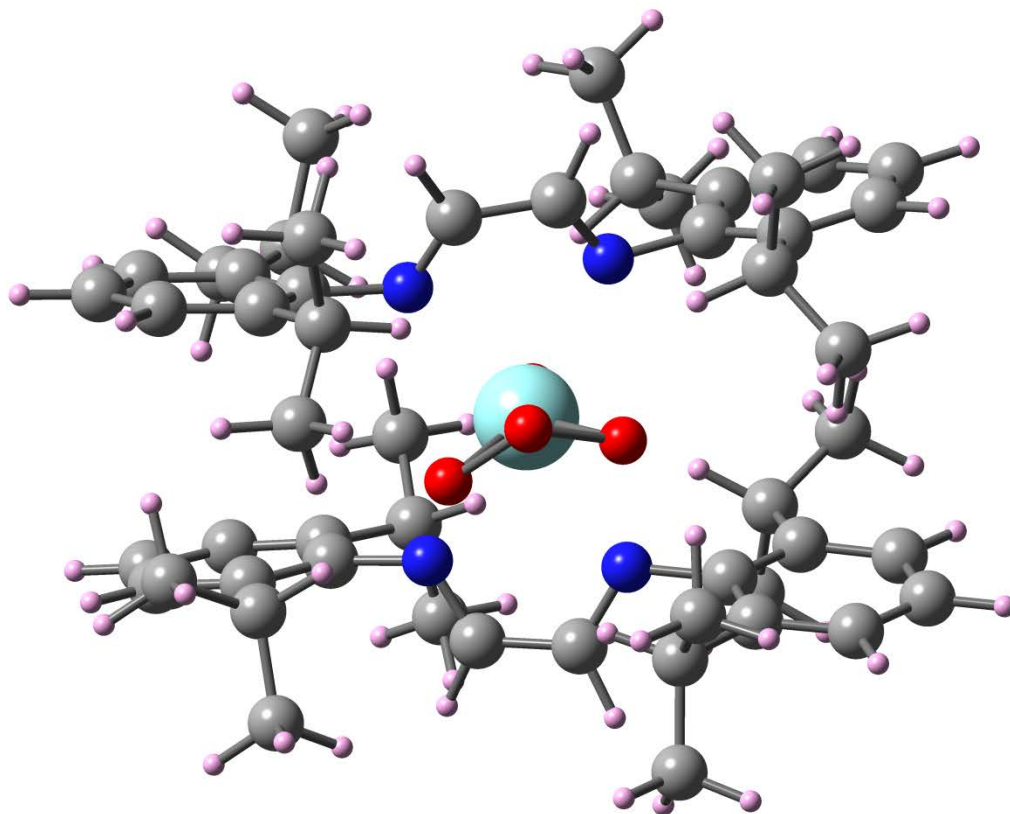Fig. S18: NCCN Oxo  $\eta^3$ -Ozone Complex

| SCF          | E <sub>ZP</sub> | H            | G            |
|--------------|-----------------|--------------|--------------|
| -2591.039977 | -2589.893496    | -2589.823926 | -2589.999310 |

|   |             |             |             |
|---|-------------|-------------|-------------|
| N | 1.37133800  | -2.07582400 | 0.39575000  |
| N | -1.36066900 | -2.06555600 | -0.19807300 |
| N | -1.42758900 | 2.06523000  | 0.06753300  |
| N | 1.32566800  | 2.13034300  | -0.44492800 |
| C | 0.78733600  | -3.15120900 | -0.03859100 |
| C | -0.63358100 | -3.12867500 | -0.39515000 |
| C | -0.81781100 | 3.17958900  | -0.19733100 |
| C | 0.59652800  | 3.19586600  | -0.57641400 |
| C | 2.72785800  | -2.19042000 | 0.92298600  |
| C | 3.83097800  | -2.40687000 | 0.05078500  |
| C | 5.10863400  | -2.53758500 | 0.63974100  |
| C | 5.28598000  | -2.47645500 | 2.02820500  |
| C | 4.17571900  | -2.28774500 | 2.86695500  |
| C | 2.87741000  | -2.14095300 | 2.34006100  |
| C | 4.66099800  | -1.58060900 | -2.22001200 |
| C | 3.69869300  | -2.53574500 | -1.47190600 |
| C | 3.93299300  | -4.00372700 | -1.92165200 |
| C | -2.73168700 | -1.73006500 | -4.13967900 |
| C | -2.36562500 | -2.70661600 | -2.99366400 |

|   |             |             |             |
|---|-------------|-------------|-------------|
| C | -2.42292000 | -4.17749200 | -3.48970100 |
| C | -2.78601200 | -2.18264100 | -0.46099000 |
| C | -3.26446700 | -2.50759700 | -1.76374300 |
| C | -4.65990500 | -2.65537000 | -1.92281400 |
| C | -5.54310600 | -2.49435400 | -0.84742100 |
| C | -5.04444000 | -2.18633600 | 0.42877300  |
| C | -3.66265700 | -2.03357000 | 0.65311600  |
| C | 1.91873700  | -1.22083500 | 4.54640500  |
| C | 1.66326800  | -2.05647800 | 3.27175700  |
| C | 1.19692400  | -3.48926200 | 3.65557700  |
| C | -4.09968400 | -1.14662100 | 3.03052800  |
| C | -3.11181500 | -1.84782400 | 2.07184800  |
| C | -2.71093600 | -3.22825500 | 2.66834800  |
| C | -2.78892300 | 2.18714800  | 0.58896400  |
| C | -2.95951300 | 2.47046600  | 1.97287800  |
| C | -4.28072000 | 2.63951300  | 2.44037000  |
| C | -5.38056300 | 2.52872000  | 1.57701700  |
| C | -5.17894200 | 2.25624400  | 0.21445700  |
| C | -3.88206300 | 2.08871500  | -0.31407100 |
| C | -1.95084400 | 1.87017500  | 4.25744900  |
| C | -1.77606700 | 2.65243300  | 2.93343800  |
| C | -1.54426400 | 4.16000000  | 3.22924500  |
| C | 2.52474000  | 1.33411100  | -4.40408400 |
| C | 2.15179100  | 2.37690500  | -3.32081400 |
| C | 2.05402500  | 3.79710200  | -3.94304700 |
| C | 2.73920000  | 2.23399100  | -0.78700800 |
| C | 3.13751100  | 2.36128800  | -2.14560600 |
| C | 4.51981900  | 2.48577600  | -2.40365200 |
| C | 5.46156100  | 2.48271500  | -1.36516900 |
| C | 5.03710000  | 2.36243800  | -0.03180500 |
| C | 3.67026100  | 2.24054800  | 0.28823700  |
| C | -4.79897100 | 1.11981200  | -2.51216900 |
| C | -3.66270500 | 1.90794400  | -1.82094400 |
| C | -3.50331400 | 3.29110300  | -2.51541700 |
| C | 4.20944400  | 1.58170100  | 2.71666200  |
| C | 3.19491300  | 2.22815300  | 1.74673000  |
| C | 2.87962400  | 3.67732300  | 2.21753700  |
| H | 1.30169200  | -4.11359200 | -0.07620200 |
| H | -1.07529800 | -4.06411700 | -0.74330200 |
| H | -1.31810500 | 4.14541800  | -0.09695400 |
| H | 1.02005200  | 4.14096900  | -0.92189800 |
| H | 5.97144600  | -2.69131500 | -0.00285400 |
| H | 6.28009400  | -2.58376400 | 2.45604200  |
| H | 4.31748800  | -2.25877400 | 3.94327700  |
| H | 2.69114500  | -2.23115300 | -1.76441600 |
| H | -1.33108600 | -2.47443300 | -2.72982900 |
| H | 5.71529800  | -1.82035200 | -2.02567900 |
| H | 4.48063300  | -0.54126900 | -1.92838200 |
| H | 4.49505500  | -1.66036600 | -3.30258800 |
| H | 4.95099500  | -4.33736200 | -1.67898900 |
| H | 3.79869400  | -4.09275100 | -3.00793400 |
| H | 3.23483300  | -4.69886800 | -1.43492500 |

|   |             |             |             |
|---|-------------|-------------|-------------|
| H | -3.77083200 | -1.85454100 | -4.47306200 |
| H | -2.07695500 | -1.90997800 | -5.00283400 |
| H | -2.57729900 | -0.69912600 | -3.80900500 |
| H | -2.13965800 | -4.89009800 | -2.70220700 |
| H | -1.73879600 | -4.31606800 | -4.33717200 |
| H | -3.43277200 | -4.44684700 | -3.82615800 |
| H | -5.05519400 | -2.89555600 | -2.90645100 |
| H | -6.61343400 | -2.61232000 | -0.99945000 |
| H | -5.73575200 | -2.07464800 | 1.25737800  |
| H | 0.85637000  | -1.54778000 | 2.73466200  |
| H | -2.20202200 | -1.23517500 | 2.01638600  |
| H | 2.65864700  | -1.68332000 | 5.21465300  |
| H | 0.98227800  | -1.12066800 | 5.11028900  |
| H | 2.25968800  | -0.21304300 | 4.28747200  |
| H | 1.97810100  | -4.01948500 | 4.21794600  |
| H | 0.95760900  | -4.09245100 | 2.76928400  |
| H | 0.29730600  | -3.44116600 | 4.28333700  |
| H | -4.45380100 | -0.19408300 | 2.62294200  |
| H | -3.60208700 | -0.94175200 | 3.98645900  |
| H | -4.97122100 | -1.77863400 | 3.24942300  |
| H | -3.59024000 | -3.88148100 | 2.75157500  |
| H | -2.28503100 | -3.09687300 | 3.67154300  |
| H | -1.96379400 | -3.74258000 | 2.05248300  |
| H | -4.44570300 | 2.86015000  | 3.49162700  |
| H | -6.38944000 | 2.66067600  | 1.96130700  |
| H | -6.03658900 | 2.18056700  | -0.44667600 |
| H | -0.88099800 | 2.22915200  | 2.46750600  |
| H | 1.16244000  | 2.08595700  | -2.95657700 |
| H | -2.82617900 | 2.20097200  | 4.83322800  |
| H | -1.06301600 | 2.01478100  | 4.88677900  |
| H | -2.04320400 | 0.79881600  | 4.05586100  |
| H | -1.37093200 | 4.73818000  | 2.31129400  |
| H | -0.66905800 | 4.28854000  | 3.88025400  |
| H | -2.41245500 | 4.60211000  | 3.73734500  |
| H | 3.49740900  | 1.54927600  | -4.86734000 |
| H | 1.76754500  | 1.33912600  | -5.19934200 |
| H | 2.54938400  | 0.33519600  | -3.96021700 |
| H | 1.74382200  | 4.55049300  | -3.20541100 |
| H | 1.32290200  | 3.80235800  | -4.76244000 |
| H | 3.02143700  | 4.11767100  | -4.35241300 |
| H | 4.85875200  | 2.57635600  | -3.43217200 |
| H | 6.52124300  | 2.57508600  | -1.59167700 |
| H | 5.77389100  | 2.36658000  | 0.76514800  |
| H | -2.73078300 | 1.34873700  | -1.97385800 |
| H | 2.26230700  | 1.65080600  | 1.80656500  |
| H | -5.73721100 | 1.69130300  | -2.53516100 |
| H | -4.98692400 | 0.16433300  | -2.01258600 |
| H | -4.52053700 | 0.90974200  | -3.55224500 |
| H | -3.33292500 | 3.15442900  | -3.59127900 |
| H | -2.65717500 | 3.86091700  | -2.11276400 |
| H | -4.40983000 | 3.89780600  | -2.38474500 |
| H | 4.48847400  | 0.57261200  | 2.39518700  |



|    |             |             |             |
|----|-------------|-------------|-------------|
| H  | 3.76565500  | 1.50784500  | 3.71759800  |
| H  | 5.12431800  | 2.18238300  | 2.81212700  |
| H  | 2.12087700  | 4.15893500  | 1.58811700  |
| H  | 3.78466900  | 4.29940100  | 2.18873200  |
| H  | 2.50264500  | 3.66639400  | 3.24873600  |
| O  | -0.90304500 | 0.09937500  | -1.99643200 |
| O  | 0.28136100  | -0.77282100 | -2.42275300 |
| O  | 1.50913100  | -0.23518100 | -1.71189400 |
| Zr | 0.09729400  | -0.00119200 | -0.05195600 |
| O  | 0.08694100  | 0.29128100  | 1.77353100  |

## 2.6 Structures with five oxygen atoms

### Peroxo Ozone Complex (conformation 1 lowest energy)

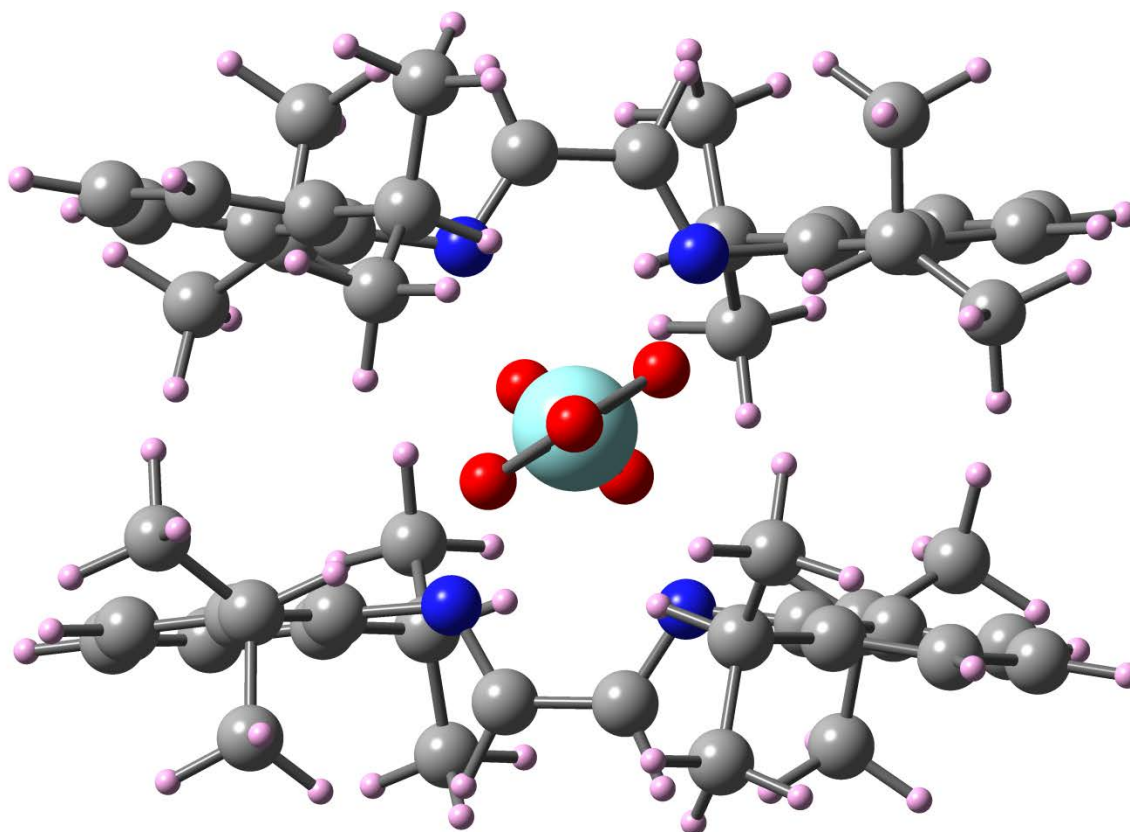

Fig. S19: NCCN Peroxo Ozone Complex (conformation 1 higher energy)

| SCF          | $E_{ZP}$     | H            | G            |
|--------------|--------------|--------------|--------------|
| -2666.214636 | -2665.064315 | -2664.994039 | -2665.168520 |

|   |             |             |             |
|---|-------------|-------------|-------------|
| O | -0.97629000 | 0.89741300  | -1.79560500 |
| O | 0.98752800  | -0.43280700 | -1.95864500 |
| O | 0.58779400  | 0.26195900  | 1.86174300  |
| O | -0.60095100 | -0.71272600 | 1.73718400  |
| N | -1.33562300 | -1.98045200 | -0.71285600 |
| N | 1.37029400  | -2.09738300 | 0.13229400  |
| N | 1.33988800  | 2.09141400  | -0.20626400 |
| N | -1.37017700 | 2.00157600  | 0.63746300  |
| C | -0.66646700 | -3.09311500 | -0.70322200 |
| C | 0.72341900  | -3.16012900 | -0.23111300 |
| C | 0.66863500  | 3.16794000  | 0.07064100  |
| C | -0.72089000 | 3.11925000  | 0.54517600  |
| C | -2.73911500 | -2.06142800 | -1.13602600 |
| C | -3.73329200 | -2.19528000 | -0.12685800 |
| C | -5.07463600 | -2.31246300 | -0.54574400 |

|   |             |             |             |
|---|-------------|-------------|-------------|
| C | -5.41577700 | -2.31021400 | -1.90728800 |
| C | -4.41244000 | -2.19265200 | -2.87865200 |
| C | -3.05268100 | -2.06480000 | -2.52070600 |
| C | -4.41782600 | -1.65530900 | 2.29326400  |
| C | -3.37269400 | -2.30828500 | 1.35933700  |
| C | -3.17816600 | -3.80021800 | 1.75316300  |
| C | 1.83588000  | -1.84488000 | 4.29443300  |
| C | 1.64668100  | -2.69026200 | 3.01081100  |
| C | 1.36772300  | -4.17592100 | 3.36895900  |
| C | 2.71736900  | -2.29594000 | 0.67843300  |
| C | 2.84817700  | -2.58509400 | 2.06413000  |
| C | 4.14820600  | -2.83037100 | 2.55599900  |
| C | 5.26898200  | -2.78494700 | 1.71443000  |
| C | 5.10767300  | -2.49750700 | 0.35032900  |
| C | 3.83286200  | -2.25191900 | -0.20205800 |
| C | -2.31335500 | -0.87889900 | -4.65805500 |
| C | -1.98892600 | -1.98108800 | -3.62003700 |
| C | -1.81283600 | -3.35782200 | -4.31695400 |
| C | 4.78809000  | -1.15223600 | -2.31915900 |
| C | 3.67215700  | -2.03365400 | -1.71037100 |
| C | 3.61456800  | -3.40132000 | -2.44765500 |
| C | 2.74237600  | 2.27911000  | -0.59750500 |
| C | 3.05431200  | 2.63271400  | -1.93643800 |
| C | 4.41262300  | 2.85825800  | -2.24966500 |
| C | 5.41635500  | 2.73627800  | -1.27948100 |
| C | 5.07731100  | 2.38903500  | 0.03769500  |
| C | 3.73758700  | 2.15858400  | 0.41238200  |
| C | 2.33146700  | 1.99642700  | -4.29920600 |
| C | 1.99226800  | 2.81096400  | -3.02660100 |
| C | 1.80413900  | 4.31410500  | -3.36925100 |
| C | -1.84181500 | 0.71905400  | 4.59914300  |
| C | -1.65277400 | 1.86509700  | 3.57487800  |
| C | -1.38375700 | 3.21154700  | 4.30178500  |
| C | -2.71730600 | 2.06328600  | 1.21402900  |
| C | -2.85137600 | 1.99922900  | 2.62785200  |
| C | -4.15255400 | 2.11375600  | 3.16248000  |
| C | -5.27173800 | 2.27903900  | 2.33397100  |
| C | -5.10718500 | 2.34146000  | 0.94185900  |
| C | -3.83084400 | 2.24193900  | 0.34834400  |
| C | 4.43522600  | 1.03309300  | 2.61784400  |
| C | 3.37802200  | 1.88530000  | 1.87807800  |
| C | 3.16098700  | 3.22424300  | 2.63878500  |
| C | -4.77134600 | 1.69024200  | -1.97749300 |
| C | -3.66904200 | 2.41178100  | -1.16648300 |
| C | -3.63893100 | 3.92155900  | -1.53723700 |
| H | -5.85707800 | -2.41232700 | 0.20016400  |
| H | -6.45672800 | -2.40458000 | -2.20741100 |
| H | -4.68309600 | -2.19782000 | -3.93104800 |
| H | -2.42214800 | -1.79213900 | 1.53304200  |
| H | 0.76326300  | -2.28040700 | 2.51390600  |
| H | -5.36666900 | -2.20901800 | 2.30045200  |
| H | -4.62350200 | -0.61953700 | 2.00429500  |

|   |             |             |             |
|---|-------------|-------------|-------------|
| H | -4.03630200 | -1.64796200 | 3.32207400  |
| H | -4.10623600 | -4.36787800 | 1.60041000  |
| H | -2.89791800 | -3.87801500 | 2.81177000  |
| H | -2.39025400 | -4.28347000 | 1.16090800  |
| H | 2.69091700  | -2.18153400 | 4.89703200  |
| H | 0.93624000  | -1.91899100 | 4.91958900  |
| H | 1.97477900  | -0.79115900 | 4.03188300  |
| H | 1.18211900  | -4.78343800 | 2.47193000  |
| H | 0.48425200  | -4.25042900 | 4.01704500  |
| H | 2.21747700  | -4.62483600 | 3.90131000  |
| H | 4.27895300  | -3.05838800 | 3.61049000  |
| H | 6.26095800  | -2.97623100 | 2.11702900  |
| H | 5.97889300  | -2.46971800 | -0.29753200 |
| H | -1.03379900 | -1.69731300 | -3.17275500 |
| H | 2.72475000  | -1.51649600 | -1.89594700 |
| H | -3.23468900 | -1.09317100 | -5.21711600 |
| H | -1.49164600 | -0.79905100 | -5.38086000 |
| H | -2.41620700 | 0.09053300  | -4.15992700 |
| H | -2.74349200 | -3.68035100 | -4.80313000 |
| H | -1.52355100 | -4.14250900 | -3.60376200 |
| H | -1.03196500 | -3.29481000 | -5.08618000 |
| H | 4.88247400  | -0.20104400 | -1.78419800 |
| H | 4.54581100  | -0.92647800 | -3.36573000 |
| H | 5.76574200  | -1.65386800 | -2.30954300 |
| H | 4.54272400  | -3.96956500 | -2.29594800 |
| H | 3.48025400  | -3.24358300 | -3.52585500 |
| H | 2.78112000  | -4.02247800 | -2.09311000 |
| H | 4.68124400  | 3.13019700  | -3.26676700 |
| H | 6.45590300  | 2.91337500  | -1.54505400 |
| H | 5.85984300  | 2.30198200  | 0.78517400  |
| H | 1.03867600  | 2.41880600  | -2.66621700 |
| H | -0.76559900 | 1.60041600  | 2.99339500  |
| H | 3.25502000  | 2.34609400  | -4.78049000 |
| H | 1.51526600  | 2.08992100  | -5.02661700 |
| H | 2.43889700  | 0.93556800  | -4.05090900 |
| H | 1.50599800  | 4.89952800  | -2.48799500 |
| H | 1.02520900  | 4.43267100  | -4.13390000 |
| H | 2.73202700  | 4.75408500  | -3.75914700 |
| H | -2.70941500 | 0.88115400  | 5.25336900  |
| H | -0.95059900 | 0.64396100  | 5.23613300  |
| H | -1.95974400 | -0.23464300 | 4.07501800  |
| H | -1.19998300 | 4.02897300  | 3.59020000  |
| H | -0.50200500 | 3.12234200  | 4.95035400  |
| H | -2.23681900 | 3.50524500  | 4.92867700  |
| H | -4.28568500 | 2.07153300  | 4.24012200  |
| H | -6.26476800 | 2.36319300  | 2.76927700  |
| H | -5.97719200 | 2.47549500  | 0.30562900  |
| H | 2.43560000  | 1.32754200  | 1.91305500  |
| H | -2.71334000 | 1.97496100  | -1.47437400 |
| H | 5.37515400  | 1.58203500  | 2.76709100  |
| H | 4.65739900  | 0.10779200  | 2.07640900  |
| H | 4.05613400  | 0.75904000  | 3.61044800  |

|    |             |             |             |
|----|-------------|-------------|-------------|
| H  | 2.88124300  | 3.02447500  | 3.68136700  |
| H  | 2.36437200  | 3.83018700  | 2.18813600  |
| H  | 4.07975000  | 3.82655900  | 2.63838600  |
| H  | -4.84543000 | 0.63377500  | -1.69808600 |
| H  | -4.53069500 | 1.73944600  | -3.04739300 |
| H  | -5.75817700 | 2.15416900  | -1.84129800 |
| H  | -2.81339600 | 4.44902000  | -1.04056100 |
| H  | -4.57498900 | 4.41722100  | -1.24508500 |
| H  | -3.51002200 | 4.04164300  | -2.62092400 |
| O  | 0.00580100  | 0.34823700  | -2.81672400 |
| H  | 1.17467600  | -4.15256500 | -0.16413100 |
| H  | -1.12739000 | -4.03104000 | -1.02008100 |
| H  | 1.12851400  | 4.15505500  | -0.01147500 |
| H  | -1.17091200 | 4.06573800  | 0.85304500  |
| Zr | 0.00065300  | 0.01063000  | -0.10865000 |

## Peroxo Ozone Complex (conformation 2 higher energy)

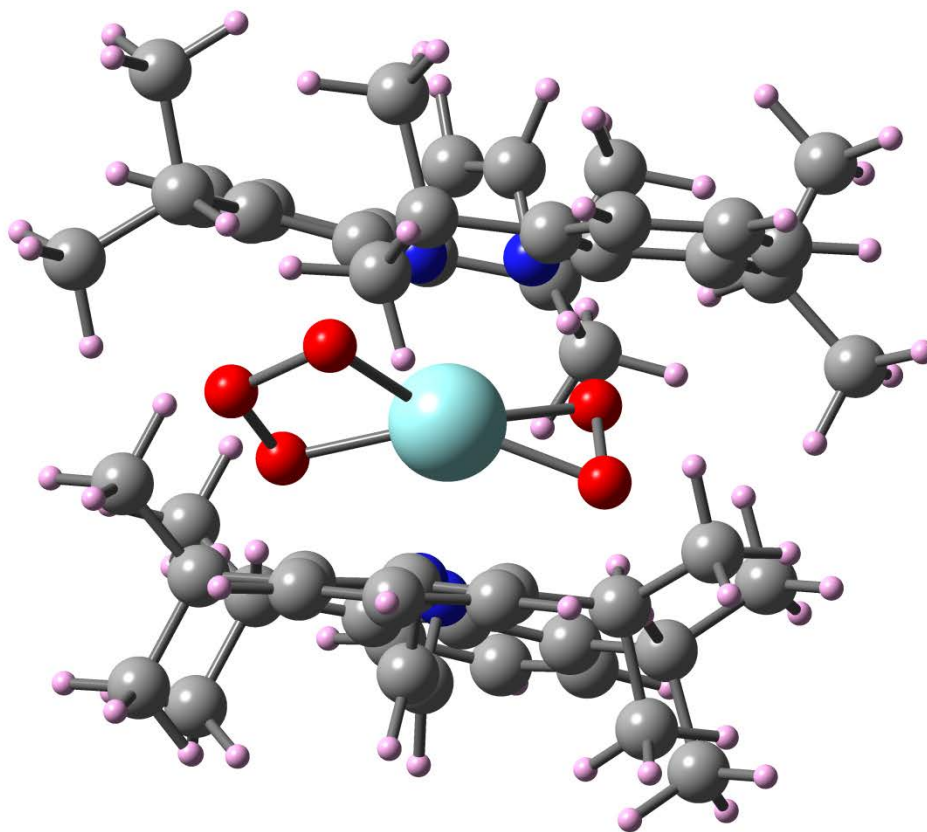

Fig. S20: NCCN Peroxo Ozone Complex (conformation 2 higher energy)

| SCF          | $E_{ZP}$     | H            | G            |
|--------------|--------------|--------------|--------------|
| -2666.214634 | -2665.064355 | -2664.994055 | -2665.168672 |

|   |             |             |             |
|---|-------------|-------------|-------------|
| O | -0.97713112 | 0.90063902  | -1.78965953 |
| O | 0.98955242  | -0.42523193 | -1.95586288 |
| O | 0.58905001  | 0.25635190  | 1.86598542  |
| O | -0.59881260 | -0.71913702 | 1.73838189  |
| N | -1.33259968 | -1.97859554 | -0.72103025 |
| N | 1.37290564  | -2.09817242 | 0.12527255  |
| N | 1.33624100  | 2.09446054  | -0.19747126 |
| N | -1.37364316 | 1.99705945  | 0.64641065  |
| C | -0.66135226 | -3.09001496 | -0.72078254 |
| C | 0.72819499  | -3.15869239 | -0.24813393 |
| C | 0.66349166  | 3.16888730  | 0.08368024  |
| C | -0.72589583 | 3.11606447  | 0.55844941  |
| C | -2.73585525 | -2.05897885 | -1.14464142 |
| C | -3.72969578 | -2.19769041 | -0.13574011 |
| C | -5.07099071 | -2.31546124 | -0.55448924 |
| C | -5.41264959 | -2.30893998 | -1.91592636 |

|   |             |             |             |
|---|-------------|-------------|-------------|
| C | -4.40981978 | -2.18604971 | -2.88708896 |
| C | -3.05007136 | -2.05761406 | -2.52916901 |
| C | -4.41447010 | -1.66919660 | 2.28683800  |
| C | -3.36818424 | -2.31581159 | 1.34983606  |
| C | -3.17015921 | -3.80898918 | 1.73749832  |
| C | 1.83938296  | -1.85611994 | 4.28575822  |
| C | 1.65134124  | -2.69990409 | 3.00106012  |
| C | 1.37498474  | -4.18667814 | 3.35685469  |
| C | 2.72040461  | -2.29897794 | 0.66938977  |
| C | 2.85238426  | -2.59150215 | 2.05426997  |
| C | 4.15267608  | -2.83810782 | 2.54455604  |
| C | 5.27281935  | -2.79093300 | 1.70216908  |
| C | 5.11043493  | -2.50011026 | 0.33900363  |
| C | 3.83516208  | -2.25288898 | -0.21191454 |
| C | -2.31538187 | -0.85943324 | -4.66111335 |
| C | -1.98748666 | -1.96629558 | -3.62913548 |
| C | -1.80936796 | -3.33890298 | -4.33370572 |
| C | 4.78263785  | -1.13335093 | -2.32168877 |
| C | 3.67453057  | -2.02938791 | -1.71963675 |
| C | 3.63192831  | -3.39380098 | -2.46367759 |
| C | 2.73802530  | 2.28495922  | -0.58964610 |
| C | 3.04801689  | 2.64474122  | -1.92749960 |
| C | 4.40579735  | 2.87191218  | -2.24166529 |
| C | 5.41098099  | 2.74588370  | -1.27347724 |
| C | 5.07387026  | 2.39327818  | 0.04272757  |
| C | 3.73474667  | 2.16078161  | 0.41830734  |
| C | 2.32127830  | 2.02400335  | -4.29391040 |
| C | 1.98412819  | 2.82909887  | -3.01482608 |
| C | 1.79418392  | 4.33440046  | -3.34712018 |
| C | -1.84451714 | 0.70170578  | 4.60382881  |
| C | -1.65709731 | 1.85098686  | 3.58291321  |
| C | -1.38989106 | 3.19580940  | 4.31334720  |
| C | -2.72117133 | 2.05479197  | 1.22261252  |
| C | -2.85566998 | 1.98601188  | 2.63610330  |
| C | -4.15718356 | 2.09756145  | 3.17054059  |
| C | -5.27623771 | 2.26401326  | 2.34205090  |
| C | -5.11128188 | 2.33068766  | 0.95016212  |
| C | -3.83458800 | 2.23434651  | 0.35692475  |
| C | 4.43575036  | 1.02681397  | 2.61831315  |
| C | 3.37736273  | 1.88163238  | 1.88341344  |
| C | 3.16108735  | 3.21772855  | 2.64941012  |
| C | -4.77482632 | 1.69066595  | -1.97095176 |
| C | -3.67179305 | 2.40802053  | -1.15733365 |
| C | -3.63846170 | 3.91853256  | -1.52428012 |
| H | -5.85293501 | -2.41910943 | 0.19144029  |
| H | -6.45352986 | -2.40394856 | -2.21607702 |
| H | -4.68070360 | -2.18720945 | -3.93941531 |
| H | -2.41867353 | -1.79835193 | 1.52516643  |
| H | 0.76707595  | -2.29121292 | 2.50474305  |
| H | -5.36139814 | -2.22622537 | 2.29314643  |
| H | -4.62405395 | -0.63318748 | 2.00137438  |
| H | -4.03196000 | -1.66375876 | 3.31527196  |

|   |             |             |             |
|---|-------------|-------------|-------------|
| H | -4.09694864 | -4.37799395 | 1.58208867  |
| H | -2.88997636 | -3.89048917 | 2.79584411  |
| H | -2.38086576 | -4.28803236 | 1.14364815  |
| H | 2.69526287  | -2.19212387 | 4.88746113  |
| H | 0.94010009  | -1.93274032 | 4.91111013  |
| H | 1.97620177  | -0.80176193 | 4.02469287  |
| H | 1.18860468  | -4.79248281 | 2.45879966  |
| H | 0.49265165  | -4.26347537 | 4.00622684  |
| H | 2.22614603  | -4.63566180 | 3.88691924  |
| H | 4.28418305  | -3.06882468 | 3.59835262  |
| H | 6.26509831  | -2.98347557 | 2.10341815  |
| H | 5.98120361  | -2.47093783 | -0.30943742 |
| H | -1.03251192 | -1.68275887 | -3.18143222 |
| H | 2.72267791  | -1.52031215 | -1.90454857 |
| H | -3.23847057 | -1.07145813 | -5.21811885 |
| H | -1.49596638 | -0.77630427 | -5.38616893 |
| H | -2.41688926 | 0.10777099  | -4.15844016 |
| H | -2.73969427 | -3.66039701 | -4.82122834 |
| H | -1.51823385 | -4.12709772 | -3.62517141 |
| H | -1.02910732 | -3.27012840 | -5.10305549 |
| H | 4.86383808  | -0.18285799 | -1.78341220 |
| H | 4.54177295  | -0.90718223 | -3.36850272 |
| H | 5.76610930  | -1.62341038 | -2.30967223 |
| H | 4.56576227  | -3.95324791 | -2.31418038 |
| H | 3.49684157  | -3.23222419 | -3.54120402 |
| H | 2.80485505  | -4.02545078 | -2.11269718 |
| H | 4.67289840  | 3.14826019  | -3.25796605 |
| H | 6.45012291  | 2.92421714  | -1.53980479 |
| H | 5.85746863  | 2.30346743  | 0.78875318  |
| H | 1.03169046  | 2.43354876  | -2.65521114 |
| H | -0.76954289 | 1.58906562  | 3.00074243  |
| H | 3.24393652  | 2.37722909  | -4.77441994 |
| H | 1.50379316  | 2.12312830  | -5.01914184 |
| H | 2.42909323  | 0.96126243  | -4.05409932 |
| H | 1.49704495  | 4.91384896  | -2.46162793 |
| H | 1.01390790  | 4.45740113  | -4.10970551 |
| H | 2.72120077  | 4.77743787  | -3.73564356 |
| H | -2.70998969 | 0.86225120  | 5.26125502  |
| H | -0.95158286 | 0.62347781  | 5.23804863  |
| H | -1.96496328 | -0.25007863 | 4.07675093  |
| H | -1.20596009 | 4.01502304  | 3.60387402  |
| H | -0.50882277 | 3.10558661  | 4.96268921  |
| H | -2.24393379 | 3.48743968  | 4.93990238  |
| H | -4.29077015 | 2.05222900  | 4.24801852  |
| H | -6.26948196 | 2.34590919  | 2.77730538  |
| H | -5.98115291 | 2.46592700  | 0.31401625  |
| H | 2.43520349  | 1.32343854  | 1.91743102  |
| H | -2.71654685 | 1.97031744  | -1.46567666 |
| H | 5.37555146  | 1.57552722  | 2.76912137  |
| H | 4.65772206  | 0.10410757  | 2.07236352  |
| H | 4.05770698  | 0.74809624  | 3.61000758  |
| H | 2.88394811  | 3.01417154  | 3.69195634  |



|    |             |             |             |
|----|-------------|-------------|-------------|
| H  | 2.36295794  | 3.82469589  | 2.20281117  |
| H  | 4.07947890  | 3.82059296  | 2.64880942  |
| H  | -4.85005090 | 0.63326933  | -1.69546864 |
| H  | -4.53392307 | 1.74345406  | -3.04061292 |
| H  | -5.76113715 | 2.15520427  | -1.83318634 |
| H  | -2.81387821 | 4.44355627  | -1.02352337 |
| H  | -4.57478103 | 4.41502080  | -1.23430237 |
| H  | -3.50563384 | 4.04095973  | -2.60724140 |
| O  | 0.00791800  | 0.35828923  | -2.81173518 |
| H  | 1.18131783  | -4.15082892 | -0.18983726 |
| H  | -1.12048883 | -4.02605429 | -1.04570062 |
| H  | 1.12171009  | 4.15704049  | 0.00494605  |
| H  | -1.17727640 | 4.06078891  | 0.86970813  |
| Zr | 0.00156855  | 0.01071502  | -0.10490546 |

## Catalyst Deformation Product with Oxygen Added to Ligand

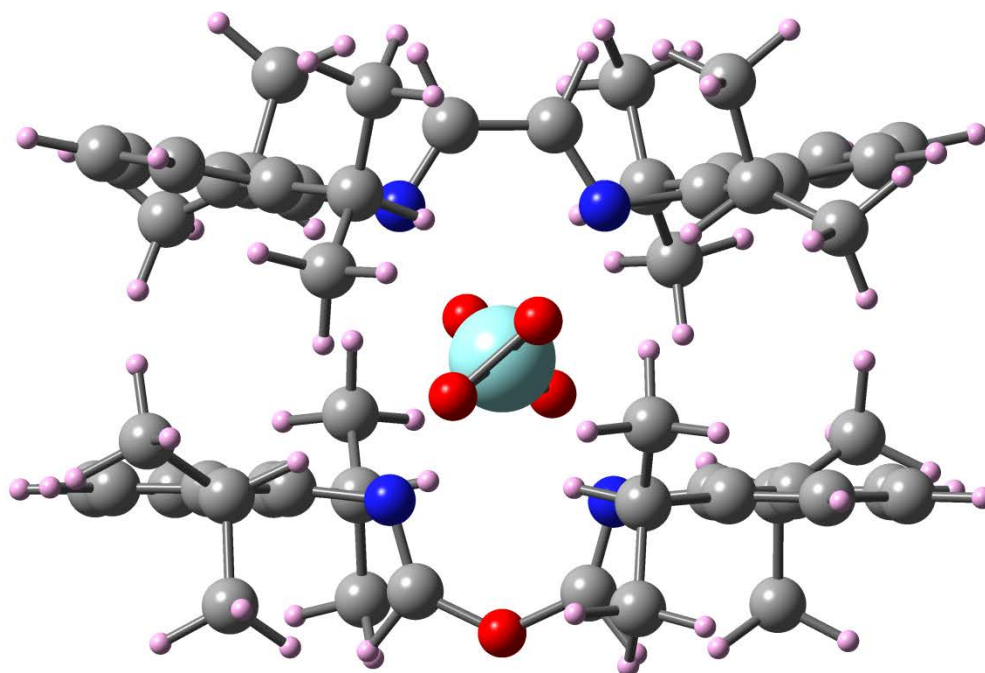

Fig. S21: NCCN Catalyst Deformation Product with Oxygen Added to Ligand

| SCF           | $E_{ZP}$     | H            | G            |
|---------------|--------------|--------------|--------------|
| -2666.2672403 | -2665.114415 | -2665.044749 | -2665.216971 |

|    |             |             |             |
|----|-------------|-------------|-------------|
| Zr | 0.00310500  | -0.01525500 | -0.16368700 |
| O  | -0.62524800 | 1.94140100  | 0.17165100  |
| O  | 0.53600100  | 1.87980600  | -0.84424500 |
| O  | 0.63640600  | -1.86317500 | 0.55619300  |
| O  | -0.51470100 | -2.01204600 | -0.46236400 |
| N  | -1.54404800 | 0.18247700  | -2.11587400 |
| N  | 1.55706500  | -0.57882100 | -2.04031600 |
| N  | 1.35583000  | 0.61451700  | 1.85602700  |
| N  | -1.36575100 | -0.24932300 | 1.93081200  |
| C  | -1.19422100 | 0.06119700  | -3.34444800 |
| C  | 1.21820600  | -0.65898000 | -3.27520300 |
| C  | 0.68168700  | 0.52976200  | 2.96031300  |
| C  | -0.69013200 | 0.01832700  | 3.00447500  |
| C  | -2.95751200 | 0.61668700  | -2.01458900 |
| C  | -3.95717800 | -0.38814500 | -1.91085100 |
| C  | -5.30379700 | 0.03136100  | -1.95235800 |
| C  | -5.63925900 | 1.38470500  | -2.11568700 |
| C  | -4.62846700 | 2.35022700  | -2.22544400 |
| C  | -3.26282800 | 1.99434100  | -2.17666500 |
| C  | -4.62052500 | -2.70258700 | -1.01360100 |
| C  | -3.60763800 | -1.88142600 | -1.84557800 |
| C  | -3.51549700 | -2.49129000 | -3.27422500 |
| C  | 2.36240100  | -4.46048200 | -0.56289400 |

|   |             |             |             |
|---|-------------|-------------|-------------|
| C | 2.17875900  | -3.47228300 | -1.74069300 |
| C | 2.15742800  | -4.23595300 | -3.09373900 |
| C | 2.96668200  | -0.99848100 | -1.85538600 |
| C | 3.26026000  | -2.38442800 | -1.75469200 |
| C | 4.62260900  | -2.75512000 | -1.73547000 |
| C | 5.64186200  | -1.79492500 | -1.80803000 |
| C | 5.31829600  | -0.43222300 | -1.90167400 |
| C | 3.97520800  | -0.00085000 | -1.94140800 |
| C | -2.38875800 | 4.26798800  | -1.39806800 |
| C | -2.19141400 | 3.07602200  | -2.36635800 |
| C | -2.17179400 | 3.57150400  | -3.83920000 |
| C | 4.63666600  | 2.43639200  | -1.46992800 |
| C | 3.64072800  | 1.48047400  | -2.16710100 |
| C | 3.59944800  | 1.80955100  | -3.68739400 |
| C | 2.70890200  | 1.16293100  | 1.99878600  |
| C | 2.88066300  | 2.57212200  | 1.99122300  |
| C | 4.18226300  | 3.06564900  | 2.22843600  |
| C | 5.26068900  | 2.19962100  | 2.45896300  |
| C | 5.05707700  | 0.81001800  | 2.46296100  |
| C | 3.77795200  | 0.25810100  | 2.24314900  |
| C | 1.99974200  | 4.59148900  | 0.68923800  |
| C | 1.71531500  | 3.55023000  | 1.79935200  |
| C | 1.37866900  | 4.25912000  | 3.14026300  |
| C | -2.02585200 | -4.35926400 | 1.49963700  |
| C | -1.74856800 | -3.14615200 | 2.42114400  |
| C | -1.44616500 | -3.61516100 | 3.87094400  |
| C | -2.72278000 | -0.75382700 | 2.16346100  |
| C | -2.90527400 | -2.13855500 | 2.41716700  |
| C | -4.21279200 | -2.57092400 | 2.72992200  |
| C | -5.28632200 | -1.67078800 | 2.78397200  |
| C | -5.07186600 | -0.30570300 | 2.53220000  |
| C | -3.78650900 | 0.18766600  | 2.22713600  |
| C | 4.75798400  | -2.08727900 | 1.86347400  |
| C | 3.54651200  | -1.25629800 | 2.34595900  |
| C | 3.20489200  | -1.66763000 | 3.80686200  |
| C | -4.74632200 | 2.44151100  | 1.44349600  |
| C | -3.54067900 | 1.69376800  | 2.05805100  |
| C | -3.18683800 | 2.35349400  | 3.42240400  |
| H | -1.85822600 | 0.26408200  | -4.18144100 |
| H | 1.88678700  | -1.00150600 | -4.06155600 |
| H | 1.11477400  | 0.84742900  | 3.91124600  |
| H | -1.12444600 | -0.12995500 | 3.99549500  |
| H | -6.09439500 | -0.70784000 | -1.86970700 |
| H | -6.68410500 | 1.68326700  | -2.16027000 |
| H | -4.89823600 | 3.39473300  | -2.35640500 |
| H | -2.62515200 | -1.98920500 | -1.36981900 |
| H | 1.20329900  | -3.00342900 | -1.58832200 |
| H | -5.58940700 | -2.79193300 | -1.52409400 |
| H | -4.78848800 | -2.25835000 | -0.02811100 |
| H | -4.23560200 | -3.71896800 | -0.86448900 |
| H | -4.47249900 | -2.38617300 | -3.80345700 |
| H | -3.27551900 | -3.56053300 | -3.20894400 |

|   |             |             |             |
|---|-------------|-------------|-------------|
| H | -2.73884300 | -2.01671100 | -3.88595700 |
| H | 3.31865400  | -4.99977200 | -0.61284500 |
| H | 1.55578500  | -5.20520200 | -0.58040500 |
| H | 2.29690700  | -3.92169000 | 0.38709200  |
| H | 1.97361200  | -3.56338600 | -3.94346500 |
| H | 1.36106000  | -4.99176400 | -3.08590800 |
| H | 3.11076300  | -4.74964000 | -3.27919400 |
| H | 4.88304200  | -3.80794800 | -1.66771900 |
| H | 6.68402100  | -2.10569000 | -1.79523000 |
| H | 6.11546500  | 0.30242100  | -1.95997000 |
| H | -1.21173200 | 2.65534100  | -2.12576700 |
| H | 2.64576800  | 1.68278400  | -1.75259700 |
| H | -3.34467400 | 4.78582400  | -1.55878800 |
| H | -1.58280600 | 4.99865600  | -1.54713100 |
| H | -2.33399900 | 3.92001500  | -0.36228000 |
| H | -3.13021500 | 4.02866000  | -4.12142000 |
| H | -1.97493700 | 2.75371700  | -4.54664800 |
| H | -1.38483200 | 4.32560000  | -3.97148800 |
| H | 4.75822300  | 2.19029800  | -0.41102700 |
| H | 4.26574100  | 3.46675800  | -1.53732500 |
| H | 5.62600200  | 2.41409300  | -1.94727400 |
| H | 4.56983800  | 1.59843600  | -4.15702500 |
| H | 3.37185300  | 2.87347700  | -3.83363900 |
| H | 2.83520300  | 1.23241500  | -4.22207600 |
| H | 4.34719300  | 4.13987900  | 2.23177500  |
| H | 6.25449100  | 2.60331300  | 2.63818200  |
| H | 5.89756800  | 0.14754500  | 2.64538300  |
| H | 0.83186000  | 2.99635600  | 1.46940400  |
| H | -0.85150700 | -2.66751600 | 2.01817600  |
| H | 2.87809100  | 5.21317400  | 0.91224800  |
| H | 1.13428600  | 5.25844400  | 0.58184100  |
| H | 2.14901700  | 4.08575900  | -0.26966300 |
| H | 1.12729900  | 3.53796900  | 3.93081200  |
| H | 0.51828500  | 4.92821800  | 3.00726100  |
| H | 2.22447100  | 4.86154800  | 3.49944200  |
| H | -2.93270500 | -4.90872000 | 1.78847500  |
| H | -1.17971000 | -5.05753800 | 1.54685200  |
| H | -2.11999100 | -4.02449800 | 0.46220900  |
| H | -1.19937400 | -2.77020500 | 4.52923000  |
| H | -0.59294300 | -4.30622000 | 3.87267800  |
| H | -2.30612900 | -4.13745600 | 4.31226000  |
| H | -4.38576400 | -3.62430900 | 2.93436300  |
| H | -6.28468100 | -2.02792800 | 3.02575200  |
| H | -5.90895100 | 0.38371500  | 2.58154600  |
| H | 2.68967500  | -1.52060400 | 1.71231600  |
| H | -2.68440000 | 1.83199900  | 1.38480200  |
| H | 5.60437800  | -2.01487000 | 2.56055800  |
| H | 5.09526100  | -1.76853600 | 0.87363000  |
| H | 4.47646400  | -3.14583100 | 1.79971000  |
| H | 3.05172800  | -2.75312000 | 3.86426200  |
| H | 2.29299000  | -1.18379400 | 4.17599300  |
| H | 4.02557300  | -1.40009300 | 4.48637000  |

|   |             |             |             |
|---|-------------|-------------|-------------|
| H | -5.09427000 | 1.95934200  | 0.52602100  |
| H | -4.45371200 | 3.46938800  | 1.19488500  |
| H | -5.58782400 | 2.50219700  | 2.14743300  |
| H | -2.27490600 | 1.93803400  | 3.86716900  |
| H | -4.00533700 | 2.21463200  | 4.14186300  |
| H | -3.02781100 | 3.43128400  | 3.28718500  |
| O | 0.01570800  | -0.33906700 | -3.86290400 |

## 2.7 Structures with six oxygen atoms

Bis- $\eta^2$ -ozone Complex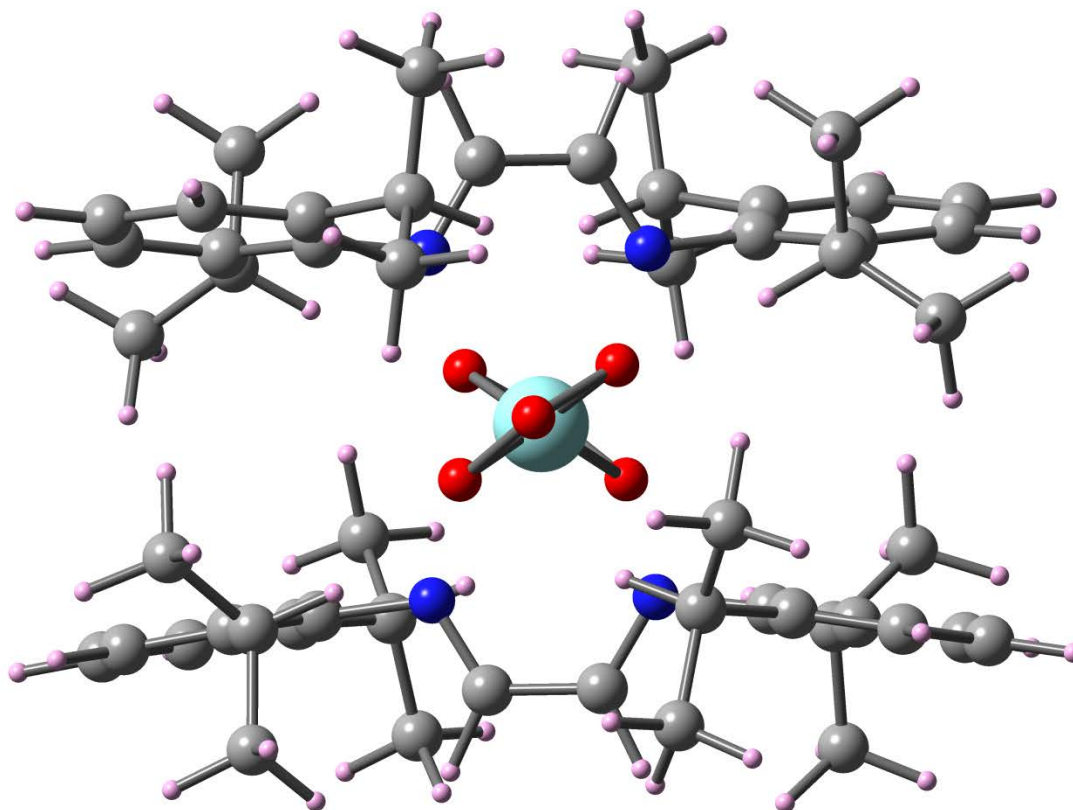Fig. S22: NCCN Bis- $\eta^2$ -ozone Complex

| SCF          | $E_{ZP}$     | H            | G            |
|--------------|--------------|--------------|--------------|
| -2741.352682 | -2740.199416 | -2740.128868 | -2740.303245 |

|    |             |             |             |
|----|-------------|-------------|-------------|
| Zr | 0.00041000  | 0.00320200  | 0.00858800  |
| O  | 0.85881600  | 0.55550600  | 1.87893700  |
| O  | -1.05787700 | -0.79271700 | 1.66486100  |
| O  | -0.84054300 | 0.80442300  | -1.78205300 |
| O  | 1.09141000  | -0.53887200 | -1.72149000 |
| N  | 1.34054500  | -2.13737400 | 0.38613200  |
| N  | -1.32438600 | -2.06178800 | -0.65999800 |
| N  | -1.36768500 | 2.04620700  | 0.61366200  |
| N  | 1.33817800  | 2.14053200  | -0.31231600 |
| C  | 0.69092500  | -3.21079400 | 0.05558600  |
| C  | -0.67636700 | -3.17168200 | -0.47851400 |
| C  | -0.71033000 | 3.15896500  | 0.48917200  |
| C  | 0.65810100  | 3.21116400  | -0.03588200 |
| C  | 2.71267300  | -2.33677500 | 0.88032600  |
| C  | 3.77848300  | -2.43362700 | -0.05804300 |

|   |             |             |             |
|---|-------------|-------------|-------------|
| C | 5.07366000  | -2.67589200 | 0.44931900  |
| C | 5.30601600  | -2.82901300 | 1.82325100  |
| C | 4.23323000  | -2.74978400 | 2.72233800  |
| C | 2.91709600  | -2.50559700 | 2.27696700  |
| C | 4.56178300  | -1.38631200 | -2.26130700 |
| C | 3.57338000  | -2.36134600 | -1.57578400 |
| C | 3.68608600  | -3.77852800 | -2.20270100 |
| C | -1.97884000 | -0.96602200 | -4.67433000 |
| C | -1.70856600 | -2.03590600 | -3.58938700 |
| C | -1.38444300 | -3.40910300 | -4.23967800 |
| C | -2.68934600 | -2.19316200 | -1.19546400 |
| C | -2.87279700 | -2.17386500 | -2.60457000 |
| C | -4.18085400 | -2.36520500 | -3.09761500 |
| C | -5.26466500 | -2.57081200 | -2.23244600 |
| C | -5.05319300 | -2.59629300 | -0.84645500 |
| C | -3.76720200 | -2.41472400 | -0.29310300 |
| C | 2.04692300  | -1.60637500 | 4.50816500  |
| C | 1.76705500  | -2.51581100 | 3.28791600  |
| C | 1.46117200  | -3.96937000 | 3.74315500  |
| C | -4.61785200 | -1.72186600 | 2.02549500  |
| C | -3.57591900 | -2.53897900 | 1.22314700  |
| C | -3.61997100 | -4.03271800 | 1.64992300  |
| C | -2.71684100 | 2.14137200  | 1.18338600  |
| C | -2.87258800 | 2.33441000  | 2.58427100  |
| C | -4.18975000 | 2.43506500  | 3.08422500  |
| C | -5.30332300 | 2.36121300  | 2.23757000  |
| C | -5.11893800 | 2.20073600  | 0.85575600  |
| C | -3.82953500 | 2.09364700  | 0.29663700  |
| C | -1.85127400 | 1.57051200  | 4.80273500  |
| C | -1.69814000 | 2.48288500  | 3.56057300  |
| C | -1.53864600 | 3.96512100  | 4.00000800  |
| C | 1.78025300  | 2.31596200  | -4.53289400 |
| C | 1.63434500  | 3.02401100  | -3.16291800 |
| C | 1.46366300  | 4.55517300  | -3.36842900 |
| C | 2.67956200  | 2.33526300  | -0.87244400 |
| C | 2.81937200  | 2.73559000  | -2.23102500 |
| C | 4.13049400  | 2.91312500  | -2.72513100 |
| C | 5.25408700  | 2.71612900  | -1.91211200 |
| C | 5.08568700  | 2.35448300  | -0.56671200 |
| C | 3.80292000  | 2.16386700  | -0.01484100 |
| C | -4.77451200 | 1.29374700  | -1.96074400 |
| C | -3.64646100 | 2.04963700  | -1.22325300 |
| C | -3.52782000 | 3.49440800  | -1.78731200 |
| C | 4.77276700  | 1.05857700  | 2.09960100  |
| C | 3.63803600  | 1.90911600  | 1.48607500  |
| C | 3.52852400  | 3.26437100  | 2.24205100  |
| H | 1.14401100  | -4.19918800 | 0.16185800  |
| H | -1.13035000 | -4.13402100 | -0.72575600 |
| H | -1.15939500 | 4.11205200  | 0.77590000  |
| H | 1.08382700  | 4.20513200  | -0.18806000 |
| H | 5.90444700  | -2.75467500 | -0.24649500 |
| H | 6.31240100  | -3.01859600 | 2.18898800  |

|   |             |             |             |
|---|-------------|-------------|-------------|
| H | 4.41383700  | -2.88584200 | 3.78510500  |
| H | 2.57383000  | -1.97333900 | -1.78496600 |
| H | -0.82227200 | -1.70008300 | -3.04808900 |
| H | 5.60405900  | -1.72422200 | -2.17919500 |
| H | 4.48919500  | -0.38319800 | -1.82778300 |
| H | 4.32089000  | -1.30844200 | -3.32948800 |
| H | 4.68492100  | -4.20717200 | -2.04285100 |
| H | 3.50712600  | -3.72838100 | -3.28497700 |
| H | 2.95431700  | -4.47485300 | -1.76985000 |
| H | -2.82597600 | -1.23326200 | -5.32086900 |
| H | -1.09221500 | -0.85482500 | -5.31100300 |
| H | -2.18018400 | 0.00479000  | -4.20915800 |
| H | -1.13021100 | -4.16628200 | -3.48471800 |
| H | -0.53012700 | -3.31182800 | -4.92250300 |
| H | -2.23911100 | -3.78951000 | -4.81550900 |
| H | -4.34609800 | -2.35820300 | -4.17147800 |
| H | -6.26435700 | -2.71729100 | -2.63458100 |
| H | -5.89358700 | -2.76756000 | -0.17947700 |
| H | 0.87127000  | -2.11430700 | 2.81173300  |
| H | -2.59734400 | -2.13458700 | 1.49461200  |
| H | 2.90322100  | -1.95620600 | 5.10113700  |
| H | 1.16818400  | -1.58935200 | 5.16520400  |
| H | 2.23902400  | -0.57900400 | 4.18087900  |
| H | 2.32727500  | -4.41967000 | 4.24685200  |
| H | 1.19984400  | -4.61473800 | 2.89280800  |
| H | 0.61728000  | -3.97568600 | 4.44546800  |
| H | -4.61393700 | -0.66928700 | 1.72279700  |
| H | -4.37291800 | -1.76451700 | 3.09469600  |
| H | -5.63728100 | -2.11356200 | 1.90388000  |
| H | -4.59003600 | -4.48616500 | 1.40420100  |
| H | -3.46643800 | -4.12147800 | 2.73357500  |
| H | -2.84144700 | -4.62473200 | 1.14890700  |
| H | -4.33892000 | 2.57232900  | 4.15155100  |
| H | -6.30720700 | 2.43835500  | 2.64846200  |
| H | -5.98430300 | 2.16509100  | 0.20143400  |
| H | -0.77777100 | 2.16806200  | 3.06345000  |
| H | 0.72049700  | 2.63073300  | -2.71187200 |
| H | -2.70497800 | 1.86350800  | 5.42903700  |
| H | -0.94698600 | 1.63392900  | 5.42206600  |
| H | -1.97698900 | 0.52713400  | 4.49814800  |
| H | -1.37422700 | 4.63340200  | 3.14339800  |
| H | -0.68265900 | 4.06882500  | 4.68003200  |
| H | -2.43463900 | 4.32052300  | 4.52637700  |
| H | 2.62191800  | 2.71335200  | -5.11607000 |
| H | 0.86709100  | 2.46373400  | -5.12426200 |
| H | 1.92109900  | 1.23986100  | -4.39460200 |
| H | 1.30168300  | 5.08326300  | -2.41859200 |
| H | 0.60288900  | 4.75626800  | -4.02005200 |
| H | 2.35435600  | 4.99228300  | -3.83929800 |
| H | 4.26703100  | 3.20891500  | -3.76157900 |
| H | 6.25307900  | 2.85453500  | -2.31882200 |
| H | 5.95856800  | 2.22640200  | 0.06572100  |



|   |             |             |             |
|---|-------------|-------------|-------------|
| H | -2.70696300 | 1.53638900  | -1.45470800 |
| H | 2.70061900  | 1.36993500  | 1.65769600  |
| H | -5.72812100 | 1.83901800  | -1.92705300 |
| H | -4.93234500 | 0.29487500  | -1.54061800 |
| H | -4.50440700 | 1.17379500  | -3.01743400 |
| H | -3.36404900 | 3.46169500  | -2.87223500 |
| H | -2.68909300 | 4.04294600  | -1.33957000 |
| H | -4.44576600 | 4.06655500  | -1.59369600 |
| H | 4.92369100  | 0.12672000  | 1.54441600  |
| H | 4.51378400  | 0.79422800  | 3.13259000  |
| H | 5.72710500  | 1.60261400  | 2.13079500  |
| H | 2.68179800  | 3.86503900  | 1.88505800  |
| H | 4.44267500  | 3.85966400  | 2.11096000  |
| H | 3.38329100  | 3.08579400  | 3.31537100  |
| O | -0.19835100 | -0.13220500 | 2.72207800  |
| O | 0.24916000  | 0.26352300  | -2.68996800 |

Bis- $\eta^3$ -ozone Complex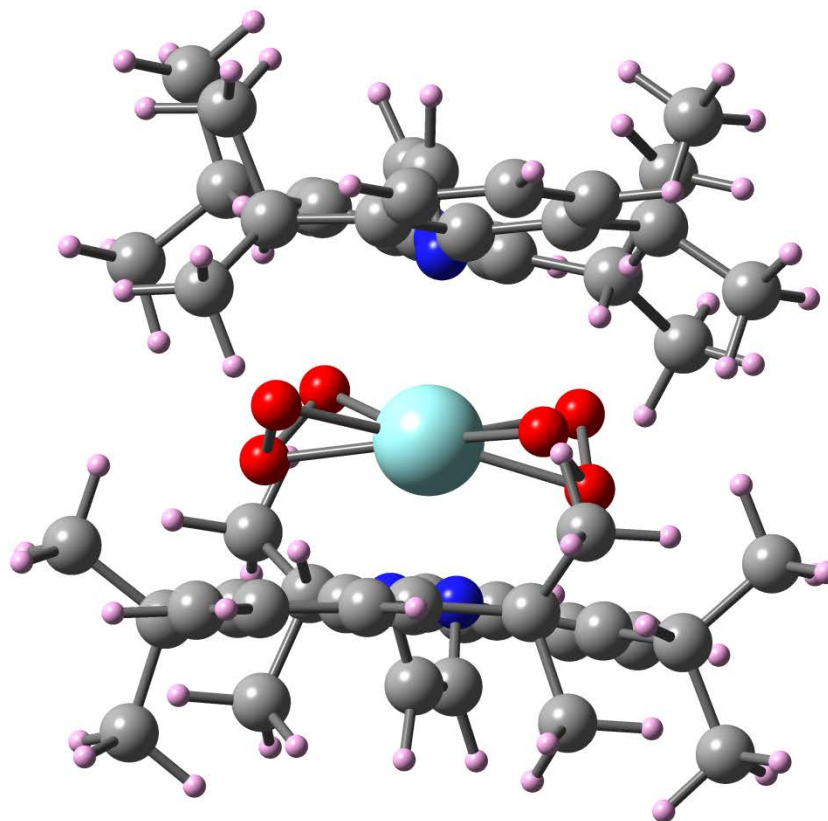Fig. S23: NCCN Bis- $\eta^3$ -ozone Complex

| SCF          | $E_{ZP}$     | H            | G            |
|--------------|--------------|--------------|--------------|
| -2741.332603 | -2740.180866 | -2740.109119 | -2740.288689 |

|   |             |             |             |
|---|-------------|-------------|-------------|
| N | -0.65384186 | -2.48223619 | -0.02280172 |
| N | 2.04885781  | -1.95006928 | 0.46789565  |
| N | 0.63925263  | 2.32071278  | -0.41377451 |
| N | -2.32458496 | 2.04097152  | -0.01090457 |
| C | 0.21948550  | -3.44153769 | 0.00493964  |
| C | 1.63184165  | -3.16682392 | 0.31875649  |
| C | -0.23265439 | 3.26750794  | -0.22452830 |
| C | -1.63718729 | 3.12024069  | 0.17793291  |
| C | -2.03034780 | -2.84740930 | -0.35420047 |
| C | -2.99235940 | -2.83641155 | 0.69415634  |
| C | -4.31030625 | -3.22008407 | 0.37933615  |
| C | -4.66255601 | -3.61172824 | -0.92185525 |
| C | -3.69193198 | -3.63130760 | -1.93137782 |
| C | -2.35408521 | -3.25714214 | -1.67857503 |
| C | -3.71067235 | -1.87165361 | 2.96534396  |
| C | -2.58965735 | -2.54287924 | 2.14176490  |

|   |             |             |             |
|---|-------------|-------------|-------------|
| C | -2.12667076 | -3.85198030 | 2.84291121  |
| C | 2.75491434  | -0.84084435 | 4.47090155  |
| C | 2.70600756  | -1.89984882 | 3.34393861  |
| C | 2.87583533  | -3.33150236 | 3.92597615  |
| C | 3.44742857  | -1.73837033 | 0.85964528  |
| C | 3.74904286  | -1.65404030 | 2.24740136  |
| C | 5.09236200  | -1.42552203 | 2.60885600  |
| C | 6.09796196  | -1.29966172 | 1.63911089  |
| C | 5.77717657  | -1.43195665 | 0.28139280  |
| C | 4.45074734  | -1.66238257 | -0.14405805 |
| C | -1.79349684 | -2.43455510 | -4.02966257 |
| C | -1.34850798 | -3.31870372 | -2.83650585 |
| C | -1.11771088 | -4.78490685 | -3.29396768 |
| C | 4.78916802  | -0.79737208 | -2.53108378 |
| C | 4.17701057  | -1.89992013 | -1.63387855 |
| C | 4.69370514  | -3.30337249 | -2.05623675 |
| C | 1.94453221  | 2.78642108  | -0.92312352 |
| C | 2.12199811  | 2.85876869  | -2.33373297 |
| C | 3.36189576  | 3.32582253  | -2.81427999 |
| C | 4.38656803  | 3.71240115  | -1.93651400 |
| C | 4.17490919  | 3.65889086  | -0.55245107 |
| C | 2.95133907  | 3.20420853  | -0.01213408 |
| C | 1.48238715  | 1.69169215  | -4.52673962 |
| C | 0.99612044  | 2.52891433  | -3.32008450 |
| C | 0.30954602  | 3.83537003  | -3.80830177 |
| C | -3.24463583 | 1.86157467  | 4.11353155  |
| C | -3.16301155 | 2.74476061  | 2.84291711  |
| C | -3.44283596 | 4.23084639  | 3.19682835  |
| C | -3.68079912 | 1.92621434  | 0.40777408  |
| C | -4.10661992 | 2.25342946  | 1.73427140  |
| C | -5.47125925 | 2.06756427  | 2.04340768  |
| C | -6.38301631 | 1.58604282  | 1.09308109  |
| C | -5.94111430 | 1.25303580  | -0.19964794 |
| C | -4.59158175 | 1.40403935  | -0.56342904 |
| C | 3.90863724  | 2.61277289  | 2.29042859  |
| C | 2.74014301  | 3.25795380  | 1.50558316  |
| C | 2.52391712  | 4.72540373  | 1.96849260  |
| C | -4.92420046 | 0.02310926  | -2.71038188 |
| C | -4.10045415 | 1.10716417  | -1.98202957 |
| C | -4.07477379 | 2.41173056  | -2.82899034 |
| H | -0.06358766 | -4.47996404 | -0.17768303 |
| H | 2.29868526  | -4.02195994 | 0.44511613  |
| H | 0.07742366  | 4.30679820  | -0.37809382 |
| H | -2.08218363 | 4.03578156  | 0.58675191  |
| H | -5.06491775 | -3.21772625 | 1.15923323  |
| H | -5.68580163 | -3.90470903 | -1.14419627 |
| H | -3.97169971 | -3.93774601 | -2.93584977 |
| H | -1.74673327 | -1.84643647 | 2.12435939  |
| H | 1.70745023  | -1.83312079 | 2.90465934  |
| H | -4.55302665 | -2.55298976 | 3.14713126  |
| H | -4.08955396 | -0.97521293 | 2.46242417  |
| H | -3.31740112 | -1.57277855 | 3.94509146  |

|   |             |             |             |
|---|-------------|-------------|-------------|
| H | -2.94679970 | -4.58141365 | 2.88680943  |
| H | -1.80389113 | -3.63725587 | 3.87008699  |
| H | -1.28610923 | -4.32614594 | 2.31844904  |
| H | 3.70618031  | -0.86281322 | 5.01934796  |
| H | 1.95142473  | -1.03196038 | 5.19441596  |
| H | 2.60555903  | 0.15837547  | 4.05178574  |
| H | 2.79327272  | -4.10219128 | 3.14648694  |
| H | 2.10543409  | -3.52833819 | 4.68336586  |
| H | 3.85827057  | -3.44894133 | 4.40216434  |
| H | 5.35118883  | -1.34962768 | 3.66111665  |
| H | 7.12628967  | -1.11591926 | 1.94090283  |
| H | 6.56454908  | -1.36074598 | -0.46380270 |
| H | -0.38744369 | -2.91531050 | -2.50760837 |
| H | 3.09942188  | -1.86289759 | -1.80521056 |
| H | -2.74888418 | -2.77122625 | -4.45373463 |
| H | -1.03852787 | -2.47738168 | -4.82586193 |
| H | -1.88992157 | -1.39311597 | -3.70840700 |
| H | -2.04289308 | -5.23359448 | -3.67832520 |
| H | -0.76181020 | -5.42051846 | -2.47077036 |
| H | -0.37047697 | -4.81668936 | -4.09781935 |
| H | 4.40324151  | 0.18724717  | -2.24934076 |
| H | 4.51487960  | -0.97833269 | -3.57878264 |
| H | 5.88581348  | -0.77863913 | -2.47267312 |
| H | 5.78054864  | -3.38388439 | -1.92113369 |
| H | 4.46960581  | -3.48645714 | -3.11554545 |
| H | 4.22794794  | -4.10511859 | -1.46557906 |
| H | 3.52546396  | 3.38724277  | -3.88660365 |
| H | 5.33733878  | 4.06529835  | -2.32976146 |
| H | 4.96333883  | 3.98109228  | 0.12231350  |
| H | 0.24970706  | 1.92087570  | -2.80225814 |
| H | -2.12952726 | 2.66060781  | 2.49477989  |
| H | 2.17342042  | 2.25234632  | -5.17134912 |
| H | 0.62251485  | 1.39751341  | -5.14339128 |
| H | 1.98082609  | 0.78309668  | -4.17531459 |
| H | -0.09940845 | 4.41982472  | -2.97260888 |
| H | -0.51809130 | 3.59752137  | -4.49001481 |
| H | 1.02032872  | 4.47805598  | -4.34583528 |
| H | -4.24600203 | 1.87186099  | 4.56358188  |
| H | -2.53568202 | 2.22921299  | 4.86753551  |
| H | -2.97822778 | 0.82824922  | 3.87381342  |
| H | -3.35323972 | 4.88621121  | 2.31974510  |
| H | -2.73562844 | 4.58162847  | 3.96048204  |
| H | -4.45844918 | 4.35615724  | 3.59514024  |
| H | -5.82263247 | 2.30097632  | 3.04556747  |
| H | -7.43079932 | 1.46462238  | 1.35861510  |
| H | -6.65274224 | 0.86964713  | -0.92431868 |
| H | 1.84431489  | 2.68512501  | 1.75930847  |
| H | -3.06479205 | 0.75260926  | -1.90024285 |
| H | 4.84776446  | 3.16842740  | 2.16361545  |
| H | 4.07308524  | 1.57821148  | 1.97056818  |
| H | 3.67222858  | 2.60028133  | 3.36268113  |
| H | 2.34128956  | 4.75950795  | 3.05107323  |

|    |             |             |             |
|----|-------------|-------------|-------------|
| H  | 1.66466767  | 5.18830316  | 1.46423946  |
| H  | 3.40638503  | 5.34323762  | 1.75316679  |
| H  | -4.99308389 | -0.89461177 | -2.11534614 |
| H  | -4.43909240 | -0.22813865 | -3.66243420 |
| H  | -5.94203978 | 0.36639410  | -2.94297113 |
| H  | -3.44644261 | 3.18162760  | -2.36517043 |
| H  | -5.08814932 | 2.82107733  | -2.94392225 |
| H  | -3.67222751 | 2.20582767  | -3.82972386 |
| O  | 1.33950130  | 0.58780944  | 1.83068934  |
| O  | -0.68327711 | -0.12376964 | -1.84244591 |
| O  | 0.62961686  | -0.90639988 | -2.06684707 |
| O  | 0.16474546  | -0.30815551 | 2.20250238  |
| O  | -1.04393364 | 0.35547354  | 1.50400916  |
| Zr | 0.40434263  | -0.15618505 | 0.00897817  |
| O  | 1.74499287  | 0.06766855  | -1.68187396 |

$\eta^2$ -Ozone  $\eta^3$ -Ozone Complex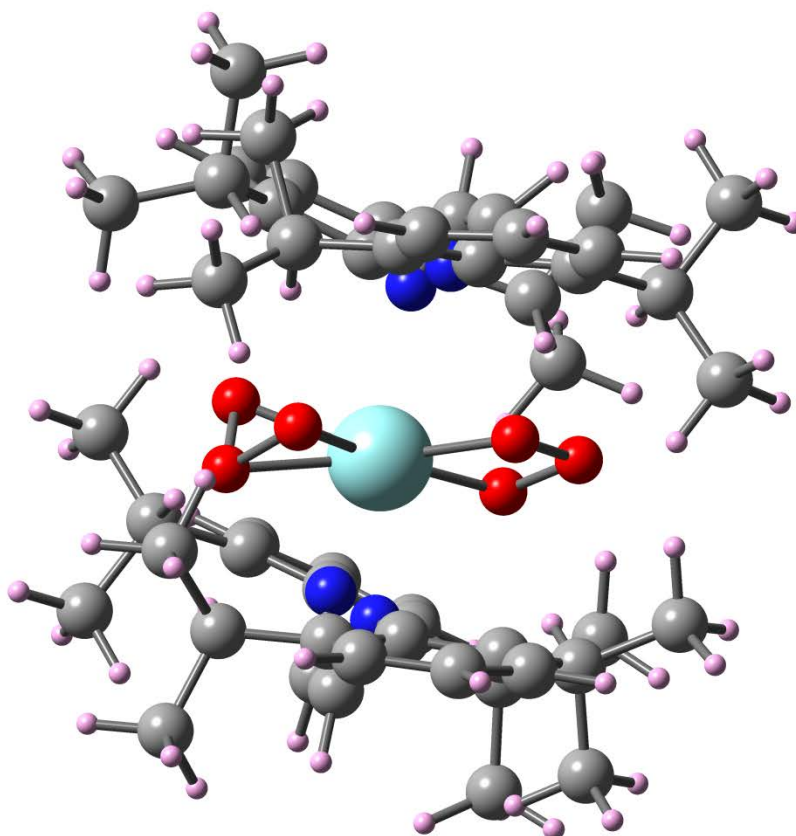Fig. S24: NCCN  $\eta^2$ -Ozone- $\eta^3$ -Ozone Complex

| SCF          | E <sub>ZP</sub> | H            | G            |
|--------------|-----------------|--------------|--------------|
| -2741.334467 | -2740.182259    | -2740.110561 | -2740.290254 |

|   |             |             |             |
|---|-------------|-------------|-------------|
| N | 2.44673302  | -1.54304147 | -0.66254095 |
| N | -0.15941061 | -2.50340799 | -0.75087785 |
| N | -2.70399251 | 1.75907660  | 0.51766562  |
| N | 0.34773580  | 2.13375306  | 0.67075832  |
| C | 2.19448248  | -2.73458587 | -1.11730321 |
| C | 0.81252669  | -3.21682056 | -1.23170112 |
| C | -2.03894402 | 2.42111421  | 1.40709130  |
| C | -0.62101167 | 2.78367781  | 1.25197733  |
| C | 3.83824592  | -1.24009719 | -0.31764478 |
| C | 4.60459709  | -0.40507775 | -1.17701922 |
| C | 5.92849697  | -0.11070738 | -0.79417112 |
| C | 6.47866335  | -0.63368626 | 0.38604518  |
| C | 5.71645581  | -1.48972631 | 1.19248834  |
| C | 4.38547003  | -1.82591614 | 0.86245488  |
| C | 4.55410608  | 1.45956170  | -2.95057503 |
| C | 4.06782550  | 0.05244529  | -2.53536026 |

|   |             |             |             |
|---|-------------|-------------|-------------|
| C | 4.44163472  | -0.99100849 | -3.62632077 |
| C | -2.61997880 | -1.64058491 | -4.04060131 |
| C | -1.69581575 | -2.66074747 | -3.33244622 |
| C | -1.43848122 | -3.89392969 | -4.24254052 |
| C | -1.50944738 | -3.05653374 | -0.76438807 |
| C | -2.25229329 | -3.10430758 | -1.97367006 |
| C | -3.56331774 | -3.62425437 | -1.90419775 |
| C | -4.10287189 | -4.08873260 | -0.69706130 |
| C | -3.32722373 | -4.06779051 | 0.47357955  |
| C | -2.01485732 | -3.55842607 | 0.46711807  |
| C | 3.67245705  | -2.44530775 | 3.25177324  |
| C | 3.63651910  | -2.82981016 | 1.75261566  |
| C | 4.20601212  | -4.26130286 | 1.54642211  |
| C | -1.85878406 | -3.42559615 | 3.03547457  |
| C | -1.11874911 | -3.67366155 | 1.70433879  |
| C | -0.42599753 | -5.06644017 | 1.72081949  |
| C | -4.10660505 | 1.54215420  | 0.58868964  |
| C | -4.79394648 | 1.14174138  | 1.77947017  |
| C | -6.19729869 | 1.01566820  | 1.71419257  |
| C | -6.90441264 | 1.25561499  | 0.52697643  |
| C | -6.20893922 | 1.58849638  | -0.64776245 |
| C | -4.80895165 | 1.72031971  | -0.64750422 |
| C | -4.53269682 | -0.63339758 | 3.58911398  |
| C | -4.08293389 | 0.76328414  | 3.08672245  |
| C | -4.31791306 | 1.82333773  | 4.19687575  |
| C | 1.00392387  | 3.92766536  | -3.12475643 |
| C | 0.55217969  | 3.95929571  | -1.64549256 |
| C | -0.16043955 | 5.30457858  | -1.32785933 |
| C | 1.59144857  | 2.90939294  | 0.49689036  |
| C | 1.70660782  | 3.73706301  | -0.65794467 |
| C | 2.90755440  | 4.45821594  | -0.82502867 |
| C | 3.94335272  | 4.38205590  | 0.11750230  |
| C | 3.78120670  | 3.60286088  | 1.27177847  |
| C | 2.60207531  | 2.85991100  | 1.49667769  |
| C | -4.71452710 | 1.60509357  | -3.21368187 |
| C | -4.04630360 | 2.11116354  | -1.91510172 |
| C | -3.85534948 | 3.65250562  | -1.98131837 |
| C | 3.68762773  | 1.44139849  | 3.34265916  |
| C | 2.40343279  | 2.13688257  | 2.83409420  |
| C | 1.88874010  | 3.13702097  | 3.90823160  |
| H | 2.99614970  | -3.43905091 | -1.34467631 |
| H | 0.64644722  | -4.20984752 | -1.65214992 |
| H | -2.51469249 | 2.90073927  | 2.27175663  |
| H | -0.39454323 | 3.77530713  | 1.66155067  |
| H | 6.53436349  | 0.52753679  | -1.42985426 |
| H | 7.50009921  | -0.38815983 | 0.66677628  |
| H | 6.15829441  | -1.90797941 | 2.09270109  |
| H | 2.97776456  | 0.10651537  | -2.47320402 |
| H | -0.74094190 | -2.14905654 | -3.18107807 |
| H | 5.63193794  | 1.48204132  | -3.16326640 |
| H | 4.33621904  | 2.19899596  | -2.17197948 |
| H | 4.03300009  | 1.77049684  | -3.86500740 |

|   |             |             |             |
|---|-------------|-------------|-------------|
| H | 5.53183073  | -1.07764244 | -3.73153777 |
| H | 4.02627424  | -0.68842030 | -4.59648061 |
| H | 4.04847631  | -1.98907650 | -3.38901201 |
| H | -3.60643990 | -2.06727120 | -4.26625904 |
| H | -2.16778755 | -1.32494535 | -4.99035543 |
| H | -2.74823505 | -0.75532391 | -3.41212153 |
| H | -0.74650683 | -4.61008942 | -3.77707501 |
| H | -1.00750970 | -3.57549500 | -5.20105014 |
| H | -2.37270539 | -4.43049185 | -4.45383352 |
| H | -4.16586715 | -3.66031950 | -2.80781171 |
| H | -5.11872114 | -4.47574888 | -0.66921483 |
| H | -3.74394549 | -4.45554624 | 1.39836525  |
| H | 2.57873097  | -2.83143410 | 1.47668771  |
| H | -0.34142889 | -2.90728249 | 1.63984997  |
| H | 4.69615782  | -2.40478501 | 3.64671721  |
| H | 3.12011272  | -3.19177383 | 3.83810730  |
| H | 3.19273198  | -1.47505659 | 3.40134760  |
| H | 5.25754078  | -4.31592962 | 1.85758250  |
| H | 4.15919205  | -4.57720481 | 0.49497980  |
| H | 3.63893542  | -4.98579633 | 2.14595741  |
| H | -2.32833070 | -2.43883836 | 3.02913377  |
| H | -1.14065116 | -3.45112347 | 3.86483258  |
| H | -2.62499538 | -4.18688863 | 3.23675891  |
| H | -1.16911974 | -5.87150358 | 1.79847540  |
| H | 0.25221253  | -5.14309634 | 2.58119115  |
| H | 0.16035694  | -5.24513364 | 0.80856265  |
| H | -6.74339316 | 0.71302900  | 2.60403384  |
| H | -7.98810166 | 1.16358363  | 0.51190667  |
| H | -6.76055141 | 1.73737352  | -1.57090229 |
| H | -3.00771852 | 0.68688875  | 2.89467549  |
| H | -0.16953195 | 3.14740733  | -1.52688765 |
| H | -5.58149598 | -0.63382789 | 3.91361712  |
| H | -3.91945304 | -0.93675179 | 4.44795890  |
| H | -4.41790316 | -1.38646500 | 2.80155683  |
| H | -3.98093106 | 2.82341090  | 3.89338440  |
| H | -3.77862061 | 1.54445516  | 5.11206676  |
| H | -5.38532394 | 1.90035398  | 4.44335038  |
| H | 1.69596713  | 4.74568351  | -3.36756325 |
| H | 0.12850119  | 4.03371431  | -3.77948318 |
| H | 1.48332397  | 2.97035037  | -3.34874615 |
| H | -0.53688926 | 5.33678949  | -0.29631914 |
| H | -1.01345900 | 5.44917049  | -2.00349469 |
| H | 0.52503337  | 6.15317743  | -1.45658151 |
| H | 3.02637915  | 5.09257135  | -1.69877820 |
| H | 4.86206221  | 4.94358004  | -0.03612121 |
| H | 4.57368903  | 3.57686131  | 2.01364065  |
| H | -3.05057518 | 1.65765039  | -1.84277297 |
| H | 1.64786738  | 1.35783242  | 2.70545960  |
| H | -5.65525900 | 2.13089776  | -3.42971971 |
| H | -4.92577614 | 0.52987327  | -3.16343609 |
| H | -4.04155930 | 1.77747399  | -4.06371330 |
| H | -3.27664934 | 3.92561579  | -2.87426428 |



|    |             |             |             |
|----|-------------|-------------|-------------|
| H  | -3.31766631 | 4.02658802  | -1.10185119 |
| H  | -4.82583143 | 4.16592121  | -2.03236860 |
| H  | 4.10439497  | 0.77151191  | 2.58314309  |
| H  | 3.45477453  | 0.84477476  | 4.23391060  |
| H  | 4.46240702  | 2.16614726  | 3.62792520  |
| H  | 0.93827199  | 3.60111070  | 3.61544030  |
| H  | 2.61671464  | 3.94301551  | 4.07365207  |
| H  | 1.72911898  | 2.61741124  | 4.86227714  |
| O  | -1.14114745 | 0.11495554  | -1.60006589 |
| O  | -1.02770158 | -0.41771917 | 1.40724323  |
| O  | 1.28191576  | -0.68700607 | 1.68222571  |
| O  | 0.17366917  | -0.09082043 | -2.37809164 |
| O  | 1.10862878  | 0.99564801  | -1.84374606 |
| Zr | 0.40344923  | -0.17536138 | -0.16074367 |
| O  | 0.00501497  | -0.62794935 | 2.49001154  |

### 3. NCCN Triplet Ground States

#### 3.1 Structures with zero oxygen atoms

##### Bare complex

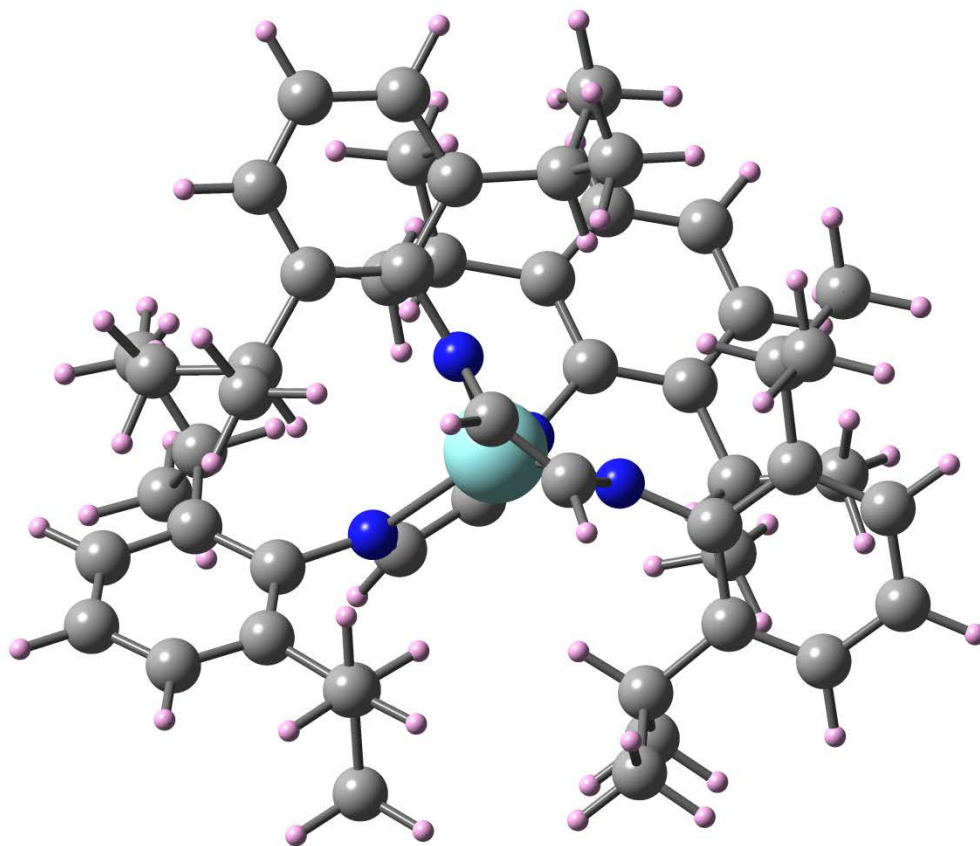

Fig. S25: NCCN Bare Complex

| SCF          | E <sub>ZP</sub> | H            | G            |
|--------------|-----------------|--------------|--------------|
| -2290.229159 | -2289.096443    | -2289.033099 | -2289.195301 |

|    |             |             |             |
|----|-------------|-------------|-------------|
| Zr | -0.01113913 | -0.26297665 | 0.11883555  |
| N  | -1.71511356 | -1.42133557 | -1.04163466 |
| N  | 0.45643862  | -0.06104666 | -2.08651191 |
| N  | -0.52829488 | 1.05149645  | 1.66079716  |
| N  | 1.71113040  | -0.70775533 | 1.26084187  |
| C  | -1.34772097 | -1.62299857 | -2.33361134 |
| C  | -0.24527878 | -0.92220104 | -2.87461060 |
| C  | -0.07258006 | 0.18313145  | 2.69629964  |
| C  | 1.00623682  | -0.66244497 | 2.49806602  |
| C  | -3.03778771 | -1.86891811 | -0.65037268 |
| C  | -4.19216277 | -1.30611199 | -1.28715657 |
| C  | -5.46775176 | -1.74106019 | -0.87004741 |

|   |             |             |             |
|---|-------------|-------------|-------------|
| C | -5.62472605 | -2.69168431 | 0.14773522  |
| C | -4.48786188 | -3.23758144 | 0.76038954  |
| C | -3.18861599 | -2.84959950 | 0.37420537  |
| C | -4.60436651 | -0.85917351 | -3.75957909 |
| C | -4.12341150 | -0.25739795 | -2.41029610 |
| C | -4.93183919 | 1.02444248  | -2.08301020 |
| C | 1.30470764  | 0.91600938  | -2.75280115 |
| C | 2.68790654  | 0.65531847  | -2.96487497 |
| C | 3.46697980  | 1.64933108  | -3.59451816 |
| C | 2.90034243  | 2.86178547  | -4.01567982 |
| C | 1.53023900  | 3.09403546  | -3.82309666 |
| C | 0.70883410  | 2.13474996  | -3.19550903 |
| C | -1.89108699 | -5.01601815 | 0.43611981  |
| C | -1.98977307 | -3.57046141 | 0.99493432  |
| C | -2.02544371 | -3.57835592 | 2.54302599  |
| C | -1.24991822 | 2.25565283  | 2.00164713  |
| C | -0.57532710 | 3.51221464  | 1.92734676  |
| C | -1.30117232 | 4.69188925  | 2.19483026  |
| C | -2.65563123 | 4.64734253  | 2.55661352  |
| C | -3.29705713 | 3.40643699  | 2.67784269  |
| C | -2.61846686 | 2.19814085  | 2.40936847  |
| C | 1.35460809  | 4.72198197  | 0.70781273  |
| C | 0.93429581  | 3.59948368  | 1.68612252  |
| C | 1.65606475  | 3.78533558  | 3.05070256  |
| C | 3.03205469  | -1.29158695 | 1.26877288  |
| C | 3.23136378  | -2.66061204 | 0.91506125  |
| C | 4.54466130  | -3.17895127 | 0.90279764  |
| C | 5.64511462  | -2.38599322 | 1.25627236  |
| C | 5.43705731  | -1.05378969 | 1.64234382  |
| C | 4.14581828  | -0.48707299 | 1.65757734  |
| C | -4.76999436 | 0.85420512  | 1.98888044  |
| C | -3.35924407 | 0.87343883  | 2.62623644  |
| C | -3.47601325 | 0.55188255  | 4.14353578  |
| C | 3.22717958  | -1.67887731 | -3.79160238 |
| C | 3.31589296  | -0.69123958 | -2.59362652 |
| C | 4.78369755  | -0.58210200 | -2.11986543 |
| C | 2.16018738  | -4.24750593 | -0.79353917 |
| C | 2.07147384  | -3.61633636 | 0.61943486  |
| C | 1.98544592  | -4.72312143 | 1.70472926  |
| C | 4.33290320  | 1.08285584  | 3.63696394  |
| C | 3.97758892  | 0.95948072  | 2.13045112  |
| C | 4.81605755  | 1.95381205  | 1.28667169  |
| C | -1.49962580 | 2.14110062  | -4.43816911 |
| C | -0.79866160 | 2.39315728  | -3.07410995 |
| C | -1.14445496 | 3.80793214  | -2.55088637 |
| H | -1.93220309 | -2.27724583 | -2.97900127 |
| H | -0.02276027 | -1.00840418 | -3.93690885 |
| H | -0.63371733 | 0.11333449  | 3.62531643  |
| H | 1.25425368  | -1.39370365 | 3.26745733  |
| H | -6.35123106 | -1.32317157 | -1.34652281 |
| H | -6.61891839 | -3.00890725 | 0.45293317  |
| H | -4.60984696 | -3.99000573 | 1.53553022  |

|   |             |             |             |
|---|-------------|-------------|-------------|
| H | -3.08330206 | 0.05292167  | -2.54242764 |
| H | -4.02954084 | -1.75362487 | -4.03150247 |
| H | -4.49692540 | -0.12379216 | -4.56824142 |
| H | -5.66171485 | -1.15023754 | -3.70695720 |
| H | -5.99677692 | 0.80992558  | -1.92857877 |
| H | -4.85462079 | 1.73837387  | -2.91438396 |
| H | -4.55171249 | 1.51566306  | -1.18030661 |
| H | 4.52612125  | 1.47240566  | -3.75748475 |
| H | 3.51949745  | 3.61520556  | -4.49707910 |
| H | 1.09474042  | 4.02960055  | -4.16454184 |
| H | -1.08120348 | -3.03635691 | 0.69224657  |
| H | -2.78555244 | -5.59820787 | 0.69431861  |
| H | -1.01830517 | -5.53404661 | 0.85417927  |
| H | -1.79857187 | -5.01238671 | -0.65760069 |
| H | -2.08521498 | -2.55792799 | 2.94108234  |
| H | -1.11471086 | -4.04612304 | 2.93938941  |
| H | -2.88282665 | -4.14507449 | 2.92880855  |
| H | -0.79745033 | 5.65333512  | 2.13239039  |
| H | -3.19996429 | 5.56712146  | 2.75861325  |
| H | -4.33986848 | 3.37469891  | 2.98381072  |
| H | 1.26057849  | 2.64457287  | 1.26150504  |
| H | 1.14104031  | 5.72082665  | 1.11130123  |
| H | 0.84312283  | 4.62946509  | -0.25687084 |
| H | 2.43537341  | 4.66766354  | 0.52076014  |
| H | 2.74318450  | 3.84045278  | 2.90811973  |
| H | 1.44016658  | 2.95102794  | 3.72913809  |
| H | 1.32914515  | 4.71380092  | 3.53831181  |
| H | 4.70375247  | -4.22037951 | 0.63085161  |
| H | 6.64903244  | -2.80414550 | 1.24507501  |
| H | 6.28891801  | -0.44530093 | 1.93747860  |
| H | -2.77669236 | 0.07277031  | 2.15570267  |
| H | -5.45422710 | 1.54455471  | 2.49969894  |
| H | -5.20074657 | -0.15270622 | 2.05560045  |
| H | -4.73411738 | 1.13471306  | 0.93140603  |
| H | -2.49713447 | 0.53950573  | 4.63831561  |
| H | -3.94995657 | -0.42783815 | 4.29369972  |
| H | -4.09046688 | 1.30775839  | 4.65088507  |
| H | 2.73436938  | -1.11773029 | -1.76697565 |
| H | 2.18916905  | -1.86028070 | -4.09455039 |
| H | 3.67833335  | -2.64430030 | -3.52606940 |
| H | 3.76730838  | -1.27841742 | -4.66011957 |
| H | 5.46027269  | -0.33070214 | -2.94782401 |
| H | 5.11140920  | -1.54160513 | -1.70321016 |
| H | 4.89942102  | 0.17499148  | -1.33717964 |
| H | 1.13921020  | -3.04118781 | 0.66730677  |
| H | 2.17473418  | -3.47728512 | -1.57364036 |
| H | 1.29650368  | -4.90141621 | -0.97541632 |
| H | 3.06791843  | -4.85506712 | -0.90502823 |
| H | 2.89254025  | -5.34133190 | 1.71397091  |
| H | 1.13078602  | -5.38530330 | 1.51394499  |
| H | 1.86922726  | -4.28838953 | 2.70572943  |
| H | 2.92550541  | 1.23018681  | 2.01162677  |

|   |             |            |             |
|---|-------------|------------|-------------|
| H | 3.70697741  | 0.41628177 | 4.24366591  |
| H | 4.17528308  | 2.11099480 | 3.98741749  |
| H | 5.38312388  | 0.81946544 | 3.82088699  |
| H | 5.89070546  | 1.73741419 | 1.35185453  |
| H | 4.66280413  | 2.98066904 | 1.64522005  |
| H | 4.52642250  | 1.91891481 | 0.22903364  |
| H | -1.20863698 | 1.67602622 | -2.35283560 |
| H | -1.12714660 | 2.83825213 | -5.20068243 |
| H | -2.58457191 | 2.28687247 | -4.34540288 |
| H | -1.31910188 | 1.12147075 | -4.80046338 |
| H | -0.67884656 | 3.99641102 | -1.57787499 |
| H | -2.23113903 | 3.90685713 | -2.42721186 |
| H | -0.81921511 | 4.59394321 | -3.24453148 |

### 3.2 Structures with one oxygen atom

#### Oxo Complex

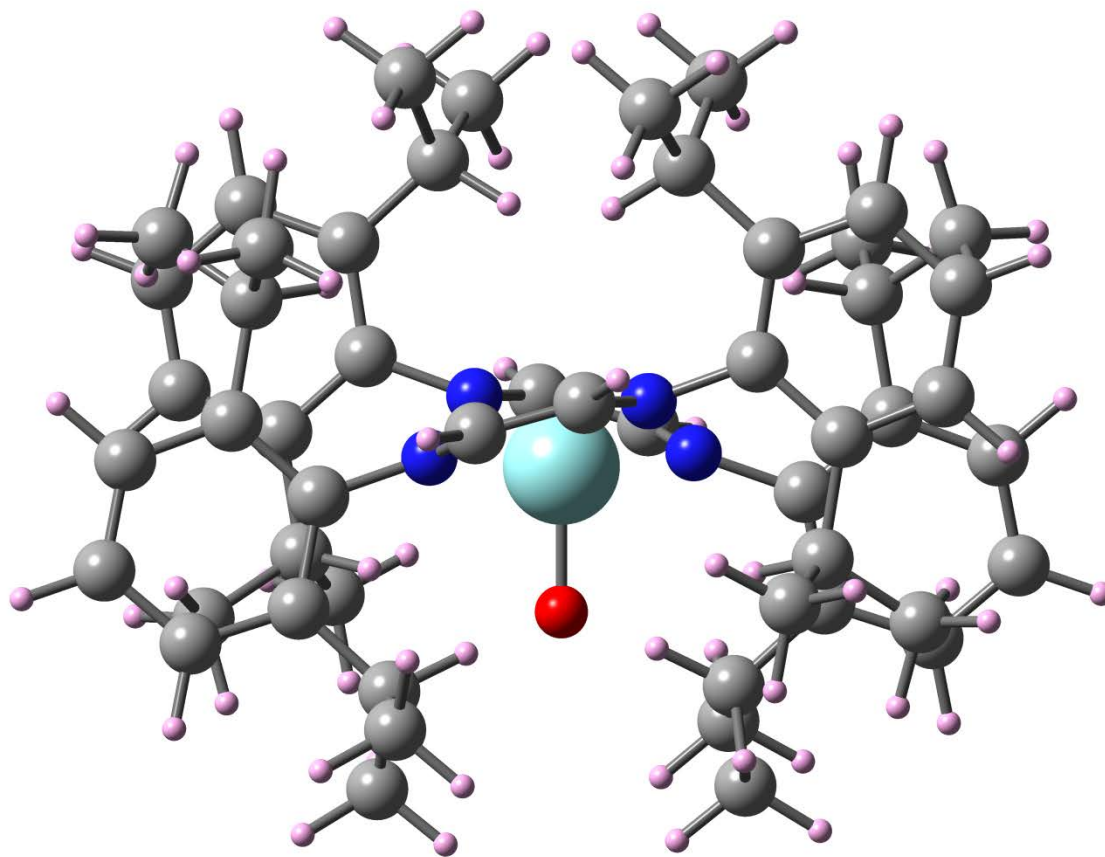

Fig. S26: NCCN Oxo Complex

| SCF          | E <sub>ZP</sub> | H            | G            |
|--------------|-----------------|--------------|--------------|
| -2365.536429 | -2364.399072    | -2364.333753 | -2364.500378 |

|   |             |             |             |
|---|-------------|-------------|-------------|
| O | -0.00136808 | -2.23437050 | -0.03359683 |
| N | -1.07934441 | 0.43860784  | -1.84128857 |
| N | 1.63753911  | -0.26692107 | -1.69298835 |
| N | 1.07940790  | 0.37589277  | 1.85584098  |
| N | -1.63706059 | -0.32270330 | 1.68786923  |
| C | -0.27900949 | 0.45785572  | -2.94820624 |
| C | 1.07199633  | 0.07836718  | -2.87710391 |
| C | 0.28193500  | 0.35494609  | 2.96481288  |
| C | -1.06935173 | -0.02120278 | 2.88282942  |
| C | -2.42709647 | 0.93213429  | -2.09055076 |
| C | -3.47332564 | 0.00183491  | -2.35173446 |
| C | -4.73351458 | 0.50913662  | -2.73319571 |
| C | -4.95354513 | 1.88929046  | -2.86747913 |
| C | -3.91583368 | 2.79170158  | -2.59269228 |

|   |             |             |             |
|---|-------------|-------------|-------------|
| C | -2.64168315 | 2.33668163  | -2.19353993 |
| C | -4.43523578 | -2.31625789 | -1.78520990 |
| C | -3.22684703 | -1.51094421 | -2.31749417 |
| C | -2.82372786 | -2.02638225 | -3.72773337 |
| C | 2.27953668  | -4.38773024 | -1.31676121 |
| C | 2.13469099  | -3.15273298 | -2.23979441 |
| C | 2.06772139  | -3.58500824 | -3.73031789 |
| C | 3.01437877  | -0.74749356 | -1.78956956 |
| C | 3.25836805  | -2.13068419 | -2.03268840 |
| C | 4.59758707  | -2.56009482 | -2.16165940 |
| C | 5.66601373  | -1.65856608 | -2.07097535 |
| C | 5.40743492  | -0.29505276 | -1.86354810 |
| C | 4.08916657  | 0.18885745  | -1.72881097 |
| C | -1.93936472 | 4.38255776  | -0.82604163 |
| C | -1.53151524 | 3.35908109  | -1.91701541 |
| C | -1.10588340 | 4.09728610  | -3.21452076 |
| C | 4.94315649  | 2.42899695  | -0.79612089 |
| C | 3.84557326  | 1.69814195  | -1.60487337 |
| C | 3.72619830  | 2.35910139  | -3.00819333 |
| C | 2.42570069  | 0.86653070  | 2.11819601  |
| C | 2.63425646  | 2.26811919  | 2.26400336  |
| C | 3.90714324  | 2.71655889  | 2.67446815  |
| C | 4.94928838  | 1.81076044  | 2.91977031  |
| C | 4.73500110  | 0.43433525  | 2.74369802  |
| C | 3.47642310  | -0.06668816 | 2.34888750  |
| C | 1.91947477  | 4.34548894  | 0.95357187  |
| C | 1.51925300  | 3.29325994  | 2.01985876  |
| C | 1.09676997  | 3.99524666  | 3.33821271  |
| C | -2.28397438 | -4.43120901 | 1.19324072  |
| C | -2.13444523 | -3.22239552 | 2.14959591  |
| C | -2.06176210 | -3.69563762 | 3.62724326  |
| C | -3.01391232 | -0.80565654 | 1.76900728  |
| C | -3.25840343 | -2.19479687 | 1.97424478  |
| C | -4.59782828 | -2.62697512 | 2.09135171  |
| C | -5.66574184 | -1.72272971 | 2.02462578  |
| C | -5.40661919 | -0.35433625 | 1.85246599  |
| C | -4.08818924 | 0.13232709  | 1.73075437  |
| C | 4.44877501  | -2.36306208 | 1.71447815  |
| C | 3.23622367  | -1.57876257 | 2.26799588  |
| C | 2.83232694  | -2.13852443 | 3.66100188  |
| C | -4.94749449 | 2.39695348  | 0.86490080  |
| C | -3.84217293 | 1.64372882  | 1.64165319  |
| C | -3.70334756 | 2.27027162  | 3.05889389  |
| H | -5.54545213 | -0.18176754 | -2.94091277 |
| H | -5.92799325 | 2.25722750  | -3.18003915 |
| H | -4.09619464 | 3.85979239  | -2.69010105 |
| H | -2.37993951 | -1.70828210 | -1.64893603 |
| H | 1.18186955  | -2.69064733 | -1.97713546 |
| H | -5.28262073 | -2.29008968 | -2.48378634 |
| H | -4.77574404 | -1.94055954 | -0.81463886 |
| H | -4.15016569 | -3.36871823 | -1.65924842 |
| H | -3.62962458 | -1.84431701 | -4.45190495 |

|   |             |             |             |
|---|-------------|-------------|-------------|
| H | -2.62997179 | -3.10663547 | -3.69478676 |
| H | -1.91704329 | -1.53123010 | -4.09428885 |
| H | 3.20413228  | -4.94830118 | -1.51287908 |
| H | 1.43298620  | -5.06864630 | -1.47379851 |
| H | 2.26687969  | -4.08356982 | -0.26458310 |
| H | 1.91619844  | -2.72119172 | -4.39139711 |
| H | 1.23335435  | -4.28244645 | -3.88496593 |
| H | 2.99232882  | -4.08832090 | -4.04465583 |
| H | 4.79990604  | -3.61233629 | -2.34494699 |
| H | 6.69005791  | -2.01042185 | -2.17291010 |
| H | 6.23913285  | 0.40102653  | -1.81134061 |
| H | -0.65387042 | 2.81807283  | -1.54496144 |
| H | 2.88901897  | 1.84078532  | -1.08537003 |
| H | -2.80028832 | 4.98708351  | -1.13983328 |
| H | -1.10711543 | 5.07000072  | -0.62250141 |
| H | -2.20557178 | 3.88030769  | 0.11192222  |
| H | -1.94343005 | 4.66801953  | -3.63697756 |
| H | -0.76190166 | 3.39174151  | -3.98068966 |
| H | -0.28852552 | 4.80068173  | -3.00617682 |
| H | 5.12861955  | 1.94201160  | 0.16511424  |
| H | 4.63577130  | 3.46391630  | -0.59900051 |
| H | 5.88949994  | 2.47327408  | -1.35182953 |
| H | 4.64664664  | 2.19932528  | -3.58571325 |
| H | 3.57283566  | 3.44245765  | -2.90690876 |
| H | 2.88941979  | 1.95187102  | -3.58509928 |
| H | 4.08287295  | 3.78201597  | 2.80399903  |
| H | 5.92275524  | 2.17322973  | 3.24163790  |
| H | 5.55034913  | -0.25894436 | 2.92885046  |
| H | 0.64165716  | 2.75934061  | 1.63759185  |
| H | -1.18284750 | -2.75311833 | 1.89523717  |
| H | 2.77933828  | 4.94502877  | 1.27959478  |
| H | 1.08407567  | 5.03451165  | 0.76929266  |
| H | 2.18479990  | 3.86685149  | 0.00303921  |
| H | 0.76217359  | 3.26776591  | 4.08792136  |
| H | 0.27339624  | 4.69811789  | 3.15317016  |
| H | 1.93287335  | 4.56069767  | 3.77053362  |
| H | -3.20794328 | -4.99654755 | 1.37813032  |
| H | -1.43704903 | -5.11670012 | 1.32689784  |
| H | -2.27634626 | -4.09773255 | 0.14988524  |
| H | -1.90837570 | -2.85029299 | 4.31135257  |
| H | -1.22650020 | -4.39651920 | 3.75965209  |
| H | -2.98504633 | -4.20796392 | 3.93079005  |
| H | -4.80070878 | -3.68370913 | 2.24576827  |
| H | -6.68998838 | -2.07661382 | 2.11711750  |
| H | -6.23810800 | 0.34296057  | 1.81737949  |
| H | 2.39166748  | -1.75874459 | 1.59156172  |
| H | -2.89131235 | 1.79528393  | 1.11384949  |
| H | 5.29482288  | -2.35401850 | 2.41508194  |
| H | 4.78912479  | -1.95788327 | 0.75580912  |
| H | 4.16821610  | -3.41251693 | 1.55718079  |
| H | 2.64358762  | -3.21817060 | 3.59494659  |
| H | 1.92255995  | -1.65906461 | 4.04050894  |



|    |             |             |             |
|----|-------------|-------------|-------------|
| H  | 3.63597770  | -1.97490850 | 4.39207746  |
| H  | -5.14551994 | 1.93454138  | -0.10597101 |
| H  | -4.64023865 | 3.43584337  | 0.69022180  |
| H  | -5.88696386 | 2.42913708  | 1.43302758  |
| H  | -2.85978785 | 1.84827749  | 3.61478676  |
| H  | -4.61662315 | 2.09827259  | 3.64425529  |
| H  | -3.54927319 | 3.35554006  | 2.98171490  |
| H  | -0.69468454 | 0.77233245  | -3.90361986 |
| H  | 1.65721764  | 0.03316483  | -3.79366767 |
| H  | 0.69954482  | 0.63554413  | 3.92987564  |
| H  | -1.65332526 | -0.09844308 | 3.79807746  |
| Zr | -0.00149591 | -0.43114047 | -0.00582820 |

### 3.3 Structures with two oxygen atoms

#### Dioxo Complex

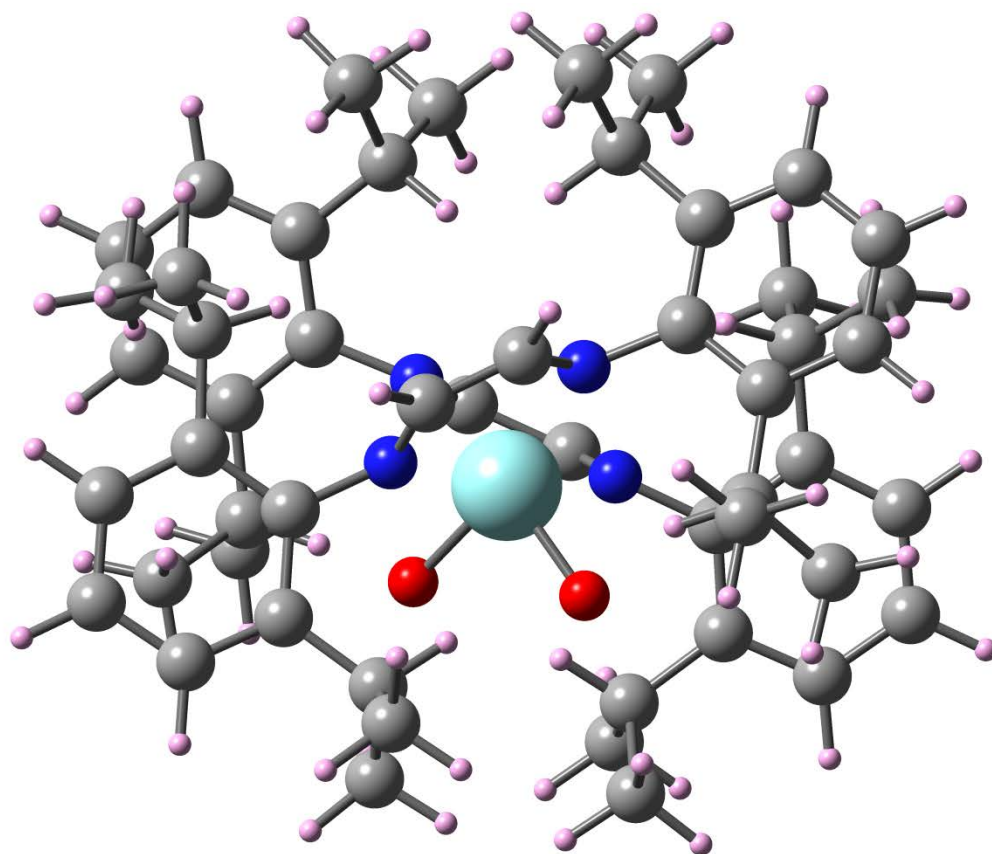

Fig. S27: NCCN Dioxo Complex

| SCF          | $E_{ZP}$     | H            | G            |
|--------------|--------------|--------------|--------------|
| -2440.697568 | -2439.559690 | -2439.491870 | -2439.664886 |

|    |             |             |             |
|----|-------------|-------------|-------------|
| Zr | 0.06761693  | -0.67608137 | 0.20113344  |
| N  | 1.48423033  | -0.56264104 | -1.85190438 |
| N  | -1.10451560 | 0.69033303  | -1.96954563 |
| N  | -1.44542228 | -0.37867515 | 1.92481189  |
| N  | 1.07311158  | 0.86976669  | 1.77298505  |
| C  | 0.90829005  | -0.23408806 | -2.96902810 |
| C  | -0.42891174 | 0.37496588  | -3.03275259 |
| C  | -0.98747230 | 0.39761134  | 2.93939741  |
| C  | 0.27646652  | 1.01618580  | 2.86546593  |
| C  | 2.81018174  | -1.18901357 | -1.96171263 |
| C  | 3.95809790  | -0.35140727 | -1.95119061 |
| C  | 5.21936258  | -0.97044939 | -2.07038173 |
| C  | 5.33465622  | -2.36272513 | -2.20295649 |
| C  | 4.18293740  | -3.16076290 | -2.22583450 |
| C  | 2.89354727  | -2.59864809 | -2.10668594 |

|   |             |             |             |
|---|-------------|-------------|-------------|
| C | 5.02672616  | 1.83459304  | -1.12247163 |
| C | 3.84757773  | 1.17704581  | -1.87525177 |
| C | 3.73537501  | 1.79841922  | -3.29661319 |
| C | -1.93384207 | 4.56071660  | -0.46128655 |
| C | -1.48248244 | 3.53502809  | -1.52863486 |
| C | -0.83534875 | 4.25377472  | -2.74519723 |
| C | -2.43878644 | 1.23867366  | -2.19852775 |
| C | -2.62684841 | 2.63285086  | -1.99630434 |
| C | -3.87680032 | 3.18959412  | -2.32971034 |
| C | -4.91701687 | 2.38863926  | -2.82489600 |
| C | -4.72157017 | 1.00915934  | -2.97756474 |
| C | -3.48567183 | 0.39687329  | -2.67353799 |
| C | 1.74969128  | -4.69489519 | -1.19863795 |
| C | 1.66533634  | -3.51184281 | -2.19441629 |
| C | 1.47200269  | -4.01985119 | -3.64997479 |
| C | -4.42064055 | -1.88737644 | -2.03751861 |
| C | -3.34593482 | -1.12056448 | -2.85144240 |
| C | -3.40981868 | -1.51857651 | -4.35038540 |
| C | -2.75283834 | -0.99267995 | 2.10858983  |
| C | -2.84185911 | -2.40147781 | 2.31175270  |
| C | -4.11799549 | -2.97919303 | 2.47742251  |
| C | -5.28261281 | -2.19927923 | 2.46721578  |
| C | -5.18008345 | -0.81153778 | 2.29924672  |
| C | -3.92947754 | -0.18228007 | 2.11842105  |
| C | -1.65456532 | -4.50414528 | 1.46883841  |
| C | -1.60953108 | -3.30057185 | 2.44270711  |
| C | -1.44226120 | -3.77753438 | 3.91125870  |
| C | 2.03431077  | 4.56033627  | -0.03888599 |
| C | 1.56053898  | 3.74174622  | 1.18884905  |
| C | 1.06823750  | 4.69172545  | 2.31484706  |
| C | 2.41418713  | 1.41838482  | 1.95126554  |
| C | 2.65375402  | 2.80201022  | 1.70823997  |
| C | 3.92498866  | 3.33579312  | 2.00888028  |
| C | 4.94686325  | 2.52978441  | 2.52967081  |
| C | 4.70505148  | 1.16611291  | 2.74940430  |
| C | 3.44743448  | 0.58502656  | 2.47620866  |
| C | -4.91784402 | 1.85259430  | 0.91880771  |
| C | -3.90080927 | 1.34549723  | 1.97065116  |
| C | -4.17093593 | 2.04417097  | 3.33257571  |
| C | 4.29518550  | -1.81316290 | 2.19339084  |
| C | 3.22238992  | -0.89021176 | 2.82323826  |
| C | 3.16522297  | -1.08593737 | 4.36288428  |
| H | 1.39550276  | -0.42866586 | -3.92739015 |
| H | -0.83355627 | 0.53893731  | -4.03566485 |
| H | -1.58047320 | 0.51805650  | 3.84401249  |
| H | 0.63391888  | 1.57953277  | 3.72730954  |
| H | 6.11710342  | -0.36051414 | -2.05630956 |
| H | 6.31690677  | -2.82081802 | -2.29030300 |
| H | 4.28029014  | -4.23738382 | -2.33435320 |
| H | 2.92978848  | 1.42431189  | -1.32304335 |
| H | -0.71330276 | 2.89913482  | -1.07086455 |
| H | 5.96243316  | 1.75539672  | -1.69159372 |

|   |             |             |             |
|---|-------------|-------------|-------------|
| H | 5.17682583  | 1.38216375  | -0.13779636 |
| H | 4.82481524  | 2.90161418  | -0.97186266 |
| H | 4.62599436  | 1.55593771  | -3.89116464 |
| H | 3.65844412  | 2.89205858  | -3.23019716 |
| H | 2.86021007  | 1.43090944  | -3.84654493 |
| H | -2.64887381 | 5.28683490  | -0.86855456 |
| H | -1.07057229 | 5.12637648  | -0.09143919 |
| H | -2.40641812 | 4.06152274  | 0.39342310  |
| H | -0.46449054 | 3.53304059  | -3.48605899 |
| H | 0.00827306  | 4.87777055  | -2.42511670 |
| H | -1.56754205 | 4.89966234  | -3.24725131 |
| H | -4.03732579 | 4.25669678  | -2.20452553 |
| H | -5.87503710 | 2.83494747  | -3.07958948 |
| H | -5.53867035 | 0.39111081  | -3.33950334 |
| H | 0.77293693  | -2.94536666 | -1.91593197 |
| H | -2.38324827 | -1.45057712 | -2.44807556 |
| H | 2.60080989  | -5.35568980 | -1.41274165 |
| H | 0.83397070  | -5.29744993 | -1.26207370 |
| H | 1.83547755  | -4.30989784 | -0.17787111 |
| H | 2.32789985  | -4.62490575 | -3.97824138 |
| H | 1.36179336  | -3.18879163 | -4.36152145 |
| H | 0.57098220  | -4.64367245 | -3.71429400 |
| H | -4.36448616 | -1.63176287 | -0.97384168 |
| H | -4.24877212 | -2.96719276 | -2.12844975 |
| H | -5.43775799 | -1.67534389 | -2.39455256 |
| H | -4.37385819 | -1.24041869 | -4.79716823 |
| H | -3.29013522 | -2.60452315 | -4.45647504 |
| H | -2.62030174 | -1.03051822 | -4.93900429 |
| H | -4.19513737 | -4.05272560 | 2.63098385  |
| H | -6.25668042 | -2.66455287 | 2.60044978  |
| H | -6.08369974 | -0.20710034 | 2.30703258  |
| H | -0.71913978 | -2.72442063 | 2.18765413  |
| H | 0.70682332  | 3.12803481  | 0.87812728  |
| H | -2.49282748 | -5.17990651 | 1.68940219  |
| H | -0.72478524 | -5.08241922 | 1.54991171  |
| H | -1.74770001 | -4.14925050 | 0.43664304  |
| H | -1.36161441 | -2.92564005 | 4.59995671  |
| H | -0.53100449 | -4.38289581 | 4.00944285  |
| H | -2.29467101 | -4.39111350 | 4.23401289  |
| H | 2.87710187  | 5.21585446  | 0.21420659  |
| H | 1.22423509  | 5.20122887  | -0.40976477 |
| H | 2.35451046  | 3.90265449  | -0.85736411 |
| H | 0.68003508  | 4.12439912  | 3.16943525  |
| H | 0.26658910  | 5.34833439  | 1.95038926  |
| H | 1.88747123  | 5.32617732  | 2.67808063  |
| H | 4.11297545  | 4.39428703  | 1.84410077  |
| H | 5.91812801  | 2.95941585  | 2.76396886  |
| H | 5.49583996  | 0.54236130  | 3.15855667  |
| H | -2.90116094 | 1.64271181  | 1.63253950  |
| H | 2.26288763  | -1.20912142 | 2.41142387  |
| H | -5.95258401 | 1.68208942  | 1.24331384  |
| H | -4.77907251 | 1.35314903  | -0.04497153 |

|   |             |             |             |
|---|-------------|-------------|-------------|
| H | -4.79726999 | 2.93293639  | 0.76375021  |
| H | -4.13062051 | 3.13667039  | 3.22084668  |
| H | -3.43932776 | 1.75232976  | 4.09546527  |
| H | -5.16711516 | 1.77899300  | 3.71074130  |
| H | 4.32046742  | -1.69824470 | 1.10355942  |
| H | 4.05300819  | -2.86119435 | 2.41088329  |
| H | 5.30082073  | -1.61068901 | 2.58801393  |
| H | 2.36665726  | -0.48157835 | 4.81284673  |
| H | 4.11360399  | -0.80032566 | 4.83917439  |
| H | 2.96851360  | -2.13966819 | 4.60154838  |
| O | -1.15287758 | -1.93491896 | -0.75353710 |
| O | 1.08162191  | -2.11459865 | 0.74552719  |

## Peroxo Complex

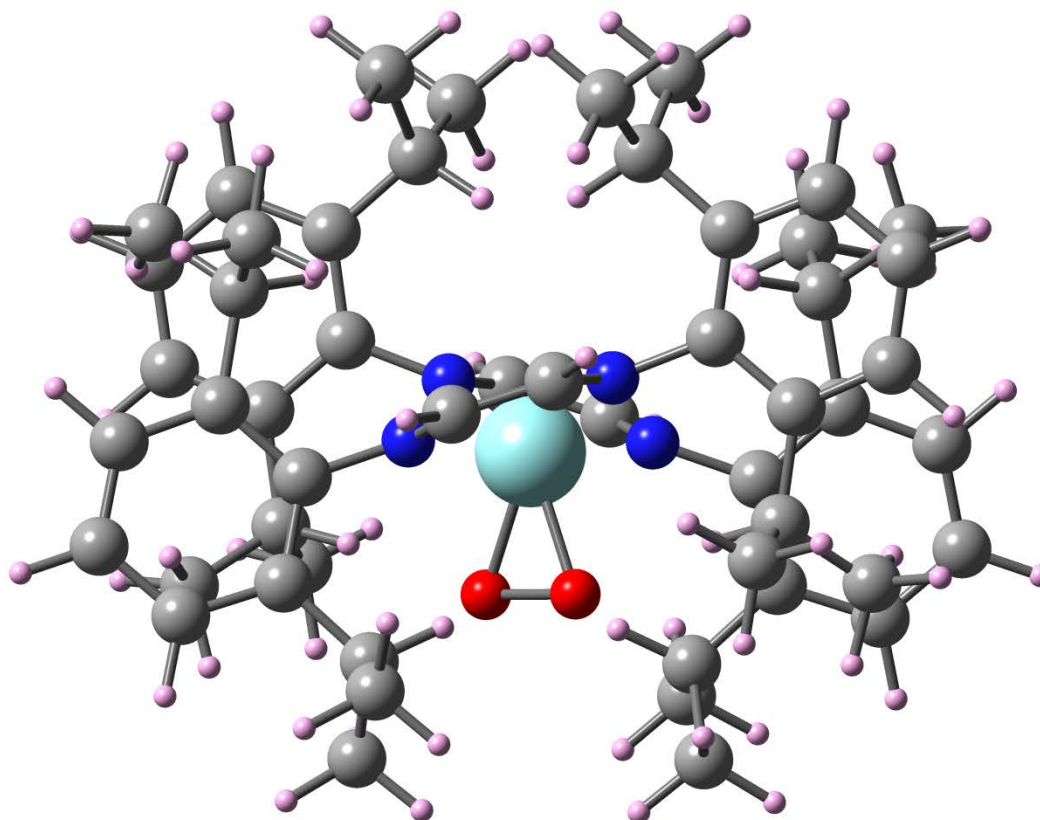

Fig. S28: NCCN Peroxo Complex

| SCF          | E <sub>ZP</sub> | H            | G            |
|--------------|-----------------|--------------|--------------|
| -2440.687177 | -2439.546756    | -2439.480415 | -2439.648548 |

|    |             |             |             |
|----|-------------|-------------|-------------|
| Zr | 0.00013805  | -0.45950495 | 0.00345695  |
| N  | -1.59456007 | -0.31456293 | 1.68943008  |
| N  | 1.06972114  | 0.50341211  | 1.80616309  |
| N  | 1.59437917  | -0.34107496 | -1.68504718 |
| N  | -1.06914603 | 0.47402413  | -1.81451718 |
| C  | -1.03326403 | 0.02919009  | 2.87528518  |
| C  | 0.30408208  | 0.45939712  | 2.93241818  |
| C  | 1.03211113  | -0.02084793 | -2.87694027 |
| C  | -0.30544197 | 0.40788212  | -2.94096327 |
| C  | -2.97607618 | -0.79143095 | 1.78745009  |
| C  | -4.04641226 | 0.14988513  | 1.73041909  |
| C  | -5.36606638 | -0.33041590 | 1.86593009  |
| C  | -5.62857037 | -1.69308300 | 2.07220911  |
| C  | -4.56307732 | -2.59744408 | 2.16504812  |
| C  | -3.22231621 | -2.17278206 | 2.03594611  |
| C  | -4.91947430 | 2.40110531  | 0.84152902  |

|   |             |             |             |
|---|-------------|-------------|-------------|
| C | -3.80050522 | 1.65971624  | 1.61027208  |
| C | -3.64046421 | 2.31167829  | 3.01411618  |
| C | 1.89096923  | 4.46821741  | 0.72368601  |
| C | 1.47256319  | 3.43029333  | 1.79617609  |
| C | 0.98063716  | 4.15042339  | 3.08059519  |
| C | 2.41163125  | 1.02772214  | 2.05190411  |
| C | 2.59876727  | 2.43803225  | 2.11239012  |
| C | 3.85633437  | 2.92935127  | 2.52105415  |
| C | 4.90358744  | 2.05612120  | 2.84863617  |
| C | 4.70928142  | 0.66911509  | 2.75938617  |
| C | 3.46657932  | 0.12538106  | 2.36940313  |
| C | -2.26607216 | -4.46082324 | 1.38091306  |
| C | -2.10336914 | -3.19624614 | 2.25972313  |
| C | -2.02673613 | -3.58184917 | 3.76358124  |
| C | 4.45561338  | -2.17713112 | 1.79910709  |
| C | 3.25786829  | -1.39335005 | 2.38671914  |
| C | 2.95585026  | -1.88326808 | 3.83079624  |
| C | 2.97572827  | -0.81983400 | -1.77405718 |
| C | 3.22204928  | -2.20427511 | -2.00423420 |
| C | 4.56308538  | -2.63101216 | -2.12401521 |
| C | 5.62859746  | -1.72588510 | -2.04001621 |
| C | 5.36601844  | -0.36048699 | -1.85204719 |
| C | 4.04624536  | 0.12183806  | -1.72625818 |
| C | 2.26030619  | -4.47918828 | -1.31431315 |
| C | 2.10367719  | -3.23078618 | -2.21702822 |
| C | 2.03657218  | -3.64364721 | -3.71412933 |
| C | -1.89657705 | 4.46534244  | -0.80151711 |
| C | -1.47273103 | 3.39991736  | -1.84451019 |
| C | -0.96782599 | 4.08641140  | -3.14236729 |
| C | -2.41124713 | 0.99416718  | -2.06774620 |
| C | -2.59914213 | 2.40353629  | -2.14693221 |
| C | -3.85643822 | 2.88858034  | -2.56364424 |
| C | -4.90313830 | 2.01049228  | -2.88010527 |
| C | -4.70829631 | 0.62498317  | -2.77196826 |
| C | -3.46544021 | 0.08721812  | -2.37407523 |
| C | 4.92207945  | 2.38717822  | -0.87564011 |
| C | 3.79932335  | 1.63294018  | -1.62602617 |
| C | 3.62900135  | 2.26511823  | -3.03773028 |
| C | -4.44977631 | -2.20631305 | -1.76247818 |
| C | -3.25665921 | -1.43162000 | -2.37125923 |
| C | -2.96678919 | -1.94217504 | -3.81067134 |
| H | -1.61035707 | -0.04562291 | 3.79438224  |
| H | 0.72857211  | 0.76539714  | 3.88644025  |
| H | 1.60858317  | -0.11321094 | -3.79485434 |
| H | -0.73151900 | 0.69452414  | -3.90025035 |
| H | -6.19591040 | 0.36747616  | 1.81432309  |
| H | -6.65376746 | -2.04196802 | 2.17250212  |
| H | -4.76854334 | -3.64848116 | 2.35011213  |
| H | -2.85953715 | 1.80403025  | 1.06303103  |
| H | 0.62356212  | 2.86579130  | 1.39280406  |
| H | -5.84785036 | 2.44358732  | 1.42685206  |
| H | -5.13648533 | 1.92395527  | -0.11794006 |

|   |             |             |             |
|---|-------------|-------------|-------------|
| H | -4.61501827 | 3.43670138  | 0.64466200  |
| H | -4.54288128 | 2.14492129  | 3.61738323  |
| H | -3.49422819 | 3.39628237  | 2.91533218  |
| H | -2.78558514 | 1.90518625  | 3.56403723  |
| H | 2.72482530  | 5.09363545  | 1.06764804  |
| H | 1.04954317  | 5.13539147  | 0.49498299  |
| H | 2.20086526  | 3.97654937  | -0.20634506 |
| H | 0.62433913  | 3.43213134  | 3.82912325  |
| H | 0.15573010  | 4.83626645  | 2.84524017  |
| H | 1.78891823  | 4.73667043  | 3.53729422  |
| H | 4.01539339  | 4.00299336  | 2.58779115  |
| H | 5.86433053  | 2.45232222  | 3.16891520  |
| H | 5.52634946  | -0.00102096 | 3.01124418  |
| H | -1.14647106 | -2.75172112 | 1.98251211  |
| H | 2.38233322  | -1.63337906 | 1.77490609  |
| H | -3.18751824 | -5.01367827 | 1.61093208  |
| H | -1.41859410 | -5.13786330 | 1.55013707  |
| H | -2.26699716 | -4.18875822 | 0.32063198  |
| H | -2.95200721 | -4.06980920 | 4.09944127  |
| H | -1.86464611 | -2.70011611 | 4.39821329  |
| H | -1.19497408 | -4.27902923 | 3.93168825  |
| H | 4.71713640  | -1.82121110 | 0.79711001  |
| H | 4.19641335  | -3.24081820 | 1.72229308  |
| H | 5.34722646  | -2.10226412 | 2.43657214  |
| H | 3.79768033  | -1.66498008 | 4.50236730  |
| H | 2.78751124  | -2.96804517 | 3.83273424  |
| H | 2.05957220  | -1.40265904 | 4.24145028  |
| H | 4.76858338  | -3.68446124 | -2.29486222 |
| H | 6.65395056  | -2.07633813 | -2.13298021 |
| H | 6.19592955  | 0.33774206  | -1.80730919 |
| H | 1.14514811  | -2.78023014 | -1.95512220 |
| H | -0.62896697 | 2.84276831  | -1.42028116 |
| H | 3.18365025  | -5.03530033 | -1.52835116 |
| H | 1.41431812  | -5.15971132 | -1.47705716 |
| H | 2.25377619  | -4.18799725 | -0.25920707 |
| H | 1.87909417  | -2.77336514 | -4.36555138 |
| H | 1.20543911  | -4.34330526 | -3.87482734 |
| H | 2.96350425  | -4.13814526 | -4.03548635 |
| H | -2.72765712 | 5.08251350  | -1.16623713 |
| H | -1.05621999 | 5.13792449  | -0.58487709 |
| H | -2.21247609 | 3.99777541  | 0.13889096  |
| H | -0.60874997 | 3.34836934  | -3.86999034 |
| H | -0.14179192 | 4.77450545  | -2.91791627 |
| H | -1.77051104 | 4.66408546  | -3.61937432 |
| H | -4.01601722 | 3.96106642  | -2.64535425 |
| H | -5.86379537 | 2.40193832  | -3.20642329 |
| H | -5.52495540 | -0.04894687 | -3.01503728 |
| H | 2.86174229  | 1.78344420  | -1.07454813 |
| H | -2.37610714 | -1.66301702 | -1.76338118 |
| H | 5.84635750  | 2.42285322  | -1.46791116 |
| H | 5.14642246  | 1.92439019  | 0.08919596  |
| H | 4.61687543  | 3.42488731  | -0.69162610 |



|   |             |             |             |
|---|-------------|-------------|-------------|
| H | 3.48265834  | 3.35090731  | -2.95286627 |
| H | 2.77056428  | 1.85081820  | -3.57602832 |
| H | 4.52743441  | 2.09073720  | -3.64479032 |
| H | -4.70107732 | -1.83740602 | -0.76256911 |
| H | -4.19135130 | -3.26937213 | -1.67478718 |
| H | -5.34737838 | -2.13795303 | -2.39218523 |
| H | -2.07399512 | -1.46764301 | -4.23587637 |
| H | -3.81420326 | -1.73339602 | -4.47820139 |
| H | -2.79850719 | -3.02691912 | -3.79865334 |
| O | -0.58216801 | -2.32525009 | -0.50532609 |
| O | 0.58518308  | -2.31710310 | 0.53798599  |

## 3.4 Structures with three oxygen atoms

 $\eta^2$ -ozone Complex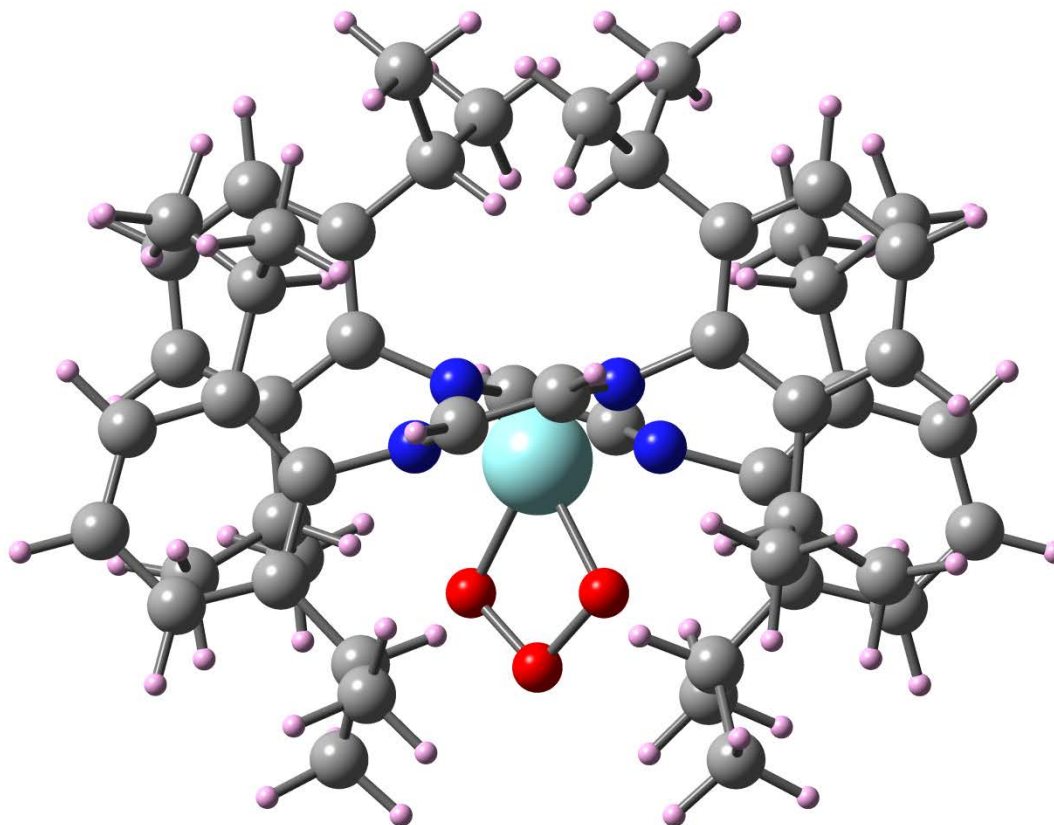Fig. S29: NCCN  $\eta^2$ -ozone Complex

| SCF          | E <sub>ZP</sub> | H            | G            |
|--------------|-----------------|--------------|--------------|
| -2515.829639 | -2514.685509    | -2514.618323 | -2514.787493 |

|   |             |             |             |
|---|-------------|-------------|-------------|
| O | 0.87026413  | -2.27262098 | 0.75443148  |
| O | -0.87171535 | -2.27291955 | -0.74974142 |
| N | 1.60736552  | -0.36371700 | -1.66917471 |
| N | -1.05971864 | 0.45557016  | -1.78677822 |
| N | -1.60718734 | -0.35884163 | 1.67041796  |
| N | 1.05967941  | 0.46080621  | 1.78531910  |
| C | 1.02619716  | -0.08787138 | -2.86164894 |
| C | -0.31479011 | 0.33130199  | -2.92211927 |
| C | -1.02633183 | -0.07847347 | 2.86200168  |
| C | 0.31461816  | 0.34088759  | 2.92106027  |
| C | 3.01939637  | -0.74852432 | -1.76217225 |
| C | 4.02153683  | 0.26568815  | -1.71204675 |
| C | 5.37100038  | -0.12248878 | -1.84885514 |
| C | 5.72826165  | -1.46347597 | -2.05278265 |

|   |             |             |             |
|---|-------------|-------------|-------------|
| C | 4.72852387  | -2.43976341 | -2.13942098 |
| C | 3.36223289  | -2.10923075 | -2.00480606 |
| C | 4.76618100  | 2.58110065  | -0.87430421 |
| C | 3.67537359  | 1.75637550  | -1.59740995 |
| C | 3.42680254  | 2.37944877  | -3.00164771 |
| C | -1.74885263 | 4.55831194  | -0.84182638 |
| C | -1.33537954 | 3.39474191  | -1.77715688 |
| C | -0.70616456 | 3.95759950  | -3.08171167 |
| C | -2.38225112 | 1.03558459  | -2.05209783 |
| C | -2.50466174 | 2.45530845  | -2.09924329 |
| C | -3.72826165 | 3.00972868  | -2.52849210 |
| C | -4.80910564 | 2.19336118  | -2.89060641 |
| C | -4.67699185 | 0.79974907  | -2.82503079 |
| C | -3.46877576 | 0.19096083  | -2.41975961 |
| C | 2.60082817  | -4.45626535 | -1.32531395 |
| C | 2.31988881  | -3.21361646 | -2.20524601 |
| C | 2.24073819  | -3.61505591 | -3.70457539 |
| C | -4.55442263 | -2.05478512 | -1.82391637 |
| C | -3.35084831 | -1.33506446 | -2.48008171 |
| C | -3.18051885 | -1.80944201 | -3.95051315 |
| C | -3.01902001 | -0.74414217 | 1.76461273  |
| C | -3.36109777 | -2.10443258 | 2.01086395  |
| C | -4.72714699 | -2.43540454 | 2.14628092  |
| C | -5.72745528 | -1.45986600 | 2.05720673  |
| C | -5.37096170 | -0.11923453 | 1.84992528  |
| C | -4.02168178 | 0.26936360  | 1.71194336  |
| C | -2.59878690 | -4.45395808 | 1.34045475  |
| C | -2.31789711 | -3.20735067 | 2.21468707  |
| C | -2.23726747 | -3.60258527 | 3.71566432  |
| C | 1.74776343  | 4.56149784  | 0.83224430  |
| C | 1.33496656  | 3.40040214  | 1.77096796  |
| C | 0.70738498  | 3.96686318  | 3.07477235  |
| C | 2.38225606  | 1.04165398  | 2.04880933  |
| C | 2.50436356  | 2.46144635  | 2.09396144  |
| C | 3.72820475  | 3.01666792  | 2.52161264  |
| C | 4.80940767  | 2.20100067  | 2.88413101  |
| C | 4.67757293  | 0.80723513  | 2.82037945  |
| C | 3.46927930  | 0.19771343  | 2.41661535  |
| C | -4.76753803 | 2.58187526  | 0.86728493  |
| C | -3.67654564 | 1.75998914  | 1.59336784  |
| C | -3.42922008 | 2.38714936  | 2.99601523  |
| C | 4.55676337  | -2.04933285 | 1.82809033  |
| C | 3.35102997  | -1.32815394 | 2.47867325  |
| C | 3.17534042  | -1.80061388 | 3.94905424  |
| H | 6.15073242  | 0.63079890  | -1.80040330 |
| H | 6.77506754  | -1.73980678 | -2.15505909 |
| H | 5.00595375  | -3.47446667 | -2.32116786 |
| H | 2.74536571  | 1.84356512  | -1.01996508 |
| H | -0.55970719 | 2.81495269  | -1.26210104 |
| H | 5.66742230  | 2.68276571  | -1.49357379 |
| H | 5.04983487  | 2.12973805  | 0.08053129  |
| H | 4.39783158  | 3.59466137  | -0.67359587 |

|   |             |             |             |
|---|-------------|-------------|-------------|
| H | 4.31971277  | 2.26767806  | -3.63119380 |
| H | 3.20957347  | 3.45263917  | -2.90865592 |
| H | 2.58509542  | 1.90993934  | -3.52078962 |
| H | -2.51630778 | 5.19453954  | -1.29945962 |
| H | -0.88285445 | 5.19610142  | -0.62843795 |
| H | -2.14391727 | 4.18442793  | 0.11030471  |
| H | -0.35955988 | 3.15159737  | -3.73944526 |
| H | 0.15327456  | 4.60088056  | -2.84956835 |
| H | -1.43874952 | 4.55550437  | -3.63997883 |
| H | -3.83559223 | 4.08961879  | -2.58606142 |
| H | -5.74318630 | 2.63949548  | -3.22369526 |
| H | -5.51474053 | 0.16996111  | -3.11118926 |
| H | 1.33858110  | -2.83657704 | -1.91522044 |
| H | -2.45750319 | -1.64841630 | -1.93549453 |
| H | 3.54234411  | -4.95097478 | -1.60067303 |
| H | 1.78977578  | -5.18530374 | -1.44399187 |
| H | 2.64607305  | -4.17628877 | -0.26769901 |
| H | 3.19556580  | -4.02832356 | -4.05716379 |
| H | 1.99311813  | -2.75481934 | -4.34077800 |
| H | 1.46516609  | -4.37868741 | -3.84932890 |
| H | -4.71176657 | -1.71492034 | -0.79492138 |
| H | -4.36530768 | -3.13577570 | -1.79765313 |
| H | -5.48601467 | -1.89691789 | -2.38467747 |
| H | -4.05169823 | -1.53316584 | -4.56060315 |
| H | -3.07336933 | -2.90158170 | -3.98181557 |
| H | -2.28842472 | -1.37161070 | -4.41632759 |
| H | -5.00403718 | -3.46980121 | 2.33056718  |
| H | -6.77409068 | -1.73657172 | 2.16021861  |
| H | -6.15109829 | 0.63351211  | 1.79968293  |
| H | -1.33710961 | -2.83084771 | 1.92226478  |
| H | 0.55851321  | 2.81964552  | 1.25822158  |
| H | -3.53940431 | -4.94846796 | 1.61925328  |
| H | -1.78685679 | -5.18167342 | 1.46119867  |
| H | -2.64583130 | -4.17873601 | 0.28165309  |
| H | -1.98983681 | -2.73961343 | 4.34820509  |
| H | -1.46103893 | -4.36506138 | 3.86298061  |
| H | -3.19161310 | -4.01506529 | 4.07047102  |
| H | 2.51608258  | 5.19852867  | 1.28732343  |
| H | 0.88167814  | 5.19902550  | 0.61844080  |
| H | 2.14143133  | 4.18512212  | -0.11947367 |
| H | 0.36139016  | 3.16270768  | 3.73508201  |
| H | -0.15220567 | 4.60967160  | 2.84189143  |
| H | 1.44072192  | 4.56612632  | 3.63057989  |
| H | 3.83542007  | 4.09666877  | 2.57748734  |
| H | 5.74358334  | 2.64774176  | 3.21614220  |
| H | 5.51565490  | 0.17801709  | 3.10676866  |
| H | -2.74625655 | 1.84632550  | 1.01624637  |
| H | 2.45935555  | -1.64177201 | 1.93140247  |
| H | -5.66919668 | 2.68472730  | 1.48574819  |
| H | -5.05035645 | 2.12748708  | -0.08636017 |
| H | -4.39977658 | 3.59508733  | 0.66378213  |
| H | -3.21295967 | 3.46029052  | 2.90021416  |

|    |             |             |             |
|----|-------------|-------------|-------------|
| H  | -2.58730012 | 1.91983833  | 3.51681018  |
| H  | -4.32230021 | 2.27623933  | 3.62546957  |
| H  | 4.71976964  | -1.70944831 | 0.79996910  |
| H  | 4.36616897  | -3.13002478 | 1.80062049  |
| H  | 5.48574585  | -1.89314445 | 2.39364075  |
| H  | 2.28132199  | -1.36272419 | 4.41102039  |
| H  | 4.04424962  | -1.52308237 | 4.56185686  |
| H  | 3.06855108  | -2.89275345 | 3.98137911  |
| O  | -0.00122216 | -3.24747436 | 0.00281939  |
| H  | -0.75465769 | 0.58005173  | -3.88526335 |
| H  | 1.59612234  | -0.19095646 | -3.78237105 |
| H  | -1.59635061 | -0.17834577 | 3.78300849  |
| H  | 0.75436882  | 0.59337878  | 3.88328484  |
| Zr | -0.00007131 | -0.52922965 | 0.00061249  |

**Oxo Complex with adsorbed O<sub>2</sub> molecule (planar conformation)**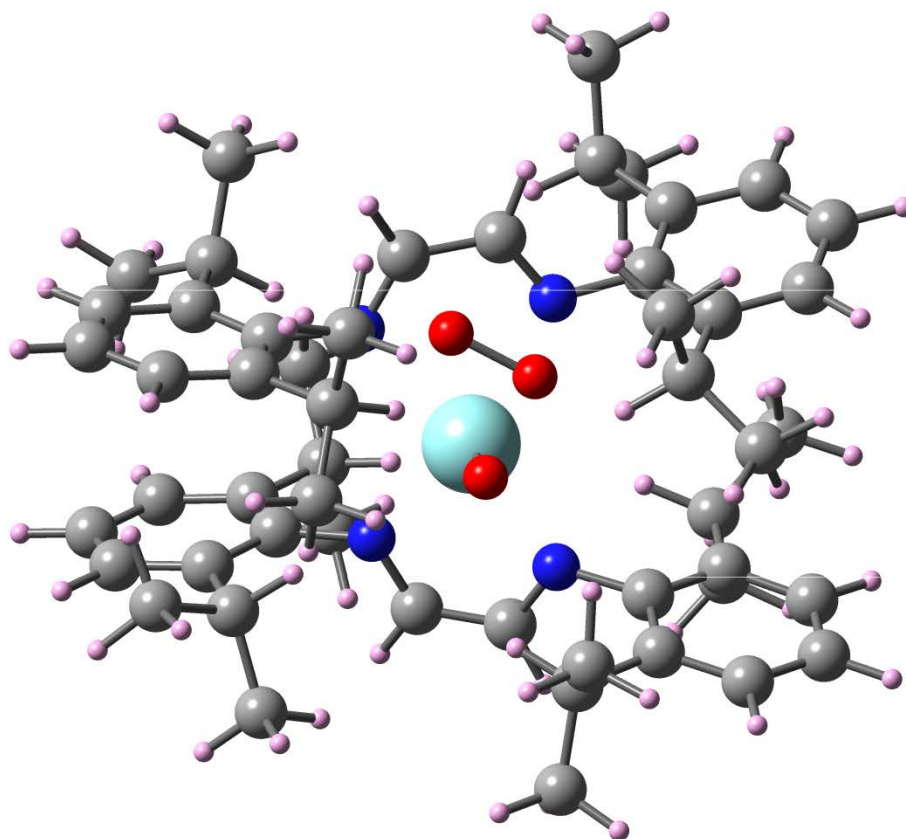Fig. S30: NCCN Oxo Complex with adsorbed O<sub>2</sub> molecule (planar conformation)

| SCF          | E <sub>ZP</sub> | H            | G            |
|--------------|-----------------|--------------|--------------|
| -2515.882611 | -2514.739447    | -2514.671079 | -2514.843141 |

|   |             |             |             |
|---|-------------|-------------|-------------|
| O | 0.33839006  | -0.63519398 | 1.72199613  |
| O | 1.05881207  | 0.83376115  | -1.92615116 |
| O | -0.16587005 | 1.46813716  | -1.73809214 |
| N | -1.48379415 | 1.52960612  | 1.09278808  |
| N | 1.32119205  | 1.97540625  | 0.67480404  |
| N | 1.36964518  | -1.94777305 | -0.73947507 |
| N | -1.32568704 | -1.52238011 | -1.21362410 |
| C | -0.86225514 | 2.59124622  | 1.51223911  |
| C | 0.54877596  | 2.86342029  | 1.21848508  |
| C | 0.69663615  | -2.78633914 | -1.56037913 |
| C | -0.66452496 | -2.55274616 | -1.81902315 |
| C | -2.85593125 | 1.38789707  | 1.59416412  |
| C | -3.92497335 | 1.85442907  | 0.78219105  |
| C | -5.22832044 | 1.77801002  | 1.31354809  |
| C | -5.45803247 | 1.27640998  | 2.60484819  |
| C | -4.38167335 | 0.83669198  | 3.38804325  |

|   |             |             |             |
|---|-------------|-------------|-------------|
| C | -3.05480425 | 0.87811102  | 2.90668821  |
| C | -4.81940643 | 2.29794208  | -1.58831213 |
| C | -3.66876435 | 2.51333313  | -0.57892305 |
| C | -3.41665538 | 4.03966625  | -0.41091604 |
| C | 2.33307707  | 3.77319341  | -2.96618224 |
| C | 2.01641504  | 3.98705242  | -1.46396912 |
| C | 1.92007199  | 5.50137155  | -1.13284110 |
| C | 2.71553815  | 2.34477531  | 0.44743603  |
| C | 3.04638014  | 3.29498540  | -0.55975305 |
| C | 4.41171923  | 3.61841547  | -0.72058906 |
| C | 5.40167932  | 3.03858945  | 0.08334400  |
| C | 5.04355333  | 2.12021737  | 1.08330307  |
| C | 3.69908624  | 1.75599430  | 1.29269609  |
| C | -2.13895112 | -0.97507209 | 4.42230233  |
| C | -1.90130115 | 0.43007903  | 3.81574929  |
| C | -1.66595316 | 1.46893511  | 4.94659737  |
| C | 4.36419435  | -0.20744783 | 2.81512320  |
| C | 3.30254124  | 0.86083722  | 2.47143918  |
| C | 3.01512019  | 1.73841028  | 3.72406028  |
| C | 2.70877629  | -2.35219004 | -0.34425203 |
| C | 2.86684733  | -3.18429010 | 0.80206905  |
| C | 4.16790845  | -3.61128909 | 1.14119208  |
| C | 5.28202152  | -3.23335603 | 0.37607502  |
| C | 5.10683348  | -2.42242197 | -0.75526007 |
| C | 3.82582336  | -1.97249798 | -1.14186810 |
| C | 1.83299426  | -3.38979615 | 3.13762123  |
| C | 1.67161726  | -3.67824518 | 1.62497912  |
| C | 1.42759628  | -5.19064730 | 1.37069310  |
| C | -2.31788219 | 1.01439606  | -4.37062334 |
| C | -2.02504613 | -0.43274804 | -3.89992930 |
| C | -1.92261109 | -1.38570112 | -5.12179440 |
| C | -2.72699015 | -1.42499914 | -1.59859313 |
| C | -3.06932619 | -0.93746511 | -2.89431123 |
| C | -4.42679829 | -0.96194916 | -3.28173326 |
| C | -5.42139234 | -1.44324723 | -2.42014719 |
| C | -5.06878131 | -1.91938526 | -1.14706810 |
| C | -3.72573221 | -1.93534621 | -0.71678206 |
| C | 4.65746937  | 0.01884820  | -2.52872820 |
| C | 3.66623933  | -1.16615092 | -2.43564519 |
| C | 3.81443137  | -2.09319699 | -3.67371429 |
| C | -4.47631125 | -2.51249728 | 1.67894412  |
| C | -3.34981816 | -2.58294425 | 0.62228804  |
| C | -2.93765409 | -4.06847135 | 0.41336902  |
| H | -6.06811854 | 2.11982502  | 0.71697705  |
| H | -6.47082650 | 1.23290094  | 2.99827222  |
| H | -4.56904735 | 0.45466994  | 4.38811332  |
| H | -2.75927926 | 2.07074713  | -1.00696608 |
| H | 1.03128198  | 3.54211435  | -1.29856911 |
| H | -5.72225951 | 2.85049009  | -1.29495111 |
| H | -5.07510042 | 1.23934699  | -1.68718014 |
| H | -4.51886342 | 2.66769712  | -2.57654021 |
| H | -4.29492246 | 4.52785726  | 0.03231299  |

|   |             |             |             |
|---|-------------|-------------|-------------|
| H | -3.22604638 | 4.49979229  | -1.38921412 |
| H | -2.55492332 | 4.25255330  | 0.23295101  |
| H | 3.29987113  | 4.21124748  | -3.24698525 |
| H | 1.55824600  | 4.24894643  | -3.58182428 |
| H | 2.34647311  | 2.70437633  | -3.20224025 |
| H | 1.64866396  | 5.67359155  | -0.08192701 |
| H | 1.16031091  | 5.98037555  | -1.76452414 |
| H | 2.87621805  | 6.00999360  | -1.31240011 |
| H | 4.69775524  | 4.33205353  | -1.48860912 |
| H | 6.44599538  | 3.30353751  | -0.06319401 |
| H | 5.81486838  | 1.68602537  | 1.71116812  |
| H | -0.98709107 | 0.34036105  | 3.22051924  |
| H | 2.37107019  | 0.33694215  | 2.22348116  |
| H | -3.02677219 | -1.00928112 | 5.06831238  |
| H | -1.27073905 | -1.26361009 | 5.02838937  |
| H | -2.25443411 | -1.72308315 | 3.63100627  |
| H | -2.54804223 | 1.55833009  | 5.59528739  |
| H | -1.44866518 | 2.46886319  | 4.54624134  |
| H | -0.81587808 | 1.16273312  | 5.57045041  |
| H | 4.63333539  | -0.80600486 | 1.93867114  |
| H | 3.96494434  | -0.89056989 | 3.57477426  |
| H | 5.27995341  | 0.23937824  | 3.22686924  |
| H | 3.91731224  | 2.28337135  | 4.03453730  |
| H | 2.69083819  | 1.10471222  | 4.55951134  |
| H | 2.22405010  | 2.47641931  | 3.53691226  |
| H | 4.30778848  | -4.25109714 | 2.00922414  |
| H | 6.27649160  | -3.57549202 | 0.65388704  |
| H | 5.97151056  | -2.14470392 | -1.35292311 |
| H | 0.78505817  | -3.12736216 | 1.30273409  |
| H | -1.04768805 | -0.41500601 | -3.41143527 |
| H | 2.72710434  | -3.86872016 | 3.55997526  |
| H | 0.95981221  | -3.77125020 | 3.68458327  |
| H | 1.88782023  | -2.30971606 | 3.30710825  |
| H | 1.26897128  | -5.39619832 | 0.30381701  |
| H | 0.53872523  | -5.53116736 | 1.91924514  |
| H | 2.28293237  | -5.79406732 | 1.70430112  |
| H | -3.28635127 | 1.08845303  | -4.88367138 |
| H | -1.53938215 | 1.34439811  | -5.07102740 |
| H | -2.31726222 | 1.70720411  | -3.52234028 |
| H | -1.67355904 | -2.40945018 | -4.81463638 |
| H | -1.14109504 | -1.03774606 | -5.81051246 |
| H | -2.86909216 | -1.42522915 | -5.67761446 |
| H | -4.70372933 | -0.60189914 | -4.26974333 |
| H | -6.46161146 | -1.45515026 | -2.73763922 |
| H | -5.84513436 | -2.29803931 | -0.48973305 |
| H | 2.65646424  | -0.74793692 | -2.45963119 |
| H | -2.47350511 | -2.05561918 | 1.02262607  |
| H | 5.69890548  | -0.32333979 | -2.60052621 |
| H | 4.57547534  | 0.67623425  | -1.65653114 |
| H | 4.44300033  | 0.61554724  | -3.42535927 |
| H | 3.67096434  | -1.51939495 | -4.59933136 |
| H | 3.07448734  | -2.90361307 | -3.65751429 |



|    |             |             |             |
|----|-------------|-------------|-------------|
| H  | 4.81274346  | -2.55031599 | -3.70725329 |
| H  | -4.84805931 | -1.49117122 | 1.81088113  |
| H  | -4.09919721 | -2.86449429 | 2.64732819  |
| H  | -5.32289330 | -3.15855135 | 1.40932810  |
| H  | -2.07850102 | -4.16190033 | -0.25846003 |
| H  | -3.77255713 | -4.64208942 | -0.01220701 |
| H  | -2.66499405 | -4.52429437 | 1.37488510  |
| H  | -1.36876519 | 3.32064526  | 2.14866216  |
| H  | 0.93241296  | 3.84114437  | 1.51946611  |
| H  | 1.18942822  | -3.65944419 | -1.98440916 |
| H  | -1.20414698 | -3.21198023 | -2.49612320 |
| Zr | 0.12715903  | -0.15021095 | -0.03078601 |

**Oxo Complex with adsorbed O<sub>2</sub> molecule (butterfly conformation)**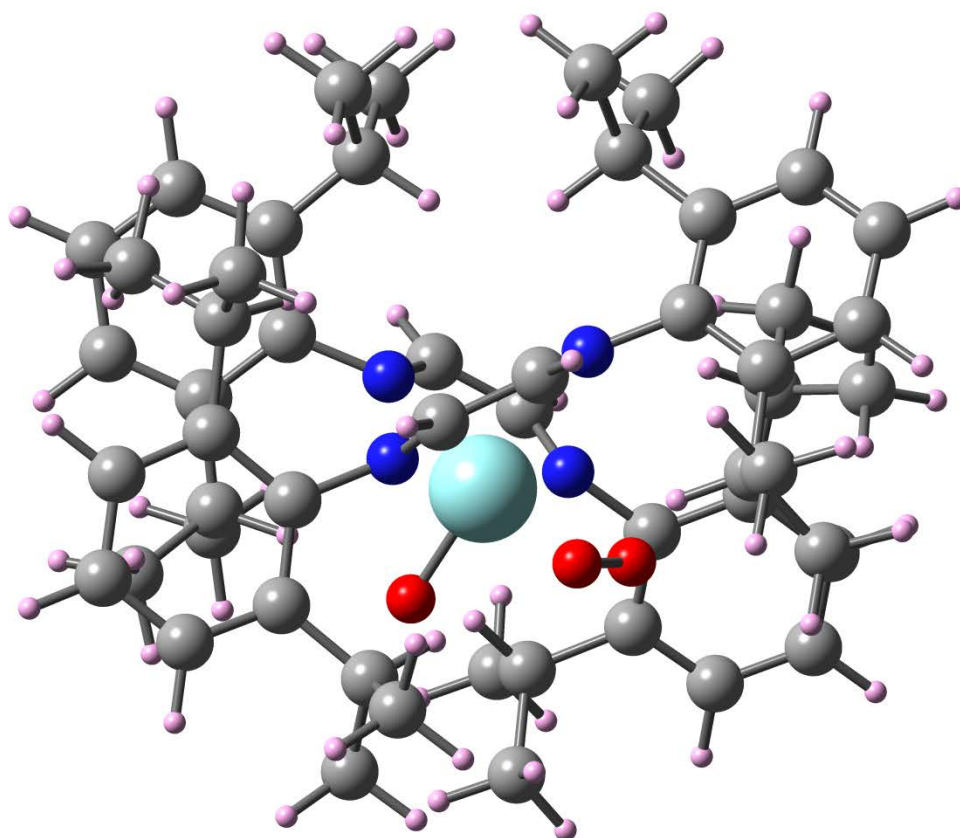Fig. S31: Oxo Complex with adsorbed O<sub>2</sub> molecule (butterfly conformation)

| SCF          | E <sub>ZP</sub> | H            | G            |
|--------------|-----------------|--------------|--------------|
| -2515.880514 | -2514.737713    | -2514.670084 | -2514.841005 |

|   |             |             |             |
|---|-------------|-------------|-------------|
| O | 1.92222643  | -0.93755290 | 1.57527623  |
| N | -1.12504524 | -0.73570461 | -1.67821995 |
| N | 1.28123169  | -1.96615475 | -0.99492076 |
| N | -1.35127496 | 1.17476159  | 1.51546020  |
| N | 1.29082724  | 2.16059554  | 0.56406027  |
| C | -0.42580173 | -1.47535429 | -2.58989370 |
| C | 0.78554140  | -2.10072024 | -2.24692488 |
| C | -0.77526333 | 2.28630627  | 1.87394385  |
| C | 0.57077937  | 2.73272413  | 1.47958046  |
| C | -2.46201086 | -0.38363291 | -2.16580002 |
| C | -3.57937024 | -1.18958220 | -1.78883711 |
| C | -4.82936684 | -0.93252873 | -2.39345776 |
| C | -4.98572199 | 0.06896526  | -3.36187140 |
| C | -3.88182361 | 0.85091257  | -3.72539065 |
| C | -2.61400734 | 0.64786187  | -3.13944026 |
| C | -4.58694031 | -2.46625288 | 0.19957921  |

|   |             |             |             |
|---|-------------|-------------|-------------|
| C | -3.44928200 | -2.39083400 | -0.84813937 |
| C | -3.38304635 | -3.70686128 | -1.67234029 |
| C | 0.53479930  | -5.13687338 | 1.57214228  |
| C | 0.75628157  | -4.65998861 | 0.11456087  |
| C | 0.45834759  | -5.80263872 | -0.89316344 |
| C | 2.41390618  | -2.80947979 | -0.63846798 |
| C | 2.16877251  | -4.10430832 | -0.09856172 |
| C | 3.27827594  | -4.91684619 | 0.21970526  |
| C | 4.59137677  | -4.47251353 | 0.01295661  |
| C | 4.81515137  | -3.19432808 | -0.52061727 |
| C | 3.74070868  | -2.34330063 | -0.85274236 |
| C | -1.75420015 | 3.02614880  | -3.47942120 |
| C | -1.44508362 | 1.51421774  | -3.62309870 |
| C | -1.07725706 | 1.18347765  | -5.09568539 |
| C | 5.20769449  | -0.23971715 | -0.80386217 |
| C | 4.02203876  | -0.97261734 | -1.47448591 |
| C | 4.27276618  | -1.10493656 | -3.00267926 |
| C | -2.71814260 | 0.98285706  | 2.03846854  |
| C | -2.91223910 | 0.14200239  | 3.16922467  |
| C | -4.22969101 | -0.01691477 | 3.64769287  |
| C | -5.31222048 | 0.63769517  | 3.04536882  |
| C | -5.08939492 | 1.49147314  | 1.95639309  |
| C | -3.79447184 | 1.69397436  | 1.43315115  |
| C | -1.99220193 | -1.98428212 | 4.27224003  |
| C | -1.75873400 | -0.48806817 | 3.95675240  |
| C | -1.50192203 | 0.32518519  | 5.25651366  |
| C | 2.38193701  | 2.66602213  | -3.43247299 |
| C | 1.90031938  | 3.20212127  | -2.06357699 |
| C | 1.44307332  | 4.68464925  | -2.17811710 |
| C | 2.63599780  | 2.64496160  | 0.34266863  |
| C | 2.96428345  | 3.09138452  | -0.97062582 |
| C | 4.26537508  | 3.56885940  | -1.21464647 |
| C | 5.22896260  | 3.59790289  | -0.19505794 |
| C | 4.89364195  | 3.14913885  | 1.08863825  |
| C | 3.60227435  | 2.67086006  | 1.39880584  |
| C | -4.75224895 | 2.63603390  | -0.75497735 |
| C | -3.60551659 | 2.69426295  | 0.28230123  |
| C | -3.49005996 | 4.15221213  | 0.81452049  |
| C | 4.30963530  | 1.03585741  | 3.22909544  |
| C | 3.34776199  | 2.18726857  | 2.83495847  |
| C | 3.45336492  | 3.36160917  | 3.84561864  |
| H | -0.84392284 | -1.64242022 | -3.58110361 |
| H | 1.28830992  | -2.73622449 | -2.97420098 |
| H | -1.29207804 | 2.96445093  | 2.55720742  |
| H | 0.93196826  | 3.61176547  | 2.02390447  |
| H | -5.68244516 | -1.54725581 | -2.11933156 |
| H | -5.95332274 | 0.23408559  | -3.83008524 |
| H | -4.00293992 | 1.62384946  | -4.48077159 |
| H | -2.51617023 | -2.30802954 | -0.29027368 |
| H | 0.03355162  | -3.85983757 | -0.05821945 |
| H | -5.56401963 | -2.67660988 | -0.25776763 |
| H | -4.66744719 | -1.53238616 | 0.76851880  |

|   |             |             |             |
|---|-------------|-------------|-------------|
| H | -4.37400516 | -3.27457043 | 0.91091592  |
| H | -4.30377325 | -3.86130762 | -2.25251229 |
| H | -3.25397508 | -4.56585856 | -1.00022701 |
| H | -2.53792974 | -3.69579714 | -2.37260548 |
| H | 1.20421819  | -5.96535459 | 1.84155072  |
| H | -0.49940689 | -5.48314791 | 1.69873660  |
| H | 0.69893269  | -4.31211834 | 2.27447024  |
| H | 0.57128475  | -5.45973298 | -1.93030655 |
| H | -0.57045480 | -6.16550419 | -0.76409126 |
| H | 1.13852016  | -6.65282426 | -0.74570255 |
| H | 3.10752399  | -5.90875660 | 0.63092637  |
| H | 5.43269562  | -5.11484287 | 0.26354471  |
| H | 5.83529642  | -2.85437634 | -0.67745769 |
| H | -0.57015145 | 1.28968860  | -3.00257516 |
| H | 3.12822743  | -0.35121824 | -1.33615563 |
| H | -2.63503979 | 3.31567372  | -4.06590763 |
| H | -0.90912664 | 3.62423955  | -3.84138368 |
| H | -1.94346785 | 3.29666759  | -2.43281986 |
| H | -1.92194708 | 1.38630235  | -5.76708299 |
| H | -0.80407883 | 0.12791047  | -5.21286054 |
| H | -0.22676761 | 1.79261867  | -5.43038502 |
| H | 5.07769215  | -0.18943481 | 0.28299347  |
| H | 5.28113518  | 0.78526206  | -1.18568678 |
| H | 6.16373515  | -0.73868916 | -1.01074771 |
| H | 5.13632163  | -1.75524915 | -3.19667628 |
| H | 4.48176638  | -0.12207730 | -3.44765375 |
| H | 3.40524936  | -1.53638518 | -3.51675936 |
| H | -4.40268055 | -0.65563993 | 4.50883615  |
| H | -6.31966802 | 0.49436166  | 3.42831419  |
| H | -5.93086038 | 2.00686624  | 1.50404437  |
| H | -0.84900151 | -0.44097241 | 3.35687853  |
| H | 1.03138901  | 2.60708605  | -1.75700258 |
| H | -2.87521028 | -2.14555919 | 4.90565457  |
| H | -1.12254210 | -2.38671186 | 4.80861261  |
| H | -2.10266084 | -2.54458289 | 3.33913697  |
| H | -1.28234853 | 1.38029220  | 5.03967262  |
| H | -0.64448768 | -0.09519587 | 5.79774071  |
| H | -2.37431759 | 0.29682272  | 5.92346042  |
| H | 3.20956627  | 3.26227337  | -3.83749824 |
| H | 1.56399836  | 2.70509004  | -4.16232872 |
| H | 2.71832831  | 1.62537052  | -3.35497081 |
| H | 1.03756763  | 5.05158665  | -1.22587643 |
| H | 0.66739679  | 4.79724415  | -2.94431274 |
| H | 2.28803980  | 5.32987669  | -2.45160224 |
| H | 4.52387471  | 3.93284380  | -2.20511626 |
| H | 6.23040392  | 3.96850307  | -0.39902612 |
| H | 5.64757810  | 3.16589917  | 1.87097594  |
| H | -2.67558124 | 2.44714769  | -0.24557138 |
| H | 2.34228311  | 1.76807599  | 2.91246246  |
| H | -5.68419986 | 3.04974417  | -0.34741938 |
| H | -4.94274481 | 1.61278466  | -1.08743978 |
| H | -4.48855412 | 3.23395218  | -1.63578292 |

|    |             |             |             |
|----|-------------|-------------|-------------|
| H  | -3.38936318 | 4.85416038  | -0.02419096 |
| H  | -2.63042590 | 4.29693809  | 1.47970412  |
| H  | -4.39217087 | 4.42494313  | 1.37766324  |
| H  | 4.17299510  | 0.17328126  | 2.56830681  |
| H  | 4.09381854  | 0.70685735  | 4.25391886  |
| H  | 5.36173697  | 1.34722602  | 3.19011038  |
| H  | 2.75573014  | 4.17539185  | 3.60288769  |
| H  | 4.46425940  | 3.78939348  | 3.85886264  |
| H  | 3.22667672  | 3.00746612  | 4.85973331  |
| O  | -0.97118671 | -1.98383446 | 1.20095239  |
| O  | 1.11221247  | -0.10595900 | 2.33058229  |
| Zr | -0.00178159 | -0.68518074 | 0.41893618  |

### 3.5 Structures with four oxygen atoms

#### Peroxo Complex with adsorbed O<sub>2</sub> molecule (spiro conformation)

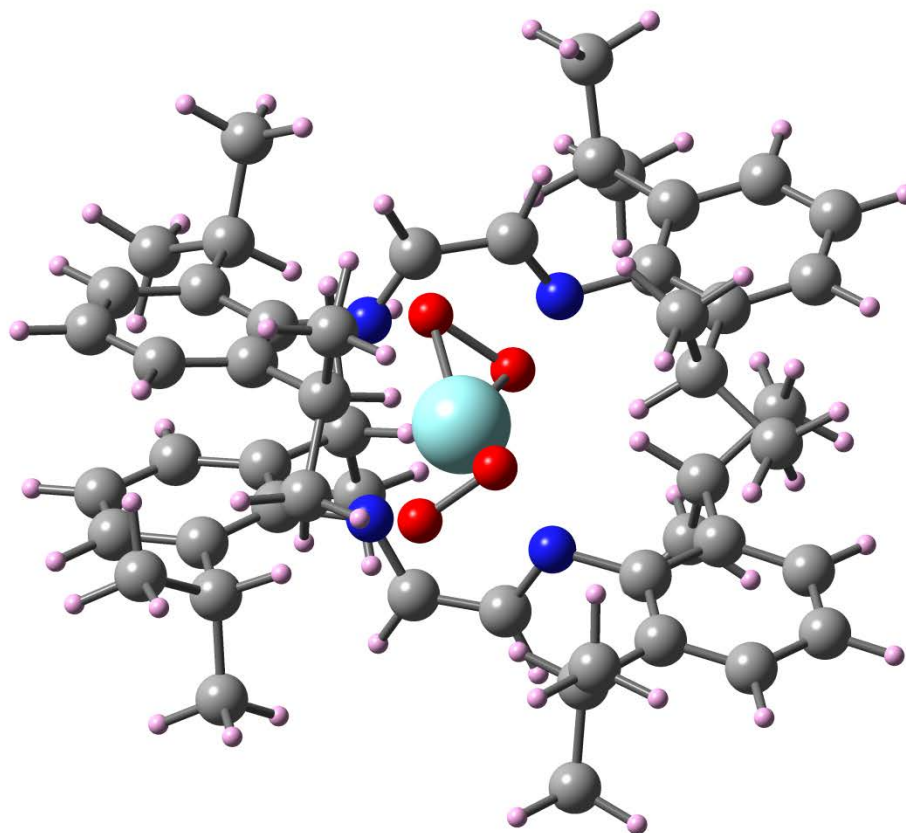

Fig. S32: NCCN Peroxo Complex with adsorbed O<sub>2</sub> molecule (spiro conformation)

| SCF          | E <sub>ZP</sub> | H            | G            |
|--------------|-----------------|--------------|--------------|
| -2591.047482 | -2589.901060    | -2589.831764 | -2590.004766 |

|    |             |             |             |
|----|-------------|-------------|-------------|
| Zr | -0.01983603 | -0.12989405 | -0.12307007 |
| O  | 0.53380301  | 0.18099398  | 2.04861610  |
| O  | -0.56444507 | -0.66936110 | 2.08646410  |
| O  | -0.51629408 | 0.82748602  | -1.85772320 |
| O  | 0.68116302  | -0.12033404 | -2.04491622 |
| N  | 1.32067509  | -2.01914718 | 0.10324795  |
| N  | -1.37201211 | -1.88926020 | -0.61873811 |
| N  | -1.36930616 | 1.88325609  | 0.64761399  |
| N  | 1.42140706  | 1.99580313  | -0.04677506 |
| C  | 0.62491705  | -3.15143027 | -0.17690007 |
| C  | -0.72575706 | -3.08547428 | -0.55705710 |
| C  | -0.67738911 | 2.98155218  | 0.66828999  |
| C  | 0.72925799  | 3.05121520  | 0.24775496  |
| C  | 2.69540320  | -2.22315718 | 0.53691398  |

|   |             |             |             |
|---|-------------|-------------|-------------|
| C | 3.75306028  | -2.08611616 | -0.41135009 |
| C | 5.07227838  | -2.34438316 | 0.01627494  |
| C | 5.34731642  | -2.74823519 | 1.33249304  |
| C | 4.29528133  | -2.90146421 | 2.24539711  |
| C | 2.95704522  | -2.64733721 | 1.87304108  |
| C | 4.57741533  | -0.94252106 | -2.56743426 |
| C | 3.46986425  | -1.77870314 | -1.88586421 |
| C | 3.24981525  | -3.10108224 | -2.67398227 |
| C | -2.02214918 | -0.68912312 | -4.55973441 |
| C | -1.81287215 | -1.83932020 | -3.54379133 |
| C | -1.62352712 | -3.19402930 | -4.27960839 |
| C | -2.73728922 | -1.94964921 | -1.12364015 |
| C | -2.95944024 | -1.93560222 | -2.53054925 |
| C | -4.28429034 | -2.07644624 | -2.99728429 |
| C | -5.35867341 | -2.22710127 | -2.10848622 |
| C | -5.12060340 | -2.24948127 | -0.72518012 |
| C | -3.81456730 | -2.12195324 | -0.20640308 |
| C | 2.05373715  | -2.03200417 | 4.18534426  |
| C | 1.84916314  | -2.88453324 | 2.90716016  |
| C | 1.74161315  | -4.39085636 | 3.26850719  |
| C | -4.65207337 | -1.57437321 | 2.16498411  |
| C | -3.57262528 | -2.26770825 | 1.30074604  |
| C | -3.47380826 | -3.76979336 | 1.69040407  |
| C | -2.75532526 | 1.99425908  | 1.11866202  |
| C | -3.01655628 | 2.05632509  | 2.51527613  |
| C | -4.36194439 | 2.20791209  | 2.91665516  |
| C | -5.39810748 | 2.30335608  | 1.97851909  |
| C | -5.10688645 | 2.26114208  | 0.60573499  |
| C | -3.78393634 | 2.11480108  | 0.14256495  |
| C | -2.17435921 | 0.88318701  | 4.62713630  |
| C | -1.92387720 | 2.00975509  | 3.59271121  |
| C | -1.79487320 | 3.38542720  | 4.30264227  |
| C | 2.17804911  | 2.06490414  | -4.15598538 |
| C | 1.91464709  | 2.86652320  | -2.85609228 |
| C | 1.72746406  | 4.37578531  | -3.17214030 |
| C | 2.79811716  | 2.23077716  | -0.49055610 |
| C | 3.03150917  | 2.66366020  | -1.82383720 |
| C | 4.36843827  | 2.93504423  | -2.18897323 |
| C | 5.42189035  | 2.78360323  | -1.27712816 |
| C | 5.15863434  | 2.35615919  | 0.03433094  |
| C | 3.84475424  | 2.07509616  | 0.45916197  |
| C | -4.57401140 | 1.61334503  | -2.25437623 |
| C | -3.46656432 | 2.20680409  | -1.35463116 |
| C | -3.20885831 | 3.68812521  | -1.75529919 |
| C | 4.67083232  | 0.87945208  | 2.58306414  |
| C | 3.55205622  | 1.71435013  | 1.91983709  |
| C | 3.29466519  | 3.00042322  | 2.75558215  |
| H | 1.11381809  | -4.12111434 | -0.10152007 |
| H | -1.25410508 | -3.99746136 | -0.82728212 |
| H | -1.12779916 | 3.91897725  | 1.00297901  |
| H | 1.16724702  | 4.05042128  | 0.18782195  |
| H | 5.89045442  | -2.24402915 | -0.69085911 |

|   |             |             |             |
|---|-------------|-------------|-------------|
| H | 6.37116750  | -2.95125620 | 1.63853307  |
| H | 4.51111435  | -3.22891224 | 3.25977119  |
| H | 2.53941117  | -1.20614810 | -1.94799221 |
| H | -0.88743508 | -1.61488317 | -3.00864629 |
| H | 5.50881740  | -1.51319110 | -2.68690727 |
| H | 4.80199733  | -0.03121899 | -2.00267621 |
| H | 4.24789830  | -0.64544204 | -3.57141333 |
| H | 4.14982033  | -3.73095528 | -2.63928326 |
| H | 3.02483023  | -2.88031023 | -3.72594534 |
| H | 2.41248919  | -3.67777130 | -2.26493823 |
| H | -2.93381825 | -0.82417113 | -5.15836146 |
| H | -1.16977111 | -0.64531910 | -5.25059546 |
| H | -2.07747219 | 0.27112696  | -4.03643237 |
| H | -1.42791010 | -4.01032536 | -3.57170133 |
| H | -0.77241006 | -3.13331729 | -4.97118544 |
| H | -2.51531319 | -3.46230833 | -4.86282443 |
| H | -4.47200735 | -2.07315824 | -4.06824137 |
| H | -6.37186548 | -2.33568628 | -2.48918225 |
| H | -5.95549247 | -2.38044429 | -0.04221906 |
| H | 0.89293407  | -2.58141823 | 2.47386213  |
| H | -2.60847021 | -1.80595121 | 1.53677806  |
| H | 2.99414322  | -2.28061918 | 4.69553630  |
| H | 1.23154009  | -2.21058419 | 4.89128332  |
| H | 2.06217414  | -0.96420609 | 3.93956124  |
| H | 2.66484022  | -4.75612038 | 3.73787123  |
| H | 1.55497814  | -5.00419541 | 2.37747112  |
| H | 0.91627809  | -4.55500038 | 3.97449824  |
| H | -4.79002239 | -0.52767813 | 1.87535608  |
| H | -4.35476735 | -1.59969421 | 3.22187219  |
| H | -5.62355043 | -2.08133426 | 2.08833710  |
| H | -4.40795732 | -4.29542742 | 1.44955005  |
| H | -3.29124124 | -3.87235037 | 2.76876715  |
| H | -2.65607119 | -4.27099839 | 1.16002803  |
| H | -4.59509141 | 2.25230308  | 3.97713924  |
| H | -6.42639053 | 2.41716808  | 2.31277511  |
| H | -5.91423549 | 2.35050108  | -0.11388307 |
| H | -0.96178212 | 1.78712109  | 3.12396918  |
| H | 0.97510102  | 2.47824116  | -2.45398725 |
| H | -3.11365928 | 1.03224301  | 5.17564634  |
| H | -1.35739514 | 0.86316501  | 5.36018336  |
| H | -2.20691820 | -0.09327407 | 4.13298126  |
| H | -1.57242320 | 4.19216727  | 3.59062721  |
| H | -0.98703214 | 3.35409121  | 5.04546933  |
| H | -2.72258327 | 3.65326121  | 4.82465431  |
| H | 3.10621618  | 2.37581317  | -4.65432142 |
| H | 1.34972305  | 2.22081115  | -4.85952643 |
| H | 2.23006513  | 0.99487606  | -3.93313036 |
| H | 1.49467003  | 4.95805036  | -2.26921223 |
| H | 0.90408899  | 4.51249932  | -3.88555836 |
| H | 2.63422712  | 4.80709335  | -3.61715433 |
| H | 4.58139428  | 3.26500426  | -3.20227631 |
| H | 6.44280042  | 2.99731526  | -1.58433618 |



|   |             |             |             |
|---|-------------|-------------|-------------|
| H | 5.98018642  | 2.24406720  | 0.73495200  |
| H | -2.54530524 | 1.64825706  | -1.55710318 |
| H | 2.63602716  | 1.11317708  | 1.94820309  |
| H | -5.48784150 | 2.22301808  | -2.23403123 |
| H | -4.82972341 | 0.59138996  | -1.95864921 |
| H | -4.22531837 | 1.58406404  | -3.29395631 |
| H | -2.95641330 | 3.74900222  | -2.82152227 |
| H | -2.37998025 | 4.13327825  | -1.19010515 |
| H | -4.10361439 | 4.30007725  | -1.57711318 |
| H | 4.92139734  | -0.00348199 | 1.98721609  |
| H | 4.33793029  | 0.53575904  | 3.57059721  |
| H | 5.58486736  | 1.46983313  | 2.73398415  |
| H | 2.45842312  | 3.59109326  | 2.36011412  |
| H | 4.18507225  | 3.64349728  | 2.75982315  |
| H | 3.05816018  | 2.73527720  | 3.79426623  |

Peroxo Complex with adsorbed O<sub>2</sub> molecule (butterfly conformation)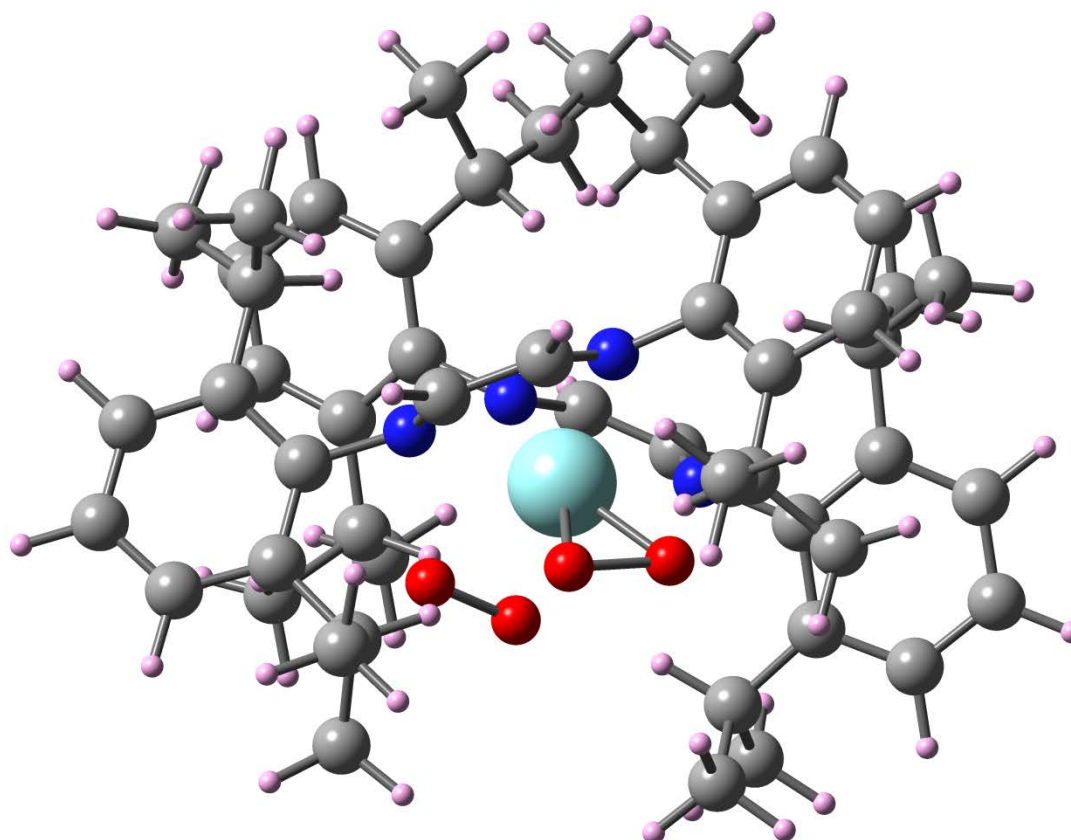Fig. S33: Peroxo Complex with adsorbed O<sub>2</sub> molecule (butterfly conformation)

| SCF          | E <sub>ZP</sub> | H            | G            |
|--------------|-----------------|--------------|--------------|
| -2591.014790 | -2589.868427    | -2589.799229 | -2589.973499 |

|   |             |             |             |
|---|-------------|-------------|-------------|
| O | -1.71295445 | -2.08128511 | 0.41002262  |
| N | 1.02892329  | 1.42470920  | 1.37281255  |
| N | -1.66813903 | 0.41988329  | 1.76857367  |
| N | 1.59873035  | -1.16168300 | -1.48526831 |
| N | -0.99408583 | -0.21131483 | -1.92401199 |
| C | 0.31184807  | 1.66453579  | 2.43331524  |
| C | -1.05470794 | 1.16406282  | 2.63565158  |
| C | 1.08352173  | -1.13236002 | -2.73371036 |
| C | -0.21939475 | -0.64591124 | -2.95410596 |
| C | 2.36016352  | 2.05838324  | 1.40848656  |
| C | 3.35875452  | 1.56611244  | 2.29851033  |
| C | 4.57173771  | 2.28670085  | 2.37689475  |
| C | 4.78375372  | 3.45889414  | 1.64084722  |
| C | 3.77751689  | 3.93171020  | 0.78708188  |
| C | 2.55632891  | 3.24324616  | 0.64762024  |
| C | 4.29438218  | -0.71945852 | 2.92649667  |

|   |             |             |             |
|---|-------------|-------------|-------------|
| C | 3.19096836  | 0.33457124  | 3.19813864  |
| C | 3.18526705  | 0.74337255  | 4.69691416  |
| C | -2.41728854 | -3.47630909 | 3.35450229  |
| C | -2.18492083 | -1.95689961 | 3.54512808  |
| C | -2.04006860 | -1.61612714 | 5.05447870  |
| C | -3.05043671 | 0.03508470  | 2.10111407  |
| C | -3.29287080 | -1.10687158 | 2.91448676  |
| C | -4.63705843 | -1.42671157 | 3.20648772  |
| C | -5.69851283 | -0.64964033 | 2.72847295  |
| C | -5.43095812 | 0.49054699  | 1.95670291  |
| C | -4.11023420 | 0.86285670  | 1.63344160  |
| C | 1.95925261  | 4.37535172  | -1.57351800 |
| C | 1.44427250  | 3.85419511  | -0.20962890 |
| C | 0.73767552  | 4.99345570  | 0.57842478  |
| C | -5.00327700 | 2.55026445  | -0.08655972 |
| C | -3.84995211 | 2.16744135  | 0.86952677  |
| C | -3.60355092 | 3.34872343  | 1.85229986  |
| C | 2.96768092  | -1.67350087 | -1.37831172 |
| C | 3.19441648  | -3.04230346 | -1.05646023 |
| C | 4.52604470  | -3.49837215 | -0.95167096 |
| C | 5.61165014  | -2.64613216 | -1.18500157 |
| C | 5.37398817  | -1.31410952 | -1.55189713 |
| C | 4.06326241  | -0.80307942 | -1.66054531 |
| C | 2.09116240  | -4.72717605 | 0.51450257  |
| C | 2.06982473  | -4.06571586 | -0.88629821 |
| C | 2.12644417  | -5.13758455 | -2.00884045 |
| C | -1.87714652 | 3.98585867  | -2.10096591 |
| C | -1.40228364 | 2.62249555  | -2.66058828 |
| C | -0.75856802 | 2.81803167  | -4.06261814 |
| C | -2.32162648 | 0.21679205  | -2.38453508 |
| C | -2.52624432 | 1.58364136  | -2.73978762 |
| C | -3.76647532 | 1.96678233  | -3.28980634 |
| C | -4.79586415 | 1.03604105  | -3.48530846 |
| C | -4.57780599 | -0.30668534 | -3.15446028 |
| C | -3.34359848 | -0.74949148 | -2.62761405 |
| C | 4.95009784  | 1.60465344  | -1.58122494 |
| C | 3.87204732  | 0.64352321  | -2.13616623 |
| C | 3.87731830  | 0.72895566  | -3.68986367 |
| C | -4.20425117 | -2.86321046 | -1.47465274 |
| C | -3.15099441 | -2.25818339 | -2.43667777 |
| C | -3.17773853 | -2.99169088 | -3.80610738 |
| H | 0.70766507  | 2.28707749  | 3.23927997  |
| H | -1.53819329 | 1.46385840  | 3.56820636  |
| H | 1.66530722  | -1.49979674 | -3.57620308 |
| H | -0.61302816 | -0.63990526 | -3.96957867 |
| H | 5.35149205  | 1.92450127  | 3.04105766  |
| H | 5.72132598  | 4.00130420  | 1.73398831  |
| H | 3.93965444  | 4.84831908  | 0.22788317  |
| H | 2.24223811  | -0.15595156 | 2.97861087  |
| H | -1.23048995 | -1.73251307 | 3.06616662  |
| H | 5.29736357  | -0.33806923 | 3.16443343  |
| H | 4.27419986  | -1.03767318 | 1.87993460  |

|   |             |             |             |
|---|-------------|-------------|-------------|
| H | 4.11452095  | -1.60736639 | 3.54597875  |
| H | 4.13864370  | 1.19794059  | 4.99835533  |
| H | 3.02241137  | -0.14348016 | 5.32288578  |
| H | 2.38844147  | 1.46647239  | 4.92268372  |
| H | -3.29468342 | -3.83686209 | 3.90881090  |
| H | -1.54255479 | -4.02796032 | 3.72212752  |
| H | -2.54977587 | -3.71678528 | 2.29436876  |
| H | -1.80719783 | -0.55356758 | 5.21097299  |
| H | -1.22740902 | -2.20754680 | 5.49553833  |
| H | -2.96437941 | -1.83879658 | 5.60506368  |
| H | -4.84626791 | -2.29843488 | 3.81990011  |
| H | -6.72497906 | -0.92153419 | 2.96236718  |
| H | -6.25754812 | 1.09732198  | 1.60256547  |
| H | 0.69595519  | 3.07781849  | -0.41134232 |
| H | -2.94411841 | 2.02949375  | 0.26298562  |
| H | 2.67105965  | 5.20118890  | -1.45178295 |
| H | 1.12513889  | 4.75445448  | -2.17509389 |
| H | 2.45586485  | 3.57979828  | -2.14126125 |
| H | 1.44710273  | 5.79789237  | 0.81202983  |
| H | 0.32417673  | 4.62870581  | 1.52803110  |
| H | -0.08484488 | 5.42166778  | -0.00756020 |
| H | -5.27716740 | 1.71801807  | -0.74135920 |
| H | -4.69921127 | 3.38993754  | -0.72228547 |
| H | -5.89500682 | 2.86920821  | 0.46934601  |
| H | -4.47776729 | 3.49211491  | 2.50081922  |
| H | -3.43804846 | 4.28071837  | 1.29492642  |
| H | -2.73359156 | 3.18527288  | 2.49891610  |
| H | 4.70765726  | -4.53869251 | -0.69324186 |
| H | 6.63055135  | -3.01637386 | -1.09726254 |
| H | 6.21858892  | -0.66254707 | -1.75447559 |
| H | 1.11412205  | -3.55409255 | -0.98457339 |
| H | -0.62444717 | 2.23157164  | -1.99398176 |
| H | 3.00760648  | -5.31344516 | 0.67118695  |
| H | 1.23465059  | -5.40620733 | 0.62231064  |
| H | 2.02725528  | -3.95981841 | 1.29221400  |
| H | 2.07124459  | -4.67797274 | -3.00516816 |
| H | 1.28320611  | -5.83400332 | -1.90691930 |
| H | 3.05444357  | -5.72310222 | -1.96178454 |
| H | -2.63290931 | 4.44891284  | -2.74736481 |
| H | -1.03532326 | 4.68508433  | -2.04048132 |
| H | -2.30807354 | 3.88177970  | -1.09819624 |
| H | -0.35953224 | 1.87422249  | -4.45194670 |
| H | 0.06546950  | 3.54198483  | -4.01592390 |
| H | -1.50136754 | 3.19126021  | -4.78012733 |
| H | -3.92692184 | 3.00192856  | -3.57831038 |
| H | -5.74750957 | 1.35103525  | -3.90682755 |
| H | -5.36536956 | -1.03456003 | -3.33291970 |
| H | 2.89250294  | 0.99094722  | -1.78185482 |
| H | -2.16966249 | -2.43779122 | -1.99939750 |
| H | 5.93446016  | 1.40202656  | -2.02329143 |
| H | 5.03975861  | 1.52635632  | -0.49369174 |
| H | 4.69384240  | 2.64210273  | -1.82837576 |

|    |             |             |             |
|----|-------------|-------------|-------------|
| H  | 3.76419217  | 1.77266029  | -4.01552082 |
| H  | 3.06736341  | 0.14547916  | -4.14029989 |
| H  | 4.82764201  | 0.35057186  | -4.08971770 |
| H  | -4.16256497 | -2.37880216 | -0.49345954 |
| H  | -4.00792394 | -3.93372136 | -1.32996532 |
| H  | -5.22341566 | -2.75897205 | -1.87137301 |
| H  | -2.40897056 | -2.60087541 | -4.48581658 |
| H  | -4.15061409 | -2.88380848 | -4.30376410 |
| H  | -2.98983644 | -4.06382433 | -3.66117105 |
| O  | 0.49425365  | -1.29912304 | 2.14470306  |
| O  | 1.67231224  | -1.47372002 | 1.18131044  |
| O  | -0.69831743 | -2.76839549 | -0.24789783 |
| Zr | 0.06704800  | -0.72274221 | 0.19535682  |

**Oxo Complex with adsorbed ozone group (conformation 1 lower energy)**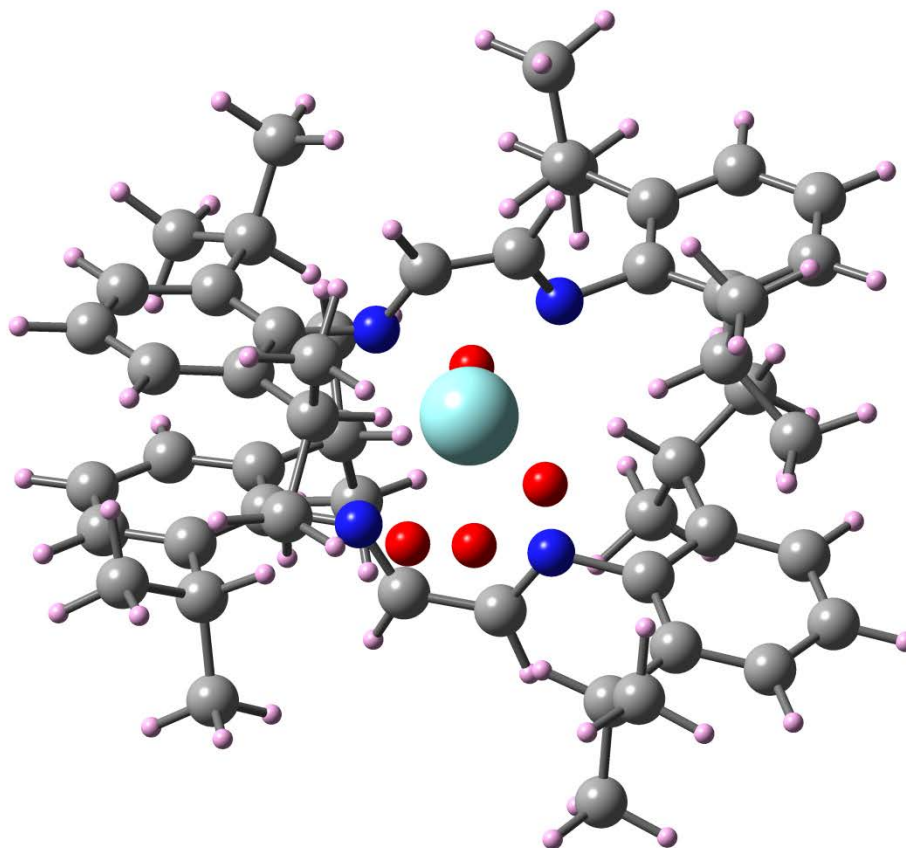

Fig. S34: NCCN Oxo Complex with adsorbed ozone group (conformation 1 lower energy)

| SCF          | E <sub>ZP</sub> | H            | G            |
|--------------|-----------------|--------------|--------------|
| -2591.025929 | -2589.880099    | -2589.810367 | -2589.986059 |

|   |             |             |             |
|---|-------------|-------------|-------------|
| O | 1.20992635  | -0.42361870 | 2.22465534  |
| O | -0.80145383 | -1.42580029 | 1.69295521  |
| O | 0.13571525  | 0.49028624  | -1.70935150 |
| N | 1.29968469  | -2.00188458 | -0.39124021 |
| N | -1.51801915 | -1.69717089 | -0.95641003 |
| N | -1.26365026 | 1.66225786  | 1.15398508  |
| N | 1.42102287  | 1.95744219  | 0.54165613  |
| C | 0.55394530  | -2.96279814 | -0.84923506 |
| C | -0.85478841 | -2.78063406 | -1.21875709 |
| C | -0.53930929 | 2.68178836  | 1.69616937  |
| C | 0.81925690  | 2.84520370  | 1.37024935  |
| C | 2.71759721  | -2.32129314 | -0.19202436 |
| C | 3.63739082  | -1.83925819 | -1.16682517 |
| C | 4.99645077  | -2.17429803 | -1.00338169 |
| C | 5.42698463  | -2.96803410 | 0.07146592  |
| C | 4.49675668  | -3.44900298 | 1.00176566  |

|   |             |             |             |
|---|-------------|-------------|-------------|
| C | 3.12208063  | -3.14410354 | 0.89453630  |
| C | 4.21288094  | -0.09960123 | -2.97435863 |
| C | 3.16359863  | -1.08736518 | -2.41689097 |
| C | 2.76527236  | -2.10153192 | -3.52830730 |
| C | -1.92998918 | 0.33905153  | -4.61822644 |
| C | -1.77754952 | -0.98518568 | -3.83003565 |
| C | -1.54730152 | -2.17038190 | -4.80758151 |
| C | -2.85667704 | -1.60784408 | -1.54176669 |
| C | -2.98058427 | -1.26559785 | -2.91817486 |
| C | -4.28417365 | -1.22619359 | -3.45941113 |
| C | -5.41132564 | -1.51280144 | -2.67694162 |
| C | -5.25592028 | -1.86099004 | -1.32582871 |
| C | -3.98025126 | -1.92417946 | -0.72961231 |
| C | 2.57925582  | -3.37808076 | 3.37980956  |
| C | 2.15456187  | -3.72978276 | 1.93088307  |
| C | 2.02777928  | -5.26916547 | 1.76300910  |
| C | -4.97217023 | -2.01563198 | 1.64248240  |
| C | -3.81154037 | -2.42673001 | 0.70816065  |
| C | -3.65426716 | -3.97452254 | 0.72164044  |
| C | -2.68457764 | 1.68030668  | 1.46669025  |
| C | -3.13388683 | 1.37212948  | 2.78414357  |
| C | -4.51359697 | 1.48274507  | 3.06290347  |
| C | -5.42716492 | 1.87957791  | 2.07772371  |
| C | -4.96875919 | 2.18427660  | 0.78600312  |
| C | -3.59988622 | 2.10580240  | 0.45734337  |
| C | -2.57791166 | -0.41823167 | 4.52065319  |
| C | -2.18888716 | 0.95645534  | 3.91890384  |
| C | -2.14001197 | 2.03763025  | 5.03286274  |
| C | 1.59876127  | 3.06962740  | -3.50101171 |
| C | 1.52803832  | 3.44079811  | -2.00008102 |
| C | 1.26032754  | 4.96048072  | -1.82021406 |
| C | 2.72542690  | 2.33707538  | 0.01693214  |
| C | 2.78720671  | 3.03585292  | -1.22520265 |
| C | 4.05181390  | 3.43943530  | -1.70211508 |
| C | 5.22397261  | 3.17318134  | -0.97838668 |
| C | 5.14337339  | 2.50617424  | 0.25257863  |
| C | 3.90279160  | 2.08375093  | 0.77846959  |
| C | -4.14772260 | 2.39235982  | -2.04543937 |
| C | -3.10669281 | 2.57494686  | -0.91732018 |
| C | -2.67551645 | 4.06817411  | -0.84826165 |
| C | 4.87538352  | 0.29526015  | 2.33825252  |
| C | 3.85813512  | 1.45024753  | 2.17322915  |
| C | 4.09083838  | 2.52998244  | 3.26641583  |
| H | 5.72213769  | -1.81634352 | -1.72625638 |
| H | 6.48082424  | -3.21310874 | 0.17861013  |
| H | 4.83785177  | -4.06777180 | 1.82728869  |
| H | 2.26468745  | -0.50963411 | -2.16847046 |
| H | -0.88554826 | -0.85151696 | -3.21180100 |
| H | 5.07613095  | -0.62201109 | -3.40939342 |
| H | 4.57360563  | 0.58669170  | -2.20192678 |
| H | 3.76082370  | 0.50315265  | -3.77128398 |
| H | 3.62819821  | -2.71398939 | -3.82369987 |

|   |             |             |             |
|---|-------------|-------------|-------------|
| H | 2.40613819  | -1.56296063 | -4.41469300 |
| H | 1.96627969  | -2.78091602 | -3.20485291 |
| H | -2.79096262 | 0.32486083  | -5.30023578 |
| H | -1.02875252 | 0.51463202  | -5.21981027 |
| H | -2.04014779 | 1.18298224  | -3.93006937 |
| H | -1.37989764 | -3.11586199 | -4.27339363 |
| H | -0.66893142 | -1.97689927 | -5.43769010 |
| H | -2.41286908 | -2.31491138 | -5.46830935 |
| H | -4.41314730 | -0.96649608 | -4.50681813 |
| H | -6.40462626 | -1.47278964 | -3.11768377 |
| H | -6.13316347 | -2.09348204 | -0.73023766 |
| H | 1.16130901  | -3.29905600 | 1.77925497  |
| H | -2.88853334 | -2.00182267 | 1.11886096  |
| H | 3.53478912  | -3.84806365 | 3.64699743  |
| H | 1.82136535  | -3.73570765 | 4.08876969  |
| H | 2.67729726  | -2.29484736 | 3.50318882  |
| H | 2.99394937  | -5.76637347 | 1.91890276  |
| H | 1.67360543  | -5.54392921 | 0.75995450  |
| H | 1.31786037  | -5.67269608 | 2.49687305  |
| H | -5.14628070 | -0.93552853 | 1.61371409  |
| H | -4.72837826 | -2.29106279 | 2.67638708  |
| H | -5.90851021 | -2.52777606 | 1.38139667  |
| H | -4.55203705 | -4.45964790 | 0.31498671  |
| H | -3.50736941 | -4.32947239 | 1.75002926  |
| H | -2.79426350 | -4.30717736 | 0.12687890  |
| H | -4.87271346 | 1.25434259  | 4.06369352  |
| H | -6.48610125 | 1.95783877  | 2.31321719  |
| H | -5.68231186 | 2.50026725  | 0.03159727  |
| H | -1.17810503 | 0.85535167  | 3.51564218  |
| H | 0.68006895  | 2.88977752  | -1.58831456 |
| H | -3.57821325 | -0.39366901 | 4.97325205  |
| H | -1.86188109 | -0.70238338 | 5.30333554  |
| H | -2.56330856 | -1.19545983 | 3.74964357  |
| H | -1.82682529 | 3.01253136  | 4.63725723  |
| H | -1.42849444 | 1.74358398  | 5.81601595  |
| H | -3.12348231 | 2.17011802  | 5.50317547  |
| H | 2.43064345  | 3.56891744  | -4.01651374 |
| H | 0.66887032  | 3.37083618  | -4.00207548 |
| H | 1.70477468  | 1.98607995  | -3.61915345 |
| H | 1.16194186  | 5.22518607  | -0.75929378 |
| H | 0.33095041  | 5.24791317  | -2.33049182 |
| H | 2.07876438  | 5.56061088  | -2.24112111 |
| H | 4.11729662  | 3.97733810  | -2.64460316 |
| H | 6.18895219  | 3.49532699  | -1.36338916 |
| H | 6.05129276  | 2.32138345  | 0.82130390  |
| H | -2.21653402 | 1.99250233  | -1.18562095 |
| H | 2.86244356  | 1.02979160  | 2.33384643  |
| H | -5.00701849 | 3.06452882  | -1.91767655 |
| H | -4.51802488 | 1.36262806  | -2.09527769 |
| H | -3.69029968 | 2.63601563  | -3.01272319 |
| H | -2.29764987 | 4.39961433  | -1.82495382 |
| H | -1.88339455 | 4.22771436  | -0.10869183 |



|    |             |             |             |
|----|-------------|-------------|-------------|
| H  | -3.53069307 | 4.70316888  | -0.57851343 |
| H  | 4.73300971  | -0.47372730 | 1.57175523  |
| H  | 4.74726007  | -0.17698029 | 3.32152089  |
| H  | 5.91287952  | 0.65108184  | 2.27489662  |
| H  | 3.34222013  | 3.33040586  | 3.20743142  |
| H  | 5.08260371  | 2.99066085  | 3.16144901  |
| H  | 4.02809399  | 2.07908277  | 4.26597712  |
| O  | 0.17105660  | -1.23357669 | 2.71292193  |
| H  | -1.30471516 | -3.59630362 | -1.79079387 |
| H  | 0.98076538  | -3.94879244 | -1.04760565 |
| H  | -1.02787655 | 3.40443589  | 2.34686419  |
| H  | 1.36148557  | 3.71705036  | 1.73172476  |
| Zr | 0.09770390  | 0.14158700  | 0.08012623  |

**Oxo Complex with adsorbed ozone group (conformation 2 higher energy)**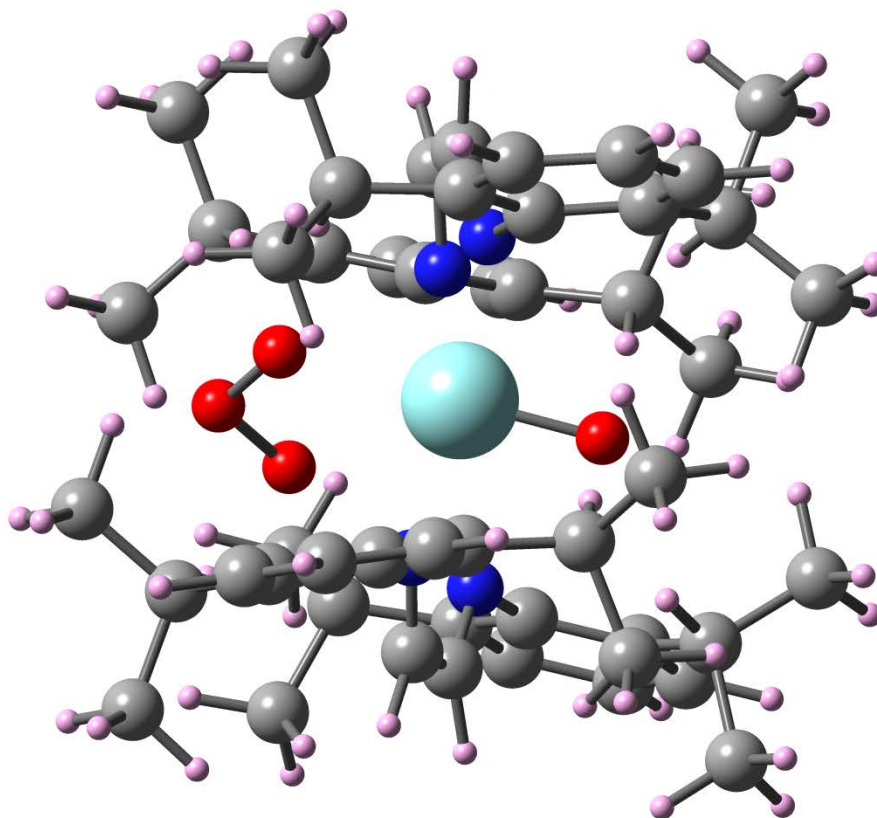

Fig. S35: NCCN Oxo Complex with adsorbed ozone group (conformation 2 higher energy)

| SCF          | E <sub>ZP</sub> | H            | G            |
|--------------|-----------------|--------------|--------------|
| -2591.025873 | -2589.880054    | -2589.810336 | -2589.985832 |

|   |             |             |             |
|---|-------------|-------------|-------------|
| N | 1.41889432  | -1.97135803 | -0.49230602 |
| N | -1.26652999 | -1.67899265 | -1.11247280 |
| N | -1.51937485 | 1.71108427  | 0.91864149  |
| N | 1.29911400  | 2.01294577  | 0.34628533  |
| C | 0.81265943  | -2.87533511 | -1.29954656 |
| C | -0.54472893 | -2.71338866 | -1.63012503 |
| C | -0.85989220 | 2.80447070  | 1.14927709  |
| C | 0.54859196  | 2.98285354  | 0.77668403  |
| C | 2.72174975  | -2.34617307 | 0.03981605  |
| C | 3.90015508  | -2.11139231 | -0.72567628 |
| C | 5.13846986  | -2.53227768 | -0.19320430 |
| C | 5.21562463  | -3.18019027 | 1.04817822  |
| C | 4.04230358  | -3.42706085 | 1.77690227  |
| C | 2.78014828  | -3.02314419 | 1.29391791  |
| C | 4.88973972  | -0.36191613 | -2.32039992 |
| C | 3.85738621  | -1.49949192 | -2.13007268 |

|   |             |             |             |
|---|-------------|-------------|-------------|
| C | 4.06798948  | -2.59982431 | -3.20717826 |
| C | -2.55651285 | 0.30882929  | -4.54114686 |
| C | -2.17066116 | -1.05115297 | -3.90446487 |
| C | -2.11563160 | -2.15897081 | -4.99160558 |
| C | -2.68529071 | -1.70032062 | -1.43407053 |
| C | -3.12324833 | -1.43724036 | -2.76524089 |
| C | -4.49978158 | -1.56249477 | -3.05318510 |
| C | -5.42141187 | -1.92938489 | -2.06405589 |
| C | -4.97498521 | -2.18412886 | -0.75742783 |
| C | -3.60971285 | -2.08847915 | -0.41813562 |
| C | 1.60460117  | -3.02670847 | 3.57616241  |
| C | 1.51812752  | -3.40112476 | 2.07701749  |
| C | 1.22058728  | -4.91628386 | 1.90620409  |
| C | -4.18809656 | -2.28915049 | 2.08609878  |
| C | -3.12957107 | -2.50035252 | 0.97947593  |
| C | -2.67876114 | -3.98917710 | 0.97393433  |
| C | -2.85626650 | 1.63658922  | 1.51108893  |
| C | -2.97357933 | 1.34340667  | 2.89932993  |
| C | -4.27402035 | 1.32813232  | 3.44922926  |
| C | -5.40478872 | 1.58911900  | 2.66315253  |
| C | -5.25644789 | 1.88238100  | 1.29822346  |
| C | -3.98411396 | 1.92002384  | 0.69271827  |
| C | -1.92411545 | -0.21286825 | 4.64329765  |
| C | -1.76673534 | 1.08471525  | 3.81258294  |
| C | -1.52084545 | 2.29822502  | 4.75056862  |
| C | 2.57283929  | 3.30774677  | -3.45153698 |
| C | 2.15318902  | 3.69705331  | -2.01061702 |
| C | 2.03636455  | 5.24085042  | -1.88025478 |
| C | 2.71630451  | 2.32922060  | 0.13967069  |
| C | 3.12020037  | 3.13087904  | -0.96294095 |
| C | 4.49520845  | 3.43148074  | -1.07816023 |
| C | 5.42629093  | 2.96752390  | -0.14021188 |
| C | 4.99640945  | 2.19523883  | 0.95043040  |
| C | 3.63733891  | 1.86459042  | 1.12196108  |
| C | -5.00159826 | 1.92703946  | -1.67032526 |
| C | -3.82260151 | 2.35548992  | -0.76747218 |
| C | -3.63531436 | 3.89736513  | -0.85561947 |
| C | 4.21145135  | 0.15639416  | 2.95977033  |
| C | 3.16446321  | 1.13741767  | 2.38656874  |
| C | 2.77204184  | 2.17362246  | 3.47954109  |
| H | 1.35065388  | -3.75788735 | -1.64082343 |
| H | -1.03540438 | -3.44876684 | -2.26470380 |
| H | -1.31361651 | 3.63446021  | 1.69711505  |
| H | 0.97070308  | 3.97555317  | 0.95009382  |
| H | 6.04731885  | -2.36125593 | -0.76467678 |
| H | 6.17883988  | -3.50198646 | 1.43787469  |
| H | 4.10497601  | -3.94893029 | 2.72852658  |
| H | 2.86677578  | -1.06717242 | -2.29177430 |
| H | -1.16179552 | -0.94042071 | -3.49884248 |
| H | 5.92263072  | -0.73151277 | -2.26105220 |
| H | 4.76500888  | 0.42032406  | -1.56423696 |
| H | 4.75955877  | 0.09737917  | -3.30948337 |

|   |             |             |             |
|---|-------------|-------------|-------------|
| H | 5.05398103  | -3.07247367 | -3.10061439 |
| H | 4.00525501  | -2.16435229 | -4.21359836 |
| H | 3.30872572  | -3.38862845 | -3.13112363 |
| H | -3.55301543 | 0.27190112  | -5.00130776 |
| H | -1.83436150 | 0.57609458  | -5.32413417 |
| H | -2.54939676 | 1.10401557  | -3.78834566 |
| H | -1.80453240 | -3.12384488 | -4.57054543 |
| H | -1.39980673 | -1.88421010 | -5.77783079 |
| H | -3.09638826 | -2.30314679 | -5.46396084 |
| H | -4.85019752 | -1.36999143 | -4.06454395 |
| H | -6.47745190 | -2.02156497 | -2.30732776 |
| H | -5.69494941 | -2.47456843 | 0.00103542  |
| H | 0.67934482  | -2.83502757 | 1.66677988  |
| H | -2.25094690 | -1.89587478 | 1.23796872  |
| H | 2.41006592  | -3.56447793 | 4.09510594  |
| H | 0.66059319  | -3.27997479 | 4.07719074  |
| H | 1.76509065  | -1.94958332 | 3.69291038  |
| H | 2.03292673  | -5.52900641 | 2.32086652  |
| H | 1.10576010  | -5.18357536 | 0.84763105  |
| H | 0.29170701  | -5.18499427 | 2.42746708  |
| H | -4.57178692 | -1.26323747 | 2.09328148  |
| H | -3.74030143 | -2.49116270 | 3.06738864  |
| H | -5.03716338 | -2.97671992 | 1.97222917  |
| H | -3.52131900 | -4.64460223 | 0.71350249  |
| H | -2.31485692 | -4.27871614 | 1.96903144  |
| H | -1.87134485 | -4.16632904 | 0.25551224  |
| H | -4.39757511 | 1.10679322  | 4.50599444  |
| H | -6.39562544 | 1.56927525  | 3.11070761  |
| H | -6.13677045 | 2.09111619  | 0.69851768  |
| H | -0.87955579 | 0.92484556  | 3.19346866  |
| H | 1.15759568  | 3.27632946  | -1.84693378 |
| H | -2.77895081 | -0.16945829 | 5.33177766  |
| H | -1.01925446 | -0.37797394 | 5.24236454  |
| H | -2.04850502 | -1.07739717 | 3.98340230  |
| H | -1.35353982 | 3.22585597  | 4.18585806  |
| H | -0.63743083 | 2.11962521  | 5.37803362  |
| H | -2.37898081 | 2.46852229  | 5.41497056  |
| H | 3.53091902  | 3.76504076  | -3.73111626 |
| H | 1.81604461  | 3.65300754  | -4.16777442 |
| H | 2.66387824  | 2.22129486  | -3.54898660 |
| H | 1.69348737  | 5.54298552  | -0.88116460 |
| H | 1.32214282  | 5.63007386  | -2.61765787 |
| H | 3.00388374  | 5.72807146  | -2.05778969 |
| H | 4.83588898  | 4.03357741  | -1.91609418 |
| H | 6.48025548  | 3.20917369  | -0.25370035 |
| H | 5.72264136  | 1.85061069  | 1.67922950  |
| H | -2.91344686 | 1.89229252  | -1.16792340 |
| H | 2.26300908  | 0.55853394  | 2.15119822  |
| H | -5.92381878 | 2.47151367  | -1.42466793 |
| H | -5.19834783 | 0.85354191  | -1.59044341 |
| H | -4.76202272 | 2.14934578  | -2.71788118 |
| H | -3.49874138 | 4.20017241  | -1.90187560 |

|    |             |             |             |
|----|-------------|-------------|-------------|
| H  | -2.75910583 | 4.24078495  | -0.29185087 |
| H  | -4.51714757 | 4.41863707  | -0.45881887 |
| H  | 4.56774758  | -0.54565862 | 2.19949157  |
| H  | 3.75852191  | -0.42909485 | 3.76899540  |
| H  | 5.07779838  | 0.68313457  | 3.38325421  |
| H  | 1.97553522  | 2.85034133  | 3.14438040  |
| H  | 3.63798671  | 2.78768578  | 3.76258999  |
| H  | 2.41159628  | 1.65311807  | 4.37611153  |
| O  | -0.79330060 | 1.39666591  | -1.72421276 |
| O  | 0.18225269  | 1.17938584  | -2.73397617 |
| O  | 1.21394335  | 0.37073666  | -2.22556246 |
| Zr | 0.10159461  | -0.13991286 | -0.07311959 |
| O  | 0.15222488  | -0.44759457 | 1.72384268  |

### 3.6 Structures with five oxygen atoms

#### Peroxo Complex with adsorbed ozone group

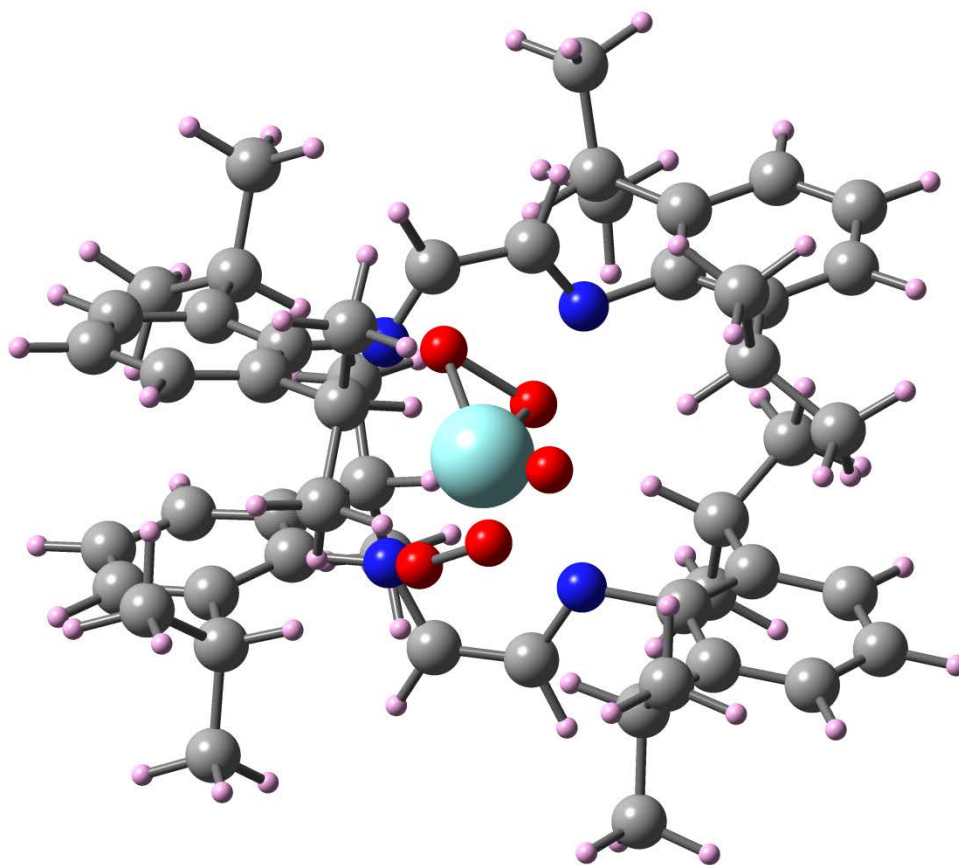

Fig. S36: NCCN Peroxo Complex with adsorbed ozone group

| SCF          | E <sub>ZP</sub> | H            | G            |
|--------------|-----------------|--------------|--------------|
| -2666.185522 | -2665.036398    | -2664.965883 | -2665.142607 |

|   |             |             |             |
|---|-------------|-------------|-------------|
| O | 0.84574202  | 0.61197605  | 1.99707017  |
| O | -0.98422814 | -0.74949004 | 2.14066918  |
| O | -0.50375309 | 0.62147906  | -1.85288512 |
| O | 0.73603100  | -0.29286202 | -1.91265513 |
| N | 1.31632002  | -1.99678716 | 0.42337305  |
| N | -1.35067018 | -1.95794913 | -0.41107601 |
| N | -1.38550514 | 1.92559317  | 0.52263806  |
| N | 1.41041307  | 2.02847915  | -0.24543800 |
| C | 0.60423196  | -3.14902224 | 0.32803505  |
| C | -0.73555614 | -3.13176722 | -0.09662499 |
| C | -0.70185508 | 3.02683925  | 0.42378605  |
| C | 0.69551103  | 3.08706823  | -0.03167098 |
| C | 2.72212113  | -2.15488619 | 0.78211208  |
| C | 3.70575021  | -2.14995820 | -0.25225100 |

|   |             |             |             |
|---|-------------|-------------|-------------|
| C | 5.05615930  | -2.34728622 | 0.10551603  |
| C | 5.43477132  | -2.56778324 | 1.43838313  |
| C | 4.45390426  | -2.60543224 | 2.43806721  |
| C | 3.08898816  | -2.40722621 | 2.13644919  |
| C | 4.33147526  | -1.24769213 | -2.58228818 |
| C | 3.32377318  | -2.05644919 | -1.73312411 |
| C | 3.15538915  | -3.48532129 | -2.32376416 |
| C | -1.69094820 | -1.13734206 | -4.50511432 |
| C | -1.54979320 | -2.16563814 | -3.35577723 |
| C | -1.27735319 | -3.58689225 | -3.92134828 |
| C | -2.67345228 | -2.09634012 | -1.01687406 |
| C | -2.77556229 | -2.18857513 | -2.43611517 |
| C | -4.05211439 | -2.39071213 | -3.00276021 |
| C | -5.19707248 | -2.50964713 | -2.20174915 |
| C | -5.07612347 | -2.44342913 | -0.80629204 |
| C | -3.82242137 | -2.24806112 | -0.18654899 |
| C | 2.37580911  | -1.55030713 | 4.43726536  |
| C | 2.06628908  | -2.52464921 | 3.27240927  |
| C | 1.98530306  | -3.98448932 | 3.79713431  |
| C | -4.77908044 | -1.38906905 | 2.03503818  |
| C | -3.73446436 | -2.29735113 | 1.34264512  |
| C | -3.88213039 | -3.76012624 | 1.84668016  |
| C | -2.79103425 | 2.09147320  | 0.92770909  |
| C | -3.11087227 | 2.32911122  | 2.29202020  |
| C | -4.47014337 | 2.53000725  | 2.61808322  |
| C | -5.46814944 | 2.50795726  | 1.63595015  |
| C | -5.12132842 | 2.29520224  | 0.29279004  |
| C | -3.78169732 | 2.09099421  | -0.09540099 |
| C | -2.38039422 | 1.42515014  | 4.56666837  |
| C | -2.06750118 | 2.41233522  | 3.41301928  |
| C | -1.95475316 | 3.86340333  | 3.95655232  |
| C | 1.83733311  | 1.69567612  | -4.38048931 |
| C | 1.68624010  | 2.63664819  | -3.15876922 |
| C | 1.49411810  | 4.10840831  | -3.61691126 |
| C | 2.74782318  | 2.23536815  | -0.80855004 |
| C | 2.87589919  | 2.52193817  | -2.19641615 |
| C | 4.17925029  | 2.73306917  | -2.69731419 |
| C | 5.30489736  | 2.66702116  | -1.86592212 |
| C | 5.14653737  | 2.39878814  | -0.49741902 |
| C | 3.87138826  | 2.18470113  | 0.06295203  |
| C | -4.50370838 | 1.30233816  | -2.43641417 |
| C | -3.41469429 | 1.98779920  | -1.58038610 |
| C | -3.11305125 | 3.40009730  | -2.15871914 |
| C | 4.86522833  | 1.24499605  | 2.24395019  |
| C | 3.70709325  | 2.02148112  | 1.57681114  |
| C | 3.54917325  | 3.41589523  | 2.24831219  |
| H | 5.81650835  | -2.34280224 | -0.67016603 |
| H | 6.48114238  | -2.72274327 | 1.69153515  |
| H | 4.74741028  | -2.79635726 | 3.46747628  |
| H | 2.35595311  | -1.55628814 | -1.81480212 |
| H | -0.67651413 | -1.86527513 | -2.77423219 |
| H | 5.29415331  | -1.76717418 | -2.68606319 |

|   |             |             |             |
|---|-------------|-------------|-------------|
| H | 4.51892729  | -0.25873806 | -2.15019314 |
| H | 3.92779723  | -1.10396712 | -3.59295525 |
| H | 4.09817321  | -4.04651334 | -2.26190715 |
| H | 2.85819813  | -3.42713328 | -3.37953224 |
| H | 2.38550308  | -4.05310033 | -1.78703912 |
| H | -2.53547726 | -1.36923807 | -5.16874337 |
| H | -0.77753812 | -1.13376307 | -5.11467837 |
| H | -1.82402320 | -0.12963898 | -4.09732529 |
| H | -1.12482719 | -4.31522831 | -3.11387622 |
| H | -0.37390212 | -3.57900226 | -4.54621633 |
| H | -2.11434926 | -3.94060627 | -4.53915633 |
| H | -4.14573140 | -2.46753713 | -4.08311229 |
| H | -6.17111553 | -2.66803713 | -2.65930318 |
| H | -5.96188255 | -2.56085712 | -0.18705599 |
| H | 1.08026500  | -2.26643417 | 2.88075524  |
| H | -2.74577828 | -1.94589311 | 1.64570514  |
| H | 3.32624218  | -1.79758916 | 4.92884740  |
| H | 1.58342405  | -1.60415713 | 5.19567842  |
| H | 2.43374612  | -0.51692006 | 4.07783033  |
| H | 2.94687813  | -4.31182935 | 4.21423934  |
| H | 1.71376803  | -4.68412637 | 2.99614525  |
| H | 1.22824700  | -4.06308132 | 4.58901937  |
| H | -4.71076242 | -0.35704397 | 1.67633115  |
| H | -4.60961642 | -1.38493605 | 3.12027526  |
| H | -5.80532250 | -1.74125407 | 1.86344116  |
| H | -4.86272447 | -4.17294626 | 1.57350514  |
| H | -3.78902038 | -3.79764724 | 2.94053124  |
| H | -3.11193634 | -4.41337829 | 1.41797213  |
| H | -4.74398539 | 2.70610327  | 3.65478230  |
| H | -6.50847354 | 2.66138628  | 1.91186016  |
| H | -5.89843547 | 2.29227825  | -0.46463602 |
| H | -1.08766511 | 2.13679818  | 3.01512025  |
| H | 0.77615703  | 2.31049118  | -2.64957718 |
| H | -3.31838029 | 1.68202817  | 5.07599441  |
| H | -1.57584216 | 1.45395614  | 5.31263440  |
| H | -2.46133624 | 0.39923006  | 4.19248934  |
| H | -1.68156514 | 4.57517138  | 3.16550626  |
| H | -1.18869410 | 3.91589132  | 4.74131138  |
| H | -2.90546923 | 4.20002936  | 4.38972936  |
| H | 2.73023917  | 1.92740713  | -4.97677336 |
| H | 0.96131104  | 1.79642713  | -5.03494337 |
| H | 1.88889810  | 0.65581304  | -4.04402329 |
| H | 1.34216210  | 4.78535336  | -2.76413519 |
| H | 0.61876204  | 4.18847732  | -4.27508931 |
| H | 2.36808218  | 4.47250233  | -4.17353830 |
| H | 4.30750630  | 2.94745119  | -3.75495126 |
| H | 6.29803647  | 2.82851316  | -2.27810915 |
| H | 6.02111140  | 2.36024912  | 0.14446903  |
| H | -2.50124523 | 1.39149614  | -1.67955811 |
| H | 2.78685918  | 1.46160209  | 1.76977615  |
| H | -5.39671247 | 1.93332821  | -2.54444717 |
| H | -4.80559542 | 0.34010909  | -2.01152313 |



|    |             |             |             |
|----|-------------|-------------|-------------|
| H  | -4.11238836 | 1.11450914  | -3.44360224 |
| H  | -2.83356424 | 3.31858029  | -3.21676722 |
| H  | -2.28781319 | 3.89783333  | -1.63365111 |
| H  | -3.99764232 | 4.04719136  | -2.08445514 |
| H  | 5.04039233  | 0.28287898  | 1.75190515  |
| H  | 4.61708331  | 1.04538004  | 3.29437227  |
| H  | 5.80324839  | 1.81694609  | 2.23427119  |
| H  | 2.68734719  | 3.96721428  | 1.84998816  |
| H  | 4.44496733  | 4.02982927  | 2.08375418  |
| H  | 3.40494324  | 3.30098822  | 3.33060528  |
| O  | -0.03542706 | -0.05532600 | 2.89819524  |
| H  | -1.27122620 | -4.07116029 | -0.21652600 |
| H  | 1.08022199  | -4.10113532 | 0.55613106  |
| H  | -1.17066010 | 3.98864733  | 0.64576907  |
| H  | 1.09259107  | 4.08815231  | -0.21835700 |
| Zr | -0.03037706 | -0.14745400 | -0.02845798 |

$\eta^2$ -ozone Complex with adsorbed O<sub>2</sub> molecule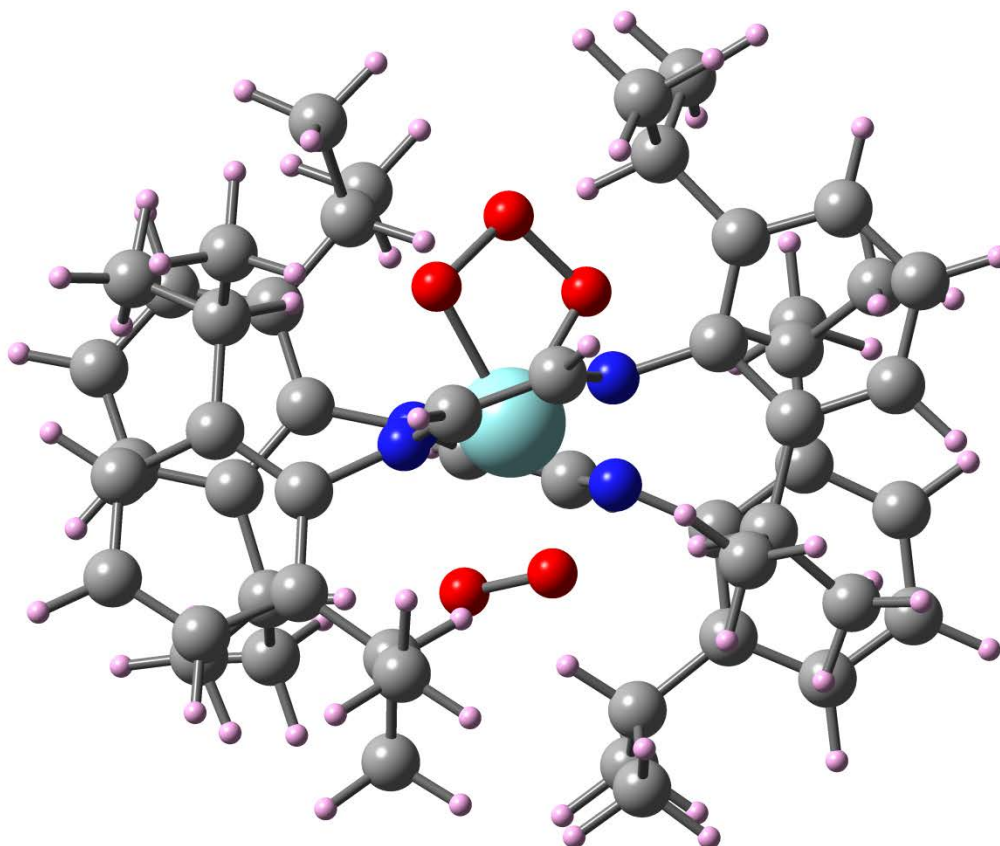Fig. S37: NCCN  $\eta^2$ -ozone Complex with adsorbed O<sub>2</sub> molecule

| SCF          | E <sub>ZP</sub> | H            | G            |
|--------------|-----------------|--------------|--------------|
| -2666.184038 | -2665.034724    | -2664.964258 | -2665.140264 |

|   |             |             |             |
|---|-------------|-------------|-------------|
| O | -0.87215607 | 0.67602805  | -1.96309015 |
| O | 1.00863508  | -0.68424805 | -2.00928115 |
| O | 0.51267204  | 0.42994803  | 1.86780514  |
| O | -0.69785205 | -0.24421002 | 1.97623315  |
| N | -1.41304611 | -1.95540315 | -0.48177604 |
| N | 1.21916209  | -2.03315915 | 0.37573203  |
| N | 1.49034411  | 1.91659415  | -0.47523804 |
| N | -1.27825910 | 2.05589116  | 0.31094902  |
| C | -0.78151406 | -3.14782224 | -0.32414202 |
| C | 0.55257504  | -3.18786024 | 0.11337501  |
| C | 0.83834407  | 3.03497123  | -0.38074803 |
| C | -0.55374904 | 3.10741124  | 0.08506601  |
| C | -2.82521622 | -2.04268316 | -0.84217207 |
| C | -3.80012229 | -2.09270316 | 0.19695402  |
| C | -5.15762440 | -2.23286117 | -0.16292701 |
| C | -5.54595442 | -2.34486518 | -1.50603812 |

|   |             |             |             |
|---|-------------|-------------|-------------|
| C | -4.57089935 | -2.32819018 | -2.51356819 |
| C | -3.20060624 | -2.18121717 | -2.20926517 |
| C | -4.27857233 | -1.15733509 | 2.54325020  |
| C | -3.41470526 | -2.10792616 | 1.68055413  |
| C | -3.49013927 | -3.55740927 | 2.23748417  |
| C | 1.47680211  | -1.44100511 | 4.49576234  |
| C | 1.38461711  | -2.44032319 | 3.31550625  |
| C | 1.16138209  | -3.88573030 | 3.83937529  |
| C | 2.53342119  | -2.20373017 | 0.99165708  |
| C | 2.61739220  | -2.38423418 | 2.40491018  |
| C | 3.88865330  | -2.59871120 | 2.98002423  |
| C | 5.04575638  | -2.65304320 | 2.19115616  |
| C | 4.94249238  | -2.51271419 | 0.79926606  |
| C | 3.69675128  | -2.29990718 | 0.17043001  |
| C | -2.48797419 | -1.25004709 | -4.48341734 |
| C | -2.17511517 | -2.25118117 | -3.34446425 |
| C | -2.07839216 | -3.69842328 | -3.90092230 |
| C | 4.77479836  | -1.52039911 | -2.03304416 |
| C | 3.61840828  | -2.29611818 | -1.35959410 |
| C | 3.58173727  | -3.75686929 | -1.89188315 |
| C | 2.90376222  | 2.03133116  | -0.86194306 |
| C | 3.25491725  | 2.22775417  | -2.22403217 |
| C | 4.62565436  | 2.38453618  | -2.52565319 |
| C | 5.60456144  | 2.35439418  | -1.52412912 |
| C | 5.22725440  | 2.17479716  | -0.18418101 |
| C | 3.87479029  | 2.01594916  | 0.17868601  |
| C | 2.55476419  | 1.31739810  | -4.50297834 |
| C | 2.22973317  | 2.31091918  | -3.35985726 |
| C | 2.12979916  | 3.76159729  | -3.90597030 |
| C | -1.60834512 | 1.79303414  | 4.47637334  |
| C | -1.48248612 | 2.70469120  | 3.22953425  |
| C | -1.27323310 | 4.18479832  | 3.65339728  |
| C | -2.60166920 | 2.29096517  | 0.90240807  |
| C | -2.69366420 | 2.57922719  | 2.29421217  |
| C | -3.98130830 | 2.80592721  | 2.82795622  |
| C | -5.12571939 | 2.76437121  | 2.02149716  |
| C | -5.00169038 | 2.51312819  | 0.64637505  |
| C | -3.74437829 | 2.28107618  | 0.05324300  |
| C | 4.48579534  | 1.16939309  | 2.53270819  |
| C | 3.47528926  | 1.94480415  | 1.65701013  |
| C | 3.27787725  | 3.37834826  | 2.22814517  |
| C | -4.82669037 | 1.44689911  | -2.12723216 |
| C | -3.61772527 | 2.14702316  | -1.46702211 |
| C | -3.41032926 | 3.54970227  | -2.10788716 |
| H | -5.91360243 | -2.27239418 | 0.61704605  |
| H | -6.59652753 | -2.45915619 | -1.76352113 |
| H | -4.87359737 | -2.43806019 | -3.55184727 |
| H | -2.37650218 | -1.78007314 | 1.77187013  |
| H | 0.50402604  | -2.16707617 | 2.72988921  |
| H | -5.32774739 | -1.47991611 | 2.58206920  |
| H | -4.25251233 | -0.13297001 | 2.15753316  |
| H | -3.90117030 | -1.14277509 | 3.57458127  |

|   |             |             |             |
|---|-------------|-------------|-------------|
| H | -4.51352434 | -3.95086730 | 2.17177216  |
| H | -3.18405824 | -3.57747828 | 3.29237225  |
| H | -2.83252721 | -4.23551232 | 1.67924713  |
| H | 2.32272518  | -1.66978113 | 5.15760639  |
| H | 0.55991604  | -1.48463812 | 5.09884139  |
| H | 1.59131912  | -0.41624703 | 4.12548532  |
| H | 1.04523908  | -4.59659935 | 3.01106123  |
| H | 0.25456202  | -3.93141630 | 4.45760434  |
| H | 2.00719815  | -4.22285432 | 4.45323434  |
| H | 3.96801230  | -2.73856921 | 4.05538831  |
| H | 6.01586546  | -2.82149522 | 2.65333920  |
| H | 5.83806444  | -2.58539120 | 0.18859401  |
| H | -1.19464809 | -1.98001115 | -2.94990323 |
| H | 2.68487620  | -1.81684114 | -1.66430813 |
| H | -3.44617527 | -1.46946311 | -4.97466738 |
| H | -1.70001713 | -1.29762910 | -5.24585940 |
| H | -2.51726819 | -0.22604902 | -4.09581831 |
| H | -3.03469123 | -4.02626431 | -4.33120733 |
| H | -1.80216714 | -4.41366634 | -3.11481124 |
| H | -1.31550810 | -3.74989229 | -4.68925936 |
| H | 4.86072237  | -0.50295304 | -1.63757812 |
| H | 4.58853935  | -1.44858411 | -3.11270424 |
| H | 5.74315846  | -2.02322815 | -1.90170015 |
| H | 4.49439934  | -4.30201833 | -1.61298513 |
| H | 3.50297027  | -3.75701229 | -2.98726823 |
| H | 2.72189221  | -4.30877533 | -1.49327911 |
| H | 4.92318838  | 2.53025419  | -3.56035327 |
| H | 6.65374148  | 2.47432319  | -1.78289913 |
| H | 5.98945248  | 2.16249017  | 0.58877604  |
| H | 1.24737909  | 2.02167916  | -2.98165923 |
| H | -0.58195604 | 2.37892718  | 2.70267321  |
| H | 3.51013427  | 1.55029112  | -4.99263738 |
| H | 1.76594714  | 1.35880210  | -5.26449840 |
| H | 2.59546120  | 0.29363602  | -4.11760331 |
| H | 1.84664514  | 4.47617234  | -3.12023624 |
| H | 1.37359011  | 3.81366929  | -4.70016836 |
| H | 3.08678123  | 4.09688231  | -4.32778133 |
| H | -2.46789619 | 2.06948716  | 5.10093939  |
| H | -0.70540005 | 1.88010614  | 5.09506239  |
| H | -1.71503013 | 0.74575606  | 4.17594332  |
| H | -1.13584709 | 4.84229237  | 2.78384721  |
| H | -0.38564203 | 4.27548533  | 4.29350733  |
| H | -2.13604416 | 4.56193735  | 4.21748432  |
| H | -4.08247231 | 3.01940223  | 3.88861230  |
| H | -6.10654649 | 2.93759722  | 2.45752819  |
| H | -5.89007246 | 2.50342719  | 0.02313400  |
| H | 2.51581819  | 1.42403511  | 1.73373213  |
| H | -2.72753921 | 1.55288812  | -1.69782313 |
| H | 5.43674541  | 1.70943413  | 2.63551320  |
| H | 4.69345536  | 0.17627901  | 2.12308116  |
| H | 4.07445831  | 1.03827908  | 3.54164027  |
| H | 2.96864922  | 3.32834326  | 3.28047625  |

|    |             |             |             |
|----|-------------|-------------|-------------|
| H  | 2.51342819  | 3.94249330  | 1.67775513  |
| H  | 4.21527932  | 3.94764830  | 2.17287617  |
| H  | -5.04544139 | 0.48598604  | -1.65083913 |
| H  | -4.60431435 | 1.25321510  | -3.18395124 |
| H  | -5.73245945 | 2.06838116  | -2.09298516 |
| H  | -2.51175719 | 4.05005631  | -1.72422413 |
| H  | -4.27117333 | 4.20255832  | -1.90809315 |
| H  | -3.29744925 | 3.45103926  | -3.19513825 |
| O  | 0.06563600  | 0.02612200  | -2.95628723 |
| H  | 1.03631408  | -4.14716032 | 0.28515402  |
| H  | -1.31752810 | -4.07387131 | -0.52104604 |
| H  | 1.32137510  | 3.98857730  | -0.60694505 |
| H  | -0.94407607 | 4.11009031  | 0.27541702  |
| Zr | -0.01175900 | -0.16996601 | -0.24313102 |

### 3.7 Structures with six oxygen atoms

#### $\eta^2$ -ozone Complex with adsorbed ozone group

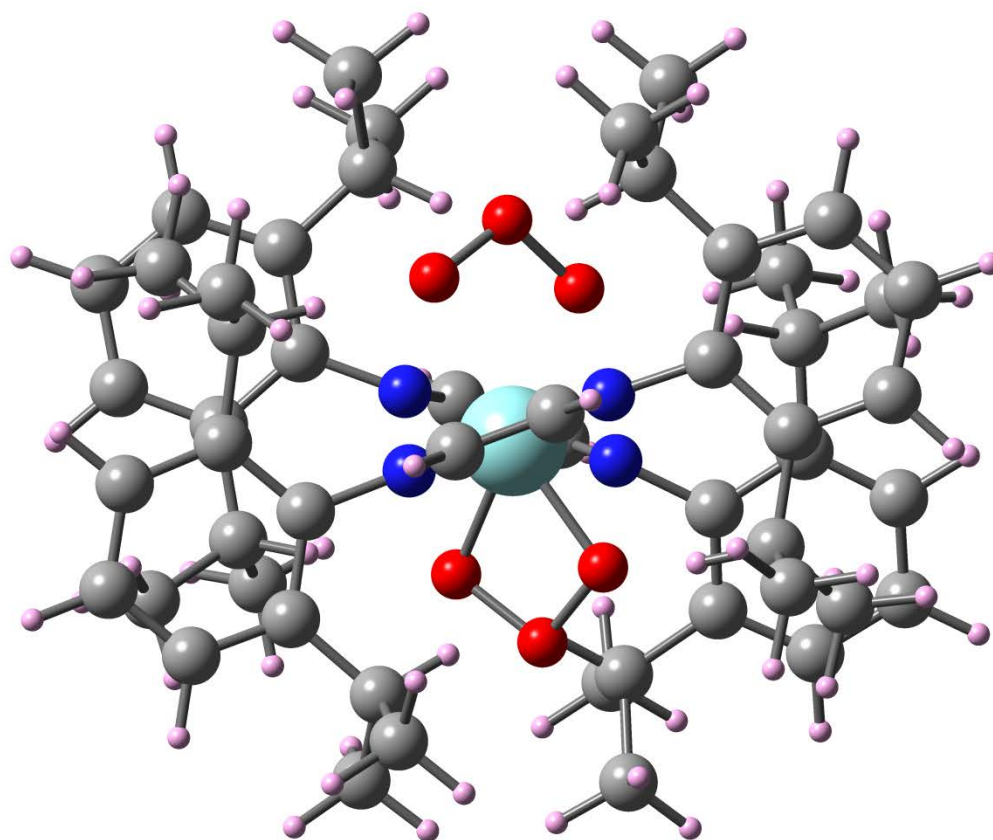

Fig. S38: NCCN  $\eta^2$ -ozone Complex with adsorbed ozone group

| SCF          | $E_{ZP}$     | H            | G            |
|--------------|--------------|--------------|--------------|
| -2741.319046 | -2740.166505 | -2740.095068 | -2740.274636 |

|    |             |             |             |
|----|-------------|-------------|-------------|
| Zr | 0.04618909  | 0.09431848  | 0.16929740  |
| O  | 0.87957945  | 0.45677625  | -1.97008282 |
| O  | -0.99014092 | 1.63104788  | -1.38851762 |
| O  | -0.70086607 | -1.57870579 | 1.20505098  |
| O  | 1.26009317  | -0.46813704 | 1.76032978  |
| N  | 1.34959379  | 1.99736648  | 0.61681710  |
| N  | -1.25909861 | 1.42776514  | 1.46816939  |
| N  | -1.42864896 | -1.31670317 | -1.44680718 |
| N  | 1.34232483  | -1.97933403 | -0.82094369 |
| C  | 0.68483938  | 2.84824741  | 1.44047337  |
| C  | -0.62495672 | 2.56788209  | 1.85988776  |
| C  | -0.78669493 | -2.33002141 | -1.94990558 |
| C  | 0.58374477  | -2.70367822 | -1.58500281 |
| C  | 2.72319358  | 2.40580093  | 0.30471833  |

|   |             |             |             |
|---|-------------|-------------|-------------|
| C | 3.78600205  | 2.05720075  | 1.19162160  |
| C | 5.09056072  | 2.50315900  | 0.88396110  |
| C | 5.35016619  | 3.29327602  | -0.24345055 |
| C | 4.28753156  | 3.67673912  | -1.07256952 |
| C | 2.96461775  | 3.26061699  | -0.81182477 |
| C | 4.47083044  | 0.05134966  | 2.62951832  |
| C | 3.57139977  | 1.30595606  | 2.51009771  |
| C | 3.79883907  | 2.25913215  | 3.71558739  |
| C | -1.87316334 | -1.48055887 | 4.45380345  |
| C | -1.62151064 | -0.00922048 | 4.04382634  |
| C | -1.31921778 | 0.86393961  | 5.29300547  |
| C | -2.60829817 | 1.27838974  | 2.01729176  |
| C | -2.78823837 | 0.58689836  | 3.25052748  |
| C | -4.08523872 | 0.53285165  | 3.80422261  |
| C | -5.17565267 | 1.14976278  | 3.17499341  |
| C | -4.97670968 | 1.85244770  | 1.97831961  |
| C | -3.69936080 | 1.94389515  | 1.38370842  |
| C | 2.08089168  | 3.61893838  | -3.19114409 |
| C | 1.83895494  | 3.83616165  | -1.67663867 |
| C | 1.64129067  | 5.34711713  | -1.37118271 |
| C | -4.53599971 | 2.48994610  | -0.98028989 |
| C | -3.52654996 | 2.82819161  | 0.14320441  |
| C | -3.63579128 | 4.32985794  | 0.52844839  |
| C | -2.81368422 | -1.15548828 | -1.92274427 |
| C | -3.06058188 | -0.65600878 | -3.23257359 |
| C | -4.40604997 | -0.54467055 | -3.64782890 |
| C | -5.46372710 | -0.93064751 | -2.81598142 |
| C | -5.19124169 | -1.46350290 | -1.54717040 |
| C | -3.87012778 | -1.59960103 | -1.07542317 |
| C | -2.14694854 | 1.16021676  | -4.78482530 |
| C | -1.96244478 | -0.27765516 | -4.23590372 |
| C | -1.91164994 | -1.29871448 | -5.40637556 |
| C | 1.53831319  | -4.61422420 | 2.51356766  |
| C | 1.44690273  | -4.39781721 | 0.98162313  |
| C | 1.23536545  | -5.76334488 | 0.26844524  |
| C | 2.63605340  | -2.54850571 | -0.44709789 |
| C | 2.68398347  | -3.67969489 | 0.42019081  |
| C | 3.95937860  | -4.18067043 | 0.76309830  |
| C | 5.13433417  | -3.60575508 | 0.26401106  |
| C | 5.05749387  | -2.51494147 | -0.61571958 |
| C | 3.81672239  | -1.96817588 | -0.99470403 |
| C | -4.72085819 | -2.14261162 | 1.29409357  |
| C | -3.59917392 | -2.32322859 | 0.24726879  |
| C | -3.37630974 | -3.84096786 | -0.01390709 |
| C | 4.99661896  | 0.03071608  | -2.11572504 |
| C | 3.74525158  | -0.87169390 | -2.06068078 |
| C | 3.49680747  | -1.50328038 | -3.46059222 |
| H | 1.17329537  | 3.75664494  | 1.78767313  |
| H | -1.13424068 | 3.26122077  | 2.52549610  |
| H | -1.27924824 | -2.99182173 | -2.66638468 |
| H | 0.93067577  | -3.66125589 | -1.97956253 |
| H | 5.90728035  | 2.23928748  | 1.55114033  |

|   |             |             |             |
|---|-------------|-------------|-------------|
| H | 6.36300563  | 3.62503438  | -0.46017017 |
| H | 4.48060906  | 4.32536575  | -1.92347046 |
| H | 2.54108628  | 0.95226504  | 2.55280853  |
| H | -0.72925042 | -0.00447678 | 3.41710204  |
| H | 5.53928562  | 0.30886171  | 2.64418289  |
| H | 4.29167949  | -0.63856673 | 1.79808036  |
| H | 4.24293044  | -0.48253371 | 3.56162219  |
| H | 4.83222300  | 2.63098160  | 3.74735685  |
| H | 3.60098151  | 1.72937705  | 4.65721567  |
| H | 3.13173188  | 3.13036641  | 3.66960638  |
| H | -2.73849023 | -1.58142324 | 5.12348541  |
| H | -0.99414951 | -1.87485183 | 4.97944471  |
| H | -2.03879571 | -2.10140439 | 3.56665850  |
| H | -1.08537599 | 1.89878694  | 5.01032470  |
| H | -0.45666432 | 0.45741082  | 5.83765168  |
| H | -2.17563003 | 0.88847574  | 5.98065676  |
| H | -4.23675455 | 0.01318257  | 4.74672585  |
| H | -6.16622657 | 1.09808594  | 3.62118633  |
| H | -5.81800000 | 2.35356206  | 1.50610389  |
| H | 0.90783422  | 3.33456135  | -1.41098652 |
| H | -2.52682788 | 2.66792587  | -0.26454113 |
| H | 2.95867197  | 4.17592539  | -3.54519056 |
| H | 1.21264906  | 3.96784913  | -3.76570880 |
| H | 2.23489889  | 2.55769142  | -3.41674524 |
| H | 2.54431014  | 5.92390027  | -1.61119017 |
| H | 1.41079353  | 5.51176465  | -0.31065830 |
| H | 0.81123396  | 5.75088921  | -1.96668160 |
| H | -4.47085364 | 1.43649949  | -1.27030260 |
| H | -4.32441868 | 3.10078914  | -1.86819326 |
| H | -5.57134038 | 2.69589455  | -0.67635229 |
| H | -4.62735486 | 4.56272950  | 0.93960745  |
| H | -3.47783903 | 4.96145691  | -0.35626799 |
| H | -2.88726746 | 4.60800671  | 1.28121954  |
| H | -4.62126898 | -0.15315144 | -4.63835772 |
| H | -6.49128994 | -0.83044041 | -3.15663145 |
| H | -6.01300700 | -1.78520797 | -0.91611881 |
| H | -0.99036982 | -0.30645035 | -3.73825530 |
| H | 0.56221653  | -3.77831686 | 0.81283367  |
| H | -3.05835462 | 1.24823732  | -5.39018909 |
| H | -1.29573246 | 1.42994986  | -5.42323033 |
| H | -2.20607974 | 1.88767086  | -3.96861485 |
| H | -1.73119978 | -2.32152047 | -5.04843191 |
| H | -1.10607319 | -1.03490684 | -6.10419742 |
| H | -2.85499451 | -1.30800491 | -5.96736975 |
| H | 2.34349389  | -5.31021723 | 2.78347584  |
| H | 0.59593222  | -5.03958404 | 2.88353832  |
| H | 1.70527453  | -3.66343859 | 3.02765650  |
| H | 1.11665405  | -5.65183310 | -0.81817858 |
| H | 0.33704432  | -6.25929176 | 0.65970247  |
| H | 2.09001439  | -6.43192234 | 0.43665879  |
| H | 4.02674193  | -5.03214401 | 1.43426159  |
| H | 6.10295364  | -4.00920451 | 0.54913651  |



|   |             |             |             |
|---|-------------|-------------|-------------|
| H | 5.97070029  | -2.08728160 | -1.01600010 |
| H | -2.67454099 | -1.93477709 | 0.68613814  |
| H | 2.88704555  | -0.22828703 | -1.84173453 |
| H | -5.63778048 | -2.67797321 | 1.01049110  |
| H | -4.96643103 | -1.08726934 | 1.44669733  |
| H | -4.38983820 | -2.55042063 | 2.25695975  |
| H | -3.16501951 | -4.35461480 | 0.93253969  |
| H | -2.53100509 | -4.02706528 | -0.68840893 |
| H | -4.27148034 | -4.29484231 | -0.46094560 |
| H | 5.23942037  | 0.44534215  | -1.13212919 |
| H | 4.81145609  | 0.87270267  | -2.79369043 |
| H | 5.87477802  | -0.50878347 | -2.49654558 |
| H | 2.57204467  | -2.09254051 | -3.48925437 |
| H | 4.32937591  | -2.16367521 | -3.73934672 |
| H | 3.41367447  | -0.71445901 | -4.21921563 |
| O | -0.05905924 | 1.43165955  | -2.41454320 |
| O | 0.45201758  | -1.66704126 | 2.18523095  |

## 4. NCCN Singlet Transition States

## Spiro Bisperoxo Complex to Oxo Peroxo Complex

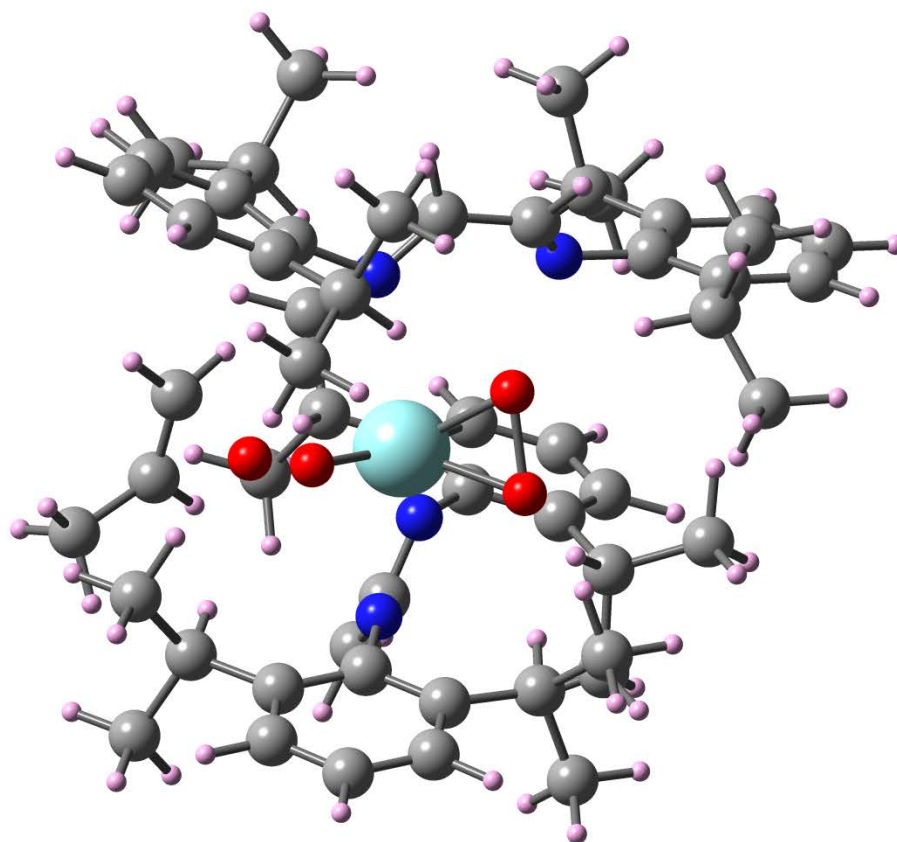

Fig. S39: NCCN Spiro Bisperoxo Complex to Oxo Peroxo Complex

| SCF          | $E_{ZP}$     | H            | G            | imag freq<br>( $\text{cm}^{-1}$ ) |
|--------------|--------------|--------------|--------------|-----------------------------------|
| -2708.874771 | -2707.647817 | -2707.573331 | -2707.758703 | -477                              |

|    |             |             |             |
|----|-------------|-------------|-------------|
| Zr | 0.86751388  | -0.05151127 | -0.29104538 |
| O  | 2.55778663  | 0.67904627  | -0.77096074 |
| N  | -2.95035238 | 0.47938398  | -1.11796693 |
| N  | -0.27303250 | 2.11710207  | -1.20162699 |
| N  | 2.49114772  | -1.67803467 | 0.72678059  |
| N  | 0.00989836  | -1.02951770 | 1.91921352  |
| C  | -2.39581301 | 1.11130585  | -2.10015345 |
| C  | -1.32207808 | 2.11292555  | -1.97202423 |
| C  | 2.32749540  | -1.79808661 | 2.00692989  |
| C  | 0.98969931  | -1.57169178 | 2.58714379  |
| C  | -4.04887062 | -0.41369901 | -1.34261091 |
| C  | -4.04158521 | -1.42771249 | -2.35520448 |
| C  | -5.17748531 | -2.26291357 | -2.44711926 |
| C  | -6.27992935 | -2.11245347 | -1.59556097 |

|   |             |             |             |
|---|-------------|-------------|-------------|
| C | -6.27013666 | -1.11114275 | -0.60891562 |
| C | -5.16541755 | -0.25458762 | -0.46045088 |
| C | -2.43170793 | -3.14605619 | -3.39269024 |
| C | -2.88288817 | -1.66469535 | -3.33857503 |
| C | -3.27506168 | -1.18635854 | -4.76516542 |
| C | 3.27541898  | 1.91916817  | -3.58273724 |
| C | 1.78405794  | 2.26240599  | -3.35778185 |
| C | 1.11204970  | 2.65847997  | -4.70370263 |
| C | 0.55111906  | 3.33562481  | -1.33634819 |
| C | 1.57343849  | 3.37608421  | -2.32342742 |
| C | 2.35192233  | 4.55034959  | -2.40797258 |
| C | 2.11797358  | 5.64825878  | -1.56898464 |
| C | 1.06421609  | 5.60528535  | -0.64361636 |
| C | 0.25204071  | 4.45914694  | -0.51546960 |
| C | -6.10194259 | 0.63736687  | 1.77054585  |
| C | -5.18095733 | 0.89058299  | 0.55630647  |
| C | -5.58438481 | 2.22415227  | -0.13550799 |
| C | -0.75834100 | 5.35288183  | 1.69024924  |
| C | -0.96712287 | 4.49133892  | 0.41978489  |
| C | -2.22217289 | 5.02085015  | -0.33249871 |
| C | 3.71950699  | -2.11763029 | 0.08225557  |
| C | 4.95333825  | -1.44260518 | 0.30054024  |
| C | 6.09333664  | -1.92829292 | -0.37503622 |
| C | 6.02779269  | -3.03778051 | -1.22699464 |
| C | 4.80319849  | -3.69366262 | -1.41587126 |
| C | 3.62832926  | -3.25203598 | -0.77602598 |
| C | 5.67175075  | 0.99489931  | 0.40685476  |
| C | 5.11706235  | -0.21475428 | 1.20212060  |
| C | 6.02668179  | -0.55270242 | 2.41494466  |
| C | -2.48196513 | -4.16731769 | 0.33228657  |
| C | -1.41844528 | -3.48887408 | 1.22886410  |
| C | -0.66942023 | -4.57552260 | 2.05070506  |
| C | -1.33491611 | -1.22285989 | 2.49149332  |
| C | -2.01769783 | -2.42941521 | 2.16244483  |
| C | -3.26867591 | -2.66148795 | 2.77016501  |
| C | -3.82734174 | -1.74369223 | 3.67093902  |
| C | -3.14406037 | -0.55743242 | 3.96562709  |
| C | -1.89308344 | -0.27011309 | 3.38054666  |
| C | 2.00439162  | -4.33651051 | -2.43017943 |
| C | 2.34302818  | -4.06761326 | -0.94472337 |
| C | 2.45040736  | -5.39879192 | -0.14989013 |
| C | -2.07027234 | 2.26900331  | 3.60121987  |
| C | -1.16998759 | 1.01960396  | 3.76483751  |
| C | -0.62241988 | 0.93575018  | 5.21571991  |
| H | -2.77823635 | 1.04427092  | -3.12556165 |
| H | -1.45298738 | 2.94634450  | -2.67349954 |
| H | 3.10321101  | -2.19399301 | 2.66709225  |
| H | 0.81879086  | -2.00145204 | 3.57867875  |
| H | -5.19312744 | -3.04404023 | -3.20257694 |
| H | -7.14112839 | -2.76885275 | -1.69823370 |
| H | -7.12846772 | -0.99973568 | 0.04601320  |
| H | -1.99944423 | -1.10973790 | -3.01094740 |

|   |             |             |             |
|---|-------------|-------------|-------------|
| H | 1.30198591  | 1.34719228  | -3.00476001 |
| H | -3.22623902 | -3.81675911 | -3.74750597 |
| H | -2.09655167 | -3.48539196 | -2.40896618 |
| H | -1.58050932 | -3.23902411 | -4.07886778 |
| H | -4.10903001 | -1.77943817 | -5.16544627 |
| H | -2.42146787 | -1.29724927 | -5.44670146 |
| H | -3.58883359 | -0.13337964 | -4.77986556 |
| H | 3.83442607  | 2.75590808  | -4.02456519 |
| H | 3.35642984  | 1.06830100  | -4.27237840 |
| H | 3.73500972  | 1.63205389  | -2.63300203 |
| H | 0.03599243  | 2.84817858  | -4.58738105 |
| H | 1.23372533  | 1.84883869  | -5.43519101 |
| H | 1.56619950  | 3.56774946  | -5.12113284 |
| H | 3.14775220  | 4.60253544  | -3.14522362 |
| H | 2.73746710  | 6.53859013  | -1.64886361 |
| H | 0.86642696  | 6.47395182  | -0.02285072 |
| H | -4.15164303 | 1.00839135  | 0.91974464  |
| H | -1.18673947 | 3.46285785  | 0.73682425  |
| H | -7.16348872 | 0.64674539  | 1.48755150  |
| H | -5.95851524 | 1.43067093  | 2.51644509  |
| H | -5.87916749 | -0.32279615 | 2.24861338  |
| H | -6.60483534 | 2.15736778  | -0.53657748 |
| H | -4.90895142 | 2.46849382  | -0.96332906 |
| H | -5.55521492 | 3.05441027  | 0.58382510  |
| H | 0.15440134  | 5.08142729  | 2.23163765  |
| H | -1.61156236 | 5.22641087  | 2.36900641  |
| H | -0.69934612 | 6.42073389  | 1.44435923  |
| H | -2.04187540 | 6.03687237  | -0.70753330 |
| H | -3.08800782 | 5.05315822  | 0.34267558  |
| H | -2.48898958 | 4.39148005  | -1.18863736 |
| H | 7.04321525  | -1.41929182 | -0.23513799 |
| H | 6.92169229  | -3.38946188 | -1.73670580 |
| H | 4.75538653  | -4.56222541 | -2.06676360 |
| H | 4.13484412  | 0.10258112  | 1.56164264  |
| H | -0.70297748 | -3.00155576 | 0.55572410  |
| H | 6.65482005  | 0.78441321  | -0.03564837 |
| H | 5.78330428  | 1.86224234  | 1.07180550  |
| H | 4.96466956  | 1.25935691  | -0.38437419 |
| H | 5.60984564  | -1.36750186 | 3.02499679  |
| H | 6.15445047  | 0.32789607  | 3.05813093  |
| H | 7.02571816  | -0.86870657 | 2.08731451  |
| H | -3.15417796 | -4.81530122 | 0.91050447  |
| H | -1.98236643 | -4.79898844 | -0.41239714 |
| H | -3.08952530 | -3.42787291 | -0.19995303 |
| H | 0.15373585  | -4.15738869 | 2.64450163  |
| H | -0.24674228 | -5.33439460 | 1.38108084  |
| H | -1.35801935 | -5.07569348 | 2.74508237  |
| H | -3.81110545 | -3.57156485 | 2.53404231  |
| H | -4.78720344 | -1.95234325 | 4.13690578  |
| H | -3.58280917 | 0.15529411  | 4.65887960  |
| H | 1.50752681  | -3.48987968 | -0.54154838 |
| H | -0.31899242 | 1.13936929  | 3.08924344  |

|   |             |             |             |
|---|-------------|-------------|-------------|
| H | 2.77181670  | -4.94493650 | -2.92809991 |
| H | 1.88924913  | -3.38854641 | -2.96356764 |
| H | 1.05082255  | -4.87657654 | -2.50109757 |
| H | 1.52186532  | -5.97713365 | -0.24889354 |
| H | 2.63172411  | -5.22013030 | 0.91930268  |
| H | 3.27467354  | -6.01862332 | -0.52747032 |
| H | -2.47939285 | 2.33196729  | 2.58531334  |
| H | -1.49109375 | 3.17926880  | 3.79964736  |
| H | -2.91311419 | 2.25440158  | 4.30359812  |
| H | 0.06547439  | 0.08858592  | 5.34101518  |
| H | -1.44295800 | 0.80197413  | 5.93233192  |
| H | -0.08618982 | 1.85578992  | 5.48144306  |
| O | -0.11937803 | -0.51119243 | -2.04429368 |
| O | 0.49790210  | -1.76284286 | -1.39432296 |
| C | 2.24564160  | 2.05514356  | 3.13430511  |
| H | 1.66636473  | 1.33257143  | 3.70373606  |
| C | 1.63885029  | 2.75014616  | 2.10238097  |
| H | 0.56229862  | 2.73312041  | 1.97879712  |
| O | 2.16756750  | 1.34049965  | 0.96503079  |
| H | 2.15614989  | 3.56256121  | 1.60244723  |
| C | 3.68019961  | 2.24925935  | 3.54128874  |
| H | 4.18888563  | 1.29242598  | 3.70721109  |
| H | 4.23369513  | 2.80607336  | 2.77816671  |
| H | 3.73917214  | 2.81183967  | 4.48774471  |

## Oxo Peroxo Complex to Dioxo Complex (conformation 1 higher energy)

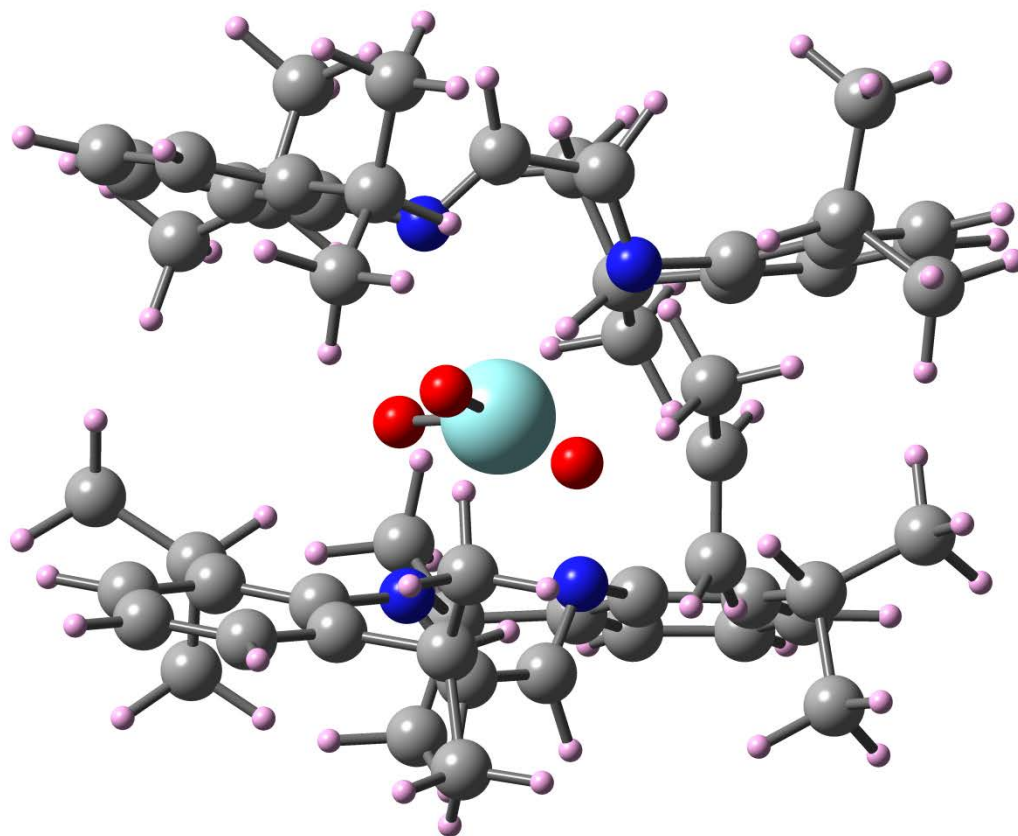

Fig. S40: NCCN Oxo Peroxo Complex to Dioxo Complex (conformation 1 higher energy)

| SCF            | E <sub>ZP</sub> | H            | G            | imag freq (cm <sup>-1</sup> ) |
|----------------|-----------------|--------------|--------------|-------------------------------|
| -2633.71649206 | -2632.491787    | -2632.419069 | -2632.598800 | -498                          |

|    |             |             |             |
|----|-------------|-------------|-------------|
| Zr | -0.12997200 | -0.00694400 | -0.05016100 |
| O  | -0.44239300 | -0.60689600 | -1.77987800 |
| N  | 1.59518900  | 1.94195200  | -0.15510500 |
| N  | -1.11586300 | 2.26369100  | -0.90012600 |
| N  | -1.55939700 | -2.11096000 | 0.71185500  |
| N  | 1.25715500  | -2.10119100 | 0.28945900  |
| C  | 1.01842700  | 3.11124200  | -0.28045200 |
| C  | -0.40704200 | 3.28831500  | -0.52317900 |
| C  | -0.80261400 | -3.04219700 | 1.20369200  |
| C  | 0.61169500  | -3.10072400 | 0.82432900  |
| C  | 3.06126900  | 1.98512400  | -0.11846300 |
| C  | 3.75134700  | 2.61108200  | 0.96207300  |
| C  | 5.16064800  | 2.67815300  | 0.89287700  |
| C  | 5.86649400  | 2.15319800  | -0.19588100 |
| C  | 5.16651400  | 1.56101500  | -1.25823200 |
| C  | 3.75966800  | 1.47849800  | -1.25519200 |

|   |             |             |             |
|---|-------------|-------------|-------------|
| C | 3.67154600  | 2.77353600  | 3.52113600  |
| C | 3.06127600  | 3.25201600  | 2.17715600  |
| C | 3.13712800  | 4.80377100  | 2.11128000  |
| C | -4.14807900 | 2.50602900  | 2.01024600  |
| C | -3.20423400 | 3.28725900  | 1.06299100  |
| C | -3.31615400 | 4.81643100  | 1.30857400  |
| C | -2.48947600 | 2.44772600  | -1.30557700 |
| C | -3.47774700 | 2.94224400  | -0.40577400 |
| C | -4.79091000 | 3.09128400  | -0.90189000 |
| C | -5.11589900 | 2.77981000  | -2.22903300 |
| C | -4.12004500 | 2.31128100  | -3.10211000 |
| C | -2.79385400 | 2.13557500  | -2.66506000 |
| C | 3.83827500  | 0.02047900  | -3.37789400 |
| C | 3.01461700  | 0.99338700  | -2.50520900 |
| C | 2.59300800  | 2.21374300  | -3.37376100 |
| C | -2.14555400 | 0.84001100  | -4.79856600 |
| C | -1.68072100 | 1.75709600  | -3.64660800 |
| C | -1.04511300 | 3.05086000  | -4.23200700 |
| C | -2.98480300 | -2.13492600 | 0.94557000  |
| C | -3.82292600 | -2.21698400 | -0.20738800 |
| C | -5.21573600 | -2.26071700 | -0.01025300 |
| C | -5.77235600 | -2.22378200 | 1.27835900  |
| C | -4.93204500 | -2.14321100 | 2.39552400  |
| C | -3.52760900 | -2.09772800 | 2.26255800  |
| C | -4.14143500 | -1.85327000 | -2.73331900 |
| C | -3.22307500 | -2.37447600 | -1.60640800 |
| C | -2.88196400 | -3.86993800 | -1.86911700 |
| C | 4.99979700  | -0.89904700 | 2.18201300  |
| C | 3.75367800  | -1.74296800 | 1.83028300  |
| C | 3.63218300  | -2.92764500 | 2.83142900  |
| C | 2.54124000  | -2.46297200 | -0.32580000 |
| C | 3.75217600  | -2.26788700 | 0.39176300  |
| C | 4.95594500  | -2.68027200 | -0.21534700 |
| C | 4.95983300  | -3.28459300 | -1.48204000 |
| C | 3.75072400  | -3.48461000 | -2.16233500 |
| C | 2.51572900  | -3.08202600 | -1.60882200 |
| C | -3.08927000 | -0.70793700 | 4.34550500  |
| C | -2.68179100 | -1.96268400 | 3.53310700  |
| C | -2.76863300 | -3.24135400 | 4.40874700  |
| C | 1.24757200  | -2.83797600 | -3.82541500 |
| C | 1.21933300  | -3.38113300 | -2.37563400 |
| C | 0.93496400  | -4.90842900 | -2.37039900 |
| H | 1.62119400  | 4.02237600  | -0.28617800 |
| H | -0.80967200 | 4.30175100  | -0.46553700 |
| H | -1.19324900 | -3.87033400 | 1.80089100  |
| H | 1.08876100  | -4.08131500 | 0.91324100  |
| H | 5.70867900  | 3.14819900  | 1.70488000  |
| H | 6.95163200  | 2.21440800  | -0.22375800 |
| H | 5.71876800  | 1.17451100  | -2.10790000 |
| H | 2.00247300  | 2.97101900  | 2.17755000  |
| H | -2.19533300 | 2.95174200  | 1.31779900  |
| H | 4.69584700  | 3.14449600  | 3.65128500  |

|   |             |             |             |
|---|-------------|-------------|-------------|
| H | 3.69957300  | 1.68094300  | 3.59116100  |
| H | 3.07482900  | 3.15410300  | 4.35977200  |
| H | 4.18102400  | 5.14244600  | 2.12532300  |
| H | 2.62616200  | 5.24691100  | 2.97621300  |
| H | 2.67481700  | 5.20664100  | 1.20148400  |
| H | -5.20307800 | 2.76909200  | 1.85394000  |
| H | -3.89901500 | 2.73191700  | 3.05655900  |
| H | -4.01655100 | 1.43224200  | 1.85015700  |
| H | -2.62927300 | 5.38791000  | 0.66807700  |
| H | -3.08219600 | 5.05170000  | 2.35599500  |
| H | -4.33237300 | 5.17920400  | 1.10339600  |
| H | -5.56939400 | 3.44827600  | -0.23270200 |
| H | -6.13688800 | 2.90385900  | -2.58312400 |
| H | -4.37531800 | 2.08389200  | -4.13262300 |
| H | 2.09583400  | 0.47446700  | -2.20098000 |
| H | -0.92376900 | 1.19801900  | -3.08380100 |
| H | 4.67302500  | 0.53193300  | -3.87671900 |
| H | 3.19788700  | -0.39581400 | -4.16394600 |
| H | 4.23850300  | -0.81371900 | -2.79415300 |
| H | 3.47974600  | 2.76800100  | -3.71062700 |
| H | 1.94114800  | 2.90721700  | -2.83173500 |
| H | 2.04547100  | 1.86920600  | -4.25946400 |
| H | -2.63421700 | -0.05754700 | -4.40932900 |
| H | -1.27405000 | 0.51980400  | -5.38478900 |
| H | -2.83576700 | 1.34770700  | -5.48725100 |
| H | -1.79172500 | 3.62856700  | -4.79471000 |
| H | -0.22424600 | 2.79842700  | -4.91633500 |
| H | -0.64118700 | 3.70186300  | -3.44565500 |
| H | -5.87339300 | -2.32522800 | -0.87088700 |
| H | -6.85188100 | -2.25531300 | 1.40767400  |
| H | -5.36895300 | -2.10304200 | 3.38999100  |
| H | -2.28669600 | -1.80255500 | -1.65207400 |
| H | 2.87046200  | -1.10332600 | 1.95512800  |
| H | -5.05813800 | -2.45120400 | -2.83473100 |
| H | -3.60909600 | -1.91515500 | -3.69072500 |
| H | -4.42367400 | -0.80673300 | -2.56781300 |
| H | -2.19498400 | -4.27197900 | -1.11364500 |
| H | -2.40326700 | -3.97926400 | -2.85158100 |
| H | -3.79221800 | -4.48633400 | -1.86042200 |
| H | 5.90756700  | -1.51550400 | 2.22015300  |
| H | 4.87499000  | -0.44961600 | 3.17583000  |
| H | 5.16114600  | -0.09389300 | 1.45909300  |
| H | 2.71168900  | -3.50413500 | 2.67899000  |
| H | 3.63406500  | -2.55902100 | 3.86551000  |
| H | 4.48007700  | -3.61496400 | 2.71249100  |
| H | 5.89467300  | -2.54083600 | 0.31207400  |
| H | 5.89746800  | -3.60484700 | -1.93007300 |
| H | 3.75929400  | -3.96397000 | -3.13759400 |
| H | -1.64155200 | -1.79649600 | 3.24693000  |
| H | 0.38894900  | -2.85678300 | -1.89530800 |
| H | -4.13606500 | -0.74900300 | 4.67473500  |
| H | -2.94120600 | 0.18709300  | 3.73446100  |



|   |             |             |             |
|---|-------------|-------------|-------------|
| H | -2.46258600 | -0.62299700 | 5.24483300  |
| H | -2.12863300 | -3.14161000 | 5.29652000  |
| H | -2.45056100 | -4.13788300 | 3.85792900  |
| H | -3.79522100 | -3.41883200 | 4.75621500  |
| H | 1.30053900  | -1.74543800 | -3.81239300 |
| H | 0.31679100  | -3.11377400 | -4.33767600 |
| H | 2.08641700  | -3.23817000 | -4.41137900 |
| H | 0.87306300  | -5.31114300 | -1.34980600 |
| H | 1.72479200  | -5.46256200 | -2.89580800 |
| H | -0.01762300 | -5.11723000 | -2.87344800 |
| O | -1.64712000 | 0.65867800  | 0.99995000  |
| O | -0.39199900 | 0.10975400  | 2.29902400  |
| C | 0.81263300  | 0.64986500  | 3.57225400  |
| H | 1.64769000  | 0.97691300  | 2.95683600  |
| C | 0.79572700  | -0.68578500 | 3.96939300  |
| H | 1.47390100  | -1.41822100 | 3.55118100  |
| H | 0.06368900  | -1.03697400 | 4.68999500  |
| C | 0.08601600  | 1.74314000  | 4.32458100  |
| H | -0.79318400 | 1.33658100  | 4.83427800  |
| H | 0.74129500  | 2.20850600  | 5.07640600  |
| H | -0.25858500 | 2.52045700  | 3.63313900  |

## Oxo Peroxo Complex to Dioxo Complex (conformation 2 lower energy)

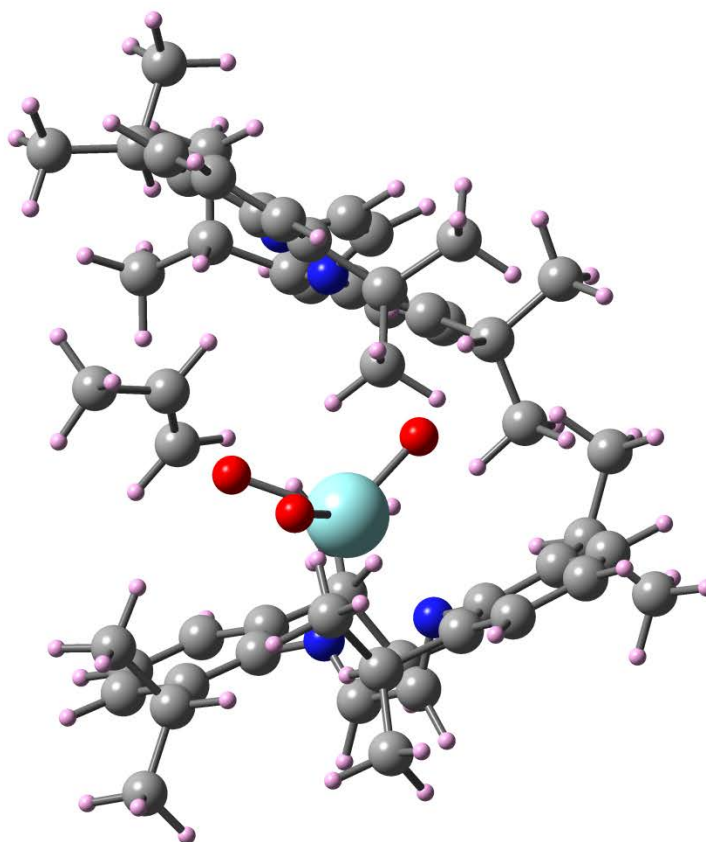

Fig. S41: NCCN Oxo Peroxo Complex to Dioxo Complex (conformation 2 lower energy)

| SCF          | E <sub>ZP</sub> | H            | G            | imag freq (cm <sup>-1</sup> ) |
|--------------|-----------------|--------------|--------------|-------------------------------|
| -2633.728137 | -2632.506419    | -2632.431876 | -2632.623680 | -413                          |

|    |             |             |             |
|----|-------------|-------------|-------------|
| Zr | -1.26965387 | -0.12826453 | -0.12417774 |
| O  | -0.36157478 | 0.22940871  | 1.44631941  |
| N  | -2.48672777 | -2.15253851 | -0.76616501 |
| N  | -3.57570080 | -0.03288912 | 0.65639504  |
| N  | 3.05567243  | 2.23317179  | -0.06659976 |
| N  | 3.32361019  | -0.45603067 | 1.10513519  |
| C  | -3.77423620 | -2.08492134 | -0.57100605 |
| C  | -4.35269345 | -0.97424484 | 0.20275148  |
| C  | 3.10548931  | 1.98716557  | 1.20285219  |
| C  | 3.33133310  | 0.64694351  | 1.78128867  |
| C  | -1.93960392 | -3.13420899 | -1.68110366 |
| C  | -2.23531780 | -3.03644935 | -3.07223302 |
| C  | -1.63703488 | -3.98944367 | -3.92571859 |
| C  | -0.79005960 | -4.98904845 | -3.42879729 |
| C  | -0.49943325 | -5.04815707 | -2.05511801 |
| C  | -1.05637912 | -4.12015316 | -1.15623642 |

|   |             |             |             |
|---|-------------|-------------|-------------|
| C | -2.17137744 | -0.96285037 | -4.53739644 |
| C | -3.07223435 | -1.91160954 | -3.69993302 |
| C | -4.24773332 | -2.47067819 | -4.54279816 |
| C | -4.50025498 | 3.07482467  | -1.76705705 |
| C | -5.16753700 | 1.91031811  | -0.98770421 |
| C | -6.68268144 | 1.80775207  | -1.30704583 |
| C | -4.14618025 | 1.13829737  | 1.29771287  |
| C | -4.92134890 | 2.05011405  | 0.52153624  |
| C | -5.43270689 | 3.18713731  | 1.18211484  |
| C | -5.19502271 | 3.41195136  | 2.54513231  |
| C | -4.41851208 | 2.50295642  | 3.27982413  |
| C | -3.86862332 | 1.35542179  | 2.67556450  |
| C | 0.61056227  | -4.78234133 | 0.68932097  |
| C | -0.78475547 | -4.21313012 | 0.34820285  |
| C | -1.89351199 | -5.04812928 | 1.04945249  |
| C | -1.91007620 | 1.04065593  | 4.28120035  |
| C | -3.07601992 | 0.35787290  | 3.52542791  |
| C | -4.02431340 | -0.39629154 | 4.49764258  |
| C | 2.84341723  | 3.54417521  | -0.58810485 |
| C | 1.77304742  | 4.39250038  | -0.16228069 |
| C | 1.66865622  | 5.66439916  | -0.76691636 |
| C | 2.56727064  | 6.09125057  | -1.75446938 |
| C | 3.59002490  | 5.22984184  | -2.18819723 |
| C | 3.73730506  | 3.94821453  | -1.62994768 |
| C | -0.72705835 | 4.17281001  | 0.33165468  |
| C | 0.71338197  | 3.98385142  | 0.87275819  |
| C | 0.89918261  | 4.76972397  | 2.19993123  |
| C | 5.47668290  | -3.16920447 | -1.27611669 |
| C | 5.19554685  | -2.05531227 | -0.24176354 |
| C | 6.50637525  | -1.29838726 | 0.11156926  |
| C | 3.57262617  | -1.72152078 | 1.71488301  |
| C | 4.51002515  | -2.55994411 | 1.03056559  |
| C | 4.83453960  | -3.80920950 | 1.58924478  |
| C | 4.23485081  | -4.24361375 | 2.78421307  |
| C | 3.27598371  | -3.43704114 | 3.41413856  |
| C | 2.91022931  | -2.17262907 | 2.90153764  |
| C | 5.21468544  | 3.11384778  | -3.56580041 |
| C | 4.87765663  | 3.02180299  | -2.05956911 |
| C | 6.14714190  | 3.28935799  | -1.20316646 |
| C | 0.53891358  | -2.25574260 | 3.85566416  |
| C | 1.79668265  | -1.38376643 | 3.60913255  |
| C | 2.28985297  | -0.79126876 | 4.95753741  |
| H | -4.45744423 | -2.81838362 | -1.00463557 |
| H | -5.43481196 | -0.95270747 | 0.34448282  |
| H | 3.03380612  | 2.78563423  | 1.95334562  |
| H | 3.54587073  | 0.66530519  | 2.85802084  |
| H | -1.83090337 | -3.93684148 | -4.99362571 |
| H | -0.34695091 | -5.71276099 | -4.10833820 |
| H | 0.17042859  | -5.81717734 | -1.68449365 |
| H | -3.50724715 | -1.29026557 | -2.91006393 |
| H | -4.68645881 | 0.99763681  | -1.35446292 |
| H | -1.66074549 | -1.50769740 | -5.34298589 |

|   |             |             |             |
|---|-------------|-------------|-------------|
| H | -1.42327440 | -0.47912341 | -3.89943040 |
| H | -2.78405222 | -0.17519083 | -4.99527225 |
| H | -3.88684019 | -3.04285611 | -5.40651426 |
| H | -4.85886065 | -1.64422815 | -4.92764086 |
| H | -4.89585749 | -3.13323354 | -3.95260535 |
| H | -4.87910275 | 4.05158622  | -1.43851968 |
| H | -4.70896424 | 2.97370380  | -2.84084855 |
| H | -3.41402031 | 3.04085988  | -1.63145850 |
| H | -7.15624132 | 0.96723746  | -0.78014402 |
| H | -6.83284819 | 1.66692836  | -2.38550806 |
| H | -7.21542942 | 2.72158602  | -1.01470427 |
| H | -6.01488791 | 3.90852731  | 0.61516728  |
| H | -5.60577976 | 4.29388951  | 3.03042835  |
| H | -4.23738587 | 2.68429863  | 4.33566320  |
| H | -0.83559047 | -3.19591752 | 0.76614164  |
| H | -2.61482067 | -0.38044233 | 2.86101899  |
| H | 0.69117575  | -5.84507017 | 0.42593099  |
| H | 0.79730206  | -4.69876391 | 1.76549249  |
| H | 1.41098285  | -4.23834971 | 0.17383039  |
| H | -1.88909441 | -6.08105872 | 0.67721013  |
| H | -2.89328520 | -4.63097792 | 0.87242322  |
| H | -1.72299689 | -5.07405676 | 2.13326772  |
| H | -1.16932154 | 1.40233994  | 3.56060361  |
| H | -1.41375540 | 0.31279884  | 4.93694028  |
| H | -2.25379318 | 1.87328948  | 4.90932041  |
| H | -4.47910973 | 0.29234024  | 5.22220822  |
| H | -3.46541166 | -1.15609232 | 5.05982706  |
| H | -4.83974260 | -0.89921419 | 3.95915043  |
| H | 0.86195705  | 6.32664946  | -0.46347710 |
| H | 2.46414374  | 7.08114784  | -2.19337053 |
| H | 4.27123070  | 5.55871235  | -2.96806344 |
| H | 0.81075178  | 2.91601837  | 1.09522086  |
| H | 4.51570935  | -1.32600168 | -0.69864482 |
| H | -0.93987679 | 5.22229650  | 0.08587428  |
| H | -1.44962018 | 3.85613614  | 1.09630807  |
| H | -0.89593308 | 3.55183087  | -0.55453060 |
| H | 1.90412432  | 4.63454747  | 2.62302646  |
| H | 0.16534436  | 4.43246570  | 2.94423996  |
| H | 0.75199044  | 5.84701278  | 2.04264870  |
| H | 6.23622640  | -3.88050818 | -0.92401361 |
| H | 5.85418112  | -2.72480862 | -2.20665341 |
| H | 4.56549161  | -3.73266976 | -1.51528572 |
| H | 6.30806227  | -0.45853426 | 0.78862085  |
| H | 6.97605038  | -0.89743579 | -0.79713570 |
| H | 7.22589052  | -1.96890868 | 0.60153358  |
| H | 5.56025253  | -4.44689023 | 1.09202776  |
| H | 4.50420620  | -5.20639242 | 3.21283648  |
| H | 2.79588004  | -3.79565279 | 4.32145421  |
| H | 4.55355381  | 1.99663160  | -1.84079593 |
| H | 1.45854932  | -0.56652809 | 2.96237829  |
| H | 5.65662814  | 4.08378559  | -3.83079098 |
| H | 4.32075533  | 2.96839855  | -4.18548676 |

|   |             |             |             |
|---|-------------|-------------|-------------|
| H | 5.94694594  | 2.33980657  | -3.83305068 |
| H | 6.95090536  | 2.59086792  | -1.47434753 |
| H | 5.93584253  | 3.16628251  | -0.13376139 |
| H | 6.51484600  | 4.31263764  | -1.36078860 |
| H | 0.16253558  | -2.66591392 | 2.91196555  |
| H | -0.25587219 | -1.63505878 | 4.28663610  |
| H | 0.73377641  | -3.08758389 | 4.54656205  |
| H | 3.16849119  | -0.14630376 | 4.82771264  |
| H | 2.57199863  | -1.58877722 | 5.65903616  |
| H | 1.49502552  | -0.19363432 | 5.42396705  |
| O | -1.68992474 | 1.36780263  | -1.32272296 |
| O | -0.18544770 | 0.26665487  | -1.85813111 |
| C | 1.38030387  | -1.35509860 | -2.16944193 |
| H | 1.48945428  | -1.84613695 | -1.20413244 |
| H | 0.99051433  | -1.94473179 | -2.99583915 |
| C | 1.77826934  | -0.04246594 | -2.33303643 |
| H | 2.22432881  | 0.47708420  | -1.48568554 |
| C | 1.84675055  | 0.65780393  | -3.66564924 |
| H | 1.40271809  | 1.65522366  | -3.58056912 |
| H | 2.89588262  | 0.77918557  | -3.97526262 |
| H | 1.31378742  | 0.10108063  | -4.44503673 |

## Dioxo Complex to Oxo Ozone Complex

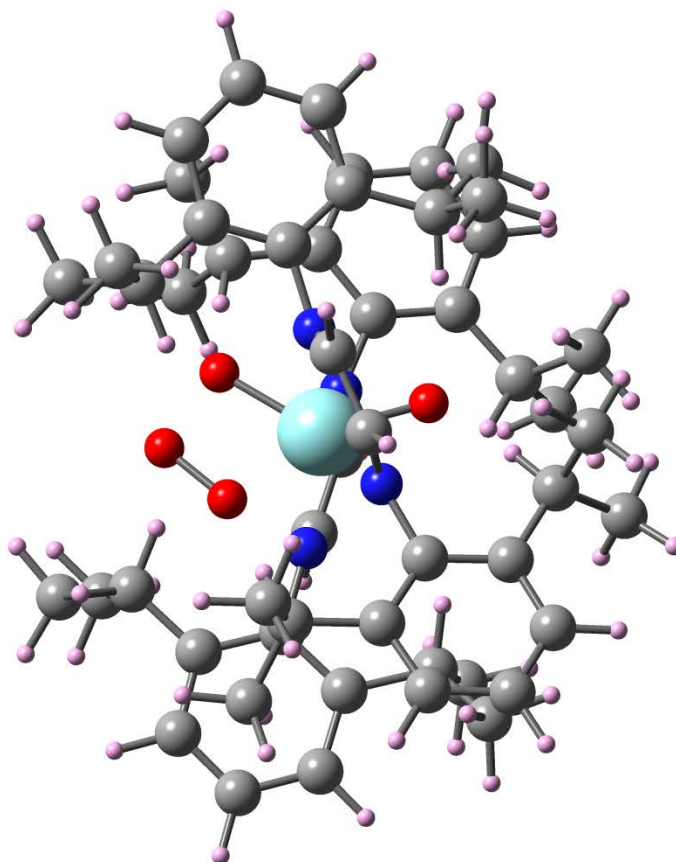

Fig. S42: NCCN Dioxo Complex to Oxo Ozone Complex

| SCF          | E <sub>ZP</sub> | H            | G            | imag freq<br>(cm <sup>-1</sup> ) |
|--------------|-----------------|--------------|--------------|----------------------------------|
| -2591.018581 | -2589.874273    | -2589.804646 | -2589.979601 | -152                             |

|   |             |             |             |
|---|-------------|-------------|-------------|
| O | -1.31959010 | 0.54361904  | 1.79240514  |
| O | 1.19089909  | 1.53904612  | 1.39135810  |
| O | -0.49124204 | -0.76034206 | -1.34938310 |
| N | -1.18234709 | 2.14001316  | -0.67574505 |
| N | 1.47757211  | 1.51528411  | -1.39242911 |
| N | 1.26164010  | -1.57738412 | 1.40935911  |
| N | -1.46555011 | -2.10582816 | 0.79828306  |
| C | -0.45097503 | 2.97278423  | -1.34676210 |
| C | 0.92901907  | 2.64035720  | -1.73065813 |
| C | 0.66412205  | -2.68882221 | 1.73691513  |
| C | -0.69518005 | -3.01778323 | 1.30455310  |
| C | -2.59295220 | 2.48077519  | -0.47496504 |
| C | -3.53626527 | 1.92066314  | -1.38172310 |
| C | -4.89205337 | 2.26449817  | -1.20528109 |
| C | -5.29599442 | 3.13215124  | -0.17808701 |
| C | -4.34183933 | 3.67506428  | 0.69294005  |

|   |             |             |             |
|---|-------------|-------------|-------------|
| C | -2.97015022 | 3.36377626  | 0.56880004  |
| C | -4.11424431 | -0.07066701 | -2.90334322 |
| C | -3.10053524 | 1.04666408  | -2.56450520 |
| C | -2.85394122 | 1.93122715  | -3.81990629 |
| C | 1.86181914  | -1.52670512 | -4.36722733 |
| C | 1.62583313  | -0.10586201 | -3.80103829 |
| C | 1.09637408  | 0.83079406  | -4.92206038 |
| C | 2.80472021  | 1.25792909  | -1.95401815 |
| C | 2.87904322  | 0.49269404  | -3.15102924 |
| C | 4.14421432  | 0.35829203  | -3.75881328 |
| C | 5.29043740  | 0.93987607  | -3.19346824 |
| C | 5.19121740  | 1.66027712  | -1.99390515 |
| C | 3.94950930  | 1.83891414  | -1.34516710 |
| C | -2.34342018 | 3.71062528  | 3.01305823  |
| C | -1.96680015 | 3.99540030  | 1.53785112  |
| C | -1.83250414 | 5.52051645  | 1.28025810  |
| C | 4.94119238  | 2.24585317  | 0.97920108  |
| C | 3.86724430  | 2.66474820  | -0.05533000 |
| C | 3.98177430  | 4.18363532  | -0.36018503 |
| C | 2.64016420  | -1.44240111 | 1.90322815  |
| C | 2.86456022  | -0.89314407 | 3.19288724  |
| C | 4.19666432  | -0.84545007 | 3.65618828  |
| C | 5.25915840  | -1.32351010 | 2.87565722  |
| C | 5.00706338  | -1.86515414 | 1.60623712  |
| C | 3.69527228  | -1.94084815 | 1.09219408  |
| C | 2.04188615  | 0.90323907  | 4.82451237  |
| C | 1.72074613  | -0.42475103 | 4.09860231  |
| C | 1.35802910  | -1.52902512 | 5.13028639  |
| C | -1.68651213 | -3.38848926 | -3.11392024 |
| C | -1.63123513 | -3.85248529 | -1.63610712 |
| C | -1.49456211 | -5.39528639 | -1.53940512 |
| C | -2.76175821 | -2.49576719 | 0.28829602  |
| C | -2.84935622 | -3.34992726 | -0.84939307 |
| C | -4.13936331 | -3.71572828 | -1.29099510 |
| C | -5.29370938 | -3.25922325 | -0.64034705 |
| C | -5.18010240 | -2.40802718 | 0.47123104  |
| C | -3.92103430 | -2.00499315 | 0.95722107  |
| C | 4.55646435  | -2.33153818 | -1.29586310 |
| C | 3.43600226  | -2.60687520 | -0.26615502 |
| C | 3.25640525  | -4.14359332 | -0.10583401 |
| C | -4.94640038 | -0.13252201 | 2.39455418  |
| C | -3.80120029 | -1.15462609 | 2.22290117  |
| C | -3.70376328 | -2.06943916 | 3.47656026  |
| H | -5.63639341 | 1.85173914  | -1.87943215 |
| H | -6.34732748 | 3.38477126  | -0.06107500 |
| H | -4.66071035 | 4.34695033  | 1.48547712  |
| H | -2.15847317 | 0.54930004  | -2.30496418 |
| H | 0.84781206  | -0.20329402 | -3.03364223 |
| H | -5.05628239 | 0.33081403  | -3.30179625 |
| H | -4.34265533 | -0.68247405 | -2.02412315 |
| H | -3.69009528 | -0.73144105 | -3.67005028 |
| H | -3.77955029 | 2.43549919  | -4.13002531 |

|   |             |             |             |
|---|-------------|-------------|-------------|
| H | -2.50314619 | 1.31335610  | -4.65729236 |
| H | -2.09903016 | 2.70723021  | -3.63547128 |
| H | 2.55931120  | -1.53080512 | -5.21621440 |
| H | 0.90895607  | -1.94236615 | -4.71826636 |
| H | 2.25566417  | -2.19862417 | -3.59485628 |
| H | 0.85598806  | 1.83099114  | -4.53772135 |
| H | 0.18239801  | 0.41330603  | -5.36480239 |
| H | 1.84087014  | 0.95064207  | -5.72148246 |
| H | 4.23229132  | -0.20761402 | -4.68201436 |
| H | 6.25534949  | 0.82680006  | -3.68212728 |
| H | 6.08491346  | 2.09635516  | -1.55560812 |
| H | -0.98901407 | 3.53153427  | 1.38926311  |
| H | 2.89537522  | 2.48602719  | 0.41572703  |
| H | -3.30834125 | 4.15949832  | 3.28624425  |
| H | -1.57700612 | 4.12728031  | 3.67971728  |
| H | -2.38920619 | 2.62998920  | 3.18057225  |
| H | -2.78706421 | 6.03933648  | 1.44195711  |
| H | -1.51202312 | 5.73304842  | 0.25036102  |
| H | -1.09155908 | 5.95612844  | 1.96376515  |
| H | 4.88050937  | 1.17546109  | 1.20312309  |
| H | 4.78399536  | 2.79549722  | 1.91625615  |
| H | 5.95896044  | 2.46877319  | 0.63085905  |
| H | 4.94295638  | 4.42016434  | -0.83667406 |
| H | 3.91136530  | 4.76190136  | 0.57039504  |
| H | 3.18398224  | 4.52755635  | -1.03205408 |
| H | 4.40049734  | -0.42930403 | 4.63852635  |
| H | 6.27753250  | -1.27631510 | 3.25407825  |
| H | 5.83575945  | -2.23367317 | 1.00964008  |
| H | 0.83858806  | -0.22830502 | 3.48322727  |
| H | -0.72811205 | -3.39417126 | -1.22371909 |
| H | 2.85035922  | 0.79162106  | 5.56026745  |
| H | 1.15007809  | 1.25282209  | 5.35910040  |
| H | 2.32344218  | 1.67679613  | 4.10290231  |
| H | 1.05250408  | -2.46392219 | 4.64085535  |
| H | 0.52646204  | -1.19456109 | 5.76414743  |
| H | 2.21323617  | -1.75886214 | 5.78068845  |
| H | -2.58731220 | -3.75130929 | -3.62658128 |
| H | -0.81199906 | -3.77091929 | -3.65858228 |
| H | -1.66087513 | -2.29507417 | -3.14928824 |
| H | -1.41722211 | -5.73275044 | -0.49640804 |
| H | -0.59736905 | -5.73253745 | -2.07593616 |
| H | -2.36047718 | -5.90254644 | -1.98504315 |
| H | -4.23660932 | -4.36010733 | -2.16117616 |
| H | -6.27571048 | -3.55942927 | -0.99857707 |
| H | -6.07828445 | -2.05438316 | 0.96802307  |
| H | 2.50098719  | -2.20257817 | -0.67740105 |
| H | -2.86664522 | -0.57717904 | 2.16442217  |
| H | 5.48928340  | -2.84332122 | -1.02409208 |
| H | 4.76499936  | -1.26191009 | -1.39050611 |
| H | 4.25621032  | -2.70643521 | -2.28222317 |
| H | 3.08070124  | -4.60908635 | -1.08465508 |
| H | 2.41155618  | -4.40003833 | 0.54462904  |



|    |             |             |             |
|----|-------------|-------------|-------------|
| H  | 4.15940632  | -4.59235135 | 0.32901003  |
| H  | -5.05706039 | 0.49615704  | 1.50346411  |
| H  | -4.72024136 | 0.52656304  | 3.24231725  |
| H  | -5.91115044 | -0.61692404 | 2.60289020  |
| H  | -2.85811322 | -2.76623221 | 3.40712126  |
| H  | -4.62095235 | -2.66238920 | 3.60167628  |
| H  | -3.56297327 | -1.45905111 | 4.37816433  |
| O  | 0.16981501  | 1.75405013  | 2.35501618  |
| H  | 1.44811511  | 3.36041726  | -2.36863918 |
| H  | -0.85333807 | 3.92295930  | -1.70603513 |
| H  | 1.18436609  | -3.43828126 | 2.33742218  |
| H  | -1.01229807 | -4.05825831 | 1.41781811  |
| Zr | -0.08542301 | 0.13118201  | 0.23002902  |

Oxo  $\eta^2$ -Ozone Complex to Oxo  $\eta^3$ -Ozone Complex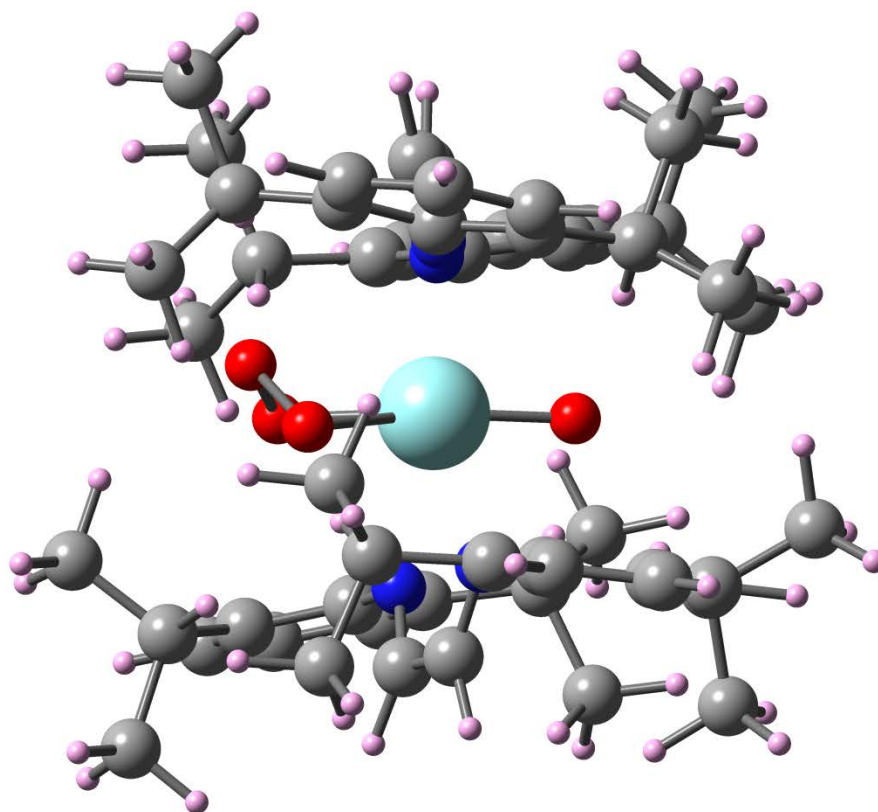Fig. S43: NCCN Oxo  $\eta^2$ -Ozone Complex to Oxo  $\eta^3$ -Ozone Complex

| SCF          | $E_{ZP}$     | H            | G            | imag freq<br>( $\text{cm}^{-1}$ ) |
|--------------|--------------|--------------|--------------|-----------------------------------|
| -2591.039198 | -2589.893025 | -2589.824189 | -2589.996816 | -13                               |

|    |             |             |             |
|----|-------------|-------------|-------------|
| Zr | -0.08402101 | 0.02010300  | -0.11093801 |
| O  | -1.39496510 | 0.12999401  | -1.87134114 |
| N  | 1.35126210  | 2.06452016  | 0.39531403  |
| N  | -1.39165611 | 2.14362716  | -0.14051301 |
| N  | -1.33017810 | -2.13281816 | 0.01965100  |
| N  | 1.42381411  | -2.01565115 | -0.49874804 |
| C  | 0.73318605  | 3.19333024  | 0.22806602  |
| C  | -0.68146505 | 3.23109925  | -0.14725901 |
| C  | -0.67194305 | -3.19030824 | -0.33957403 |
| C  | 0.74420106  | -3.10239224 | -0.71295605 |
| C  | 2.70947120  | 2.15326616  | 0.93660307  |
| C  | 2.86374522  | 2.19195617  | 2.35092118  |
| C  | 4.17042932  | 2.36153718  | 2.85507822  |
| C  | 5.27454040  | 2.48016819  | 1.99650015  |
| C  | 5.08999039  | 2.43456518  | 0.60626105  |
| C  | 3.80575129  | 2.27672417  | 0.04223300  |
| C  | 1.93223215  | 1.25077109  | 4.55598235  |
| C  | 1.66276413  | 2.11900216  | 3.30406525  |

|   |             |             |             |
|---|-------------|-------------|-------------|
| C | 1.22590509  | 3.54530527  | 3.74087629  |
| C | -4.18970932 | 0.91858607  | 2.90435522  |
| C | -3.21199725 | 1.75605413  | 2.05015616  |
| C | -2.91781722 | 3.10415024  | 2.77013121  |
| C | -2.81101322 | 2.25863717  | -0.44344303 |
| C | -3.71906128 | 2.02387816  | 0.62803805  |
| C | -5.09549839 | 2.15955617  | 0.36216003  |
| C | -5.55494043 | 2.52313820  | -0.91427807 |
| C | -4.63851035 | 2.76047321  | -1.94768215 |
| C | -3.24662025 | 2.63778320  | -1.74414313 |
| C | 4.72434136  | 1.57464612  | -2.25028617 |
| C | 3.61076428  | 2.31971518  | -1.47805011 |
| C | 3.52254827  | 3.79037029  | -1.97577515 |
| C | -2.65076120 | 2.05684316  | -4.15732731 |
| C | -2.29896118 | 2.91792222  | -2.91827822 |
| C | -2.29950017 | 4.42722734  | -3.28571425 |
| C | -2.66834120 | -2.34556518 | 0.57979704  |
| C | -3.80143229 | -2.32031118 | -0.27788202 |
| C | -5.06185638 | -2.57676120 | 0.30214402  |
| C | -5.19224539 | -2.86060222 | 1.67019813  |
| C | -4.05370831 | -2.89546522 | 2.48858519  |
| C | -2.76713021 | -2.63858020 | 1.96894515  |
| C | -4.81151737 | -1.25673810 | -2.38744218 |
| C | -3.67126928 | -2.11483616 | -1.79065214 |
| C | -3.60400227 | -3.48798727 | -2.51650419 |
| C | 4.21998632  | -1.43808511 | 2.75715621  |
| C | 3.22793025  | -2.04838216 | 1.74250913  |
| C | 2.88380522  | -3.50315427 | 2.17658317  |
| C | 2.84792322  | -2.06340116 | -0.80439306 |
| C | 3.74773429  | -2.03927316 | 0.29961502  |
| C | 5.12624939  | -2.12866816 | 0.02520800  |
| C | 5.59793640  | -2.25391817 | -1.29189910 |
| C | 4.69043736  | -2.29639717 | -2.35811718 |
| C | 3.29668625  | -2.20668917 | -2.14723716 |
| C | -1.70025213 | -1.93254515 | 4.19189332  |
| C | -1.54169112 | -2.74753221 | 2.88577022  |
| C | -1.23459410 | -4.23728433 | 3.20098125  |
| C | 2.67878721  | -1.15621809 | -4.39162834 |
| C | 2.36495018  | -2.27423017 | -3.36487726 |
| C | 2.43322719  | -3.67249428 | -4.03772931 |
| H | 1.22649609  | 4.14919832  | 0.41704403  |
| H | -1.12421508 | 4.20372232  | -0.36943003 |
| H | -1.11949009 | -4.18609032 | -0.30484802 |
| H | 1.21883309  | -4.00614231 | -1.10109909 |
| H | 4.32281433  | 2.39921818  | 3.93007330  |
| H | 6.27253246  | 2.61024120  | 2.40882218  |
| H | 5.94987843  | 2.52826719  | -0.05047800 |
| H | 0.83575706  | 1.63132812  | 2.77629521  |
| H | -2.26566917 | 1.20234609  | 1.98739415  |
| H | 2.70044121  | 1.68272013  | 5.21242940  |
| H | 2.24381817  | 0.24090002  | 4.27085832  |
| H | 1.00840408  | 1.16132309  | 5.14210439  |

|   |             |             |             |
|---|-------------|-------------|-------------|
| H | 2.03157816  | 4.05404531  | 4.28835533  |
| H | 0.34970803  | 3.48736027  | 4.40042634  |
| H | 0.95942308  | 4.17646532  | 2.88285822  |
| H | -5.10552639 | 1.47655011  | 3.14391324  |
| H | -3.71241328 | 0.65369805  | 3.85600630  |
| H | -4.47178434 | -0.01160600 | 2.39998818  |
| H | -2.18770217 | 3.71310728  | 2.22245117  |
| H | -2.51261419 | 2.91608022  | 3.77315129  |
| H | -3.83773729 | 3.69543228  | 2.87645922  |
| H | -5.81206242 | 1.98623515  | 1.15853109  |
| H | -6.62182950 | 2.62346020  | -1.09988308 |
| H | -5.00502238 | 3.03856423  | -2.93219823 |
| H | 2.66387920  | 1.82488114  | -1.72387913 |
| H | -1.28475310 | 2.62595520  | -2.63220220 |
| H | 5.69681746  | 2.07817616  | -2.16092017 |
| H | 4.47019434  | 1.53926712  | -3.31729125 |
| H | 4.83310437  | 0.54502104  | -1.89538215 |
| H | 4.44839734  | 4.33721333  | -1.74972814 |
| H | 2.69117021  | 4.33516533  | -1.50999511 |
| H | 3.36891926  | 3.81120529  | -3.06270923 |
| H | -2.60437020 | 0.99716808  | -3.89131730 |
| H | -1.92278815 | 2.24316417  | -4.95830238 |
| H | -3.64905928 | 2.29065717  | -4.55180135 |
| H | -3.29269625 | 4.75282136  | -3.62280828 |
| H | -1.58871912 | 4.61841735  | -4.10063731 |
| H | -2.01862016 | 5.06107939  | -2.43285218 |
| H | -5.94650143 | -2.56084020 | -0.32761603 |
| H | -6.17379349 | -3.06014324 | 2.09389816  |
| H | -4.16050232 | -3.12593324 | 3.54521727  |
| H | -2.74116021 | -1.57107512 | -1.98201315 |
| H | 2.29933018  | -1.46280211 | 1.78297814  |
| H | -5.78208246 | -1.77123614 | -2.35330018 |
| H | -4.59226635 | -1.03907008 | -3.44080226 |
| H | -4.90619537 | -0.30101602 | -1.86073214 |
| H | -2.75813821 | -4.09550231 | -2.16780017 |
| H | -3.48666327 | -3.33851425 | -3.59801827 |
| H | -4.52240034 | -4.06756631 | -2.34843218 |
| H | 5.12218039  | -2.05531816 | 2.86566522  |
| H | 3.74800828  | -1.38270910 | 3.74580529  |
| H | 4.52269534  | -0.42627103 | 2.46917619  |
| H | 2.14466617  | -3.96997430 | 1.51443911  |
| H | 2.47111619  | -3.50597727 | 3.19399824  |
| H | 3.78570529  | -4.13020331 | 2.17019017  |
| H | 5.83621343  | -2.10888616 | 0.84535407  |
| H | 6.66629251  | -2.32295618 | -1.48256611 |
| H | 5.06320938  | -2.39704018 | -3.37401126 |
| H | -0.68359505 | -2.30322017 | 2.37475118  |
| H | 1.33494110  | -2.10057216 | -3.04395823 |
| H | -2.56172020 | -2.25732017 | 4.79130237  |
| H | -1.80507614 | -0.86967007 | 3.95477830  |
| H | -0.80004406 | -2.04908616 | 4.80992337  |
| H | -0.32863203 | -4.31724233 | 3.81679229  |

|   |             |             |             |
|---|-------------|-------------|-------------|
| H | -1.07562008 | -4.82437437 | 2.28555017  |
| H | -2.06143816 | -4.70511836 | 3.75261228  |
| H | 2.53452319  | -0.17644501 | -3.92733230 |
| H | 1.99096815  | -1.23287410 | -5.24407840 |
| H | 3.70452828  | -1.22835010 | -4.77811736 |
| H | 2.17625517  | -4.47923934 | -3.33669326 |
| H | 3.43939626  | -3.88212029 | -4.42429634 |
| H | 1.73296113  | -3.71908229 | -4.88215137 |
| O | -0.12503601 | -0.09131401 | 1.73863113  |
| O | -0.11798801 | -0.37676203 | -2.52005419 |
| O | 1.02646308  | 0.47007704  | -1.93954115 |

Oxo  $\eta^3$ -Ozone Complex to Oxo Peroxo Complex (conformation 1 lower energy)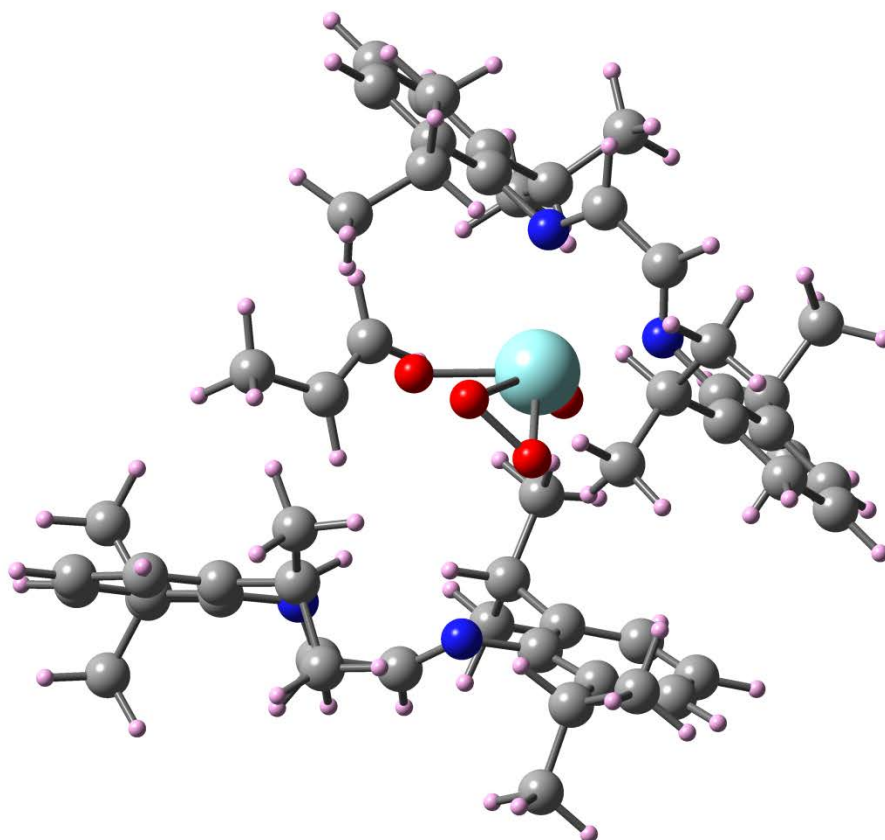Fig. S44: NCCN Oxo  $\eta^3$ -Ozone Complex to Oxo Peroxo Complex (conformation 1 lower energy)

| SCF          | E <sub>ZP</sub> | H            | G            | imag freq (cm <sup>-1</sup> ) |
|--------------|-----------------|--------------|--------------|-------------------------------|
| -2708.897571 | -2707.673475    | -2707.597426 | -2707.794180 | -326                          |

|    |             |             |             |
|----|-------------|-------------|-------------|
| Zr | 1.36580329  | 0.37789739  | -0.11658474 |
| O  | -0.14795035 | 1.73523140  | 0.41224407  |
| N  | -2.72544167 | -2.44821398 | -0.45899147 |
| N  | -4.26219410 | -0.10262565 | 0.36267883  |
| N  | 3.01284269  | 2.10454326  | -0.52062609 |
| N  | 3.58962541  | -0.38203322 | 0.52832225  |
| C  | -3.96460440 | -2.24497067 | -0.76624034 |
| C  | -4.77723368 | -1.17259546 | -0.14507004 |
| C  | 4.15643746  | 1.89864493  | 0.06611326  |
| C  | 4.45712280  | 0.58037205  | 0.65074423  |
| C  | -1.96042647 | -3.50540483 | -1.03361378 |
| C  | -1.76586841 | -3.63628983 | -2.44071029 |
| C  | -1.00812264 | -4.73527429 | -2.89898880 |
| C  | -0.44989653 | -5.66463025 | -2.00948329 |
| C  | -0.60094331 | -5.48347621 | -0.62282515 |

|   |             |             |             |
|---|-------------|-------------|-------------|
| C | -1.33628859 | -4.39975601 | -0.11078876 |
| C | -1.01451539 | -1.92288759 | -4.15204949 |
| C | -2.23465622 | -2.58659880 | -3.45696344 |
| C | -3.22136058 | -3.17946013 | -4.49611345 |
| C | -6.50627015 | 2.60026818  | -1.90567341 |
| C | -6.57910394 | 1.30946715  | -1.04760152 |
| C | -8.00183391 | 0.69300170  | -1.10801905 |
| C | -5.03316327 | 0.90503977  | 1.01724034  |
| C | -6.13480350 | 1.56976836  | 0.39912379  |
| C | -6.80503670 | 2.56520696  | 1.14415640  |
| C | -6.40552677 | 2.90147259  | 2.44526138  |
| C | -5.29185552 | 2.26446847  | 3.02202117  |
| C | -4.57890404 | 1.27455410  | 2.32266821  |
| C | -0.28192932 | -4.57922235 | 2.22660195  |
| C | -1.52604292 | -4.19490214 | 1.39377398  |
| C | -2.77700126 | -4.96717687 | 1.89872691  |
| C | -2.55207467 | 1.44362191  | 3.90545202  |
| C | -3.37446969 | 0.55966376  | 2.94111289  |
| C | -3.82456166 | -0.74332610 | 3.65990982  |
| C | 2.71503047  | 3.40253153  | -1.09841492 |
| C | 2.54680432  | 4.53201382  | -0.24991575 |
| C | 2.25156187  | 5.76608840  | -0.86992743 |
| C | 2.12901299  | 5.87401071  | -2.26176214 |
| C | 2.28077297  | 4.73598213  | -3.07269256 |
| C | 2.56618610  | 3.47613136  | -2.51318809 |
| C | 1.17754027  | 4.75861905  | 1.87426356  |
| C | 2.58216575  | 4.46437964  | 1.28325855  |
| C | 3.65617856  | 5.41259810  | 1.87695287  |
| C | 3.15969268  | -3.75492071 | -2.09571758 |
| C | 3.79942038  | -2.56586473 | -1.34505447 |
| C | 5.19642315  | -2.23446811 | -1.94296789 |
| C | 3.85221595  | -1.69359852 | 1.08115825  |
| C | 3.91406656  | -2.78590402 | 0.16671962  |
| C | 4.17670783  | -4.06319601 | 0.69615946  |
| C | 4.35646984  | -4.25515163 | 2.07609699  |
| C | 4.26220274  | -3.16785971 | 2.95563764  |
| C | 4.00422100  | -1.86200707 | 2.48770449  |
| C | 1.91397417  | 2.24946681  | -4.68086271 |
| C | 2.78146730  | 2.24546259  | -3.40115516 |
| C | 4.28480593  | 2.10350968  | -3.77190711 |
| C | 2.66962389  | -1.04563088 | 4.49426429  |
| C | 3.82861408  | -0.73251722 | 3.51153773  |
| C | 5.15040876  | -0.44930248 | 4.27443315  |
| H | -4.51500980 | -2.90401795 | -1.45610797 |
| H | -5.85901446 | -1.37727683 | -0.11592508 |
| H | 4.92421731  | 2.67330297  | 0.11599933  |
| H | 5.42179499  | 0.43804261  | 1.14064532  |
| H | -0.84214588 | -4.85417471 | -3.96727225 |
| H | 0.11708985  | -6.51113229 | -2.39080831 |
| H | -0.13556301 | -6.18625773 | 0.06281383  |
| H | -2.75894335 | -1.78619461 | -2.92379743 |
| H | -5.89018433 | 0.59247330  | -1.50736478 |

|   |             |             |             |
|---|-------------|-------------|-------------|
| H | -0.45526356 | -2.65322907 | -4.75343571 |
| H | -0.33097415 | -1.48800682 | -3.41179781 |
| H | -1.35637546 | -1.12645230 | -4.82965560 |
| H | -2.74688022 | -3.97471254 | -5.08594877 |
| H | -3.55420855 | -2.39982629 | -5.19483720 |
| H | -4.10876333 | -3.61045805 | -4.01241160 |
| H | -7.19795271 | 3.36964582  | -1.53963955 |
| H | -6.77289648 | 2.37960223  | -2.94829225 |
| H | -5.49404695 | 3.02383579  | -1.89403952 |
| H | -8.05707885 | -0.24487112 | -0.53993794 |
| H | -8.28899126 | 0.48399626  | -2.14758261 |
| H | -8.74711699 | 1.37874927  | -0.68443585 |
| H | -7.64745693 | 3.08707321  | 0.69544551  |
| H | -6.94657240 | 3.66400760  | 3.00092675  |
| H | -4.97014921 | 2.54835588  | 4.01984482  |
| H | -1.71421155 | -3.12446048 | 1.54407458  |
| H | -2.71500575 | 0.25960830  | 2.11777824  |
| H | -0.08578506 | -5.66042001 | 2.20231540  |
| H | -0.43784056 | -4.29768250 | 3.27648994  |
| H | 0.61281413  | -4.05676366 | 1.86759078  |
| H | -2.64417167 | -6.05060557 | 1.77068263  |
| H | -3.67959669 | -4.67067712 | 1.34936722  |
| H | -2.94768139 | -4.76701326 | 2.96539636  |
| H | -2.28415310 | 2.40227355  | 3.44414191  |
| H | -1.61524926 | 0.93215520  | 4.15481656  |
| H | -3.09093365 | 1.64695817  | 4.84218201  |
| H | -4.50206667 | -0.51595597 | 4.49514963  |
| H | -2.94967838 | -1.27271385 | 4.05963749  |
| H | -4.34452648 | -1.42174348 | 2.97224381  |
| H | 2.10612176  | 6.64703554  | -0.25033480 |
| H | 1.90620469  | 6.83702631  | -2.71458497 |
| H | 2.17215219  | 4.82901252  | -4.14869142 |
| H | 2.83142069  | 3.44652778  | 1.60052994  |
| H | 3.14249068  | -1.70617585 | -1.52091689 |
| H | 0.83491093  | 5.76817913  | 1.61029824  |
| H | 1.20916417  | 4.68559009  | 2.96910923  |
| H | 0.45148568  | 4.02685700  | 1.50563973  |
| H | 4.65974898  | 5.18617198  | 1.49056717  |
| H | 3.67925631  | 5.31670674  | 2.97014972  |
| H | 3.44070696  | 6.46250116  | 1.64110496  |
| H | 3.80155989  | -4.64698024 | -2.08788187 |
| H | 2.99597014  | -3.47576916 | -3.14406083 |
| H | 2.18536149  | -4.01750463 | -1.66940175 |
| H | 5.64779479  | -1.35221590 | -1.46852679 |
| H | 5.10899258  | -2.03231550 | -3.01863679 |
| H | 5.88797607  | -3.07747696 | -1.80903427 |
| H | 4.23714535  | -4.91420866 | 0.02545467  |
| H | 4.55650781  | -5.25102650 | 2.46406078  |
| H | 4.37110041  | -3.33420806 | 4.02400176  |
| H | 2.49239670  | 1.35198793  | -2.83351384 |
| H | 3.53499664  | 0.18606053  | 2.99283291  |
| H | 2.22497375  | 3.02775066  | -5.39067577 |



|   |             |             |             |
|---|-------------|-------------|-------------|
| H | 0.85383235  | 2.39992307  | -4.44508339 |
| H | 2.00915496  | 1.28209859  | -5.18875929 |
| H | 4.44323049  | 1.19806473  | -4.37184475 |
| H | 4.92135314  | 2.03293486  | -2.87989751 |
| H | 4.62454653  | 2.96746687  | -4.35876420 |
| H | 1.73608984  | -1.17905237 | 3.93857033  |
| H | 2.53586057  | -0.20793999 | 5.19181271  |
| H | 2.87099056  | -1.94804118 | 5.08657526  |
| H | 5.97219214  | -0.19064831 | 3.59142874  |
| H | 5.46953509  | -1.32516532 | 4.85393311  |
| H | 5.01242942  | 0.38327241  | 4.97663280  |
| O | 1.00050357  | -0.50230246 | -1.68595638 |
| O | 0.71087788  | 1.04988931  | 1.98146325  |
| O | 0.80772717  | -0.44167752 | 1.72019823  |
| C | -0.91802609 | 2.31617916  | -1.67336414 |
| H | -0.65755371 | 1.44601627  | -2.27019495 |
| H | -0.44581234 | 3.26473252  | -1.91997070 |
| C | -1.82278967 | 2.22481654  | -0.63078834 |
| H | -2.32946131 | 1.27784366  | -0.44933706 |
| C | -2.34311703 | 3.41827972  | 0.12895221  |
| H | -1.74976291 | 4.31705787  | -0.07532476 |
| H | -3.39000826 | 3.61563160  | -0.14468141 |
| H | -2.32191659 | 3.21477120  | 1.20415949  |

Oxo  $\eta^3$ -Ozone Complex to Oxo Peroxo Complex (conformation 2 higher energy)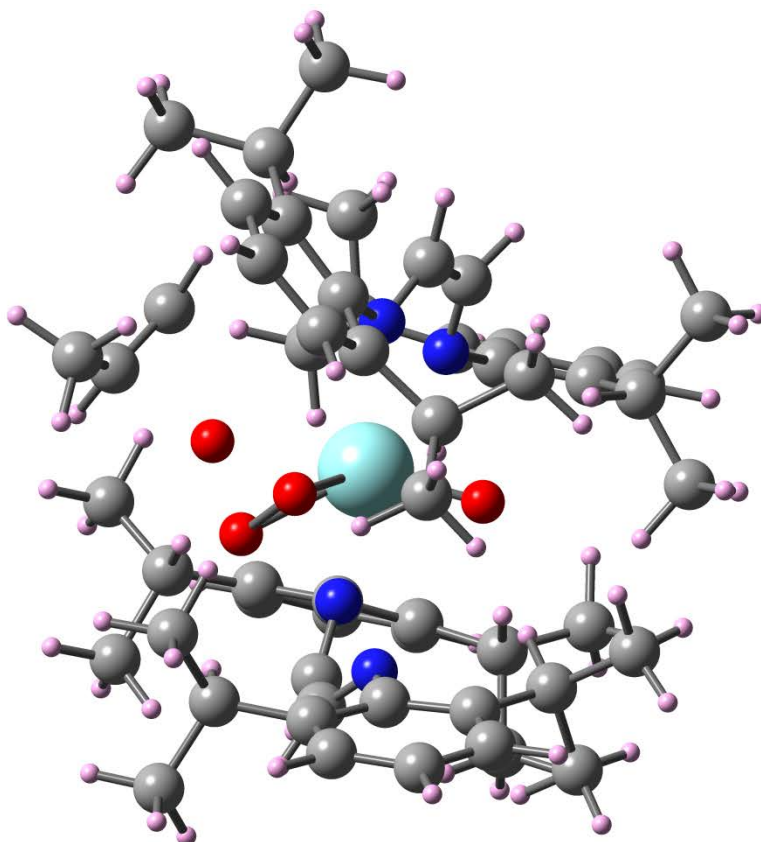Fig. S45: NCCN Oxo  $\eta^3$ -Ozone Complex to Oxo Peroxo Complex (conformation 2 higher energy)

| SCF            | $E_{ZP}$     | H            | G            | imag freq<br>( $\text{cm}^{-1}$ ) |
|----------------|--------------|--------------|--------------|-----------------------------------|
| -2708.87386484 | -2707.646249 | -2707.572297 | -2707.754730 | -434                              |

|   |             |             |             |
|---|-------------|-------------|-------------|
| O | 2.02158200  | 0.31223800  | 0.86322200  |
| N | -1.66249700 | 1.50653100  | -1.23161100 |
| N | 0.98862400  | 2.45430700  | -0.87194800 |
| N | 1.63063800  | -2.61318300 | 0.38858300  |
| N | -1.14471600 | -1.76769900 | 1.17311000  |
| C | -1.19550100 | 2.54154300  | -1.87437800 |
| C | 0.13193800  | 3.08330100  | -1.62492200 |
| C | 0.99645700  | -3.03050200 | 1.43333600  |
| C | -0.43126700 | -2.75286000 | 1.64694000  |
| C | -2.95162100 | 1.02678400  | -1.73260300 |
| C | -3.01970100 | 0.44974900  | -3.03439300 |
| C | -4.29762700 | 0.08442400  | -3.51192500 |
| C | -5.45332000 | 0.28233500  | -2.74420400 |
| C | -5.35726800 | 0.86322400  | -1.46948400 |
| C | -4.11162000 | 1.25714600  | -0.94286300 |

|   |             |             |             |
|---|-------------|-------------|-------------|
| C | -1.65533000 | -1.25287900 | -4.37021300 |
| C | -1.79817400 | 0.22788600  | -3.93930700 |
| C | -1.85833900 | 1.15150900  | -5.18673600 |
| C | 4.60364400  | 0.14526500  | -1.55677200 |
| C | 3.38846000  | 1.07304800  | -1.76204600 |
| C | 3.23710400  | 1.43030900  | -3.26941500 |
| C | 2.26800700  | 3.08981800  | -0.61420400 |
| C | 3.45114000  | 2.35942000  | -0.93698200 |
| C | 4.69439800  | 2.93072000  | -0.61038000 |
| C | 4.78126200  | 4.19170300  | -0.00198300 |
| C | 3.61438400  | 4.92283200  | 0.25092100  |
| C | 2.33600100  | 4.41003500  | -0.05832800 |
| C | -5.12910600 | 1.65845900  | 1.38917800  |
| C | -4.02381100 | 2.03047300  | 0.37595100  |
| C | -4.06829600 | 3.56193800  | 0.10293300  |
| C | 1.16158700  | 6.05980500  | 1.55400000  |
| C | 1.12785600  | 5.33315200  | 0.18436600  |
| C | 1.02851500  | 6.40591300  | -0.94012000 |
| C | 2.97876200  | -2.95237200 | 0.10198200  |
| C | 4.03208000  | -2.86664900 | 1.06586100  |
| C | 5.32053400  | -3.27339300 | 0.65947800  |
| C | 5.56984300  | -3.74224000 | -0.63909300 |
| C | 4.53228200  | -3.76849100 | -1.58751900 |
| C | 3.23175300  | -3.35500000 | -1.24791000 |
| C | 4.76652900  | -1.04444100 | 2.68803500  |
| C | 3.85513000  | -2.28148400 | 2.47464700  |
| C | 4.10798100  | -3.35204700 | 3.56935700  |
| C | -3.72624200 | -3.25030200 | -1.99303500 |
| C | -2.75211000 | -3.20858700 | -0.79272800 |
| C | -2.25455300 | -4.65624500 | -0.50934200 |
| C | -2.58605800 | -1.91938800 | 1.44392100  |
| C | -3.37365700 | -2.60289700 | 0.47372300  |
| C | -4.74036200 | -2.80484600 | 0.75726700  |
| C | -5.30219300 | -2.38082400 | 1.97050300  |
| C | -4.49737600 | -1.74592400 | 2.92640700  |
| C | -3.12658500 | -1.49857200 | 2.69106500  |
| C | 2.53656800  | -3.07282300 | -3.70761000 |
| C | 2.08617900  | -3.38624700 | -2.26256400 |
| C | 1.36461800  | -4.76220300 | -2.21814100 |
| C | -3.00341600 | 0.25518000  | 4.56163800  |
| C | -2.26747300 | -0.87524400 | 3.80056400  |
| C | -1.81802700 | -1.95933900 | 4.82143400  |
| H | -1.78292700 | 3.02294800  | -2.65810300 |
| H | 0.38764800  | 4.00848600  | -2.13978500 |
| H | 1.43657100  | -3.71462300 | 2.17008200  |
| H | -0.93173400 | -3.51359100 | 2.25587000  |
| H | -4.38280100 | -0.36165800 | -4.49936500 |
| H | -6.42443700 | -0.00842100 | -3.13774700 |
| H | -6.25842600 | 1.02311900  | -0.88623800 |
| H | -0.88817700 | 0.44186300  | -3.37174500 |
| H | 2.49589100  | 0.50856000  | -1.47753200 |
| H | -2.53693600 | -1.61816200 | -4.91446100 |

|   |             |             |             |
|---|-------------|-------------|-------------|
| H | -1.48520200 | -1.87894700 | -3.49021100 |
| H | -0.78300000 | -1.36042400 | -5.02842600 |
| H | -2.72746700 | 0.91785600  | -5.81631100 |
| H | -0.95612600 | 1.01653200  | -5.79766400 |
| H | -1.92774300 | 2.21365000  | -4.91341400 |
| H | 5.52865600  | 0.57791400  | -1.96353800 |
| H | 4.43373900  | -0.80523000 | -2.07342200 |
| H | 4.75508600  | -0.07950900 | -0.49586700 |
| H | 2.35006200  | 2.05003100  | -3.45460300 |
| H | 3.13099800  | 0.51254700  | -3.86157800 |
| H | 4.11807300  | 1.97789000  | -3.63252500 |
| H | 5.60418900  | 2.38638300  | -0.83786400 |
| H | 5.75210500  | 4.60942400  | 0.25372600  |
| H | 3.69457800  | 5.91056400  | 0.69538100  |
| H | -3.05262500 | 1.80560800  | 0.83588800  |
| H | 0.20780300  | 4.73664800  | 0.16591200  |
| H | -6.11778800 | 1.99725000  | 1.05154200  |
| H | -4.93324900 | 2.15173900  | 2.35034500  |
| H | -5.17205000 | 0.57886100  | 1.56259100  |
| H | -5.02304000 | 3.83979100  | -0.36319000 |
| H | -3.26037500 | 3.88571900  | -0.56413400 |
| H | -3.97225100 | 4.11953200  | 1.04370600  |
| H | 1.28990600  | 5.36102900  | 2.38389400  |
| H | 0.21952100  | 6.60266400  | 1.70786800  |
| H | 1.97238000  | 6.79733800  | 1.60029000  |
| H | 1.90441900  | 7.06657100  | -0.91254800 |
| H | 0.13230300  | 7.02536000  | -0.80069600 |
| H | 0.99006000  | 5.96699400  | -1.94512100 |
| H | 6.14188200  | -3.21422100 | 1.36970500  |
| H | 6.57061700  | -4.06543600 | -0.91719100 |
| H | 4.74166300  | -4.10180200 | -2.59990000 |
| H | 2.83368600  | -1.90890200 | 2.58654300  |
| H | -1.88395100 | -2.60063700 | -1.07874500 |
| H | 5.83059900  | -1.28848700 | 2.56852200  |
| H | 4.62300200  | -0.64774100 | 3.70230800  |
| H | 4.49759200  | -0.25426200 | 1.97898400  |
| H | 3.44430800  | -4.22004600 | 3.45129000  |
| H | 3.93847700  | -2.92411600 | 4.56655900  |
| H | 5.14122000  | -3.72269000 | 3.53409700  |
| H | -4.53993100 | -3.97008300 | -1.82934500 |
| H | -3.18793400 | -3.57130700 | -2.89315900 |
| H | -4.16650400 | -2.26931500 | -2.19220800 |
| H | -1.48853400 | -4.69041300 | 0.27329000  |
| H | -1.81904700 | -5.08883600 | -1.41887000 |
| H | -3.09057400 | -5.29368200 | -0.19085600 |
| H | -5.36582500 | -3.31102200 | 0.02887400  |
| H | -6.35605100 | -2.55570700 | 2.17457500  |
| H | -4.93709400 | -1.44097900 | 3.87137800  |
| H | 1.36591100  | -2.61398600 | -1.96348800 |
| H | -1.37322400 | -0.43385300 | 3.34648600  |
| H | 3.17147700  | -3.86367300 | -4.13174800 |
| H | 3.08807000  | -2.12532000 | -3.75769200 |

|    |             |             |             |
|----|-------------|-------------|-------------|
| H  | 1.65265700  | -2.97920100 | -4.35222000 |
| H  | 0.51366400  | -4.76902900 | -2.91335700 |
| H  | 0.98282900  | -4.98122800 | -1.21338600 |
| H  | 2.04801800  | -5.57361500 | -2.50661100 |
| H  | -3.35199000 | 1.03837700  | 3.87927100  |
| H  | -2.32486300 | 0.71321500  | 5.29214700  |
| H  | -3.86982900 | -0.11974000 | 5.12221400  |
| H  | -1.21636500 | -2.74641900 | 4.35191100  |
| H  | -2.68738900 | -2.43872500 | 5.29212500  |
| H  | -1.20829200 | -1.50317900 | 5.61260200  |
| O  | 0.14073100  | -0.63070600 | -1.56473500 |
| O  | 1.13983000  | -0.20096000 | 1.96371600  |
| O  | -0.01675800 | 1.13758800  | 2.26200600  |
| Zr | 0.07412500  | 0.21198300  | 0.07212300  |
| C  | -0.31246400 | 2.50523700  | 3.51653100  |
| H  | -0.73869200 | 1.90009700  | 4.31476800  |
| C  | -1.20485500 | 3.10448800  | 2.63822000  |
| H  | -2.26281100 | 2.86608300  | 2.66873700  |
| H  | -0.87026000 | 3.81042200  | 1.88386400  |
| C  | 1.11298400  | 2.95059700  | 3.75773900  |
| H  | 1.14993200  | 3.76103900  | 4.50238500  |
| H  | 1.70567200  | 2.10819400  | 4.12915300  |
| H  | 1.57998500  | 3.29064900  | 2.82966200  |

## 5. NCCNO Single Ground States

### 5.1 Structures with two oxygen atoms

#### Bare Complex

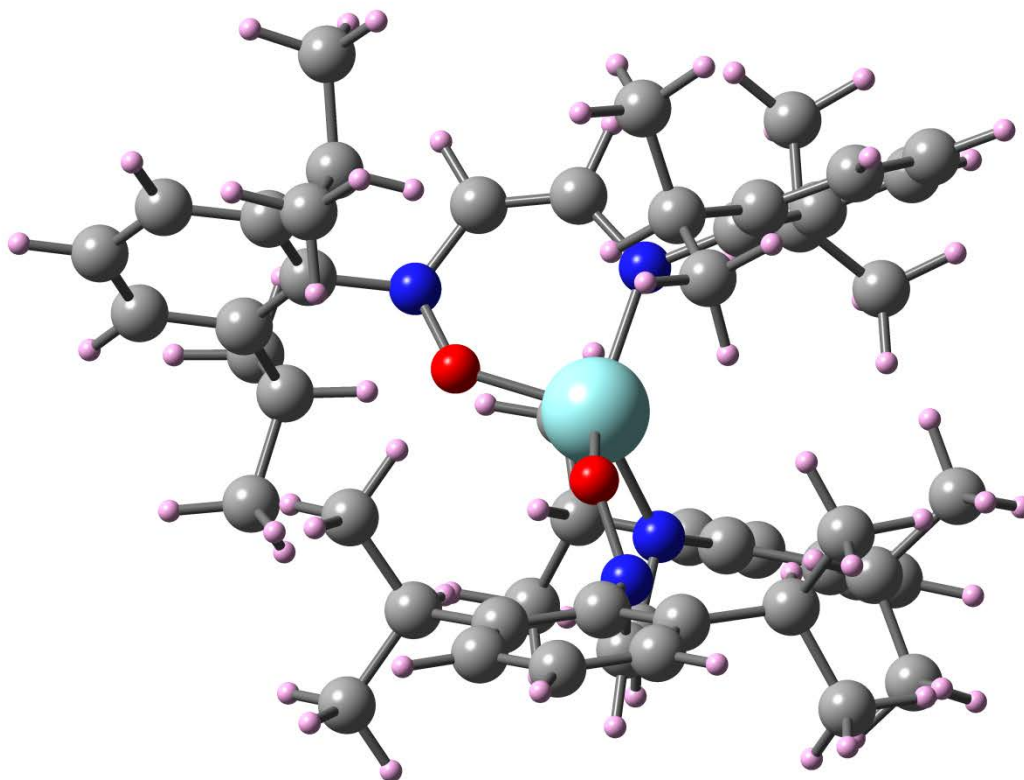

Fig. S46: NCCNO Bare Complex

| SCF           | E <sub>ZP</sub> | H            | G            |
|---------------|-----------------|--------------|--------------|
| -2440.6540158 | -2439.514239    | -2439.447419 | -2439.621007 |

|    |             |             |             |
|----|-------------|-------------|-------------|
| Zr | 0.05429200  | -0.11155300 | -0.01368400 |
| O  | -1.13919000 | 1.51880000  | -0.04615700 |
| O  | 1.94553900  | 0.50997500  | -0.15696700 |
| N  | 0.60899500  | -1.33292500 | 1.58871000  |
| N  | 3.19667800  | -0.06356200 | 0.28972300  |
| N  | -0.93688600 | -0.93175000 | -1.65036500 |
| N  | -2.20756300 | 1.82349300  | -0.96469600 |
| C  | 1.98130500  | -1.49626900 | 1.95593500  |
| C  | 3.09182300  | -0.92442300 | 1.40267300  |
| C  | -1.55236600 | 0.01185400  | -2.54794300 |
| C  | -2.12183700 | 1.21207100  | -2.22926000 |
| C  | -0.35838200 | -1.86982400 | 2.53428600  |
| C  | -1.03736400 | -0.98085200 | 3.42309300  |

|   |             |             |             |
|---|-------------|-------------|-------------|
| C | -2.00443700 | -1.51244600 | 4.30361300  |
| C | -2.27957600 | -2.88661800 | 4.33591300  |
| C | -1.57385100 | -3.75700300 | 3.49075100  |
| C | -0.60902700 | -3.27574000 | 2.58175700  |
| C | -1.92996500 | 1.43186800  | 3.42673600  |
| C | -0.68988200 | 0.51075100  | 3.52529200  |
| C | 0.10335800  | 0.78569600  | 4.83196900  |
| C | 3.09334000  | 3.45654300  | 2.43750600  |
| C | 3.69130800  | 2.02583400  | 2.39661900  |
| C | 4.46524300  | 1.71626300  | 3.70483700  |
| C | 4.30437900  | 0.86450900  | 0.15298100  |
| C | 4.57648400  | 1.83467500  | 1.15937200  |
| C | 5.69970900  | 2.67112000  | 0.98869900  |
| C | 6.50931700  | 2.57558500  | -0.15347400 |
| C | 6.20058400  | 1.64343700  | -1.15552600 |
| C | 5.09601300  | 0.77624500  | -1.02395600 |
| C | -0.75296200 | -5.24009100 | 0.93840200  |
| C | 0.17129800  | -4.27540200 | 1.72123700  |
| C | 1.16960900  | -5.08824300 | 2.59201500  |
| C | 4.39170900  | 0.53853200  | -3.44896600 |
| C | 4.76965500  | -0.21101000 | -2.14403100 |
| C | 5.93275200  | -1.20553500 | -2.39246900 |
| C | -1.18624400 | -2.31725600 | -2.01755200 |
| C | -2.49174400 | -2.86689000 | -1.82156200 |
| C | -2.74111700 | -4.18978000 | -2.23957500 |
| C | -1.73369500 | -4.97039800 | -2.82718200 |
| C | -0.45331600 | -4.42836900 | -3.00079200 |
| C | -0.15599200 | -3.10343900 | -2.61158100 |
| C | -4.14918300 | -2.75382500 | 0.11880900  |
| C | -3.63055900 | -2.06997900 | -1.17397700 |
| C | -4.79378400 | -1.83858900 | -2.17389700 |
| C | 0.53541000  | 4.66038300  | -0.64620000 |
| C | -0.48920000 | 4.13782000  | -1.68675800 |
| C | -0.29892200 | 4.84243700  | -3.05467500 |
| C | -2.72117000 | 3.16645800  | -0.80559000 |
| C | -1.91834500 | 4.28759400  | -1.15767800 |
| C | -2.46898500 | 5.57534000  | -0.99489600 |
| C | -3.77491900 | 5.74801100  | -0.50858400 |
| C | -4.55284500 | 4.63112400  | -0.16889800 |
| C | -4.03993900 | 3.32248200  | -0.29945700 |
| C | 2.32635300  | -3.37907200 | -2.10783800 |
| C | 1.25260200  | -2.56263600 | -2.87426800 |
| C | 1.56790700  | -2.53020800 | -4.39332500 |
| C | -5.49048000 | 2.24014400  | 1.50507300  |
| C | -4.91358000 | 2.12211300  | 0.07148100  |
| C | -6.05448100 | 1.92946300  | -0.96323600 |
| H | 2.15983600  | -2.16453000 | 2.79484600  |
| H | 4.05949300  | -1.18072400 | 1.82049500  |
| H | -1.61056500 | -0.29711000 | -3.59031000 |
| H | -2.61375100 | 1.77568100  | -3.01645000 |
| H | -2.53442400 | -0.84635100 | 4.97988300  |
| H | -3.02685100 | -3.27821800 | 5.02216200  |

|   |             |             |             |
|---|-------------|-------------|-------------|
| H | -1.77671900 | -4.82417000 | 3.53619700  |
| H | -0.01864400 | 0.77327800  | 2.69648400  |
| H | 2.85243700  | 1.32659200  | 2.34006400  |
| H | -2.63349900 | 1.25049200  | 4.24968900  |
| H | -2.45854400 | 1.28213300  | 2.47889600  |
| H | -1.62360000 | 2.48486300  | 3.47386100  |
| H | -0.50750500 | 0.56197800  | 5.71657800  |
| H | 0.40175300  | 1.84164800  | 4.88351100  |
| H | 1.00847800  | 0.16766300  | 4.88044300  |
| H | 3.87664500  | 4.21941200  | 2.53613200  |
| H | 2.41669300  | 3.55921300  | 3.29692400  |
| H | 2.52537000  | 3.67013900  | 1.52478800  |
| H | 4.85359000  | 0.69000000  | 3.70507600  |
| H | 3.80462600  | 1.83059600  | 4.57465000  |
| H | 5.31586100  | 2.39775300  | 3.83686000  |
| H | 5.93491100  | 3.41156300  | 1.74944800  |
| H | 7.36941800  | 3.23180000  | -0.26630200 |
| H | 6.82202300  | 1.58740100  | -2.04593300 |
| H | 0.75295800  | -3.70699200 | 0.98792700  |
| H | 3.89656300  | -0.78642800 | -1.82290800 |
| H | -1.33743200 | -5.87901000 | 1.61396700  |
| H | -0.15278000 | -5.89833000 | 0.29675200  |
| H | -1.45021900 | -4.69433800 | 0.29502500  |
| H | 0.63650300  | -5.70535000 | 3.32785600  |
| H | 1.85755100  | -4.43357900 | 3.14112700  |
| H | 1.76806400  | -5.75784900 | 1.95984700  |
| H | 3.54558800  | 1.21577700  | -3.27966500 |
| H | 4.10735500  | -0.17747400 | -4.23193600 |
| H | 5.23315800  | 1.13329700  | -3.82933500 |
| H | 6.84293400  | -0.68835400 | -2.72404700 |
| H | 5.65739600  | -1.92741100 | -3.17335600 |
| H | 6.17709600  | -1.76522200 | -1.48055900 |
| H | -3.73273600 | -4.61400500 | -2.09969700 |
| H | -1.94462100 | -5.98946800 | -3.14295100 |
| H | 0.32517900  | -5.03518000 | -3.45788100 |
| H | -3.24302700 | -1.08681900 | -0.89168400 |
| H | -0.28228200 | 3.07396900  | -1.83438300 |
| H | -4.57760900 | -3.74280000 | -0.09219300 |
| H | -4.93589000 | -2.14180900 | 0.58088500  |
| H | -3.34616000 | -2.88525400 | 0.85466100  |
| H | -4.44009000 | -1.32060600 | -3.07354200 |
| H | -5.57914100 | -1.22503600 | -1.71260900 |
| H | -5.24796900 | -2.78889300 | -2.48505500 |
| H | 0.40251800  | 5.73506100  | -0.46102600 |
| H | 1.56031000  | 4.50018200  | -1.00619700 |
| H | 0.41745000  | 4.12989300  | 0.30548700  |
| H | -1.00927300 | 4.46423800  | -3.80122900 |
| H | 0.71760400  | 4.66513100  | -3.43024000 |
| H | -0.43954400 | 5.92850100  | -2.97647200 |
| H | -1.87519800 | 6.44834000  | -1.25470300 |
| H | -4.18378000 | 6.74969400  | -0.39539500 |
| H | -5.56261700 | 4.77663200  | 0.20694700  |



|   |             |             |             |
|---|-------------|-------------|-------------|
| H | 1.29409800  | -1.52785700 | -2.51546800 |
| H | -4.27652100 | 1.23187800  | 0.03621200  |
| H | 2.32035900  | -4.43263600 | -2.41660900 |
| H | 2.15579900  | -3.34498100 | -1.02424500 |
| H | 3.32876700  | -2.97879000 | -2.30434600 |
| H | 2.55739000  | -2.08713100 | -4.56872400 |
| H | 0.82544100  | -1.93399000 | -4.93892100 |
| H | 1.57054500  | -3.54011100 | -4.82463600 |
| H | -4.69214500 | 2.38427600  | 2.24298500  |
| H | -6.03901600 | 1.32559600  | 1.76789400  |
| H | -6.18925800 | 3.08237700  | 1.59490400  |
| H | -5.65274100 | 1.77903200  | -1.97310100 |
| H | -6.71620600 | 2.80570700  | -0.98987300 |
| H | -6.66448800 | 1.05342500  | -0.70414300 |

## 5.2 Structures with three oxygen atoms

## Oxo Complex

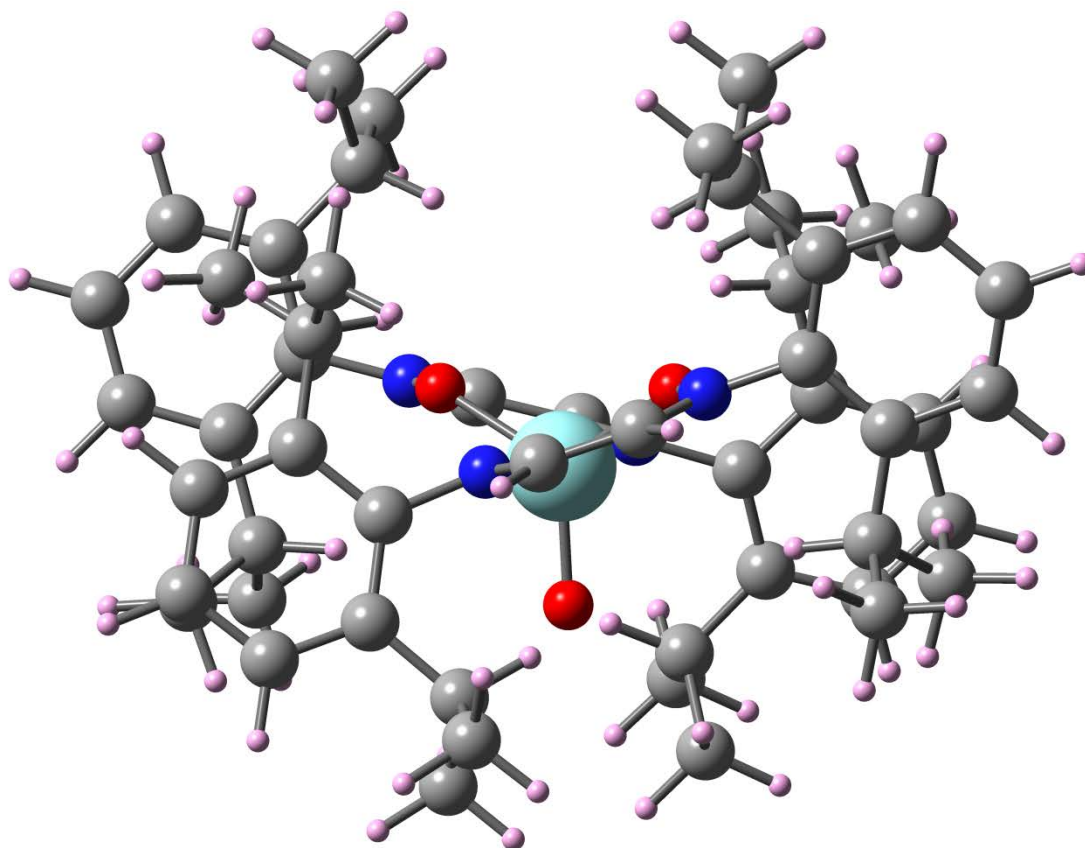

Fig. S47: NCCNO Oxo Complex

| SCF           | $E_{ZP}$     | H            | G            |
|---------------|--------------|--------------|--------------|
| -2515.9011979 | -2514.757357 | -2514.689200 | -2514.864027 |

|    |             |             |             |
|----|-------------|-------------|-------------|
| Zr | -0.00004700 | 0.00007200  | -0.47343900 |
| N  | 0.21232900  | 2.30512400  | -0.33340400 |
| N  | -0.21252000 | -2.30490800 | -0.33351400 |
| C  | -0.84704800 | 3.13907700  | -0.16436000 |
| C  | -2.15587300 | 2.81274300  | 0.22385000  |
| C  | 0.84675600  | -3.13894900 | -0.16398100 |
| C  | 2.15560000  | -2.81276600 | 0.22424500  |
| C  | 1.42512700  | 2.95533600  | -0.81502100 |
| C  | 2.47142800  | 3.21110800  | 0.12051400  |
| C  | 3.63070800  | 3.87210700  | -0.33311300 |
| C  | 3.76039700  | 4.27191500  | -1.67327200 |
| C  | 2.72483900  | 4.01126300  | -2.58053100 |
| C  | 1.53997900  | 3.35515900  | -2.17859900 |
| C  | 3.62614600  | 2.46391500  | 2.29641000  |
| C  | 2.30401700  | 2.86562300  | 1.60413000  |

|   |             |             |             |
|---|-------------|-------------|-------------|
| C | 1.64584800  | 4.05311200  | 2.36163000  |
| C | -3.23676000 | 0.98996100  | 4.58058800  |
| C | -3.30275600 | 1.97197600  | 3.38350300  |
| C | -3.58963800 | 3.41626800  | 3.87532000  |
| C | -4.00092700 | 1.34807100  | 0.97512400  |
| C | -4.33622700 | 1.53513700  | 2.34069300  |
| C | -5.68021900 | 1.32612200  | 2.71504600  |
| C | -6.63972800 | 0.93424600  | 1.76803000  |
| C | -6.27698500 | 0.74683800  | 0.42402000  |
| C | -4.94802600 | 0.94850600  | -0.00319300 |
| C | 0.95086700  | 2.32404700  | -4.43984000 |
| C | 0.43506900  | 3.12338000  | -3.21655500 |
| C | -0.19481000 | 4.47059400  | -3.66399300 |
| C | -5.10029900 | -0.51781200 | -2.09900200 |
| C | -4.57065500 | 0.79812000  | -1.47995200 |
| C | -5.07034300 | 2.02615000  | -2.29026100 |
| C | -1.42516700 | -2.95524600 | -0.81535100 |
| C | -1.53967800 | -3.35504600 | -2.17895200 |
| C | -2.72441600 | -4.01120000 | -2.58119800 |
| C | -3.76015400 | -4.27196800 | -1.67419400 |
| C | -3.63078300 | -3.87222500 | -0.33397900 |
| C | -2.47167900 | -3.21112700 | 0.11993300  |
| C | -0.94979600 | -2.32373900 | -4.43994100 |
| C | -0.43448400 | -3.12334200 | -3.21662300 |
| C | 0.19525100  | -4.47065500 | -3.66398200 |
| C | 3.23720700  | -0.99098700 | 4.58050200  |
| C | 3.30330400  | -1.97285800 | 3.38328700  |
| C | 3.59057800  | -3.41712900 | 3.87492100  |
| C | 4.00093100  | -1.34806500 | 0.97496500  |
| C | 4.33651000  | -1.53559300 | 2.34039000  |
| C | 5.68055800  | -1.32655300 | 2.71456200  |
| C | 6.63982800  | -0.93417200 | 1.76752500  |
| C | 6.27680500  | -0.74630800 | 0.42364600  |
| C | 4.94781000  | -0.94804200 | -0.00339500 |
| C | -3.62714200 | -2.46470500 | 2.29570100  |
| C | -2.30466700 | -2.86551500 | 1.60355100  |
| C | -1.64582900 | -4.05253800 | 2.36123900  |
| C | 5.10000300  | 0.51822700  | -2.09931300 |
| C | 4.57015400  | -0.79752100 | -1.48007300 |
| C | 5.06930300  | -2.02573900 | -2.29045000 |
| H | -0.69638300 | 4.19720800  | -0.38296000 |
| H | -2.89553500 | 3.60327200  | 0.25781200  |
| H | 0.69595400  | -4.19712900 | -0.38225500 |
| H | 2.89509200  | -3.60344100 | 0.25851200  |
| H | 4.43583900  | 4.08195600  | 0.36510400  |
| H | 4.66141400  | 4.78334100  | -2.00476500 |
| H | 2.83189800  | 4.32200900  | -3.61702200 |
| H | 1.62296900  | 2.00895500  | 1.67142500  |
| H | -2.31476800 | 1.97115300  | 2.91031600  |
| H | 4.32693700  | 3.30686900  | 2.36395700  |
| H | 4.12215900  | 1.64319800  | 1.76651200  |
| H | 3.42194900  | 2.13300400  | 3.32320900  |

|   |             |             |             |
|---|-------------|-------------|-------------|
| H | 2.28457200  | 4.94561700  | 2.31172600  |
| H | 1.49757500  | 3.79836100  | 3.42024800  |
| H | 0.66958900  | 4.31046800  | 1.93406300  |
| H | -4.18377700 | 0.96039800  | 5.13545200  |
| H | -2.45051700 | 1.30277300  | 5.28037300  |
| H | -3.00928800 | -0.02716500 | 4.24182600  |
| H | -3.58751000 | 4.13063400  | 3.04227400  |
| H | -2.82497900 | 3.73264900  | 4.59690100  |
| H | -4.56809800 | 3.47946800  | 4.36966600  |
| H | -5.97648900 | 1.46514900  | 3.75175700  |
| H | -7.67029700 | 0.77480500  | 2.07694900  |
| H | -7.03136200 | 0.44330100  | -0.29666600 |
| H | -0.34670400 | 2.50854800  | -2.76356300 |
| H | -3.47829500 | 0.77275800  | -1.55764000 |
| H | 1.77056500  | 2.84190500  | -4.95689600 |
| H | 0.13555100  | 2.18037500  | -5.16185800 |
| H | 1.28924100  | 1.33339300  | -4.12108200 |
| H | 0.54482800  | 5.11113900  | -4.16339200 |
| H | -0.59916700 | 5.03275800  | -2.81135700 |
| H | -1.01465900 | 4.28907400  | -4.37209000 |
| H | -4.75211200 | -1.39125600 | -1.53734800 |
| H | -4.73696300 | -0.61514200 | -3.12991500 |
| H | -6.19797100 | -0.54088700 | -2.13103000 |
| H | -6.16568100 | 2.10059700  | -2.25656900 |
| H | -4.76670200 | 1.93469300  | -3.34112200 |
| H | -4.65527500 | 2.96312400  | -1.89720900 |
| H | -2.83121900 | -4.32188300 | -3.61773300 |
| H | -4.66106300 | -4.78344200 | -2.00590600 |
| H | -4.43604300 | -4.08217900 | 0.36405400  |
| H | 0.34732700  | -2.50875500 | -2.76335900 |
| H | 2.31525000  | -1.97223000 | 2.91024200  |
| H | -1.76961600 | -2.84124200 | -4.95714700 |
| H | -0.13431900 | -2.18037500 | -5.16184300 |
| H | -1.28779700 | -1.33299000 | -4.12108700 |
| H | 0.59922400  | -5.03296500 | -2.81126200 |
| H | 1.01534700  | -4.28928500 | -4.37183500 |
| H | -0.54438200 | -5.11100700 | -4.16363900 |
| H | 4.18432100  | -0.96120500 | 5.13518800  |
| H | 2.45118800  | -1.30413100 | 5.28039100  |
| H | 3.00936100  | 0.02611000  | 4.24191300  |
| H | 3.58844800  | -4.13143800 | 3.04182600  |
| H | 2.82612700  | -3.73373500 | 4.59662600  |
| H | 4.56914200  | -3.48017100 | 4.36907600  |
| H | 5.97703200  | -1.46594200 | 3.75116700  |
| H | 7.67043800  | -0.77471700 | 2.07630200  |
| H | 7.03101500  | -0.44243700 | -0.29707100 |
| H | -1.62419400 | -2.00839600 | 1.67087900  |
| H | 3.47778800  | -0.77185600 | -1.55750400 |
| H | -4.32722700 | -3.30823600 | 2.36341900  |
| H | -4.12386100 | -1.64452200 | 1.76562800  |
| H | -3.42324400 | -2.13339000 | 3.32242200  |
| H | -1.49793100 | -3.79761200 | 3.41986500  |

|   |             |             |             |
|---|-------------|-------------|-------------|
| H | -0.66931600 | -4.30926700 | 1.93388200  |
| H | -2.28396800 | -4.94545800 | 2.31125400  |
| H | 4.75215600  | 1.39180200  | -1.53764000 |
| H | 4.73646600  | 0.61558000  | -3.13015200 |
| H | 6.19767400  | 0.54103300  | -2.13160100 |
| H | 4.65403100  | -2.96256300 | -1.89725800 |
| H | 6.16462600  | -2.10050700 | -2.25698000 |
| H | 4.76546600  | -1.93423900 | -3.34125000 |
| O | -0.00062100 | 0.00042000  | -2.29356100 |
| O | 1.79829000  | -0.47432100 | 0.54722600  |
| O | -1.79817800 | 0.47441300  | 0.54765400  |
| N | 2.63336000  | -1.58229500 | 0.56040600  |
| N | -2.63338400 | 1.58229800  | 0.56045400  |

### 5.3 Structures with four oxygen atoms

#### Dioxo Complex (lower energy conformation)

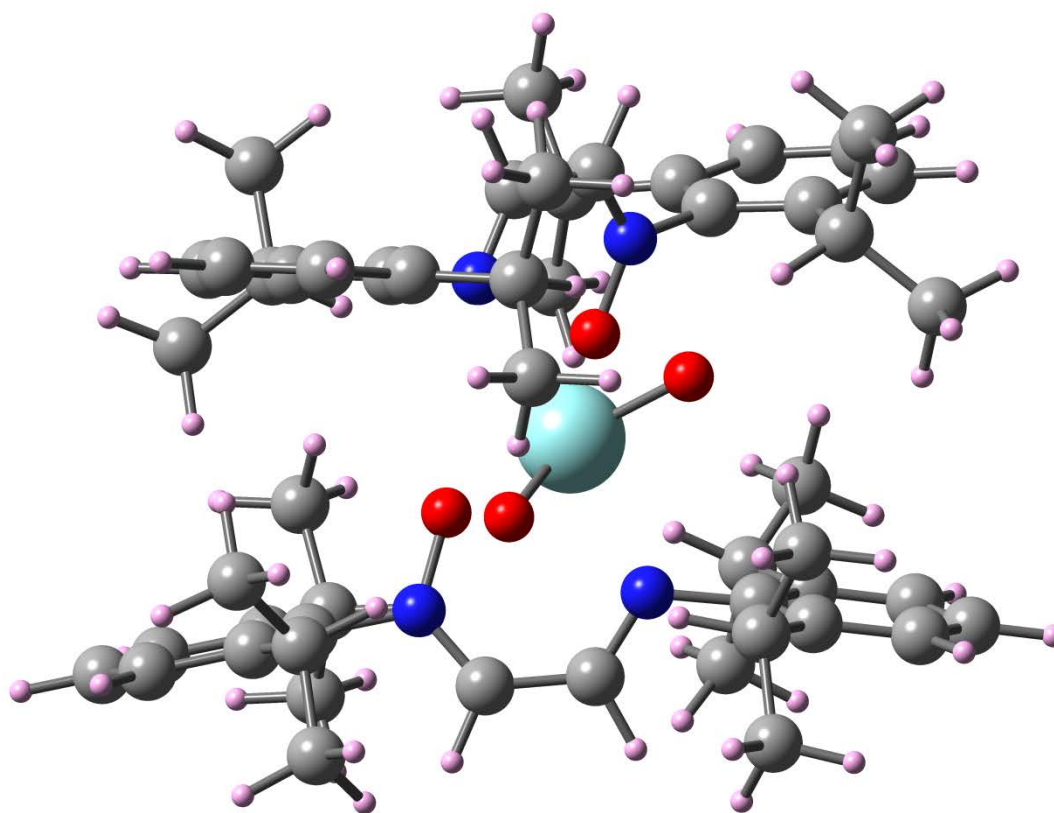

Fig. S48: NCCNO Dioxo Complex (lower energy conformation)

| SCF           | $E_{ZP}$     | H            | G            |
|---------------|--------------|--------------|--------------|
| -2591.0884943 | -2589.940153 | -2589.870749 | -2590.046750 |

|    |             |             |             |
|----|-------------|-------------|-------------|
| Zr | -0.00255200 | 0.15159300  | 0.92558000  |
| N  | -0.58162400 | 2.42042800  | 0.26000300  |
| N  | 0.58320800  | -2.20818000 | 1.00943100  |
| C  | 0.30580900  | 3.26773600  | -0.18828800 |
| C  | 1.62371100  | 2.95094600  | -0.69567200 |
| C  | -0.30218900 | -3.15597300 | 0.85463100  |
| C  | -1.62271000 | -3.01862300 | 0.27808000  |
| C  | -1.87448100 | 2.98472400  | 0.65356700  |
| C  | -2.89731600 | 3.06145800  | -0.33012400 |
| C  | -4.12712500 | 3.63699700  | 0.04843800  |
| C  | -4.33493600 | 4.10411700  | 1.35660900  |
| C  | -3.31443600 | 3.99072400  | 2.31153500  |
| C  | -2.06167900 | 3.42484100  | 1.98833600  |
| C  | -3.88663300 | 1.80946000  | -2.34440100 |
| C  | -2.67040800 | 2.57274400  | -1.76680200 |

|   |             |             |             |
|---|-------------|-------------|-------------|
| C | -2.29404400 | 3.75620100  | -2.70109800 |
| C | 2.03861400  | 0.12720200  | -4.55809000 |
| C | 2.32306800  | 1.54867000  | -4.00184300 |
| C | 2.50133800  | 2.57190200  | -5.15136900 |
| C | 3.40515500  | 1.60811100  | -1.65096300 |
| C | 3.53025500  | 1.51941200  | -3.05883000 |
| C | 4.83430000  | 1.37044100  | -3.57254700 |
| C | 5.94494100  | 1.31545500  | -2.71373600 |
| C | 5.77469600  | 1.39690800  | -1.32327600 |
| C | 4.49215600  | 1.53553400  | -0.74590900 |
| C | -1.47157200 | 2.39351500  | 4.22993200  |
| C | -0.98268100 | 3.29994900  | 3.06959900  |
| C | -0.53868900 | 4.69452400  | 3.58429900  |
| C | 5.12728900  | 0.51740600  | 1.51156200  |
| C | 4.32295000  | 1.61749500  | 0.77595700  |
| C | 4.74271500  | 3.02099100  | 1.29251000  |
| C | 1.88071900  | -2.61701800 | 1.55167200  |
| C | 2.08253300  | -2.59898700 | 2.95515800  |
| C | 3.33492900  | -3.04380300 | 3.43224300  |
| C | 4.34193300  | -3.47360000 | 2.55621400  |
| C | 4.12188700  | -3.45229100 | 1.16930300  |
| C | 2.89143800  | -3.01732900 | 0.63620900  |
| C | 1.52920700  | -0.90120800 | 4.75969700  |
| C | 1.01726600  | -2.12008600 | 3.94788200  |
| C | 0.56089200  | -3.27431900 | 4.87899200  |
| C | -2.07202700 | -1.55741400 | -4.30255200 |
| C | -2.32410200 | -2.72054900 | -3.30581500 |
| C | -2.48104400 | -4.06920600 | -4.05270100 |
| C | -3.40820700 | -2.05177800 | -1.05155000 |
| C | -3.53204400 | -2.40801800 | -2.41652400 |
| C | -4.83651900 | -2.43657900 | -2.94981800 |
| C | -5.94857700 | -2.12449200 | -2.15004500 |
| C | -5.77957400 | -1.76469900 | -0.80424800 |
| C | -4.49690200 | -1.70685300 | -0.21353700 |
| C | 3.87133000  | -2.49438300 | -1.68042200 |
| C | 2.65278900  | -3.01322100 | -0.87953100 |
| C | 2.24905800  | -4.42764300 | -1.38106900 |
| C | -5.13839500 | -0.03078400 | 1.60679900  |
| C | -4.32910200 | -1.30359600 | 1.25629800  |
| C | -4.74489300 | -2.47315600 | 2.19013300  |
| H | 0.07813700  | 4.33798300  | -0.18674300 |
| H | 2.32917100  | 3.76237400  | -0.82042900 |
| H | -0.07033100 | -4.17055900 | 1.19231700  |
| H | -2.32623300 | -3.82901600 | 0.41965000  |
| H | -4.92845600 | 3.71606700  | -0.68122100 |
| H | -5.29064100 | 4.54527500  | 1.63035100  |
| H | -3.48911500 | 4.33834100  | 3.32649500  |
| H | -1.82874200 | 1.86916800  | -1.75664700 |
| H | 1.43512700  | 1.84733900  | -3.43244200 |
| H | -4.75654500 | 2.46580000  | -2.47849300 |
| H | -4.18091100 | 0.97856400  | -1.69413000 |
| H | -3.63404000 | 1.39546000  | -3.32966900 |

|   |             |             |             |
|---|-------------|-------------|-------------|
| H | -3.10562300 | 4.49516500  | -2.73470900 |
| H | -2.11611400 | 3.39832000  | -3.72454300 |
| H | -1.38860600 | 4.27425600  | -2.35904100 |
| H | 2.88968000  | -0.24440300 | -5.14437500 |
| H | 1.15618800  | 0.14510800  | -5.21155000 |
| H | 1.84749500  | -0.57341500 | -3.73782400 |
| H | 2.70445500  | 3.57902500  | -4.76511300 |
| H | 1.58831100  | 2.61642000  | -5.75944300 |
| H | 3.32764400  | 2.29500500  | -5.81829900 |
| H | 4.98186300  | 1.30005900  | -4.64674400 |
| H | 6.94348900  | 1.20443900  | -3.13002600 |
| H | 6.64183400  | 1.34064300  | -0.67212200 |
| H | -0.10235000 | 2.80074800  | 2.65046500  |
| H | 3.27139300  | 1.45173800  | 1.05550400  |
| H | -2.35769000 | 2.81245600  | 4.72846800  |
| H | -0.67523500 | 2.29316300  | 4.97971300  |
| H | -1.70560800 | 1.39642100  | 3.83829700  |
| H | -1.36839200 | 5.23145200  | 4.06439600  |
| H | -0.15900100 | 5.32793200  | 2.76959900  |
| H | 0.26149800  | 4.58023400  | 4.32722800  |
| H | 4.85006900  | -0.48195100 | 1.15777400  |
| H | 4.89118800  | 0.56119300  | 2.58123000  |
| H | 6.21408200  | 0.64066700  | 1.39831600  |
| H | 5.80596700  | 3.22169900  | 1.09731800  |
| H | 4.57452400  | 3.07776600  | 2.37496200  |
| H | 4.15893600  | 3.82470600  | 0.82281900  |
| H | 3.51986400  | -3.04648800 | 4.50332700  |
| H | 5.29710700  | -3.81423500 | 2.94938500  |
| H | 4.91370200  | -3.77207600 | 0.49741300  |
| H | 0.13901400  | -1.76513900 | 3.39782200  |
| H | -1.42966200 | -2.79547600 | -2.67665700 |
| H | 2.41421500  | -1.15335400 | 5.36188500  |
| H | 0.74089800  | -0.55750100 | 5.44304900  |
| H | 1.76995000  | -0.08224400 | 4.07135000  |
| H | 0.16581600  | -4.12664200 | 4.30753200  |
| H | -0.23083700 | -2.92018600 | 5.55199500  |
| H | 1.38903700  | -3.64436700 | 5.49901600  |
| H | -2.93247100 | -1.41709700 | -4.97029600 |
| H | -1.19112600 | -1.77298900 | -4.92182300 |
| H | -1.89403100 | -0.62115000 | -3.76209600 |
| H | -2.66064600 | -4.89686400 | -3.35455900 |
| H | -1.56846200 | -4.29239600 | -4.62070600 |
| H | -3.31500700 | -4.04402900 | -4.76556700 |
| H | -4.98326300 | -2.70487500 | -3.99263100 |
| H | -6.94734000 | -2.15608100 | -2.57922700 |
| H | -6.64808900 | -1.51211500 | -0.20330400 |
| H | 1.82059000  | -2.32989800 | -1.08951000 |
| H | -3.27853900 | -1.05309200 | 1.46841400  |
| H | 4.73126700  | -3.17265200 | -1.60375400 |
| H | 4.18369800  | -1.50392000 | -1.33193800 |
| H | 3.61177700  | -2.41335000 | -2.74436800 |
| H | 2.06216900  | -4.41457900 | -2.46367600 |



|   |             |             |             |
|---|-------------|-------------|-------------|
| H | 1.34161200  | -4.79264000 | -0.88261200 |
| H | 3.04993700  | -5.15220900 | -1.18229900 |
| H | -4.86783300 | 0.80542400  | 0.95231300  |
| H | -4.89935000 | 0.26923400  | 2.63379600  |
| H | -6.22467700 | -0.18925700 | 1.54333100  |
| H | -4.15733500 | -3.38200500 | 2.00013100  |
| H | -5.80694100 | -2.72951900 | 2.06673000  |
| H | -4.57926200 | -2.18353600 | 3.23506300  |
| O | 1.43369500  | 0.83000100  | 1.92108700  |
| O | -1.43926500 | -0.18607100 | 2.08224500  |
| O | -1.29967600 | -0.96300800 | -0.80479800 |
| O | 1.29544400  | 0.65816600  | -1.06999400 |
| N | -2.04992600 | -2.01724500 | -0.47941200 |
| N | 2.04735800  | 1.75986900  | -1.09712700 |

**Dioxo Complex (higher energy conformation)**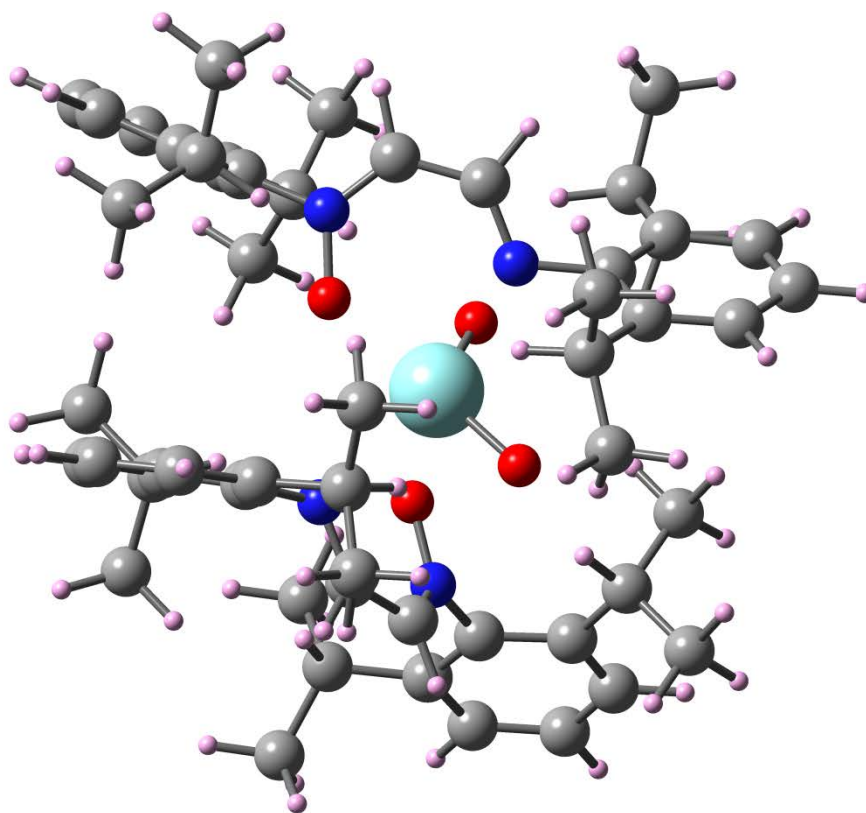

Fig. S49: NCCNO Dioxo Complex (higher energy conformation)

|    | SCF           | E <sub>ZP</sub> | H            | G            |
|----|---------------|-----------------|--------------|--------------|
|    | -2591.0754021 | -2589.927498    | -2589.857937 | -2590.035817 |
| Zr |               | -0.38641300     | -0.39588700  | -0.08974600  |
| O  |               | 1.90112300      | -0.10786800  | -0.11633800  |
| O  |               | -1.94430300     | 1.26483300   | -0.64217600  |
| O  |               | -0.66125900     | -1.03285900  | -1.84468800  |
| N  |               | -0.09450400     | 1.70216800   | 1.41749400   |
| N  |               | -2.85920800     | 1.62552900   | 0.26853100   |
| N  |               | 0.58789700      | -2.69428600  | -0.09382800  |
| N  |               | 2.75303500      | -0.76826400  | -0.93546900  |
| C  |               | -1.20228600     | 2.01744800   | 2.03781700   |
| C  |               | -2.55001200     | 1.83482800   | 1.54076300   |
| C  |               | 1.71362600      | -3.00720900  | -0.69361700  |
| C  |               | 2.71539500      | -2.07477400  | -1.14646400  |
| C  |               | 1.13782800      | 2.21232300   | 1.99981100   |
| C  |               | 1.64780100      | 1.67298800   | 3.21030200   |
| C  |               | 2.79616900      | 2.27846800   | 3.76644800   |
| C  |               | 3.42467700      | 3.36381100   | 3.14065300   |
| C  |               | 2.92658500      | 3.85111800   | 1.92055200   |
| C  |               | 1.78393800      | 3.28424900   | 1.32320200   |
| C  |               | 2.07817400      | -0.66588900  | 4.10047000   |

|   |             |             |             |
|---|-------------|-------------|-------------|
| C | 1.02533100  | 0.45647400  | 3.90775400  |
| C | 0.39195600  | 0.83993100  | 5.27161500  |
| C | -4.69334400 | -1.73732700 | -0.69701100 |
| C | -4.69708000 | -0.67617200 | 0.43546600  |
| C | -5.60459300 | -1.11789000 | 1.61098100  |
| C | -4.23521900 | 1.78528900  | -0.22597900 |
| C | -5.11798300 | 0.68510500  | -0.12410900 |
| C | -6.42938900 | 0.88452400  | -0.61155200 |
| C | -6.81662200 | 2.10593700  | -1.18197400 |
| C | -5.89780800 | 3.16364300  | -1.29183600 |
| C | -4.57789100 | 3.02613800  | -0.81769200 |
| C | 2.30965300  | 4.22396300  | -1.00780700 |
| C | 1.21499400  | 3.85635800  | 0.02138500  |
| C | 0.31354700  | 5.08759100  | 0.31553700  |
| C | -3.08154700 | 4.18273700  | -2.49088100 |
| C | -3.55914400 | 4.15327100  | -1.01267100 |
| C | -4.10406800 | 5.53428500  | -0.57291900 |
| C | -0.34803500 | -3.79234000 | 0.10952500  |
| C | -0.90091500 | -4.47258300 | -1.01819400 |
| C | -1.79380500 | -5.53554100 | -0.76203300 |
| C | -2.12826900 | -5.91730000 | 0.54438600  |
| C | -1.57847900 | -5.22500600 | 1.63396400  |
| C | -0.69125300 | -4.14878400 | 1.44212400  |
| C | -1.93540400 | -3.75294000 | -3.23138700 |
| C | -0.62329400 | -4.08720300 | -2.47828500 |
| C | 0.16792800  | -5.20160700 | -3.21438300 |
| C | 5.84889600  | 0.79804000  | 1.38519100  |
| C | 5.31927800  | -0.27906200 | 0.40681200  |
| C | 6.33378600  | -1.44760800 | 0.27251200  |
| C | 3.75218600  | 0.06604100  | -1.61808300 |
| C | 4.98511400  | 0.30776700  | -0.96830400 |
| C | 5.92711200  | 1.09357300  | -1.66435300 |
| C | 5.63272000  | 1.61454300  | -2.93537700 |
| C | 4.38999400  | 1.36389900  | -3.53896600 |
| C | 3.40862600  | 0.58257000  | -2.89132700 |
| C | -1.13189000 | -2.98523800 | 3.66457800  |
| C | -0.06034300 | -3.46901200 | 2.65794600  |
| C | 0.97482500  | -4.41575000 | 3.32592700  |
| C | 1.36165200  | 1.60134700  | -4.03116600 |
| C | 2.06278500  | 0.29944600  | -3.56858400 |
| C | 2.24844700  | -0.67259200 | -4.76471200 |
| H | -1.15962300 | 2.54460300  | 2.99765600  |
| H | -3.37864100 | 2.04918500  | 2.20392500  |
| H | 1.92065400  | -4.04556000 | -0.95942200 |
| H | 3.50682300  | -2.45792900 | -1.77993100 |
| H | 3.20185600  | 1.89317300  | 4.69870300  |
| H | 4.30058700  | 3.82217300  | 3.59386000  |
| H | 3.42954900  | 4.68178700  | 1.43299700  |
| H | 0.22967700  | 0.04515900  | 3.27574100  |
| H | -3.66541800 | -0.63909700 | 0.80906200  |
| H | 2.89068300  | -0.34884000 | 4.76704700  |
| H | 2.51984200  | -0.95732300 | 3.13928600  |

|   |             |             |             |
|---|-------------|-------------|-------------|
| H | 1.60817100  | -1.55142200 | 4.54402700  |
| H | 1.14711600  | 1.23802100  | 5.96275100  |
| H | -0.06627900 | -0.04090800 | 5.73966300  |
| H | -0.38798900 | 1.60436700  | 5.15651600  |
| H | -5.69398900 | -1.87957700 | -1.13070800 |
| H | -4.34791600 | -2.69746500 | -0.29516100 |
| H | -4.00110000 | -1.44507300 | -1.49473100 |
| H | -5.60351500 | -0.37735800 | 2.42291200  |
| H | -5.23289500 | -2.06565600 | 2.01978300  |
| H | -6.64644300 | -1.27215200 | 1.29637700  |
| H | -7.14450500 | 0.06889700  | -0.55071500 |
| H | -7.83123000 | 2.23232900  | -1.55276500 |
| H | -6.20718600 | 4.09743600  | -1.75303200 |
| H | 0.58049500  | 3.08596400  | -0.43227200 |
| H | -2.67521500 | 3.94103800  | -0.39919400 |
| H | 2.93148900  | 5.06171800  | -0.66548900 |
| H | 1.84494300  | 4.53020900  | -1.95443000 |
| H | 2.96704700  | 3.37052200  | -1.21121700 |
| H | 0.89925000  | 5.90041000  | 0.76580000  |
| H | -0.49799800 | 4.83593500  | 1.01091400  |
| H | -0.13661800 | 5.46401600  | -0.61301500 |
| H | -2.64322800 | 3.21917800  | -2.77366200 |
| H | -2.32379300 | 4.96555000  | -2.63169200 |
| H | -3.91903700 | 4.39416000  | -3.16886300 |
| H | -4.93996000 | 5.86125200  | -1.20424400 |
| H | -3.31465200 | 6.29290000  | -0.65495100 |
| H | -4.45492700 | 5.51609300  | 0.46711300  |
| H | -2.23882600 | -6.06276800 | -1.60205600 |
| H | -2.81403300 | -6.74478100 | 0.71226800  |
| H | -1.84036900 | -5.52358800 | 2.64559900  |
| H | -0.05381600 | -3.15292600 | -2.49766700 |
| H | 4.39905100  | -0.68137800 | 0.84683500  |
| H | -2.63287800 | -4.60149900 | -3.25619100 |
| H | -1.70598100 | -3.47225600 | -4.26849700 |
| H | -2.41641900 | -2.89480300 | -2.75360600 |
| H | 1.12045200  | -5.43129700 | -2.71504700 |
| H | 0.38890400  | -4.89148600 | -4.24489700 |
| H | -0.40783700 | -6.13610800 | -3.26326200 |
| H | 6.80217000  | 1.22287400  | 1.04435100  |
| H | 6.01982100  | 0.35250200  | 2.37394500  |
| H | 5.12730100  | 1.61366600  | 1.50097600  |
| H | 5.95021800  | -2.24495600 | -0.37754600 |
| H | 6.54418200  | -1.88405800 | 1.25754500  |
| H | 7.28344900  | -1.09752900 | -0.15292600 |
| H | 6.89126500  | 1.30223900  | -1.20915800 |
| H | 6.37282500  | 2.21873300  | -3.45480100 |
| H | 4.17518600  | 1.77948600  | -4.51951000 |
| H | 0.46932300  | -2.57743300 | 2.30683800  |
| H | 1.37335700  | -0.18340600 | -2.86580900 |
| H | -1.72800800 | -3.81728200 | 4.06335000  |
| H | -1.78516100 | -2.26882200 | 3.15461800  |
| H | -0.65327900 | -2.48658200 | 4.52023300  |

|   |             |             |             |
|---|-------------|-------------|-------------|
| H | 1.46325100  | -3.91910300 | 4.17535100  |
| H | 1.75515800  | -4.72376000 | 2.61598200  |
| H | 0.48907700  | -5.32605200 | 3.70239800  |
| H | 1.24340200  | 2.30383300  | -3.19762200 |
| H | 0.36169900  | 1.35634800  | -4.40795200 |
| H | 1.91570000  | 2.10903200  | -4.83302500 |
| H | 2.70306000  | -1.62098200 | -4.44769600 |
| H | 2.88919000  | -0.23586000 | -5.54320300 |
| H | 1.27180900  | -0.90057100 | -5.20824400 |
| O | -1.60798600 | -0.97572800 | 1.21522400  |

## Peroxo Complex

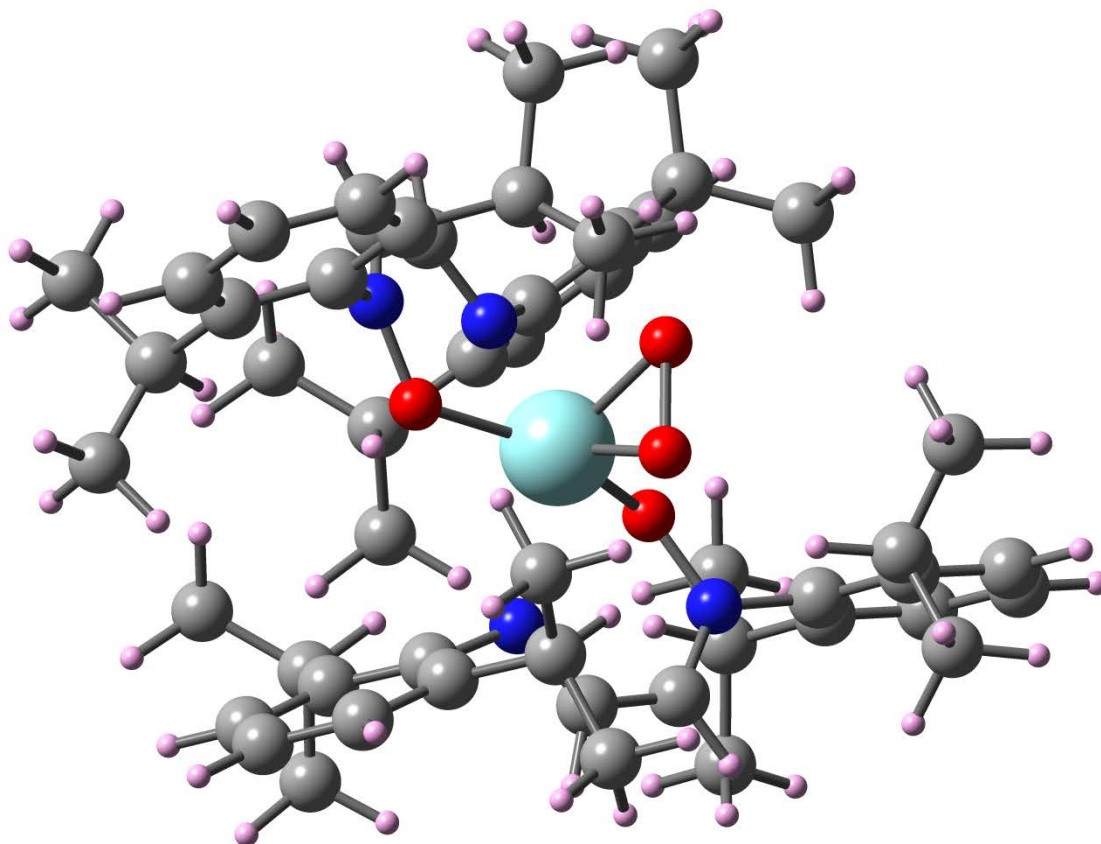

Fig. S50: NCCNO Peroxo Complex

| SCF           | E <sub>ZP</sub> | H            | G            |
|---------------|-----------------|--------------|--------------|
| -2591.0542294 | -2589.908017    | -2589.838352 | -2590.017931 |

|    |             |             |             |
|----|-------------|-------------|-------------|
| Zr | -0.00083300 | 0.00092800  | -0.37559200 |
| O  | 2.05643600  | 0.29148400  | 0.06151400  |
| O  | -2.05856200 | -0.29302500 | 0.07385500  |
| O  | -0.13561400 | 0.77220600  | -2.25539900 |
| O  | 0.11626300  | -0.76930100 | -2.25726300 |
| N  | 0.06850000  | -2.08412200 | 0.56652000  |
| N  | -2.81850100 | -1.43570800 | -0.16232400 |
| N  | -0.06768900 | 2.07973600  | 0.57708200  |
| N  | 2.82078200  | 1.43532200  | -0.15375200 |
| C  | -0.98370300 | -2.94891200 | 0.49570900  |
| C  | -2.30774800 | -2.65832400 | 0.12986100  |
| C  | 0.98677700  | 2.94357400  | 0.51819100  |
| C  | 2.31096900  | 2.65525900  | 0.15286500  |
| C  | 1.32397600  | -2.71964100 | 0.96614600  |
| C  | 2.08729400  | -3.45329500 | 0.01508800  |
| C  | 3.25773800  | -4.10549400 | 0.45992300  |
| C  | 3.66713700  | -4.03736800 | 1.79893900  |
| C  | 2.90949200  | -3.29781400 | 2.72011500  |

|   |             |             |             |
|---|-------------|-------------|-------------|
| C | 1.73559200  | -2.62459700 | 2.32509600  |
| C | 2.82439500  | -3.06355000 | -2.39077400 |
| C | 1.69080800  | -3.56701400 | -1.46169200 |
| C | 1.28805800  | -5.02079300 | -1.82637100 |
| C | -3.03907600 | -0.68316200 | -4.24681400 |
| C | -3.14663400 | -1.69908400 | -3.08209000 |
| C | -3.28219500 | -3.14644200 | -3.62760300 |
| C | -4.13676300 | -1.23244500 | -0.73275200 |
| C | -4.30517500 | -1.36865900 | -2.13558400 |
| C | -5.61050200 | -1.20389500 | -2.64759800 |
| C | -6.68914500 | -0.90542600 | -1.80125100 |
| C | -6.48766700 | -0.75969900 | -0.41871000 |
| C | -5.20506100 | -0.91311300 | 0.14523600  |
| C | 1.78123700  | -0.92451900 | 4.23829900  |
| C | 0.91107600  | -1.86447700 | 3.36784200  |
| C | 0.10857500  | -2.85169600 | 4.25822200  |
| C | -5.63720700 | 0.50171900  | 2.22911500  |
| C | -5.00029700 | -0.78868800 | 1.65748900  |
| C | -5.54929900 | -2.04545600 | 2.38691800  |
| C | -1.32315200 | 2.71466500  | 0.97774500  |
| C | -1.73683600 | 2.61464100  | 2.33574800  |
| C | -2.91090300 | 3.28703900  | 2.73170100  |
| C | -3.66675200 | 4.03066000  | 1.81234000  |
| C | -3.25512000 | 4.10413000  | 0.47428500  |
| C | -2.08430000 | 3.45314500  | 0.02868600  |
| C | -1.78666400 | 0.90520500  | 4.24040900  |
| C | -0.91462000 | 1.84972900  | 3.37683100  |
| C | -0.11462200 | 2.83278200  | 4.27405000  |
| C | 3.03038500  | 0.70418200  | -4.23971700 |
| C | 3.14230200  | 1.71550300  | -3.07144000 |
| C | 3.27680900  | 3.16499000  | -3.61144500 |
| C | 4.13816100  | 1.23675800  | -0.72734600 |
| C | 4.30350800  | 1.38066100  | -2.12978500 |
| C | 5.60777200  | 1.21992700  | -2.64561000 |
| C | 6.68857700  | 0.91825500  | -1.80307400 |
| C | 6.49024100  | 0.76483900  | -0.42092800 |
| C | 5.20856000  | 0.91353000  | 0.14653600  |
| C | -2.81627800 | 3.07707700  | -2.38108200 |
| C | -1.68436200 | 3.57406300  | -1.44655400 |
| C | -1.27879100 | 5.02928500  | -1.80233000 |
| C | 5.64379000  | -0.51630300 | 2.21938800  |
| C | 5.00666200  | 0.77863300  | 1.65825700  |
| C | 5.55767800  | 2.02972100  | 2.39582000  |
| H | -0.79077100 | -3.99977400 | 0.71256200  |
| H | -3.00929800 | -3.47790500 | 0.03042300  |
| H | 0.79469900  | 3.99233400  | 0.74565100  |
| H | 3.01435000  | 3.47468700  | 0.06582100  |
| H | 3.85161800  | -4.67213000 | -0.25313700 |
| H | 4.56779200  | -4.55422700 | 2.12237600  |
| H | 3.23149600  | -3.24645800 | 3.75736700  |
| H | 0.82549300  | -2.92523500 | -1.64953200 |
| H | -2.20090700 | -1.63421500 | -2.53639300 |

|   |             |             |             |
|---|-------------|-------------|-------------|
| H | 3.71853500  | -3.69816100 | -2.32291300 |
| H | 3.10974900  | -2.03855800 | -2.13032100 |
| H | 2.48277500  | -3.06793800 | -3.43376400 |
| H | 2.12500300  | -5.71627500 | -1.67661100 |
| H | 0.98609500  | -5.07746600 | -2.88066800 |
| H | 0.44817300  | -5.37226500 | -1.21234500 |
| H | -3.91996200 | -0.71191800 | -4.90301500 |
| H | -2.15418900 | -0.91534500 | -4.85151800 |
| H | -2.91766700 | 0.33618600  | -3.86617400 |
| H | -3.30446900 | -3.88410900 | -2.81429500 |
| H | -2.42993600 | -3.38265600 | -4.27758400 |
| H | -4.20221900 | -3.26660500 | -4.21590900 |
| H | -5.77896600 | -1.30382500 | -3.71645200 |
| H | -7.68623300 | -0.78289500 | -2.21821400 |
| H | -7.33128700 | -0.52432300 | 0.22452100  |
| H | 0.18277300  | -1.24426200 | 2.83268300  |
| H | -3.92383400 | -0.73006600 | 1.85202200  |
| H | 2.48221200  | -1.48669900 | 4.86926300  |
| H | 1.14634700  | -0.32808200 | 4.90634000  |
| H | 2.36383800  | -0.23656200 | 3.61316800  |
| H | 0.78457000  | -3.51546800 | 4.81379800  |
| H | -0.55604500 | -3.48005700 | 3.65185300  |
| H | -0.50794700 | -2.30578000 | 4.98531400  |
| H | -5.23576600 | 1.39124500  | 1.73145500  |
| H | -5.41663700 | 0.58427600  | 3.30166000  |
| H | -6.72934800 | 0.50277300  | 2.11522300  |
| H | -6.63119800 | -2.15084800 | 2.23072500  |
| H | -5.36820100 | -1.97014400 | 3.46743900  |
| H | -5.06645200 | -2.96222300 | 2.02442200  |
| H | -3.23452500 | 3.23172300  | 3.76825800  |
| H | -4.56765400 | 4.54667200  | 2.13645300  |
| H | -3.84741200 | 4.67426500  | -0.23730700 |
| H | -0.18486700 | 1.23229300  | 2.84044100  |
| H | 2.19847700  | 1.64923400  | -2.52263200 |
| H | -2.49058100 | 1.46394300  | 4.87114200  |
| H | -1.15341600 | 0.30680900  | 4.90830100  |
| H | -2.36611200 | 0.21921200  | 3.61025400  |
| H | 0.55115900  | 3.46449500  | 3.67245900  |
| H | 0.50047100  | 2.28349600  | 4.99982400  |
| H | -0.79216100 | 3.49344800  | 4.83144200  |
| H | 3.90947600  | 0.73484900  | -4.89822900 |
| H | 2.14395900  | 0.93925800  | -4.84104200 |
| H | 2.90940600  | -0.31656600 | -3.86272300 |
| H | 3.30245300  | 3.89911600  | -2.79505800 |
| H | 2.42242900  | 3.40444500  | -4.25744100 |
| H | 4.19479900  | 3.28699100  | -4.20253100 |
| H | 5.77393600  | 1.32586400  | -3.71425900 |
| H | 7.68492000  | 0.79914200  | -2.22280200 |
| H | 7.33549500  | 0.52670400  | 0.21915100  |
| H | -0.81927900 | 2.93229700  | -1.63553100 |
| H | 3.93044400  | 0.71946100  | 1.85432900  |
| H | -3.70956000 | 3.71283500  | -2.31245400 |



|   |             |             |             |
|---|-------------|-------------|-------------|
| H | -3.10382600 | 2.05124400  | -2.12648100 |
| H | -2.47189000 | 3.08589400  | -3.42312600 |
| H | -0.97409100 | 5.09131300  | -2.85555200 |
| H | -0.44000900 | 5.37625900  | -1.18425800 |
| H | -2.11524600 | 5.72500600  | -1.65092800 |
| H | 5.24128900  | -1.40196600 | 1.71573100  |
| H | 5.42472000  | -0.60677600 | 3.29160400  |
| H | 6.73575700  | -0.51696800 | 2.10385300  |
| H | 5.07442500  | 2.94932100  | 2.04114400  |
| H | 6.63927700  | 2.13592200  | 2.23813300  |
| H | 5.37885900  | 1.94648100  | 3.47613400  |

## 5.4 Structures with five oxygen atoms

## Oxo Peroxo Complex (conformation 1 higher energy)

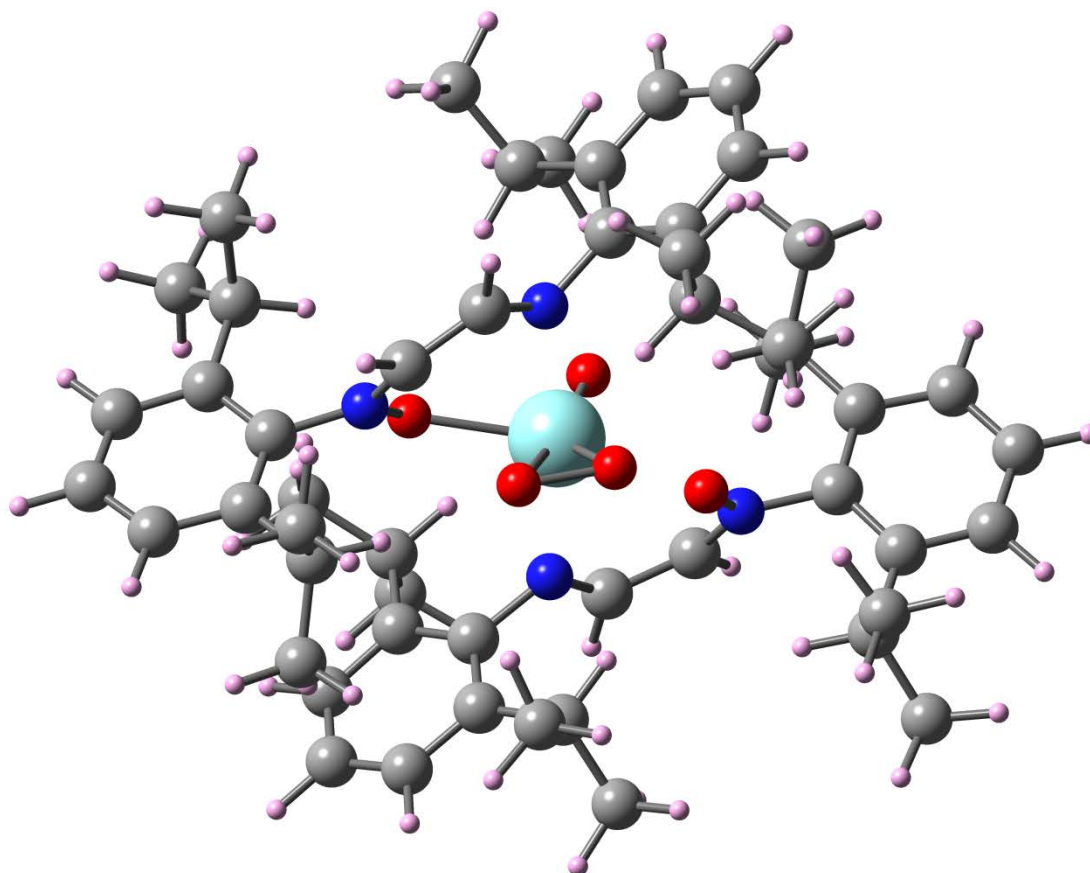

Fig. S51: NCCNO Oxo Peroxo Complex (conformation 1 higher energy)

| SCF            | $E_{ZP}$     | H            | G            |
|----------------|--------------|--------------|--------------|
| -2666.24044048 | -2665.088468 | -2665.018221 | -2665.196447 |

|    |             |             |             |
|----|-------------|-------------|-------------|
| Zr | 0.12067700  | 0.10585800  | 0.00833400  |
| O  | 2.27350800  | -0.85548500 | 0.28536200  |
| O  | -1.98746600 | 0.56210800  | -0.48272200 |
| O  | 0.95909600  | 0.70515500  | -1.52975600 |
| N  | -0.10461000 | 2.28171600  | 0.85760800  |
| N  | -2.84758200 | 0.98037100  | 0.53404200  |
| N  | 0.07130800  | -2.14342800 | -0.92347700 |
| N  | 2.97464800  | -1.39916900 | -0.70145700 |
| C  | -1.16202400 | 2.47444000  | 1.61306800  |
| C  | -2.39226600 | 1.72573100  | 1.54285100  |
| C  | 1.06124600  | -2.62252000 | -1.63335600 |
| C  | 2.42536100  | -2.14878000 | -1.65128000 |
| C  | 0.95273700  | 3.28161000  | 0.84981200  |
| C  | 1.80806800  | 3.46059800  | 1.97476800  |
| C  | 2.82150400  | 4.44037200  | 1.87728000  |

|   |             |             |             |
|---|-------------|-------------|-------------|
| C | 2.98275500  | 5.21845800  | 0.72277100  |
| C | 2.11820600  | 5.03235700  | -0.36719200 |
| C | 1.09173400  | 4.06805300  | -0.32942600 |
| C | 2.99374200  | 1.84761000  | 3.54445600  |
| C | 1.69392900  | 2.64648700  | 3.26904000  |
| C | 1.33719200  | 3.55385100  | 4.47580400  |
| C | -4.46845100 | -2.35731300 | 2.64750800  |
| C | -4.17633500 | -0.84237300 | 2.51213900  |
| C | -4.58771000 | -0.11543600 | 3.82389800  |
| C | -4.26169300 | 0.64988000  | 0.38032800  |
| C | -4.89146900 | -0.22230500 | 1.30578200  |
| C | -6.26743100 | -0.48184800 | 1.11155400  |
| C | -6.97448800 | 0.08565600  | 0.04420200  |
| C | -6.32535400 | 0.95439200  | -0.84913300 |
| C | -4.96098300 | 1.26667900  | -0.69611800 |
| C | 0.84357900  | 3.70615500  | -2.85219700 |
| C | 0.11813700  | 3.95717400  | -1.50828400 |
| C | -0.78139400 | 5.22163800  | -1.57854500 |
| C | -4.82539200 | 2.32210000  | -3.04457600 |
| C | -4.29778300 | 2.32216900  | -1.59029800 |
| C | -4.48912500 | 3.73120900  | -0.95864700 |
| C | -1.14620400 | -2.95258600 | -0.88691700 |
| C | -2.06087500 | -2.90608800 | -1.96986200 |
| C | -3.19950700 | -3.73611700 | -1.89175000 |
| C | -3.41605900 | -4.57164300 | -0.78556700 |
| C | -2.49510000 | -4.58980900 | 0.27450900  |
| C | -1.34216600 | -3.77884000 | 0.25208900  |
| C | -3.06794300 | -1.10635500 | -3.46937900 |
| C | -1.84389600 | -2.01482100 | -3.19909900 |
| C | -1.50352500 | -2.86707600 | -4.45150400 |
| C | 4.39681700  | -2.50135300 | 2.60374300  |
| C | 4.50073800  | -3.06202500 | 1.15829000  |
| C | 5.22612600  | -4.43027300 | 1.13973300  |
| C | 4.43434000  | -1.20329900 | -0.64280000 |
| C | 5.16787000  | -2.03139500 | 0.24148800  |
| C | 6.56189600  | -1.82682500 | 0.28719000  |
| C | 7.17403700  | -0.84591800 | -0.51069000 |
| C | 6.40498400  | -0.03445900 | -1.35873400 |
| C | 5.00241900  | -0.18141100 | -1.43783900 |
| C | -0.94292300 | -3.62106700 | 2.78364000  |
| C | -0.31463000 | -3.85813600 | 1.38894400  |
| C | 0.43916200  | -5.21569400 | 1.33814000  |
| C | 4.53630300  | 2.21456500  | -2.17308100 |
| C | 4.16545100  | 0.72113400  | -2.35078800 |
| C | 4.32890800  | 0.29491300  | -3.83555400 |
| H | -1.17169900 | 3.28907600  | 2.34246100  |
| H | -3.13425800 | 1.96215800  | 2.29694200  |
| H | 0.89679400  | -3.51709900 | -2.24169000 |
| H | 3.10489900  | -2.54844500 | -2.39265900 |
| H | 3.49134000  | 4.59015800  | 2.72062800  |
| H | 3.77078100  | 5.96674400  | 0.67403600  |
| H | 2.23592500  | 5.64676100  | -1.25643400 |

|   |             |             |             |
|---|-------------|-------------|-------------|
| H | 0.91097900  | 1.89316100  | 3.15340400  |
| H | -3.09404000 | -0.72782100 | 2.39019900  |
| H | 3.86115100  | 2.50730300  | 3.68591500  |
| H | 3.20468000  | 1.16690900  | 2.71177300  |
| H | 2.87392500  | 1.24139600  | 4.45209400  |
| H | 2.12579900  | 4.29194400  | 4.67661200  |
| H | 1.20901700  | 2.94437400  | 5.38043400  |
| H | 0.40353900  | 4.10732200  | 4.30321200  |
| H | -5.52587000 | -2.55236300 | 2.87086800  |
| H | -3.87574600 | -2.77368600 | 3.47124100  |
| H | -4.20353200 | -2.89522200 | 1.73134100  |
| H | -4.38065200 | 0.96182700  | 3.78593800  |
| H | -4.03193000 | -0.53172300 | 4.67348400  |
| H | -5.66125600 | -0.23884100 | 4.02131100  |
| H | -6.78406800 | -1.14309100 | 1.80113000  |
| H | -8.03054200 | -0.13846700 | -0.08778300 |
| H | -6.88844600 | 1.40217800  | -1.66216900 |
| H | -0.52448900 | 3.08855800  | -1.34199300 |
| H | -3.22536700 | 2.10911000  | -1.63144000 |
| H | 1.57233600  | 4.49555000  | -3.08408400 |
| H | 0.11203100  | 3.67612700  | -3.67212700 |
| H | 1.34481300  | 2.73437000  | -2.80694400 |
| H | -0.18487200 | 6.12393700  | -1.77020200 |
| H | -1.32978100 | 5.37755600  | -0.63930400 |
| H | -1.51390400 | 5.12338700  | -2.39180700 |
| H | -4.75965600 | 1.32604700  | -3.49702700 |
| H | -4.22552600 | 3.01152200  | -3.65269100 |
| H | -5.86878300 | 2.65940300  | -3.10525000 |
| H | -5.55447900 | 3.99447800  | -0.90996900 |
| H | -3.97445000 | 4.49089000  | -1.56065400 |
| H | -4.08235500 | 3.77665500  | 0.05951200  |
| H | -3.92207300 | -3.72508900 | -2.70366100 |
| H | -4.29900100 | -5.20534100 | -0.74846300 |
| H | -2.66967900 | -5.24282600 | 1.12584600  |
| H | -0.99776500 | -1.34505600 | -3.00831200 |
| H | 3.47380200  | -3.23459500 | 0.81254800  |
| H | -3.96498000 | -1.69034100 | -3.71532200 |
| H | -2.85718700 | -0.44081600 | -4.31713300 |
| H | -3.27915100 | -0.49067700 | -2.59038100 |
| H | -0.60459600 | -3.47975900 | -4.29712000 |
| H | -1.32651200 | -2.21602000 | -5.31758700 |
| H | -2.32817000 | -3.54761100 | -4.70197800 |
| H | 5.39271300  | -2.28307300 | 3.01179100  |
| H | 3.91238500  | -3.23552000 | 3.26091300  |
| H | 3.80211000  | -1.58199500 | 2.62257800  |
| H | 5.32166500  | -4.82402200 | 0.11941300  |
| H | 4.66271300  | -5.15867900 | 1.73700200  |
| H | 6.23278400  | -4.36311600 | 1.57129700  |
| H | 7.16980300  | -2.43490900 | 0.95082300  |
| H | 8.25162900  | -0.70795400 | -0.46286800 |
| H | 6.89185400  | 0.73181200  | -1.95454200 |
| H | 0.42506200  | -3.06242500 | 1.25048300  |

|   |             |             |             |
|---|-------------|-------------|-------------|
| H | 3.10218800  | 0.63196600  | -2.08863600 |
| H | -1.73932800 | -4.34425200 | 3.00398200  |
| H | -1.34549100 | -2.60505700 | 2.84942800  |
| H | -0.17185500 | -3.72267400 | 3.55868300  |
| H | 1.21521600  | -5.24835300 | 2.11445600  |
| H | 0.92039500  | -5.37650300 | 0.36326400  |
| H | -0.24662300 | -6.05575200 | 1.51124100  |
| H | 4.41982600  | 2.53052300  | -1.12992300 |
| H | 3.86398400  | 2.83046500  | -2.78134600 |
| H | 5.56646400  | 2.42845000  | -2.48995500 |
| H | 4.01992600  | -0.74695300 | -3.99729400 |
| H | 5.37186200  | 0.39118400  | -4.16829600 |
| H | 3.70436700  | 0.93099900  | -4.47509700 |
| O | -0.91362200 | -0.11623900 | 2.13375000  |
| O | 0.55608700  | -0.00775500 | 2.09874000  |

**Oxo Peroxo Complex (conformation 2 lowest energy)**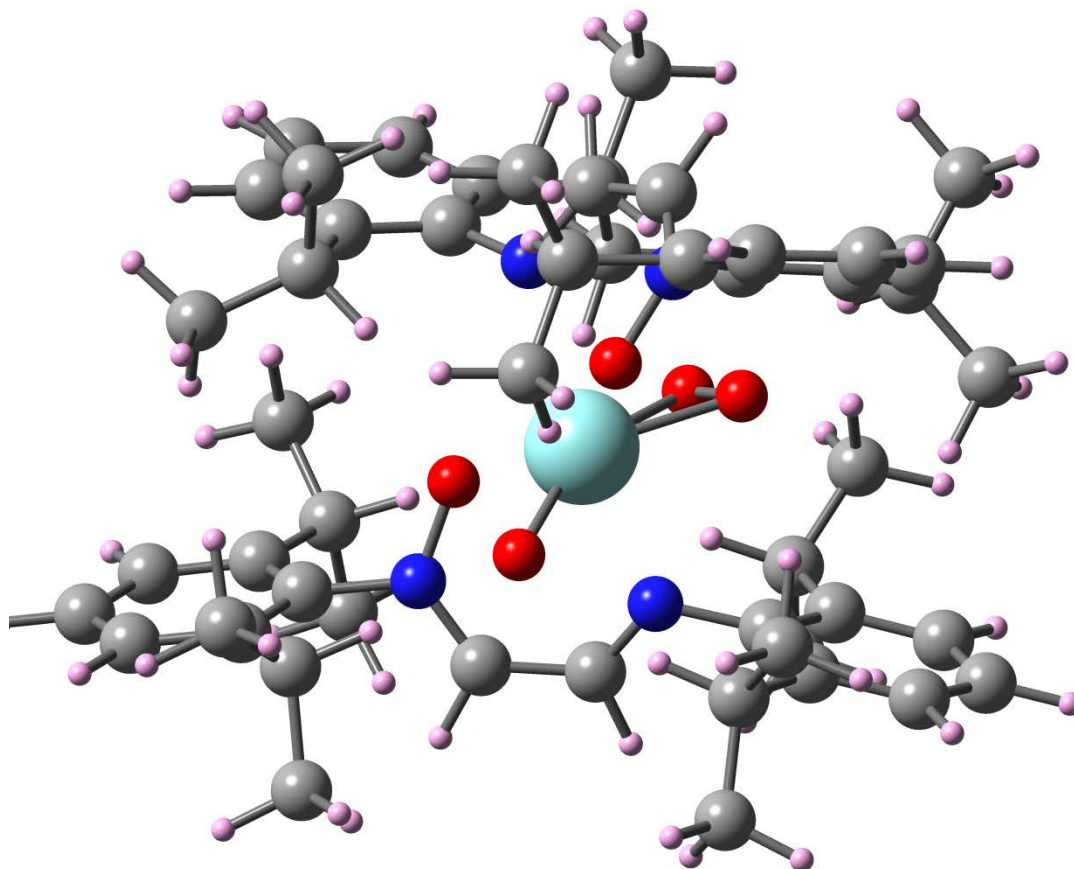

Fig. S52: NCCNO Oxo Peroxo Complex (conformation 2 lowest energy)

|    | <b>SCF</b>     | <b>E<sub>ZP</sub></b> | <b>H</b>     | <b>G</b>     |
|----|----------------|-----------------------|--------------|--------------|
|    | -2666.24191265 | -2665.090548          | -2665.020213 | -2665.197779 |
| Zr |                | -0.21880700           | -0.08677600  | -0.24052100  |
| O  |                | 2.04472500            | -0.10032400  | -0.11827000  |
| O  |                | -2.03584900           | 1.24061500   | -0.55349000  |
| O  |                | 0.00750000            | -0.02486100  | -2.08586800  |
| N  |                | -0.05066000           | 1.68430100   | 1.43345800   |
| N  |                | -2.91210000           | 1.62016300   | 0.40257700   |
| N  |                | 0.27622500            | -2.44008800  | -0.68069700  |
| N  |                | 2.82605400            | -0.76915800  | -0.99273300  |
| C  |                | -1.14988500           | 2.01977500   | 2.08345300   |
| C  |                | -2.51157200           | 1.90888400   | 1.63554200   |
| C  |                | 1.43599400            | -2.83439300  | -1.13714200  |
| C  |                | 2.58127200            | -1.99613700  | -1.42078400  |
| C  |                | 1.19889800            | 2.11584600   | 2.04754200   |
| C  |                | 1.60844100            | 1.61540000   | 3.31584500   |
| C  |                | 2.79140400            | 2.14737800   | 3.87575600   |
| C  |                | 3.54259200            | 3.12542900   | 3.21131800   |
| C  |                | 3.13114800            | 3.58443200   | 1.94881100   |

|   |             |             |             |
|---|-------------|-------------|-------------|
| C | 1.96018000  | 3.09172100  | 1.34185800  |
| C | 1.77982900  | -0.71775400 | 4.30276400  |
| C | 0.86279500  | 0.51201400  | 4.07681400  |
| C | 0.30014100  | 1.02722900  | 5.42760700  |
| C | -5.28496100 | -1.79189500 | 0.91840300  |
| C | -4.81715100 | -0.41170000 | 1.44592900  |
| C | -5.37104900 | -0.16356900 | 2.87542100  |
| C | -4.31654000 | 1.68924800  | -0.00479300 |
| C | -5.22542700 | 0.72487500  | 0.49967100  |
| C | -6.56973200 | 0.84401400  | 0.08258700  |
| C | -6.96926700 | 1.85091200  | -0.80797000 |
| C | -6.03228800 | 2.77044700  | -1.30819600 |
| C | -4.67979800 | 2.71412500  | -0.91682100 |
| C | 2.62141500  | 4.09596700  | -0.93316800 |
| C | 1.47312400  | 3.66108100  | 0.00513200  |
| C | 0.50433000  | 4.85365900  | 0.24353300  |
| C | -3.23706600 | 3.26514200  | -2.92053600 |
| C | -3.66181100 | 3.70423300  | -1.49196400 |
| C | -4.18315800 | 5.16258500  | -1.48654000 |
| C | -0.73265300 | -3.48221600 | -0.49958900 |
| C | -1.76429400 | -3.58936900 | -1.47279500 |
| C | -2.71778700 | -4.61438100 | -1.30556300 |
| C | -2.65883200 | -5.49622000 | -0.21619600 |
| C | -1.63001000 | -5.36801000 | 0.72763500  |
| C | -0.64370100 | -4.36560000 | 0.61083400  |
| C | -3.20612800 | -2.02414600 | -2.89199800 |
| C | -1.82294900 | -2.69938600 | -2.72044900 |
| C | -1.45415400 | -3.51968100 | -3.98666400 |
| C | 5.72304700  | 0.06354700  | 1.93892600  |
| C | 5.14319100  | -0.79763700 | 0.79077100  |
| C | 5.90856500  | -2.14549200 | 0.67737200  |
| C | 4.04299000  | -0.06583100 | -1.42983600 |
| C | 5.15560400  | -0.06366800 | -0.55459100 |
| C | 6.31575700  | 0.59985600  | -1.00378900 |
| C | 6.34548700  | 1.23025500  | -2.25903200 |
| C | 5.21722100  | 1.21003900  | -3.09398800 |
| C | 4.02564800  | 0.56175100  | -2.70007800 |
| C | -0.14788200 | -4.14310100 | 3.09945300  |
| C | 0.45385100  | -4.27670200 | 1.67797900  |
| C | 1.41687100  | -5.49170900 | 1.59351400  |
| C | 2.50465900  | 1.89250100  | -4.27620100 |
| C | 2.80840100  | 0.51731600  | -3.63296100 |
| C | 3.02109300  | -0.54703300 | -4.74525500 |
| H | -1.05717600 | 2.48873000  | 3.06597500  |
| H | -3.29284400 | 2.19485000  | 2.32863300  |
| H | 1.59161000  | -3.88692300 | -1.38642700 |
| H | 3.35849400  | -2.42045100 | -2.04520600 |
| H | 3.12556000  | 1.78358700  | 4.84435700  |
| H | 4.44423800  | 3.52590400  | 3.66920600  |
| H | 3.72453300  | 4.33560000  | 1.43671200  |
| H | 0.03673700  | 0.14351400  | 3.46077000  |
| H | -3.72530200 | -0.46893400 | 1.50797200  |

|   |             |             |             |
|---|-------------|-------------|-------------|
| H | 2.64819000  | -0.47652900 | 4.93174700  |
| H | 2.13810500  | -1.10437800 | 3.34182300  |
| H | 1.21305100  | -1.51829100 | 4.79477200  |
| H | 1.10383500  | 1.35025600  | 6.10361800  |
| H | -0.26103900 | 0.22898300  | 5.93111900  |
| H | -0.37634600 | 1.88234800  | 5.29024200  |
| H | -6.37991800 | -1.87991900 | 0.89938700  |
| H | -4.89222500 | -2.58292300 | 1.56858200  |
| H | -4.90376000 | -1.97691800 | -0.09200600 |
| H | -5.01784200 | 0.78939000  | 3.29325100  |
| H | -5.04429100 | -0.96717100 | 3.54749000  |
| H | -6.46940800 | -0.14039000 | 2.88043600  |
| H | -7.30232000 | 0.12932500  | 0.44677000  |
| H | -8.00910200 | 1.91571800  | -1.11978900 |
| H | -6.35558200 | 3.53923000  | -2.00389100 |
| H | 0.90589100  | 2.87833700  | -0.51333700 |
| H | -2.75766400 | 3.67740500  | -0.87241000 |
| H | 3.16203100  | 4.96776200  | -0.54148700 |
| H | 2.21069500  | 4.38285600  | -1.90957200 |
| H | 3.34128600  | 3.28386500  | -1.08892000 |
| H | 1.02444300  | 5.67880500  | 0.74878500  |
| H | -0.35153300 | 4.56318800  | 0.86500100  |
| H | 0.11729600  | 5.22750600  | -0.71383200 |
| H | -2.77260100 | 2.27434900  | -2.89382700 |
| H | -2.50830000 | 3.97572600  | -3.33327800 |
| H | -4.10339000 | 3.23457900  | -3.59555800 |
| H | -5.02656600 | 5.29859400  | -2.17561400 |
| H | -3.38480200 | 5.84248400  | -1.81113000 |
| H | -4.51031200 | 5.47205700  | -0.48525900 |
| H | -3.50977700 | -4.72556300 | -2.04208100 |
| H | -3.40618300 | -6.27884100 | -0.10581600 |
| H | -1.59190100 | -6.05233400 | 1.57156700  |
| H | -1.09148600 | -1.88989700 | -2.62776700 |
| H | 4.10375600  | -1.01887600 | 1.05753600  |
| H | -4.01049200 | -2.75704400 | -3.04702500 |
| H | -3.18572000 | -1.35571300 | -3.76247700 |
| H | -3.45603200 | -1.41792400 | -2.01339300 |
| H | -0.45507700 | -3.96798800 | -3.89573200 |
| H | -1.45378200 | -2.86801400 | -4.87051000 |
| H | -2.17112200 | -4.33386200 | -4.16228100 |
| H | 6.78785100  | 0.28429300  | 1.78712000  |
| H | 5.63065100  | -0.47648800 | 2.89017300  |
| H | 5.18125200  | 1.01052800  | 2.03285200  |
| H | 5.48097400  | -2.79106600 | -0.10108200 |
| H | 5.86412600  | -2.68873900 | 1.63023700  |
| H | 6.96525000  | -1.97760800 | 0.43050100  |
| H | 7.19729000  | 0.62464500  | -0.36963100 |
| H | 7.25017200  | 1.73736100  | -2.58637200 |
| H | 5.25520000  | 1.70686600  | -4.05900900 |
| H | 1.02759500  | -3.36108100 | 1.50973200  |
| H | 1.90809700  | 0.24068200  | -3.06607900 |
| H | -0.75566600 | -5.01599800 | 3.37321600  |



|   |             |             |             |
|---|-------------|-------------|-------------|
| H | -0.76515200 | -3.24104200 | 3.14821000  |
| H | 0.65882200  | -4.05247000 | 3.84053600  |
| H | 2.21164500  | -5.40143400 | 2.34668000  |
| H | 1.88997700  | -5.56900600 | 0.60442500  |
| H | 0.88496700  | -6.43461900 | 1.77835200  |
| H | 2.38901200  | 2.66944800  | -3.51301300 |
| H | 1.56110900  | 1.82589500  | -4.83117500 |
| H | 3.28736600  | 2.21032600  | -4.97951600 |
| H | 3.18259400  | -1.55061200 | -4.32953900 |
| H | 3.88860400  | -0.30075300 | -5.37374500 |
| H | 2.13209600  | -0.59233200 | -5.38649900 |
| O | -1.63100700 | -1.02251900 | 1.04048100  |
| O | -0.29401500 | -1.18697800 | 1.69260800  |

**Oxo Peroxo Complex (conformation 3 higher energy)**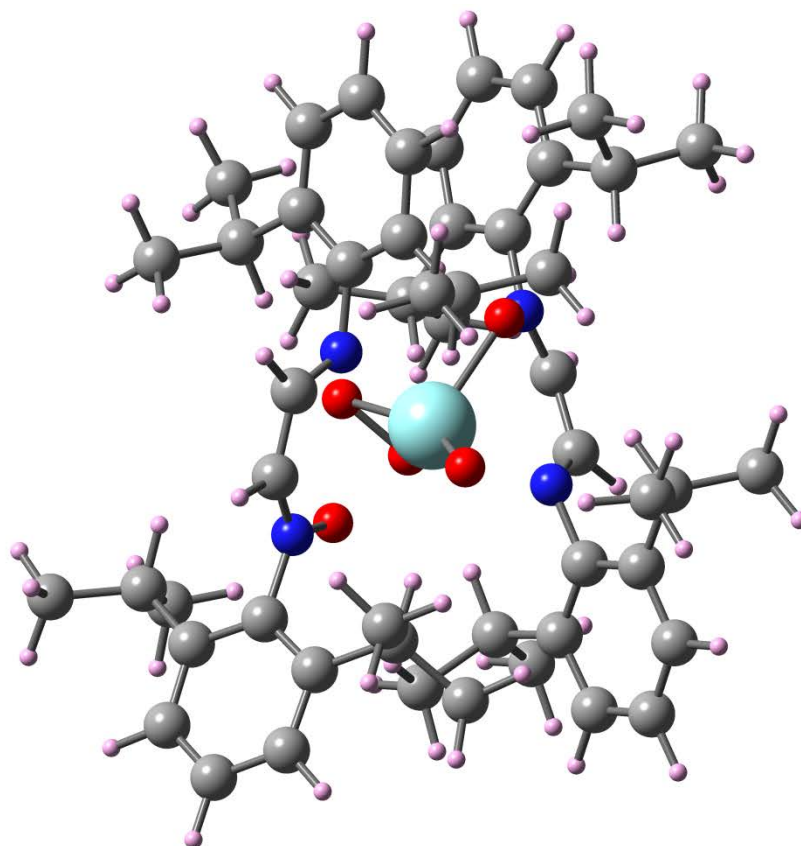

Fig. S53: NCCNO Oxo Peroxo Complex (conformation 3 higher energy)

| SCF            | E <sub>ZP</sub> | H            | G            |
|----------------|-----------------|--------------|--------------|
| -2666.23672257 | -2665.084989    | -2665.014674 | -2665.192064 |

|    |             |             |             |
|----|-------------|-------------|-------------|
| Zr | -0.04315700 | -0.10825000 | 0.01958000  |
| O  | 2.06866300  | -0.74852700 | 0.25704300  |
| O  | -2.01585400 | 0.90148800  | -0.61117600 |
| O  | 0.07114800  | -0.48124800 | -2.10105700 |
| O  | 0.49990000  | 0.93463500  | -1.87187400 |
| N  | 0.22085100  | 2.04226400  | 1.06963600  |
| N  | -2.72046000 | 1.74547500  | 0.13184800  |
| N  | -0.11776400 | -2.47627700 | -0.40407900 |
| N  | 2.67903700  | -1.34315600 | -0.82683800 |
| C  | -0.82333000 | 2.75284800  | 1.41512900  |
| C  | -2.20646600 | 2.56690800  | 1.04207100  |
| C  | 0.82381300  | -2.96765200 | -1.16824400 |
| C  | 2.08684900  | -2.33006900 | -1.48416700 |
| C  | 1.49721200  | 2.47547000  | 1.64090300  |
| C  | 1.81505700  | 2.09609100  | 2.97311300  |
| C  | 3.03585200  | 2.56417200  | 3.50815400  |
| C  | 3.90491500  | 3.36212300  | 2.75181300  |

|   |             |             |             |
|---|-------------|-------------|-------------|
| C | 3.57015100  | 3.70896200  | 1.43222800  |
| C | 2.36303000  | 3.27660600  | 0.84708000  |
| C | 1.64883700  | -0.06028800 | 4.31591100  |
| C | 0.90322200  | 1.21069100  | 3.83286500  |
| C | 0.33267900  | 2.00085500  | 5.04018200  |
| C | -4.92772700 | -1.37188500 | 1.77803100  |
| C | -4.40374300 | 0.08447600  | 1.83435700  |
| C | -4.72164400 | 0.72313900  | 3.21358100  |
| C | -4.16960500 | 1.74643500  | -0.13043400 |
| C | -4.98049700 | 0.93835100  | 0.69898900  |
| C | -6.36724400 | 0.96076400  | 0.43317700  |
| C | -6.88938900 | 1.72846300  | -0.61972800 |
| C | -6.03997100 | 2.48930200  | -1.44146900 |
| C | -4.64788100 | 2.51600200  | -1.21804200 |
| C | 3.18348200  | 3.88629500  | -1.50867600 |
| C | 1.96844300  | 3.71314000  | -0.56861600 |
| C | 1.15358900  | 5.03698600  | -0.52403100 |
| C | -3.36560400 | 2.40581600  | -3.39389600 |
| C | -3.70654000 | 3.28079500  | -2.15435600 |
| C | -4.26829000 | 4.65753300  | -2.58273400 |
| C | -1.28618300 | -3.30621100 | -0.14838300 |
| C | -2.23669900 | -3.52186400 | -1.18679500 |
| C | -3.34173300 | -4.35114500 | -0.89481600 |
| C | -3.50244500 | -4.93969700 | 0.36761700  |
| C | -2.55913500 | -4.69393000 | 1.37746700  |
| C | -1.43931800 | -3.87022400 | 1.14617900  |
| C | -3.35722900 | -1.95731900 | -2.84970400 |
| C | -2.13690500 | -2.87531200 | -2.57562300 |
| C | -1.99283300 | -3.94460500 | -3.69032600 |
| C | 5.15267700  | -0.65194800 | 2.30824300  |
| C | 4.84578800  | -1.62701900 | 1.14366900  |
| C | 5.71913900  | -2.90653300 | 1.24710700  |
| C | 4.00740100  | -0.85015500 | -1.19157400 |
| C | 5.03675000  | -0.95049200 | -0.21855100 |
| C | 6.30632800  | -0.44900000 | -0.56832700 |
| C | 6.54153300  | 0.10863300  | -1.83440400 |
| C | 5.50954700  | 0.16534400  | -2.78214800 |
| C | 4.21101200  | -0.30719700 | -2.49144900 |
| C | -1.07781700 | -3.02482600 | 3.51778700  |
| C | -0.41641100 | -3.64752500 | 2.26352600  |
| C | 0.33011300  | -4.96548800 | 2.60373000  |
| C | 2.99399200  | 1.16521200  | -4.20361600 |
| C | 3.13325900  | -0.24645900 | -3.58487800 |
| C | 3.43974300  | -1.29022100 | -4.69584200 |
| H | -0.68006700 | 3.60117200  | 2.09026000  |
| H | -2.93295900 | 3.20545400  | 1.52936900  |
| H | 0.69790000  | -3.95322100 | -1.62531400 |
| H | 2.67403300  | -2.77545800 | -2.27760600 |
| H | 3.30561100  | 2.29407900  | 4.52623300  |
| H | 4.84019500  | 3.71013500  | 3.18433900  |
| H | 4.25440200  | 4.32149400  | 0.85328200  |
| H | 0.06276800  | 0.85506600  | 3.22648100  |

|   |             |             |             |
|---|-------------|-------------|-------------|
| H | -3.31138100 | 0.02269700  | 1.73729200  |
| H | 2.49482600  | 0.18241700  | 4.97368500  |
| H | 2.02966200  | -0.63281400 | 3.46187800  |
| H | 0.95833900  | -0.70497700 | 4.87444600  |
| H | 1.13217200  | 2.34593400  | 5.71014200  |
| H | -0.34435500 | 1.36244400  | 5.62302200  |
| H | -0.23163600 | 2.88528700  | 4.71385500  |
| H | -6.01020300 | -1.43177700 | 1.95872700  |
| H | -4.42394600 | -1.96955400 | 2.54717000  |
| H | -4.71136600 | -1.83468200 | 0.80832000  |
| H | -4.30639200 | 1.73670800  | 3.29739500  |
| H | -4.28299500 | 0.11477400  | 4.01451000  |
| H | -5.80503200 | 0.78812900  | 3.38605700  |
| H | -7.03580100 | 0.36303100  | 1.04610100  |
| H | -7.96047400 | 1.72734500  | -0.80847900 |
| H | -6.46137900 | 3.06382200  | -2.26084000 |
| H | 1.32800000  | 2.93423700  | -1.00123800 |
| H | -2.76009800 | 3.46383700  | -1.62959900 |
| H | 3.81132400  | 4.73929200  | -1.21642700 |
| H | 2.83416100  | 4.07549400  | -2.53130500 |
| H | 3.80934400  | 2.98639400  | -1.52368400 |
| H | 1.75420700  | 5.84978000  | -0.09294600 |
| H | 0.24215500  | 4.93718600  | 0.07829500  |
| H | 0.85533100  | 5.33129500  | -1.53895800 |
| H | -2.86559900 | 1.48077200  | -3.09036400 |
| H | -2.68880400 | 2.95127900  | -4.06419400 |
| H | -4.27653300 | 2.15258600  | -3.95345300 |
| H | -5.15229400 | 4.55478600  | -3.22506500 |
| H | -3.51005400 | 5.20223900  | -3.15955700 |
| H | -4.54677300 | 5.27173400  | -1.71635500 |
| H | -4.08433100 | -4.53355400 | -1.66788700 |
| H | -4.35920100 | -5.58000800 | 0.56495300  |
| H | -2.69143400 | -5.14782100 | 2.35657400  |
| H | -1.25939000 | -2.22389500 | -2.61699500 |
| H | 3.79917300  | -1.92443500 | 1.24775800  |
| H | -4.30065100 | -2.52026500 | -2.84718500 |
| H | -3.24962700 | -1.47785800 | -3.83168900 |
| H | -3.42280600 | -1.16514900 | -2.09532400 |
| H | -1.11117800 | -4.58058100 | -3.52975800 |
| H | -1.88734800 | -3.45729500 | -4.66863500 |
| H | -2.87124100 | -4.60229400 | -3.73505100 |
| H | 6.20214500  | -0.32767600 | 2.29624600  |
| H | 4.96660000  | -1.14588700 | 3.27118600  |
| H | 4.51787200  | 0.23824000  | 2.25171300  |
| H | 5.49357600  | -3.61391500 | 0.43813400  |
| H | 5.53391700  | -3.41245700 | 2.20391800  |
| H | 6.78958200  | -2.66815600 | 1.19559500  |
| H | 7.11762900  | -0.50694800 | 0.15223600  |
| H | 7.52848400  | 0.49057900  | -2.08462200 |
| H | 5.70734700  | 0.59170400  | -3.76125500 |
| H | 0.32254000  | -2.92131800 | 1.91118100  |
| H | 2.15365800  | -0.46891900 | -3.15505100 |

|   |             |             |             |
|---|-------------|-------------|-------------|
| H | -1.87778200 | -3.66284700 | 3.91814700  |
| H | -1.48262600 | -2.04261400 | 3.25079400  |
| H | -0.32872700 | -2.89085400 | 4.31095800  |
| H | 1.09292600  | -4.78276700 | 3.37272200  |
| H | 0.82897600  | -5.38624800 | 1.71950800  |
| H | -0.36044900 | -5.72718200 | 2.99022800  |
| H | 2.67622800  | 1.87963600  | -3.44126100 |
| H | 2.21534700  | 1.14461600  | -4.97639800 |
| H | 3.92490100  | 1.51736300  | -4.66905900 |
| H | 3.53598700  | -2.31080100 | -4.29842300 |
| H | 4.37780600  | -1.05430800 | -5.21649900 |
| H | 2.63097700  | -1.29143500 | -5.43746100 |
| O | -1.06375300 | -0.37851200 | 1.57026100  |

**Oxo Peroxo Complex (butterfly conformation)**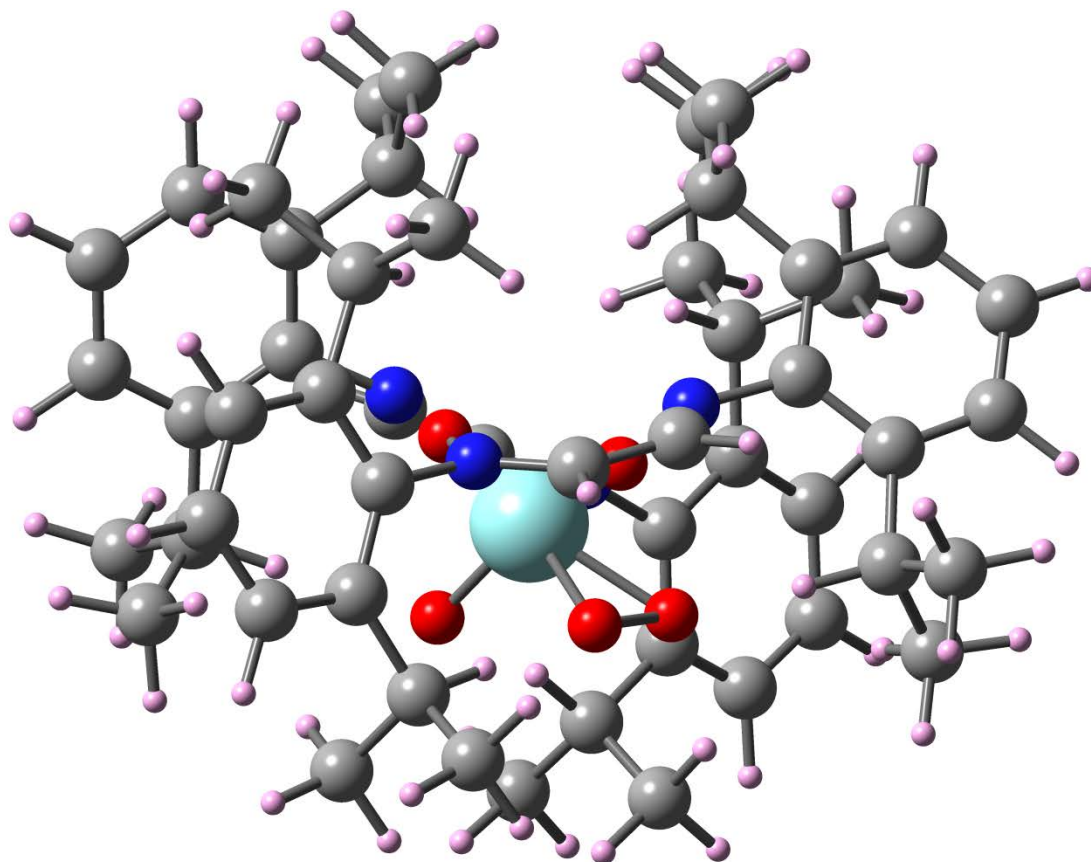

Fig. S54: NCCNO Oxo Peroxo Complex (butterfly conformation)

| SCF          | E <sub>ZP</sub> | H            | G            |
|--------------|-----------------|--------------|--------------|
| -2666.248035 | -2665.096245    | -2665.025988 | -2665.204376 |

|   |             |             |             |
|---|-------------|-------------|-------------|
| O | 2.08359824  | 0.46550763  | -0.04029076 |
| O | 0.91981243  | -1.46117489 | -1.96430182 |
| N | -0.10570440 | 2.23985426  | 0.66766910  |
| N | 2.74419222  | 1.62759924  | -0.20038365 |
| N | -2.71281106 | -1.37560391 | -0.31422038 |
| N | 0.14127737  | -2.34178147 | 0.52301479  |
| C | 0.88668319  | 3.08331981  | 0.57599237  |
| C | 2.22364200  | 2.80653039  | 0.07844697  |
| C | -2.16589266 | -2.58051194 | -0.36787900 |
| C | -0.86449496 | -3.05058202 | 0.07040747  |
| C | -1.36884073 | 2.80934413  | 1.13877073  |
| C | -2.12949158 | 3.65362435  | 0.28077246  |
| C | -3.33119779 | 4.18821471  | 0.79691426  |
| C | -3.76224264 | 3.90855295  | 2.09978139  |
| C | -2.98937090 | 3.07711718  | 2.92602720  |
| C | -1.78560200 | 2.51103842  | 2.46432752  |

|   |             |             |             |
|---|-------------|-------------|-------------|
| C | -2.85781029 | 3.68117797  | -2.15978871 |
| C | -1.72100957 | 4.00170108  | -1.15633602 |
| C | -1.30421069 | 5.49279984  | -1.27140005 |
| C | 3.08701184  | 0.51999566  | -4.04541320 |
| C | 3.19429769  | 1.75409882  | -3.11026779 |
| C | 3.37768874  | 3.05857909  | -3.92954567 |
| C | 4.12670181  | 1.50588006  | -0.69934647 |
| C | 4.33022890  | 1.57568251  | -2.09825372 |
| C | 5.66586837  | 1.46156924  | -2.54283809 |
| C | 6.72151041  | 1.27712435  | -1.63750430 |
| C | 6.46980116  | 1.18974002  | -0.25832031 |
| C | 5.15753630  | 1.29141125  | 0.24600459  |
| C | -1.69173125 | 0.77908382  | 4.35894211  |
| C | -0.89444378 | 1.70062641  | 3.40852060  |
| C | 0.01821454  | 2.65871720  | 4.22546135  |
| C | 5.44173603  | -0.16359630 | 2.31442420  |
| C | 4.89913768  | 1.17520128  | 1.75131541  |
| C | 5.50019853  | 2.38444850  | 2.51661965  |
| C | -4.11551914 | -1.13976848 | -0.67254645 |
| C | -4.49235256 | -1.10378267 | -2.03863048 |
| C | -5.85811296 | -0.86589823 | -2.31675977 |
| C | -6.78974691 | -0.67029225 | -1.28939799 |
| C | -6.38029829 | -0.71138772 | 0.05444495  |
| C | -5.03366537 | -0.94391783 | 0.39318093  |
| C | -3.45164330 | -0.06473048 | -4.11720772 |
| C | -3.52135072 | -1.31617482 | -3.20449363 |
| C | -3.90748755 | -2.57549372 | -4.02528132 |
| C | 1.87270906  | -0.92601424 | 4.07840065  |
| C | 0.98699260  | -1.85566776 | 3.21691210  |
| C | 0.07253320  | -2.73394945 | 4.11729481  |
| C | 1.32844173  | -3.04197614 | 0.95909124  |
| C | 1.79394070  | -2.75328375 | 2.27720468  |
| C | 2.95014292  | -3.40098113 | 2.75082785  |
| C | 3.64772532  | -4.31496430 | 1.94667593  |
| C | 3.18358778  | -4.58862840 | 0.65375240  |
| C | 2.02697546  | -3.97351260 | 0.12573208  |
| C | -5.32559634 | -0.04147283 | 2.77878386  |
| C | -4.59966069 | -1.05129471 | 1.85896022  |
| C | -4.81192592 | -2.50269256 | 2.37486012  |
| C | 2.78272413  | -4.05985837 | -2.30783684 |
| C | 1.62617588  | -4.33169757 | -1.31255286 |
| C | 1.15942331  | -5.80953406 | -1.41133813 |
| H | 0.74007346  | 4.13095287  | 0.85449418  |
| H | 2.88334721  | 3.65191018  | -0.07732671 |
| H | -2.84069151 | -3.35392106 | -0.72154273 |
| H | -0.78734454 | -4.14015846 | 0.00875655  |
| H | -3.93543173 | 4.82988763  | 0.16102560  |
| H | -4.68953740 | 4.33782492  | 2.47202337  |
| H | -3.32362838 | 2.87558628  | 3.93955939  |
| H | -0.88002157 | 3.36990325  | -1.46105243 |
| H | 2.22903378  | 1.82527453  | -2.59690756 |
| H | -3.73807439 | 4.32264167  | -2.01318986 |

|   |             |             |             |
|---|-------------|-------------|-------------|
| H | -3.17193043 | 2.63614633  | -2.06300109 |
| H | -2.49643323 | 3.83022532  | -3.18515635 |
| H | -2.13494555 | 6.16474239  | -1.01412687 |
| H | -0.99475946 | 5.71756115  | -2.30071130 |
| H | -0.46486000 | 5.73661286  | -0.60464147 |
| H | 4.01320507  | 0.35628104  | -4.61444116 |
| H | 2.26700755  | 0.67571801  | -4.75692722 |
| H | 2.85063402  | -0.38521062 | -3.47556555 |
| H | 3.43919204  | 3.94221299  | -3.27896175 |
| H | 2.51980598  | 3.19158275  | -4.59982361 |
| H | 4.28730061  | 3.03019220  | -4.54501876 |
| H | 5.87244054  | 1.51164029  | -3.60807137 |
| H | 7.74097048  | 1.19221384  | -2.00611120 |
| H | 7.29583230  | 1.03252079  | 0.42980660  |
| H | -0.24420917 | 1.06354037  | 2.79537696  |
| H | 3.81634847  | 1.17426051  | 1.92477584  |
| H | -2.31718052 | 1.35107026  | 5.05620923  |
| H | -1.00454415 | 0.17539676  | 4.96351182  |
| H | -2.34017057 | 0.09853278  | 3.79543164  |
| H | -0.58732220 | 3.32567124  | 4.85349289  |
| H | 0.63241861  | 3.28737271  | 3.56775932  |
| H | 0.69260022  | 2.09092428  | 4.88002294  |
| H | 4.98209265  | -1.01937814 | 1.80759351  |
| H | 5.21595919  | -0.23983259 | 3.38606108  |
| H | 6.53052240  | -0.23755417 | 2.19697480  |
| H | 6.59147367  | 2.42082685  | 2.40464068  |
| H | 5.27421487  | 2.30784656  | 3.58822749  |
| H | 5.09556022  | 3.33689778  | 2.14913001  |
| H | -6.18617772 | -0.83113380 | -3.35197919 |
| H | -7.83387903 | -0.48632046 | -1.53173042 |
| H | -7.11289091 | -0.55894667 | 0.84099241  |
| H | -2.50858866 | -1.47669848 | -2.82811456 |
| H | 0.33407235  | -1.22875342 | 2.59872063  |
| H | -4.42644184 | 0.17176618  | -4.56604170 |
| H | -2.73465173 | -0.24249019 | -4.92827194 |
| H | -3.10361115 | 0.81021316  | -3.55732141 |
| H | -3.94565295 | -3.47388627 | -3.39412312 |
| H | -3.16030802 | -2.74614371 | -4.81018521 |
| H | -4.88773415 | -2.46290040 | -4.50823824 |
| H | 2.50772213  | -1.49081273 | 4.77345068  |
| H | 1.24757147  | -0.25767484 | 4.68353000  |
| H | 2.52424495  | -0.30993238 | 3.44666318  |
| H | -0.58819443 | -3.36585793 | 3.51005282  |
| H | -0.55520758 | -2.11019660 | 4.76684024  |
| H | 0.67474223  | -3.39478569 | 4.75538287  |
| H | 3.30262596  | -3.19945059 | 3.75859661  |
| H | 4.53912967  | -4.81029927 | 2.32475424  |
| H | 3.73107980  | -5.29240121 | 0.03203826  |
| H | -3.52918112 | -0.82380628 | 1.91097364  |
| H | 0.81337815  | -3.67924844 | -1.63427801 |
| H | -6.39872790 | -0.25840047 | 2.85991739  |
| H | -5.20388507 | 0.98395184  | 2.41204120  |



|    |             |             |             |
|----|-------------|-------------|-------------|
| H  | -4.90640008 | -0.09378407 | 3.79206877  |
| H  | -4.46481220 | -2.59568048 | 3.41261739  |
| H  | -4.26132852 | -3.23214193 | 1.76726214  |
| H  | -5.87563079 | -2.77440297 | 2.34533297  |
| H  | 3.07989419  | -3.00780537 | -2.25768899 |
| H  | 2.44350940  | -4.26212923 | -3.33241169 |
| H  | 3.66058635  | -4.69078021 | -2.11122224 |
| H  | 0.31526484  | -6.02053725 | -0.73932023 |
| H  | 1.96843175  | -6.50432823 | -1.14719498 |
| H  | 0.84255877  | -6.03677150 | -2.43803818 |
| O  | 0.01889181  | 1.52165029  | -2.03356152 |
| O  | -0.56601870 | -1.53495176 | -2.18191903 |
| O  | -1.98708062 | -0.25586935 | 0.03897818  |
| Zr | 0.00474137  | 0.08398484  | -0.89116603 |

$\eta^2$ -Ozone Complex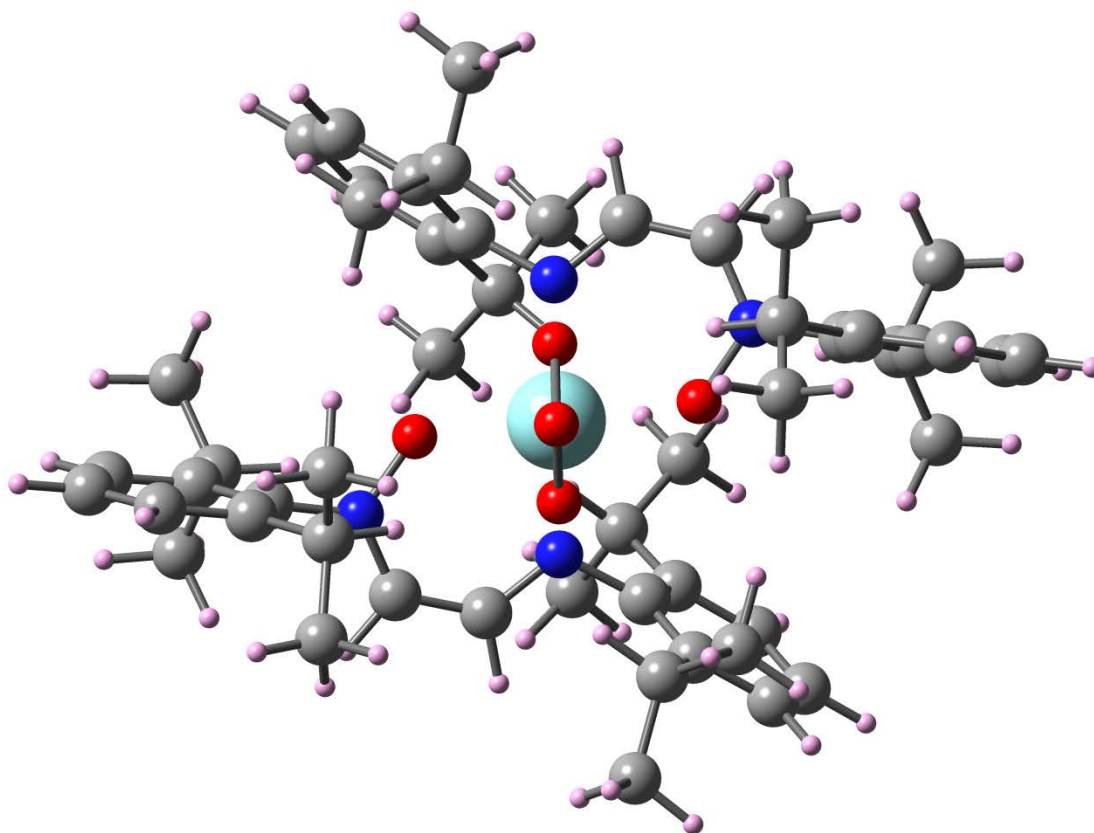Fig. S55: NCCNO  $\eta^2$ -Ozone Complex

| SCF          | $E_{ZP}$     | H            | G            |
|--------------|--------------|--------------|--------------|
| -2666.202370 | -2665.052570 | -2664.982028 | -2665.162667 |

|    |             |             |             |
|----|-------------|-------------|-------------|
| Zr | 0.00247200  | 0.05856200  | -0.44484000 |
| O  | -2.07480700 | 0.22496000  | -0.10330500 |
| O  | 2.09075500  | -0.20156400 | -0.10195100 |
| O  | 0.03434200  | 1.37679400  | -2.08767100 |
| N  | 0.00207100  | -2.06991600 | 0.36331400  |
| N  | 2.89012200  | -1.30708100 | -0.34577900 |
| N  | -0.00625400 | 1.92311800  | 0.83558300  |
| N  | -2.89857400 | 1.33795100  | -0.01330100 |
| C  | 1.07344200  | -2.89769400 | 0.17927000  |
| C  | 2.39282700  | -2.55015000 | -0.16125400 |
| C  | -1.09568000 | 2.75275800  | 0.90891800  |
| C  | -2.41413300 | 2.48995500  | 0.51081700  |
| C  | -1.22767600 | -2.79996800 | 0.70831400  |
| C  | -1.64466100 | -2.82557400 | 2.06911500  |
| C  | -2.79199400 | -3.57129800 | 2.40907100  |
| C  | -3.51802300 | -4.27355300 | 1.43654300  |

|   |             |             |             |
|---|-------------|-------------|-------------|
| C | -3.09148000 | -4.24346900 | 0.10293100  |
| C | -1.94430100 | -3.52031800 | -0.29134100 |
| C | -1.73870200 | -1.30222300 | 4.12379900  |
| C | -0.84392500 | -2.14728600 | 3.18345300  |
| C | -0.04545400 | -3.20641200 | 3.99212900  |
| C | 5.52564700  | 0.24069900  | 2.41952200  |
| C | 5.00242900  | -1.00293700 | 1.65822800  |
| C | 5.61250700  | -2.30565000 | 2.24273600  |
| C | 4.24215500  | -1.04472600 | -0.81173700 |
| C | 5.27041800  | -0.90133100 | 0.15439600  |
| C | 6.58096000  | -0.68330600 | -0.31865100 |
| C | 6.84546000  | -0.59850700 | -1.69478800 |
| C | 5.80371400  | -0.72783800 | -2.62654600 |
| C | 4.47442900  | -0.94943400 | -2.20822400 |
| C | -2.65981800 | -2.99405700 | -2.67434300 |
| C | -1.53757000 | -3.56285600 | -1.76875100 |
| C | -1.15472200 | -5.00183400 | -2.20620300 |
| C | 3.35008000  | 0.03621100  | -4.28093900 |
| C | 3.35568800  | -1.11136800 | -3.24039300 |
| C | 3.46287600  | -2.48971400 | -3.94829200 |
| C | 1.22384600  | 2.56428500  | 1.32451500  |
| C | 1.92219000  | 3.49830200  | 0.50520300  |
| C | 3.07326000  | 4.12064300  | 1.03602000  |
| C | 3.52082700  | 3.84917500  | 2.33544900  |
| C | 2.81170800  | 2.94042300  | 3.13368700  |
| C | 1.66112300  | 2.28443200  | 2.64946200  |
| C | 2.58975100  | 3.57720700  | -1.95119700 |
| C | 1.48027300  | 3.87782700  | -0.91213100 |
| C | 1.04956300  | 5.36732700  | -0.98438000 |
| C | -5.58809100 | -0.86367300 | 2.25045100  |
| C | -5.01781400 | 0.51314800  | 1.82715600  |
| C | -5.58766500 | 1.64410100  | 2.72579200  |
| C | -4.24469700 | 1.19974000  | -0.54005400 |
| C | -5.27932500 | 0.80900400  | 0.34810700  |
| C | -6.58746100 | 0.72750800  | -0.17221000 |
| C | -6.84385800 | 1.00676700  | -1.52411000 |
| C | -5.79620000 | 1.37168100  | -2.38403700 |
| C | -4.46944900 | 1.47354700  | -1.91418300 |
| C | 1.80483500  | 0.29908300  | 4.25246500  |
| C | 0.88747500  | 1.35591600  | 3.58862300  |
| C | 0.13238300  | 2.18197900  | 4.66565500  |
| C | -3.31598900 | 1.03316200  | -4.14939400 |
| C | -3.34503400 | 1.89686600  | -2.86347700 |
| C | -3.46969600 | 3.40344500  | -3.21926100 |
| H | 0.90201000  | -3.96941400 | 0.27499900  |
| H | 3.10638000  | -3.34964600 | -0.32163100 |
| H | -0.93177800 | 3.75861800  | 1.29362900  |
| H | -3.14276100 | 3.28766500  | 0.59287800  |
| H | -3.11448400 | -3.61169200 | 3.44634000  |
| H | -4.40072400 | -4.84345100 | 1.71729600  |
| H | -3.65210000 | -4.79174700 | -0.64989800 |
| H | -0.11631700 | -1.47458400 | 2.71730500  |

|   |             |             |             |
|---|-------------|-------------|-------------|
| H | 3.91830200  | -1.04279700 | 1.81204300  |
| H | -2.46364800 | -1.92525800 | 4.66259900  |
| H | -2.29696600 | -0.54358000 | 3.56121800  |
| H | -1.12583200 | -0.79006200 | 4.87591600  |
| H | -0.72334300 | -3.91969000 | 4.47976700  |
| H | 0.56058200  | -2.72554000 | 4.77147200  |
| H | 0.62785700  | -3.77628700 | 3.33929000  |
| H | 6.61687200  | 0.33258600  | 2.34203900  |
| H | 5.27331100  | 0.16231300  | 3.48537000  |
| H | 5.07265100  | 1.15878300  | 2.02992400  |
| H | 5.21478700  | -3.19710900 | 1.74037300  |
| H | 5.38387600  | -2.38733100 | 3.31360200  |
| H | 6.70453300  | -2.31649700 | 2.12876200  |
| H | 7.39595500  | -0.57392200 | 0.39205800  |
| H | 7.86246500  | -0.42809200 | -2.04060800 |
| H | 6.02096000  | -0.65123700 | -3.68822400 |
| H | -0.66818300 | -2.92255700 | -1.92915000 |
| H | 2.38715000  | -1.07981100 | -2.73350400 |
| H | -3.56830600 | -3.61098300 | -2.63567000 |
| H | -2.31552800 | -2.95661300 | -3.71575300 |
| H | -2.92086600 | -1.97550400 | -2.36721800 |
| H | -2.00289000 | -5.69341800 | -2.11193000 |
| H | -0.33033000 | -5.40211900 | -1.60035500 |
| H | -0.83544800 | -5.00222700 | -3.25681600 |
| H | 3.28851400  | 1.01378100  | -3.78963600 |
| H | 2.47110800  | -0.06289300 | -4.92826800 |
| H | 4.24687300  | 0.02124500  | -4.91588700 |
| H | 4.40641600  | -2.58141900 | -4.50377100 |
| H | 2.63430700  | -2.60913400 | -4.65756500 |
| H | 3.41318600  | -3.31716000 | -3.22794600 |
| H | 3.61952500  | 4.83083600  | 0.42023100  |
| H | 4.40629800  | 4.34600000  | 2.72518200  |
| H | 3.15025700  | 2.74406600  | 4.14792800  |
| H | 0.62200000  | 3.26808100  | -1.20088300 |
| H | -3.93353400 | 0.47456700  | 1.98213200  |
| H | 3.48057100  | 4.20064400  | -1.79179200 |
| H | 2.21353700  | 3.77089800  | -2.96374900 |
| H | 2.88959800  | 2.52506500  | -1.89860200 |
| H | 0.22980300  | 5.58468500  | -0.28631800 |
| H | 0.70577100  | 5.61015100  | -1.99861600 |
| H | 1.88259800  | 6.04059000  | -0.74072500 |
| H | -6.68293700 | -0.89069300 | 2.17209000  |
| H | -5.32481800 | -1.07267400 | 3.29582700  |
| H | -5.17670000 | -1.66712700 | 1.62982100  |
| H | -5.15654600 | 2.61994700  | 2.46735000  |
| H | -5.36534900 | 1.44221700  | 3.78203500  |
| H | -6.67772800 | 1.72069100  | 2.61808400  |
| H | -7.40682000 | 0.43917800  | 0.48092100  |
| H | -7.85918800 | 0.93655500  | -1.90773100 |
| H | -6.00707600 | 1.57711800  | -3.42986400 |
| H | 0.13540500  | 0.82411700  | 2.99593800  |
| H | -2.38015800 | 1.75660500  | -2.36814200 |

|   |             |             |             |
|---|-------------|-------------|-------------|
| H | 2.55487800  | 0.76510200  | 4.90408000  |
| H | 2.33524500  | -0.29176700 | 3.49559100  |
| H | 1.21380000  | -0.38642400 | 4.87258900  |
| H | -0.45034300 | 1.52346500  | 5.32351700  |
| H | -0.55728700 | 2.89869700  | 4.20206100  |
| H | 0.83641600  | 2.74888400  | 5.28936100  |
| H | -3.23819200 | -0.03249400 | -3.90660500 |
| H | -2.43837000 | 1.29933700  | -4.74985000 |
| H | -4.21281600 | 1.18593700  | -4.76553800 |
| H | -3.43916100 | 4.03303300  | -2.32000500 |
| H | -4.41048100 | 3.61270800  | -3.74673500 |
| H | -2.63853000 | 3.70234000  | -3.87032200 |
| O | 0.02951800  | 0.32573400  | -3.17041900 |
| O | 0.01926700  | -0.91525300 | -2.31453300 |

## 5.5 Structures with six oxygen atoms

## Bisperoxo Complex (spiro conformation)

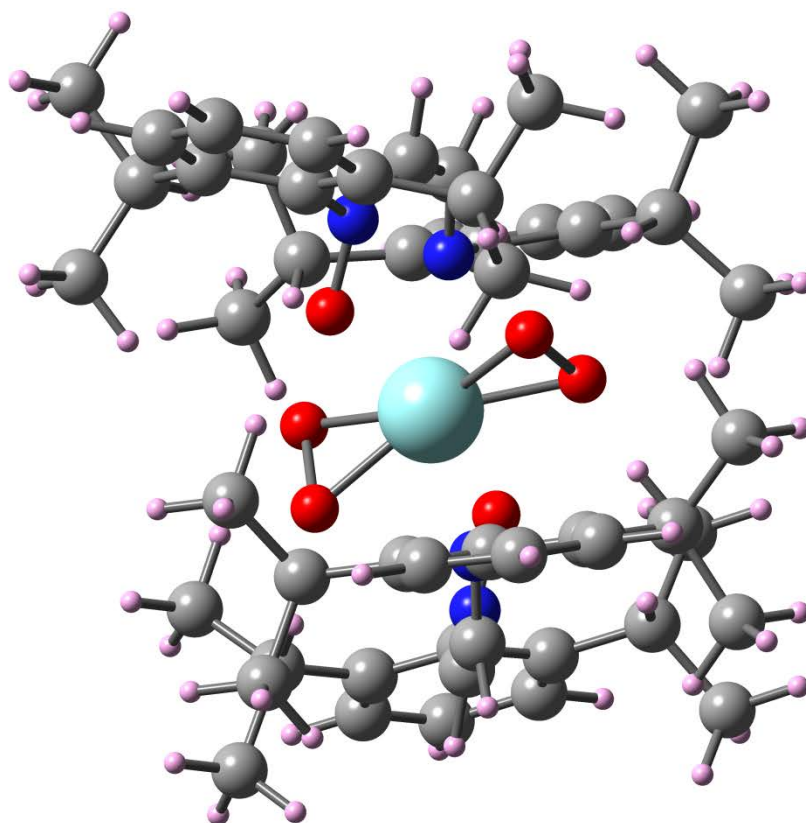

Fig. S56: NCCNO Bisperoxo Complex (spiro conformation)

| SCF            | $E_{ZP}$     | H            | G            |
|----------------|--------------|--------------|--------------|
| -2741.41393279 | -2740.259005 | -2740.187597 | -2740.367839 |

|    |             |             |             |
|----|-------------|-------------|-------------|
| Zr | -0.00036100 | -0.00889700 | 0.06173200  |
| O  | -2.24720300 | -0.53267700 | -0.13891900 |
| O  | 2.00302000  | 0.79170900  | 0.76165200  |
| O  | -0.38764000 | -0.54957500 | 2.02992100  |
| O  | -0.67871000 | 0.93813600  | 1.81735600  |
| N  | -0.01214900 | 2.22204200  | -0.86526000 |
| N  | 2.85821100  | 1.49082000  | -0.01447600 |
| N  | -0.02081100 | -2.44646000 | 0.14715000  |
| N  | -2.87788900 | -1.43749600 | 0.61263600  |
| C  | 1.11596600  | 2.68739200  | -1.34322800 |
| C  | 2.46296200  | 2.29235900  | -0.99260000 |
| C  | -1.04605500 | -3.12003100 | 0.58900400  |
| C  | -2.35829600 | -2.60822300 | 0.94248300  |
| C  | -1.23162100 | 2.92450300  | -1.25536300 |
| C  | -1.70031700 | 2.87463100  | -2.59943200 |

|   |             |             |             |
|---|-------------|-------------|-------------|
| C | -2.89695100 | 3.56551300  | -2.89613900 |
| C | -3.59313000 | 4.28461300  | -1.91614300 |
| C | -3.09171000 | 4.34378500  | -0.60576500 |
| C | -1.90432700 | 3.67555200  | -0.24837900 |
| C | -1.90857200 | 1.08854800  | -4.40910700 |
| C | -0.98305800 | 2.13140100  | -3.73438800 |
| C | -0.42870800 | 3.13129900  | -4.78540900 |
| C | 5.02630200  | -1.55518400 | -1.87079600 |
| C | 4.62732700  | -0.05935600 | -1.82009900 |
| C | 5.16858300  | 0.68795100  | -3.06946900 |
| C | 4.27629800  | 1.35239400  | 0.33220700  |
| C | 5.11935000  | 0.61099500  | -0.53123700 |
| C | 6.47678200  | 0.51018600  | -0.15500800 |
| C | 6.94852900  | 1.09753900  | 1.02842700  |
| C | 6.07483500  | 1.80895200  | 1.86743000  |
| C | 4.71262800  | 1.95915200  | 1.53719000  |
| C | -2.36050900 | 4.00808500  | 2.26106800  |
| C | -1.30066400 | 3.84918900  | 1.14866600  |
| C | -0.33133000 | 5.06541300  | 1.15775200  |
| C | 3.43054800  | 1.88172200  | 3.72224700  |
| C | 3.76851200  | 2.72995700  | 2.46640500  |
| C | 4.34281500  | 4.11302800  | 2.86425300  |
| C | 1.17654300  | -3.23965200 | -0.15396100 |
| C | 2.09458200  | -3.51088200 | 0.89489900  |
| C | 3.19831000  | -4.33849100 | 0.59400900  |
| C | 3.38272600  | -4.86745900 | -0.69169700 |
| C | 2.47001700  | -4.56014900 | -1.71300300 |
| C | 1.35206600  | -3.73478300 | -1.47303100 |
| C | 3.17591500  | -2.20300000 | 2.79938800  |
| C | 1.91702200  | -2.96811800 | 2.31866900  |
| C | 1.55932200  | -4.11099100 | 3.30640900  |
| C | -5.15109300 | -0.09319100 | -2.31702300 |
| C | -4.97148500 | -1.36607400 | -1.44865500 |
| C | -5.86365000 | -2.52552100 | -1.96314700 |
| C | -4.24746600 | -1.08564500 | 1.02714200  |
| C | -5.24784000 | -1.05275000 | 0.02523000  |
| C | -6.54989100 | -0.70741600 | 0.44091700  |
| C | -6.82512000 | -0.41161900 | 1.78572200  |
| C | -5.80201500 | -0.44706500 | 2.74504900  |
| C | -4.47525300 | -0.77694800 | 2.39159100  |
| C | 1.07184300  | -2.93577400 | -3.88276900 |
| C | 0.36060300  | -3.43076700 | -2.60026000 |
| C | -0.52936700 | -4.66797000 | -2.89741500 |
| C | -3.33305100 | 0.53535200  | 4.25865900  |
| C | -3.37625100 | -0.79214400 | 3.46237000  |
| C | -3.57051200 | -1.99715400 | 4.42307400  |
| H | 1.08958700  | 3.51830800  | -2.05327500 |
| H | 3.26585000  | 2.78919200  | -1.52411200 |
| H | -0.95262100 | -4.20010400 | 0.73463500  |
| H | -3.01489600 | -3.26658100 | 1.49710400  |
| H | -3.28376700 | 3.53473200  | -3.91176200 |
| H | -4.51377800 | 4.80440000  | -2.17184700 |

|   |             |             |             |
|---|-------------|-------------|-------------|
| H | -3.62524000 | 4.91894900  | 0.14482400  |
| H | -0.15396200 | 1.55446100  | -3.31846000 |
| H | 3.53291100  | -0.02808200 | -1.85771200 |
| H | -2.79166800 | 1.55372800  | -4.86919400 |
| H | -2.23716600 | 0.34883100  | -3.67262700 |
| H | -1.35728800 | 0.55596800  | -5.19547800 |
| H | -1.23779900 | 3.68966800  | -5.27580500 |
| H | 0.12723300  | 2.59152000  | -5.56372100 |
| H | 0.24956300  | 3.86773600  | -4.33161800 |
| H | 6.11528900  | -1.68900900 | -1.92581900 |
| H | 4.58466100  | -2.02399100 | -2.75868800 |
| H | 4.65491400  | -2.09446800 | -0.99291200 |
| H | 4.86545400  | 1.74371400  | -3.07968800 |
| H | 4.78269200  | 0.21858500  | -3.98316600 |
| H | 6.26591900  | 0.65709100  | -3.10751700 |
| H | 7.16307300  | -0.04500400 | -0.78810800 |
| H | 7.99689300  | 0.99848800  | 1.30000800  |
| H | 6.45458500  | 2.25519500  | 2.78208500  |
| H | -0.72110300 | 2.95276200  | 1.39128200  |
| H | 2.82049200  | 2.90359000  | 1.94536200  |
| H | -2.88729500 | 4.97096500  | 2.20093600  |
| H | -1.87211100 | 3.95765600  | 3.24231600  |
| H | -3.10159200 | 3.20246500  | 2.21181400  |
| H | -0.86766300 | 5.99668500  | 0.92824200  |
| H | 0.47212500  | 4.95066100  | 0.41807300  |
| H | 0.13279100  | 5.17249100  | 2.14760300  |
| H | 2.92978900  | 0.95298500  | 3.43264000  |
| H | 2.75356100  | 2.43998600  | 4.38168200  |
| H | 4.33834800  | 1.63560600  | 4.29021000  |
| H | 5.24698900  | 4.01787800  | 3.47921300  |
| H | 3.60118800  | 4.66608400  | 3.45485400  |
| H | 4.59564600  | 4.71540600  | 1.98185600  |
| H | 3.91435100  | -4.57219300 | 1.37793300  |
| H | 4.23558900  | -5.50993400 | -0.89862900 |
| H | 2.62636700  | -4.96368300 | -2.70994000 |
| H | 1.09574800  | -2.24459400 | 2.33245200  |
| H | -3.92728200 | -1.67670400 | -1.56045200 |
| H | 4.05711600  | -2.85590700 | 2.86044500  |
| H | 2.99676600  | -1.78566600 | 3.79889300  |
| H | 3.40505000  | -1.37182700 | 2.12312800  |
| H | 0.63862400  | -4.63073500 | 3.00710000  |
| H | 1.40680600  | -3.70535800 | 4.31515200  |
| H | 2.36153800  | -4.85975200 | 3.35787900  |
| H | -6.18260700 | 0.28039000  | -2.26578100 |
| H | -4.92311100 | -0.31755700 | -3.36696900 |
| H | -4.47767200 | 0.70370500  | -1.98393300 |
| H | -5.72805000 | -3.43493500 | -1.36302200 |
| H | -5.60684300 | -2.76146500 | -3.00396700 |
| H | -6.92855800 | -2.26094400 | -1.93573200 |
| H | -7.35113500 | -0.67036900 | -0.29202500 |
| H | -7.83685500 | -0.14791700 | 2.08467900  |
| H | -6.02796100 | -0.20293000 | 3.77907400  |



|   |             |             |             |
|---|-------------|-------------|-------------|
| H | -0.27909700 | -2.60102100 | -2.28438400 |
| H | -2.39388200 | -0.88085300 | 2.98675500  |
| H | 1.73963400  | -3.69543900 | -4.31273000 |
| H | 1.64617700  | -2.03119400 | -3.65840000 |
| H | 0.32286000  | -2.67986400 | -4.64391700 |
| H | -1.25915100 | -4.43053100 | -3.68306300 |
| H | -1.08333100 | -4.99441500 | -2.00570300 |
| H | 0.07400700  | -5.51928600 | -3.24186600 |
| H | -3.13965800 | 1.37699400  | 3.58755900  |
| H | -2.50845200 | 0.49692900  | 4.98115200  |
| H | -4.26300300 | 0.72260800  | 4.81329500  |
| H | -3.56784900 | -2.95726100 | 3.88777900  |
| H | -4.52157900 | -1.92553100 | 4.96847300  |
| H | -2.75746300 | -2.02028100 | 5.15959300  |
| O | 1.25165300  | -0.26173500 | -1.64533000 |
| O | -0.21470100 | -0.30666200 | -2.01519400 |

**Bisperoxo Complex (planar conformation 1 lower energy)**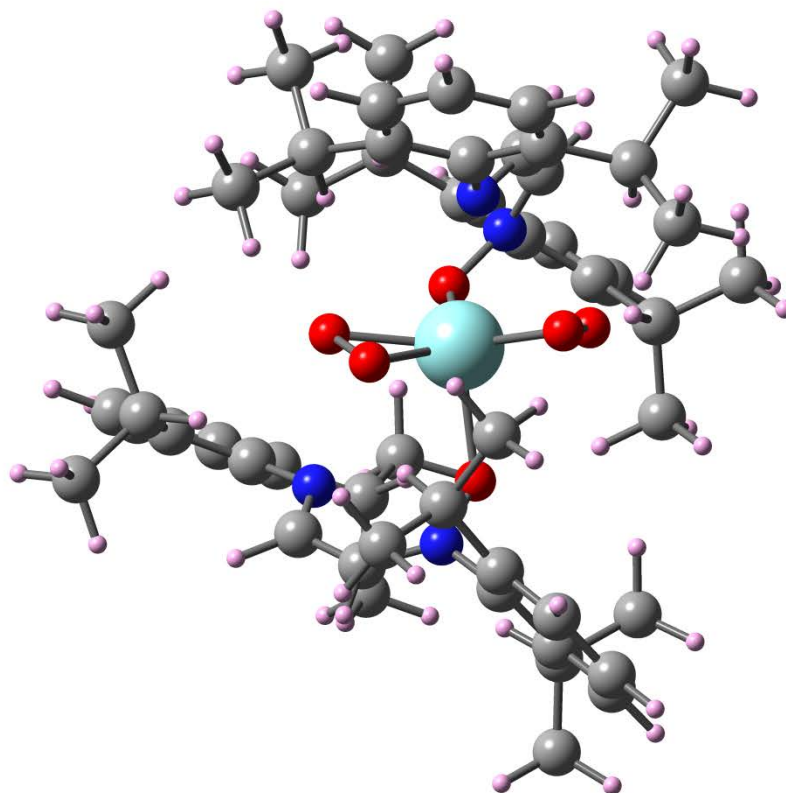

Fig. S57: NCCNO Bisperoxo Complex (planar conformation 1 lower energy)

| SCF           | $E_{ZP}$     | H            | G            |
|---------------|--------------|--------------|--------------|
| -2741.4044128 | -2740.250742 | -2740.178758 | -2740.362962 |

|    |             |             |             |
|----|-------------|-------------|-------------|
| Zr | -0.60405200 | -0.34960400 | -0.07366100 |
| O  | 1.55470500  | -0.81136600 | -0.39888200 |
| O  | -1.06402900 | 1.71692200  | -0.60810300 |
| O  | -2.09488900 | -1.12327700 | -1.27761600 |
| N  | 0.74448000  | 2.51501300  | 1.47593000  |
| N  | -1.86859000 | 2.62316000  | 0.01102900  |
| N  | -0.54768600 | -2.82754500 | 0.05651400  |
| N  | 2.00231400  | -1.73728900 | -1.28691200 |
| C  | -0.33979900 | 3.08239300  | 1.92635900  |
| C  | -1.56265600 | 3.19809200  | 1.16005800  |
| C  | 0.22626600  | -3.42842500 | -0.81468300 |
| C  | 1.38644600  | -2.88764800 | -1.49392700 |
| C  | 1.96834100  | 2.50556000  | 2.18991200  |
| C  | 2.08221300  | 2.20488000  | 3.58598400  |
| C  | 3.36539900  | 2.27888200  | 4.16686600  |
| C  | 4.49884500  | 2.62022300  | 3.41455700  |
| C  | 4.37924200  | 2.85829500  | 2.03420500  |
| C  | 3.12923000  | 2.78816600  | 1.39544000  |

|   |             |             |             |
|---|-------------|-------------|-------------|
| C | 1.23050400  | 0.39373400  | 5.16127000  |
| C | 0.90744200  | 1.73360400  | 4.45323100  |
| C | 0.50160700  | 2.81156700  | 5.49447300  |
| C | -5.00716900 | 0.05615600  | 0.41197300  |
| C | -4.44120400 | 1.41588600  | 0.90083900  |
| C | -5.30186000 | 1.99556000  | 2.05374900  |
| C | -3.10592500 | 2.95761500  | -0.70929200 |
| C | -4.33022200 | 2.40328500  | -0.26554100 |
| C | -5.48986900 | 2.77824000  | -0.97953700 |
| C | -5.41736400 | 3.63607700  | -2.08621000 |
| C | -4.17760800 | 4.13767300  | -2.51638900 |
| C | -2.98807100 | 3.80760900  | -1.83726400 |
| C | 4.20606300  | 2.66144100  | -0.94006900 |
| C | 2.98289700  | 3.08897500  | -0.09816700 |
| C | 2.67937600  | 4.59767900  | -0.32025700 |
| C | -1.23975300 | 3.53278900  | -3.63356100 |
| C | -1.63679300 | 4.31293200  | -2.35082200 |
| C | -1.63048100 | 5.84209700  | -2.59782900 |
| C | -1.62783200 | -3.62200300 | 0.62605400  |
| C | -2.60343800 | -4.23740000 | -0.21962900 |
| C | -3.61175300 | -5.00363100 | 0.40324100  |
| C | -3.66178900 | -5.16676700 | 1.79417000  |
| C | -2.69256200 | -4.55381700 | 2.60127600  |
| C | -1.66339400 | -3.77106400 | 2.04174300  |
| C | -4.01322000 | -3.53318300 | -2.22838900 |
| C | -2.65154500 | -4.09804200 | -1.74963600 |
| C | -2.35778500 | -5.45651400 | -2.44392800 |
| C | 5.21859600  | -1.22117200 | 1.11357600  |
| C | 4.51509700  | -2.19586700 | 0.13410200  |
| C | 5.20073000  | -3.58805200 | 0.14585200  |
| C | 3.24932200  | -1.39736100 | -1.97913000 |
| C | 4.46373200  | -1.62112200 | -1.28528300 |
| C | 5.65545800  | -1.30138000 | -1.96756900 |
| C | 5.62305800  | -0.77710300 | -3.27026600 |
| C | 4.39785800  | -0.55293900 | -3.91656700 |
| C | 3.17195100  | -0.85117200 | -3.28278800 |
| C | -1.11062600 | -2.61219000 | 4.25749200  |
| C | -0.56256700 | -3.20379100 | 2.93923500  |
| C | 0.50587100  | -4.29713300 | 3.22089000  |
| C | 1.70922800  | 0.92758300  | -4.35347300 |
| C | 1.84717600  | -0.57614600 | -4.00140800 |
| C | 1.70655400  | -1.45391100 | -5.27300000 |
| H | -0.38437600 | 3.59200600  | 2.89401000  |
| H | -2.32569100 | 3.86933600  | 1.54070600  |
| H | 0.03759700  | -4.47258100 | -1.07122400 |
| H | 1.86152900  | -3.53039700 | -2.22637400 |
| H | 3.47997900  | 2.05523700  | 5.22432300  |
| H | 5.47219500  | 2.68278500  | 3.89599100  |
| H | 5.26679900  | 3.09465600  | 1.45493300  |
| H | 0.05334900  | 1.51760900  | 3.80517200  |
| H | -3.44627700 | 1.20488800  | 1.30556600  |
| H | 2.07244300  | 0.48271700  | 5.86057800  |

|   |             |             |             |
|---|-------------|-------------|-------------|
| H | 1.46372700  | -0.37588600 | 4.41809100  |
| H | 0.35472300  | 0.05798800  | 5.73143400  |
| H | 1.32119200  | 3.00900900  | 6.19892500  |
| H | -0.36676700 | 2.47206600  | 6.07470300  |
| H | 0.24297300  | 3.76898000  | 5.02108800  |
| H | -6.03517400 | 0.15565600  | 0.03679100  |
| H | -5.01371700 | -0.65980700 | 1.24301700  |
| H | -4.38194700 | -0.35951500 | -0.38626900 |
| H | -4.89267500 | 2.94272300  | 2.43243400  |
| H | -5.33278800 | 1.28290600  | 2.88751600  |
| H | -6.33534200 | 2.18344300  | 1.73274600  |
| H | -6.45227100 | 2.37882800  | -0.67224200 |
| H | -6.32445200 | 3.90445400  | -2.62262200 |
| H | -4.13401300 | 4.78712800  | -3.38611100 |
| H | 2.11024200  | 2.52656200  | -0.44947700 |
| H | -0.86826200 | 4.09734200  | -1.59973600 |
| H | 5.09602700  | 3.26480800  | -0.71414900 |
| H | 3.98534100  | 2.79626900  | -2.00726800 |
| H | 4.45568400  | 1.60578500  | -0.78003000 |
| H | 3.51375300  | 5.21978000  | 0.03199600  |
| H | 1.77521000  | 4.90626600  | 0.21869200  |
| H | 2.52695200  | 4.80481900  | -1.38845100 |
| H | -1.20009700 | 2.45724600  | -3.43053500 |
| H | -0.25184800 | 3.85854400  | -3.98615100 |
| H | -1.96449000 | 3.70846700  | -4.44003100 |
| H | -2.32278000 | 6.12875000  | -3.39976600 |
| H | -0.62618300 | 6.16801300  | -2.89848800 |
| H | -1.91358300 | 6.39714600  | -1.69392200 |
| H | -4.37429800 | -5.47053000 | -0.21475300 |
| H | -4.44968300 | -5.76602700 | 2.24493700  |
| H | -2.73172400 | -4.68662000 | 3.67816900  |
| H | -1.90668200 | -3.36595300 | -2.07117100 |
| H | 3.49172700  | -2.32321500 | 0.50326200  |
| H | -4.85089900 | -4.19704600 | -1.97537100 |
| H | -3.99941900 | -3.40893000 | -3.31971100 |
| H | -4.18515400 | -2.54964500 | -1.78211500 |
| H | -1.38359800 | -5.87183700 | -2.14838900 |
| H | -2.35836200 | -5.33141200 | -3.53510900 |
| H | -3.12002300 | -6.20580400 | -2.19132900 |
| H | 6.26363500  | -1.04409300 | 0.82644600  |
| H | 5.21618700  | -1.64268500 | 2.12697100  |
| H | 4.70199600  | -0.25562700 | 1.14895500  |
| H | 4.68772000  | -4.29561900 | -0.51890100 |
| H | 5.19112100  | -4.00548200 | 1.16092500  |
| H | 6.24687200  | -3.52089300 | -0.18006500 |
| H | 6.61174000  | -1.46274000 | -1.47737200 |
| H | 6.55381100  | -0.53884200 | -3.77958900 |
| H | 4.38889900  | -0.13754900 | -4.92063900 |
| H | -0.07655200 | -2.37557600 | 2.41549900  |
| H | 1.00645600  | -0.82202600 | -3.34510100 |
| H | -1.58924500 | -3.36970700 | 4.89376400  |
| H | -1.83192800 | -1.81744700 | 4.03825100  |

|   |             |             |             |
|---|-------------|-------------|-------------|
| H | -0.28708400 | -2.17157400 | 4.83184400  |
| H | 1.32613400  | -3.88067400 | 3.82125100  |
| H | 0.93309100  | -4.69283900 | 2.28880700  |
| H | 0.07214600  | -5.14139500 | 3.77490000  |
| H | 1.78605100  | 1.55029900  | -3.45377300 |
| H | 0.72811000  | 1.11130300  | -4.80723900 |
| H | 2.48127300  | 1.25194600  | -5.06446900 |
| H | 1.77025800  | -2.52372300 | -5.03311600 |
| H | 2.48853600  | -1.22766200 | -6.01057300 |
| H | 0.73218700  | -1.27267700 | -5.74321600 |
| O | -1.65923100 | -0.14332300 | 1.68841300  |
| O | -0.13000500 | -0.18188100 | 1.95555800  |
| O | -0.81919400 | -0.94031200 | -2.10423400 |

**Bisperoxo Complex (planar conformation 2 higher energy)**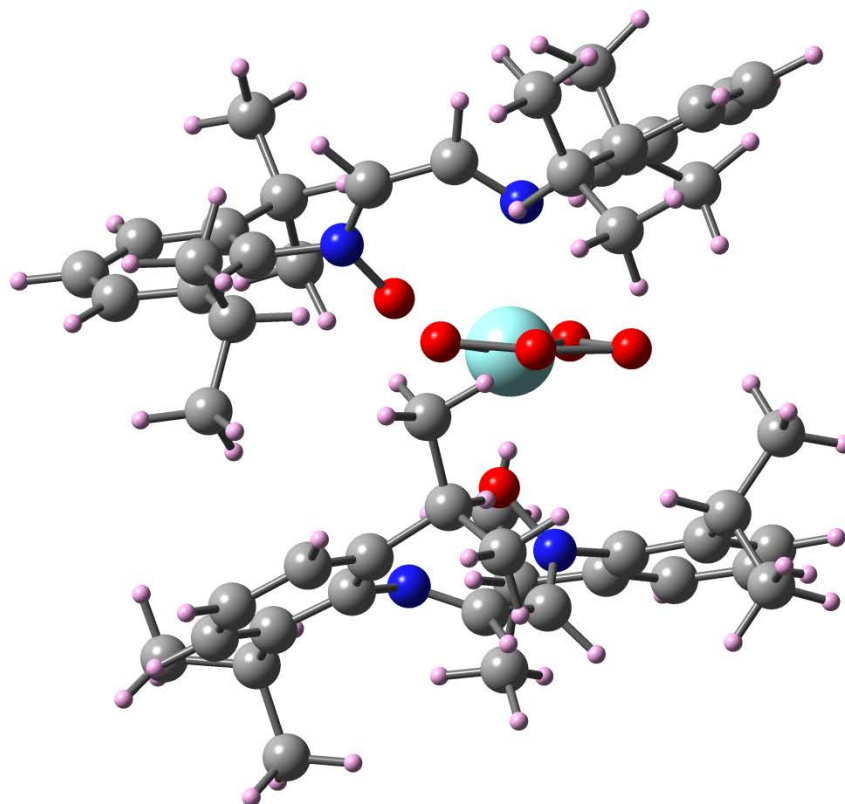

Fig. S58: NCCNO Bisperoxo Complex (planar conformation 2 higher energy)

| SCF          | E <sub>ZP</sub> | H            | G            |
|--------------|-----------------|--------------|--------------|
| -2741.399655 | -2740.246131    | -2740.174198 | -2740.357543 |

|    |             |             |             |
|----|-------------|-------------|-------------|
| Zr | 0.94355271  | -0.14377247 | -0.19758879 |
| O  | 0.64156836  | 1.87728907  | -1.13102052 |
| O  | -0.63437586 | -1.43867209 | -1.01327849 |
| O  | 2.26655164  | -0.61823478 | -1.72912551 |
| N  | -3.32077666 | -1.54082038 | 0.21861622  |
| N  | -0.80650181 | -2.78040818 | -1.02979620 |
| N  | 2.58868298  | 1.26097210  | 0.93592569  |
| N  | 0.50167335  | 3.02454068  | -0.42938319 |
| C  | -2.85555815 | -2.73814383 | 0.39678477  |
| C  | -1.82343058 | -3.36051458 | -0.42496332 |
| C  | 2.24407260  | 2.47854202  | 1.26285332  |
| C  | 1.19094391  | 3.28109971  | 0.66946475  |
| C  | -4.31840889 | -0.99339757 | 1.07204701  |
| C  | -4.16496441 | -0.93548863 | 2.49260302  |
| C  | -5.21747791 | -0.35743382 | 3.23522500  |
| C  | -6.37169048 | 0.14231574  | 2.61486859  |

|   |             |             |             |
|---|-------------|-------------|-------------|
| C | -6.48391078 | 0.11352744  | 1.21308270  |
| C | -5.46066592 | -0.43168641 | 0.41937348  |
| C | -2.25832050 | -0.20742029 | 4.02222184  |
| C | -2.89801705 | -1.38213779 | 3.23692470  |
| C | -3.19001169 | -2.58498406 | 4.17365748  |
| C | 2.50503347  | -4.33666824 | 1.04210421  |
| C | 1.06599650  | -4.53483867 | 0.49904976  |
| C | 0.46861691  | -5.87517723 | 1.00830478  |
| C | 0.18093787  | -3.59332372 | -1.76661639 |
| C | 1.03202829  | -4.45756601 | -1.03275603 |
| C | 1.90742740  | -5.26689530 | -1.78558798 |
| C | 1.94790581  | -5.18958045 | -3.18511323 |
| C | 1.11836546  | -4.28922891 | -3.87046672 |
| C | 0.21391925  | -3.46134247 | -3.17613819 |
| C | -6.30913390 | 0.71567812  | -1.72115985 |
| C | -5.57700554 | -0.49853945 | -1.10489160 |
| C | -6.26387353 | -1.82241550 | -1.54450393 |
| C | 0.24070770  | -1.36388593 | -4.57826451 |
| C | -0.65592339 | -2.46657133 | -3.95068137 |
| C | -1.52302278 | -3.16864442 | -5.02660483 |
| C | 3.74463517  | 0.69358122  | 1.62016867  |
| C | 4.88864659  | 0.37896945  | 0.83496865  |
| C | 6.01498702  | -0.14855989 | 1.49572766  |
| C | 6.00974902  | -0.36734924 | 2.88189732  |
| C | 4.86771568  | -0.05660970 | 3.63252985  |
| C | 3.70949229  | 0.48091822  | 3.02987370  |
| C | 5.59014189  | -0.44583486 | -1.48680270 |
| C | 4.95425531  | 0.69524665  | -0.66056947 |
| C | 5.70211658  | 2.03874970  | -0.88596253 |
| C | -3.47915616 | 2.70425763  | 0.65604909  |
| C | -2.12082782 | 3.40854076  | 0.89604969  |
| C | -2.19324974 | 4.33049770  | 2.14259284  |
| C | -0.43642713 | 4.00330309  | -0.99132437 |
| C | -1.68110303 | 4.19476985  | -0.34457002 |
| C | -2.54215766 | 5.16131107  | -0.90949800 |
| C | -2.18204911 | 5.86791083  | -2.06641932 |
| C | -0.94816907 | 5.62655711  | -2.69322158 |
| C | -0.03941610 | 4.68575887  | -2.16853273 |
| C | 2.04361083  | -0.49937283 | 4.69187059  |
| C | 2.48939351  | 0.76751733  | 3.91818411  |
| C | 2.77757960  | 1.93299841  | 4.90353871  |
| C | 1.05286819  | 3.59835117  | -4.17459617 |
| C | 1.29224458  | 4.41570311  | -2.87616449 |
| C | 2.07304097  | 5.72075373  | -3.17307868 |
| H | -3.26430472 | -3.41715035 | 1.15795485  |
| H | -1.84343348 | -4.44125045 | -0.51320114 |
| H | 2.80832153  | 3.01155816  | 2.03195315  |
| H | 0.99460959  | 4.24723040  | 1.11876050  |
| H | -5.12533801 | -0.29438064 | 4.31655424  |
| H | -7.17216807 | 0.56623088  | 3.21678258  |
| H | -7.37020752 | 0.52539002  | 0.73925856  |
| H | -2.13639849 | -1.69060417 | 2.51496886  |

|   |             |             |             |
|---|-------------|-------------|-------------|
| H | 0.46794028  | -3.71466298 | 0.91357686  |
| H | -2.95357471 | 0.22848811  | 4.75250905  |
| H | -1.91665023 | 0.56566794  | 3.32615173  |
| H | -1.37312284 | -0.56700884 | 4.56202346  |
| H | -3.91034336 | -2.31441822 | 4.95729698  |
| H | -2.26529510 | -2.91288858 | 4.66622152  |
| H | -3.60850517 | -3.43997810 | 3.62404672  |
| H | 3.15957854  | -5.17601591 | 0.77071385  |
| H | 2.48107322  | -4.27445678 | 2.13820033  |
| H | 2.93371458  | -3.41112435 | 0.64549659  |
| H | -0.57061252 | -6.02179431 | 0.68135291  |
| H | 0.48677370  | -5.90392246 | 2.10552798  |
| H | 1.05223164  | -6.72889778 | 0.63964175  |
| H | 2.58259075  | -5.94205693 | -1.26780442 |
| H | 2.63923656  | -5.81874418 | -3.74067350 |
| H | 1.17641691  | -4.22318506 | -4.95329833 |
| H | -4.55242893 | -0.51706545 | -1.49887270 |
| H | -1.33438926 | -1.96512750 | -3.25290348 |
| H | -7.37539124 | 0.73104139  | -1.45814340 |
| H | -6.24526152 | 0.67215612  | -2.81647414 |
| H | -5.86204215 | 1.66173598  | -1.39173250 |
| H | -7.29478595 | -1.86976051 | -1.16804198 |
| H | -5.72505901 | -2.69897991 | -1.16324137 |
| H | -6.29684805 | -1.89342259 | -2.64016544 |
| H | 0.88887216  | -0.91480101 | -3.81749018 |
| H | -0.38398908 | -0.58066406 | -5.02896644 |
| H | 0.88267256  | -1.78067245 | -5.36644951 |
| H | -0.90365836 | -3.65060006 | -5.79398017 |
| H | -2.16170487 | -2.43180899 | -5.53145174 |
| H | -2.17097065 | -3.93745044 | -4.58480746 |
| H | 6.90274917  | -0.38965254 | 0.91828484  |
| H | 6.88885911  | -0.77865608 | 3.37291309  |
| H | 4.86750935  | -0.24030729 | 4.70389829  |
| H | 3.93379747  | 0.79835923  | -1.03917944 |
| H | -1.39807247 | 2.61409092  | 1.11077594  |
| H | 6.64600073  | -0.61446593 | -1.23094150 |
| H | 5.54085670  | -0.19735631 | -2.55492856 |
| H | 5.02502201  | -1.37042603 | -1.33396130 |
| H | 5.22268212  | 2.86547386  | -0.34194418 |
| H | 5.71095226  | 2.29322759  | -1.95455004 |
| H | 6.74414231  | 1.97445368  | -0.54285053 |
| H | -4.29033968 | 3.42401265  | 0.48133308  |
| H | -3.74558997 | 2.10252875  | 1.53213413  |
| H | -3.42134070 | 2.02914750  | -0.20530036 |
| H | -1.22680916 | 4.80807265  | 2.35487186  |
| H | -2.47982945 | 3.74344980  | 3.02391305  |
| H | -2.93656368 | 5.12794899  | 2.00882501  |
| H | -3.50596661 | 5.34897396  | -0.44497894 |
| H | -2.86546422 | 6.60275017  | -2.48520755 |
| H | -0.68774838 | 6.17545574  | -3.59376045 |
| H | 1.63685911  | 1.03789901  | 3.28921832  |
| H | 1.92165597  | 3.79551999  | -2.22824022 |



|   |             |             |             |
|---|-------------|-------------|-------------|
| H | 2.82606074  | -0.86972604 | 5.36778055  |
| H | 1.77426738  | -1.28888521 | 3.98393459  |
| H | 1.15561463  | -0.27064256 | 5.29698298  |
| H | 1.88638822  | 2.14829114  | 5.50835251  |
| H | 3.06442466  | 2.85540662  | 4.37852564  |
| H | 3.59708186  | 1.68026389  | 5.58949195  |
| H | 0.56290644  | 2.64613557  | -3.94467000 |
| H | 2.00989820  | 3.38063909  | -4.66596315 |
| H | 0.42372289  | 4.15517795  | -4.88214781 |
| H | 2.24259437  | 6.30607965  | -2.25996035 |
| H | 1.54197249  | 6.36004155  | -3.88983546 |
| H | 3.05019707  | 5.47809199  | -3.60977449 |
| O | 0.57510624  | -0.58123916 | 1.78659858  |
| O | -0.24816215 | 0.65801811  | 1.38064929  |
| O | 2.42000429  | -1.52548082 | -0.46250982 |

**Bisperoxo Complex (butterfly conformation)**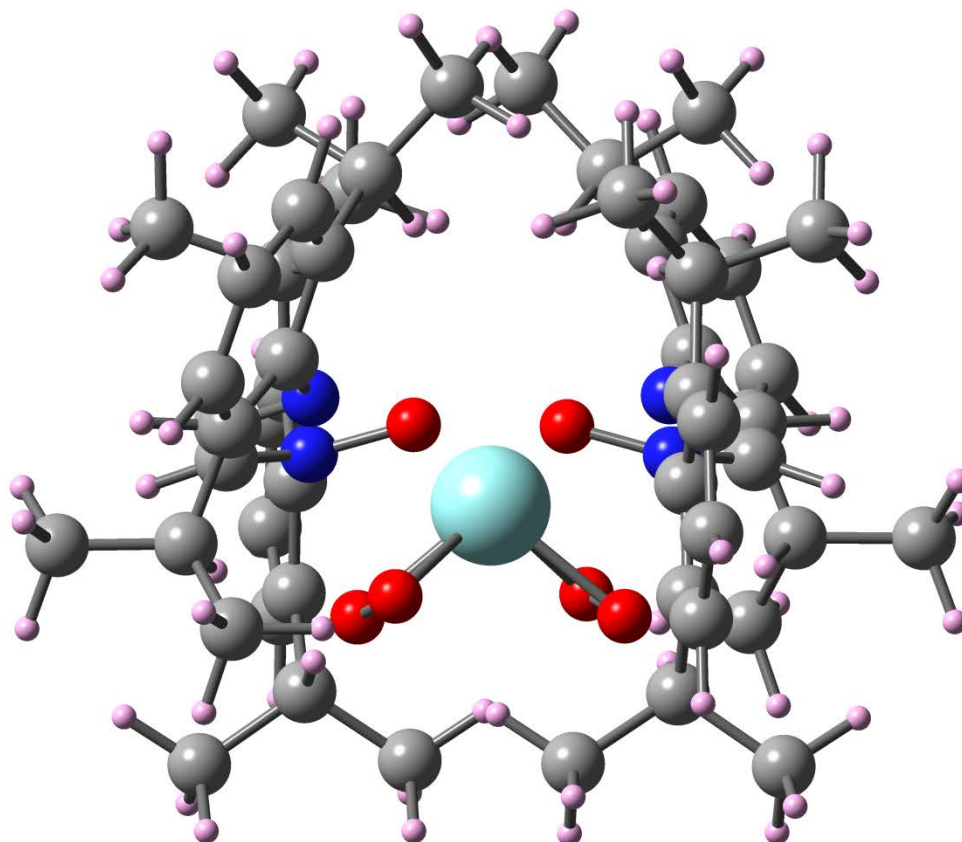

Fig. S59: NCCNO Bisperoxo Complex (butterfly conformation)

| SCF          | E <sub>ZP</sub> | H            | G            |
|--------------|-----------------|--------------|--------------|
| -2741.404045 | -2740.249500    | -2740.178212 | -2740.357924 |

|   |             |             |             |
|---|-------------|-------------|-------------|
| O | -1.96324127 | -0.45319935 | 0.12108889  |
| O | -1.01694445 | 1.45821502  | -1.92233704 |
| N | 0.24171321  | -2.30289943 | 0.46746102  |
| N | -2.65794864 | -1.57947692 | -0.23208882 |
| N | 2.65805606  | 1.57980672  | -0.22451194 |
| N | -0.24161505 | 2.30196585  | 0.47776866  |
| C | -0.72934051 | -3.11707317 | 0.12788763  |
| C | -2.07016970 | -2.76153211 | -0.29377459 |
| C | 2.07117396  | 2.76260996  | -0.27999232 |
| C | 0.73016085  | 3.11691368  | 0.14201359  |
| C | 1.47440575  | -2.91006629 | 0.94358518  |
| C | 2.22885369  | -3.81584729 | 0.13719788  |
| C | 3.42714887  | -4.33146240 | 0.68042008  |
| C | 3.86619533  | -3.98879537 | 1.96447644  |
| C | 3.09470100  | -3.11989017 | 2.75211818  |
| C | 1.89358035  | -2.57295303 | 2.26401872  |

|   |             |             |             |
|---|-------------|-------------|-------------|
| C | 2.96159757  | -3.98196619 | -2.30111310 |
| C | 1.83488423  | -4.26616891 | -1.27657471 |
| C | 1.45455144  | -5.77216499 | -1.29335670 |
| C | -3.46632912 | -0.11744039 | -3.93980506 |
| C | -3.49460612 | -1.42350040 | -3.10392565 |
| C | -3.85016010 | -2.64501724 | -3.99295303 |
| C | -4.07641629 | -1.38849931 | -0.56229912 |
| C | -4.46376722 | -1.30757550 | -1.92313125 |
| C | -5.84079108 | -1.11725968 | -2.17956854 |
| C | -6.77075300 | -1.01358698 | -1.13714451 |
| C | -6.34813178 | -1.09742068 | 0.20015731  |
| C | -4.98873659 | -1.28014065 | 0.51912661  |
| C | 1.75982229  | -0.92142001 | 4.23309917  |
| C | 0.98854552  | -1.74686849 | 3.18027333  |
| C | -0.03806523 | -2.68320010 | 3.88073274  |
| C | -5.23836927 | -0.40168531 | 2.91307112  |
| C | -4.54419814 | -1.42203551 | 1.97871320  |
| C | -4.79212060 | -2.87318750 | 2.47791822  |
| C | 4.07630989  | 1.38972927  | -0.55617027 |
| C | 4.46290245  | 1.31708928  | -1.91773201 |
| C | 5.83971188  | 1.12843263  | -2.17619834 |
| C | 6.77029404  | 1.01840473  | -1.13492567 |
| C | 6.34838086  | 1.09351156  | 0.20307655  |
| C | 4.98910341  | 1.27402544  | 0.52403304  |
| C | 3.46618508  | 0.14032931  | -3.94260252 |
| C | 3.49260291  | 1.43999782  | -3.09686634 |
| C | 3.84503618  | 2.66891802  | -3.97688537 |
| C | -1.76585776 | 0.90264642  | 4.23420348  |
| C | -0.99213449 | 1.73222977  | 3.18644168  |
| C | 0.03564329  | 2.66287927  | 3.89271882  |
| C | -1.47404446 | 2.90818128  | 0.95559175  |
| C | -1.89495246 | 2.56482782  | 2.27392503  |
| C | -3.09565051 | 3.11105208  | 2.76380072  |
| C | -3.86501281 | 3.98539381  | 1.98005479  |
| C | -3.42440574 | 4.33390610  | 0.69812040  |
| C | -2.22655266 | 3.81906553  | 0.15317755  |
| C | 5.23497173  | 0.37118053  | 2.90866759  |
| C | 4.54581816  | 1.40471329  | 1.98502497  |
| C | 4.80215068  | 2.84951592  | 2.49802909  |
| C | -2.95782506 | 3.99729481  | -2.28467422 |
| C | -1.83120206 | 4.27530485  | -1.25831716 |
| C | -1.44882166 | 5.78084646  | -1.26814002 |
| H | -0.57416288 | -4.19801854 | 0.16930291  |
| H | -2.70919848 | -3.57429709 | -0.62065647 |
| H | 2.71105912  | 3.57663232  | -0.60205081 |
| H | 0.57567056  | 4.19776540  | 0.18803868  |
| H | 4.02568356  | -5.01016253 | 0.07846423  |
| H | 4.79426387  | -4.40139912 | 2.35338908  |
| H | 3.42734578  | -2.87803029 | 3.75700357  |
| H | 0.97885970  | -3.68070809 | -1.61663860 |
| H | -2.47498876 | -1.57635701 | -2.74285308 |
| H | 3.87037475  | -4.56292874 | -2.09230001 |

|   |             |             |             |
|---|-------------|-------------|-------------|
| H | 3.21225357  | -2.91711307 | -2.29781238 |
| H | 2.61901750  | -4.24325449 | -3.31104795 |
| H | 2.30605447  | -6.40409106 | -1.00680793 |
| H | 1.13968032  | -6.06976020 | -2.30250548 |
| H | 0.63238691  | -5.99828026 | -0.59932986 |
| H | -4.45974329 | 0.13807015  | -4.33406773 |
| H | -2.78208781 | -0.24257999 | -4.78829391 |
| H | -3.09045375 | 0.71898731  | -3.34142904 |
| H | -3.86050118 | -3.57927206 | -3.41461235 |
| H | -3.10300449 | -2.74890038 | -4.78941220 |
| H | -4.83508665 | -2.53228316 | -4.46591179 |
| H | -6.17907573 | -1.04742199 | -3.20951787 |
| H | -7.82427161 | -0.86686353 | -1.36325688 |
| H | -7.08009377 | -1.01631931 | 0.99808028  |
| H | 0.42210901  | -1.04968639 | 2.55070457  |
| H | -3.46732818 | -1.22499769 | 2.03072244  |
| H | 2.26404754  | -1.56324525 | 4.96724672  |
| H | 1.06711969  | -0.28047069 | 4.79081378  |
| H | 2.51343059  | -0.28242369 | 3.76033562  |
| H | 0.47979586  | -3.41395186 | 4.51633837  |
| H | -0.63733431 | -3.23897868 | 3.14905045  |
| H | -0.72457111 | -2.10478793 | 4.51280621  |
| H | -5.07522631 | 0.62513063  | 2.56615244  |
| H | -4.83352912 | -0.48992709 | 3.92968179  |
| H | -6.31966199 | -0.57745536 | 2.97847067  |
| H | -5.86267203 | -3.11608974 | 2.45355023  |
| H | -4.43958431 | -2.98875531 | 3.51141483  |
| H | -4.26740023 | -3.61006624 | 1.85591310  |
| H | 6.17743200  | 1.06497534  | -3.20674904 |
| H | 7.82371454  | 0.87331416  | -1.36254204 |
| H | 7.08077689  | 1.00718655  | 1.00009274  |
| H | 2.47304607  | 1.58800192  | -2.73364078 |
| H | -0.42658408 | 1.03736254  | 2.55353060  |
| H | 4.45952800  | -0.10975732 | -4.34048908 |
| H | 2.78020619  | 0.27022757  | -4.78896239 |
| H | 3.09344255  | -0.70159740 | -3.34998027 |
| H | 3.85436947  | 3.59872225  | -3.39139574 |
| H | 3.09683655  | 2.77758185  | -4.77171111 |
| H | 4.82969956  | 2.56148859  | -4.45166003 |
| H | -2.26756805 | 1.54153193  | 4.97263888  |
| H | -1.07526456 | 0.25561243  | 4.78748308  |
| H | -2.52187475 | 0.26934714  | 3.75765265  |
| H | 0.63707505  | 3.22087480  | 3.16452378  |
| H | 0.72005595  | 2.07994478  | 4.52288572  |
| H | -0.48149120 | 3.39164980  | 4.53118551  |
| H | -3.42969945 | 2.86439144  | 3.76706626  |
| H | -4.79273792 | 4.39747486  | 2.37034064  |
| H | -4.02138925 | 5.01659555  | 0.09914622  |
| H | 3.46792190  | 1.21317685  | 2.03590017  |
| H | -0.97579106 | 3.69022440  | -1.60061405 |
| H | 6.31741457  | 0.53970197  | 2.97400775  |
| H | 5.06493540  | -0.65118274 | 2.55210205  |

|    |             |             |             |
|----|-------------|-------------|-------------|
| H  | 4.83212028  | 0.45204322  | 3.92668095  |
| H  | 4.45116007  | 2.95699848  | 3.53293025  |
| H  | 4.28096930  | 3.59525283  | 1.88363298  |
| H  | 5.87398235  | 3.08684431  | 2.47510743  |
| H  | -3.20959587 | 2.93270896  | -2.28660132 |
| H  | -2.61455107 | 4.26313980  | -3.29319025 |
| H  | -3.86602163 | 4.57825242  | -2.07337809 |
| H  | -0.62661547 | 6.00275350  | -0.57280081 |
| H  | -2.29959307 | 6.41260409  | -0.97905323 |
| H  | -1.13319481 | 6.08258566  | -2.27582105 |
| O  | -0.47896790 | -1.53699332 | -2.18891832 |
| O  | 1.01531341  | -1.44823435 | -1.93052608 |
| O  | 0.47698682  | 1.54739521  | -2.18262186 |
| O  | 1.96251078  | 0.45219465  | 0.12242911  |
| Zr | -0.00041228 | 0.00220026  | -0.84384401 |

Oxo  $\eta^2$ -Ozone Complex (conformation 1 lowest energy)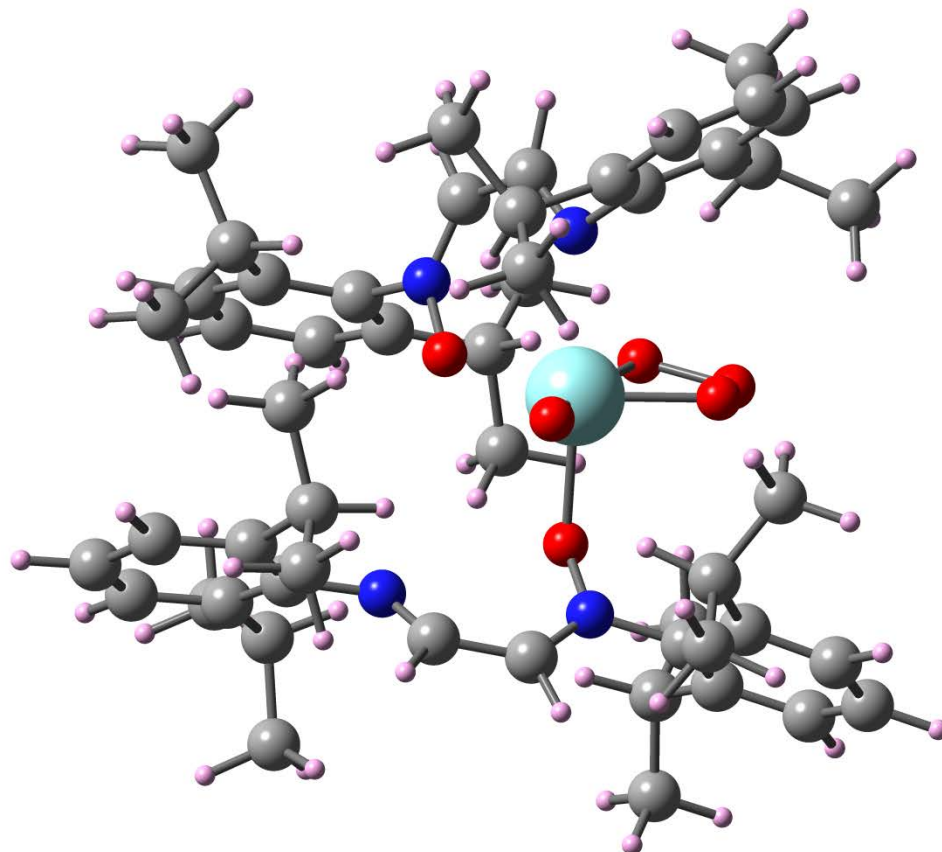Fig. S60: NCCNO Oxo  $\eta^2$ -Ozone Complex (conformation 1 lowest energy)

| SCF            | $E_{ZP}$     | H            | G            |
|----------------|--------------|--------------|--------------|
| -2741.39635270 | -2740.243536 | -2740.171925 | -2740.354967 |

|    |             |             |             |
|----|-------------|-------------|-------------|
| Zr | -1.03551600 | -0.12960200 | -0.04626400 |
| O  | 0.90323700  | -1.18409000 | -0.46090900 |
| O  | -0.28420100 | 1.89456500  | -0.59536000 |
| O  | -2.96921700 | 0.30522200  | -0.70533900 |
| N  | 2.08223300  | 2.14743900  | 1.10823900  |
| N  | -0.63292800 | 3.02908400  | 0.05989100  |
| N  | -1.58055700 | -2.46331500 | 0.16805900  |
| N  | 1.14921600  | -2.33843500 | -1.10817200 |
| C  | 1.28328300  | 3.00763500  | 1.66283700  |
| C  | 0.06917900  | 3.53169300  | 1.05408100  |
| C  | -0.93566900 | -3.46041900 | -0.39616000 |
| C  | 0.33514800  | -3.38568300 | -1.06983300 |
| C  | 3.27027500  | 1.71122000  | 1.75547000  |
| C  | 3.28703000  | 1.21148300  | 3.09565800  |
| C  | 4.53811300  | 0.85262400  | 3.64124600  |
| C  | 5.72448100  | 0.96259000  | 2.90063600  |
| C  | 5.67874200  | 1.39304700  | 1.56273200  |

|   |             |             |             |
|---|-------------|-------------|-------------|
| C | 4.46016300  | 1.75361900  | 0.96120500  |
| C | 1.92986500  | -0.53016300 | 4.35903500  |
| C | 2.01731500  | 0.95568300  | 3.92186600  |
| C | 1.94041800  | 1.88654000  | 5.16103500  |
| C | -4.34079600 | 2.14585500  | 1.79830500  |
| C | -3.10369300 | 3.08038700  | 1.75573000  |
| C | -3.15434900 | 4.11724400  | 2.90981200  |
| C | -1.83828400 | 3.72191400  | -0.43342200 |
| C | -2.98853300 | 3.77549700  | 0.39316000  |
| C | -4.09189900 | 4.49708200  | -0.11181000 |
| C | -4.05371700 | 5.09781000  | -1.37780200 |
| C | -2.90869400 | 4.98484500  | -2.18219200 |
| C | -1.76934700 | 4.29010000  | -1.73081800 |
| C | 5.37493400  | 1.52413000  | -1.42988600 |
| C | 4.39862500  | 2.25816400  | -0.48208400 |
| C | 4.64169000  | 3.79281100  | -0.53395300 |
| C | -0.86175900 | 3.17021000  | -3.80334700 |
| C | -0.54675500 | 4.15417100  | -2.64354800 |
| C | -0.06406200 | 5.52394400  | -3.18444000 |
| C | -2.86829800 | -2.81113600 | 0.78198800  |
| C | -3.98967600 | -3.08611800 | -0.05062900 |
| C | -5.19235300 | -3.45904100 | 0.58647800  |
| C | -5.28490100 | -3.55016500 | 1.98240300  |
| C | -4.16612700 | -3.25971500 | 2.77714900  |
| C | -2.93725800 | -2.88034300 | 2.19947600  |
| C | -5.12469400 | -2.11708700 | -2.12062700 |
| C | -3.95597100 | -2.98066800 | -1.58142800 |
| C | -3.98080200 | -4.38823100 | -2.23921700 |
| C | 4.46390100  | -2.51731600 | 1.26017000  |
| C | 3.48007300  | -3.32873700 | 0.37925400  |
| C | 3.73357900  | -4.85333700 | 0.52124300  |
| C | 2.43958900  | -2.40783400 | -1.80936100 |
| C | 3.55703600  | -2.89234500 | -1.08770900 |
| C | 4.78026400  | -2.96425900 | -1.78568300 |
| C | 4.87031400  | -2.55967500 | -3.12763000 |
| C | 3.74157500  | -2.06567100 | -3.80000300 |
| C | 2.49046700  | -1.96867400 | -3.15323800 |
| C | -2.03146600 | -1.71935700 | 4.29084000  |
| C | -1.71479900 | -2.64485900 | 3.09264200  |
| C | -1.12731700 | -4.00198600 | 3.56837100  |
| C | 1.53708100  | 0.00963100  | -4.43402800 |
| C | 1.27125200  | -1.42050300 | -3.89941000 |
| C | 0.85132100  | -2.37112800 | -5.05177300 |
| H | 1.51023800  | 3.47390900  | 2.63036700  |
| H | -0.33329700 | 4.44757400  | 1.47278400  |
| H | -1.38137100 | -4.45668700 | -0.39162600 |
| H | 0.68726700  | -4.26373100 | -1.59698900 |
| H | 4.58104600  | 0.47223000  | 4.65889100  |
| H | 6.67561000  | 0.69479100  | 3.35490700  |
| H | 6.59723600  | 1.44281700  | 0.98497100  |
| H | 1.13173200  | 1.13514800  | 3.30340400  |
| H | -2.23955400 | 2.42630400  | 1.91339700  |

|   |             |             |             |
|---|-------------|-------------|-------------|
| H | 2.74447200  | -0.80655900 | 5.04159800  |
| H | 1.96848200  | -1.19441000 | 3.48709200  |
| H | 0.97891000  | -0.70674900 | 4.87576800  |
| H | 2.78646100  | 1.71431600  | 5.83989300  |
| H | 1.01429600  | 1.69861200  | 5.71968900  |
| H | 1.95816700  | 2.94753700  | 4.87710800  |
| H | -5.28298800 | 2.70773200  | 1.73300400  |
| H | -4.34395600 | 1.58799400  | 2.74335700  |
| H | -4.30117600 | 1.42433900  | 0.97552400  |
| H | -2.26588100 | 4.76520500  | 2.92581900  |
| H | -3.21202500 | 3.59869600  | 3.87553200  |
| H | -4.03477600 | 4.76849400  | 2.82377800  |
| H | -4.99675600 | 4.56355700  | 0.48517700  |
| H | -4.92181700 | 5.63980000  | -1.74547500 |
| H | -2.89960100 | 5.43763800  | -3.16955600 |
| H | 3.37661900  | 2.07635200  | -0.83631300 |
| H | 0.27790200  | 3.71423900  | -2.07328000 |
| H | 6.42506000  | 1.73956700  | -1.18965500 |
| H | 5.20392800  | 1.85184100  | -2.46387400 |
| H | 5.22902200  | 0.43734400  | -1.39169700 |
| H | 5.64998000  | 4.04131800  | -0.17525500 |
| H | 3.91837100  | 4.33317100  | 0.08969800  |
| H | 4.54522300  | 4.16192000  | -1.56392300 |
| H | -1.16073900 | 2.19095700  | -3.41508300 |
| H | 0.02696600  | 3.04014200  | -4.43557900 |
| H | -1.67485500 | 3.55366000  | -4.43482800 |
| H | -0.81563000 | 5.99600000  | -3.83005800 |
| H | 0.84544600  | 5.38742600  | -3.78439800 |
| H | 0.16609400  | 6.22236100  | -2.36883800 |
| H | -6.06827500 | -3.66708100 | -0.02172200 |
| H | -6.22393200 | -3.84033000 | 2.44809000  |
| H | -4.24478200 | -3.33061700 | 3.85835700  |
| H | -3.03778000 | -2.47043100 | -1.88821300 |
| H | 2.47324700  | -3.12171500 | 0.76026900  |
| H | -6.10170500 | -2.58759300 | -1.94170800 |
| H | -5.01012700 | -1.97833100 | -3.20309900 |
| H | -5.11097800 | -1.12751200 | -1.65505300 |
| H | -3.13195600 | -5.01046100 | -1.92154700 |
| H | -3.94067300 | -4.29295600 | -3.33245200 |
| H | -4.90075900 | -4.93035600 | -1.98090400 |
| H | 5.50714500  | -2.69726900 | 0.96972500  |
| H | 4.35523300  | -2.80920000 | 2.31261600  |
| H | 4.27050400  | -1.44192500 | 1.18420100  |
| H | 3.01634700  | -5.43970900 | -0.06831900 |
| H | 3.64111700  | -5.15781000 | 1.57174600  |
| H | 4.74222300  | -5.12075100 | 0.18085200  |
| H | 5.66558500  | -3.33236000 | -1.27430800 |
| H | 5.82322700  | -2.62414300 | -3.64745400 |
| H | 3.82944500  | -1.74639000 | -4.83476100 |
| H | -0.95424800 | -2.12211500 | 2.50472800  |
| H | 0.41622900  | -1.33569200 | -3.22134000 |
| H | -2.81660900 | -2.12770300 | 4.94117300  |



|   |             |             |             |
|---|-------------|-------------|-------------|
| H | -2.33579300 | -0.73496700 | 3.92172700  |
| H | -1.13090900 | -1.58685000 | 4.90499800  |
| H | -0.22136900 | -3.83704400 | 4.16760200  |
| H | -0.86305500 | -4.64847100 | 2.71952900  |
| H | -1.84990900 | -4.54885200 | 4.18932000  |
| H | 1.80927500  | 0.68804700  | -3.61675900 |
| H | 0.62432900  | 0.39714000  | -4.90070500 |
| H | 2.34045100  | 0.02473600  | -5.18351200 |
| H | 0.62663900  | -3.38034100 | -4.68092900 |
| H | 1.63925700  | -2.45914200 | -5.81234700 |
| H | -0.05175100 | -1.98238400 | -5.53744500 |
| O | -1.16461000 | 0.27931200  | 1.74669600  |
| O | -2.76234000 | 0.06316100  | -2.19063500 |
| O | -1.43934500 | -0.61273100 | -2.25945300 |

Oxo  $\eta^2$ -Ozone Complex (conformation 2 higher energy)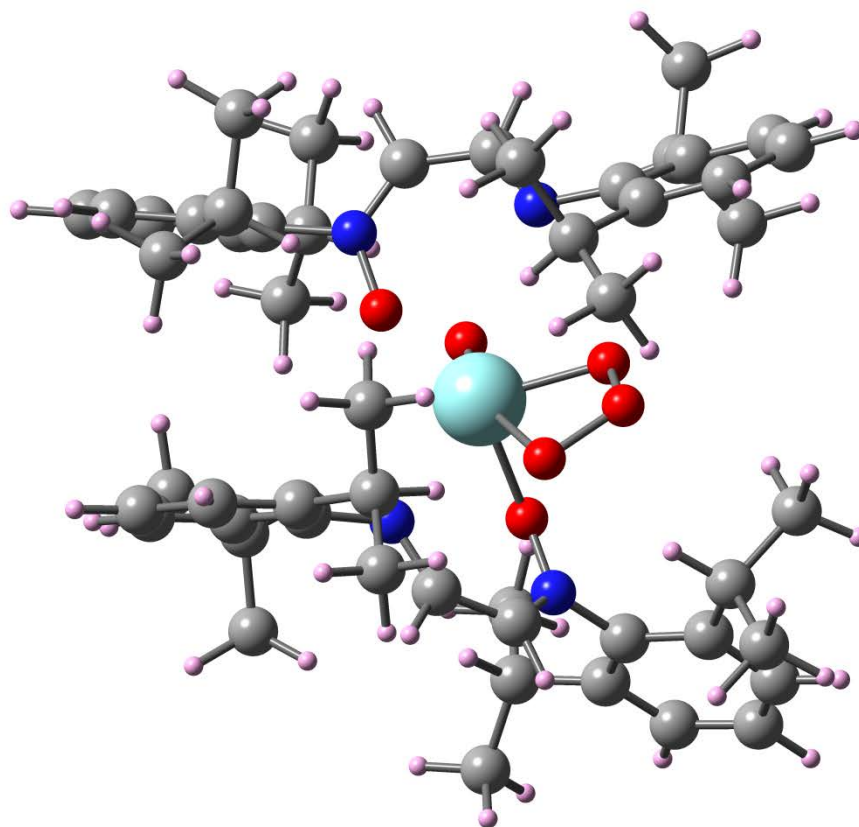Fig. S61: NCCNO Oxo  $\eta^2$ -Ozone Complex (conformation 2 higher energy)

| SCF           | $E_{ZP}$     | H            | G            |
|---------------|--------------|--------------|--------------|
| -2741.3926268 | -2740.238296 | -2740.167490 | -2740.346525 |

|    |             |             |             |
|----|-------------|-------------|-------------|
| Zr | 0.38331700  | -0.06888200 | -0.43467900 |
| O  | -1.82610200 | 0.05223700  | -0.08024900 |
| O  | 2.36682900  | -1.06616900 | -0.64161500 |
| O  | 1.34197800  | 1.80552200  | -0.44512400 |
| N  | 0.41473700  | -1.87269600 | 1.27585400  |
| N  | 3.25335000  | -1.29069100 | 0.35286600  |
| N  | -1.31522400 | 2.93659100  | -0.43043200 |
| N  | -2.76813300 | 0.33328600  | -1.02758200 |
| C  | 1.52223600  | -1.95101500 | 1.98407500  |
| C  | 2.85961400  | -1.58875400 | 1.58421100  |
| C  | -2.11360300 | 2.71642800  | -1.43859900 |
| C  | -2.88298100 | 1.50470500  | -1.62667900 |
| C  | -0.75536100 | -2.50921600 | 1.86620400  |
| C  | -1.30452500 | -2.03057900 | 3.08900600  |
| C  | -2.38502600 | -2.75148600 | 3.64366500  |
| C  | -2.90969400 | -3.88749900 | 3.01330300  |
| C  | -2.36983300 | -4.32161500 | 1.79108900  |

|   |             |             |             |
|---|-------------|-------------|-------------|
| C | -1.28838000 | -3.64609900 | 1.19376500  |
| C | -1.95879700 | 0.27965000  | 3.91746500  |
| C | -0.81630300 | -0.76315300 | 3.80450400  |
| C | -0.23647200 | -1.08604500 | 5.20721400  |
| C | 4.88300500  | 2.41865100  | 0.36958700  |
| C | 4.81136000  | 1.10223600  | 1.18679500  |
| C | 5.51104600  | 1.26157700  | 2.56192700  |
| C | 4.66549600  | -1.19383900 | -0.02441700 |
| C | 5.40837300  | -0.06181700 | 0.38939800  |
| C | 6.76590800  | -0.01953900 | 0.00048800  |
| C | 7.33230500  | -1.03945300 | -0.77677700 |
| C | 6.55340500  | -2.13319900 | -1.19093100 |
| C | 5.19726100  | -2.23774400 | -0.82431600 |
| C | -1.64399300 | -4.87447400 | -1.04124300 |
| C | -0.64342700 | -4.17691300 | -0.09145500 |
| C | 0.52526200  | -5.14493000 | 0.24847200  |
| C | 3.92666600  | -3.17023500 | -2.79977700 |
| C | 4.34509700  | -3.40939800 | -1.32256900 |
| C | 5.05537300  | -4.77562900 | -1.15679400 |
| C | -0.63477100 | 4.17195500  | -0.28293500 |
| C | 0.03974900  | 4.83039300  | -1.36237200 |
| C | 0.61072000  | 6.09151800  | -1.10125600 |
| C | 0.54353700  | 6.68064900  | 0.17091400  |
| C | -0.04926800 | 5.98328700  | 1.23692100  |
| C | -0.62023800 | 4.71338400  | 1.04147000  |
| C | 1.81807200  | 4.02907400  | -2.98541900 |
| C | 0.29482400  | 4.18177000  | -2.73099500 |
| C | -0.38614300 | 4.96573600  | -3.88337700 |
| C | -5.41603300 | -0.86878900 | 2.11704300  |
| C | -4.91060100 | -0.09003100 | 0.88071900  |
| C | -5.86212100 | 1.10269300  | 0.57667600  |
| C | -3.73611200 | -0.73995300 | -1.32522700 |
| C | -4.75764900 | -0.96939100 | -0.36612400 |
| C | -5.68983400 | -1.98540500 | -0.65267500 |
| C | -5.60837400 | -2.72511400 | -1.84481400 |
| C | -4.59901900 | -2.45397700 | -2.77863300 |
| C | -3.62934400 | -1.45105300 | -2.54687000 |
| C | -0.53080000 | 4.14978400  | 3.54014000  |
| C | -1.26700000 | 3.94741800  | 2.19638000  |
| C | -2.76983100 | 4.31883100  | 2.33249000  |
| C | -1.83840300 | -2.42219400 | -4.09926200 |
| C | -2.57817800 | -1.14876700 | -3.62169400 |
| C | -3.23873700 | -0.42729400 | -4.82875700 |
| H | 1.48271500  | -2.40329900 | 2.97861900  |
| H | 3.65021400  | -1.70094200 | 2.31590200  |
| H | -2.32815700 | 3.48166500  | -2.19302400 |
| H | -3.67537400 | 1.54595600  | -2.36621800 |
| H | -2.82169200 | -2.41069400 | 4.57922500  |
| H | -3.73701900 | -4.42931900 | 3.46581600  |
| H | -2.78998200 | -5.19575000 | 1.30339900  |
| H | -0.03001400 | -0.28162400 | 3.21503500  |
| H | 3.74984800  | 0.92138400  | 1.37360800  |

|   |             |             |             |
|---|-------------|-------------|-------------|
| H | -2.79980800 | -0.09723100 | 4.51524800  |
| H | -2.33112300 | 0.54925200  | 2.92243700  |
| H | -1.58247500 | 1.19137800  | 4.39837300  |
| H | -0.99952300 | -1.51551900 | 5.87044000  |
| H | 0.14189200  | -0.16940200 | 5.67785100  |
| H | 0.59292800  | -1.80456200 | 5.15081700  |
| H | 5.91998300  | 2.70275300  | 0.14303600  |
| H | 4.41678900  | 3.23035000  | 0.94016500  |
| H | 4.32948100  | 2.31941300  | -0.57042400 |
| H | 5.44650700  | 0.34215700  | 3.16037500  |
| H | 5.03209000  | 2.06921900  | 3.12925400  |
| H | 6.57427400  | 1.51291200  | 2.44930300  |
| H | 7.37438800  | 0.82978100  | 0.29834200  |
| H | 8.37801500  | -0.97958300 | -1.06909100 |
| H | 7.00312200  | -2.91042800 | -1.80187100 |
| H | -0.21282300 | -3.32397400 | -0.63220600 |
| H | 3.42022500  | -3.44815300 | -0.73414100 |
| H | -2.01247000 | -5.82013000 | -0.62183000 |
| H | -1.14828600 | -5.11300900 | -1.99095800 |
| H | -2.50706500 | -4.23464100 | -1.25832500 |
| H | 0.15104900  | -6.02545700 | 0.78781800  |
| H | 1.28407500  | -4.66213100 | 0.87655300  |
| H | 1.01566600  | -5.48969900 | -0.67171500 |
| H | 3.34714100  | -2.24581100 | -2.88995500 |
| H | 3.30701500  | -4.00321200 | -3.15817800 |
| H | 4.80913400  | -3.09776300 | -3.44981600 |
| H | 5.94326700  | -4.85455600 | -1.79698400 |
| H | 4.37296900  | -5.58603400 | -1.44446600 |
| H | 5.37043900  | -4.94533600 | -0.11893100 |
| H | 1.13466800  | 6.61128300  | -1.89962800 |
| H | 0.97874700  | 7.66348200  | 0.33794700  |
| H | -0.05055500 | 6.42588400  | 2.22843200  |
| H | -0.10246400 | 3.16276800  | -2.72836300 |
| H | -3.92640000 | 0.31689600  | 1.13506500  |
| H | 2.32484200  | 5.00186600  | -3.03864300 |
| H | 1.98629500  | 3.50624800  | -3.93673700 |
| H | 2.26572300  | 3.43490100  | -2.18229700 |
| H | -1.47348600 | 5.04423900  | -3.74183400 |
| H | -0.20101800 | 4.46615100  | -4.84354600 |
| H | 0.00894300  | 5.98776200  | -3.95521200 |
| H | -6.45369000 | -1.20639300 | 1.99279500  |
| H | -5.38960400 | -0.21614700 | 2.99911800  |
| H | -4.78707100 | -1.74174700 | 2.31983600  |
| H | -5.50239400 | 1.71013700  | -0.26335600 |
| H | -5.94101700 | 1.75698000  | 1.45458300  |
| H | -6.86906700 | 0.74270900  | 0.32640600  |
| H | -6.48519700 | -2.19615300 | 0.05528900  |
| H | -6.33803700 | -3.50564500 | -2.04777100 |
| H | -4.55579100 | -3.02462100 | -3.70194700 |
| H | -1.20832900 | 2.88460300  | 1.93968900  |
| H | -1.79494500 | -0.50537000 | -3.20692600 |
| H | -0.61756700 | 5.17956100  | 3.91325200  |

|   |             |             |             |
|---|-------------|-------------|-------------|
| H | 0.53228400  | 3.90108500  | 3.44197100  |
| H | -0.96570700 | 3.49081800  | 4.30343600  |
| H | -3.23900900 | 3.73044200  | 3.13330900  |
| H | -3.31428400 | 4.12072200  | 1.40022800  |
| H | -2.89115600 | 5.38349900  | 2.57656700  |
| H | -1.33505900 | -2.91368100 | -3.26055200 |
| H | -1.06509100 | -2.13760500 | -4.82270400 |
| H | -2.50947100 | -3.14591100 | -4.58307800 |
| H | -3.74345800 | 0.50194700  | -4.52961400 |
| H | -3.98667400 | -1.06645700 | -5.31825800 |
| H | -2.47275200 | -0.16947600 | -5.57114200 |
| O | 1.58785000  | 2.01182500  | 1.02193500  |
| O | 1.20524200  | 0.72371000  | 1.62993000  |
| O | 0.07343100  | -0.21509400 | -2.22954100 |

Oxo  $\eta^3$ -Ozone Complex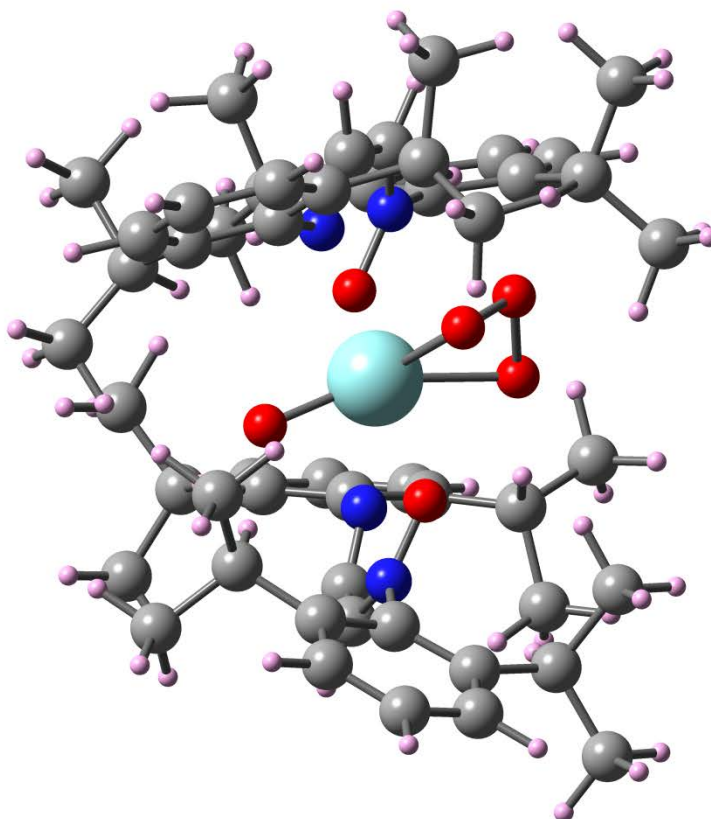Fig. S62: NCCNO Oxo  $\eta^3$ -Ozone Complex

| SCF            | $E_{ZP}$     | H            | G            |
|----------------|--------------|--------------|--------------|
| -2741.39251827 | -2740.237776 | -2740.166229 | -2740.346537 |

|    |             |             |             |
|----|-------------|-------------|-------------|
| Zr | 0.26999600  | 0.13555000  | -0.18296400 |
| O  | -1.95618200 | 0.40887000  | 0.23738200  |
| O  | 2.22929700  | -1.00317900 | -0.73809000 |
| O  | 1.00620600  | 1.03161100  | -1.97992200 |
| N  | 0.02943800  | -2.13695500 | 0.83352400  |
| N  | 2.96429500  | -1.76998500 | 0.06030300  |
| N  | -0.23592600 | 2.60738100  | -0.16821000 |
| N  | -2.82040800 | 1.12283800  | -0.52057500 |
| C  | 1.06584900  | -2.80761400 | 1.26517800  |
| C  | 2.46400200  | -2.57320100 | 0.98628700  |
| C  | -1.33026700 | 3.08587700  | -0.70010800 |
| C  | -2.54081700 | 2.33759600  | -0.95845500 |
| C  | -1.25622100 | -2.63617300 | 1.32484000  |
| C  | -1.62990600 | -2.35405800 | 2.66689800  |
| C  | -2.84121800 | -2.90895500 | 3.13486000  |
| C  | -3.64958500 | -3.69825400 | 2.30488800  |
| C  | -3.26236600 | -3.94525400 | 0.97731900  |

|   |             |             |             |
|---|-------------|-------------|-------------|
| C | -2.06036000 | -3.42415100 | 0.45733600  |
| C | -1.60083200 | -0.32620000 | 4.21759500  |
| C | -0.77802400 | -1.48982100 | 3.60850300  |
| C | -0.14898200 | -2.34829300 | 4.73915900  |
| C | 4.90735400  | 1.55685200  | 1.44879500  |
| C | 4.54363700  | 0.07050400  | 1.69968300  |
| C | 4.97181000  | -0.36826500 | 3.12490800  |
| C | 4.41710500  | -1.70855100 | -0.17410200 |
| C | 5.17493600  | -0.83181900 | 0.63370000  |
| C | 6.56726300  | -0.80552900 | 0.39774300  |
| C | 7.14461300  | -1.59181000 | -0.61078100 |
| C | 6.34492900  | -2.41682100 | -1.42070700 |
| C | 4.95078800  | -2.49287100 | -1.22550600 |
| C | -2.77376100 | -3.97291800 | -1.94979100 |
| C | -1.60109500 | -3.75856100 | -0.96585500 |
| C | -0.68933000 | -5.01846200 | -0.96500800 |
| C | 3.71441200  | -2.48238200 | -3.42669700 |
| C | 4.06106300  | -3.31750100 | -2.16079600 |
| C | 4.68525300  | -4.67997800 | -2.54561800 |
| C | 0.84031900  | 3.55312200  | 0.09756600  |
| C | 1.49157900  | 4.24175100  | -0.96879200 |
| C | 2.53152300  | 5.13391700  | -0.62520100 |
| C | 2.90045100  | 5.35659200  | 0.70761100  |
| C | 2.22582800  | 4.68504800  | 1.73910800  |
| C | 1.19079500  | 3.77202400  | 1.46180900  |
| C | 2.37448600  | 3.61655300  | -3.27958900 |
| C | 1.14488800  | 4.07418500  | -2.45517600 |
| C | 0.54795600  | 5.38516300  | -3.03592500 |
| C | -5.37121300 | -0.01166500 | 2.79662700  |
| C | -4.71797100 | 0.82442100  | 1.67305900  |
| C | -5.16933000 | 2.30972500  | 1.78496100  |
| C | -4.11732900 | 0.49277100  | -0.81835500 |
| C | -5.01500400 | 0.29314400  | 0.26531400  |
| C | -6.24210700 | -0.32978700 | -0.02929100 |
| C | -6.55839300 | -0.72388100 | -1.34103900 |
| C | -5.65830400 | -0.48676300 | -2.38722000 |
| C | -4.40754600 | 0.13195500  | -2.15899800 |
| C | 1.27847600  | 2.65130900  | 3.76919400  |
| C | 0.38891500  | 3.14980400  | 2.60869600  |
| C | -0.68001500 | 4.15917000  | 3.11328100  |
| C | -3.16957300 | -0.86956700 | -4.16824700 |
| C | -3.48769600 | 0.40988700  | -3.35602800 |
| C | -4.11728000 | 1.49964600  | -4.26831700 |
| H | 0.90424300  | -3.65939200 | 1.93205000  |
| H | 3.19128600  | -3.15426300 | 1.53968700  |
| H | -1.39700600 | 4.14358900  | -0.96554500 |
| H | -3.33066100 | 2.82845600  | -1.51318000 |
| H | -3.15064900 | -2.71886600 | 4.15981600  |
| H | -4.57584400 | -4.12084900 | 2.68811600  |
| H | -3.89904700 | -4.55238900 | 0.34112300  |
| H | 0.03206300  | -1.02284500 | 3.03725200  |
| H | 3.44962600  | 0.00897000  | 1.64227000  |

|   |             |             |             |
|---|-------------|-------------|-------------|
| H | -2.42526000 | -0.68800900 | 4.84697400  |
| H | -2.02042400 | 0.30548400  | 3.42614000  |
| H | -0.95082800 | 0.30014200  | 4.84234900  |
| H | -0.92226500 | -2.82199500 | 5.35932700  |
| H | 0.47139900  | -1.71990700 | 5.39187300  |
| H | 0.48665300  | -3.14853200 | 4.33644800  |
| H | 5.98603300  | 1.73968300  | 1.55057800  |
| H | 4.38433500  | 2.19234000  | 2.17328900  |
| H | 4.59601900  | 1.87323300  | 0.44654500  |
| H | 4.68471100  | -1.40846700 | 3.33106200  |
| H | 4.48536300  | 0.26979300  | 3.87366800  |
| H | 6.05886600  | -0.28612000 | 3.26264200  |
| H | 7.19577100  | -0.15388500 | 0.99833200  |
| H | 8.21864000  | -1.55298800 | -0.77731100 |
| H | 6.80700400  | -3.00104100 | -2.21068800 |
| H | -1.01360100 | -2.91185600 | -1.34221600 |
| H | 3.11146300  | -3.52609300 | -1.65095500 |
| H | -3.32420200 | -4.90039300 | -1.73798300 |
| H | -2.38435900 | -4.04877500 | -2.97271100 |
| H | -3.48108900 | -3.13655700 | -1.91773300 |
| H | -1.23838200 | -5.89660700 | -0.59753900 |
| H | 0.19525600  | -4.88480800 | -0.33029000 |
| H | -0.34193200 | -5.23252000 | -1.98436400 |
| H | 3.18535400  | -1.56344000 | -3.15441000 |
| H | 3.06592800  | -3.06373100 | -4.09509500 |
| H | 4.62692000  | -2.21672900 | -3.97774100 |
| H | 5.57796900  | -4.55601000 | -3.17199600 |
| H | 3.96173800  | -5.26694000 | -3.12554500 |
| H | 4.96916900  | -5.26348900 | -1.65990400 |
| H | 3.05673300  | 5.65835900  | -1.41922700 |
| H | 3.70212200  | 6.05318500  | 0.94219400  |
| H | 2.50155000  | 4.87715200  | 2.77198200  |
| H | 0.40998500  | 3.27344100  | -2.56470800 |
| H | -3.63541100 | 0.78470900  | 1.82831100  |
| H | 3.20009200  | 4.33913800  | -3.22787400 |
| H | 2.09279400  | 3.50045900  | -4.33485400 |
| H | 2.72094000  | 2.64354200  | -2.91860600 |
| H | -0.34350800 | 5.71227400  | -2.48150500 |
| H | 0.26216900  | 5.23733900  | -4.08597800 |
| H | 1.27551900  | 6.20689900  | -2.99905400 |
| H | -6.46530300 | 0.08375800  | 2.79723700  |
| H | -5.01372800 | 0.34267300  | 3.77184200  |
| H | -5.11048300 | -1.07136800 | 2.70375500  |
| H | -4.68196100 | 2.94474400  | 1.03431500  |
| H | -4.91697100 | 2.70777400  | 2.77634700  |
| H | -6.25548200 | 2.39712600  | 1.64794200  |
| H | -6.95665300 | -0.50646500 | 0.76779100  |
| H | -7.51079700 | -1.20739900 | -1.54515300 |
| H | -5.92016200 | -0.78636400 | -3.39789000 |
| H | -0.11997700 | 2.26446500  | 2.22021000  |
| H | -2.52087900 | 0.77750700  | -3.00573100 |
| H | 1.85874000  | 3.45823900  | 4.23745900  |



|   |             |             |             |
|---|-------------|-------------|-------------|
| H | 1.95522400  | 1.87601200  | 3.39660500  |
| H | 0.64951800  | 2.20405200  | 4.55121600  |
| H | -1.29773900 | 3.69932000  | 3.89681300  |
| H | -1.34550400 | 4.48347500  | 2.30088800  |
| H | -0.20809800 | 5.05703000  | 3.53554200  |
| H | -2.58002800 | -1.55971800 | -3.56002300 |
| H | -2.56049600 | -0.60272200 | -5.04108400 |
| H | -4.07606800 | -1.37493000 | -4.52826800 |
| H | -4.33714000 | 2.42581300  | -3.71790700 |
| H | -5.05800900 | 1.15206500  | -4.71555400 |
| H | -3.42591300 | 1.74549900  | -5.08402200 |
| O | 1.15655200  | 0.33820100  | 1.43550700  |
| O | -0.35029300 | 0.54623500  | -2.50850400 |
| O | -0.48798200 | -0.90145100 | -2.03637300 |

## Reactant for Ligand Cyclization

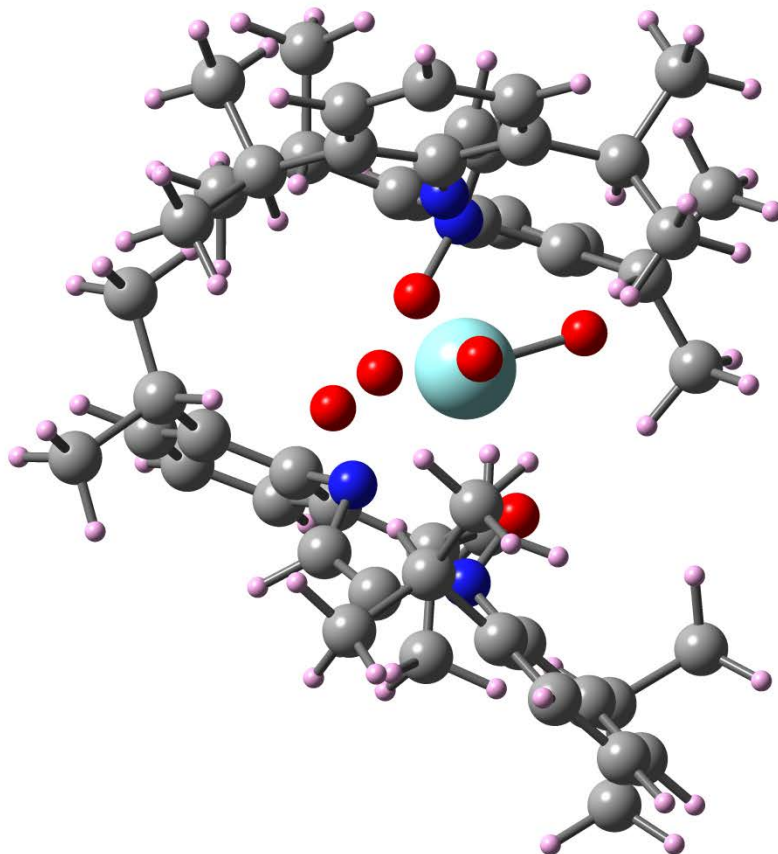

Fig. S63: NCCNO Reactant for Ligand Cyclization

|    | SCF            | E <sub>ZP</sub> | H            | G            |
|----|----------------|-----------------|--------------|--------------|
|    | -2741.39852398 | -2740.243660    | -2740.172289 | -2740.351026 |
| Zr | 0.42060000     | 0.28724200      | -0.35392400  |              |
| O  | -1.86666600    | 0.04103200      | -0.12577100  |              |
| O  | 2.02067500     | -1.27382200     | -0.56745300  |              |
| O  | 2.07817100     | 1.62383600      | -0.34058400  |              |
| N  | 0.06661000     | -1.55134600     | 1.43056500   |              |
| N  | 2.90878100     | -1.58274800     | 0.40740900   |              |
| N  | -0.61126500    | 2.60587100      | -0.54130400  |              |
| N  | -2.76527800    | 0.52636200      | -1.00103500  |              |
| C  | 1.15834000     | -1.79677300     | 2.12199800   |              |
| C  | 2.52602900     | -1.69886800     | 1.67270700   |              |
| C  | -1.72810000    | 2.76625300      | -1.19936600  |              |
| C  | -2.71060300    | 1.74700400      | -1.49926200  |              |
| C  | -1.16691800    | -2.03703200     | 2.04116800   |              |
| C  | -1.69719000    | -1.42538700     | 3.20934500   |              |
| C  | -2.83795600    | -2.01387400     | 3.79964000   |              |
| C  | -3.43996900    | -3.15423200     | 3.25205300   |              |
| C  | -2.91283800    | -3.72685200     | 2.08271100   |              |

|   |             |             |             |
|---|-------------|-------------|-------------|
| C | -1.77271900 | -3.18573500 | 1.45742800  |
| C | -2.15990700 | 0.97049500  | 3.91283500  |
| C | -1.10255500 | -0.16150800 | 3.84313400  |
| C | -0.52734600 | -0.44721300 | 5.25608900  |
| C | 5.49019400  | 1.61429500  | 0.47974200  |
| C | 5.07869800  | 0.32323900  | 1.23310200  |
| C | 5.83094000  | 0.20274800  | 2.58541400  |
| C | 4.28560900  | -1.81261100 | -0.03683800 |
| C | 5.30851500  | -0.91607800 | 0.36213500  |
| C | 6.61306900  | -1.19438800 | -0.10396300 |
| C | 6.87396600  | -2.29048600 | -0.93672500 |
| C | 5.83054200  | -3.14661700 | -1.32512600 |
| C | 4.51109000  | -2.93157300 | -0.88204100 |
| C | -2.19320600 | -4.51510300 | -0.70484000 |
| C | -1.14988400 | -3.87441700 | 0.23882300  |
| C | -0.12060000 | -4.94810800 | 0.69326600  |
| C | 2.99654800  | -3.56968900 | -2.80525000 |
| C | 3.39026500  | -3.87386300 | -1.33425300 |
| C | 3.76641300  | -5.36601700 | -1.15248900 |
| C | 0.19861200  | 3.82323200  | -0.42625700 |
| C | 0.83756700  | 4.33939500  | -1.58620700 |
| C | 1.54136300  | 5.55444800  | -1.45159200 |
| C | 1.61900100  | 6.22242900  | -0.22098900 |
| C | 1.00795800  | 5.66806400  | 0.91429400  |
| C | 0.29700700  | 4.45385700  | 0.83900400  |
| C | 2.33085900  | 3.24119800  | -3.31307000 |
| C | 0.87058800  | 3.60366800  | -2.93288000 |
| C | 0.19098300  | 4.42757300  | -4.05732100 |
| C | -5.77303300 | -0.29353100 | 1.91095700  |
| C | -5.13272500 | 0.44989100  | 0.71501400  |
| C | -5.94438900 | 1.73409700  | 0.38332800  |
| C | -3.86933400 | -0.37639500 | -1.38198000 |
| C | -5.00136400 | -0.43121300 | -0.53246000 |
| C | -6.04824600 | -1.28937200 | -0.92575700 |
| C | -5.95594800 | -2.04704000 | -2.10527200 |
| C | -4.81928400 | -1.95682700 | -2.92275200 |
| C | -3.73682100 | -1.11527400 | -2.58287000 |
| C | 0.48429200  | 3.95991300  | 3.34214600  |
| C | -0.40055100 | 3.88300600  | 2.07601400  |
| C | -1.76441100 | 4.59095100  | 2.30603500  |
| C | -1.98639800 | -2.35261200 | -3.99018000 |
| C | -2.52851500 | -0.98209700 | -3.51713300 |
| C | -2.89968700 | -0.10508800 | -4.74548500 |
| H | 1.07116400  | -2.21097000 | 3.13140300  |
| H | 3.31056900  | -1.90249800 | 2.39065200  |
| H | -1.98460100 | 3.75109100  | -1.59840100 |
| H | -3.51614000 | 2.00881000  | -2.17382600 |
| H | -3.25665400 | -1.57033800 | 4.69993600  |
| H | -4.31155000 | -3.59516000 | 3.73047400  |
| H | -3.38899700 | -4.60719500 | 1.66098700  |
| H | -0.28116600 | 0.20958000  | 3.22180000  |
| H | 4.01464000  | 0.43754800  | 1.44951800  |

|   |             |             |             |
|---|-------------|-------------|-------------|
| H | -3.00970100 | 0.69652800  | 4.55240300  |
| H | -2.54606000 | 1.20472100  | 2.91284300  |
| H | -1.70864600 | 1.88054100  | 4.32695500  |
| H | -1.30863800 | -0.79171500 | 5.94720400  |
| H | -0.08159800 | 0.46456000  | 5.67443900  |
| H | 0.25285800  | -1.21932700 | 5.22647800  |
| H | 6.55549500  | 1.61352900  | 0.21069600  |
| H | 5.29618400  | 2.48661300  | 1.11566600  |
| H | 4.89000500  | 1.73052500  | -0.42862400 |
| H | 5.52978300  | -0.69494400 | 3.14413000  |
| H | 5.61364500  | 1.07864400  | 3.20957300  |
| H | 6.91847700  | 0.15311900  | 2.44020800  |
| H | 7.42549300  | -0.53123300 | 0.17946800  |
| H | 7.88621500  | -2.47566900 | -1.28824900 |
| H | 6.04380200  | -3.99107400 | -1.97421000 |
| H | -0.60236700 | -3.11498700 | -0.33254900 |
| H | 2.50091300  | -3.68323200 | -0.72443200 |
| H | -2.69774400 | -5.37061800 | -0.23646500 |
| H | -1.69582300 | -4.89005100 | -1.60889600 |
| H | -2.95780900 | -3.79083100 | -1.00893100 |
| H | -0.61628800 | -5.73816300 | 1.27340300  |
| H | 0.66761300  | -4.51534100 | 1.32180300  |
| H | 0.35892500  | -5.41370900 | -0.17833900 |
| H | 2.65105700  | -2.53545000 | -2.90147500 |
| H | 2.18562500  | -4.23733300 | -3.12709900 |
| H | 3.84996100  | -3.72201800 | -3.48003800 |
| H | 4.59123900  | -5.66421200 | -1.81213800 |
| H | 2.90465400  | -5.99964700 | -1.40072900 |
| H | 4.06453700  | -5.58450000 | -0.11867300 |
| H | 2.04872000  | 5.96869400  | -2.31935100 |
| H | 2.16456600  | 7.16012200  | -0.14324800 |
| H | 1.08864400  | 6.17990300  | 1.86904100  |
| H | 0.34665900  | 2.64692600  | -2.84340100 |
| H | -4.12800700 | 0.75515900  | 1.03070200  |
| H | 2.94275700  | 4.13831500  | -3.48244300 |
| H | 2.33877600  | 2.64298900  | -4.23398400 |
| H | 2.78604300  | 2.65006700  | -2.51190900 |
| H | -0.85929200 | 4.65325600  | -3.82205100 |
| H | 0.21556900  | 3.86848600  | -5.00216700 |
| H | 0.70425900  | 5.38471400  | -4.22116800 |
| H | -6.82552200 | -0.54162300 | 1.72065800  |
| H | -5.74416800 | 0.34640200  | 2.80229100  |
| H | -5.23145400 | -1.21719700 | 2.13819400  |
| H | -5.48106000 | 2.31330000  | -0.42563700 |
| H | -6.01051400 | 2.38070300  | 1.26782200  |
| H | -6.96524300 | 1.47860400  | 0.07038700  |
| H | -6.93684900 | -1.36805900 | -0.30689600 |
| H | -6.77420900 | -2.70484500 | -2.38871500 |
| H | -4.76558300 | -2.54470700 | -3.83436000 |
| H | -0.59367000 | 2.82011800  | 1.89084300  |
| H | -1.69734500 | -0.49026800 | -2.99646100 |
| H | 0.68905200  | 4.99677000  | 3.64071300  |

|   |             |             |             |
|---|-------------|-------------|-------------|
| H | 1.43538900  | 3.44709600  | 3.16849700  |
| H | -0.02156600 | 3.47100400  | 4.18544600  |
| H | -2.28694700 | 4.15370700  | 3.16742900  |
| H | -2.41931600 | 4.50091500  | 1.42811400  |
| H | -1.61869700 | 5.66159200  | 2.50349700  |
| H | -1.72866300 | -2.99088800 | -3.13843300 |
| H | -1.07328800 | -2.19201900 | -4.57574000 |
| H | -2.70340400 | -2.89277400 | -4.62418700 |
| H | -3.23793300 | 0.89668200  | -4.44741400 |
| H | -3.70074400 | -0.56630600 | -5.33985400 |
| H | -2.01954900 | 0.01837200  | -5.38820300 |
| O | 2.20998900  | 1.86853200  | 1.13335100  |
| O | 1.37005300  | 0.81773400  | 1.74821300  |
| O | 0.12276200  | 0.22184100  | -2.16195600 |

## Product for Ligand Cyclization

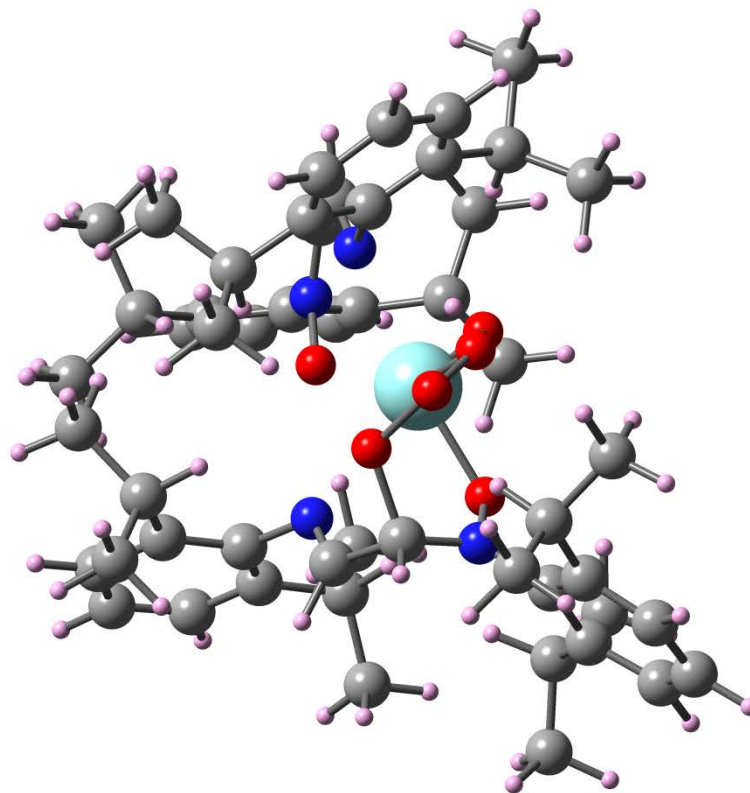

Fig. S64: NCCNO Product for Ligand Cyclization

| SCF            | E <sub>ZP</sub> | H            | G            |
|----------------|-----------------|--------------|--------------|
| -2741.39361929 | -2740.238217    | -2740.167323 | -2740.346083 |

|    |             |             |             |
|----|-------------|-------------|-------------|
| Zr | 0.41770300  | 0.37402900  | -0.62301100 |
| O  | -1.85555200 | -0.00022400 | -0.24554900 |
| O  | 1.84125800  | -1.17911400 | -0.83064100 |
| O  | 2.08487800  | 1.71937000  | -0.58054400 |
| N  | 0.14024500  | -1.44661300 | 1.44633600  |
| N  | 2.90607200  | -1.28045200 | 0.11702000  |
| N  | -0.65689000 | 2.63764000  | -0.24927800 |
| N  | -2.82862000 | 0.62448000  | -0.92980300 |
| C  | 1.32327000  | -1.63232800 | 1.94746400  |
| C  | 2.54086800  | -0.90189400 | 1.41632000  |
| C  | -1.82940100 | 2.88876600  | -0.76631700 |
| C  | -2.82394300 | 1.92042300  | -1.18176600 |
| C  | -0.96189500 | -2.19585000 | 2.03783000  |
| C  | -1.47019000 | -1.78526000 | 3.30410800  |
| C  | -2.49632200 | -2.55613600 | 3.88942200  |
| C  | -3.02448700 | -3.68168400 | 3.24072700  |
| C  | -2.53466300 | -4.04514900 | 1.97814400  |
| C  | -1.50079100 | -3.31658200 | 1.35286700  |
| C  | -2.11032600 | 0.39752500  | 4.45647800  |

|   |             |             |             |
|---|-------------|-------------|-------------|
| C | -0.95146800 | -0.54904500 | 4.05081800  |
| C | -0.12310600 | -0.95024400 | 5.30105100  |
| C | 6.04549400  | 1.41739600  | -0.32625400 |
| C | 5.46929200  | 0.30493600  | 0.58766600  |
| C | 6.29165400  | 0.18490200  | 1.89915100  |
| C | 4.18123900  | -1.77106600 | -0.35481000 |
| C | 5.38770900  | -1.03576700 | -0.14669800 |
| C | 6.59275600  | -1.56934200 | -0.65365300 |
| C | 6.62108200  | -2.76141800 | -1.38570100 |
| C | 5.42771300  | -3.46857300 | -1.58770500 |
| C | 4.20334400  | -3.01436400 | -1.05910300 |
| C | -2.10513600 | -3.77875900 | -1.07388600 |
| C | -0.98075500 | -3.78370600 | -0.00821200 |
| C | -0.34601500 | -5.19473800 | 0.09782800  |
| C | 2.43996100  | -3.76522400 | -2.72249200 |
| C | 2.95893100  | -3.88345400 | -1.26467100 |
| C | 3.22807000  | -5.36466300 | -0.88958200 |
| C | 0.15257400  | 3.82457200  | 0.04460800  |
| C | 0.69543800  | 4.57707500  | -1.03281100 |
| C | 1.42172500  | 5.74130700  | -0.70684100 |
| C | 1.61183800  | 6.13785400  | 0.62473700  |
| C | 1.08867300  | 5.35831400  | 1.66711400  |
| C | 0.35850800  | 4.18290800  | 1.40003700  |
| C | 2.00545400  | 3.92355200  | -3.10659200 |
| C | 0.59352400  | 4.14983300  | -2.50360700 |
| C | -0.21044200 | 5.17717700  | -3.34345600 |
| C | -5.46803000 | -0.86981300 | 2.04323600  |
| C | -4.99632200 | 0.14320300  | 0.97305100  |
| C | -5.86374400 | 1.43249000  | 1.02744500  |
| C | -3.97004400 | -0.20246700 | -1.37470900 |
| C | -5.00761500 | -0.44565600 | -0.44196000 |
| C | -6.10024600 | -1.21223500 | -0.89537900 |
| C | -6.14051000 | -1.70470700 | -2.21048300 |
| C | -5.09039300 | -1.44045000 | -3.10231000 |
| C | -3.96651300 | -0.68137400 | -2.70758400 |
| C | 0.76473400  | 3.12374500  | 3.69226400  |
| C | -0.24989400 | 3.37815000  | 2.55170000  |
| C | -1.52624800 | 4.08569000  | 3.08592600  |
| C | -2.38342900 | -1.63065600 | -4.48302100 |
| C | -2.84430300 | -0.37347400 | -3.70484000 |
| C | -3.29481200 | 0.73293500  | -4.69842000 |
| H | 1.50401500  | -2.35678300 | 2.74872500  |
| H | 3.38781000  | -0.96903300 | 2.09912000  |
| H | -2.13466500 | 3.92511300  | -0.93446600 |
| H | -3.68756800 | 2.29106500  | -1.71957400 |
| H | -2.88625600 | -2.27070300 | 4.86323300  |
| H | -3.80969500 | -4.26695300 | 3.71327400  |
| H | -2.94874400 | -4.91444800 | 1.47355300  |
| H | -0.29181500 | 0.01605000  | 3.38406100  |
| H | 4.46738800  | 0.63881300  | 0.84413100  |
| H | -2.79521000 | -0.07938400 | 5.16889800  |
| H | -2.69331800 | 0.70499900  | 3.57879100  |

|   |             |             |             |
|---|-------------|-------------|-------------|
| H | -1.71122000 | 1.29972600  | 4.93692000  |
| H | -0.73595100 | -1.51793000 | 6.01378500  |
| H | 0.25654000  | -0.05700300 | 5.81468100  |
| H | 0.73648800  | -1.57682500 | 5.03084800  |
| H | 7.07991100  | 1.20835800  | -0.63030900 |
| H | 6.03512200  | 2.37894600  | 0.20416800  |
| H | 5.43398000  | 1.52419000  | -1.22957700 |
| H | 5.87628200  | -0.57926700 | 2.57182100  |
| H | 6.29494800  | 1.14415900  | 2.43399500  |
| H | 7.33512700  | -0.09048900 | 1.69585600  |
| H | 7.51702700  | -1.02011800 | -0.49276300 |
| H | 7.55800500  | -3.13634200 | -1.79093000 |
| H | 5.45016900  | -4.40008100 | -2.14637000 |
| H | -0.20276300 | -3.09099200 | -0.34669700 |
| H | 2.16653000  | -3.50620300 | -0.61219800 |
| H | -2.89911800 | -4.49589100 | -0.82539500 |
| H | -1.69573300 | -4.06050600 | -2.05285300 |
| H | -2.55816100 | -2.78620500 | -1.16064700 |
| H | -1.08336800 | -5.93714600 | 0.43091200  |
| H | 0.48941900  | -5.20847000 | 0.80898000  |
| H | 0.03284200  | -5.51299900 | -0.88112400 |
| H | 2.18980000  | -2.72395300 | -2.94762400 |
| H | 1.53854900  | -4.37930900 | -2.86151900 |
| H | 3.19745000  | -4.11069200 | -3.43981100 |
| H | 3.96201500  | -5.83059600 | -1.55910100 |
| H | 2.30234200  | -5.94759800 | -0.96678500 |
| H | 3.60681400  | -5.45571800 | 0.13729100  |
| H | 1.85852900  | 6.33213700  | -1.50781900 |
| H | 2.17458200  | 7.04092300  | 0.84904300  |
| H | 1.25024500  | 5.66481600  | 2.69698600  |
| H | 0.08550700  | 3.18275800  | -2.57119200 |
| H | -3.96508100 | 0.41571900  | 1.22755300  |
| H | 2.58617100  | 4.85566100  | -3.14459200 |
| H | 1.91521200  | 3.53748800  | -4.13054200 |
| H | 2.55458700  | 3.19032000  | -2.50737900 |
| H | -1.23072900 | 5.31496400  | -2.95699800 |
| H | -0.28362200 | 4.83768600  | -4.38505100 |
| H | 0.27606800  | 6.16174000  | -3.34555300 |
| H | -6.52844900 | -1.12652900 | 1.92191100  |
| H | -5.34849500 | -0.43471200 | 3.04365400  |
| H | -4.87893600 | -1.79181200 | 2.00438700  |
| H | -5.51631100 | 2.18981100  | 0.31250800  |
| H | -5.82836900 | 1.87316600  | 2.03220300  |
| H | -6.91199000 | 1.20691100  | 0.79188200  |
| H | -6.92077100 | -1.42651900 | -0.21733800 |
| H | -6.99273700 | -2.29459700 | -2.53930400 |
| H | -5.13460100 | -1.83091700 | -4.11465900 |
| H | -0.55141700 | 2.39758800  | 2.16184700  |
| H | -1.96013200 | -0.00145200 | -3.17322700 |
| H | 1.07208400  | 4.05741600  | 4.18054500  |
| H | 1.65716800  | 2.62155900  | 3.30527800  |
| H | 0.31539400  | 2.48420600  | 4.46364300  |



|   |             |             |             |
|---|-------------|-------------|-------------|
| H | -1.99107000 | 3.49788700  | 3.88790300  |
| H | -2.27053100 | 4.22698900  | 2.29016800  |
| H | -1.27971600 | 5.07698400  | 3.48870400  |
| H | -2.08742000 | -2.43384700 | -3.79938300 |
| H | -1.51004400 | -1.37313000 | -5.09386500 |
| H | -3.16232100 | -2.01707300 | -5.15501500 |
| H | -3.57309500 | 1.66109100  | -4.18081000 |
| H | -4.15951400 | 0.40980600  | -5.29460300 |
| H | -2.47197500 | 0.96849500  | -5.38438000 |
| O | 2.66988200  | 1.67661600  | 0.77484200  |
| O | 1.92435800  | 0.56842800  | 1.50498900  |
| O | -0.07780000 | 0.57343700  | -2.36110400 |

## Oxo Peroxo Complex with Adsorbed Propylene Oxide (conformation 1)

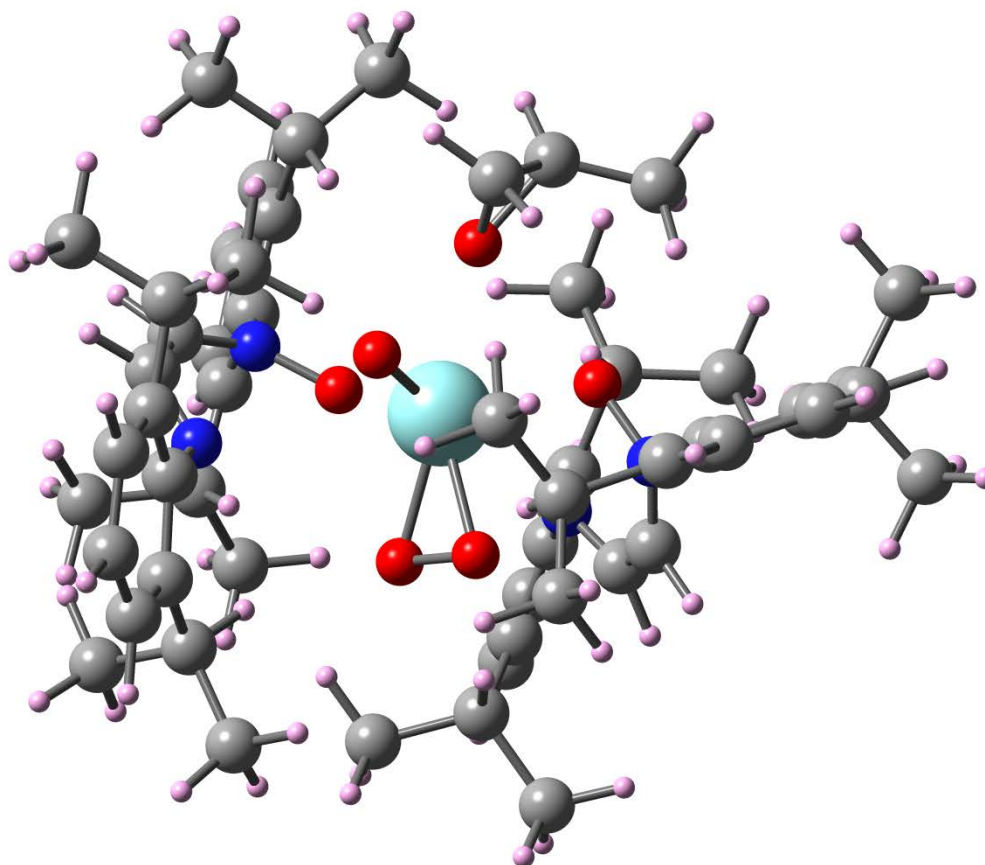

Fig. S65: NCCNO Oxo Peroxo Complex with Adsorbed Propylene Oxide (conformation 1)

| SCF            | E <sub>ZP</sub> | H            | G            |
|----------------|-----------------|--------------|--------------|
| -2859.32437701 | -2858.086119    | -2858.009634 | -2858.201418 |

|    |             |             |             |
|----|-------------|-------------|-------------|
| Zr | 0.42889000  | 0.27993700  | -0.27383800 |
| O  | -1.79907400 | -0.21058500 | -0.40084600 |
| O  | 2.44188900  | -0.68690300 | -0.71728600 |
| O  | 0.60462100  | 1.81480000  | -1.25280500 |
| N  | 0.74857300  | -1.98836100 | 1.28909700  |
| N  | 3.37853400  | -0.71289400 | 0.29635400  |
| N  | -1.77673300 | 2.85676900  | 0.01869500  |
| N  | -2.95375800 | 0.19152400  | -0.96787500 |
| C  | 1.86421400  | -1.81727600 | 1.95449600  |
| C  | 3.04493100  | -1.09571400 | 1.52185900  |
| C  | -2.67820300 | 2.69777200  | -0.90631600 |
| C  | -3.32907600 | 1.44003200  | -1.21165300 |
| C  | -0.26260600 | -2.83645800 | 1.87065300  |
| C  | -0.76409600 | -2.63682900 | 3.19470800  |
| C  | -1.70900000 | -3.56437200 | 3.68590100  |
| C  | -2.16268200 | -4.64021000 | 2.91058400  |
| C  | -1.68887700 | -4.79752700 | 1.59804000  |

|   |             |             |             |
|---|-------------|-------------|-------------|
| C | -0.74453200 | -3.90533100 | 1.05663000  |
| C | -1.62620400 | -0.61670400 | 4.47943900  |
| C | -0.37812500 | -1.45007400 | 4.09003500  |
| C | 0.38018900  | -1.91546100 | 5.36134600  |
| C | 3.93998500  | 3.17859900  | -0.71462200 |
| C | 4.17871800  | 2.16695900  | 0.43541700  |
| C | 4.72251800  | 2.88313100  | 1.69973900  |
| C | 4.73886200  | -0.32071400 | -0.06608800 |
| C | 5.11815700  | 1.04401300  | -0.00819600 |
| C | 6.44711300  | 1.35447200  | -0.37507500 |
| C | 7.34603100  | 0.35778100  | -0.78031500 |
| C | 6.93623700  | -0.98451800 | -0.83374400 |
| C | 5.62114500  | -1.35218400 | -0.48572500 |
| C | -1.22396600 | -4.62821600 | -1.36275200 |
| C | -0.16983000 | -4.13986900 | -0.34230900 |
| C | 1.02045100  | -5.13636100 | -0.26513700 |
| C | 5.56201100  | -3.49071100 | -1.88934000 |
| C | 5.19821800  | -2.82487100 | -0.53785000 |
| C | 5.82046600  | -3.61736300 | 0.64391500  |
| C | -1.20156600 | 4.12222600  | 0.29476900  |
| C | -0.75402900 | 5.02345500  | -0.72717400 |
| C | -0.24703100 | 6.27361500  | -0.31857700 |
| C | -0.16479700 | 6.62940900  | 1.03617000  |
| C | -0.54776600 | 5.70933400  | 2.02686800  |
| C | -1.04841100 | 4.44096000  | 1.68350400  |
| C | 0.74034200  | 4.79200000  | -2.77551600 |
| C | -0.70172100 | 4.66906400  | -2.22036400 |
| C | -1.69101600 | 5.53156300  | -3.04870800 |
| C | -4.82069300 | -1.63688200 | 2.36633000  |
| C | -4.70506400 | -0.61827000 | 1.20761900  |
| C | -5.81413800 | 0.46480500  | 1.32830400  |
| C | -3.92182600 | -0.89262200 | -1.23974600 |
| C | -4.76351600 | -1.28644800 | -0.17053600 |
| C | -5.71341200 | -2.29337300 | -0.44134900 |
| C | -5.80883500 | -2.87327900 | -1.71581100 |
| C | -4.95308700 | -2.46052800 | -2.74880300 |
| C | -3.98012200 | -1.46026000 | -2.53461000 |
| C | -0.63705600 | 3.52274000  | 4.04467400  |
| C | -1.48227700 | 3.43934200  | 2.75448000  |
| C | -2.99268000 | 3.60628300  | 3.07988500  |
| C | -2.58482800 | -2.16868600 | -4.55910500 |
| C | -3.07789300 | -0.99150300 | -3.68200900 |
| C | -3.81525700 | 0.04845900  | -4.57175200 |
| H | 1.98839200  | -2.25897300 | 2.94850500  |
| H | 3.83219300  | -0.98673000 | 2.26078000  |
| H | -3.09106400 | 3.53911200  | -1.47580000 |
| H | -4.28601600 | 1.50966500  | -1.71891000 |
| H | -2.10015000 | -3.43375200 | 4.69213700  |
| H | -2.88375800 | -5.34384200 | 3.32047600  |
| H | -2.05306700 | -5.62467100 | 0.99492500  |
| H | 0.25657200  | -0.76403300 | 3.52449100  |
| H | 3.20421600  | 1.75142000  | 0.70147600  |

|   |             |             |             |
|---|-------------|-------------|-------------|
| H | -2.35749000 | -1.20568600 | 5.04997500  |
| H | -2.11062000 | -0.22336900 | 3.57916500  |
| H | -1.32281100 | 0.23859000  | 5.09732800  |
| H | -0.24926900 | -2.55839300 | 5.99185900  |
| H | 0.68093900  | -1.04659100 | 5.96187300  |
| H | 1.28585400  | -2.48678400 | 5.11384300  |
| H | 4.87668100  | 3.65047000  | -1.04461300 |
| H | 3.25781900  | 3.96622900  | -0.37369300 |
| H | 3.46636700  | 2.68658100  | -1.57103100 |
| H | 4.86681400  | 2.17765600  | 2.52862800  |
| H | 4.00235800  | 3.64282800  | 2.02740700  |
| H | 5.68179100  | 3.38382600  | 1.50783000  |
| H | 6.77533400  | 2.38958300  | -0.33855300 |
| H | 8.36410700  | 0.62454600  | -1.05475600 |
| H | 7.64092400  | -1.74853400 | -1.15117900 |
| H | 0.22594400  | -3.18241800 | -0.69744300 |
| H | 4.10825000  | -2.87897100 | -0.43708000 |
| H | -1.58747200 | -5.63778700 | -1.12932500 |
| H | -0.78223600 | -4.67033000 | -2.36866600 |
| H | -2.08758200 | -3.95289600 | -1.39385700 |
| H | 0.68742400  | -6.11140400 | 0.11554200  |
| H | 1.80457800  | -4.76212800 | 0.40520900  |
| H | 1.46585800  | -5.29390700 | -1.25752700 |
| H | 5.13962700  | -2.93133900 | -2.73268700 |
| H | 5.16641400  | -4.51456400 | -1.92216500 |
| H | 6.64813100  | -3.55154700 | -2.03431600 |
| H | 6.91704700  | -3.60508600 | 0.59060000  |
| H | 5.49047400  | -4.66452400 | 0.62104400  |
| H | 5.52870500  | -3.18873500 | 1.61128400  |
| H | 0.10272900  | 6.97402700  | -1.07312400 |
| H | 0.21723600  | 7.60804200  | 1.31890700  |
| H | -0.44381900 | 5.97758300  | 3.07380100  |
| H | -0.95683000 | 3.61275900  | -2.33882700 |
| H | -3.73346700 | -0.12338300 | 1.31321100  |
| H | 1.14090400  | 5.81002800  | -2.68020800 |
| H | 0.75176100  | 4.52684700  | -3.84279600 |
| H | 1.38751800  | 4.09005400  | -2.24205700 |
| H | -2.72567500 | 5.43290700  | -2.69057800 |
| H | -1.66472000 | 5.23470500  | -4.10641500 |
| H | -1.42851000 | 6.59670100  | -2.99379000 |
| H | -5.80948100 | -2.11405900 | 2.39489900  |
| H | -4.67745400 | -1.12163300 | 3.32411700  |
| H | -4.05814100 | -2.41867800 | 2.28731100  |
| H | -5.72839800 | 1.22627300  | 0.54281600  |
| H | -5.74081100 | 0.97298100  | 2.29818400  |
| H | -6.81232300 | 0.01260700  | 1.25309400  |
| H | -6.37857600 | -2.62550500 | 0.34983900  |
| H | -6.54967300 | -3.64660900 | -1.90448800 |
| H | -5.03965200 | -2.92240500 | -3.72769300 |
| H | -1.32635700 | 2.44085000  | 2.33279800  |
| H | -2.19051600 | -0.51403500 | -3.25007800 |
| H | -0.79461900 | 4.46131300  | 4.59555600  |

|   |             |             |             |
|---|-------------|-------------|-------------|
| H | 0.43047100  | 3.42176000  | 3.81642000  |
| H | -0.91392400 | 2.69799400  | 4.71428300  |
| H | -3.30772400 | 2.85494200  | 3.81761100  |
| H | -3.61103200 | 3.48042600  | 2.18154500  |
| H | -3.20037100 | 4.60168300  | 3.49821300  |
| H | -2.08640700 | -2.93510900 | -3.95426300 |
| H | -1.87642800 | -1.79968000 | -5.31257200 |
| H | -3.40891000 | -2.64634600 | -5.10403900 |
| H | -4.12128100 | 0.93311500  | -4.00080700 |
| H | -4.71671200 | -0.39049600 | -5.01982100 |
| H | -3.16050500 | 0.38682700  | -5.38574200 |
| O | 1.46608200  | 0.80490700  | 1.55744200  |
| O | -0.00902000 | 0.67094300  | 1.76200000  |
| C | 1.17346700  | -0.10847000 | -3.52248100 |
| H | 0.65091500  | 0.58532900  | -4.17430100 |
| C | 0.93647900  | -1.57669500 | -3.61659500 |
| H | 0.18601000  | -1.90862700 | -4.33113000 |
| O | 0.26951300  | -0.76623200 | -2.50675900 |
| H | 2.09989200  | 0.25160300  | -3.08827800 |
| C | 1.97617700  | -2.59762000 | -3.22768300 |
| H | 1.50636400  | -3.52666100 | -2.88589800 |
| H | 2.59477700  | -2.83338100 | -4.10582200 |
| H | 2.60946200  | -2.20411600 | -2.42953700 |

## Oxo Peroxo Complex with Adsorbed Propylene Oxide (conformation 2)

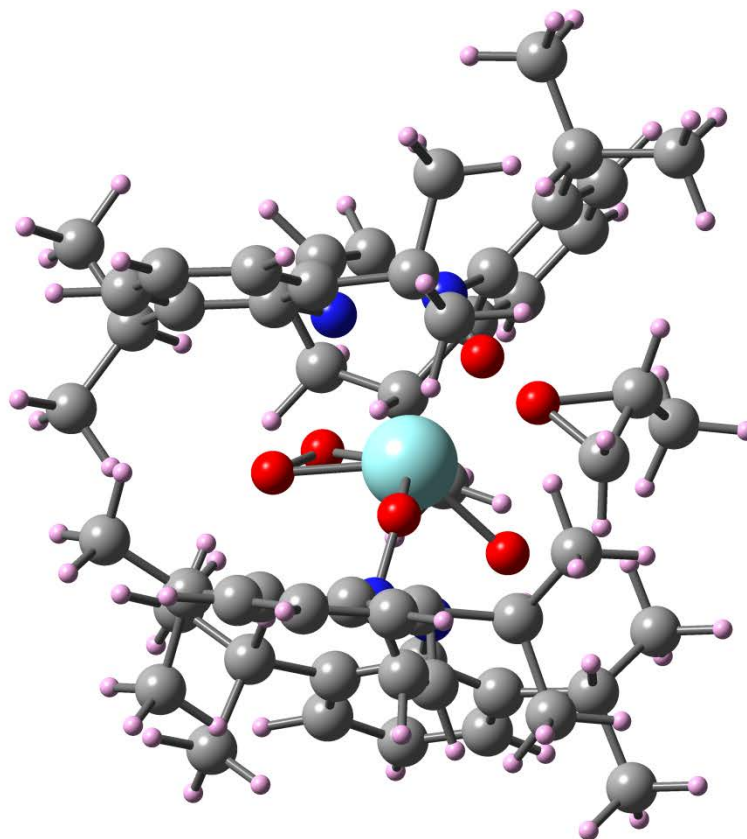

Fig. S66: NCCNO Oxo Peroxo Complex with Adsorbed Propylene Oxide (conformation 2)

| SCF           | E <sub>ZP</sub> | H            | G            |
|---------------|-----------------|--------------|--------------|
| -2859.3224482 | -2858.082065    | -2858.007122 | -2858.192347 |

|    |             |             |             |
|----|-------------|-------------|-------------|
| Zr | 0.12590200  | 0.06677700  | -0.13748000 |
| O  | -1.87588100 | 0.18462000  | -0.70067600 |
| O  | 2.16449400  | -0.88151800 | -0.70898000 |
| O  | 0.67324800  | 1.73517800  | -1.25105000 |
| N  | 0.05290500  | -2.35305800 | 0.67091700  |
| N  | 2.97466300  | -1.59630100 | 0.09563200  |
| N  | -0.06598300 | 2.48347000  | -0.14792000 |
| N  | -2.88931700 | 1.17914500  | -0.51881500 |
| C  | 1.14353000  | -2.85329600 | 1.20548600  |
| C  | 2.51438100  | -2.45101400 | 0.99161400  |
| C  | -1.30589400 | 3.09983900  | -0.55886000 |
| C  | -2.53237600 | 2.49940900  | -0.64082900 |
| C  | -1.18810600 | -3.00809600 | 1.06394600  |
| C  | -1.54779400 | -3.12634800 | 2.44316500  |
| C  | -2.74528200 | -3.80930500 | 2.74566000  |
| C  | -3.55896600 | -4.35558200 | 1.74409700  |
| C  | -3.18736100 | -4.22342700 | 0.39819300  |
| C  | -2.00426300 | -3.55289600 | 0.03260000  |

|   |             |             |             |
|---|-------------|-------------|-------------|
| C | -1.58103700 | -1.55393800 | 4.45588900  |
| C | -0.73791000 | -2.54354900 | 3.61291000  |
| C | -0.16629600 | -3.67071700 | 4.51585000  |
| C | 4.61966000  | 1.98294800  | 1.31577600  |
| C | 4.38515600  | 0.48668100  | 1.64079100  |
| C | 4.84108000  | 0.15860100  | 3.08786700  |
| C | 4.41779700  | -1.41687400 | -0.11460500 |
| C | 5.09073900  | -0.41974700 | 0.62929900  |
| C | 6.48057100  | -0.29661000 | 0.40996800  |
| C | 7.14673200  | -1.11768700 | -0.51205600 |
| C | 6.43845400  | -2.08400400 | -1.24586100 |
| C | 5.05020200  | -2.25277100 | -1.06833000 |
| C | -2.72463000 | -3.23127400 | -2.40622500 |
| C | -1.56202900 | -3.52737000 | -1.43115200 |
| C | -0.86180100 | -4.86587700 | -1.79769500 |
| C | 4.54325600  | -3.19273200 | -3.38964500 |
| C | 4.29216900  | -3.32075000 | -1.86545400 |
| C | 4.66174700  | -4.74497200 | -1.36903200 |
| C | 0.83106500  | 3.47147000  | 0.49036000  |
| C | 1.67360100  | 4.30228200  | -0.30773500 |
| C | 2.53659800  | 5.20436300  | 0.35111700  |
| C | 2.53605600  | 5.33320000  | 1.74646700  |
| C | 1.63275700  | 4.57654600  | 2.50435500  |
| C | 0.75872800  | 3.64550300  | 1.90148800  |
| C | 3.03365400  | 3.87435400  | -2.41812700 |
| C | 1.66713200  | 4.32790300  | -1.84469400 |
| C | 1.28548700  | 5.73410300  | -2.37996600 |
| C | -4.96301700 | -0.63257900 | 2.79020100  |
| C | -4.42482500 | 0.44228100  | 1.81858200  |
| C | -4.69893900 | 1.86170000  | 2.39056900  |
| C | -4.24461100 | 0.71955600  | -0.72840900 |
| C | -5.00646300 | 0.32988100  | 0.40727400  |
| C | -6.33652600 | -0.09260000 | 0.20346400  |
| C | -6.89629400 | -0.12497500 | -1.08399300 |
| C | -6.13276200 | 0.26716400  | -2.19301600 |
| C | -4.79408800 | 0.68802100  | -2.03990500 |
| C | 0.30940000  | 2.32396100  | 4.05253600  |
| C | -0.29407000 | 2.96524800  | 2.77998500  |
| C | -1.40028700 | 3.99207700  | 3.15113900  |
| C | -4.05422800 | 0.10116500  | -4.41802700 |
| C | -4.00168400 | 1.14140800  | -3.27003300 |
| C | -4.50991800 | 2.51787100  | -3.78000700 |
| H | 1.06041200  | -3.70201100 | 1.88734800  |
| H | 3.27166800  | -2.95534300 | 1.58036100  |
| H | -1.26525500 | 4.17237200  | -0.72664800 |
| H | -3.38182900 | 3.15511200  | -0.81982200 |
| H | -3.04622800 | -3.90622300 | 3.78557300  |
| H | -4.47425100 | -4.87917100 | 2.01007600  |
| H | -3.81867900 | -4.65134900 | -0.37505500 |
| H | 0.08921100  | -1.94829400 | 3.21836500  |
| H | 3.30484100  | 0.31868300  | 1.59814400  |
| H | -2.46995500 | -2.03002000 | 4.89110900  |

|   |             |             |             |
|---|-------------|-------------|-------------|
| H | -1.88975800 | -0.71014500 | 3.83253100  |
| H | -0.97181500 | -1.15902600 | 5.28006400  |
| H | -0.97105100 | -4.25114700 | 4.98642900  |
| H | 0.44668900  | -3.23743500 | 5.31745000  |
| H | 0.45857900  | -4.37867100 | 3.95284400  |
| H | 5.67593700  | 2.26527300  | 1.42721100  |
| H | 4.02759800  | 2.60711100  | 1.99428200  |
| H | 4.30433400  | 2.21999800  | 0.29343400  |
| H | 4.63660400  | -0.88855400 | 3.34881300  |
| H | 4.29821800  | 0.79413300  | 3.79808300  |
| H | 5.91683000  | 0.33678600  | 3.22212700  |
| H | 7.03895000  | 0.45288400  | 0.96356800  |
| H | 8.21750600  | -1.00338200 | -0.66300900 |
| H | 6.96707400  | -2.70709400 | -1.96223100 |
| H | -0.82722900 | -2.72855800 | -1.55671700 |
| H | 3.21627400  | -3.18058000 | -1.70854400 |
| H | -3.47110100 | -4.03643600 | -2.42050200 |
| H | -2.33630000 | -3.13344700 | -3.43005000 |
| H | -3.22776800 | -2.29729100 | -2.13278400 |
| H | -1.55338200 | -5.71319100 | -1.69577700 |
| H | 0.00071400  | -5.05680800 | -1.14499900 |
| H | -0.50495500 | -4.84082300 | -2.83681800 |
| H | 4.28352000  | -2.19068100 | -3.75166300 |
| H | 3.93278600  | -3.92527000 | -3.93388000 |
| H | 5.59325300  | -3.38171100 | -3.64637100 |
| H | 5.72918100  | -4.95045000 | -1.52214900 |
| H | 4.08830700  | -5.50318300 | -1.91815700 |
| H | 4.44888500  | -4.86590900 | -0.29899700 |
| H | 3.20157000  | 5.82765600  | -0.24226500 |
| H | 3.20900900  | 6.03573000  | 2.23335000  |
| H | 1.59332000  | 4.71282800  | 3.58167500  |
| H | 0.92000100  | 3.61950800  | -2.20198300 |
| H | -3.33852300 | 0.32010900  | 1.74204900  |
| H | 3.84317200  | 4.55182000  | -2.11387000 |
| H | 3.00576600  | 3.85942400  | -3.51709100 |
| H | 3.27874700  | 2.86687200  | -2.06302700 |
| H | 0.30940300  | 6.05597900  | -1.99319400 |
| H | 1.22768400  | 5.71639200  | -3.47745800 |
| H | 2.02290400  | 6.49680400  | -2.09752200 |
| H | -6.03170600 | -0.49342600 | 3.00400700  |
| H | -4.42899100 | -0.56527600 | 3.74584500  |
| H | -4.81549300 | -1.64266600 | 2.39111700  |
| H | -4.25309500 | 2.63943300  | 1.76044300  |
| H | -4.26848200 | 1.95578000  | 3.39631900  |
| H | -5.77927500 | 2.05086200  | 2.46109600  |
| H | -6.94056800 | -0.39530400 | 1.05339000  |
| H | -7.92548100 | -0.45022900 | -1.22054800 |
| H | -6.57929100 | 0.24458400  | -3.18432400 |
| H | -0.75394000 | 2.15417400  | 2.21424400  |
| H | -2.95553900 | 1.25899700  | -2.97179900 |
| H | 0.76474100  | 3.06873000  | 4.72085400  |
| H | 1.06003600  | 1.57911200  | 3.77087200  |



|   |             |             |             |
|---|-------------|-------------|-------------|
| H | -0.48073900 | 1.81006100  | 4.61595200  |
| H | -2.18425400 | 3.50445400  | 3.74630600  |
| H | -1.86752200 | 4.41376000  | 2.25203000  |
| H | -0.99125000 | 4.82239500  | 3.74370300  |
| H | -3.73713900 | -0.88977800 | -4.07275300 |
| H | -3.39869500 | 0.41295300  | -5.24324500 |
| H | -5.06784000 | 0.00308500  | -4.82758600 |
| H | -4.43452500 | 3.28749700  | -3.00248100 |
| H | -5.56139100 | 2.45684800  | -4.09057400 |
| H | -3.91887800 | 2.85014000  | -4.64436600 |
| O | 1.13428100  | 0.18850300  | 1.67691600  |
| O | -0.36922000 | -0.01518400 | 1.88639900  |
| C | -0.48641400 | -0.15616600 | -3.56461200 |
| H | -1.31235700 | -0.71129000 | -3.99602700 |
| C | 0.91427700  | -0.66746400 | -3.66444400 |
| H | 1.05270600  | -1.63818500 | -4.14076000 |
| O | 0.12464200  | -0.83312900 | -2.37351300 |
| H | -0.63677900 | 0.90778000  | -3.40649800 |
| C | 2.10906800  | 0.25389800  | -3.65751700 |
| H | 2.96437600  | -0.22323700 | -3.17002200 |
| H | 2.37996800  | 0.49445300  | -4.69603000 |
| H | 1.88348300  | 1.17655700  | -3.11824400 |

## 5.6 Structures with seven oxygen atoms

Peroxo  $\eta^2$ -Ozone Complex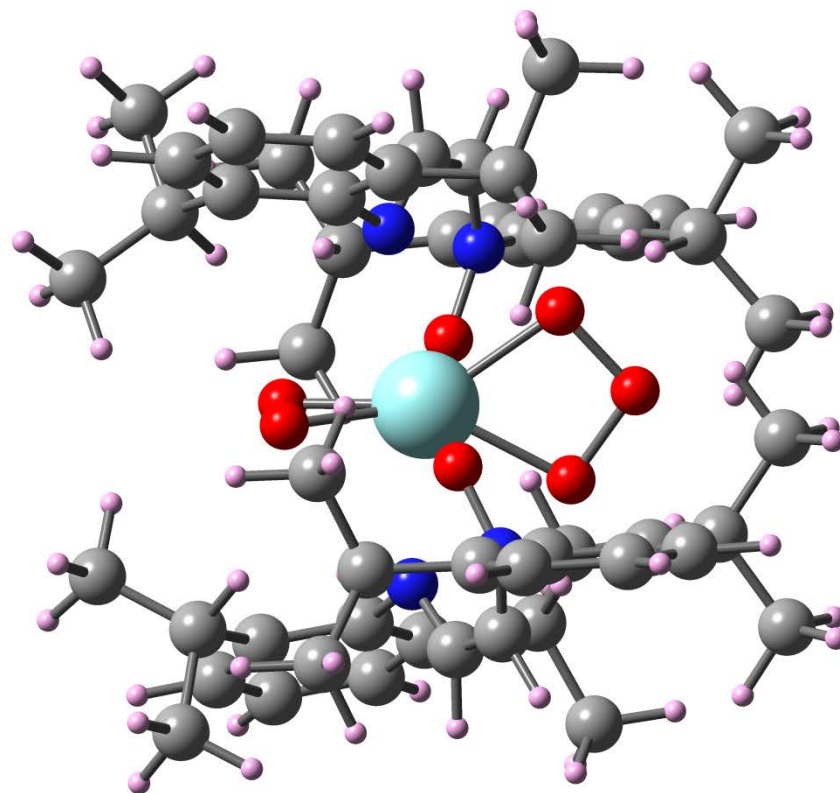Fig. S67: NCCNO Peroxo  $\eta^2$ -Ozone Complex

| SCF          | $E_{ZP}$     | H            | G            |
|--------------|--------------|--------------|--------------|
| -2816.565471 | -2815.407322 | -2815.334599 | -2815.519456 |

|    |             |             |             |
|----|-------------|-------------|-------------|
| Zr | -0.00032300 | 0.00080700  | 0.24429300  |
| O  | -2.21780200 | 0.30451400  | -0.12929600 |
| O  | 2.21790100  | -0.30629500 | -0.12959800 |
| O  | -0.00986400 | 1.16549300  | -1.63786400 |
| N  | 0.17269000  | -2.41526900 | 0.58455500  |
| N  | 2.84133000  | -1.38147000 | -0.61518600 |
| N  | -0.17517200 | 2.41906600  | 0.57788500  |
| N  | -2.84161900 | 1.37747500  | -0.62078100 |
| C  | 1.15375900  | -3.10586200 | 0.07212100  |
| C  | 2.36266000  | -2.61683800 | -0.56637500 |
| C  | -1.15481100 | 3.10623800  | 0.05795000  |
| C  | -2.36287600 | 2.61296200  | -0.57876500 |
| C  | -0.89041600 | -3.17859500 | 1.25039500  |
| C  | -0.82683700 | -3.33695600 | 2.66187600  |
| C  | -1.85345600 | -4.07650200 | 3.28325000  |

|   |             |             |             |
|---|-------------|-------------|-------------|
| C | -2.90572800 | -4.63349600 | 2.54007200  |
| C | -2.93924100 | -4.46776600 | 1.14902500  |
| C | -1.93624000 | -3.74182300 | 0.46898200  |
| C | -0.12636400 | -2.09220000 | 4.78715500  |
| C | 0.34112000  | -2.79939600 | 3.49353500  |
| C | 1.34089400  | -3.94406600 | 3.81679600  |
| C | 5.28416300  | 0.53996600  | 1.77013800  |
| C | 5.08189800  | -0.89060200 | 1.20306300  |
| C | 6.04163600  | -1.90122700 | 1.88226500  |
| C | 4.16221200  | -1.11735100 | -1.20881700 |
| C | 5.24196000  | -0.89215800 | -0.32084100 |
| C | 6.50082800  | -0.64389600 | -0.90551600 |
| C | 6.65778000  | -0.62114000 | -2.30111200 |
| C | 5.55686400  | -0.83337500 | -3.14512400 |
| C | 4.26933500  | -1.07684800 | -2.61932300 |
| C | -3.36691900 | -3.07042500 | -1.53756200 |
| C | -2.00346800 | -3.62910300 | -1.05924700 |
| C | -1.71421400 | -5.00343900 | -1.72223200 |
| C | 2.89577700  | -0.04772000 | -4.49632400 |
| C | 3.07505200  | -1.27029900 | -3.56044900 |
| C | 3.22286500  | -2.57814600 | -4.38279600 |
| C | 0.88741700  | 3.18725600  | 1.23873400  |
| C | 1.92830000  | 3.75455600  | 0.45360700  |
| C | 2.93009000  | 4.48578900  | 1.12992400  |
| C | 2.90015200  | 4.65309100  | 2.52075500  |
| C | 1.85259700  | 4.09220300  | 3.26773500  |
| C | 0.82750300  | 3.34736700  | 2.65030500  |
| C | 3.35409300  | 3.06447600  | -1.54828300 |
| C | 1.99507900  | 3.63835400  | -1.07443600 |
| C | 1.71978600  | 5.01310100  | -1.74192500 |
| C | -5.27926400 | -0.53324700 | 1.77035800  |
| C | -5.08388400 | 0.89641400  | 1.19809800  |
| C | -6.04888200 | 1.90473600  | 1.87285900  |
| C | -4.16166700 | 1.10943900  | -1.21390200 |
| C | -5.24253100 | 0.89009200  | -0.32593600 |
| C | -6.50059800 | 0.63736400  | -0.91065000 |
| C | -6.65548700 | 0.60445700  | -2.30622100 |
| C | -5.55330900 | 0.81065000  | -3.15022900 |
| C | -4.26679400 | 1.05854200  | -2.62433500 |
| C | 0.13437600  | 2.10819800  | 4.78163300  |
| C | -0.33696200 | 2.80760700  | 3.48523500  |
| C | -1.34204400 | 3.94888800  | 3.80425100  |
| C | -2.89307700 | 0.02502600  | -4.50015500 |
| C | -3.07112300 | 1.24776600  | -3.56451700 |
| C | -3.21546100 | 2.55567500  | -4.38757600 |
| H | 1.11844400  | -4.19780500 | 0.12492100  |
| H | 3.01296000  | -3.36506500 | -1.00363400 |
| H | -1.11878400 | 4.19858700  | 0.10168400  |
| H | -3.01271200 | 3.35861400  | -1.02111600 |
| H | -1.82754300 | -4.21503400 | 4.36056500  |
| H | -3.68930100 | -5.19717500 | 3.04148600  |
| H | -3.75116600 | -4.90915100 | 0.57654800  |

|   |             |             |             |
|---|-------------|-------------|-------------|
| H | 0.85871400  | -2.03328800 | 2.90986300  |
| H | 4.05787600  | -1.18450600 | 1.45738600  |
| H | -0.62274000 | -2.77850500 | 5.48743700  |
| H | -0.80989500 | -1.27603500 | 4.53354100  |
| H | 0.74049600  | -1.65997500 | 5.30470700  |
| H | 0.86587100  | -4.72758000 | 4.42365100  |
| H | 2.19827700  | -3.55155100 | 4.38023900  |
| H | 1.72395600  | -4.42060600 | 2.90291300  |
| H | 6.29601900  | 0.91175400  | 1.55930400  |
| H | 5.14073700  | 0.53656200  | 2.85799700  |
| H | 4.55948900  | 1.23786500  | 1.33736200  |
| H | 5.89722400  | -2.91826600 | 1.49466100  |
| H | 5.85919000  | -1.91933500 | 2.96430900  |
| H | 7.09352600  | -1.62822500 | 1.72753500  |
| H | 7.36048600  | -0.46782400 | -0.26475100 |
| H | 7.63833300  | -0.43052800 | -2.73086200 |
| H | 5.69189700  | -0.79775300 | -4.22259200 |
| H | -1.24502400 | -2.92022700 | -1.40361000 |
| H | 2.15339800  | -1.34223200 | -2.97529700 |
| H | -4.20241700 | -3.73270200 | -1.27331300 |
| H | -3.36196300 | -2.96168400 | -2.63045600 |
| H | -3.55444500 | -2.08382600 | -1.09945000 |
| H | -2.46508200 | -5.75258900 | -1.43576000 |
| H | -0.72943000 | -5.39361500 | -1.43008900 |
| H | -1.72995400 | -4.90775700 | -2.81624300 |
| H | 2.74496100  | 0.86663200  | -3.91270800 |
| H | 2.00603200  | -0.19183500 | -5.12088800 |
| H | 3.76107400  | 0.09440200  | -5.15823100 |
| H | 4.11058600  | -2.54878900 | -5.02885600 |
| H | 2.34269100  | -2.71836900 | -5.02277700 |
| H | 3.31186300  | -3.45946500 | -3.73298100 |
| H | 3.73825500  | 4.93010500  | 0.55435200  |
| H | 3.68268100  | 5.22095700  | 3.01906100  |
| H | 1.82896100  | 4.23225700  | 4.34488700  |
| H | 1.23110200  | 2.93528200  | -1.41810300 |
| H | -4.06146400 | 1.19636500  | 1.45197500  |
| H | 4.19574400  | 3.71741400  | -1.28022100 |
| H | 3.35217800  | 2.95585600  | -2.64124900 |
| H | 3.52872500  | 2.07575700  | -1.10966900 |
| H | 0.73948500  | 5.41452500  | -1.44992100 |
| H | 1.73337800  | 4.91289100  | -2.83553900 |
| H | 2.47871100  | 5.75565300  | -1.45975000 |
| H | -6.28901200 | -0.91081200 | 1.55972100  |
| H | -5.13684600 | -0.52528300 | 2.85833300  |
| H | -4.55056600 | -1.22891900 | 1.34075200  |
| H | -5.90873600 | 2.92111700  | 1.48193200  |
| H | -5.86745900 | 1.92735600  | 2.95497900  |
| H | -7.09942500 | 1.62656400  | 1.71829700  |
| H | -7.36105600 | 0.46547700  | -0.26982300 |
| H | -7.63534700 | 0.41040500  | -2.73601300 |
| H | -5.68670100 | 0.76670500  | -4.22760200 |
| H | -0.85135300 | 2.03682700  | 2.90488500  |

|   |             |             |             |
|---|-------------|-------------|-------------|
| H | -2.14998000 | 1.31786700  | -2.97839700 |
| H | 0.62741400  | 2.79979600  | 5.47905700  |
| H | 0.82188300  | 1.29425400  | 4.53151000  |
| H | -0.73030700 | 1.67402800  | 5.30118400  |
| H | -2.19688100 | 3.55461700  | 4.37034200  |
| H | -1.72841000 | 4.41921900  | 2.88855300  |
| H | -0.87027100 | 4.73754600  | 4.40699700  |
| H | -2.74580700 | -0.89000100 | -3.91661500 |
| H | -2.00165100 | 0.16737100  | -5.12273800 |
| H | -3.75703600 | -0.11499500 | -5.16424500 |
| H | -3.30322100 | 3.43758800  | -3.73841100 |
| H | -4.10290600 | 2.52757800  | -5.03408100 |
| H | -2.33449600 | 2.69392600  | -5.02690200 |
| O | 0.77215000  | 0.05212100  | 2.15161600  |
| O | -0.77033100 | -0.04664700 | 2.15312400  |
| O | 0.00700300  | -0.00056800 | -2.57386300 |
| O | 0.01342000  | -1.16683200 | -1.63685400 |

Peroxo  $\eta^3$ -Ozone Complex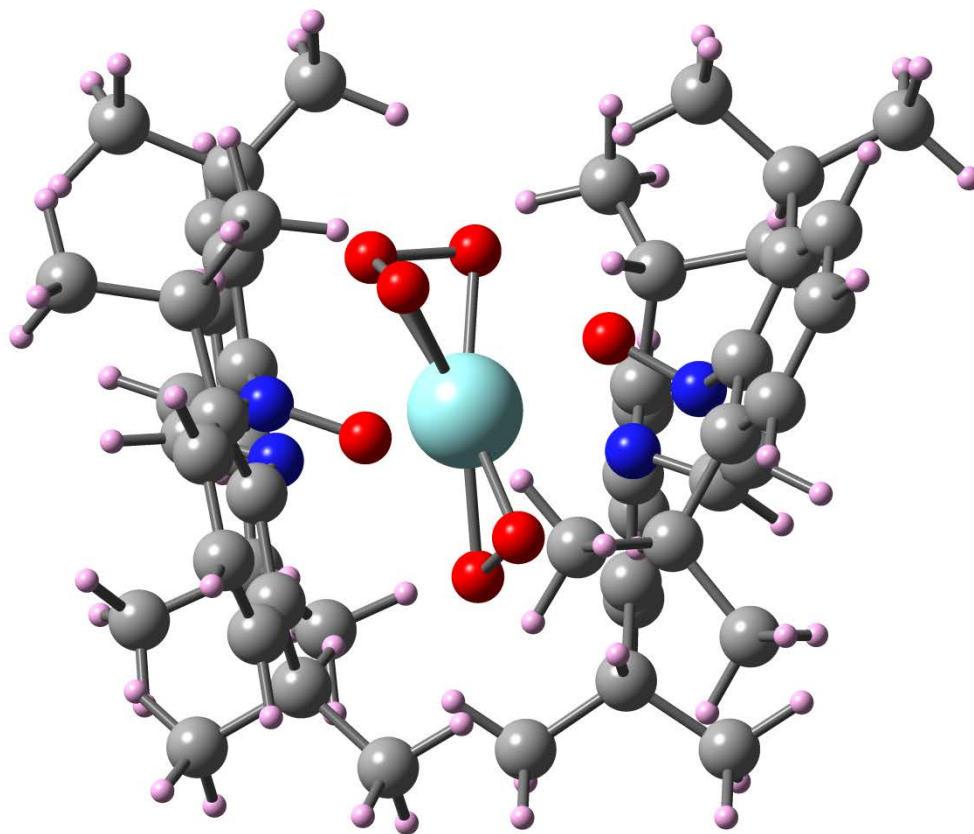Fig. S68: NCCNO Peroxo  $\eta^3$ -Ozone Complex

| SCF           | $E_{ZP}$     | H            | G            |
|---------------|--------------|--------------|--------------|
| -2816.5525653 | -2815.394732 | -2815.322332 | -2815.504574 |

|    |             |             |             |
|----|-------------|-------------|-------------|
| Zr | 0.19934600  | 0.09377000  | -0.12801100 |
| O  | -2.07463400 | 0.30494600  | 0.12604800  |
| O  | 2.15678600  | -1.02440500 | -0.78727500 |
| O  | 1.01840800  | 1.11189300  | -1.86914100 |
| N  | 0.13650200  | -2.20142600 | 0.82179900  |
| N  | 3.00378600  | -1.69733800 | 0.00102000  |
| N  | -0.28165800 | 2.61174300  | 0.01669700  |
| N  | -2.91190300 | 1.15353700  | -0.48610600 |
| C  | 1.21819400  | -2.74959100 | 1.32505400  |
| C  | 2.59273500  | -2.44457300 | 1.01346700  |
| C  | -1.40179300 | 3.12802500  | -0.41056400 |
| C  | -2.62805300 | 2.42231400  | -0.72576600 |
| C  | -1.12067200 | -2.84373900 | 1.20834700  |
| C  | -1.57624800 | -2.79585600 | 2.55703100  |
| C  | -2.78457100 | -3.46256000 | 2.86099300  |
| C  | -3.50806200 | -4.15524000 | 1.88217800  |
| C  | -3.02573600 | -4.20608600 | 0.56447500  |

|   |             |             |             |
|---|-------------|-------------|-------------|
| C | -1.82638600 | -3.56320800 | 0.20036100  |
| C | -1.72254200 | -0.97913600 | 4.33625400  |
| C | -0.83648100 | -2.07447700 | 3.69175400  |
| C | -0.34071400 | -3.08006900 | 4.76552900  |
| C | 5.05452100  | 1.54359300  | 1.44203200  |
| C | 4.76817800  | 0.03258700  | 1.64332300  |
| C | 5.39610500  | -0.47641900 | 2.96757200  |
| C | 4.42483600  | -1.58951500 | -0.35498900 |
| C | 5.26744400  | -0.78110300 | 0.44421200  |
| C | 6.62786300  | -0.72175700 | 0.06846200  |
| C | 7.10050300  | -1.41025000 | -1.05818800 |
| C | 6.22203700  | -2.17191700 | -1.84726500 |
| C | 4.85644900  | -2.27968900 | -1.51600100 |
| C | -2.32708500 | -3.90776900 | -2.30048200 |
| C | -1.24835700 | -3.73744000 | -1.20784000 |
| C | -0.27197500 | -4.94779000 | -1.23776200 |
| C | 3.49433100  | -2.19482200 | -3.64116300 |
| C | 3.89291700  | -3.06193800 | -2.41410400 |
| C | 4.46608600  | -4.43025900 | -2.85696700 |
| C | 0.80278400  | 3.56401000  | 0.27460600  |
| C | 1.42156800  | 4.26078100  | -0.80586900 |
| C | 2.47967000  | 5.14205300  | -0.48941700 |
| C | 2.89404000  | 5.35162900  | 0.83176400  |
| C | 2.23550800  | 4.69004300  | 1.87900600  |
| C | 1.18147500  | 3.78993000  | 1.62904800  |
| C | 2.19210300  | 3.74097300  | -3.18812100 |
| C | 1.00380700  | 4.14247800  | -2.27909700 |
| C | 0.36011600  | 5.46783200  | -2.77318500 |
| C | -5.27964900 | -0.43800600 | 2.63315900  |
| C | -4.84514000 | 0.68216700  | 1.65810600  |
| C | -5.52146800 | 2.03004500  | 2.03664900  |
| C | -4.22971600 | 0.60376800  | -0.85458900 |
| C | -5.14487300 | 0.33765600  | 0.19501600  |
| C | -6.39775700 | -0.19085300 | -0.17345400 |
| C | -6.70979700 | -0.44245600 | -1.51978900 |
| C | -5.77800500 | -0.16100700 | -2.52864100 |
| C | -4.50523400 | 0.37156500  | -2.22534900 |
| C | 1.30248200  | 2.67432900  | 3.93804600  |
| C | 0.39542000  | 3.19666000  | 2.80055500  |
| C | -0.61687900 | 4.24742600  | 3.33702200  |
| C | -3.26099900 | -0.53826900 | -4.26643400 |
| C | -3.53055900 | 0.69237700  | -3.36578200 |
| C | -4.05846100 | 1.88646600  | -4.20818000 |
| H | 1.11078300  | -3.57355400 | 2.03523000  |
| H | 3.36732800  | -2.94695700 | 1.57934400  |
| H | -1.47810600 | 4.20807500  | -0.55942400 |
| H | -3.42744800 | 2.99473400  | -1.17979100 |
| H | -3.15695600 | -3.43642700 | 3.88233000  |
| H | -4.43449700 | -4.66162800 | 2.14382800  |
| H | -3.58229400 | -4.75902700 | -0.18567600 |
| H | 0.02320300  | -1.54232400 | 3.27827000  |
| H | 3.68100200  | -0.06178400 | 1.72839100  |

|   |             |             |             |
|---|-------------|-------------|-------------|
| H | -2.62586000 | -1.39896300 | 4.80040400  |
| H | -2.01861600 | -0.24433300 | 3.58018800  |
| H | -1.15582200 | -0.45031900 | 5.11402300  |
| H | -1.17812300 | -3.59647400 | 5.25400200  |
| H | 0.22749600  | -2.55241400 | 5.54319600  |
| H | 0.31181300  | -3.85134700 | 4.33260200  |
| H | 6.13196600  | 1.75494700  | 1.40327500  |
| H | 4.62408800  | 2.11540600  | 2.27314400  |
| H | 4.59581100  | 1.90966500  | 0.51646100  |
| H | 5.16572600  | -1.53593100 | 3.14536500  |
| H | 5.00355900  | 0.10110000  | 3.81419500  |
| H | 6.48928200  | -0.36935100 | 2.96300900  |
| H | 7.31408100  | -0.11762900 | 0.65556700  |
| H | 8.15134000  | -1.34474000 | -1.33044600 |
| H | 6.60012900  | -2.68496700 | -2.72656500 |
| H | -0.67541900 | -2.83981000 | -1.46113600 |
| H | 2.96923900  | -3.25797300 | -1.85646400 |
| H | -2.83729100 | -4.87856600 | -2.23032000 |
| H | -1.85718300 | -3.85286400 | -3.29042400 |
| H | -3.08160200 | -3.11548600 | -2.23845400 |
| H | -0.79998900 | -5.88117100 | -0.99834000 |
| H | 0.54600800  | -4.82915500 | -0.51602500 |
| H | 0.17147800  | -5.05097100 | -2.23713800 |
| H | 3.00557100  | -1.27105600 | -3.31593300 |
| H | 2.79171400  | -2.74633900 | -4.27969000 |
| H | 4.37748500  | -1.93959300 | -4.24301900 |
| H | 5.33463100  | -4.31465700 | -3.51808300 |
| H | 3.70328200  | -4.98678900 | -3.41658900 |
| H | 4.77308500  | -5.03998100 | -1.99693300 |
| H | 2.97987900  | 5.67167200  | -1.29590300 |
| H | 3.71165600  | 6.03643900  | 1.04508100  |
| H | 2.53581200  | 4.87958600  | 2.90558800  |
| H | 0.27165500  | 3.33888600  | -2.38260800 |
| H | -3.76315800 | 0.79986200  | 1.77569900  |
| H | 3.00090400  | 4.48348700  | -3.16407600 |
| H | 1.85124500  | 3.64917900  | -4.22833300 |
| H | 2.58479200  | 2.76838300  | -2.87767400 |
| H | -0.50706600 | 5.75786000  | -2.16254300 |
| H | 0.02488900  | 5.36119600  | -3.81378500 |
| H | 1.07810600  | 6.29779000  | -2.73537300 |
| H | -6.36966600 | -0.56977900 | 2.64638900  |
| H | -4.96680400 | -0.18103100 | 3.65311500  |
| H | -4.81541600 | -1.39339400 | 2.36623400  |
| H | -5.19068600 | 2.84841000  | 1.38340700  |
| H | -5.27316000 | 2.30089600  | 3.07096400  |
| H | -6.61426700 | 1.95701000  | 1.95644800  |
| H | -7.13258300 | -0.40717800 | 0.59610600  |
| H | -7.68160300 | -0.85432600 | -1.78116400 |
| H | -6.03389200 | -0.35991000 | -3.56534800 |
| H | -0.16002600 | 2.32718200  | 2.44006700  |
| H | -2.55908500 | 0.97454800  | -2.95240500 |
| H | 1.88715900  | 3.47413700  | 4.41446700  |



|   |             |             |             |
|---|-------------|-------------|-------------|
| H | 1.98159400  | 1.91036600  | 3.54643600  |
| H | 0.68339200  | 2.20851700  | 4.71648800  |
| H | -1.21975800 | 3.81410700  | 4.14666600  |
| H | -1.30195200 | 4.59037800  | 2.54850400  |
| H | -0.09825800 | 5.13119900  | 3.73423700  |
| H | -2.79175100 | -1.33830000 | -3.68785800 |
| H | -2.56403400 | -0.25928300 | -5.06645600 |
| H | -4.17832700 | -0.92077400 | -4.73389300 |
| H | -4.22523100 | 2.78222600  | -3.59355700 |
| H | -5.00969700 | 1.64030300  | -4.69838800 |
| H | -3.33161900 | 2.14204800  | -4.98936400 |
| O | 1.52587700  | 0.39428900  | 1.45671200  |
| O | 0.08246600  | 0.26123800  | 1.94562700  |
| O | -0.41729400 | 0.69540800  | -2.20230500 |
| O | -0.47768300 | -0.81923300 | -2.00005900 |

**Peroxo  $\eta^3$ -Ozone Complex (higher energy conformation with one octahedral-like coordination)**

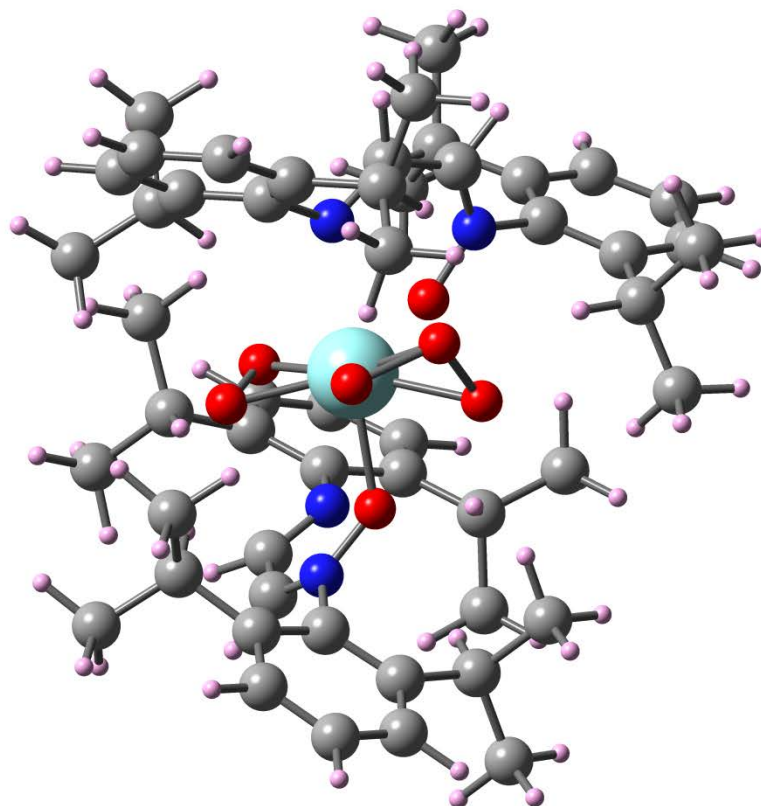

Fig. S69: NCCNO Peroxo  $\eta^3$ -Ozone Complex (higher energy conformation with one octahedral-like coordination)

| SCF           | E <sub>ZP</sub> | H            | G            |
|---------------|-----------------|--------------|--------------|
| -2816.5490885 | -2815.392746    | -2815.319483 | -2815.506813 |

|    |             |             |             |
|----|-------------|-------------|-------------|
| Zr | 0.91591300  | 0.25208000  | -0.20969200 |
| O  | -1.15060700 | 1.11001300  | -0.52329400 |
| O  | 0.70700400  | -1.91956300 | -0.62415800 |
| O  | 2.82888800  | 0.54831100  | -1.05134300 |
| N  | -1.50772100 | -2.53961600 | 1.18920400  |
| N  | 1.22797300  | -2.99686300 | 0.00467500  |
| N  | 1.16878900  | 2.71081100  | 0.17721300  |
| N  | -1.58139400 | 2.25692300  | -1.05192700 |
| C  | -0.55277900 | -3.22621600 | 1.73927900  |
| C  | 0.68972800  | -3.56660100 | 1.06370400  |
| C  | 0.38648800  | 3.60715700  | -0.37110700 |
| C  | -0.89241000 | 3.38864500  | -1.01147100 |
| C  | -2.74407700 | -2.27595800 | 1.82667000  |
| C  | -2.86660300 | -1.84390200 | 3.18763800  |
| C  | -4.16871700 | -1.67196100 | 3.70284200  |

|   |             |             |             |
|---|-------------|-------------|-------------|
| C | -5.30992900 | -1.89366800 | 2.91744700  |
| C | -5.17102100 | -2.24758500 | 1.56396700  |
| C | -3.89965900 | -2.42281200 | 0.99034900  |
| C | -1.79772700 | -0.03274300 | 4.62312100  |
| C | -1.66785600 | -1.47715800 | 4.07433500  |
| C | -1.49028100 | -2.48596100 | 5.24007400  |
| C | 4.89711000  | -1.46548000 | 1.00245000  |
| C | 3.92540900  | -2.64700100 | 1.26716900  |
| C | 4.45333900  | -3.55799000 | 2.40560100  |
| C | 2.42151600  | -3.57467400 | -0.64307200 |
| C | 3.68604300  | -3.44028600 | -0.02171600 |
| C | 4.78044000  | -4.04637200 | -0.67782700 |
| C | 4.61719100  | -4.71855100 | -1.89682300 |
| C | 3.35141300  | -4.79413500 | -2.50088200 |
| C | 2.21876400  | -4.22082300 | -1.88967200 |
| C | -4.79100800 | -2.20268500 | -1.41116500 |
| C | -3.73930700 | -2.83916200 | -0.47349200 |
| C | -3.76168500 | -4.38791700 | -0.60444200 |
| C | 0.83457400  | -3.25491100 | -3.76717300 |
| C | 0.85768300  | -4.27102200 | -2.59144100 |
| C | 0.49453600  | -5.69807700 | -3.07303600 |
| C | 2.41233200  | 3.22173900  | 0.75901800  |
| C | 3.40592300  | 3.81021400  | -0.07846800 |
| C | 4.57879000  | 4.28910300  | 0.54356100  |
| C | 4.76321500  | 4.20277000  | 1.92941800  |
| C | 3.76407100  | 3.63049600  | 2.73085100  |
| C | 2.57383000  | 3.12689900  | 2.17040000  |
| C | 4.48017200  | 3.19507900  | -2.30661100 |
| C | 3.30429800  | 3.92521200  | -1.60639400 |
| C | 3.23448800  | 5.41092400  | -2.05278300 |
| C | -4.69425100 | 1.95627700  | 1.58104400  |
| C | -3.86038600 | 2.90542200  | 0.68217300  |
| C | -4.23223700 | 4.38885400  | 0.94747200  |
| C | -2.93235400 | 2.21922500  | -1.63959200 |
| C | -4.02206500 | 2.55224400  | -0.79999800 |
| C | -5.30233700 | 2.53757700  | -1.39185900 |
| C | -5.46954200 | 2.19281200  | -2.74289800 |
| C | -4.36276200 | 1.84075000  | -3.53132400 |
| C | -3.05726000 | 1.83463100  | -2.99506100 |
| C | 1.97790100  | 1.70787800  | 4.22015300  |
| C | 1.45670900  | 2.61839200  | 3.08483500  |
| C | 0.65705800  | 3.82242700  | 3.65788200  |
| C | -2.05866200 | 0.03689100  | -4.49393300 |
| C | -1.86004800 | 1.43829100  | -3.86236900 |
| C | -1.59159500 | 2.50529500  | -4.95684000 |
| H | -0.64715200 | -3.68836300 | 2.72909500  |
| H | 1.24951100  | -4.41136100 | 1.45254500  |
| H | 0.68724300  | 4.65724100  | -0.35857400 |
| H | -1.37657600 | 4.23982800  | -1.47338900 |
| H | -4.28973600 | -1.34993200 | 4.73412300  |
| H | -6.30021000 | -1.77046700 | 3.35017000  |
| H | -6.05849700 | -2.38170100 | 0.95232600  |

|   |             |             |             |
|---|-------------|-------------|-------------|
| H | -0.75989700 | -1.47007500 | 3.46443200  |
| H | 2.98715500  | -2.19341200 | 1.60019000  |
| H | -2.68013400 | 0.09266300  | 5.26466200  |
| H | -1.85621900 | 0.68306300  | 3.79544900  |
| H | -0.91027500 | 0.21566300  | 5.21913900  |
| H | -2.36253200 | -2.47822200 | 5.90789700  |
| H | -0.60603500 | -2.22596600 | 5.83703600  |
| H | -1.36657000 | -3.51590300 | 4.87797700  |
| H | 5.89853800  | -1.81851200 | 0.71921300  |
| H | 4.99323900  | -0.85661800 | 1.91019200  |
| H | 4.51886000  | -0.81853400 | 0.20259600  |
| H | 3.75546600  | -4.37705900 | 2.63033500  |
| H | 4.59086200  | -2.96875900 | 3.32131600  |
| H | 5.42138800  | -4.00817900 | 2.14756900  |
| H | 5.76976800  | -3.96929300 | -0.23556100 |
| H | 5.47743200  | -5.17024100 | -2.38529800 |
| H | 3.24249100  | -5.29979700 | -3.45605700 |
| H | -2.74611300 | -2.50001600 | -0.79029200 |
| H | 0.08091200  | -3.95306500 | -1.88722300 |
| H | -5.80462100 | -2.57721800 | -1.21250100 |
| H | -4.55282800 | -2.44802100 | -2.45482400 |
| H | -4.80415800 | -1.10968100 | -1.31502300 |
| H | -4.73006900 | -4.79481100 | -0.28189600 |
| H | -2.97854600 | -4.85014300 | 0.00941500  |
| H | -3.59676900 | -4.68721000 | -1.64853800 |
| H | 1.02247400  | -2.23703800 | -3.40810200 |
| H | -0.14782200 | -3.27468000 | -4.25944800 |
| H | 1.59540400  | -3.50868800 | -4.51845800 |
| H | 1.17692200  | -6.05129600 | -3.85677700 |
| H | -0.51853100 | -5.70014100 | -3.49638600 |
| H | 0.52197000  | -6.42339300 | -2.24893400 |
| H | 5.35992200  | 4.72570400  | -0.07318300 |
| H | 5.67693200  | 4.58047100  | 2.38240800  |
| H | 3.90603900  | 3.57859700  | 3.80618600  |
| H | 2.39647600  | 3.42326200  | -1.95093000 |
| H | -2.81197500 | 2.76660900  | 0.97080300  |
| H | 5.44786100  | 3.65298700  | -2.06120300 |
| H | 4.35184300  | 3.24229500  | -3.39631300 |
| H | 4.49679300  | 2.14240000  | -2.00929500 |
| H | 2.38155200  | 5.93820100  | -1.60137000 |
| H | 3.13661900  | 5.47389200  | -3.14480700 |
| H | 4.14364100  | 5.95558200  | -1.76626100 |
| H | -5.77061800 | 2.06823900  | 1.39578100  |
| H | -4.51146700 | 2.18634500  | 2.63845900  |
| H | -4.42513500 | 0.90807600  | 1.41150000  |
| H | -3.61698900 | 5.07497500  | 0.35015200  |
| H | -4.08387300 | 4.63305700  | 2.00716200  |
| H | -5.28402700 | 4.58344200  | 0.70106700  |
| H | -6.17126900 | 2.78864500  | -0.78993800 |
| H | -6.46566100 | 2.18939100  | -3.17880800 |
| H | -4.51067400 | 1.56005900  | -4.57028500 |
| H | 0.76966400  | 2.00210900  | 2.49821900  |

|   |             |             |             |
|---|-------------|-------------|-------------|
| H | -0.96139900 | 1.35563400  | -3.24319300 |
| H | 2.65371100  | 2.23421400  | 4.90823600  |
| H | 2.49340500  | 0.84186400  | 3.79277600  |
| H | 1.12944400  | 1.33648300  | 4.80879200  |
| H | -0.17597700 | 3.46290300  | 4.27708100  |
| H | 0.24037400  | 4.45008000  | 2.85704800  |
| H | 1.29559000  | 4.46174100  | 4.28332000  |
| H | -2.25745400 | -0.71446000 | -3.72048400 |
| H | -1.14124500 | -0.25788000 | -5.01631100 |
| H | -2.88675900 | 0.02322700  | -5.21610600 |
| H | -1.40292200 | 3.49548300  | -4.51983600 |
| H | -2.44301400 | 2.59848300  | -5.64465000 |
| H | -0.70890500 | 2.22157400  | -5.54309800 |
| O | 1.73524500  | -0.35096200 | 1.57787600  |
| O | 0.22600300  | -0.00961600 | 1.71886500  |
| O | 1.86119100  | 1.17907100  | -2.09689600 |
| O | 0.85531600  | 0.10579300  | -2.43202500 |

## Planar Bisperoxo Complex with Adsorbed Propylene Oxide

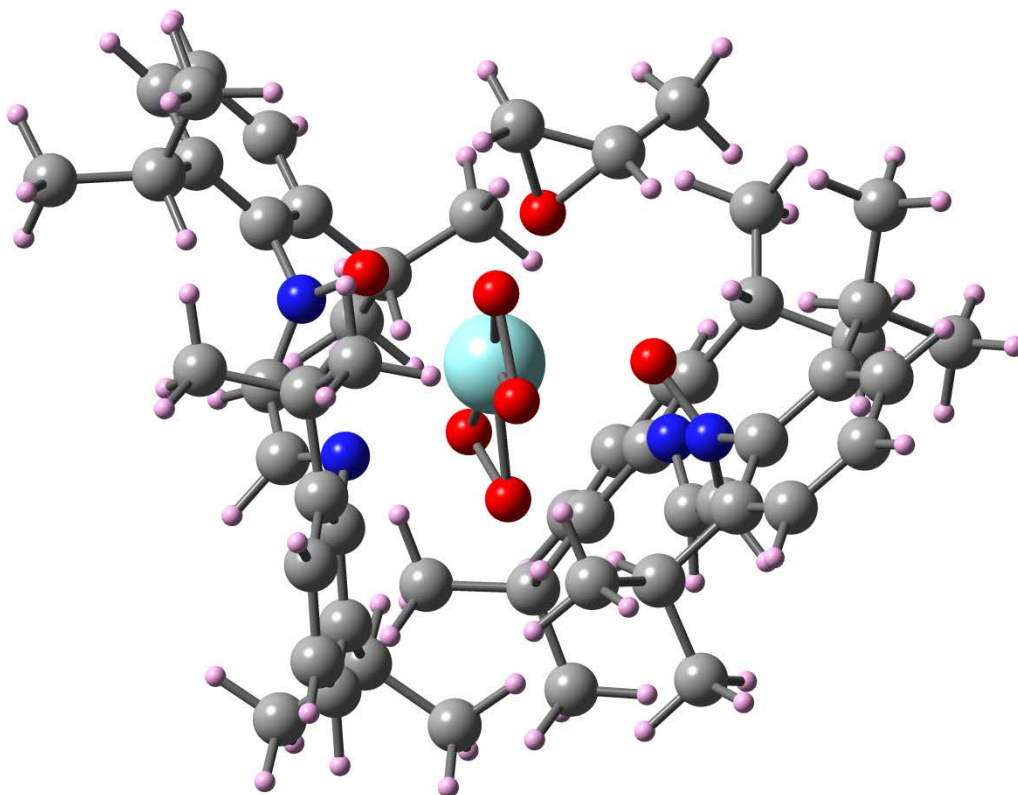

Fig. S70: NCCNO Planar Bisperoxo Complex with Adsorbed Propylene Oxide

| SCF           | E <sub>ZP</sub> | H            | G            |
|---------------|-----------------|--------------|--------------|
| -2934.4941137 | -2933.252394    | -2933.175107 | -2933.367590 |

|    |             |             |             |
|----|-------------|-------------|-------------|
| Zr | -0.33545000 | 0.61000200  | -0.64962400 |
| O  | -2.34393400 | -0.40260400 | -1.15210500 |
| O  | 1.88264100  | 0.34344300  | -1.08765800 |
| O  | -0.66678100 | 1.87217900  | -2.26519000 |
| N  | 2.58386500  | -1.79051100 | 0.95606800  |
| N  | 2.87320600  | 0.96226100  | -0.38920500 |
| N  | -2.15586700 | 1.54715000  | 0.84094100  |
| N  | -3.08770900 | -1.08046100 | -0.24613300 |
| C  | 3.01528400  | -0.69324800 | 1.49929100  |
| C  | 3.33017900  | 0.52420900  | 0.76675900  |
| C  | -2.94079300 | 0.69555300  | 1.44933700  |
| C  | -3.28390200 | -0.62856300 | 0.98123400  |
| C  | 2.41102600  | -2.99621200 | 1.68479200  |
| C  | 1.80733000  | -3.07780600 | 2.98205000  |
| C  | 1.72706600  | -4.35081700 | 3.58703100  |
| C  | 2.20575300  | -5.50583100 | 2.95152400  |
| C  | 2.75489100  | -5.41693500 | 1.66046500  |
| C  | 2.85384800  | -4.17846600 | 1.00312900  |

|   |             |             |             |
|---|-------------|-------------|-------------|
| C | -0.26762200 | -2.13080900 | 4.13426000  |
| C | 1.20527200  | -1.87577500 | 3.72526400  |
| C | 2.05724300  | -1.50997000 | 4.97143200  |
| C | 1.42165200  | 4.86610100  | 0.49545700  |
| C | 2.43115500  | 3.71827300  | 0.74370300  |
| C | 3.34004200  | 4.04967600  | 1.96088900  |
| C | 3.49720800  | 2.13695600  | -1.03280700 |
| C | 3.28425400  | 3.43014300  | -0.49646500 |
| C | 3.93957600  | 4.50140000  | -1.14339400 |
| C | 4.75225100  | 4.29233200  | -2.26512000 |
| C | 4.94145300  | 2.99507400  | -2.76724900 |
| C | 4.31869400  | 1.88583400  | -2.16230000 |
| C | 3.25860000  | -5.30458500 | -1.27912900 |
| C | 3.48705100  | -4.06372400 | -0.38606500 |
| C | 5.00724100  | -3.76122300 | -0.26581100 |
| C | 4.47842700  | 0.37466000  | -4.22069500 |
| C | 4.60713200  | 0.47150700  | -2.68016600 |
| C | 6.01826100  | 0.00758800  | -2.22368800 |
| C | -2.12096200 | 2.90372000  | 1.36060000  |
| C | -2.55271600 | 3.94180700  | 0.48545100  |
| C | -2.57154300 | 5.25963600  | 0.98109600  |
| C | -2.16898200 | 5.55065700  | 2.29390100  |
| C | -1.73909200 | 4.51537400  | 3.13493800  |
| C | -1.70487400 | 3.17269200  | 2.69778100  |
| C | -2.62021800 | 4.65082000  | -1.97977700 |
| C | -3.09463000 | 3.63873000  | -0.91329000 |
| C | -4.64639600 | 3.55659600  | -0.87068300 |
| C | -0.69205900 | -4.20684500 | -0.72058600 |
| C | -1.79780700 | -3.70605500 | 0.24575400  |
| C | -1.93735600 | -4.65263500 | 1.46576400  |
| C | -3.73508800 | -2.29784700 | -0.74567600 |
| C | -3.12484700 | -3.54984100 | -0.50101600 |
| C | -3.78429300 | -4.68856400 | -1.01496900 |
| C | -4.97633800 | -4.57056600 | -1.74481800 |
| C | -5.54004500 | -3.30639000 | -1.98541000 |
| C | -4.92939800 | -2.13566900 | -1.49219700 |
| C | 0.22590500  | 2.41726100  | 4.18085000  |
| C | -1.20478300 | 2.10030000  | 3.67709600  |
| C | -2.17647100 | 1.93519800  | 4.87641900  |
| C | -5.33413500 | -0.41939700 | -3.30784000 |
| C | -5.52883900 | -0.76099700 | -1.80602800 |
| C | -7.02168300 | -0.66727600 | -1.40145500 |
| H | 3.30897100  | -0.63071700 | 2.55326900  |
| H | 4.08175500  | 1.16654400  | 1.21606200  |
| H | -3.47082500 | 0.98889300  | 2.35915100  |
| H | -3.88171000 | -1.26140000 | 1.62655600  |
| H | 1.27782300  | -4.43795400 | 4.57314500  |
| H | 2.14025700  | -6.46938500 | 3.45185200  |
| H | 3.10142600  | -6.31885800 | 1.16455100  |
| H | 1.16960500  | -1.01551900 | 3.05299600  |
| H | 1.83911100  | 2.82942400  | 0.98494700  |
| H | -0.37571100 | -2.98730400 | 4.81318500  |

|   |             |             |             |
|---|-------------|-------------|-------------|
| H | -0.87518300 | -2.30058300 | 3.24003900  |
| H | -0.66510000 | -1.24448500 | 4.64775100  |
| H | 2.06338200  | -2.32996300 | 5.70232800  |
| H | 1.64539400  | -0.61983300 | 5.46576000  |
| H | 3.10321700  | -1.29997400 | 4.70827300  |
| H | 1.92682900  | 5.82654900  | 0.32328700  |
| H | 0.77292200  | 4.98318300  | 1.37208000  |
| H | 0.78830900  | 4.62363300  | -0.36222900 |
| H | 4.04417900  | 3.23831000  | 2.19388800  |
| H | 2.72421900  | 4.22819800  | 2.85133800  |
| H | 3.93163700  | 4.95544100  | 1.77172000  |
| H | 3.79662900  | 5.51000500  | -0.76767900 |
| H | 5.23909000  | 5.13692600  | -2.74693000 |
| H | 5.58187400  | 2.84376600  | -3.63162600 |
| H | 3.02093200  | -3.19627400 | -0.86937700 |
| H | 3.87192500  | -0.21487800 | -2.24903300 |
| H | 3.79935200  | -6.18612000 | -0.90908400 |
| H | 3.62556000  | -5.10383800 | -2.29483100 |
| H | 2.19383900  | -5.56043500 | -1.34726300 |
| H | 5.53083500  | -4.58611700 | 0.23670700  |
| H | 5.18396500  | -2.84502200 | 0.31028800  |
| H | 5.45466200  | -3.63029300 | -1.26115100 |
| H | 3.49992100  | 0.73474100  | -4.56078000 |
| H | 4.59618900  | -0.66821200 | -4.54331100 |
| H | 5.24969800  | 0.96440800  | -4.73211600 |
| H | 6.80004600  | 0.65580700  | -2.64119300 |
| H | 6.21060500  | -1.01972500 | -2.56071200 |
| H | 6.11276400  | 0.02791500  | -1.13033600 |
| H | -2.90504400 | 6.06485500  | 0.33295800  |
| H | -2.19082700 | 6.57554100  | 2.65765900  |
| H | -1.42285100 | 4.74892900  | 4.14872800  |
| H | -2.70864600 | 2.66707700  | -1.22970500 |
| H | -1.46519500 | -2.73187000 | 0.61953600  |
| H | -2.99119600 | 5.66849100  | -1.79228900 |
| H | -2.98478500 | 4.34135100  | -2.96812400 |
| H | -1.52678700 | 4.66075700  | -2.01703600 |
| H | -4.99138100 | 2.80582300  | -0.14527400 |
| H | -5.03907300 | 3.28276000  | -1.85984500 |
| H | -5.08647200 | 4.52243300  | -0.58545800 |
| H | -0.94884100 | -5.18489600 | -1.15141800 |
| H | 0.25179200  | -4.30681800 | -0.17373900 |
| H | -0.53599700 | -3.48858500 | -1.53339400 |
| H | -2.70572000 | -4.29854200 | 2.16644500  |
| H | -0.98352600 | -4.70639000 | 2.00339200  |
| H | -2.20728800 | -5.67212700 | 1.15914300  |
| H | -3.35384300 | -5.67162000 | -0.84547400 |
| H | -5.46405500 | -5.46216700 | -2.13184500 |
| H | -6.45867500 | -3.22873000 | -2.56059200 |
| H | -1.12188800 | 1.14687600  | 3.14936900  |
| H | -4.98531100 | 0.00276400  | -1.23912900 |
| H | 0.27294300  | 3.37083600  | 4.72374700  |
| H | 0.91898000  | 2.45509600  | 3.33455800  |



|   |             |             |             |
|---|-------------|-------------|-------------|
| H | 0.56730200  | 1.62609500  | 4.86272300  |
| H | -1.82715400 | 1.13591600  | 5.54458900  |
| H | -3.19469600 | 1.68299900  | 4.54868300  |
| H | -2.24424400 | 2.85935400  | 5.46596600  |
| H | -4.26970200 | -0.42600500 | -3.56794300 |
| H | -5.73330300 | 0.58004700  | -3.52389900 |
| H | -5.85485200 | -1.14130000 | -3.95109300 |
| H | -7.16496600 | -0.89627300 | -0.33749000 |
| H | -7.64430000 | -1.36060400 | -1.98129500 |
| H | -7.39625700 | 0.34773000  | -1.58596100 |
| O | 0.32663300  | 0.64173800  | 1.35120400  |
| O | -0.33721900 | -0.69933800 | 1.05091600  |
| O | -0.06816900 | 2.60951000  | -1.02560200 |
| O | -0.05802300 | -0.96787900 | -2.39977500 |
| C | -0.73076000 | -0.73744300 | -3.73574500 |
| H | -1.26623800 | -1.61503200 | -4.08855700 |
| H | -1.24136400 | 0.21890500  | -3.79452400 |
| C | 0.75907000  | -0.75698000 | -3.66044800 |
| H | 1.25485100  | 0.20973300  | -3.64081900 |
| C | 1.57540600  | -1.95179400 | -4.08632600 |
| H | 1.92025400  | -1.82215000 | -5.12107600 |
| H | 2.45383300  | -2.05984100 | -3.44052400 |
| H | 0.98465700  | -2.87280800 | -4.02626100 |

## Catalyst Deformation Product with Oxygen Added to Ligand

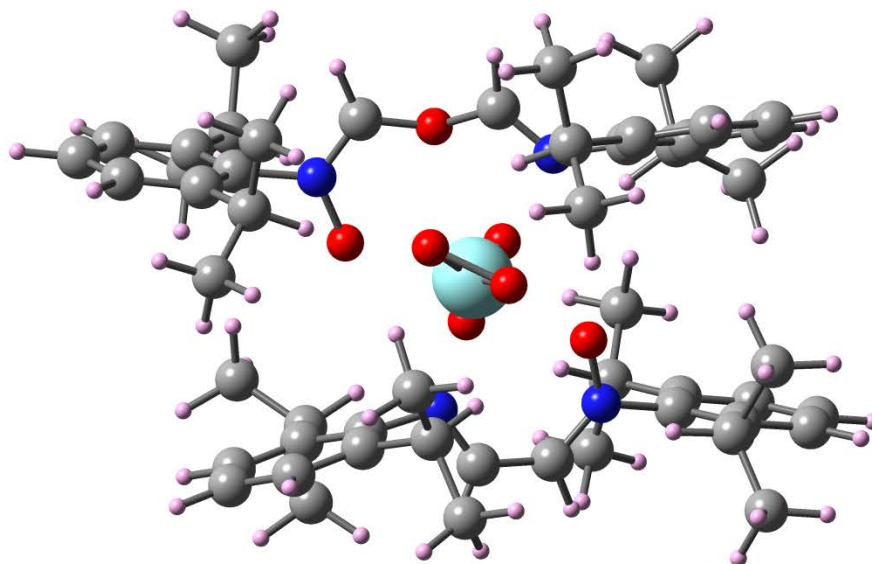

Fig. S71: NCCNO Catalyst Deformation Product with Oxygen Added to Ligand

| SCF           | E <sub>ZP</sub> | H            | G            |
|---------------|-----------------|--------------|--------------|
| -2816.5979503 | -2815.440310    | -2815.367332 | -2815.552206 |

|    |             |             |             |
|----|-------------|-------------|-------------|
| Zr | -0.01827800 | -0.01882000 | -0.23852600 |
| O  | 2.17223900  | -0.55365500 | 0.28389400  |
| O  | -2.27668200 | -0.20837300 | -0.94822100 |
| O  | 0.23269300  | -1.72744100 | -1.42993200 |
| O  | 0.61056500  | -0.43582400 | -2.17360100 |
| N  | 0.91309400  | 2.42105300  | -0.87569600 |
| N  | -3.02832100 | 0.90939500  | -1.16133800 |
| N  | -0.26554700 | -1.90935300 | 1.23140700  |
| N  | 2.66045500  | -1.79396900 | 0.32101800  |
| C  | -0.18520200 | 2.96219500  | -1.20670200 |
| C  | -2.48196900 | 2.05462200  | -1.48947100 |
| C  | 0.65342600  | -2.82878400 | 1.35274000  |
| C  | 1.99294300  | -2.83146300 | 0.79627700  |
| C  | 2.08184500  | 3.16077200  | -0.47356600 |
| C  | 2.05364800  | 4.04160900  | 0.64254400  |
| C  | 3.24566000  | 4.73466500  | 0.94918300  |
| C  | 4.41385200  | 4.55265600  | 0.19631600  |
| C  | 4.42029100  | 3.65356700  | -0.88395700 |
| C  | 3.26165900  | 2.93674000  | -1.23904000 |
| C  | 1.13717600  | 3.97770200  | 3.01897600  |
| C  | 0.81844100  | 4.25166600  | 1.52774000  |
| C  | 0.23573400  | 5.67896800  | 1.34179700  |
| C  | -4.92915800 | 0.95555300  | 2.62406400  |
| C  | -4.41736400 | 1.62413900  | 1.32510100  |
| C  | -4.54342600 | 3.16915000  | 1.43281300  |
| C  | -4.48675700 | 0.77110800  | -1.11395200 |

|   |             |             |             |
|---|-------------|-------------|-------------|
| C | -5.15643100 | 1.11149100  | 0.08462600  |
| C | -6.56329500 | 0.99113000  | 0.07524600  |
| C | -7.24474700 | 0.53960000  | -1.06587700 |
| C | -6.53863200 | 0.19147400  | -2.22990500 |
| C | -5.13374300 | 0.29372500  | -2.28043900 |
| C | 4.60328000  | 1.33987900  | -2.74158900 |
| C | 3.23702900  | 2.00002300  | -2.45048000 |
| C | 2.73741600  | 2.76099800  | -3.71142500 |
| C | -4.83218200 | -1.38456700 | -4.19237500 |
| C | -4.35919800 | -0.05375600 | -3.55726100 |
| C | -4.46318200 | 1.10561000  | -4.58671400 |
| C | -1.52078100 | -2.18564100 | 1.94262200  |
| C | -2.48782300 | -3.01547900 | 1.31421600  |
| C | -3.65080500 | -3.32563900 | 2.05130700  |
| C | -3.84180800 | -2.83414800 | 3.35178300  |
| C | -2.87266900 | -2.00540100 | 3.93778500  |
| C | -1.69419600 | -1.65370800 | 3.24664100  |
| C | -3.54373500 | -3.44795500 | -0.97637000 |
| C | -2.28528700 | -3.60145000 | -0.08907500 |
| C | -1.86810700 | -5.09599700 | -0.00711400 |
| C | 5.20718900  | 0.68803400  | 2.00999900  |
| C | 4.82129900  | -0.81429000 | 2.04653500  |
| C | 5.56239100  | -1.55402200 | 3.19038100  |
| C | 4.04689300  | -1.94818100 | -0.15227700 |
| C | 5.08225000  | -1.47242000 | 0.68789600  |
| C | 6.40135000  | -1.62242400 | 0.21306200  |
| C | 6.65703300  | -2.21450900 | -1.03478800 |
| C | 5.59896400  | -2.66245400 | -1.84053800 |
| C | 4.25558100  | -2.53304600 | -1.42504900 |
| C | -1.24197100 | 0.52490600  | 4.50390800  |
| C | -0.63606600 | -0.77588800 | 3.92327000  |
| C | 0.11928800  | -1.57906200 | 5.01647700  |
| C | 3.19609400  | -2.41114200 | -3.74524900 |
| C | 3.11364800  | -3.02217000 | -2.32423900 |
| C | 3.10774400  | -4.57353900 | -2.39580400 |
| H | -0.47320100 | 4.01162100  | -1.23721000 |
| H | -3.07927300 | 2.94416600  | -1.63926300 |
| H | 0.42846600  | -3.72630100 | 1.93477000  |
| H | 2.53981000  | -3.76570500 | 0.81848000  |
| H | 3.25711300  | 5.41657200  | 1.79567000  |
| H | 5.31788000  | 5.10035900  | 0.45318000  |
| H | 5.33404200  | 3.50801500  | -1.45172800 |
| H | 0.05539400  | 3.51537900  | 1.26056000  |
| H | -3.35095200 | 1.38283500  | 1.24142500  |
| H | 1.90403500  | 4.65774100  | 3.41450500  |
| H | 1.47372800  | 2.94288100  | 3.13582200  |
| H | 0.22850500  | 4.10705200  | 3.62247000  |
| H | 0.95603300  | 6.44776300  | 1.65299300  |
| H | -0.67089300 | 5.80167800  | 1.94961500  |
| H | -0.02461300 | 5.88435700  | 0.29285500  |
| H | -5.96589700 | 1.23812100  | 2.85347500  |
| H | -4.30360700 | 1.27135000  | 3.46771000  |

|   |             |             |             |
|---|-------------|-------------|-------------|
| H | -4.87159700 | -0.13601000 | 2.55649500  |
| H | -4.14152500 | 3.67602700  | 0.54492100  |
| H | -3.98275900 | 3.52871400  | 2.30439900  |
| H | -5.59252000 | 3.47500300  | 1.54646400  |
| H | -7.12487700 | 1.24365500  | 0.96964900  |
| H | -8.32881700 | 0.45447600  | -1.04773900 |
| H | -7.08115300 | -0.16630000 | -3.10016700 |
| H | 2.51539000  | 1.19898200  | -2.24559300 |
| H | -3.30249800 | -0.18597700 | -3.29915900 |
| H | 5.35508200  | 2.07181700  | -3.06828600 |
| H | 4.49293300  | 0.60539100  | -3.54896000 |
| H | 4.99198100  | 0.81532200  | -1.86027000 |
| H | 3.42863700  | 3.57287200  | -3.97820500 |
| H | 1.74380300  | 3.19804800  | -3.55190900 |
| H | 2.66524400  | 2.07332700  | -4.56400800 |
| H | -4.78457100 | -2.20612400 | -3.46924000 |
| H | -4.18373200 | -1.64005100 | -5.04000700 |
| H | -5.86052400 | -1.31672900 | -4.57143500 |
| H | -5.50561400 | 1.26915600  | -4.89140000 |
| H | -3.87705100 | 0.86954100  | -5.48399800 |
| H | -4.08168300 | 2.04903800  | -4.17410400 |
| H | -4.41085600 | -3.95921400 | 1.60212700  |
| H | -4.74119700 | -3.09532700 | 3.90504800  |
| H | -3.03040400 | -1.62577200 | 4.94397300  |
| H | -1.48462900 | -3.05052900 | -0.59450700 |
| H | 3.74866500  | -0.85537500 | 2.26503900  |
| H | -4.39148200 | -4.03899000 | -0.60325800 |
| H | -3.31703300 | -3.79515600 | -1.99327700 |
| H | -3.84057800 | -2.39632200 | -1.03112200 |
| H | -0.94012000 | -5.23256600 | 0.56438900  |
| H | -1.70458100 | -5.49787500 | -1.01568600 |
| H | -2.64851500 | -5.69764700 | 0.47901800  |
| H | 6.27878700  | 0.81895900  | 1.80690500  |
| H | 4.98524500  | 1.15764200  | 2.97695500  |
| H | 4.64107400  | 1.21898100  | 1.23768900  |
| H | 5.28195100  | -2.61476300 | 3.23324000  |
| H | 5.31346200  | -1.09537000 | 4.15605100  |
| H | 6.65186200  | -1.49941400 | 3.06783300  |
| H | 7.23018700  | -1.27434400 | 0.82341100  |
| H | 7.68226400  | -2.32124200 | -1.38138500 |
| H | 5.81244800  | -3.10690500 | -2.80850400 |
| H | 0.08075400  | -0.44538700 | 3.16554600  |
| H | 2.15085600  | -2.69186800 | -1.91874200 |
| H | -2.00394800 | 0.32665800  | 5.27066100  |
| H | -1.68086400 | 1.11705800  | 3.69434400  |
| H | -0.44853100 | 1.12668200  | 4.96643600  |
| H | 0.90085400  | -0.95654200 | 5.47237500  |
| H | 0.59908800  | -2.47712900 | 4.60164700  |
| H | -0.56122400 | -1.90668300 | 5.81473600  |
| H | 3.11918700  | -1.32050600 | -3.69678700 |
| H | 2.34868600  | -2.76999000 | -4.34197500 |
| H | 4.12324700  | -2.68511100 | -4.26815900 |

|   |             |             |             |
|---|-------------|-------------|-------------|
| H | 3.01648300  | -5.03051300 | -1.40027900 |
| H | 4.02900100  | -4.95859500 | -2.85455900 |
| H | 2.25816900  | -4.91391200 | -3.00103200 |
| O | -1.07874100 | 1.29347100  | 1.04152200  |
| O | 0.37203400  | 1.09488400  | 1.49729000  |
| O | -1.14176300 | 2.03354600  | -1.68819200 |

## 5.7 Structures with eight oxygen atoms

## Bisozone Complex

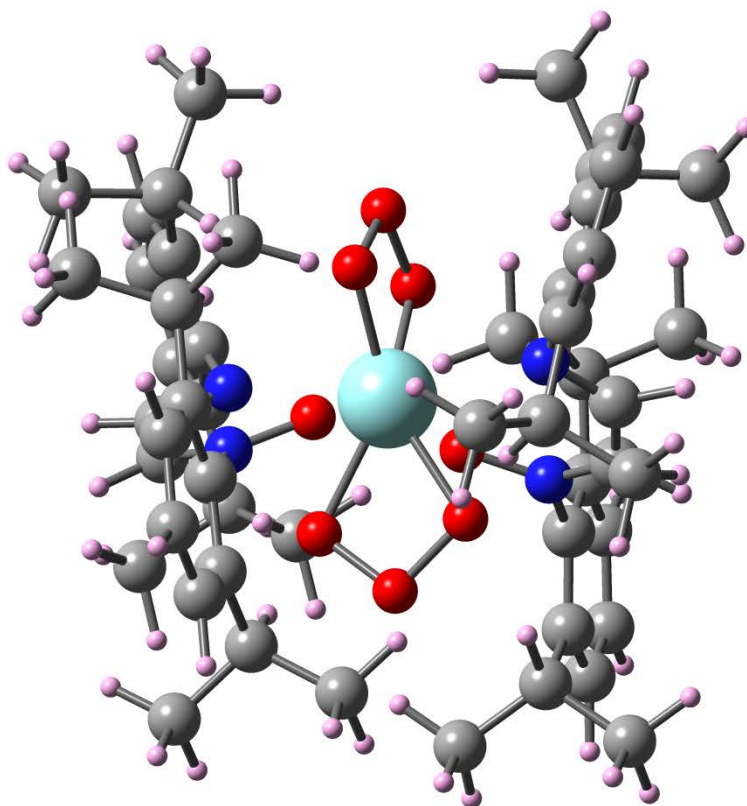

Fig. S72: NCCNO Bisozone Complex

|    | SCF           | E <sub>ZP</sub> | H            | G            |
|----|---------------|-----------------|--------------|--------------|
|    | -2891.7057419 | -2890.544318    | -2890.470627 | -2890.658358 |
| Zr | -0.01563900   | 0.04372200      | -0.17441500  |              |
| O  | 2.19697400    | 0.00263500      | 0.35283200   |              |
| O  | -2.23589800   | -0.10171900     | 0.31052700   |              |
| O  | 0.06027500    | 0.91534100      | 1.84224400   |              |
| N  | -0.43136500   | -2.25568900     | -0.86109700  |              |
| N  | -2.95707400   | -1.18180600     | 0.61066100   |              |
| N  | 0.43799700    | 2.44017100      | -0.17661100  |              |
| N  | 2.92825800    | 0.94240000      | 0.95184800   |              |
| C  | -1.46004800   | -2.91908900     | -0.40694600  |              |
| C  | -2.59163900   | -2.43131000     | 0.35894400   |              |
| C  | 1.47942400    | 2.92691500      | 0.44224800   |              |
| C  | 2.58871900    | 2.21986900      | 1.05442500   |              |
| C  | 0.47274500    | -3.00016800     | -1.74931000  |              |
| C  | 0.17319700    | -3.04595400     | -3.13864800  |              |
| C  | 1.05151100    | -3.77126600     | -3.97011400  |              |
| C  | 2.17589800    | -4.42836700     | -3.44878100  |              |
| C  | 2.43648700    | -4.37917900     | -2.07221000  |              |

|   |             |             |             |
|---|-------------|-------------|-------------|
| C | 1.59605800  | -3.66659900 | -1.19033500 |
| C | -0.80815900 | -1.70253300 | -5.09379800 |
| C | -1.08007500 | -2.39256100 | -3.73558000 |
| C | -2.21519500 | -3.44399800 | -3.89350000 |
| C | -5.66809100 | 0.84916700  | -1.72386700 |
| C | -5.18005100 | -0.51137400 | -1.16379800 |
| C | -5.92346400 | -1.68901000 | -1.84990200 |
| C | -4.26523400 | -0.90455300 | 1.22820000  |
| C | -5.33654500 | -0.58479800 | 0.35937400  |
| C | -6.58941100 | -0.34902200 | 0.96214900  |
| C | -6.74514000 | -0.41665200 | 2.35661400  |
| C | -5.64937100 | -0.71187300 | 3.18228000  |
| C | -4.37026500 | -0.95719800 | 2.63699200  |
| C | 3.35674800  | -3.42689000 | 0.65796600  |
| C | 1.87332600  | -3.70549900 | 0.31714800  |
| C | 1.42937700  | -5.07236900 | 0.90925900  |
| C | -2.92257600 | -0.06917300 | 4.52515000  |
| C | -3.18059500 | -1.25139400 | 3.55598700  |
| C | -3.39229900 | -2.57425100 | 4.33846900  |
| C | -0.41983100 | 3.41866600  | -0.85710200 |
| C | -1.59902700 | 3.86956400  | -0.20497400 |
| C | -2.39237800 | 4.82321100  | -0.87605300 |
| C | -2.03394100 | 5.30864900  | -2.14215400 |
| C | -0.86124400 | 4.85023400  | -2.75933800 |
| C | -0.02694900 | 3.89726400  | -2.13780700 |
| C | -3.47915500 | 3.14028400  | 1.38334600  |
| C | -1.96945800 | 3.43080200  | 1.21575300  |
| C | -1.50704600 | 4.50234700  | 2.24266100  |
| C | 5.51991600  | -0.53167900 | -1.81557100 |
| C | 5.14607000  | 0.68731600  | -0.93295500 |
| C | 5.99595700  | 1.92865500  | -1.31488500 |
| C | 4.22194900  | 0.47609500  | 1.47914700  |
| C | 5.29101900  | 0.36202200  | 0.55807400  |
| C | 6.52975900  | -0.06568900 | 1.07859900  |
| C | 6.67435200  | -0.37079400 | 2.44219800  |
| C | 5.58028000  | -0.26748800 | 3.31535800  |
| C | 4.31433500  | 0.15258500  | 2.85239600  |
| C | 1.05324600  | 3.15817300  | -4.34366500 |
| C | 1.26294700  | 3.44639400  | -2.83699100 |
| C | 2.38619000  | 4.50506400  | -2.65093400 |
| C | 2.82372500  | -1.15974600 | 4.43536600  |
| C | 3.12320100  | 0.22814100  | 3.81263600  |
| C | 3.36025400  | 1.29201300  | 4.91646700  |
| H | -1.54476500 | -3.98310600 | -0.64293100 |
| H | -3.30007600 | -3.17828900 | 0.69665900  |
| H | 1.59785800  | 4.01218200  | 0.49807200  |
| H | 3.30754200  | 2.82830600  | 1.59029700  |
| H | 0.85294900  | -3.81748800 | -5.03690500 |
| H | 2.84023500  | -4.97977100 | -4.11035000 |
| H | 3.30038500  | -4.90330800 | -1.67218300 |
| H | -1.42163900 | -1.60771400 | -3.05398000 |
| H | -4.11815400 | -0.58538700 | -1.42140500 |

|   |             |             |             |
|---|-------------|-------------|-------------|
| H | -0.56122100 | -2.42360800 | -5.88554200 |
| H | 0.00802100  | -0.98080300 | -4.99663500 |
| H | -1.70478200 | -1.15520200 | -5.41362300 |
| H | -1.91197400 | -4.24877000 | -4.57716900 |
| H | -3.11662200 | -2.96989200 | -4.30529700 |
| H | -2.48461100 | -3.90891700 | -2.93510400 |
| H | -6.74269100 | 0.99891900  | -1.55447200 |
| H | -5.48818400 | 0.89091700  | -2.80529400 |
| H | -5.12569300 | 1.68171700  | -1.26205200 |
| H | -5.55688200 | -2.66060400 | -1.49284200 |
| H | -5.77400400 | -1.64775300 | -2.93641400 |
| H | -7.00310000 | -1.64541000 | -1.65431900 |
| H | -7.44464300 | -0.10737500 | 0.33709300  |
| H | -7.72076400 | -0.23183500 | 2.79990100  |
| H | -5.78242800 | -0.74598900 | 4.26015800  |
| H | 1.28348400  | -2.92795500 | 0.81112000  |
| H | -2.27116100 | -1.35819500 | 2.95775800  |
| H | 4.02878200  | -4.19952100 | 0.26055300  |
| H | 3.48886200  | -3.40466900 | 1.74802200  |
| H | 3.66839500  | -2.45483900 | 0.26165200  |
| H | 1.99906700  | -5.90125500 | 0.46675700  |
| H | 0.36350400  | -5.26450900 | 0.72552900  |
| H | 1.59123500  | -5.08644900 | 1.99529100  |
| H | -2.71693100 | 0.85131100  | 3.96752100  |
| H | -2.04234600 | -0.28582000 | 5.14219400  |
| H | -3.77698900 | 0.10717700  | 5.19296200  |
| H | -4.26806300 | -2.51783400 | 4.99891400  |
| H | -2.51300400 | -2.78409700 | 4.96032800  |
| H | -3.53798000 | -3.42634700 | 3.66081500  |
| H | -3.29661600 | 5.19004300  | -0.39858500 |
| H | -2.66206800 | 6.04197900  | -2.64290200 |
| H | -0.59113100 | 5.23007300  | -3.74056600 |
| H | -1.43542000 | 2.50659700  | 1.45488100  |
| H | 4.09766600  | 0.91484500  | -1.15312100 |
| H | -4.09424700 | 4.04256700  | 1.26314100  |
| H | -3.67062400 | 2.74366100  | 2.38924500  |
| H | -3.81312600 | 2.39074200  | 0.65789700  |
| H | -0.42506800 | 4.67948700  | 2.17925800  |
| H | -1.73289500 | 4.17102200  | 3.26485000  |
| H | -2.01550700 | 5.46120200  | 2.07035300  |
| H | 6.57091700  | -0.82192100 | -1.68375500 |
| H | 5.36610200  | -0.28539800 | -2.87351900 |
| H | 4.88908400  | -1.39549300 | -1.57881800 |
| H | 5.71536100  | 2.80896100  | -0.72141300 |
| H | 5.85000400  | 2.17242000  | -2.37498200 |
| H | 7.06659400  | 1.74421400  | -1.15560000 |
| H | 7.38220700  | -0.16413200 | 0.41209700  |
| H | 7.63931300  | -0.69768400 | 2.82233300  |
| H | 5.70392100  | -0.52345900 | 4.36403400  |
| H | 1.58821500  | 2.50217300  | -2.38983700 |
| H | 2.22369600  | 0.51237000  | 3.25871800  |
| H | 0.81924000  | 4.06779100  | -4.91368800 |



|   |             |             |             |
|---|-------------|-------------|-------------|
| H | 0.24811300  | 2.43057000  | -4.48025100 |
| H | 1.97176000  | 2.73035200  | -4.76735300 |
| H | 3.31108300  | 4.16776800  | -3.13853200 |
| H | 2.60954500  | 4.68993200  | -1.59119200 |
| H | 2.09753100  | 5.46562800  | -3.09926800 |
| H | 2.59327100  | -1.89238800 | 3.65407100  |
| H | 1.94691700  | -1.08707900 | 5.09011300  |
| H | 3.66804700  | -1.53286500 | 5.03121900  |
| H | 3.54067000  | 2.28714200  | 4.48799200  |
| H | 4.22370600  | 1.03643900  | 5.54521200  |
| H | 2.47784400  | 1.35834500  | 5.56513200  |
| O | -1.16700300 | 0.45131700  | -1.91413600 |
| O | 1.15381200  | 0.18629900  | -1.94833500 |
| O | -0.02208000 | -0.36357600 | 2.61140800  |
| O | -0.10720900 | -1.37176800 | 1.51205300  |
| O | -0.00160400 | 0.49074000  | -2.88248300 |

## 6. NCCNO Triplet Ground States

### 6.1 Structures with two oxygen atoms

#### Bare Complex

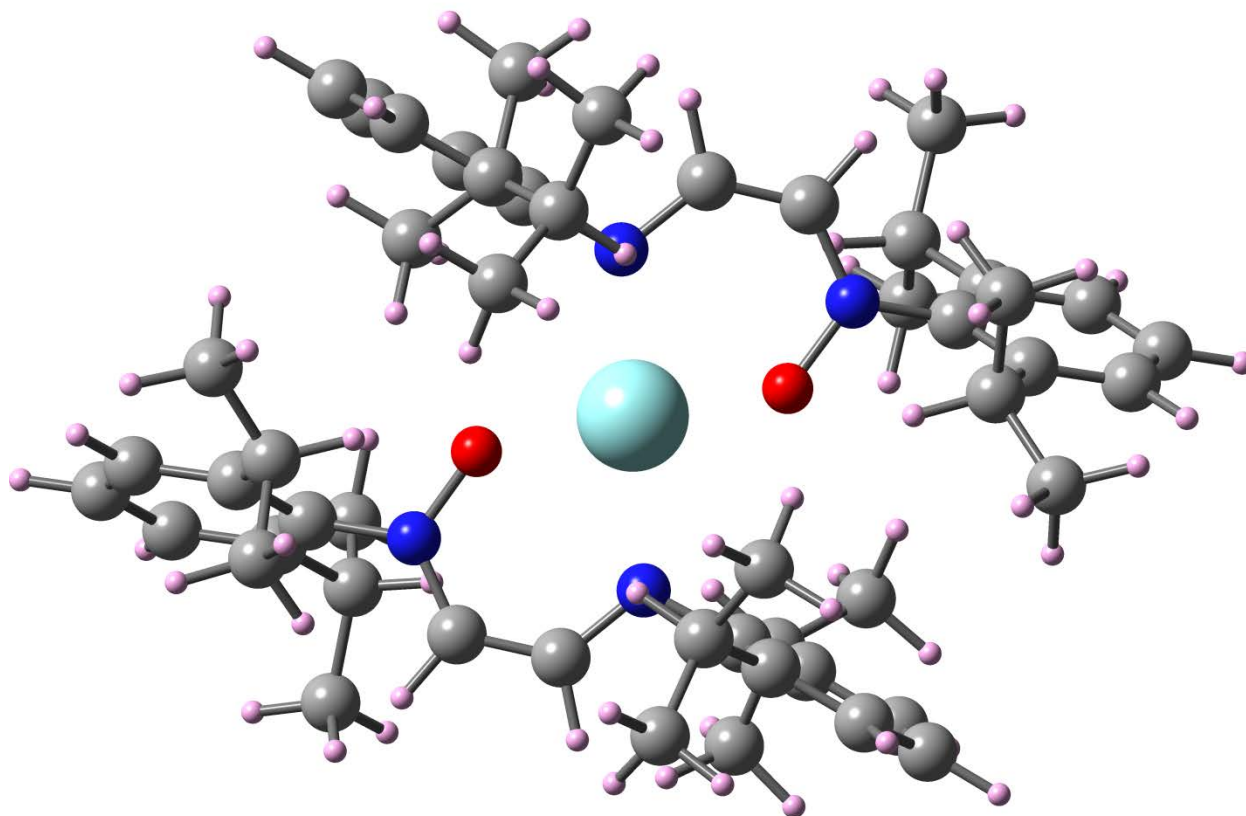

Fig. S73: NCCNO Bare Complex

| SCF          | $E_{ZP}$     | H            | G            |
|--------------|--------------|--------------|--------------|
| -2440.617606 | -2439.477753 | -2439.410641 | -2439.585321 |

|    |             |             |             |
|----|-------------|-------------|-------------|
| Zr | 0.00272452  | 0.05046653  | 0.15103464  |
| O  | 2.00247379  | 0.39996794  | 0.01781330  |
| O  | -2.01306779 | -0.41269896 | -0.03187695 |
| N  | 0.14431423  | -2.20441646 | 0.25553395  |
| N  | -2.81980686 | -1.53229314 | -0.21303215 |
| N  | -0.14305096 | 2.19377960  | 0.34066687  |
| N  | 2.83956714  | 1.52124792  | -0.11022828 |
| C  | -0.92500833 | -3.07166136 | 0.18685650  |
| C  | -2.26555845 | -2.77416179 | -0.04090259 |
| C  | 0.95777818  | 3.07297429  | 0.32584932  |
| C  | 2.28210708  | 2.76997607  | 0.10557005  |
| C  | 1.41394582  | -2.88353449 | 0.50690480  |

|   |             |             |             |
|---|-------------|-------------|-------------|
| C | 2.24166038  | -3.24825412 | -0.59209729 |
| C | 3.43528604  | -3.95235617 | -0.32879328 |
| C | 3.80855164  | -4.28776702 | 0.98173246  |
| C | 2.98835303  | -3.91157845 | 2.05551148  |
| C | 1.78497622  | -3.20619232 | 1.84317552  |
| C | 3.01306373  | -2.30962344 | -2.84440663 |
| C | 1.84951847  | -2.93761245 | -2.03970577 |
| C | 1.31213775  | -4.20921929 | -2.75082526 |
| C | -3.62487472 | -1.31709435 | -4.28632403 |
| C | -3.60415666 | -2.16129666 | -2.98611335 |
| C | -3.89515393 | -3.65264888 | -3.30646636 |
| C | -4.19326803 | -1.30650455 | -0.60805930 |
| C | -4.58382281 | -1.62298353 | -1.93658514 |
| C | -5.93985820 | -1.43414357 | -2.28229307 |
| C | -6.85778567 | -0.92471990 | -1.35333995 |
| C | -6.44080622 | -0.59800562 | -0.05128057 |
| C | -5.10440155 | -0.78611794 | 0.35187878  |
| C | 1.69787303  | -1.92813494 | 4.04780942  |
| C | 0.92011967  | -2.82481213 | 3.05013551  |
| C | 0.35567123  | -4.08130866 | 3.76401991  |
| C | -5.41184381 | 0.67290044  | 2.44787537  |
| C | -4.66521122 | -0.51233042 | 1.79392563  |
| C | -4.83183264 | -1.79792450 | 2.65312492  |
| C | -1.40391391 | 2.87957424  | 0.60640407  |
| C | -1.80228045 | 3.12857955  | 1.95278278  |
| C | -3.00983411 | 3.82055224  | 2.18397108  |
| C | -3.81002034 | 4.26205424  | 1.11931455  |
| C | -3.40373997 | 4.01806820  | -0.20111220 |
| C | -2.20166090 | 3.33441880  | -0.48239291 |
| C | -1.73466867 | 1.75560931  | 4.10533704  |
| C | -0.95128540 | 2.69328344  | 3.15126953  |
| C | -0.39546176 | 3.91991845  | 3.92211917  |
| C | 3.55150372  | 1.53601236  | -4.19387105 |
| C | 3.59144815  | 2.31086106  | -2.85147202 |
| C | 3.92577705  | 3.80647044  | -3.09990739 |
| C | 4.19149267  | 1.28871675  | -0.54603913 |
| C | 4.57470883  | 1.68245924  | -1.85727832 |
| C | 5.91970231  | 1.48371101  | -2.24038559 |
| C | 6.83781611  | 0.88366408  | -1.36762044 |
| C | 6.43229922  | 0.47996505  | -0.08283629 |
| C | 5.11029065  | 0.68218187  | 0.35762771  |
| C | -2.84867706 | 2.33128730  | -2.73317681 |
| C | -1.78276101 | 3.12817307  | -1.94053570 |
| C | -1.47217349 | 4.48074008  | -2.63425227 |
| C | 5.46770218  | -0.85074521 | 2.39644973  |
| C | 4.68478377  | 0.33462891  | 1.78779898  |
| C | 4.81315646  | 1.58860679  | 2.69888520  |
| H | -0.71175808 | -4.13320074 | 0.31786150  |
| H | -2.97499613 | -3.59088050 | -0.10052492 |
| H | 0.74015911  | 4.12455668  | 0.50726426  |
| H | 3.00620063  | 3.57682449  | 0.10315780  |
| H | 4.07815306  | -4.24178301 | -1.15653295 |

|   |             |             |             |
|---|-------------|-------------|-------------|
| H | 4.72982820  | -4.83655495 | 1.16364704  |
| H | 3.28427953  | -4.16847789 | 3.07030721  |
| H | 1.03368242  | -2.20520015 | -2.01726818 |
| H | -2.58951826 | -2.10084409 | -2.57734315 |
| H | 3.83776665  | -3.01932901 | -2.99223046 |
| H | 3.41201051  | -1.42739675 | -2.33085099 |
| H | 2.66078990  | -2.00561348 | -3.83980115 |
| H | 2.08144452  | -4.99242624 | -2.78767378 |
| H | 1.01416387  | -3.97660992 | -3.78252198 |
| H | 0.43942979  | -4.61896898 | -2.22658686 |
| H | -4.59451561 | -1.38077850 | -4.79682193 |
| H | -2.85918768 | -1.68359946 | -4.98304149 |
| H | -3.42051716 | -0.26138754 | -4.07690696 |
| H | -3.83649589 | -4.27783399 | -2.40662785 |
| H | -3.16828334 | -4.03586220 | -4.03471997 |
| H | -4.89903408 | -3.77482312 | -3.73412262 |
| H | -6.27399092 | -1.67402500 | -3.28849672 |
| H | -7.89621490 | -0.77822537 | -1.64166630 |
| H | -7.16304008 | -0.19921521 | 0.65429670  |
| H | 0.06650133  | -2.24162185 | 2.68808133  |
| H | -3.60089076 | -0.25573809 | 1.77486468  |
| H | 2.56401736  | -2.45335263 | 4.47153508  |
| H | 1.04684406  | -1.62877449 | 4.88039656  |
| H | 2.06200838  | -1.01900640 | 3.55283809  |
| H | 1.16283049  | -4.70925273 | 4.16409743  |
| H | -0.23647126 | -4.69682217 | 3.07472216  |
| H | -0.29112879 | -3.78897169 | 4.60237159  |
| H | -5.32951627 | 1.58008103  | 1.83837311  |
| H | -4.97222911 | 0.88700998  | 3.43035821  |
| H | -6.47581399 | 0.45189564  | 2.60780924  |
| H | -5.88604489 | -2.10365348 | 2.69791758  |
| H | -4.48585943 | -1.61653294 | 3.67952171  |
| H | -4.25110411 | -2.63329324 | 2.24347195  |
| H | -3.32472755 | 4.01776794  | 3.20658237  |
| H | -4.73675783 | 4.79643291  | 1.31670267  |
| H | -4.02391955 | 4.36791965  | -1.02372548 |
| H | -0.09318096 | 2.12993515  | 2.76945217  |
| H | 2.58648663  | 2.26317576  | -2.41862510 |
| H | -2.60504487 | 2.26119734  | 4.54459143  |
| H | -1.08922599 | 1.42329039  | 4.92991603  |
| H | -2.09414313 | 0.86628779  | 3.57184551  |
| H | 0.20131489  | 4.56253572  | 3.26278557  |
| H | 0.24592945  | 3.59355012  | 4.75216237  |
| H | -1.20704971 | 4.52944076  | 4.34170983  |
| H | 4.51246835  | 1.58798140  | -4.72218821 |
| H | 2.78633997  | 1.96686285  | -4.85364879 |
| H | 3.31089769  | 0.47901764  | -4.03291351 |
| H | 3.91032369  | 4.38090385  | -2.16534802 |
| H | 3.19404716  | 4.25346989  | -3.78601360 |
| H | 4.92229596  | 3.91967318  | -3.54723107 |
| H | 6.24362319  | 1.78498862  | -3.23362953 |
| H | 7.86663812  | 0.72783891  | -1.68471307 |

|   |             |             |             |
|---|-------------|-------------|-------------|
| H | 7.15461071  | 0.01435556  | 0.58049605  |
| H | -0.85947807 | 2.53847819  | -1.94331898 |
| H | 3.62741828  | 0.05088047  | 1.75753963  |
| H | -3.79722266 | 2.88077581  | -2.80022220 |
| H | -3.05025364 | 1.36903401  | -2.24815485 |
| H | -2.49918906 | 2.14285973  | -3.75808009 |
| H | -1.12992987 | 4.31283893  | -3.66484777 |
| H | -0.68691237 | 5.02856138  | -2.09799546 |
| H | -2.36227278 | 5.12306077  | -2.67630423 |
| H | 5.41849864  | -1.73546812 | 1.75105223  |
| H | 5.03252177  | -1.11822091 | 3.36799877  |
| H | 6.52341380  | -0.60104091 | 2.57004419  |
| H | 4.20169708  | 2.41798492  | 2.32529182  |
| H | 5.85732089  | 1.92643770  | 2.75205893  |
| H | 4.47858476  | 1.35390926  | 3.71857542  |

## 6.2 Structures with three oxygen atoms

### Oxo Complex

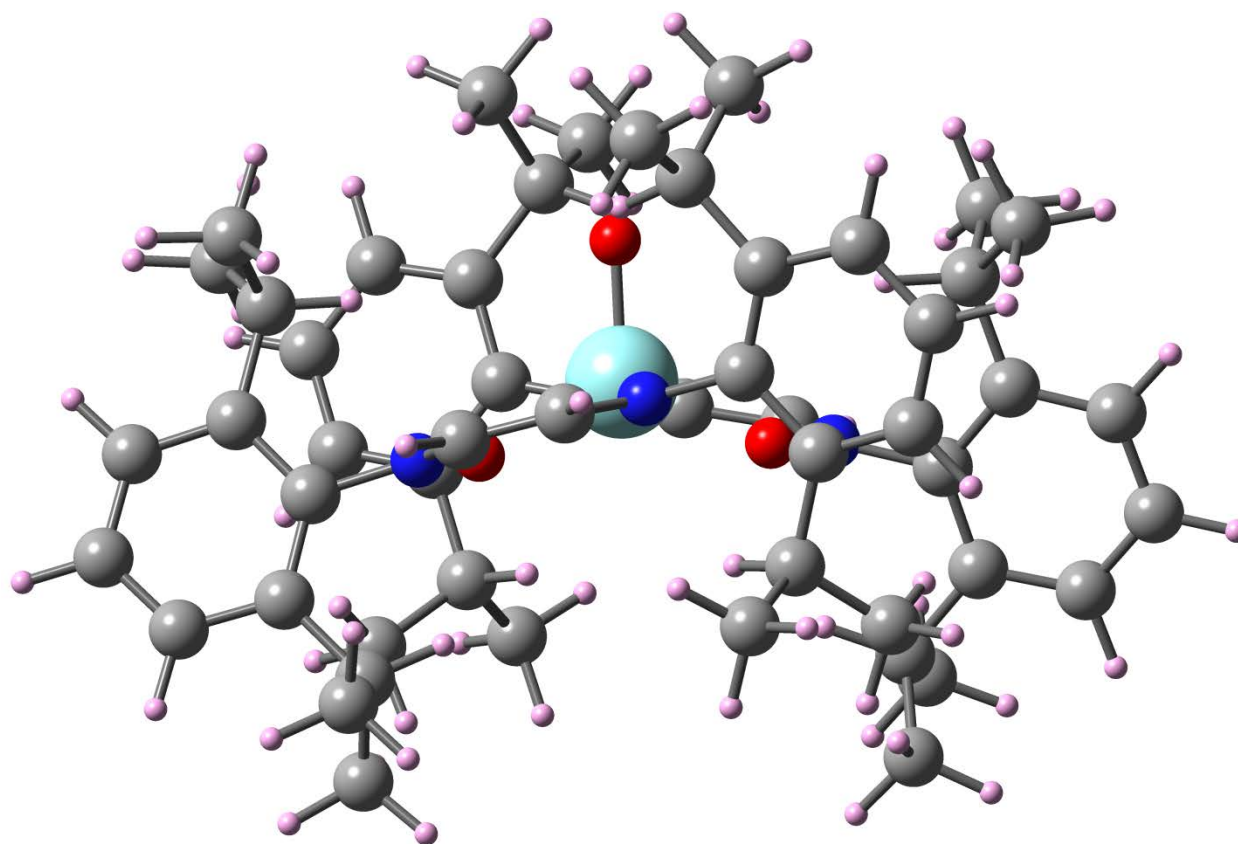

Fig. S74: NCCNO Oxo Complex

| SCF          | E <sub>ZP</sub> | H            | G            |
|--------------|-----------------|--------------|--------------|
| -2515.928361 | -2514.784299    | -2514.715938 | -2514.893339 |

|    |             |             |             |
|----|-------------|-------------|-------------|
| Zr | -0.01113530 | -0.00481867 | -0.52226708 |
| N  | -0.21389481 | -2.30651007 | -0.29573169 |
| N  | 0.21949895  | 2.29650343  | -0.29665256 |
| C  | 0.84464869  | -3.14435662 | -0.15048824 |
| C  | 2.17983278  | -2.81906625 | 0.12695306  |
| C  | -0.83143247 | 3.14434714  | -0.15368474 |
| C  | -2.16912576 | 2.83296558  | 0.12810163  |
| C  | -1.48053876 | -2.97169555 | -0.58574608 |
| C  | -2.38248750 | -3.22403769 | 0.48719132  |
| C  | -3.58386826 | -3.90594638 | 0.20604831  |
| C  | -3.88779393 | -4.33131811 | -1.09735176 |
| C  | -2.99125156 | -4.06872890 | -2.14264719 |
| C  | -1.77660786 | -3.38470593 | -1.91595345 |
| C  | -3.23924280 | -2.29122194 | 2.72303758  |

|   |             |             |             |
|---|-------------|-------------|-------------|
| C | -2.03175739 | -2.83808139 | 1.92749648  |
| C | -1.39556108 | -4.04450301 | 2.67241160  |
| C | 3.54916492  | -1.38984254 | 4.42880352  |
| C | 3.51792374  | -2.21502356 | 3.11730997  |
| C | 3.81806917  | -3.71002769 | 3.41218426  |
| C | 4.07921434  | -1.35397746 | 0.73914448  |
| C | 4.48430669  | -1.66187835 | 2.06373372  |
| C | 5.84266400  | -1.46098160 | 2.39138162  |
| C | 6.74600745  | -0.95569215 | 1.44446960  |
| C | 6.31294445  | -0.64476424 | 0.14422199  |
| C | 4.97037260  | -0.83817975 | -0.23872324 |
| C | -1.51682052 | -2.38488770 | -4.25222553 |
| C | -0.82298907 | -3.14370310 | -3.09303041 |
| C | -0.21492935 | -4.48148824 | -3.59459459 |
| C | 5.15968810  | 0.68381681  | -2.29980864 |
| C | 4.51058196  | -0.57325986 | -1.67598812 |
| C | 4.78211549  | -1.82307560 | -2.56005824 |
| C | 1.49164393  | 2.95085352  | -0.58732417 |
| C | 1.79222038  | 3.35766537  | -1.91828675 |
| C | 3.01163554  | 4.03308494  | -2.14558616 |
| C | 3.90812714  | 4.29403370  | -1.09991093 |
| C | 3.59955729  | 3.87483517  | 0.20444274  |
| C | 2.39375625  | 3.20104821  | 0.48596524  |
| C | 1.52909231  | 2.34817296  | -4.24921702 |
| C | 0.83887439  | 3.11958110  | -3.09618699 |
| C | 0.24509429  | 4.46026868  | -3.60693827 |
| C | -3.56342709 | 1.36036845  | 4.44224628  |
| C | -3.50502255 | 2.19139653  | 3.13566433  |
| C | -3.76494785 | 3.69244913  | 3.43870537  |
| C | -4.08259188 | 1.38741649  | 0.74290182  |
| C | -4.48230935 | 1.67312275  | 2.07462790  |
| C | -5.84330695 | 1.48849853  | 2.39846761  |
| C | -6.75641970 | 1.02164366  | 1.44024122  |
| C | -6.32933127 | 0.73342125  | 0.13361070  |
| C | -4.98245866 | 0.90982276  | -0.24480970 |
| C | 3.24498030  | 2.27652218  | 2.72725364  |
| C | 2.03930841  | 2.82020742  | 1.92672942  |
| C | 1.40149739  | 4.02877301  | 2.66687259  |
| C | -5.07174087 | -0.68175943 | -2.24985683 |
| C | -4.53581852 | 0.65644467  | -1.68755405 |
| C | -4.95916488 | 1.84467495  | -2.59506153 |
| H | 0.66002174  | -4.21253928 | -0.27429785 |
| H | 2.90419322  | -3.62278706 | 0.17812367  |
| H | -0.63733153 | 4.21031431  | -0.28227569 |
| H | -2.88592797 | 3.64359590  | 0.17673369  |
| H | -4.28454004 | -4.11142561 | 1.01078483  |
| H | -4.81594377 | -4.86306163 | -1.29470399 |
| H | -3.23331728 | -4.39881645 | -3.14998792 |
| H | -1.27992472 | -2.04100659 | 1.88535901  |
| H | 2.49875268  | -2.15151082 | 2.72026820  |
| H | -4.00815267 | -3.05836995 | 2.88428122  |
| H | -3.70161092 | -1.44405252 | 2.20445473  |

|   |             |             |             |
|---|-------------|-------------|-------------|
| H | -2.90775467 | -1.95304958 | 3.71430817  |
| H | -2.10457048 | -4.88146337 | 2.73151787  |
| H | -1.11639990 | -3.76101076 | 3.69669995  |
| H | -0.49424939 | -4.40139063 | 2.15916298  |
| H | 4.52464410  | -1.45551460 | 4.92793840  |
| H | 2.79333871  | -1.76999977 | 5.12885009  |
| H | 3.33788626  | -0.33258984 | 4.23531318  |
| H | 3.75057831  | -4.32176634 | 2.50378016  |
| H | 3.10147439  | -4.10686206 | 4.14333456  |
| H | 4.82765130  | -3.83472968 | 3.82532379  |
| H | 6.19184684  | -1.69198520 | 3.39452184  |
| H | 7.78738594  | -0.80247692 | 1.71838733  |
| H | 7.02447486  | -0.25189848 | -0.57586901 |
| H | -0.00724555 | -2.49917218 | -2.75672491 |
| H | 3.42892156  | -0.40438836 | -1.66299694 |
| H | -2.37358982 | -2.94147446 | -4.65648185 |
| H | -0.80261007 | -2.22182668 | -5.07009921 |
| H | -1.85457402 | -1.40116923 | -3.90980591 |
| H | -0.99363798 | -5.15885025 | -3.97121450 |
| H | 0.32353763  | -5.00526413 | -2.79324759 |
| H | 0.49245078  | -4.29279600 | -4.41336654 |
| H | 4.99901597  | 1.56814713  | -1.67337153 |
| H | 4.70882413  | 0.88153747  | -3.28048802 |
| H | 6.23959535  | 0.55528993  | -2.45457588 |
| H | 5.85785774  | -2.03995538 | -2.61216856 |
| H | 4.41735713  | -1.64962357 | -3.58064403 |
| H | 4.27316682  | -2.71173415 | -2.16640991 |
| H | 3.25687592  | 4.35855335  | -3.15369211 |
| H | 4.83936532  | 4.82032838  | -1.29750271 |
| H | 4.30023123  | 4.07854817  | 1.00960979  |
| H | 0.01587736  | 2.48472831  | -2.75887563 |
| H | -2.48678932 | 2.10195548  | 2.74087386  |
| H | 2.39022734  | 2.89637326  | -4.65580626 |
| H | 0.81507522  | 2.18404218  | -5.06699938 |
| H | 1.86001317  | 1.36457870  | -3.89968906 |
| H | -0.28850941 | 4.99480678  | -2.80944162 |
| H | -0.46354256 | 4.27353625  | -4.42508264 |
| H | 1.03095171  | 5.12719782  | -3.98739140 |
| H | -4.53670822 | 1.45373076  | 4.94136106  |
| H | -2.79693966 | 1.71316070  | 5.14499808  |
| H | -3.38467475 | 0.29814830  | 4.24343553  |
| H | -3.67405203 | 4.30784116  | 2.53492157  |
| H | -3.04213577 | 4.06426091  | 4.17686811  |
| H | -4.77344564 | 3.84230937  | 3.84623684  |
| H | -6.18847800 | 1.70324937  | 3.40655019  |
| H | -7.80042879 | 0.88197261  | 1.71131318  |
| H | -7.04776559 | 0.37193123  | -0.59675048 |
| H | 1.28797869  | 2.02271489  | 1.88476041  |
| H | -3.44288782 | 0.59828433  | -1.70584801 |
| H | 4.01042692  | 3.04629489  | 2.89275210  |
| H | 3.71292427  | 1.43158840  | 2.21014863  |
| H | 2.91035139  | 1.93644697  | 3.71685121  |



|   |             |             |             |
|---|-------------|-------------|-------------|
| H | 1.12185554  | 3.74846799  | 3.69193192  |
| H | 0.50022301  | 4.38334784  | 2.15206067  |
| H | 2.11003073  | 4.86631227  | 2.72372452  |
| H | -4.78053105 | -1.52549960 | -1.61477019 |
| H | -4.65625341 | -0.85538181 | -3.25062539 |
| H | -6.16627711 | -0.67790843 | -2.34239009 |
| H | -4.53395883 | 2.79192312  | -2.23918844 |
| H | -6.05218115 | 1.95137669  | -2.62056135 |
| H | -4.60757652 | 1.67975349  | -3.62168043 |
| O | -0.01683960 | -0.00164910 | -2.33778286 |
| O | -1.88340021 | 0.47127424  | 0.34675702  |
| O | 1.87190914  | -0.45950069 | 0.33957132  |
| N | -2.69939646 | 1.60057366  | 0.36626975  |
| N | 2.69906857  | -1.58070101 | 0.35821315  |

### 6.3 Structures with four oxygen atoms

#### Dioxo Complex

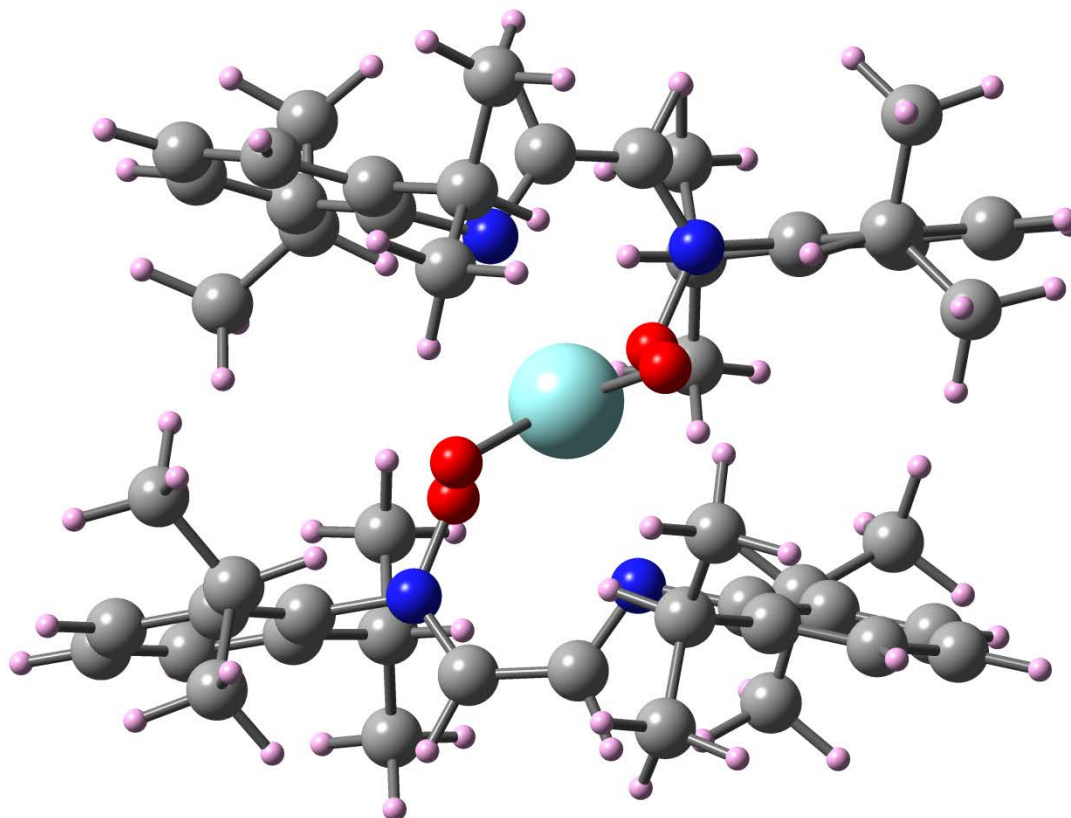

Fig. S75: NCCNO Dioxo Complex

| SCF          | E <sub>ZP</sub> | H            | G            |
|--------------|-----------------|--------------|--------------|
| -2591.082361 | -2589.936351    | -2589.866325 | -2590.046064 |

|    |             |             |             |
|----|-------------|-------------|-------------|
| Zr | 0.03396670  | -0.13787538 | -0.89128777 |
| N  | -0.51902601 | -2.34564393 | -0.62827893 |
| N  | 0.54367205  | 2.28594380  | -0.66178263 |
| C  | 0.38335637  | -3.26496941 | -0.19821341 |
| C  | 1.63704287  | -3.03195259 | 0.38657224  |
| C  | -0.35951360 | 3.19503024  | -0.39756267 |
| C  | -1.66980029 | 2.99189367  | 0.18215383  |
| C  | -1.80181156 | -2.88885759 | -1.05798029 |
| C  | -2.79119708 | -3.18265505 | -0.07524687 |
| C  | -4.01757242 | -3.73410007 | -0.50275436 |
| C  | -4.26674798 | -3.98260873 | -1.86158355 |
| C  | -3.28415715 | -3.67905940 | -2.81562954 |
| C  | -2.03941348 | -3.13043764 | -2.43944278 |
| C  | -3.71848352 | -2.19879071 | 2.10304061  |

|   |             |             |             |
|---|-------------|-------------|-------------|
| C | -2.54631191 | -2.94592679 | 1.42017534  |
| C | -2.26177121 | -4.28479427 | 2.15434933  |
| C | 2.21543322  | -0.55163679 | 4.53263318  |
| C | 2.41159936  | -1.84303973 | 3.69611884  |
| C | 2.53044094  | -3.08650038 | 4.61474898  |
| C | 3.47873594  | -1.70556264 | 1.35043580  |
| C | 3.61757363  | -1.71591838 | 2.76116464  |
| C | 4.92033727  | -1.60460233 | 3.28957770  |
| C | 6.03364417  | -1.49020025 | 2.44084514  |
| C | 5.86433010  | -1.47340068 | 1.04692774  |
| C | 4.58073519  | -1.56862588 | 0.46709453  |
| C | -1.53337163 | -1.87404299 | -4.59790506 |
| C | -0.98864906 | -2.84144659 | -3.51636240 |
| C | -0.47079574 | -4.15777352 | -4.15530288 |
| C | 5.16662638  | -0.37335064 | -1.71975577 |
| C | 4.40998357  | -1.55043182 | -1.05597241 |
| C | 4.86346736  | -2.90230701 | -1.67161832 |
| C | 1.81240756  | 2.80149824  | -1.19053894 |
| C | 1.91478993  | 3.11614858  | -2.56978415 |
| C | 3.14158034  | 3.64696069  | -3.02443144 |
| C | 4.21871344  | 3.84776249  | -2.15050750 |
| C | 4.09263954  | 3.51107241  | -0.79262207 |
| C | 2.89131380  | 2.97899343  | -0.28232600 |
| C | 1.21001773  | 1.97655669  | -4.73274353 |
| C | 0.77061163  | 2.89997008  | -3.56758204 |
| C | 0.22899490  | 4.25446705  | -4.09897053 |
| C | -1.97149892 | 0.87176194  | 4.47046002  |
| C | -2.23710365 | 2.16365751  | 3.65180326  |
| C | -2.32120089 | 3.40428256  | 4.57639371  |
| C | -3.44562339 | 1.84572571  | 1.38340861  |
| C | -3.49325248 | 2.00098565  | 2.78982313  |
| C | -4.76975868 | 1.96740540  | 3.38715624  |
| C | -5.92594253 | 1.78640026  | 2.61029351  |
| C | -5.83197102 | 1.62352139  | 1.21965961  |
| C | -4.58115568 | 1.63804767  | 0.56427546  |
| C | 4.05016453  | 2.17501814  | 1.87093291  |
| C | 2.73900029  | 2.66032700  | 1.21053249  |
| C | 2.19511665  | 3.89585575  | 1.98254063  |
| C | -5.27805451 | 0.19898108  | -1.42860961 |
| C | -4.49753633 | 1.45027607  | -0.95447944 |
| C | -5.00348122 | 2.72076131  | -1.69064388 |
| H | 0.13070849  | -4.31890617 | -0.32629845 |
| H | 2.28531527  | -3.88033698 | 0.57111858  |
| H | -0.14201034 | 4.24420948  | -0.61765807 |
| H | -2.34274220 | 3.83895750  | 0.22488091  |
| H | -4.78269010 | -3.97153309 | 0.23287647  |
| H | -5.21757050 | -4.40980935 | -2.17293549 |
| H | -3.48199180 | -3.87247585 | -3.86736413 |
| H | -1.65714615 | -2.31434850 | 1.52109686  |
| H | 1.51226074  | -1.96479192 | 3.08369626  |
| H | -4.64069380 | -2.79467482 | 2.10196135  |
| H | -3.92588300 | -1.24743296 | 1.60038643  |

|   |             |             |             |
|---|-------------|-------------|-------------|
| H | -3.46758351 | -1.98271734 | 3.15057642  |
| H | -3.12253666 | -4.96327656 | 2.08035368  |
| H | -2.06100445 | -4.10559661 | 3.21984464  |
| H | -1.39240945 | -4.79834895 | 1.72556628  |
| H | 3.08086868  | -0.35549086 | 5.18015235  |
| H | 1.32872659  | -0.64715627 | 5.17405220  |
| H | 2.07203658  | 0.31400917  | 3.87538861  |
| H | 2.63601591  | -4.00691577 | 4.02635041  |
| H | 1.63342977  | -3.18322255 | 5.24083743  |
| H | 3.39857369  | -3.01421080 | 5.28314457  |
| H | 5.06484917  | -1.61245932 | 4.36723545  |
| H | 7.03213909  | -1.41140796 | 2.86514613  |
| H | 6.73424162  | -1.37687926 | 0.40299188  |
| H | -0.13300023 | -2.34422893 | -3.05049174 |
| H | 3.35019048  | -1.41248653 | -1.29509904 |
| H | -2.37180658 | -2.31587782 | -5.15468266 |
| H | -0.73937360 | -1.63272345 | -5.31714664 |
| H | -1.87168697 | -0.94061904 | -4.13387708 |
| H | -1.27845353 | -4.70413824 | -4.66186127 |
| H | -0.03733100 | -4.82558890 | -3.39858956 |
| H | 0.30616651  | -3.93574743 | -4.89903550 |
| H | 4.84180407  | 0.58952723  | -1.30990565 |
| H | 4.95302738  | -0.36372989 | -2.79562277 |
| H | 6.25500981  | -0.45693515 | -1.59263874 |
| H | 5.93201171  | -3.08330141 | -1.48983247 |
| H | 4.69770632  | -2.89390005 | -2.75646992 |
| H | 4.30127370  | -3.74570099 | -1.25067556 |
| H | 3.25161602  | 3.89533489  | -4.07679901 |
| H | 5.15463757  | 4.25660675  | -2.52413576 |
| H | 4.93646288  | 3.66010913  | -0.12572089 |
| H | -0.05135072 | 2.38198490  | -3.06336391 |
| H | -1.36983892 | 2.30310897  | 2.99570143  |
| H | 2.02817446  | 2.41896870  | -5.31759634 |
| H | 0.36382514  | 1.80696584  | -5.41239754 |
| H | 1.53082354  | 1.00978463  | -4.33106442 |
| H | -0.12368127 | 4.90284542  | -3.28399339 |
| H | -0.61128616 | 4.08222436  | -4.78435120 |
| H | 1.00380987  | 4.80594232  | -4.64839935 |
| H | -2.79732109 | 0.66537151  | 5.16411185  |
| H | -1.05100713 | 0.98029562  | 5.05875791  |
| H | -1.85407551 | 0.01015167  | 3.80426683  |
| H | -2.50226073 | 4.32256232  | 4.00280197  |
| H | -1.37963638 | 3.52556548  | 5.12725670  |
| H | -3.12565797 | 3.30627130  | 5.31637987  |
| H | -4.85961325 | 2.08229584  | 4.46381583  |
| H | -6.90085202 | 1.76569856  | 3.09130317  |
| H | -6.73447245 | 1.47024297  | 0.63527384  |
| H | 2.01119519  | 1.84467041  | 1.30663369  |
| H | -3.45567467 | 1.28537519  | -1.25439599 |
| H | 4.80247259  | 2.97354608  | 1.92449225  |
| H | 4.48353523  | 1.32707806  | 1.33033758  |
| H | 3.84812048  | 1.84793768  | 2.89850872  |

|   |             |             |             |
|---|-------------|-------------|-------------|
| H | 2.06546135  | 3.65555375  | 3.04665999  |
| H | 1.22700084  | 4.23470155  | 1.59193937  |
| H | 2.89699398  | 4.73729529  | 1.90681953  |
| H | -4.92671279 | -0.70593584 | -0.92064232 |
| H | -5.11503324 | 0.05641730  | -2.50340494 |
| H | -6.35938923 | 0.29690247  | -1.26061007 |
| H | -4.42863515 | 3.61349531  | -1.40819383 |
| H | -6.06063523 | 2.91845318  | -1.46636122 |
| H | -4.90384990 | 2.58566369  | -2.77469887 |
| O | 1.19346208  | -0.27739794 | -2.32350046 |
| O | -1.57115743 | 0.43664574  | -2.00108424 |
| O | -1.40913862 | 0.74806838  | 0.80321826  |
| O | 1.37940640  | -0.67656045 | 0.76751744  |
| N | -2.11928562 | 1.87678699  | 0.74104546  |
| N | 2.15067968  | -1.83372462 | 0.78453199  |

## Peroxo Complex

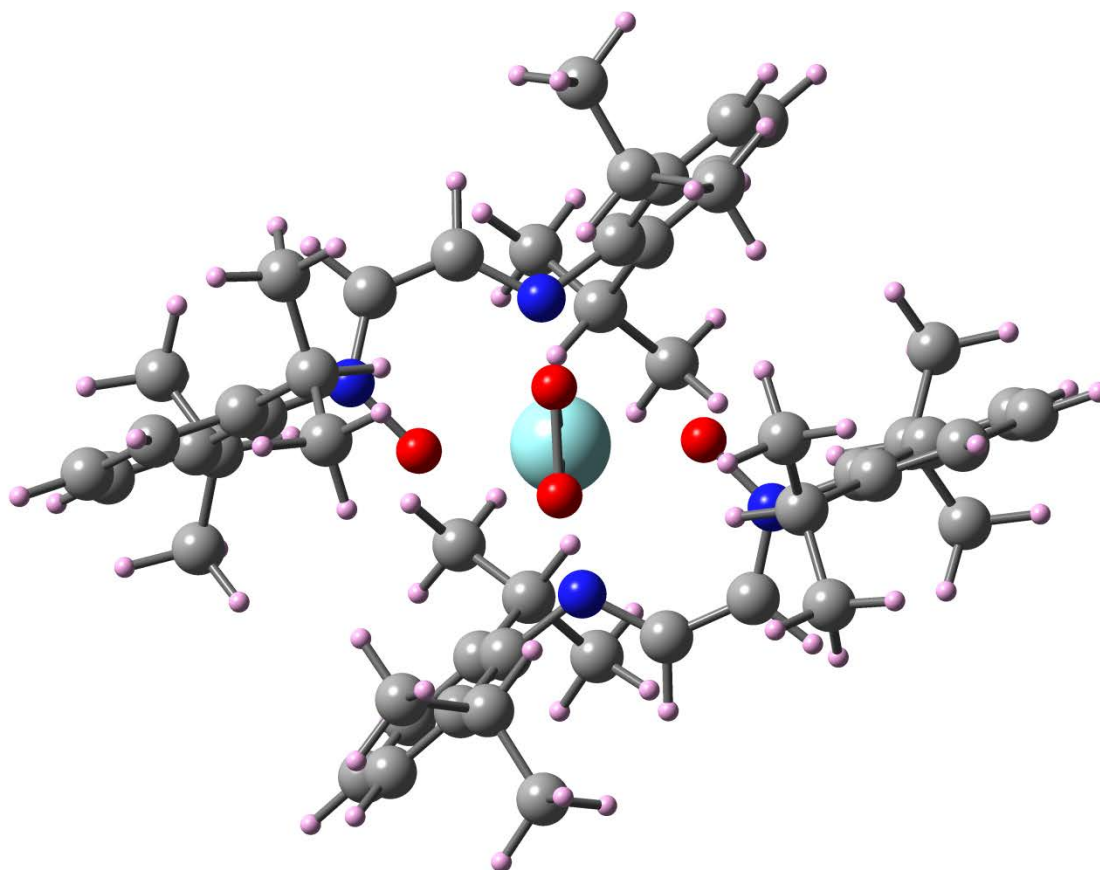

Fig. S76: NCCNO Peroxo Complex

| SCF          | E <sub>ZP</sub> | H            | G            |
|--------------|-----------------|--------------|--------------|
| -2591.081598 | -2589.935344    | -2589.865585 | -2590.048101 |

|    |             |             |             |
|----|-------------|-------------|-------------|
| Zr | -0.00146300 | 0.01280800  | -0.41422603 |
| O  | 2.02630615  | 0.31464102  | 0.06748400  |
| O  | -2.02614316 | -0.33404103 | 0.05673500  |
| O  | -0.12775201 | 0.87029506  | -2.25239617 |
| O  | 0.10070701  | -0.67143305 | -2.32477218 |
| N  | 0.12648201  | -2.17075617 | 0.32391502  |
| N  | -2.80009122 | -1.46879211 | -0.20429902 |
| N  | -0.12831101 | 2.11917216  | 0.52065404  |
| N  | 2.80254621  | 1.46980011  | -0.05742000 |
| C  | -0.93997307 | -3.01678223 | 0.28859202  |
| C  | -2.27419217 | -2.70866221 | -0.00982000 |
| C  | 0.94092807  | 2.95935323  | 0.58801104  |
| C  | 2.27701317  | 2.68129020  | 0.27023502  |
| C  | 1.37841011  | -2.81001521 | 0.72459806  |
| C  | 2.17855716  | -3.46982627 | -0.24850402 |
| C  | 3.34411926  | -4.13582031 | 0.18799501  |

|   |             |             |             |
|---|-------------|-------------|-------------|
| C | 3.71282528  | -4.14935032 | 1.54109312  |
| C | 2.91898723  | -3.48002527 | 2.48511319  |
| C | 1.74729213  | -2.79736121 | 2.09846016  |
| C | 2.97846423  | -3.03020123 | -2.63104720 |
| C | 1.80660614  | -3.50224127 | -1.73478613 |
| C | 1.33091810  | -4.91792037 | -2.15922717 |
| C | -3.24196625 | -0.42725803 | -4.22857832 |
| C | -3.26414725 | -1.48539211 | -3.09797424 |
| C | -3.38774126 | -2.91523022 | -3.69239728 |
| C | -4.14973832 | -1.22977510 | -0.67929505 |
| C | -4.38092333 | -1.23262310 | -2.08021116 |
| C | -5.70768046 | -1.02808208 | -2.51511519 |
| C | -6.74784550 | -0.81961207 | -1.59574612 |
| C | -6.48521848 | -0.81047206 | -0.21634702 |
| C | -5.17759940 | -1.01032008 | 0.27194302  |
| C | 1.72682713  | -1.16062009 | 4.06402431  |
| C | 0.89084107  | -2.10299816 | 3.16259724  |
| C | 0.11952801  | -3.14181524 | 4.02053931  |
| C | -5.45425044 | 0.24088102  | 2.47922919  |
| C | -4.90716037 | -1.02725308 | 1.77835614  |
| C | -5.49044341 | -2.31193618 | 2.42735619  |
| C | -1.38589111 | 2.72371121  | 0.95752107  |
| C | -1.77893914 | 2.58683120  | 2.31765518  |
| C | -2.95668523 | 3.23451124  | 2.74431621  |
| C | -3.73258129 | 3.98909931  | 1.85105514  |
| C | -3.33908026 | 4.09931631  | 0.50926904  |
| C | -2.16653717 | 3.47326127  | 0.03441500  |
| C | -1.78977214 | 0.80203106  | 4.15274032  |
| C | -0.93856407 | 1.79915214  | 3.32830726  |
| C | -0.15664101 | 2.75927221  | 4.26513833  |
| C | 3.24034425  | 0.83884607  | -4.15307732 |
| C | 3.26595625  | 1.79624614  | -2.93551122 |
| C | 3.39473626  | 3.27107825  | -3.40486126 |
| C | 4.15259832  | 1.28842710  | -0.55545204 |
| C | 4.38426034  | 1.44882111  | -1.94688115 |
| C | 5.71342944  | 1.30652710  | -2.39968519 |
| C | 6.75477052  | 1.00697708  | -1.50739711 |
| C | 6.49086051  | 0.83905806  | -0.13817301 |
| C | 5.18103539  | 0.96939607  | 0.36674103  |
| C | -2.92403122 | 3.32424725  | -2.40158718 |
| C | -1.75958814 | 3.64661728  | -1.43280111 |
| C | -1.21875109 | 5.07901339  | -1.69250913 |
| C | 5.49519542  | -0.50725704 | 2.42550518  |
| C | 4.90619737  | 0.81034806  | 1.86406314  |
| C | 5.44121543  | 2.03616015  | 2.65337520  |
| H | -0.75206806 | -4.07087931 | 0.49594004  |
| H | -2.98577523 | -3.51983727 | -0.10699601 |
| H | 0.75406206  | 3.98578730  | 0.90570407  |
| H | 2.99096123  | 3.49606627  | 0.26862502  |
| H | 3.96616230  | -4.64926336 | -0.54098804 |
| H | 4.61060635  | -4.67553036 | 1.85753914  |
| H | 3.21151524  | -3.49061427 | 3.53245527  |

|   |             |             |             |
|---|-------------|-------------|-------------|
| H | 0.97956608  | -2.80712221 | -1.90544114 |
| H | -2.29460917 | -1.41695411 | -2.59596320 |
| H | 3.82832929  | -3.72543429 | -2.59474920 |
| H | 3.33279326  | -2.04154516 | -2.31819618 |
| H | 2.64509620  | -2.96046623 | -3.67449928 |
| H | 2.12533316  | -5.66312744 | -2.01630615 |
| H | 1.04873208  | -4.92171837 | -3.22051725 |
| H | 0.45938304  | -5.24128540 | -1.57495312 |
| H | -4.14592432 | -0.46799104 | -4.85193537 |
| H | -2.37464618 | -0.60534705 | -4.87559637 |
| H | -3.14519924 | 0.58352404  | -3.81880229 |
| H | -3.35350825 | -3.68226428 | -2.90757922 |
| H | -2.56018220 | -3.10432824 | -4.38804934 |
| H | -4.33116533 | -3.03683423 | -4.24221633 |
| H | -5.92455243 | -1.02599208 | -3.57971927 |
| H | -7.76273560 | -0.66266305 | -1.95411715 |
| H | -7.29989754 | -0.64496705 | 0.48372104  |
| H | 0.14213701  | -1.48896811 | 2.64799520  |
| H | -3.82202929 | -1.03900308 | 1.92899615  |
| H | 2.45904319  | -1.71644813 | 4.66416736  |
| H | 1.07221908  | -0.62122605 | 4.76121036  |
| H | 2.27180718  | -0.42381803 | 3.46162227  |
| H | 0.81447506  | -3.79955929 | 4.55945335  |
| H | -0.52283004 | -3.77364429 | 3.39429026  |
| H | -0.51527804 | -2.63688420 | 4.76147436  |
| H | -5.02197539 | 1.14806409  | 2.04323016  |
| H | -5.19842440 | 0.21967702  | 3.54702227  |
| H | -6.54750449 | 0.30635602  | 2.40207918  |
| H | -6.58166151 | -2.35262118 | 2.31131918  |
| H | -5.26343840 | -2.33374118 | 3.50155927  |
| H | -5.07035539 | -3.21806125 | 1.97184715  |
| H | -3.26868125 | 3.14925024  | 3.78250229  |
| H | -4.63610935 | 4.48560634  | 2.19765617  |
| H | -3.94764730 | 4.67953936  | -0.17982301 |
| H | -0.19640101 | 1.21593009  | 2.77011121  |
| H | 2.29673117  | 1.68797013  | -2.43962719 |
| H | -2.51099519 | 1.32032210  | 4.79788437  |
| H | -1.14384309 | 0.19706501  | 4.80269137  |
| H | -2.34792218 | 0.12573401  | 3.49428627  |
| H | 0.49862804  | 3.42660626  | 3.69121028  |
| H | 0.46699004  | 2.19197617  | 4.96956538  |
| H | -0.84596407 | 3.38513126  | 4.84745937  |
| H | 4.14863532  | 0.92569707  | -4.76503236 |
| H | 2.37832118  | 1.07903108  | -4.78704737 |
| H | 3.13323624  | -0.20227902 | -3.83167429 |
| H | 3.36187926  | 3.96880830  | -2.55768419 |
| H | 2.56905620  | 3.52134127  | -4.08324131 |
| H | 4.33911833  | 3.43601026  | -3.94149030 |
| H | 5.93100744  | 1.42640611  | -3.45745727 |
| H | 7.77163361  | 0.90183207  | -1.87886914 |
| H | 7.30617057  | 0.60299005  | 0.54043804  |
| H | -0.95601307 | 2.93977722  | -1.65850013 |



|   |             |             |             |
|---|-------------|-------------|-------------|
| H | 3.82088829  | 0.76660106  | 2.00740415  |
| H | -3.73943829 | 4.05598231  | -2.32105418 |
| H | -3.33570525 | 2.32914818  | -2.19864517 |
| H | -2.56117120 | 3.33921926  | -3.43738826 |
| H | -0.91250807 | 5.18507940  | -2.74180821 |
| H | -0.34898703 | 5.30136938  | -1.06068308 |
| H | -1.98721615 | 5.83603145  | -1.48405512 |
| H | 5.10516239  | -1.37453410 | 1.88154114  |
| H | 5.22380140  | -0.61851205 | 3.48376527  |
| H | 6.59126750  | -0.52215204 | 2.36169118  |
| H | 4.99034838  | 2.97098423  | 2.29583118  |
| H | 6.53058850  | 2.12739916  | 2.54955519  |
| H | 5.21001640  | 1.93357115  | 3.72201228  |

**Oxo Complex with Propylene Oxide Molecule (reaction products of dioxo complex)**

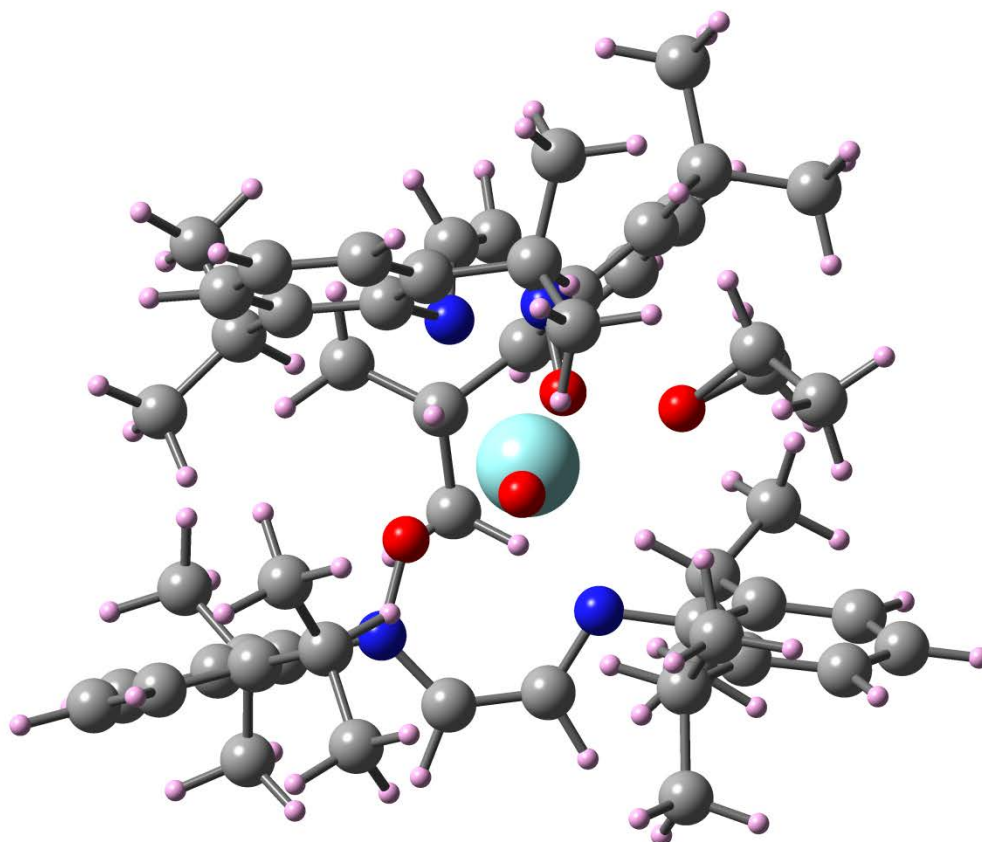

Fig. S77: Oxo Complex with Propylene Oxide Molecule (reaction products of dioxo complex)

| SCF          | E <sub>ZP</sub> | H            | G            |
|--------------|-----------------|--------------|--------------|
| -2709.009799 | -2707.777864    | -2707.704041 | -2707.889924 |

|    |             |             |             |
|----|-------------|-------------|-------------|
| Zr | 0.10023700  | 0.67548900  | 0.34402300  |
| N  | -0.16418200 | 1.62264100  | -1.80389900 |
| N  | 0.20909700  | -0.64695500 | 2.24998700  |
| C  | 0.76628400  | 1.48215400  | -2.78235400 |
| C  | 1.93452400  | 0.70813100  | -2.76297500 |
| C  | -0.68108600 | -1.60069900 | 2.65156100  |
| C  | -1.81238000 | -2.10550500 | 2.00369500  |
| C  | -1.15229400 | 2.66040700  | -2.05499800 |
| C  | -2.45300900 | 2.29939100  | -2.51251300 |
| C  | -3.39964000 | 3.32477200  | -2.72382700 |
| C  | -3.07267900 | 4.67318700  | -2.50119900 |
| C  | -1.77943400 | 5.01393100  | -2.07612300 |
| C  | -0.79610400 | 4.02565300  | -1.84891800 |
| C  | -4.26218000 | 0.46049400  | -2.57295200 |
| C  | -2.79042500 | 0.84402000  | -2.85365400 |
| C  | -2.44868600 | 0.56141000  | -4.34391500 |

|   |             |             |             |
|---|-------------|-------------|-------------|
| C | 2.65351600  | -4.16967200 | -2.63042700 |
| C | 2.77592500  | -2.71107000 | -3.14008400 |
| C | 2.98529500  | -2.68268500 | -4.67776900 |
| C | 3.66500300  | -0.72745100 | -1.74937900 |
| C | 3.89498900  | -1.95532300 | -2.41859400 |
| C | 5.21117600  | -2.46288900 | -2.41982500 |
| C | 6.24762300  | -1.77625400 | -1.76767700 |
| C | 5.98654800  | -0.57187900 | -1.09430400 |
| C | 4.68765900  | -0.02138900 | -1.06239400 |
| C | 0.64034200  | 5.34883700  | -0.17871200 |
| C | 0.62104000  | 4.45490900  | -1.44284700 |
| C | 1.32738000  | 5.16974300  | -2.62731900 |
| C | 5.02159500  | 1.32497600  | 1.09006200  |
| C | 4.42112100  | 1.30133800  | -0.33736500 |
| C | 4.95904500  | 2.49366400  | -1.17486800 |
| C | 1.35885400  | -0.52759900 | 3.14972300  |
| C | 1.41217600  | 0.53475400  | 4.09382600  |
| C | 2.52011700  | 0.61451500  | 4.96222400  |
| C | 3.55300400  | -0.33275100 | 4.91268000  |
| C | 3.48340400  | -1.38303700 | 3.98603800  |
| C | 2.39697100  | -1.50471900 | 3.09285700  |
| C | 0.80485500  | 3.01196500  | 4.07057900  |
| C | 0.28608000  | 1.56139600  | 4.23130200  |
| C | -0.47265100 | 1.37341900  | 5.57319900  |
| C | -1.46665200 | -3.24198200 | -2.95257900 |
| C | -1.63049700 | -3.51715900 | -1.43734900 |
| C | -1.16813400 | -4.95662300 | -1.08223400 |
| C | -3.38828400 | -2.45281400 | 0.13381500  |
| C | -3.07084900 | -3.29229600 | -0.96725600 |
| C | -4.12915800 | -3.98214500 | -1.59355100 |
| C | -5.45081300 | -3.85357200 | -1.13746800 |
| C | -5.73706300 | -3.02897800 | -0.03972400 |
| C | -4.71643500 | -2.30602400 | 0.61446100  |
| C | 3.70038100  | -2.92783500 | 1.40021600  |
| C | 2.35445200  | -2.69950600 | 2.13010000  |
| C | 1.94326700  | -3.99898800 | 2.87822700  |
| C | -6.16825400 | -0.37619000 | 1.44548600  |
| C | -5.07809900 | -1.41772100 | 1.80990700  |
| C | -5.53162500 | -2.26937000 | 3.02583600  |
| H | 0.64368600  | 2.08157800  | -3.68627200 |
| H | 2.63097500  | 0.80644200  | -3.58739800 |
| H | -0.48914600 | -2.07433300 | 3.61597800  |
| H | -2.36176200 | -2.90425100 | 2.48795500  |
| H | -4.39477000 | 3.06988700  | -3.07852000 |
| H | -3.81379900 | 5.45049900  | -2.67472300 |
| H | -1.52396200 | 6.06088800  | -1.92899700 |
| H | -2.16070900 | 0.19828900  | -2.23215500 |
| H | 1.82787000  | -2.20756500 | -2.92128100 |
| H | -4.95941400 | 0.96664600  | -3.25465500 |
| H | -4.55370200 | 0.70384400  | -1.54357800 |
| H | -4.39581300 | -0.62020400 | -2.70695300 |
| H | -3.02872600 | 1.21804600  | -5.00693900 |

|   |             |             |             |
|---|-------------|-------------|-------------|
| H | -2.68608200 | -0.47936700 | -4.60340900 |
| H | -1.38417000 | 0.72675300  | -4.54707700 |
| H | 3.56263400  | -4.74897300 | -2.83781500 |
| H | 1.81658600  | -4.67696700 | -3.12883900 |
| H | 2.47582100  | -4.19219200 | -1.54849700 |
| H | 3.02999400  | -1.65301300 | -5.05481600 |
| H | 2.15868700  | -3.19591600 | -5.18719100 |
| H | 3.92025500  | -3.18462400 | -4.96039800 |
| H | 5.42579400  | -3.39849900 | -2.93023000 |
| H | 7.25701200  | -2.18150400 | -1.78013000 |
| H | 6.79570200  | -0.05703400 | -0.58359000 |
| H | 1.19541800  | 3.56137400  | -1.18640000 |
| H | 3.34201400  | 1.43648600  | -0.21628600 |
| H | 0.02076800  | 6.24928300  | -0.29314700 |
| H | 1.66823000  | 5.67328500  | 0.03035500  |
| H | 0.29451100  | 4.77906600  | 0.68840900  |
| H | 0.81539600  | 6.10557300  | -2.89069600 |
| H | 1.34814500  | 4.53787000  | -3.52481300 |
| H | 2.36368400  | 5.41548100  | -2.35911200 |
| H | 4.65122100  | 0.48730000  | 1.69185900  |
| H | 4.71841400  | 2.25038700  | 1.59433100  |
| H | 6.12011300  | 1.28863600  | 1.07861100  |
| H | 6.04822000  | 2.42867500  | -1.30682000 |
| H | 4.73179300  | 3.43943700  | -0.66620100 |
| H | 4.49827800  | 2.52458900  | -2.17087700 |
| H | 2.57036800  | 1.42373000  | 5.68728100  |
| H | 4.40006700  | -0.25629400 | 5.59080800  |
| H | 4.28248100  | -2.11941400 | 3.95432800  |
| H | -0.42285800 | 1.37708500  | 3.41836000  |
| H | -0.97793600 | -2.81319300 | -0.91449700 |
| H | 1.54861100  | 3.26380900  | 4.83849300  |
| H | -0.02403500 | 3.72913600  | 4.17209700  |
| H | 1.25659400  | 3.12460400  | 3.07913500  |
| H | -0.87865600 | 0.35690500  | 5.66457800  |
| H | -1.30716600 | 2.08597900  | 5.65112400  |
| H | 0.19108600  | 1.54552200  | 6.43080500  |
| H | -2.07096900 | -3.92699900 | -3.56241800 |
| H | -0.41712000 | -3.37338700 | -3.24502800 |
| H | -1.75941700 | -2.21477000 | -3.19600800 |
| H | -1.25066000 | -5.14542700 | -0.00421500 |
| H | -0.11957600 | -5.09929900 | -1.37269800 |
| H | -1.77129100 | -5.71144900 | -1.60483600 |
| H | -3.91576800 | -4.63442500 | -2.43643800 |
| H | -6.25224900 | -4.39745300 | -1.63191600 |
| H | -6.76330400 | -2.93882900 | 0.30754900  |
| H | 1.60118100  | -2.49287400 | 1.36291200  |
| H | -4.17937100 | -0.87066500 | 2.11705600  |
| H | 4.49691300  | -3.22588600 | 2.09500800  |
| H | 4.02556200  | -2.02707900 | 0.87177100  |
| H | 3.59387400  | -3.73319100 | 0.66106000  |
| H | 1.88951900  | -4.84378500 | 2.17744000  |
| H | 0.96553900  | -3.89820500 | 3.36458800  |

|   |             |             |             |
|---|-------------|-------------|-------------|
| H | 2.67944300  | -4.24899000 | 3.65447400  |
| H | -5.88094100 | 0.21688900  | 0.56814000  |
| H | -6.33956000 | 0.30797700  | 2.28769500  |
| H | -7.12526900 | -0.86112200 | 1.21557400  |
| H | -4.75413200 | -2.98179800 | 3.32851900  |
| H | -6.43683600 | -2.84368500 | 2.78992300  |
| H | -5.75538400 | -1.62370300 | 3.88547700  |
| O | 1.22526100  | 1.96441700  | 0.98472700  |
| O | -1.70897600 | 1.97006900  | 0.98758100  |
| O | -1.69841400 | -0.72941700 | 0.05595200  |
| O | 1.45122300  | -0.52692000 | -0.77437200 |
| N | -2.30560600 | -1.73366800 | 0.78374200  |
| N | 2.33645800  | -0.14797000 | -1.78335100 |
| C | -2.49655900 | 2.81087800  | 1.97071800  |
| H | -2.41946900 | 2.39870800  | 2.97542700  |
| C | -3.20452000 | 1.97810800  | 0.94910800  |
| H | -3.65188800 | 1.03137800  | 1.22679300  |
| H | -3.59831800 | 2.46065600  | 0.05946300  |
| C | -2.37068400 | 4.30739300  | 1.84771900  |
| H | -2.38740800 | 4.61863300  | 0.79911100  |
| H | -3.21086100 | 4.78310500  | 2.37324500  |
| H | -1.43913700 | 4.65691900  | 2.30365700  |

## Dioxo Complex with Coordinated Propene Molecule

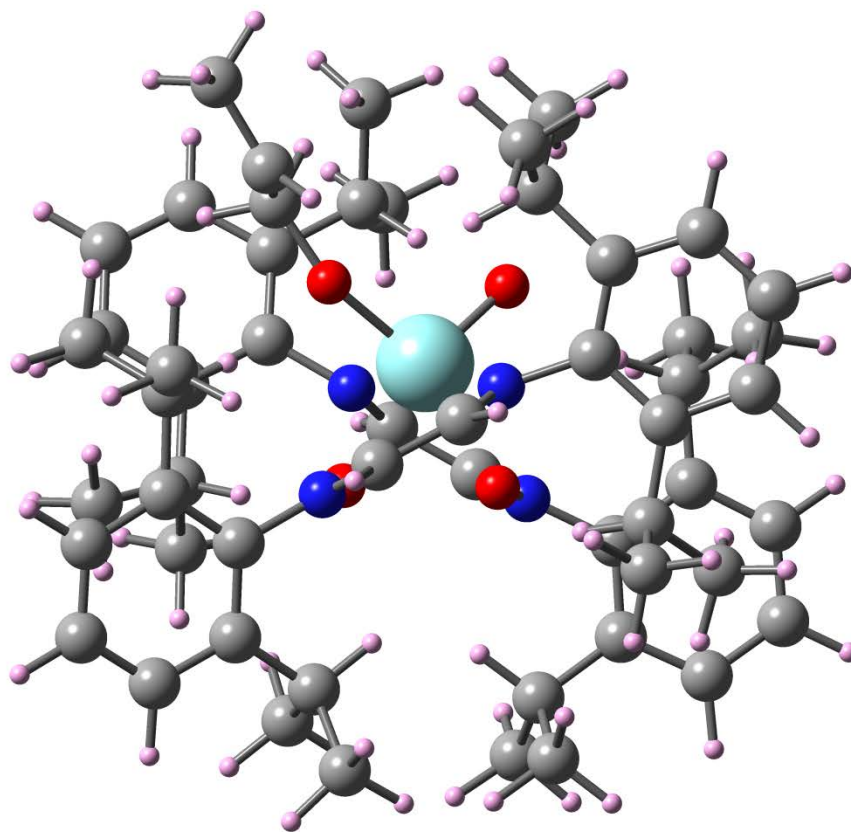

Fig. S78: NCCNO Dioxo Complex with Coordinated Propene Molecule

| SCF          | E <sub>ZP</sub> | H            | G            |
|--------------|-----------------|--------------|--------------|
| -2708.999321 | -2707.771762    | -2707.698350 | -2707.884547 |

|    |             |             |             |
|----|-------------|-------------|-------------|
| Zr | -0.03951200 | 0.87773900  | 0.05214200  |
| N  | -0.37950700 | 0.84921600  | -2.29704600 |
| N  | 0.45938200  | 0.21983700  | 2.27164300  |
| C  | 0.58721800  | 0.56292700  | -3.16728900 |
| C  | 1.87054100  | 0.01697500  | -2.89144900 |
| C  | -0.33918700 | -0.54238300 | 3.02365700  |
| C  | -1.44544700 | -1.34346500 | 2.63066100  |
| C  | -1.56760200 | 1.48457800  | -2.86099500 |
| C  | -2.70519500 | 0.68009100  | -3.15147400 |
| C  | -3.84417200 | 1.31243900  | -3.69079000 |
| C  | -3.85566600 | 2.69367800  | -3.94520300 |
| C  | -2.71862200 | 3.46487000  | -3.66474000 |
| C  | -1.55307200 | 2.88527700  | -3.11625900 |
| C  | -4.03750100 | -1.44815100 | -2.57576800 |
| C  | -2.66919300 | -0.84064400 | -2.95958000 |
| C  | -2.13342700 | -1.53325900 | -4.24474400 |

|   |             |             |             |
|---|-------------|-------------|-------------|
| C | 2.89538900  | -4.44941800 | -1.01496700 |
| C | 2.91864400  | -3.33480200 | -2.09319900 |
| C | 3.11555600  | -3.93706300 | -3.50918600 |
| C | 3.69393100  | -0.92318300 | -1.57562000 |
| C | 3.99451100  | -2.29133400 | -1.77862800 |
| C | 5.34874400  | -2.67518700 | -1.68467000 |
| C | 6.34608700  | -1.73166700 | -1.39066600 |
| C | 6.00840700  | -0.38648800 | -1.17163400 |
| C | 4.66942000  | 0.05364800  | -1.25006700 |
| C | -0.65694300 | 5.09386100  | -2.15362000 |
| C | -0.31562700 | 3.75883500  | -2.86070900 |
| C | 0.42964800  | 4.04903600  | -4.19368100 |
| C | 4.96816900  | 2.08421600  | 0.27655900  |
| C | 4.31627200  | 1.52615300  | -1.01290400 |
| C | 4.72600700  | 2.38598600  | -2.23972800 |
| C | 1.61835600  | 0.76674300  | 2.98071000  |
| C | 1.60025200  | 2.11713600  | 3.42280300  |
| C | 2.72214000  | 2.60134000  | 4.12773800  |
| C | 3.82680400  | 1.78009900  | 4.39385500  |
| C | 3.82661200  | 0.44952400  | 3.94880300  |
| C | 2.73361100  | -0.08449100 | 3.23405300  |
| C | 0.79315100  | 4.33672400  | 2.45928300  |
| C | 0.39750600  | 3.04108200  | 3.21099500  |
| C | -0.29579200 | 3.36117800  | 4.56281800  |
| C | -1.18794200 | -4.51048000 | -1.23682400 |
| C | -1.32223900 | -4.32194800 | 0.29788200  |
| C | -0.96386900 | -5.62564700 | 1.05580200  |
| C | -2.98515500 | -2.52633200 | 1.15055900  |
| C | -2.72985000 | -3.82693500 | 0.64557500  |
| C | -3.83939000 | -4.67605300 | 0.45572800  |
| C | -5.14084900 | -4.24694600 | 0.76140800  |
| C | -5.35995700 | -2.94914400 | 1.24683400  |
| C | -4.28941300 | -2.05010200 | 1.44238700  |
| C | 4.14087600  | -1.94227100 | 2.16177600  |
| C | 2.77475300  | -1.54923200 | 2.77569200  |
| C | 2.44037300  | -2.51173000 | 3.94969900  |
| C | -5.64423500 | 0.08478500  | 1.07608500  |
| C | -4.57518300 | -0.62829800 | 1.94241200  |
| C | -5.01485100 | -0.64100300 | 3.43133900  |
| H | 0.42614500  | 0.80145300  | -4.22040500 |
| H | 2.59416400  | -0.00894900 | -3.69664400 |
| H | -0.13921400 | -0.58516400 | 4.09689600  |
| H | -2.02145600 | -1.82020300 | 3.41364800  |
| H | -4.72671400 | 0.72137800  | -3.91799900 |
| H | -4.74292800 | 3.16301700  | -4.36445000 |
| H | -2.73342600 | 4.53182100  | -3.87144100 |
| H | -1.97345100 | -1.05972200 | -2.14131800 |
| H | 1.93897300  | -2.84509800 | -2.06947100 |
| H | -4.75699000 | -1.40114300 | -3.40473200 |
| H | -4.47267000 | -0.93305500 | -1.71269800 |
| H | -3.91542100 | -2.50580200 | -2.30914800 |
| H | -2.78981700 | -1.32470600 | -5.10063100 |

|   |             |             |             |
|---|-------------|-------------|-------------|
| H | -2.09331100 | -2.62207300 | -4.10305900 |
| H | -1.12504000 | -1.18784300 | -4.50127700 |
| H | 3.85435900  | -4.98127900 | -0.96355600 |
| H | 2.11751200  | -5.18873800 | -1.24706900 |
| H | 2.68544200  | -4.02649500 | -0.02544500 |
| H | 3.10335400  | -3.15597000 | -4.28018600 |
| H | 2.31250200  | -4.65102700 | -3.73527000 |
| H | 4.07202300  | -4.47037500 | -3.58768600 |
| H | 5.62304300  | -3.71529400 | -1.84201400 |
| H | 7.38537500  | -2.04571600 | -1.32591500 |
| H | 6.78863200  | 0.32936600  | -0.92931200 |
| H | 0.36526700  | 3.22193800  | -2.19162300 |
| H | 3.23388700  | 1.63188300  | -0.87414900 |
| H | -1.26973800 | 5.75451900  | -2.78243100 |
| H | 0.27066100  | 5.62859200  | -1.91233500 |
| H | -1.19352800 | 4.91686900  | -1.21460200 |
| H | -0.21190500 | 4.60728700  | -4.88981900 |
| H | 0.74091100  | 3.12452000  | -4.69679900 |
| H | 1.32890200  | 4.64977300  | -4.00208400 |
| H | 4.69454300  | 1.48531300  | 1.15255200  |
| H | 4.60500500  | 3.10442100  | 0.44925100  |
| H | 6.06470000  | 2.12234800  | 0.20818000  |
| H | 5.81162100  | 2.35112100  | -2.40856500 |
| H | 4.43794400  | 3.43132000  | -2.07157500 |
| H | 4.23012700  | 2.04436600  | -3.15796600 |
| H | 2.72521800  | 3.63184700  | 4.47418600  |
| H | 4.68054200  | 2.17196700  | 4.94208900  |
| H | 4.68812100  | -0.18059700 | 4.15327500  |
| H | -0.33406700 | 2.52306400  | 2.58356000  |
| H | -0.59673800 | -3.55540300 | 0.58631100  |
| H | 1.53406300  | 4.92322500  | 3.02014700  |
| H | -0.09329000 | 4.97038800  | 2.31497400  |
| H | 1.20216800  | 4.07892000  | 1.47630400  |
| H | -0.61271300 | 2.44509700  | 5.08056200  |
| H | -1.18435900 | 3.98419100  | 4.39318000  |
| H | 0.37687500  | 3.90914600  | 5.23640000  |
| H | -1.89441900 | -5.26391200 | -1.61051100 |
| H | -0.17357800 | -4.84055000 | -1.49444000 |
| H | -1.38200200 | -3.56489500 | -1.75458300 |
| H | -1.04834600 | -5.49222400 | 2.14203400  |
| H | 0.06934700  | -5.91943400 | 0.82824100  |
| H | -1.61728700 | -6.45930600 | 0.76715000  |
| H | -3.68208600 | -5.68126000 | 0.07364900  |
| H | -5.98227700 | -4.92008400 | 0.61526400  |
| H | -6.37337800 | -2.62322100 | 1.46428800  |
| H | 2.02044600  | -1.68100600 | 1.99204900  |
| H | -3.66207200 | -0.03012300 | 1.86168100  |
| H | 4.94299900  | -1.93566600 | 2.91183500  |
| H | 4.42439300  | -1.26416500 | 1.35113600  |
| H | 4.08737700  | -2.95896900 | 1.75073400  |
| H | 2.46718500  | -3.55623800 | 3.60941300  |
| H | 1.44592400  | -2.31773500 | 4.36984900  |



|   |             |             |             |
|---|-------------|-------------|-------------|
| H | 3.17279200  | -2.40046800 | 4.76079300  |
| H | -5.34727500 | 0.10217900  | 0.02175600  |
| H | -5.75389300 | 1.12287000  | 1.41330900  |
| H | -6.62579900 | -0.40181700 | 1.14990700  |
| H | -4.25475700 | -1.09878700 | 4.07773900  |
| H | -5.94773900 | -1.20525400 | 3.56329700  |
| H | -5.18580500 | 0.38461500  | 3.78293300  |
| O | 1.15573100  | 2.26520500  | -0.11071700 |
| O | -1.78925700 | 1.73891700  | 0.49969800  |
| O | -1.18210700 | -1.20882500 | 0.28085700  |
| O | 1.49613400  | -0.63525000 | -0.63898700 |
| N | -1.84237600 | -1.64111400 | 1.37630500  |
| N | 2.30818000  | -0.48207500 | -1.72177600 |
| C | -3.36738700 | 2.96280400  | 1.91950300  |
| H | -2.91934000 | 2.42806800  | 2.75593300  |
| C | -2.76385400 | 2.77792800  | 0.55187400  |
| H | -3.56299100 | 2.56145000  | -0.18471300 |
| H | -2.30499200 | 3.73410600  | 0.22094100  |
| C | -4.37140000 | 4.06026300  | 2.15615500  |
| H | -5.10523000 | 4.11870200  | 1.33619500  |
| H | -4.92229700 | 3.91444600  | 3.09408300  |
| H | -3.89321600 | 5.05607900  | 2.21431400  |

## 6.4 Structures with five oxygen atoms

 $\eta^2$ -ozone Complex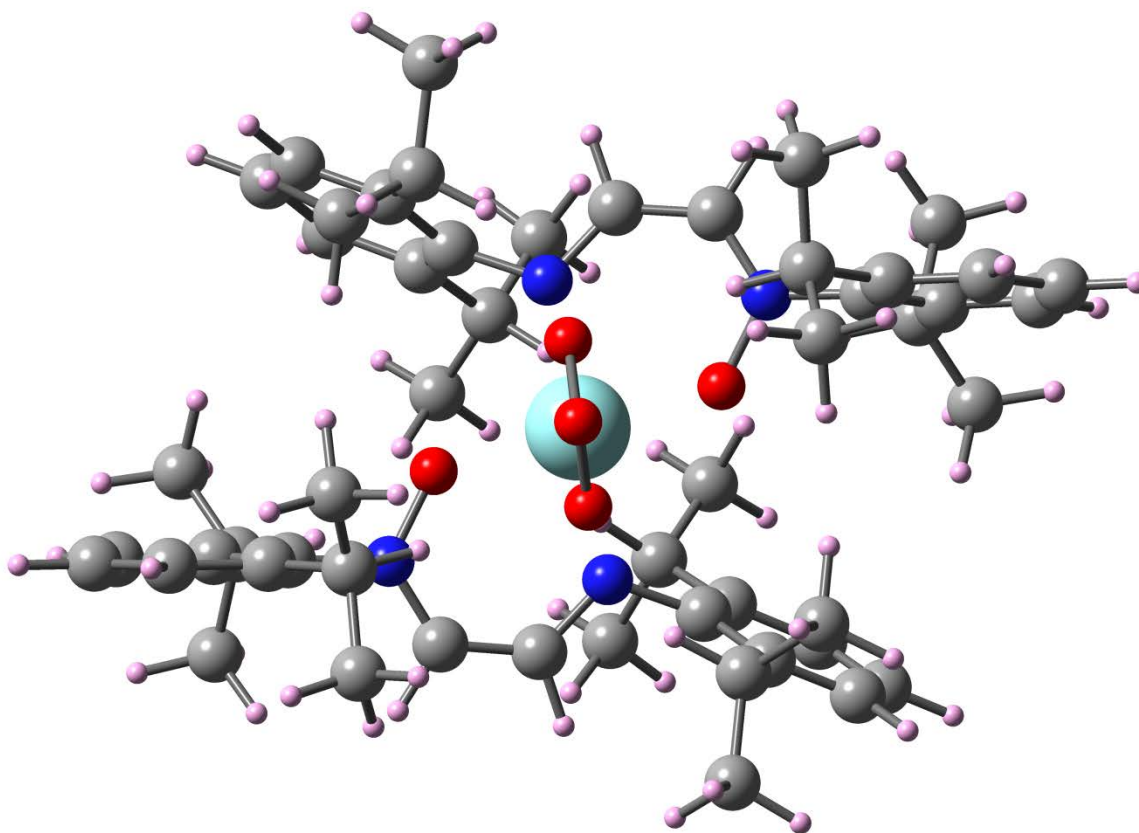Fig. S79: NCCNO  $\eta^2$ -ozone Complex

| SCF          | E <sub>ZP</sub> | H            | G            |
|--------------|-----------------|--------------|--------------|
| -2666.226166 | -2665.075984    | -2665.005465 | -2665.186472 |

|    |             |             |             |
|----|-------------|-------------|-------------|
| Zr | 0.00242412  | -0.04414539 | -0.45288925 |
| O  | -2.03872843 | 0.26930668  | -0.04388547 |
| O  | 2.03934589  | -0.27252712 | 0.00772849  |
| O  | -0.03811094 | 0.91994149  | -2.32103919 |
| N  | -0.09205857 | -2.03288781 | 0.67910993  |
| N  | 2.84053992  | -1.41263683 | 0.00535389  |
| N  | 0.09214835  | 2.13190166  | 0.24666671  |
| N  | -2.83555373 | 1.38256151  | -0.30626252 |
| C  | 0.98916921  | -2.86279695 | 0.76487305  |
| C  | 2.31993019  | -2.59971051 | 0.41743319  |
| C  | -0.98708974 | 2.96205058  | 0.13637743  |
| C  | -2.31439122 | 2.63063919  | -0.16167855 |
| C  | -1.33500210 | -2.63779496 | 1.16798199  |
| C  | -1.74888832 | -2.36719374 | 2.50281419  |

|   |             |             |             |
|---|-------------|-------------|-------------|
| C | -2.91653385 | -2.99313543 | 2.98515988  |
| C | -3.66231573 | -3.86176046 | 2.17402732  |
| C | -3.23926668 | -4.11960708 | 0.86336425  |
| C | -2.07422221 | -3.52271589 | 0.33345948  |
| C | -1.79325476 | -0.47890916 | 4.23899913  |
| C | -0.92446541 | -1.48394189 | 3.44462804  |
| C | -0.08461881 | -2.36266667 | 4.41274526  |
| C | 5.45799352  | 0.69157456  | 2.49984823  |
| C | 4.86724794  | -0.63930146 | 1.97286070  |
| C | 5.34840303  | -1.83613619 | 2.83831338  |
| C | 4.21034434  | -1.24808569 | -0.44771567 |
| C | 5.19933762  | -0.87400037 | 0.49726521  |
| C | 6.52803109  | -0.76365033 | 0.03907756  |
| C | 6.84838515  | -1.00440740 | -1.30683491 |
| C | 5.84579038  | -1.35974904 | -2.22226306 |
| C | 4.49968425  | -1.48505734 | -1.81705498 |
| C | -2.77248553 | -3.53608564 | -2.11566000 |
| C | -1.65372409 | -3.87218979 | -1.09768708 |
| C | -1.24045810 | -5.36409790 | -1.21045761 |
| C | 3.45836021  | -1.02382703 | -4.10617025 |
| C | 3.42560691  | -1.89833825 | -2.82782971 |
| C | 3.57221336  | -3.40104027 | -3.19227482 |
| C | 1.32547911  | 2.82601834  | 0.62992602  |
| C | 2.09137507  | 3.51709842  | -0.35080678 |
| C | 3.23748635  | 4.22369588  | 0.07516908  |
| C | 3.61693595  | 4.25786420  | 1.42362427  |
| C | 2.84792387  | 3.57409802  | 2.37719947  |
| C | 1.69852458  | 2.84803619  | 2.00348739  |
| C | 2.87163979  | 2.97891563  | -2.71155038 |
| C | 1.72282898  | 3.54359054  | -1.83774528 |
| C | 1.33759732  | 4.97574562  | -2.29506610 |
| C | -5.44787771 | -0.07016614 | 2.60270290  |
| C | -4.87092037 | 1.11155919  | 1.78484055  |
| C | -5.37160687 | 2.46844426  | 2.35104828  |
| C | -4.20692429 | 1.12501342  | -0.70975866 |
| C | -5.19925355 | 0.99396118  | 0.29441299  |
| C | -6.52880787 | 0.78823500  | -0.12799903 |
| C | -6.84630723 | 0.70572883  | -1.49322713 |
| C | -5.84016596 | 0.82612366  | -2.46446028 |
| C | -4.49370734 | 1.03408001  | -2.09698053 |
| C | 1.71132121  | 1.31938794  | 4.05830496  |
| C | 0.85520275  | 2.17106045  | 3.08861963  |
| C | 0.02727209  | 3.22557918  | 3.87275991  |
| C | -3.47661206 | 0.07903086  | -4.24248057 |
| C | -3.41390309 | 1.19528493  | -3.17072841 |
| C | -3.51745816 | 2.59446648  | -3.83795266 |
| H | 0.81128851  | -3.87342986 | 1.13288150  |
| H | 3.03752562  | -3.40935990 | 0.46946111  |
| H | -0.81018574 | 4.02816340  | 0.28019209  |
| H | -3.02932739 | 3.43318695  | -0.29620150 |
| H | -3.24294092 | -2.80495713 | 4.00468366  |
| H | -4.56032803 | -4.33659184 | 2.56269178  |

|   |             |             |             |
|---|-------------|-------------|-------------|
| H | -3.81731812 | -4.79615183 | 0.23856408  |
| H | -0.21798815 | -0.90565469 | 2.83741855  |
| H | 3.77799244  | -0.57105353 | 2.06996904  |
| H | -2.47741177 | -0.98938046 | 4.92878704  |
| H | -2.39299099 | 0.14361415  | 3.56456688  |
| H | -1.15623053 | 0.18087492  | 4.84183832  |
| H | -0.73765533 | -2.97977521 | 5.04415737  |
| H | 0.53338806  | -1.73597870 | 5.06969551  |
| H | 0.58170931  | -3.03657777 | 3.85981572  |
| H | 6.55579151  | 0.68161537  | 2.48890233  |
| H | 5.13971724  | 0.85739915  | 3.53757967  |
| H | 5.11312458  | 1.54030358  | 1.89912436  |
| H | 4.89383131  | -2.77915154 | 2.50824235  |
| H | 5.08006982  | -1.67918503 | 3.89149749  |
| H | 6.43892965  | -1.95029051 | 2.77928985  |
| H | 7.31422512  | -0.48557464 | 0.73564661  |
| H | 7.87909114  | -0.91312104 | -1.64195536 |
| H | 6.10701867  | -1.53728561 | -3.26184309 |
| H | -0.79269827 | -3.26173935 | -1.37795796 |
| H | 2.43615687  | -1.76551946 | -2.38067557 |
| H | -3.66713057 | -4.15564815 | -1.96316478 |
| H | -2.41097814 | -3.70719554 | -3.13785161 |
| H | -3.06588863 | -2.48365113 | -2.03165677 |
| H | -2.07740746 | -6.03338980 | -0.96856850 |
| H | -0.41282223 | -5.60526958 | -0.52979590 |
| H | -0.91397514 | -5.58839512 | -2.23466982 |
| H | 3.37425297  | 0.04033577  | -3.85955740 |
| H | 2.60784054  | -1.28285653 | -4.74760978 |
| H | 4.38044144  | -1.17528066 | -4.68414461 |
| H | 4.54211921  | -3.60327638 | -3.66705827 |
| H | 2.78015573  | -3.69386819 | -3.89300803 |
| H | 3.49087813  | -4.04051374 | -2.30337615 |
| H | 3.83370475  | 4.75537179  | -0.66232437 |
| H | 4.49921710  | 4.81499642  | 1.73045498  |
| H | 3.14043848  | 3.61162237  | 3.42357074  |
| H | 0.86213018  | 2.89342667  | -2.00753982 |
| H | -3.78118858 | 1.08302238  | 1.89662053  |
| H | 3.77188053  | 3.60690847  | -2.66142165 |
| H | 2.55196806  | 2.92523383  | -3.76026660 |
| H | 3.14145909  | 1.96792152  | -2.38583032 |
| H | 0.48987232  | 5.36767212  | -1.71689677 |
| H | 1.05100410  | 4.96865204  | -3.35506872 |
| H | 2.17505317  | 5.67677910  | -2.17601136 |
| H | -6.54524221 | -0.08354080 | 2.57623235  |
| H | -5.14402739 | 0.01769219  | 3.65425983  |
| H | -5.08088144 | -1.02910605 | 2.22093838  |
| H | -4.93365589 | 3.31630764  | 1.80875141  |
| H | -5.09984546 | 2.56455689  | 3.41065852  |
| H | -6.46401440 | 2.54847611  | 2.27300968  |
| H | -7.31786316 | 0.68888986  | 0.61259718  |
| H | -7.87749335 | 0.54552997  | -1.79980510 |
| H | -6.09935465 | 0.75308983  | -3.51690861 |

|   |             |             |             |
|---|-------------|-------------|-------------|
| H | 0.14236922  | 1.49902316  | 2.59677179  |
| H | -2.42710107 | 1.12958659  | -2.70344701 |
| H | 2.41574669  | 1.93792861  | 4.62886356  |
| H | 2.28942788  | 0.56403153  | 3.51268089  |
| H | 1.06782910  | 0.80405363  | 4.78260610  |
| H | -0.60691823 | 2.73924202  | 4.62626067  |
| H | -0.62131910 | 3.79981385  | 3.19940006  |
| H | 0.68750414  | 3.93515261  | 4.38914474  |
| H | -3.42985472 | -0.91463628 | -3.78308227 |
| H | -2.61738577 | 0.17243854  | -4.91704536 |
| H | -4.39212045 | 0.13875961  | -4.84719029 |
| H | -3.41763249 | 3.40097777  | -3.09974046 |
| H | -4.48140201 | 2.72106143  | -4.34992661 |
| H | -2.71694919 | 2.71415368  | -4.57876873 |
| O | -0.00326156 | -0.31676620 | -3.18364389 |
| O | 0.03912234  | -1.36029426 | -2.09511134 |

Oxo Complex with weakly adsorbed O<sub>2</sub> molecule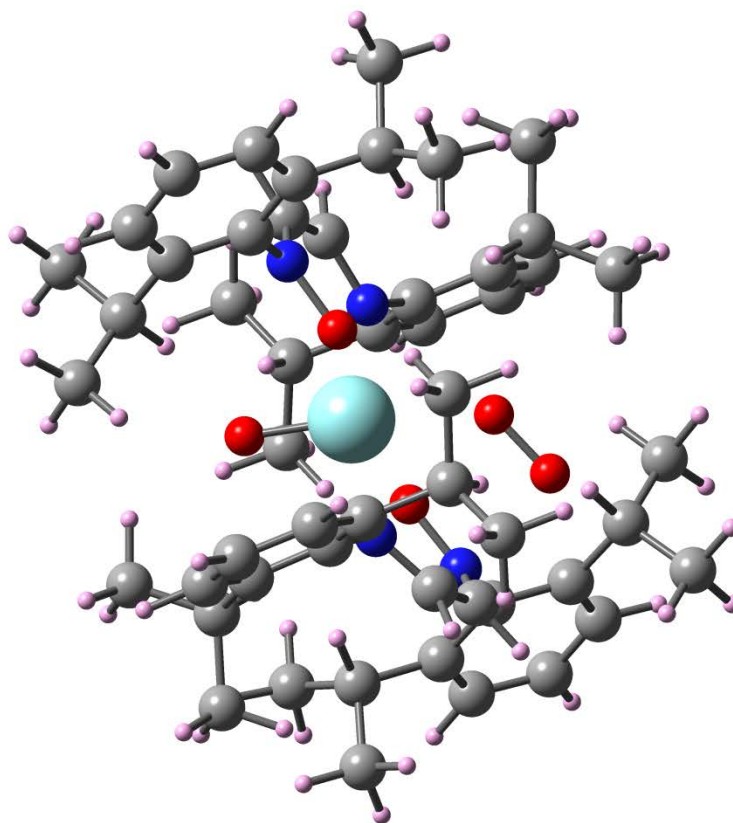Fig. S80: NCCNO Oxo Complex with weakly adsorbed O<sub>2</sub> molecule

| SCF          | E <sub>ZP</sub> | H            | G            |
|--------------|-----------------|--------------|--------------|
| -2666.255567 | -2665.105301    | -2665.034245 | -2665.214683 |

|    |             |             |             |
|----|-------------|-------------|-------------|
| Zr | -0.12302900 | -0.07182000 | -0.32584400 |
| O  | -2.10288200 | 0.53492900  | 0.17482800  |
| O  | 2.06764900  | -0.38916100 | -0.18690200 |
| O  | -0.48387500 | -0.79069300 | -1.95444200 |
| N  | 0.03282900  | -2.08002800 | 0.92278700  |
| N  | 2.87350900  | -1.05112300 | 0.69236500  |
| N  | -0.02606400 | 2.11683700  | -0.97964900 |
| N  | -2.95118600 | 1.25271400  | -0.67278600 |
| C  | 1.05147800  | -2.40211700 | 1.69876300  |
| C  | 2.39211800  | -1.89222800 | 1.60480600  |
| C  | -1.13252400 | 2.72626400  | -1.48581700 |
| C  | -2.46370900 | 2.29854900  | -1.40013900 |
| C  | -1.15981700 | -2.92856400 | 0.99627800  |
| C  | -2.05259600 | -2.84761900 | 2.10050300  |
| C  | -3.20064200 | -3.66924700 | 2.07779200  |
| C  | -3.44834600 | -4.55047900 | 1.01706500  |

|   |             |             |             |
|---|-------------|-------------|-------------|
| C | -2.53489500 | -4.63724900 | -0.04500600 |
| C | -1.37668100 | -3.83552100 | -0.08135200 |
| C | -2.94311600 | -0.83705800 | 3.37543300  |
| C | -1.83492200 | -1.91799500 | 3.29918900  |
| C | -1.74393200 | -2.71584900 | 4.62705000  |
| C | 4.80403700  | 2.38992000  | 2.27310800  |
| C | 4.37015100  | 0.90641200  | 2.36131400  |
| C | 4.67352100  | 0.33388000  | 3.77339700  |
| C | 4.31890800  | -0.88504000 | 0.49090700  |
| C | 5.03182100  | 0.04837600  | 1.28014700  |
| C | 6.42454600  | 0.13562700  | 1.06304300  |
| C | 7.06074300  | -0.65656400 | 0.09694600  |
| C | 6.31881100  | -1.56304000 | -0.67763200 |
| C | 4.92735200  | -1.69867100 | -0.50070500 |
| C | -0.97697400 | -4.02191000 | -2.61396900 |
| C | -0.34887800 | -4.04163200 | -1.20080800 |
| C | 0.43553800  | -5.36050600 | -0.95384100 |
| C | 4.51725300  | -2.73091900 | -2.81370800 |
| C | 4.13978900  | -2.73437900 | -1.31187700 |
| C | 4.34143100  | -4.15259100 | -0.70828900 |
| C | 1.19620700  | 2.90475500  | -1.03851700 |
| C | 2.06534000  | 2.77054300  | -2.15600200 |
| C | 3.23105100  | 3.56539900  | -2.19244400 |
| C | 3.52554800  | 4.47145200  | -1.16227900 |
| C | 2.65144000  | 4.59592700  | -0.07031200 |
| C | 1.47730300  | 3.81940200  | 0.01665500  |
| C | 2.89442100  | 0.81425300  | -3.56783800 |
| C | 1.74997200  | 1.82828500  | -3.32284600 |
| C | 1.43586600  | 2.63017200  | -4.61406700 |
| C | -4.88645000 | 2.48705200  | 2.84380300  |
| C | -4.47826700 | 2.70309500  | 1.36477400  |
| C | -4.82821700 | 4.14770300  | 0.91329200  |
| C | -4.37113000 | 0.97555400  | -0.55381400 |
| C | -5.12068700 | 1.67492900  | 0.42763200  |
| C | -6.50654400 | 1.42082900  | 0.49061300  |
| C | -7.11054200 | 0.50141200  | -0.38196100 |
| C | -6.34039700 | -0.18648400 | -1.33308400 |
| C | -4.94956100 | 0.02920900  | -1.43721900 |
| C | 1.22908200  | 3.94344700  | 2.57005300  |
| C | 0.51727700  | 4.01205900  | 1.19702700  |
| C | -0.26010200 | 5.34908300  | 1.05234000  |
| C | -4.46786400 | -2.20214700 | -2.59150100 |
| C | -4.12088800 | -0.69647200 | -2.50129000 |
| C | -4.30393600 | -0.01445000 | -3.88550900 |
| H | 0.93173200  | -3.19726100 | 2.43761100  |
| H | 3.13191200  | -2.31103700 | 2.27589000  |
| H | -0.98935500 | 3.66382700  | -2.02525400 |
| H | -3.22058300 | 2.86093700  | -1.93349000 |
| H | -3.90626800 | -3.61442600 | 2.90298100  |
| H | -4.34059500 | -5.17221200 | 1.02147000  |
| H | -2.71956500 | -5.33975300 | -0.85325600 |
| H | -0.88911600 | -1.38839600 | 3.17522900  |

|   |             |             |             |
|---|-------------|-------------|-------------|
| H | 3.28499100  | 0.87389700  | 2.22444500  |
| H | -3.93360000 | -1.28890700 | 3.52410600  |
| H | -2.96426200 | -0.24800300 | 2.45267400  |
| H | -2.74858200 | -0.15876800 | 4.21726800  |
| H | -2.68351600 | -3.23709100 | 4.85233500  |
| H | -1.53176700 | -2.03320600 | 5.46043000  |
| H | -0.94564000 | -3.46985000 | 4.59173300  |
| H | 5.87387700  | 2.51640700  | 2.48531400  |
| H | 4.24992300  | 2.98093000  | 3.01251600  |
| H | 4.59416500  | 2.80562800  | 1.28148200  |
| H | 4.32074800  | -0.70035300 | 3.87707400  |
| H | 4.16907600  | 0.93591400  | 4.53922200  |
| H | 5.75202000  | 0.34548300  | 3.98103100  |
| H | 7.01066000  | 0.83553400  | 1.65109300  |
| H | 8.13396000  | -0.56825500 | -0.05408700 |
| H | 6.82395800  | -2.16815900 | -1.42468700 |
| H | 0.36244800  | -3.21160500 | -1.17550600 |
| H | 3.07395000  | -2.48833200 | -1.25404800 |
| H | -1.74986700 | -4.79230400 | -2.73927400 |
| H | -0.19948700 | -4.20545400 | -3.36806100 |
| H | -1.40574500 | -3.03510700 | -2.81040900 |
| H | -0.23264100 | -6.23109300 | -0.99608700 |
| H | 0.92368100  | -5.36328300 | 0.03068900  |
| H | 1.21038800  | -5.49223200 | -1.72147800 |
| H | 4.41158500  | -1.73121000 | -3.24828100 |
| H | 3.85450200  | -3.41176000 | -3.36287300 |
| H | 5.54784800  | -3.07164700 | -2.97793200 |
| H | 5.39636300  | -4.45252200 | -0.75980900 |
| H | 3.74862800  | -4.89031300 | -1.26369900 |
| H | 4.03182200  | -4.19294500 | 0.34418100  |
| H | 3.90862200  | 3.47867200  | -3.03879300 |
| H | 4.42541400  | 5.08071000  | -1.21239100 |
| H | 2.88172100  | 5.30603500  | 0.72057800  |
| H | 0.85729300  | 1.24599100  | -3.07327100 |
| H | -3.39049500 | 2.58630100  | 1.30887500  |
| H | 3.82485400  | 1.31330500  | -3.87226200 |
| H | 2.60884900  | 0.11395500  | -4.36413600 |
| H | 3.09155700  | 0.23897800  | -2.65670100 |
| H | 0.59045100  | 3.31433700  | -4.46318800 |
| H | 1.17699700  | 1.94473000  | -5.43214300 |
| H | 2.29976600  | 3.22931900  | -4.93314200 |
| H | -5.95754800 | 2.66905900  | 3.00170600  |
| H | -4.33483600 | 3.18331900  | 3.48924200  |
| H | -4.66125100 | 1.46660100  | 3.17150000  |
| H | -4.49930700 | 4.33696800  | -0.11606400 |
| H | -4.33813500 | 4.88159400  | 1.56682800  |
| H | -5.91176400 | 4.32123600  | 0.95870000  |
| H | -7.11493400 | 1.94149900  | 1.22532200  |
| H | -8.18121900 | 0.31962500  | -0.31926500 |
| H | -6.82201100 | -0.89947800 | -1.99608700 |
| H | -0.21195200 | 3.19627100  | 1.17762900  |
| H | -3.06013900 | -0.62242000 | -2.23727000 |



|   |             |             |             |
|---|-------------|-------------|-------------|
| H | 1.98065200  | 4.73617000  | 2.68504100  |
| H | 1.71949100  | 2.97339700  | 2.70546200  |
| H | 0.49433800  | 4.06139000  | 3.37774600  |
| H | -0.97243800 | 5.47032900  | 1.87997900  |
| H | -0.82187200 | 5.38367300  | 0.11024500  |
| H | 0.42558100  | 6.20724200  | 1.06619300  |
| H | -4.35037000 | -2.69496400 | -1.61921700 |
| H | -3.79253600 | -2.69271500 | -3.30291100 |
| H | -5.49542600 | -2.36835000 | -2.94287900 |
| H | -4.00603900 | 1.04118800  | -3.85372500 |
| H | -5.35064600 | -0.06423800 | -4.21668000 |
| H | -3.68031000 | -0.51644200 | -4.63621900 |
| O | 0.23938100  | 0.50410000  | 2.07153200  |
| O | 1.12862900  | -0.00436500 | 2.93309600  |

**Oxo Complex with adsorbed O<sub>2</sub> molecule (planar conformation 1 lower energy)**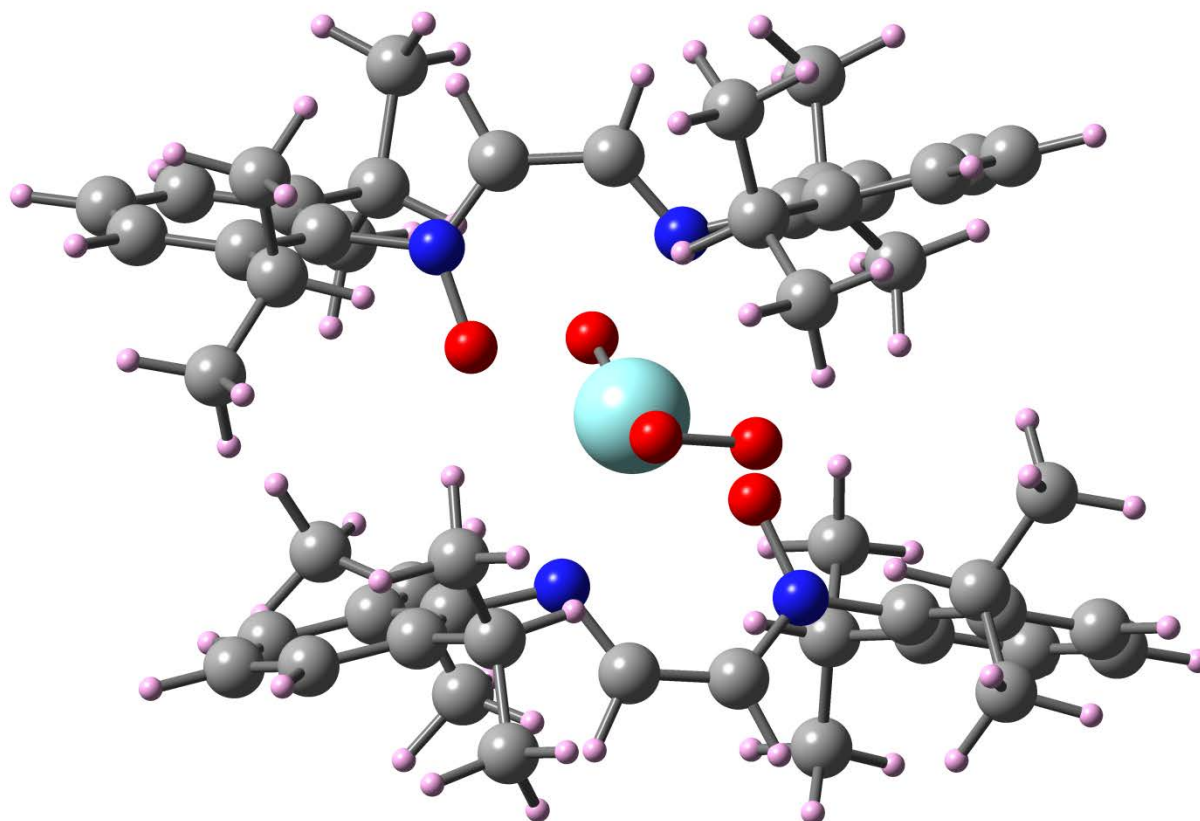

Fig. S81: NCCNO Oxo Complex with adsorbed O<sub>2</sub> molecule (planar conformation 1 lower energy)

| SCF          | E <sub>ZP</sub> | H            | G            |
|--------------|-----------------|--------------|--------------|
| -2666.253675 | -2665.102355    | -2665.031790 | -2665.211288 |

|    |             |             |             |
|----|-------------|-------------|-------------|
| Zr | 0.12817901  | -0.00958600 | -0.11615801 |
| O  | -2.13617716 | 0.42261103  | 0.19699002  |
| O  | 2.03228016  | -0.86191507 | -0.57318304 |
| O  | -0.37834903 | 0.02124900  | -1.88229214 |
| N  | -0.12027901 | -2.05278516 | 0.91080407  |
| N  | 2.86339822  | -1.57302412 | 0.28815502  |
| N  | -0.02861900 | 2.44049219  | -0.41808003 |
| N  | -2.84870722 | 1.24345810  | -0.57952305 |
| C  | 0.97003607  | -2.69325221 | 1.42408911  |
| C  | 2.32805418  | -2.45910719 | 1.17694609  |
| C  | -1.12673808 | 3.03905523  | -0.78322506 |
| C  | -2.42753419 | 2.43148419  | -0.98455207 |
| C  | -1.39716711 | -2.64885420 | 1.28624910  |
| C  | -1.90101315 | -2.48722019 | 2.60802920  |
| C  | -3.12360124 | -3.11260824 | 2.93986823  |

|   |             |             |             |
|---|-------------|-------------|-------------|
| C | -3.83204429 | -3.87134330 | 1.99919515  |
| C | -3.32063526 | -4.02151731 | 0.69951406  |
| C | -2.10103016 | -3.42599026 | 0.31890602  |
| C | -2.05043415 | -0.50414004 | 4.20612132  |
| C | -1.17447609 | -1.67125513 | 3.68480628  |
| C | -0.71027205 | -2.57172520 | 4.86054037  |
| C | 5.02636938  | 1.53900612  | 1.88433314  |
| C | 4.64475835  | 0.04085100  | 1.99182015  |
| C | 5.17694240  | -0.56843105 | 3.31652525  |
| C | 4.27810733  | -1.52796712 | -0.03198600 |
| C | 5.14356639  | -0.75636506 | 0.78386606  |
| C | 6.51551351  | -0.74933206 | 0.45018303  |
| C | 6.99513055  | -1.46324711 | -0.65843405 |
| C | 6.11107746  | -2.20662117 | -1.45767011 |
| C | 4.73374336  | -2.25817617 | -1.16121809 |
| C | -2.59218920 | -3.99319031 | -2.14427316 |
| C | -1.51975612 | -3.66424328 | -1.08028508 |
| C | -0.46417804 | -4.80595137 | -1.04984208 |
| C | 3.74225429  | -2.53543319 | -3.48580326 |
| C | 3.79090229  | -3.08816023 | -2.03784215 |
| C | 4.18689332  | -4.58799135 | -2.02733616 |
| C | 1.16902909  | 3.27870025  | -0.31272102 |
| C | 2.09644316  | 3.25886025  | -1.39035111 |
| C | 3.23935425  | 4.07813131  | -1.28012510 |
| C | 3.45603127  | 4.88083937  | -0.15026601 |
| C | 2.52281819  | 4.88095937  | 0.89656007  |
| C | 1.36092411  | 4.08265731  | 0.84449306  |
| C | 3.08795324  | 1.61783812  | -3.08831123 |
| C | 1.85524414  | 2.45885519  | -2.67684720 |
| C | 1.43096111  | 3.41434226  | -3.82627429 |
| C | -5.44317243 | 0.15688501  | 2.49171319  |
| C | -4.96759338 | 1.21573409  | 1.46595011  |
| C | -5.66097041 | 2.58271620  | 1.71819513  |
| C | -4.19543932 | 0.78243306  | -0.97135207 |
| C | -5.20218140 | 0.75480006  | 0.02366100  |
| C | -6.48505650 | 0.33416603  | -0.38308903 |
| C | -6.73464051 | -0.04400900 | -1.71140713 |
| C | -5.70665444 | -0.00821600 | -2.66600920 |
| C | -4.40036833 | 0.40448903  | -2.32480518 |
| C | 1.06440108  | 3.88003929  | 3.37447226  |
| C | 0.36738203  | 4.12361332  | 2.01242415  |
| C | -0.41545803 | 5.46500343  | 2.02746815  |
| C | -3.28698225 | -0.81358206 | -4.28773133 |
| C | -3.30094925 | 0.45265803  | -3.39689026 |
| C | -3.47052027 | 1.71005513  | -4.29598633 |
| H | 0.78121506  | -3.51668427 | 2.11424316  |
| H | 3.05738423  | -3.05469223 | 1.71270313  |
| H | -1.10643408 | 4.10746931  | -1.01520708 |
| H | -3.16265124 | 3.01652223  | -1.52162312 |
| H | -3.51992227 | -3.00181723 | 3.94689530  |
| H | -4.77154236 | -4.34609733 | 2.27384517  |
| H | -3.87395430 | -4.61482535 | -0.02171500 |

|   |             |             |             |
|---|-------------|-------------|-------------|
| H | -0.28640002 | -1.21453909 | 3.24187625  |
| H | 3.55245427  | -0.00415700 | 2.01727815  |
| H | -2.96330623 | -0.86809207 | 4.69713336  |
| H | -2.33813518 | 0.15693401  | 3.38104126  |
| H | -1.48581411 | 0.09201601  | 4.93476938  |
| H | -1.56412512 | -3.03709023 | 5.37141843  |
| H | -0.15936401 | -1.97561415 | 5.60048741  |
| H | -0.05119700 | -3.37856326 | 4.51369235  |
| H | 6.11525944  | 1.68489413  | 1.89844815  |
| H | 4.59971035  | 2.09226116  | 2.73065321  |
| H | 4.63099135  | 1.98172615  | 0.96290407  |
| H | 4.87395437  | -1.61812212 | 3.42642526  |
| H | 4.78157037  | -0.00938300 | 4.17473632  |
| H | 6.27386149  | -0.52912604 | 3.36265326  |
| H | 7.20860256  | -0.17289901 | 1.05755408  |
| H | 8.05522260  | -1.43965911 | -0.90105507 |
| H | 6.49421851  | -2.75469721 | -2.31487618 |
| H | -1.00782308 | -2.74706621 | -1.39702911 |
| H | 2.77681721  | -3.00604223 | -1.63553712 |
| H | -3.01872723 | -4.99500238 | -1.99678015 |
| H | -2.13776116 | -3.97594430 | -3.14319324 |
| H | -3.41449926 | -3.26788825 | -2.12688216 |
| H | -0.92700307 | -5.75004343 | -0.72987506 |
| H | 0.35905903  | -4.57840235 | -0.36471603 |
| H | -0.03875100 | -4.95580238 | -2.05177016 |
| H | 3.40499426  | -1.49351112 | -3.48852427 |
| H | 3.03887823  | -3.12301624 | -4.09067631 |
| H | 4.72739536  | -2.58482920 | -3.96962030 |
| H | 5.18463240  | -4.74599536 | -2.45815619 |
| H | 3.47013326  | -5.17179540 | -2.61997820 |
| H | 4.19393432  | -4.99181138 | -1.00657408 |
| H | 3.96184730  | 4.08953431  | -2.09166416 |
| H | 4.34510233  | 5.50384842  | -0.08705801 |
| H | 2.69921520  | 5.50332544  | 1.76983013  |
| H | 1.03433008  | 1.75147713  | -2.51892219 |
| H | -3.89274729 | 1.34840110  | 1.62566112  |
| H | 3.96002630  | 2.24364817  | -3.32170126 |
| H | 2.84849622  | 1.03164108  | -3.98522731 |
| H | 3.36201625  | 0.91687807  | -2.29230417 |
| H | 0.52548004  | 3.98062130  | -3.56678927 |
| H | 1.22139209  | 2.83825122  | -4.73704936 |
| H | 2.22368917  | 4.13984732  | -4.05530931 |
| H | -6.52703152 | -0.00760400 | 2.43181519  |
| H | -5.21409840 | 0.49570104  | 3.51003127  |
| H | -4.93754238 | -0.80092806 | 2.32918618  |
| H | -5.30490741 | 3.35163326  | 1.01949308  |
| H | -5.45410142 | 2.92871922  | 2.73917921  |
| H | -6.74980954 | 2.50269619  | 1.60215012  |
| H | -7.29108055 | 0.30343602  | 0.34438603  |
| H | -7.73090061 | -0.36781203 | -2.00295215 |
| H | -5.91453447 | -0.31293002 | -3.68719428 |
| H | -0.35263503 | 3.30840525  | 1.89093315  |

|   |             |             |             |
|---|-------------|-------------|-------------|
| H | -2.31649118 | 0.48935604  | -2.91316922 |
| H | 1.77545413  | 4.68018936  | 3.61991327  |
| H | 1.59737312  | 2.92430622  | 3.36017926  |
| H | 0.31452702  | 3.84313729  | 4.17573232  |
| H | -1.14071409 | 5.47411242  | 2.85216622  |
| H | -0.96317507 | 5.62918744  | 1.08897509  |
| H | 0.26361302  | 6.31680247  | 2.16572617  |
| H | -3.19554924 | -1.72054613 | -3.68438528 |
| H | -2.41964719 | -0.77050906 | -4.95797338 |
| H | -4.18740832 | -0.89771707 | -4.91174138 |
| H | -3.44305026 | 2.64608720  | -3.72257729 |
| H | -4.42634734 | 1.68276913  | -4.83717337 |
| H | -2.66100220 | 1.74847713  | -5.03584339 |
| O | 1.41340011  | 0.93149207  | 1.60905312  |
| O | 0.11292001  | 0.86355707  | 2.10290216  |

**Oxo Complex with adsorbed O<sub>2</sub> molecule (planar conformation 2 higher energy)**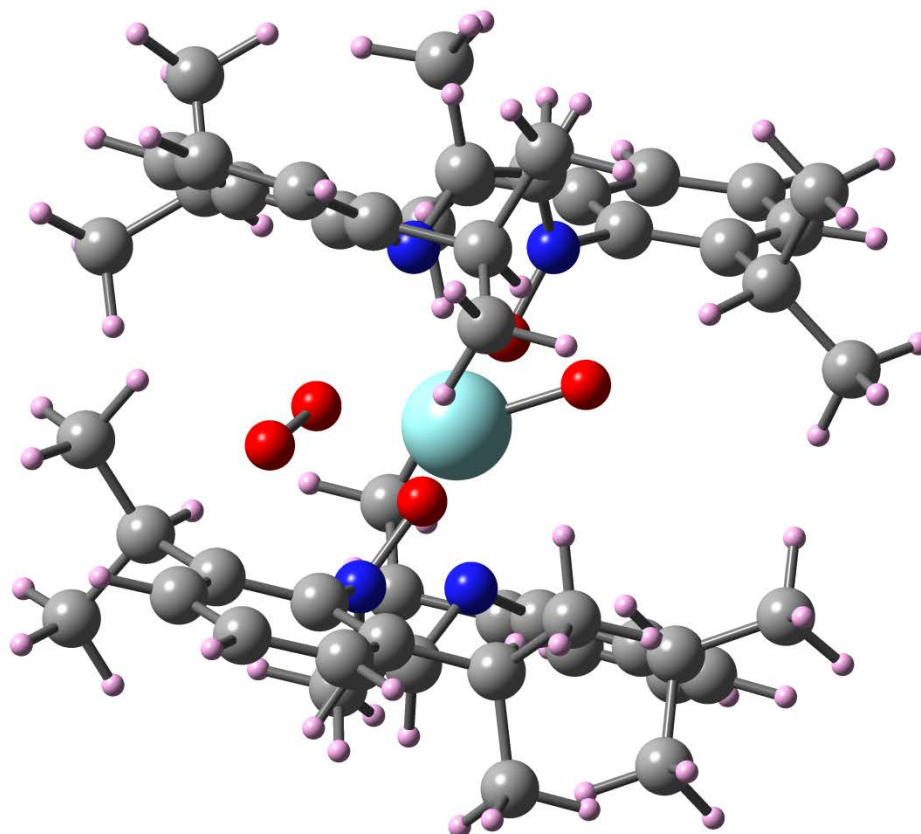

Fig. S82: NCCNO Oxo Complex with adsorbed O<sub>2</sub> molecule (planar conformation 2 higher energy)

| SCF          | E <sub>ZP</sub> | H            | G            |
|--------------|-----------------|--------------|--------------|
| -2666.252034 | -2665.101731    | -2665.031389 | -2665.212183 |

|    |             |             |             |
|----|-------------|-------------|-------------|
| Zr | -0.02547100 | -0.09727000 | -0.00349500 |
| O  | 2.27616800  | 0.41697600  | -0.20090200 |
| O  | -2.08002500 | -0.58861700 | 0.32359600  |
| O  | 0.54179400  | -0.47911600 | 1.70347100  |
| N  | -0.09781000 | -2.07882500 | -1.09438400 |
| N  | -2.96595000 | -1.11312000 | -0.61741100 |
| N  | 0.12127900  | 2.22240100  | 0.76418200  |
| N  | 2.98664600  | 1.09931300  | 0.68853700  |
| C  | -1.23067600 | -2.49557300 | -1.72537500 |
| C  | -2.53442200 | -2.01920800 | -1.54657700 |
| C  | 1.19077100  | 2.69846600  | 1.34224300  |
| C  | 2.50923700  | 2.10525800  | 1.40972700  |
| C  | 1.06045400  | -2.95480700 | -1.20706900 |
| C  | 1.95227300  | -2.82760000 | -2.30629400 |
| C  | 3.07168400  | -3.68735400 | -2.35979100 |

|   |             |             |             |
|---|-------------|-------------|-------------|
| C | 3.30122100  | -4.64482100 | -1.36203100 |
| C | 2.39879400  | -4.76941000 | -0.29215100 |
| C | 1.26504900  | -3.93785800 | -0.19412000 |
| C | 2.91684700  | -0.85462600 | -3.60373300 |
| C | 1.71931100  | -1.82262000 | -3.43883900 |
| C | 1.40914900  | -2.54943100 | -4.77448900 |
| C | -4.76401500 | 2.45014300  | -1.91452400 |
| C | -4.43628800 | 0.94797300  | -2.09874700 |
| C | -4.85265300 | 0.46770400  | -3.51536400 |
| C | -4.37418200 | -0.91703700 | -0.31626900 |
| C | -5.09237700 | 0.07680800  | -1.02546700 |
| C | -6.46669700 | 0.21846800  | -0.73489300 |
| C | -7.08826800 | -0.58345600 | 0.23414500  |
| C | -6.34750100 | -1.55061600 | 0.93261400  |
| C | -4.97453100 | -1.74012800 | 0.67317800  |
| C | 0.88354700  | -4.43790600 | 2.30494300  |
| C | 0.24311600  | -4.14514800 | 0.92937800  |
| C | -0.74322600 | -5.28311700 | 0.54436500  |
| C | -4.31611800 | -2.68125100 | 2.95522900  |
| C | -4.19789000 | -2.83134100 | 1.41738100  |
| C | -4.67149600 | -4.23964800 | 0.96576400  |
| C | -1.05536300 | 3.09821100  | 0.79872000  |
| C | -1.97121000 | 2.96049900  | 1.87613500  |
| C | -3.06603600 | 3.84972700  | 1.91339500  |
| C | -3.24382300 | 4.82924800  | 0.92453200  |
| C | -2.32711100 | 4.93360100  | -0.13220100 |
| C | -1.21466100 | 4.07105400  | -0.22395700 |
| C | -3.05868500 | 1.15569700  | 3.32991600  |
| C | -1.76686900 | 1.94346500  | 3.00600100  |
| C | -1.22403300 | 2.65117900  | 4.27819700  |
| C | 5.47710600  | 1.91581300  | -2.59937100 |
| C | 4.87412800  | 2.28038800  | -1.21956600 |
| C | 5.23864200  | 3.74141800  | -0.83648800 |
| C | 4.41386000  | 0.73784000  | 0.80877900  |
| C | 5.31717000  | 1.31014000  | -0.11862400 |
| C | 6.67876600  | 0.98020000  | 0.04082800  |
| C | 7.09709900  | 0.11890300  | 1.06822000  |
| C | 6.16403400  | -0.43768400 | 1.95656300  |
| C | 4.78652000  | -0.14703900 | 1.84673300  |
| C | -0.90781100 | 4.23990700  | -2.75921400 |
| C | -0.21396600 | 4.23708100  | -1.37437400 |
| C | 0.63305300  | 5.52464700  | -1.17935000 |
| C | 4.00564400  | -2.24951700 | 3.06308800  |
| C | 3.77471000  | -0.73606300 | 2.83676700  |
| C | 3.84051200  | 0.02249800  | 4.19169800  |
| H | -1.13868700 | -3.31707400 | -2.43794200 |
| H | -3.32443200 | -2.43813900 | -2.15818700 |
| H | 1.13362200  | 3.66865200  | 1.84445400  |
| H | 3.22991000  | 2.57744100  | 2.06517200  |
| H | 3.76622000  | -3.60560500 | -3.19290400 |
| H | 4.17097200  | -5.29577000 | -1.41979800 |
| H | 2.57648000  | -5.52445100 | 0.46935200  |

|   |             |             |             |
|---|-------------|-------------|-------------|
| H | 0.85146100  | -1.20728100 | -3.18601800 |
| H | -3.35007600 | 0.83875600  | -2.01960500 |
| H | 3.83276200  | -1.38813500 | -3.89435900 |
| H | 3.10443000  | -0.32278400 | -2.66486200 |
| H | 2.69499600  | -0.11039300 | -4.37988800 |
| H | 2.25824800  | -3.16496400 | -5.10168000 |
| H | 1.19744500  | -1.81697800 | -5.56507800 |
| H | 0.53645400  | -3.20907000 | -4.67870800 |
| H | -5.83186300 | 2.65797300  | -2.06654800 |
| H | -4.20186000 | 3.04416200  | -2.64638000 |
| H | -4.48475900 | 2.79715300  | -0.91357000 |
| H | -4.58630500 | -0.58482900 | -3.67680200 |
| H | -4.34298500 | 1.06549600  | -4.28195800 |
| H | -5.93652800 | 0.56944900  | -3.66547200 |
| H | -7.05008700 | 0.96532900  | -1.26656600 |
| H | -8.14774000 | -0.45614100 | 0.44510200  |
| H | -6.83992200 | -2.16505300 | 1.68196700  |
| H | -0.32926600 | -3.21849200 | 1.03770000  |
| H | -3.13668300 | -2.73452400 | 1.16916800  |
| H | 1.41983600  | -5.39677200 | 2.31898700  |
| H | 0.10105100  | -4.48679100 | 3.07385900  |
| H | 1.58017600  | -3.64239800 | 2.58363200  |
| H | -0.20857500 | -6.23482400 | 0.41842800  |
| H | -1.26556700 | -5.06197600 | -0.39446900 |
| H | -1.49885400 | -5.41812600 | 1.33062900  |
| H | -3.96343000 | -1.69655600 | 3.28051000  |
| H | -3.70491400 | -3.44479300 | 3.45427300  |
| H | -5.35166500 | -2.80720600 | 3.29850300  |
| H | -5.73205400 | -4.39665300 | 1.20357200  |
| H | -4.09051600 | -5.01903000 | 1.47604700  |
| H | -4.54450300 | -4.37553500 | -0.11579700 |
| H | -3.78261000 | 3.77568200  | 2.72682600  |
| H | -4.09339300 | 5.50608700  | 0.97623200  |
| H | -2.47627800 | 5.69134400  | -0.89696200 |
| H | -1.01961000 | 1.20445300  | 2.69735300  |
| H | 3.78494600  | 2.21971800  | -1.32640600 |
| H | -3.85536600 | 1.80425100  | 3.71866500  |
| H | -2.84314200 | 0.39916200  | 4.09588200  |
| H | -3.42767800 | 0.64128000  | 2.43649500  |
| H | -0.27342300 | 3.16630600  | 4.08238600  |
| H | -1.05072100 | 1.91546800  | 5.07429500  |
| H | -1.93732400 | 3.39880900  | 4.65150700  |
| H | 6.56886300  | 2.02827400  | -2.60965100 |
| H | 5.06856500  | 2.58135600  | -3.37054900 |
| H | 5.23496900  | 0.88471500  | -2.87781500 |
| H | 4.78425200  | 4.03598500  | 0.11858600  |
| H | 4.88606200  | 4.43647700  | -1.60943200 |
| H | 6.32575900  | 3.86213000  | -0.74125600 |
| H | 7.41309100  | 1.39564900  | -0.64321200 |
| H | 8.15222100  | -0.12185500 | 1.17366500  |
| H | 6.50503900  | -1.10958900 | 2.73828000  |
| H | 0.46610900  | 3.37943500  | -1.37606800 |



|   |             |             |             |
|---|-------------|-------------|-------------|
| H | 2.75581100  | -0.62420100 | 2.44176500  |
| H | -1.60984200 | 5.07781100  | -2.86660200 |
| H | -1.44605700 | 3.29930500  | -2.91536500 |
| H | -0.15395900 | 4.33148100  | -3.55233300 |
| H | 1.36701600  | 5.62427900  | -1.99018600 |
| H | 1.17723500  | 5.51338300  | -0.22467500 |
| H | -0.00246200 | 6.42021200  | -1.18658000 |
| H | 3.93305800  | -2.80621300 | 2.12142300  |
| H | 3.23982100  | -2.63513500 | 3.74637700  |
| H | 4.98467800  | -2.45760500 | 3.51521400  |
| H | 3.63749400  | 1.09495700  | 4.07123800  |
| H | 4.82901100  | -0.08191800 | 4.66029100  |
| H | 3.08846400  | -0.38257500 | 4.88002600  |
| O | 0.36451200  | 0.95542200  | -2.03847700 |
| O | -1.02875700 | 0.91170700  | -2.03129100 |

**Oxo Complex with adsorbed O<sub>2</sub> molecule (butterfly conformation)**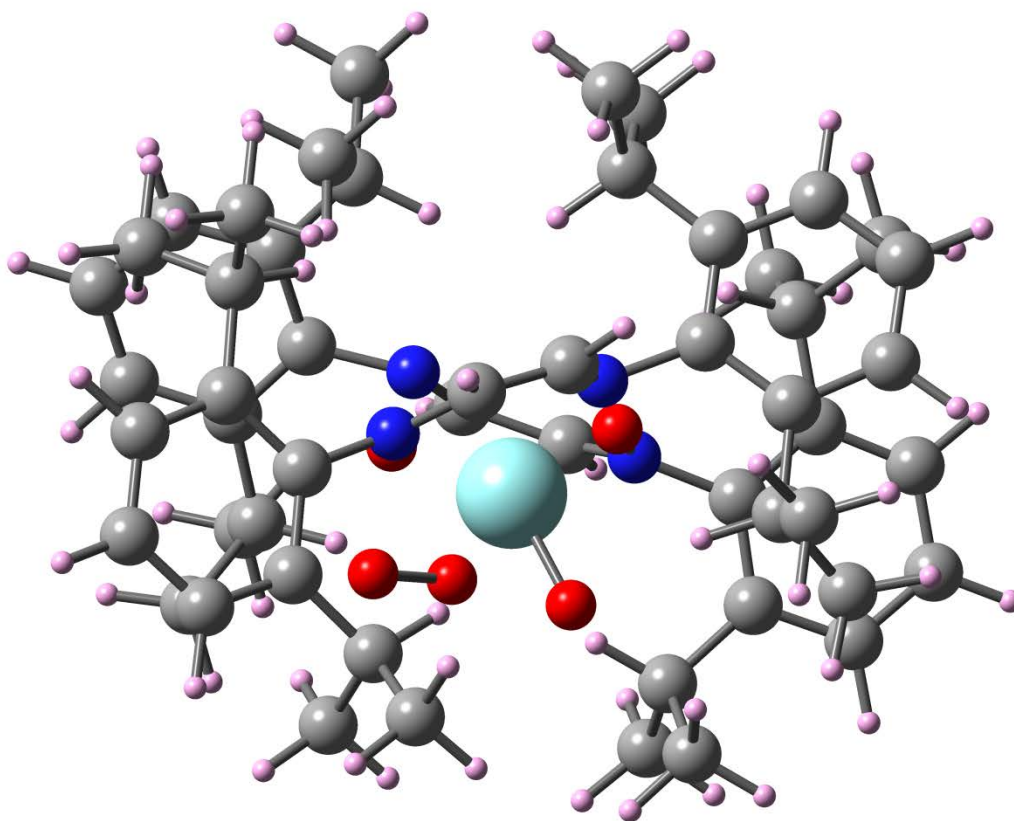Fig. S83: NCCNO Oxo Complex with adsorbed O<sub>2</sub> molecule (butterfly conformation)

| SCF          | E <sub>ZP</sub> | H            | G            |
|--------------|-----------------|--------------|--------------|
| -2666.250739 | -2665.100113    | -2665.029174 | -2665.211025 |

|   |             |             |             |
|---|-------------|-------------|-------------|
| O | -2.20063567 | -0.51455241 | -0.27804372 |
| O | -1.04167802 | 1.26125279  | -2.10362012 |
| N | -0.06256477 | -2.04500591 | 0.85484287  |
| N | -2.98343497 | -1.63449301 | -0.01848543 |
| N | 2.80781247  | 1.13260099  | -0.37397297 |
| N | 0.34841929  | 2.81268633  | 0.42786722  |
| C | -1.14370030 | -2.83496671 | 1.10789257  |
| C | -2.46796436 | -2.68518691 | 0.67417365  |
| C | 2.64978537  | 2.44400154  | -0.37201155 |
| C | 1.49225627  | 3.24908376  | -0.01850593 |
| C | 1.15807535  | -2.55831791 | 1.47834738  |
| C | 1.93092436  | -3.55134985 | 0.81076680  |
| C | 3.04670141  | -4.09513631 | 1.48457871  |
| C | 3.39003939  | -3.68604990 | 2.78068024  |
| C | 2.61858728  | -2.70648605 | 3.42428667  |
| C | 1.50084767  | -2.12532507 | 2.79022992  |

|   |             |             |             |
|---|-------------|-------------|-------------|
| C | 2.77020623  | -4.05394446 | -1.54958656 |
| C | 1.56527028  | -4.09118613 | -0.57650434 |
| C | 0.99753523  | -5.53300794 | -0.47379059 |
| C | -3.18984827 | -1.14457998 | -3.90888604 |
| C | -3.37910976 | -2.26276574 | -2.84944232 |
| C | -3.57450805 | -3.64192437 | -3.52939754 |
| C | -4.33556687 | -1.59626415 | -0.54068531 |
| C | -4.53638954 | -1.92129823 | -1.90775164 |
| C | -5.86087140 | -1.89681178 | -2.39288055 |
| C | -6.93476355 | -1.56300262 | -1.55243832 |
| C | -6.70433522 | -1.22963119 | -0.20857078 |
| C | -5.39750618 | -1.22690099 | 0.32332852  |
| C | 1.50351839  | 0.01145068  | 4.20008604  |
| C | 0.64940091  | -1.10480367 | 3.55129120  |
| C | -0.22325501 | -1.81237825 | 4.62377804  |
| C | -5.67743851 | 0.61675364  | 2.05052780  |
| C | -5.16758401 | -0.82293007 | 1.78222330  |
| C | -5.82370437 | -1.83283583 | 2.76029239  |
| C | 4.10422730  | 0.54847580  | -0.78681906 |
| C | 4.31259686  | 0.25180733  | -2.15509174 |
| C | 5.56046684  | -0.31708448 | -2.49504229 |
| C | 6.53615110  | -0.56769425 | -1.52111113 |
| C | 6.29332251  | -0.25021950 | -0.17427450 |
| C | 5.06651393  | 0.31262423  | 0.22849988  |
| C | 2.90535692  | -0.72009756 | -4.05625681 |
| C | 3.29639412  | 0.55244673  | -3.26132507 |
| C | 3.84343576  | 1.65354167  | -4.21093516 |
| C | -2.17593462 | 1.64068912  | 3.26253651  |
| C | -1.03455358 | 2.63901129  | 2.94365244  |
| C | -0.57627210 | 3.39440123  | 4.22021594  |
| C | -0.73893906 | 3.72382045  | 0.61574131  |
| C | -1.45358689 | 3.62172010  | 1.84852288  |
| C | -2.53888949 | 4.48622231  | 2.07513049  |
| C | -2.93510837 | 5.41999420  | 1.10533065  |
| C | -2.25324363 | 5.48253475  | -0.11788721 |
| C | -1.15199982 | 4.64861620  | -0.40276359 |
| C | 5.40593936  | -0.32445186 | 2.69126859  |
| C | 4.82769368  | 0.70416010  | 1.69107889  |
| C | 5.41786511  | 2.11402355  | 1.97935329  |
| C | -1.60440720 | 4.53327731  | -2.91347585 |
| C | -0.53460727 | 4.73714141  | -1.80805102 |
| C | 0.21059673  | 6.08421140  | -2.01289427 |
| H | -0.97309395 | -3.73505265 | 1.70074208  |
| H | -3.17491099 | -3.47754987 | 0.88987586  |
| H | 3.52043815  | 2.99071642  | -0.71712429 |
| H | 1.67356794  | 4.31956221  | -0.16592530 |
| H | 3.64193960  | -4.85893658 | 0.99018200  |
| H | 4.24323930  | -4.13135947 | 3.28800195  |
| H | 2.88235448  | -2.39887331 | 4.43358069  |
| H | 0.79402465  | -3.45272754 | -1.01353647 |
| H | -2.44837388 | -2.31158536 | -2.27709035 |
| H | 3.57403744  | -4.73694152 | -1.24079001 |

|   |             |             |             |
|---|-------------|-------------|-------------|
| H | 3.18692874  | -3.04206015 | -1.61556493 |
| H | 2.44377517  | -4.35108758 | -2.55464642 |
| H | 1.73843767  | -6.22667327 | -0.05190294 |
| H | 0.71656874  | -5.90025155 | -1.47004543 |
| H | 0.10401195  | -5.56755178 | 0.16321742  |
| H | -4.07403449 | -1.05256264 | -4.55534060 |
| H | -2.32069437 | -1.37496359 | -4.53709346 |
| H | -3.00696436 | -0.17743955 | -3.42753835 |
| H | -3.69865717 | -4.44145674 | -2.78704482 |
| H | -2.69457008 | -3.87850933 | -4.14100121 |
| H | -4.45346138 | -3.65233619 | -4.18830276 |
| H | -6.05097277 | -2.14142953 | -3.43460162 |
| H | -7.94879247 | -1.55519102 | -1.94599647 |
| H | -7.54309423 | -0.95984785 | 0.42853396  |
| H | -0.02865502 | -0.63121287 | 2.83283672  |
| H | -4.08922835 | -0.82639730 | 1.97493191  |
| H | 2.19400511  | -0.38821803 | 4.95400521  |
| H | 0.85727052  | 0.74167790  | 4.70283969  |
| H | 2.09460456  | 0.54150744  | 3.44316551  |
| H | 0.40582248  | -2.32003963 | 5.36740017  |
| H | -0.87787613 | -2.56450414 | 4.16685288  |
| H | -0.85521695 | -1.08578119 | 5.15316613  |
| H | -5.18876969 | 1.33615815  | 1.38266991  |
| H | -5.46206464 | 0.90819488  | 3.08718843  |
| H | -6.76202702 | 0.69377386  | 1.89906949  |
| H | -6.91331472 | -1.86438998 | 2.62853714  |
| H | -5.61841715 | -1.54667963 | 3.80050415  |
| H | -5.43841110 | -2.84865083 | 2.60347717  |
| H | 5.76172263  | -0.56442843 | -3.53331248 |
| H | 7.48722131  | -1.00920440 | -1.80878969 |
| H | 7.05896679  | -0.45029707 | 0.56875665  |
| H | 2.37406778  | 0.93608584  | -2.81854115 |
| H | -0.18202259 | 2.06149032  | 2.57173871  |
| H | 3.78104148  | -1.20391724 | -4.51007578 |
| H | 2.21305594  | -0.44782314 | -4.86301084 |
| H | 2.38478457  | -1.43890450 | -3.41593600 |
| H | 4.10011056  | 2.57252420  | -3.66584718 |
| H | 3.08433294  | 1.90421101  | -4.96216050 |
| H | 4.74430231  | 1.31547975  | -4.74000698 |
| H | -3.06570016 | 2.15679598  | 3.64655733  |
| H | -1.85103884 | 0.92129726  | 4.02556187  |
| H | -2.46648037 | 1.08391032  | 2.36386419  |
| H | 0.26109243  | 4.07065042  | 4.00376613  |
| H | -0.25202420 | 2.68458742  | 4.99196589  |
| H | -1.39198470 | 3.99597816  | 4.64223551  |
| H | -3.07723808 | 4.43030429  | 3.01765973  |
| H | -3.77515700 | 6.08373826  | 1.29491252  |
| H | -2.58999387 | 6.18433972  | -0.87600181 |
| H | 3.74571129  | 0.74326091  | 1.86317645  |
| H | 0.18359112  | 3.92387879  | -1.94384092 |
| H | 6.50366221  | -0.33785389 | 2.67261972  |
| H | 5.03810258  | -1.33302677 | 2.47946340  |

|    |             |             |             |
|----|-------------|-------------|-------------|
| H  | 5.09972930  | -0.05896609 | 3.71126308  |
| H  | 5.21947099  | 2.40350257  | 3.01956877  |
| H  | 4.98668885  | 2.88401897  | 1.32688935  |
| H  | 6.50516264  | 2.11656025  | 1.82678913  |
| H  | -2.09523782 | 3.56207007  | -2.79458241 |
| H  | -1.12329465 | 4.54971609  | -3.90056647 |
| H  | -2.36736298 | 5.32221024  | -2.90033250 |
| H  | 1.00443080  | 6.23527388  | -1.26785796 |
| H  | -0.47985692 | 6.93378690  | -1.92989518 |
| H  | 0.66634254  | 6.11847795  | -3.01137386 |
| O  | 0.14213561  | -1.58787614 | -2.12980096 |
| O  | 0.33554300  | 1.43684277  | -2.13393886 |
| O  | 1.87409802  | 0.25058376  | 0.04625223  |
| Zr | -0.13551694 | -0.38229613 | -0.81337624 |

## 6.5 Structures with six oxygen atoms

### Oxo Complex with adsorbed ozone group (conformation 1 lower energy)

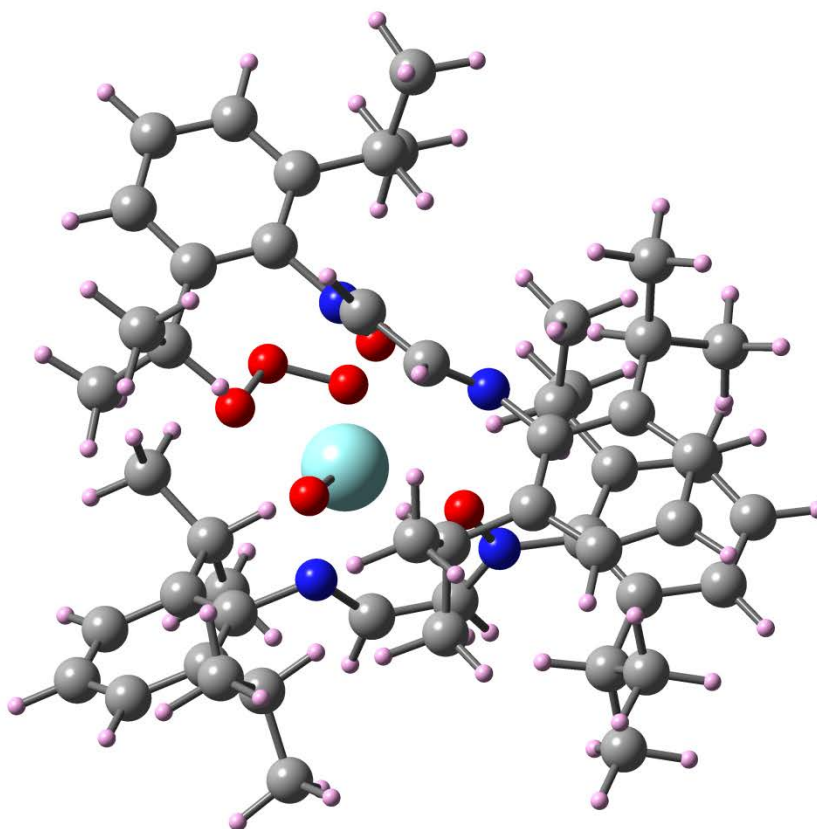

Fig. S84: NCCNO Oxo Complex with adsorbed ozone group (conformation 1 lower energy)

| SCF          | E <sub>ZP</sub> | H            | G            |
|--------------|-----------------|--------------|--------------|
| -2741.401498 | -2740.248894    | -2740.176349 | -2740.363029 |

|    |             |             |             |
|----|-------------|-------------|-------------|
| Zr | -0.92430599 | -0.27379342 | -0.00216095 |
| O  | 0.96576072  | -1.07123326 | -0.49614491 |
| O  | -0.47604832 | 1.87885245  | -0.42209627 |
| O  | -2.98618888 | 0.25844665  | -0.71480433 |
| N  | 1.92505319  | 2.07667089  | 1.30014126  |
| N  | -0.85230553 | 2.91897201  | 0.36979493  |
| N  | -1.50439609 | -2.48463861 | -0.20393193 |
| N  | 1.32659009  | -2.12843041 | -1.32802989 |
| C  | 1.05945958  | 2.76859907  | 1.97645475  |
| C  | -0.17217790 | 3.31536999  | 1.42506056  |
| C  | -0.75815745 | -3.39137370 | -0.88904294 |
| C  | 0.51762096  | -3.21975788 | -1.44544071 |
| C  | 3.12688207  | 1.60223748  | 1.88911303  |
| C  | 3.15734672  | 0.89742559  | 3.13482148  |

|   |             |             |             |
|---|-------------|-------------|-------------|
| C | 4.42033044  | 0.51914798  | 3.63674093  |
| C | 5.60541590  | 0.80219062  | 2.94118600  |
| C | 5.54963755  | 1.43611629  | 1.68732820  |
| C | 4.31965147  | 1.82801453  | 1.13078110  |
| C | 1.89021212  | -1.09940900 | 4.06686653  |
| C | 1.89660089  | 0.44096502  | 3.88433717  |
| C | 1.75496047  | 1.14853899  | 5.25814441  |
| C | -4.55195070 | 1.64680892  | 1.91441078  |
| C | -3.34719368 | 2.61966626  | 1.99359118  |
| C | -3.43749520 | 3.49413908  | 3.27361930  |
| C | -2.07577340 | 3.63067641  | -0.04447166 |
| C | -3.24987307 | 3.49652337  | 0.73860521  |
| C | -4.37990910 | 4.22482513  | 0.30776248  |
| C | -4.34055006 | 5.01739332  | -0.84839105 |
| C | -3.16367614 | 5.10432141  | -1.60877355 |
| C | -1.99844417 | 4.41090562  | -1.22493897 |
| C | 5.28010750  | 2.04216862  | -1.24334453 |
| C | 4.24649385  | 2.55372322  | -0.21410592 |
| C | 4.39065804  | 4.08851016  | -0.01353540 |
| C | -0.94220893 | 3.89146179  | -3.47090079 |
| C | -0.72716052 | 4.52873993  | -2.07245436 |
| C | -0.26167641 | 6.00313869  | -2.19660420 |
| C | -2.77162038 | -2.98990250 | 0.32309695  |
| C | -3.88334406 | -3.17810611 | -0.54956836 |
| C | -5.08154825 | -3.68718530 | -0.00508496 |
| C | -5.19007333 | -3.99923040 | 1.35734743  |
| C | -4.08621445 | -3.81056383 | 2.20099873  |
| C | -2.86281589 | -3.30945261 | 1.70789190  |
| C | -5.00705901 | -1.98456106 | -2.51482004 |
| C | -3.82699324 | -2.87752908 | -2.05254315 |
| C | -3.79854874 | -4.19181404 | -2.88133911 |
| C | 4.50685895  | -2.86002368 | 1.18733591  |
| C | 3.55104640  | -3.41058080 | 0.09839505  |
| C | 3.74255937  | -4.94095785 | -0.07742447 |
| C | 2.65277117  | -2.04846636 | -1.90810523 |
| C | 3.73151296  | -2.67685160 | -1.23377409 |
| C | 5.00397592  | -2.61234628 | -1.83917267 |
| C | 5.19302361  | -1.92954968 | -3.05131705 |
| C | 4.11233736  | -1.29254189 | -3.68123351 |
| C | 2.81719499  | -1.33666104 | -3.12338395 |
| C | -2.00984706 | -2.40241417 | 3.94223161  |
| C | -1.66670352 | -3.19843951 | 2.65960857  |
| C | -1.12050472 | -4.61109147 | 3.00507315  |
| C | 1.86983403  | 0.92200617  | -3.77190227 |
| C | 1.65945312  | -0.61469128 | -3.81647256 |
| C | 1.45921154  | -1.10763754 | -5.27233226 |
| H | 1.23377681  | 3.06999298  | 3.01688658  |
| H | -0.61480640 | 4.15329023  | 1.95343022  |
| H | -1.18480491 | -4.38386829 | -1.03727924 |
| H | 0.94006265  | -4.02928838 | -2.02837625 |
| H | 4.47427246  | -0.01836069 | 4.58021864  |
| H | 6.56496020  | 0.51038850  | 3.36172431  |

|   |             |             |             |
|---|-------------|-------------|-------------|
| H | 6.46930940  | 1.61952695  | 1.13962109  |
| H | 1.00595080  | 0.66670613  | 3.28903373  |
| H | -2.45538250 | 1.98901222  | 2.07127636  |
| H | 2.71497649  | -1.44334838 | 4.70508768  |
| H | 1.96870140  | -1.60358543 | 3.09638524  |
| H | 0.94655509  | -1.40919954 | 4.53128881  |
| H | 2.60124767  | 0.91206620  | 5.91715088  |
| H | 0.83469453  | 0.82030337  | 5.75849338  |
| H | 1.71583968  | 2.24177799  | 5.15456562  |
| H | -5.51234092 | 2.17988925  | 1.93590042  |
| H | -4.52818765 | 0.96431508  | 2.77333229  |
| H | -4.50398198 | 1.04687015  | 1.00006179  |
| H | -2.57147303 | 4.16232452  | 3.38230978  |
| H | -3.48194701 | 2.85222230  | 4.16261037  |
| H | -4.33899144 | 4.12130068  | 3.26313895  |
| H | -5.30290061 | 4.15200653  | 0.87552957  |
| H | -5.22871243 | 5.56076953  | -1.16180749 |
| H | -3.14814464 | 5.71596828  | -2.50669914 |
| H | 3.24293361  | 2.36927256  | -0.61681758 |
| H | 0.07802537  | 3.96464285  | -1.59080776 |
| H | 6.31055363  | 2.28424387  | -0.94966286 |
| H | 5.09950171  | 2.51737110  | -2.21672701 |
| H | 5.20580762  | 0.95630226  | -1.37808395 |
| H | 5.37510066  | 4.33664766  | 0.40628148  |
| H | 3.62433581  | 4.47611869  | 0.66973895  |
| H | 4.28767519  | 4.61243855  | -0.97350693 |
| H | -1.21613754 | 2.83492261  | -3.37890626 |
| H | -0.01850893 | 3.95938363  | -4.06070614 |
| H | -1.73646438 | 4.40742545  | -4.02662975 |
| H | -1.00094733 | 6.61812537  | -2.72574231 |
| H | 0.67821874  | 6.05328109  | -2.76180241 |
| H | -0.09202089 | 6.45584184  | -1.21080474 |
| H | -5.93921752 | -3.83581362 | -0.65648047 |
| H | -6.12385619 | -4.38896571 | 1.75645919  |
| H | -4.17020726 | -4.06453018 | 3.25466686  |
| H | -2.90295412 | -2.33124290 | -2.26498235 |
| H | 2.52820010  | -3.23985636 | 0.45125001  |
| H | -5.96762338 | -2.51125675 | -2.43654061 |
| H | -4.87078737 | -1.69744757 | -3.56595613 |
| H | -5.06402482 | -1.07061828 | -1.91514201 |
| H | -2.93849659 | -4.82087177 | -2.61755175 |
| H | -3.73905999 | -3.96571332 | -3.95460592 |
| H | -4.70831884 | -4.78228961 | -2.70861056 |
| H | 5.55894937  | -3.04064581 | 0.92995243  |
| H | 4.30905245  | -3.35780776 | 2.14594005  |
| H | 4.37196642  | -1.78175099 | 1.32850567  |
| H | 3.03766000  | -5.35300168 | -0.81101885 |
| H | 3.58032571  | -5.45763987 | 0.87766352  |
| H | 4.75892088  | -5.17623727 | -0.42027778 |
| H | 5.85189692  | -3.09084035 | -1.35581616 |
| H | 6.18243929  | -1.88955984 | -3.50123874 |
| H | 4.27403253  | -0.75893568 | -4.61422996 |



|   |             |             |             |
|---|-------------|-------------|-------------|
| H | -0.87139912 | -2.64679646 | 2.15131292  |
| H | 0.73261932  | -0.82266096 | -3.27362428 |
| H | -2.83707051 | -2.85746162 | 4.50286740  |
| H | -2.27324395 | -1.37194197 | 3.68213575  |
| H | -1.13672736 | -2.37129815 | 4.60800870  |
| H | -0.23268678 | -4.53072333 | 3.64738687  |
| H | -0.83857829 | -5.16204663 | 2.09784347  |
| H | -1.87204168 | -5.20838945 | 3.53923231  |
| H | 1.95489502  | 1.27177834  | -2.73617000 |
| H | 1.01378445  | 1.42967674  | -4.23263229 |
| H | 2.77855369  | 1.21669992  | -4.31482825 |
| H | 1.29275554  | -2.19209878 | -5.30706868 |
| H | 2.32902374  | -0.87910893 | -5.90252262 |
| H | 0.58479371  | -0.61464441 | -5.71585868 |
| O | -1.04220717 | 0.02342589  | 1.78802864  |
| O | -2.81359471 | 0.41293120  | -2.14804971 |
| O | -1.54828408 | -0.00044631 | -2.52057164 |

**Oxo Complex with adsorbed ozone group (conformation 2 higher energy)**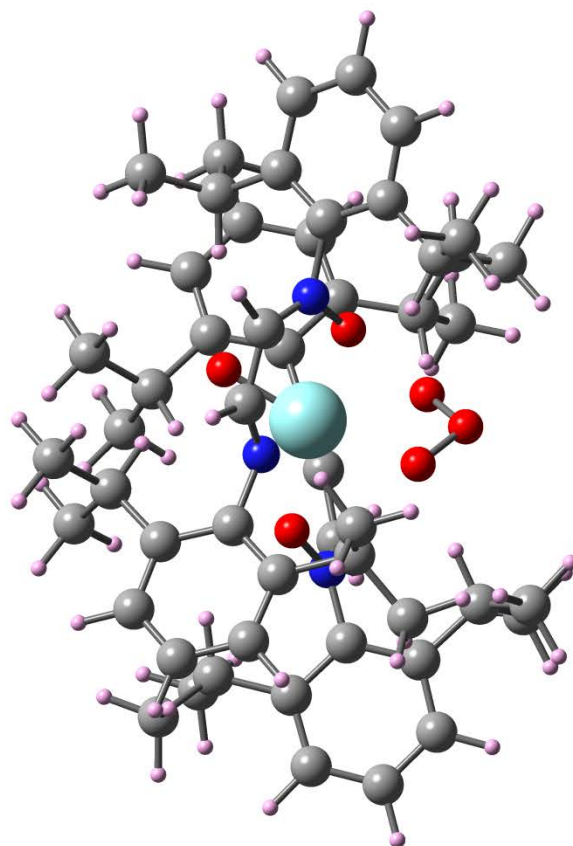

Fig. S85: NCCNO Oxo Complex with adsorbed ozone group (conformation 2 higher energy)

| SCF          | $E_{ZP}$     | H            | G            |
|--------------|--------------|--------------|--------------|
| -2741.400069 | -2740.246462 | -2740.174369 | -2740.357974 |

|    |             |             |             |
|----|-------------|-------------|-------------|
| Zr | 0.19522683  | 0.20019623  | -0.10870643 |
| O  | -1.92270800 | 0.43160638  | 0.06023605  |
| O  | 2.07967897  | -1.00769042 | -0.60514023 |
| O  | 0.69111321  | 0.52791908  | -2.38867339 |
| N  | -0.17885257 | -1.99192029 | 1.08939925  |
| N  | 2.78309394  | -1.75071581 | 0.25019946  |
| N  | 0.00740111  | 2.47885832  | -0.41247182 |
| N  | -2.73746791 | 1.21864390  | -0.76648002 |
| C  | 0.84918470  | -2.65867074 | 1.54000635  |
| C  | 2.25300392  | -2.47486374 | 1.22107534  |
| C  | -1.10781893 | 3.07528547  | -0.89899682 |
| C  | -2.35725301 | 2.48012063  | -1.11904862 |
| C  | -1.47294119 | -2.42961134 | 1.63217083  |
| C  | -1.87200710 | -1.95457654 | 2.91050936  |
| C  | -3.08889264 | -2.44218629 | 3.43414201  |
| C  | -3.87972632 | -3.35311096 | 2.71991794  |

|   |             |             |             |
|---|-------------|-------------|-------------|
| C | -3.46242860 | -3.79943389 | 1.45672637  |
| C | -2.25300563 | -3.35236360 | 0.88656950  |
| C | -1.86674846 | 0.24242830  | 4.21065886  |
| C | -1.03155981 | -0.97498737 | 3.74036118  |
| C | -0.39294524 | -1.69385491 | 4.96007854  |
| C | 4.87468973  | 1.57259396  | 1.48569427  |
| C | 4.43499370  | 0.11828335  | 1.79392965  |
| C | 4.82645250  | -0.27814704 | 3.24241252  |
| C | 4.23947742  | -1.75847388 | 0.02065933  |
| C | 5.02910296  | -0.86418186 | 0.77900329  |
| C | 6.42148919  | -0.90781562 | 0.54779732  |
| C | 6.97035278  | -1.77796647 | -0.40649262 |
| C | 6.14183055  | -2.62221381 | -1.16520603 |
| C | 4.74516725  | -2.63108335 | -0.97299707 |
| C | -2.91919976 | -4.06896736 | -1.48545019 |
| C | -1.77619255 | -3.91921853 | -0.45367964 |
| C | -1.06396637 | -5.28471653 | -0.24202897 |
| C | 3.65182386  | -2.81519142 | -3.24131179 |
| C | 3.83626226  | -3.49277568 | -1.85475187 |
| C | 4.35210900  | -4.94455089 | -2.00675626 |
| C | 1.11777417  | 3.38122729  | -0.11006551 |
| C | 2.00501321  | 3.80092650  | -1.14227738 |
| C | 3.05991148  | 4.67772886  | -0.80283793 |
| C | 3.22988019  | 5.14298009  | 0.50739136  |
| C | 2.33207222  | 4.73821905  | 1.50719019  |
| C | 1.26766594  | 3.85787483  | 1.22496166  |
| C | 3.11165527  | 2.65083723  | -3.13446806 |
| C | 1.84826760  | 3.37733386  | -2.60686965 |
| C | 1.50317485  | 4.59614243  | -3.50432957 |
| C | -5.48424801 | 0.43694155  | 2.42490743  |
| C | -4.79890787 | 1.23677210  | 1.29235314  |
| C | -5.26012876 | 2.72147339  | 1.32730423  |
| C | -4.03820837 | 0.67061910  | -1.10165889 |
| C | -5.04386583 | 0.64300852  | -0.09827342 |
| C | -6.30423668 | 0.12219324  | -0.45157596 |
| C | -6.55458944 | -0.34443365 | -1.75314455 |
| C | -5.54705744 | -0.29645540 | -2.72733659 |
| C | -4.26240694 | 0.20620368  | -2.42426487 |
| C | 0.98172964  | 3.01791442  | 3.62408068  |
| C | 0.27478212  | 3.50461736  | 2.33655008  |
| C | -0.65808563 | 4.71112748  | 2.63166810  |
| C | -3.01530119 | -1.07690036 | -4.25831456 |
| C | -3.19316928 | 0.27286205  | -3.52045094 |
| C | -3.52107910 | 1.40471636  | -4.53294563 |
| H | 0.68589568  | -3.46117583 | 2.26491617  |
| H | 2.96694063  | -3.04071794 | 1.80757271  |
| H | -1.05413798 | 4.13670315  | -1.14516639 |
| H | -3.13003234 | 3.06093837  | -1.60803538 |
| H | -3.41749274 | -2.10234243 | 4.41293763  |
| H | -4.81288851 | -3.71527199 | 3.14510424  |
| H | -4.07925151 | -4.50581758 | 0.90877444  |
| H | -0.22232531 | -0.57447799 | 3.12081926  |

|   |             |             |             |
|---|-------------|-------------|-------------|
| H | 3.34035692  | 0.10825154  | 1.72692291  |
| H | -2.68176627 | -0.05143331 | 4.88577106  |
| H | -2.30206666 | 0.76814092  | 3.35310692  |
| H | -1.22260017 | 0.94764379  | 4.75031614  |
| H | -1.16183890 | -2.09157773 | 5.63634260  |
| H | 0.23109555  | -0.99256085 | 5.52953590  |
| H | 0.24141888  | -2.53536409 | 4.64901946  |
| H | 5.95895472  | 1.70817266  | 1.60056641  |
| H | 4.37084105  | 2.26332227  | 2.17164001  |
| H | 4.59623922  | 1.86385472  | 0.46639423  |
| H | 4.48284650  | -1.29109476 | 3.49382803  |
| H | 4.36900503  | 0.41942392  | 3.95509587  |
| H | 5.91505158  | -0.24768064 | 3.38763654  |
| H | 7.07355960  | -0.24522627 | 1.10968911  |
| H | 8.04535096  | -1.79062775 | -0.56984541 |
| H | 6.58252105  | -3.27417352 | -1.91372556 |
| H | -1.04853021 | -3.22651947 | -0.88577003 |
| H | 2.84119017  | -3.54617986 | -1.39601477 |
| H | -3.62674956 | -4.86047762 | -1.20402017 |
| H | -2.50043136 | -4.33463766 | -2.46459743 |
| H | -3.47760650 | -3.13244727 | -1.59511831 |
| H | -1.75148243 | -6.02113294 | 0.19573069  |
| H | -0.20096715 | -5.19372232 | 0.43136246  |
| H | -0.70497892 | -5.67990511 | -1.20174076 |
| H | 3.21953105  | -1.81507507 | -3.13113533 |
| H | 2.97575360  | -3.41228011 | -3.86672070 |
| H | 4.61358873  | -2.72549535 | -3.76400452 |
| H | 5.30305598  | -4.98333233 | -2.55308262 |
| H | 3.62532124  | -5.53949370 | -2.57429283 |
| H | 4.50238403  | -5.42610847 | -1.03167679 |
| H | 3.74761839  | 5.00344006  | -1.57979173 |
| H | 4.04615666  | 5.82121009  | 0.74644019  |
| H | 2.45495107  | 5.11664336  | 2.51904643  |
| H | 1.02517029  | 2.66422831  | -2.68314178 |
| H | -3.72077032 | 1.21325518  | 1.48073115  |
| H | 3.99606018  | 3.30275101  | -3.11520230 |
| H | 2.95220374  | 2.32524795  | -4.17086471 |
| H | 3.32449257  | 1.75859399  | -2.53469855 |
| H | 0.58617336  | 5.09658811  | -3.16519467 |
| H | 1.35072578  | 4.27116612  | -4.54249028 |
| H | 2.31043467  | 5.34088845  | -3.49923555 |
| H | -6.57924587 | 0.49928343  | 2.36668189  |
| H | -5.18635572 | 0.84661289  | 3.39900285  |
| H | -5.19287181 | -0.61877919 | 2.39632065  |
| H | -4.73976288 | 3.32235480  | 0.57164512  |
| H | -5.05063012 | 3.16141978  | 2.31148092  |
| H | -6.33996911 | 2.80039308  | 1.14112068  |
| H | -7.09603751 | 0.08483860  | 0.29069451  |
| H | -7.53518245 | -0.74103016 | -2.00678871 |
| H | -5.75494721 | -0.65826939 | -3.73063671 |
| H | -0.34335824 | 2.67429758  | 1.98674148  |
| H | -2.23135563 | 0.51158077  | -3.05707864 |

|   |             |             |             |
|---|-------------|-------------|-------------|
| H | 1.64442543  | 3.78303272  | 4.05088693  |
| H | 1.56242977  | 2.11667315  | 3.40138451  |
| H | 0.23443091  | 2.76785468  | 4.38983618  |
| H | -1.39556396 | 4.44456439  | 3.40135869  |
| H | -1.20265057 | 5.02392283  | 1.73090954  |
| H | -0.08620625 | 5.57594443  | 2.99513981  |
| H | -2.74722369 | -1.87349168 | -3.55752428 |
| H | -2.20420043 | -0.99170675 | -4.99257420 |
| H | -3.92520405 | -1.37359360 | -4.79695385 |
| H | -3.60759457 | 2.37920696  | -4.03555507 |
| H | -4.46829945 | 1.20763287  | -5.05292548 |
| H | -2.72726956 | 1.47840774  | -5.28750678 |
| O | 1.07225094  | 0.48064323  | 1.47594108  |
| O | 0.26731466  | -0.71863861 | -2.94558124 |
| O | -0.35840013 | -1.48249658 | -1.95942999 |

Peroxo Complex with adsorbed O<sub>2</sub> molecule (spiro conformation)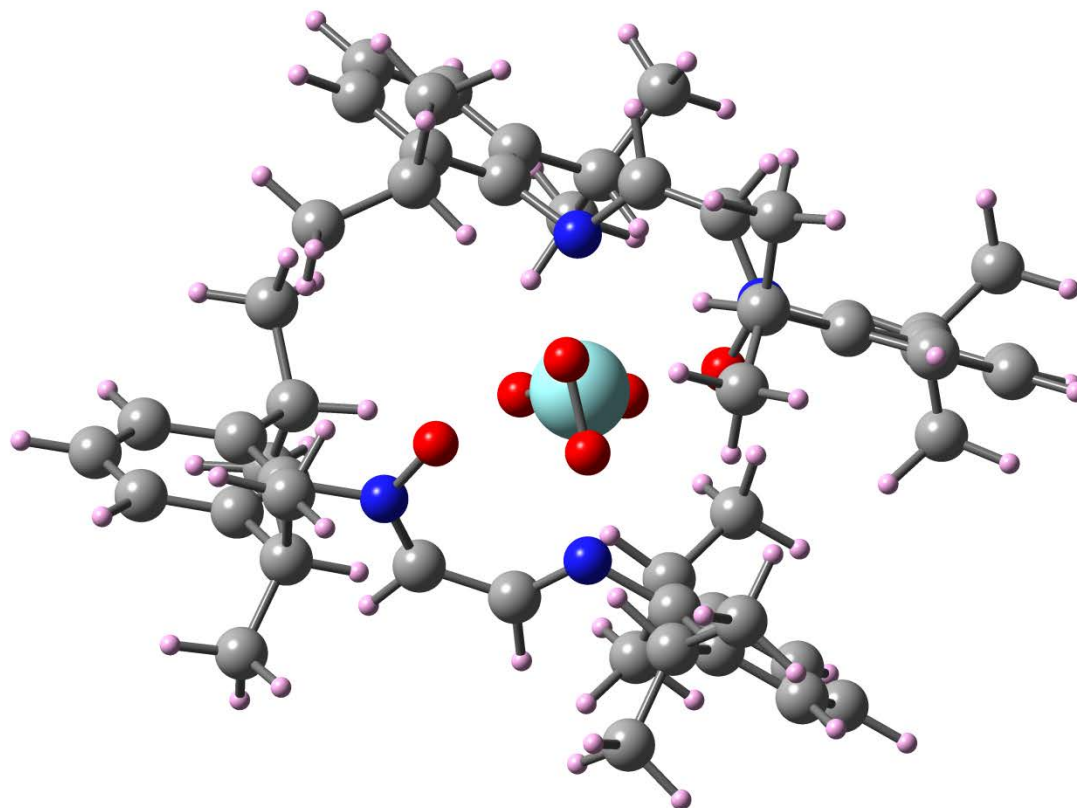Fig. S86: NCCNO Peroxo Complex with adsorbed O<sub>2</sub> molecule (spiro conformation)

| SCF          | E <sub>ZP</sub> | H            | G            |
|--------------|-----------------|--------------|--------------|
| -2741.415563 | -2740.261585    | -2740.189919 | -2740.370951 |

|    |             |             |             |
|----|-------------|-------------|-------------|
| Zr | 0.00345304  | -0.10956504 | 0.07215292  |
| O  | 2.10935021  | -0.51629803 | 0.17886493  |
| O  | -1.88289911 | 0.64354198  | -0.92767916 |
| O  | 0.28417808  | -0.85251609 | -2.09759325 |
| O  | 0.62524008  | 0.48976402  | -2.05721724 |
| N  | 0.11796401  | 2.40515915  | 0.37787895  |
| N  | -2.73789719 | 1.56102904  | -0.43022312 |
| N  | -0.14702093 | -2.34634921 | 0.33673394  |
| N  | 2.76414428  | -1.61242410 | -0.37536011 |
| C  | -1.00420509 | 3.03243818  | 0.61072796  |
| C  | -2.35221519 | 2.60806413  | 0.27380394  |
| C  | 0.88787817  | -3.18138326 | 0.04875192  |
| C  | 2.19834326  | -2.85479821 | -0.32088011 |
| C  | 1.33996209  | 3.10631123  | 0.76669398  |
| C  | 1.60110710  | 3.39554326  | 2.14027108  |
| C  | 2.80078918  | 4.07625033  | 2.44177610  |

|   |             |             |             |
|---|-------------|-------------|-------------|
| C | 3.70109024  | 4.46522938  | 1.44103403  |
| C | 3.41100023  | 4.18541335  | 0.09780292  |
| C | 2.23184015  | 3.50670128  | -0.26734410 |
| C | 1.40895411  | 2.15187716  | 4.35980425  |
| C | 0.67292504  | 3.01390621  | 3.30273117  |
| C | 0.06141397  | 4.28016030  | 3.96263022  |
| C | -5.05088333 | -0.83979619 | 2.09912008  |
| C | -4.59952132 | 0.57340293  | 1.65448904  |
| C | -5.14439638 | 1.64950400  | 2.63340112  |
| C | -4.15078230 | 1.35809500  | -0.78136114 |
| C | -5.03540936 | 0.88242594  | 0.21708093  |
| C | -6.38210644 | 0.70724991  | -0.16997810 |
| C | -6.80232652 | 0.97439192  | -1.48172320 |
| C | -5.88711843 | 1.42916697  | -2.44519927 |
| C | -4.53174033 | 1.63538201  | -2.11777125 |
| C | 3.07427523  | 2.74999124  | -2.56372428 |
| C | 1.89296712  | 3.32579526  | -1.74875722 |
| C | 1.40871807  | 4.67240335  | -2.35522826 |
| C | -3.29559123 | 1.03198399  | -4.25012141 |
| C | -3.54620526 | 2.12964107  | -3.18206433 |
| C | -4.02645833 | 3.44884616  | -3.83996138 |
| C | -1.35815701 | -3.01963828 | 0.80004498  |
| C | -2.31734007 | -3.46647934 | -0.15279610 |
| C | -3.44281914 | -4.17925341 | 0.31530794  |
| C | -3.61872015 | -4.44306343 | 1.68172504  |
| C | -2.66696209 | -3.98705338 | 2.60674712  |
| C | -1.52595402 | -3.26892131 | 2.19139408  |
| C | -3.39525517 | -2.62723129 | -2.31792026 |
| C | -2.13861007 | -3.24857132 | -1.65958821 |
| C | -1.75455901 | -4.57669441 | -2.36723626 |
| C | 4.90566741  | 0.53906510  | 2.17289908  |
| C | 4.74430242  | -0.92262402 | 1.68173304  |
| C | 5.59383348  | -1.89627007 | 2.53995211  |
| C | 4.13384038  | -1.38783706 | -0.79322614 |
| C | 5.09324545  | -1.03913202 | 0.19503193  |
| C | 6.41773155  | -0.81468397 | -0.23259010 |
| C | 6.77611256  | -0.94940898 | -1.58338520 |
| C | 5.81080652  | -1.30844303 | -2.53598328 |
| C | 4.46534541  | -1.52579407 | -2.16843725 |
| C | -1.14162201 | -2.01568121 | 4.38284225  |
| C | -0.49340394 | -2.82123925 | 3.23007816  |
| C | 0.29874114  | -4.03955933 | 3.77618421  |
| C | 3.42043532  | -0.89779704 | -4.41550842 |
| C | 3.44221634  | -1.91166211 | -3.24372633 |
| C | 3.71408339  | -3.34628222 | -3.77213737 |
| H | -0.98020110 | 4.01917926  | 1.08053900  |
| H | -3.15563726 | 3.26803916  | 0.57941096  |
| H | 0.69297917  | -4.25261734 | 0.11014692  |
| H | 2.86976033  | -3.66284326 | -0.58516713 |
| H | 3.03115520  | 4.29884935  | 3.48018718  |
| H | 4.61760430  | 4.98747743  | 1.70502105  |
| H | 4.10161527  | 4.50427339  | -0.67789813 |

|   |             |             |             |
|---|-------------|-------------|-------------|
| H | -0.13706301 | 2.38357015  | 2.92843614  |
| H | -3.50605224 | 0.58308095  | 1.71933805  |
| H | 2.25150816  | 2.68743522  | 4.81806428  |
| H | 1.77565615  | 1.22973310  | 3.89940021  |
| H | 0.71143706  | 1.87245412  | 5.16060131  |
| H | 0.83959702  | 4.91627536  | 4.40497125  |
| H | -0.63115408 | 3.99065726  | 4.76419928  |
| H | -0.49239108 | 4.89617833  | 3.23962416  |
| H | -6.14494444 | -0.92592621 | 2.14686108  |
| H | -4.65330430 | -1.05336519 | 3.09858515  |
| H | -4.67129829 | -1.61136124 | 1.42128603  |
| H | -4.80106737 | 2.65917709  | 2.36899910  |
| H | -4.80230235 | 1.43388299  | 3.65329119  |
| H | -6.24263447 | 1.66224399  | 2.63785812  |
| H | -7.10078952 | 0.34585387  | 0.55983496  |
| H | -7.84376359 | 0.82401889  | -1.75572622 |
| H | -6.22811845 | 1.62809598  | -3.45748535 |
| H | 1.06941908  | 2.61374919  | -1.83440023 |
| H | -2.57875119 | 2.32963310  | -2.70870229 |
| H | 3.92177128  | 3.44716430  | -2.60913128 |
| H | 2.75196421  | 2.55020321  | -3.59354636 |
| H | 3.42531127  | 1.80842117  | -2.12741225 |
| H | 2.19990111  | 5.43301143  | -2.31200626 |
| H | 0.53694299  | 5.06722137  | -1.81532522 |
| H | 1.12572205  | 4.53484034  | -3.40744734 |
| H | -2.88275218 | 0.12980993  | -3.78778037 |
| H | -2.57670818 | 1.39186203  | -4.99730947 |
| H | -4.22457629 | 0.76454695  | -4.77143145 |
| H | -4.95845640 | 3.30629513  | -4.40179642 |
| H | -3.26777827 | 3.81188220  | -4.54511943 |
| H | -4.20145036 | 4.23342922  | -3.09211432 |
| H | -4.18023920 | -4.53840545 | -0.39846611 |
| H | -4.48818821 | -5.00119049 | 2.02240507  |
| H | -2.80706909 | -4.19458540 | 3.66484320  |
| H | -1.31331101 | -2.54798025 | -1.81397822 |
| H | 3.69197835  | -1.18664706 | 1.81599005  |
| H | -4.26376622 | -3.29648936 | -2.25654326 |
| H | -3.20228716 | -2.43190928 | -3.38140934 |
| H | -3.66009421 | -1.67756222 | -1.83857522 |
| H | -0.83334993 | -5.00039343 | -1.94734823 |
| H | -1.59085700 | -4.40445540 | -3.43964434 |
| H | -2.54916306 | -5.32771246 | -2.25990026 |
| H | 5.94537646  | 0.88150514  | 2.07625807  |
| H | 4.62021338  | 0.61693510  | 3.23041816  |
| H | 4.26414135  | 1.21410214  | 1.59692204  |
| H | 5.47166450  | -2.93496516 | 2.20602508  |
| H | 5.28246048  | -1.83739807 | 3.59133719  |
| H | 6.66349559  | -1.65160304 | 2.49489611  |
| H | 7.17493260  | -0.54414094 | 0.49894995  |
| H | 7.80478365  | -0.77743995 | -1.89213823 |
| H | 6.10055356  | -1.40902603 | -3.57871636 |
| H | 0.21137310  | -2.14287819 | 2.74297913  |



|   |             |             |             |
|---|-------------|-------------|-------------|
| H | 2.44155326  | -1.89961613 | -2.80324130 |
| H | -1.86580405 | -2.61481826 | 4.95293330  |
| H | -1.64474506 | -1.13088315 | 3.97911522  |
| H | -0.36511996 | -1.67536516 | 5.08089930  |
| H | 1.05930719  | -3.70688630 | 4.49571426  |
| H | 0.80874919  | -4.57994536 | 2.96759315  |
| H | -0.36437690 | -4.75037340 | 4.28881325  |
| H | 3.19868828  | 0.11168004  | -4.05382339 |
| H | 2.63812526  | -1.17843607 | -5.13264648 |
| H | 4.37679739  | -0.87113802 | -4.95503746 |
| H | 3.68784440  | -4.08728228 | -2.96247431 |
| H | 4.69932146  | -3.41240921 | -4.25305141 |
| H | 2.95488333  | -3.62702125 | -4.51392443 |
| O | -1.24332606 | 0.22812997  | 1.69022005  |
| O | 0.23257506  | 0.21729699  | 2.09892807  |

**Peroxo Complex with adsorbed O<sub>2</sub> molecule (planar conformation)**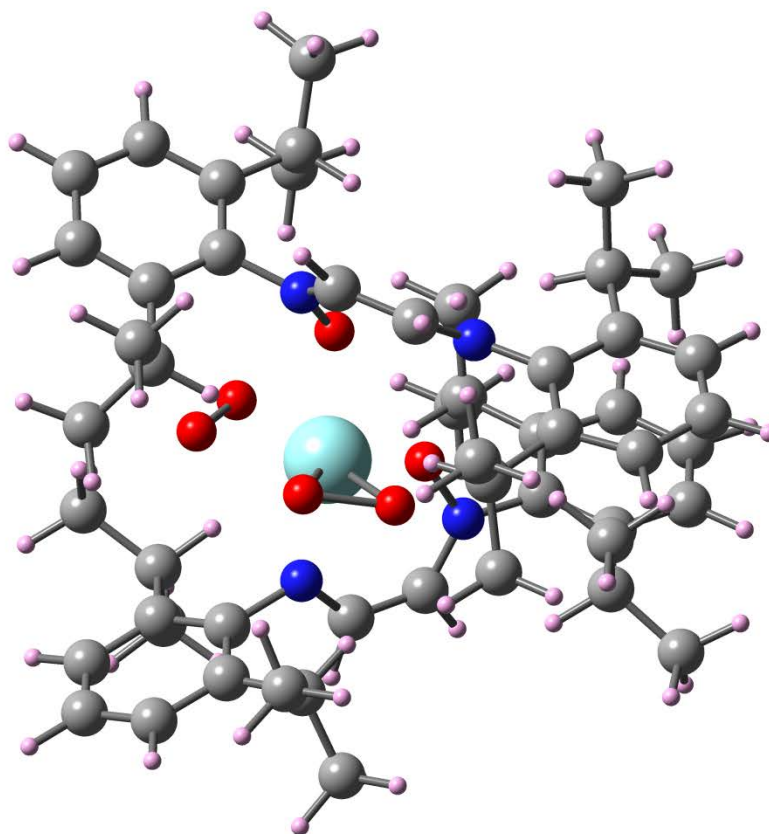Fig. S87: NCCNO Peroxo Complex with adsorbed O<sub>2</sub> molecule (planar conformation)

| SCF          | E <sub>ZP</sub> | H            | G            |
|--------------|-----------------|--------------|--------------|
| -2741.407976 | -2740.255281    | -2740.182989 | -2740.369479 |

|    |             |             |             |
|----|-------------|-------------|-------------|
| Zr | -0.80315806 | -0.31857502 | -0.00502400 |
| O  | 0.76171006  | -1.36640611 | -0.94115507 |
| O  | -0.45548904 | 1.68092113  | -0.86686207 |
| O  | -2.89589222 | -0.02668100 | -0.73600205 |
| N  | 1.83349314  | 2.54621320  | 0.77660906  |
| N  | -0.91160407 | 2.90201222  | -0.48489404 |
| N  | -1.45709111 | -2.44562318 | 0.45717003  |
| N  | 1.27843210  | -2.65113720 | -0.91623807 |
| C  | 0.91975307  | 3.39307326  | 1.14864809  |
| C  | -0.30311802 | 3.65514028  | 0.40971903  |
| C  | -0.72706405 | -3.56478627 | 0.20110202  |
| C  | 0.52684004  | -3.67111828 | -0.41521403 |
| C  | 3.03381723  | 2.35024018  | 1.50134911  |
| C  | 3.08618923  | 2.20103217  | 2.92644622  |
| C  | 4.35805133  | 2.05456616  | 3.51757227  |
| C  | 5.53275843  | 2.04249416  | 2.75032721  |

|   |             |             |             |
|---|-------------|-------------|-------------|
| C | 5.45816540  | 2.12538216  | 1.34893810  |
| C | 4.21868932  | 2.25573817  | 0.69969005  |
| C | 1.84328714  | 0.76987806  | 4.62785935  |
| C | 1.84306814  | 2.09449816  | 3.82193129  |
| C | 1.72214813  | 3.31503025  | 4.77350736  |
| C | -4.65028436 | 2.04229715  | 1.25632109  |
| C | -3.47197527 | 3.02880723  | 1.04899808  |
| C | -3.63561628 | 4.26829832  | 1.97049415  |
| C | -2.13434516 | 3.37084326  | -1.16043109 |
| C | -3.34098325 | 3.44949827  | -0.42073603 |
| C | -4.47113034 | 3.94013030  | -1.10981709 |
| C | -4.39960633 | 4.30190933  | -2.46279719 |
| C | -3.19169524 | 4.17869932  | -3.16786424 |
| C | -2.02527715 | 3.70832728  | -2.53252020 |
| C | 5.16412440  | 1.50413212  | -1.56980112 |
| C | 4.12699731  | 2.37411118  | -0.82309606 |
| C | 4.24847732  | 3.86094329  | -1.26093510 |
| C | -0.84309206 | 2.36751418  | -4.31936733 |
| C | -0.72464505 | 3.55681027  | -3.32798525 |
| C | -0.33599003 | 4.86363337  | -4.06485731 |
| C | -2.74815921 | -2.69201820 | 1.10477208  |
| C | -3.87861130 | -3.03686123 | 0.30884302  |
| C | -5.10782139 | -3.26609225 | 0.96353807  |
| C | -5.22022740 | -3.16547824 | 2.35751818  |
| C | -4.09054531 | -2.84715422 | 3.12590324  |
| C | -2.83717422 | -2.60837820 | 2.52371019  |
| C | -4.91783838 | -2.46934519 | -1.96730715 |
| C | -3.79759329 | -3.22603624 | -1.21102009 |
| C | -3.82611929 | -4.73721036 | -1.57305412 |
| C | 3.67052428  | -1.53624512 | 1.37736311  |
| C | 3.57762327  | -2.99951923 | 0.86249407  |
| C | 4.60845935  | -3.89964530 | 1.58278312  |
| C | 2.58657720  | -2.82033721 | -1.51536111 |
| C | 3.70779228  | -3.02241123 | -0.66528105 |
| C | 4.96586438  | -3.17351424 | -1.28436210 |
| C | 5.09955939  | -3.11016024 | -2.68171221 |
| C | 3.97479630  | -2.89857022 | -3.49326927 |
| C | 2.69063220  | -2.75290821 | -2.92726622 |
| C | -1.87003214 | -1.30698010 | 4.51452134  |
| C | -1.61071512 | -2.35838318 | 3.40912326  |
| C | -1.12214809 | -3.69801128 | 4.02783231  |
| C | 1.53695012  | -1.09712808 | -4.45834034 |
| C | 1.47465311  | -2.51311519 | -3.82612429 |
| C | 1.33501010  | -3.60478428 | -4.91738938 |
| H | 1.04231808  | 4.05016431  | 2.01747515  |
| H | -0.80793406 | 4.59334935  | 0.61559305  |
| H | -1.15657709 | -4.51765934 | 0.51106204  |
| H | 0.97169707  | -4.65316836 | -0.52109104 |
| H | 4.42831934  | 1.93720615  | 4.59598735  |
| H | 6.49944451  | 1.94623815  | 3.23951024  |
| H | 6.37053947  | 2.08002716  | 0.76156406  |
| H | 0.94907407  | 2.04541116  | 3.19465524  |

|   |             |             |             |
|---|-------------|-------------|-------------|
| H | -2.56723520 | 2.49361419  | 1.35762910  |
| H | 2.70730021  | 0.69220205  | 5.30109739  |
| H | 1.84028914  | -0.08349601 | 3.94221330  |
| H | 0.93233207  | 0.71005806  | 5.23765940  |
| H | 2.57480320  | 3.36504525  | 5.46389543  |
| H | 0.80656806  | 3.23816024  | 5.37467541  |
| H | 1.69180113  | 4.26601533  | 4.22326132  |
| H | -5.62177541 | 2.52153819  | 1.07473708  |
| H | -4.64542235 | 1.67731313  | 2.29098118  |
| H | -4.55771135 | 1.17863409  | 0.59037405  |
| H | -2.79199321 | 4.96726238  | 1.88259914  |
| H | -3.70160128 | 3.94975130  | 3.01859223  |
| H | -4.55084035 | 4.82440437  | 1.72742113  |
| H | -5.41863739 | 4.01747731  | -0.58473704 |
| H | -5.28773640 | 4.66908536  | -2.97142722 |
| H | -3.15361924 | 4.45038234  | -4.21902232 |
| H | 3.12505624  | 2.03085516  | -1.10642409 |
| H | 0.08968101  | 3.31148125  | -2.63786520 |
| H | 6.19214546  | 1.85821314  | -1.41284711 |
| H | 4.96873238  | 1.54063312  | -2.64967620 |
| H | 5.10862439  | 0.45520503  | -1.25354809 |
| H | 5.22993440  | 4.27073233  | -0.98534808 |
| H | 3.47740526  | 4.48055534  | -0.78583706 |
| H | 4.13514032  | 3.95107730  | -2.34989718 |
| H | -1.09245608 | 1.44299211  | -3.78763529 |
| H | 0.10818101  | 2.22012817  | -4.84773237 |
| H | -1.62349813 | 2.55404119  | -5.06959139 |
| H | -1.07612608 | 5.13718339  | -4.82764437 |
| H | 0.62826405  | 4.73276736  | -4.57308435 |
| H | -0.24289502 | 5.70681044  | -3.36788426 |
| H | -5.98359845 | -3.52691627 | 0.37480203  |
| H | -6.17769649 | -3.34378126 | 2.84216222  |
| H | -4.17977532 | -2.78934321 | 4.20749132  |
| H | -2.84503322 | -2.81736522 | -1.56172512 |
| H | 2.58164020  | -3.36901626 | 1.13372409  |
| H | -5.91355248 | -2.86470022 | -1.72505313 |
| H | -4.77368836 | -2.57500820 | -3.05091823 |
| H | -4.89579137 | -1.40241211 | -1.72348213 |
| H | -3.00249523 | -5.28310840 | -1.09459409 |
| H | -3.73886829 | -4.87118237 | -2.65991821 |
| H | -4.76738536 | -5.20074540 | -1.24814709 |
| H | 4.64509635  | -1.09666508 | 1.12712909  |
| H | 3.55574027  | -1.51022912 | 2.46847319  |
| H | 2.88677222  | -0.90714407 | 0.94292107  |
| H | 4.59524335  | -4.92696138 | 1.19560609  |
| H | 4.37775534  | -3.93601630 | 2.65506120  |
| H | 5.63054642  | -3.51075727 | 1.48541711  |
| H | 5.84768742  | -3.33508425 | -0.67237005 |
| H | 6.08144544  | -3.22465124 | -3.13538524 |
| H | 4.09230431  | -2.85189422 | -4.57277735 |
| H | -0.80358206 | -1.96124915 | 2.78815522  |
| H | 0.57224704  | -2.54602020 | -3.20691124 |

|   |             |             |             |
|---|-------------|-------------|-------------|
| H | -2.65019520 | -1.62543613 | 5.21965540  |
| H | -2.15844816 | -0.35280503 | 4.06203531  |
| H | -0.94918007 | -1.14340709 | 5.09018339  |
| H | -0.22135402 | -3.53123327 | 4.63425735  |
| H | -0.87741506 | -4.43411234 | 3.25035925  |
| H | -1.89220615 | -4.13878131 | 4.67590936  |
| H | 1.57925312  | -0.32940403 | -3.67767928 |
| H | 0.64382805  | -0.91597407 | -5.07062039 |
| H | 2.42031419  | -0.98835907 | -5.10253639 |
| H | 1.28044510  | -4.60805635 | -4.47545934 |
| H | 2.17955117  | -3.59046127 | -5.61877143 |
| H | 0.41865203  | -3.43746526 | -5.49828545 |
| O | -1.24076809 | 0.51588204  | 1.80214414  |
| O | 0.23355802  | 0.00292300  | 1.72682013  |
| O | -2.20188617 | -0.41466703 | -1.88349414 |

Peroxo Complex with adsorbed O<sub>2</sub> molecule (butterfly conformation)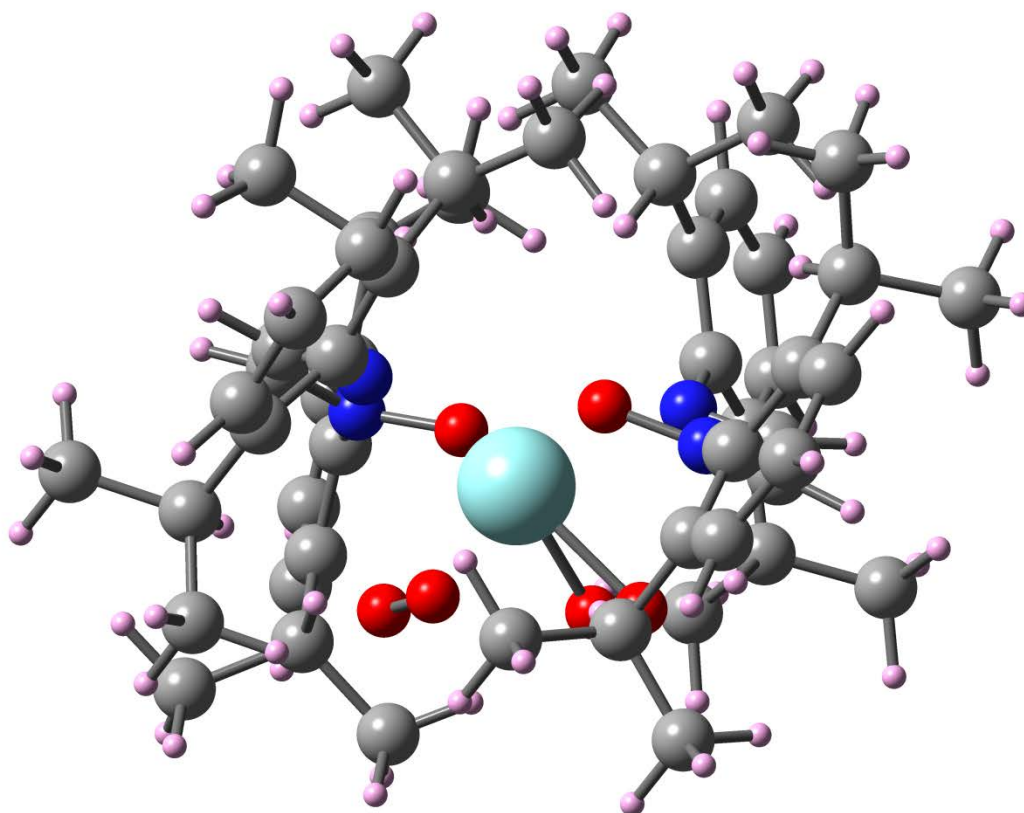Fig. S88: NCCNO Peroxo Complex with adsorbed O<sub>2</sub> molecule (butterfly conformation)

| SCF          | E <sub>ZP</sub> | H            | G            |
|--------------|-----------------|--------------|--------------|
| -2741.399877 | -2740.246009    | -2740.174721 | -2740.354124 |

|   |             |             |             |
|---|-------------|-------------|-------------|
| O | 1.97152515  | 0.20581994  | -0.02365896 |
| O | 0.68835904  | -0.29002104 | -2.54900016 |
| N | -0.04028093 | 1.87203916  | 1.13419713  |
| N | 2.86699626  | 1.12437497  | 0.51992708  |
| N | -2.74433127 | -1.18633096 | -0.78418402 |
| N | 0.14901792  | -2.06683415 | -0.51298600 |
| C | 1.09434418  | 2.39014015  | 1.68021117  |
| C | 2.42623127  | 2.08762207  | 1.37290514  |
| C | -2.13270226 | -2.16197306 | -1.43955707 |
| C | -0.80965818 | -2.68188116 | -1.16116305 |
| C | -1.26824100 | 2.53250626  | 1.57923216  |
| C | -1.59358396 | 3.84825537  | 1.12652813  |
| C | -2.82649703 | 4.40552747  | 1.53342416  |
| C | -3.70441013 | 3.71313746  | 2.37741622  |
| C | -3.33692616 | 2.45221534  | 2.87071426  |
| C | -2.11962609 | 1.85143125  | 2.49544923  |

|   |             |             |             |
|---|-------------|-------------|-------------|
| C | -1.33033388 | 5.34053549  | -0.95293203 |
| C | -0.64678886 | 4.72573840  | 0.29397206  |
| C | -0.04471276 | 5.85460647  | 1.17834913  |
| C | 3.49824634  | 1.74961600  | -3.39686822 |
| C | 3.68938538  | 2.39369704  | -1.99959611 |
| C | 4.16953548  | 3.86388613  | -2.12883512 |
| C | 4.25230236  | 0.98925790  | 0.10382505  |
| C | 4.64780242  | 1.58288894  | -1.12351605 |
| C | 5.99518849  | 1.43227786  | -1.51521508 |
| C | 6.90909353  | 0.73422377  | -0.71197602 |
| C | 6.49414951  | 0.17045775  | 0.50515108  |
| C | 5.15552640  | 0.27693781  | 0.93578711  |
| C | -2.81257724 | -0.45345190 | 3.39479430  |
| C | -1.66872811 | 0.55970212  | 3.17921128  |
| C | -0.98114904 | 0.90644813  | 4.53040139  |
| C | 5.26710732  | -1.75538635 | 2.48952923  |
| C | 4.72853434  | -0.31961721 | 2.28012122  |
| C | 5.17703142  | 0.59583084  | 3.45336830  |
| C | -4.19958037 | -1.01684889 | -0.83011602 |
| C | -4.75154337 | 0.01041522  | -1.63594008 |
| C | -6.15945448 | 0.11366928  | -1.66625009 |
| C | -6.97114559 | -0.75974775 | -0.93010903 |
| C | -6.39254457 | -1.76575085 | -0.14012297 |
| C | -4.99342347 | -1.91725992 | -0.06503596 |
| C | -4.20501122 | 2.43932538  | -2.15402513 |
| C | -3.91236127 | 0.95656925  | -2.49461315 |
| C | -4.14373929 | 0.67777824  | -4.00417226 |
| C | 1.12509498  | -2.32076521 | 3.59564932  |
| C | 0.45330191  | -2.76320622 | 2.27480921  |
| C | -0.59359122 | -3.87950526 | 2.54682024  |
| C | 1.30059797  | -2.89749326 | -0.15670897 |
| C | 1.45623997  | -3.23219129 | 1.21706913  |
| C | 2.50135201  | -4.10339541 | 1.57923116  |
| C | 3.37667306  | -4.62507748 | 0.61424308  |
| C | 3.21058606  | -4.27640545 | -0.73162002 |
| C | 2.17323002  | -3.41506134 | -1.15464805 |
| C | -5.07895753 | -3.16182601 | 2.17929321  |
| C | -4.39914747 | -3.04400903 | 0.79166310  |
| C | -4.48935354 | -4.40771914 | 0.05034404  |
| C | 3.35926715  | -2.39998631 | -3.15440820 |
| C | 2.06487602  | -3.08773631 | -2.64826216 |
| C | 1.75410994  | -4.35407039 | -3.48885523 |
| H | 0.97811920  | 3.17865721  | 2.42402323  |
| H | 3.20866235  | 2.68436308  | 1.82578418  |
| H | -2.75661434 | -2.73078708 | -2.11816812 |
| H | -0.65781722 | -3.70794824 | -1.50715307 |
| H | -3.09535701 | 5.39971354  | 1.18599213  |
| H | -4.65213618 | 4.16079253  | 2.66793725  |
| H | -3.99725323 | 1.93716833  | 3.56280531  |
| H | 0.17964418  | 4.11076732  | -0.07026597 |
| H | 2.70637731  | 2.41613608  | -1.52369707 |
| H | -2.13427691 | 6.03702355  | -0.67838701 |

|   |             |             |             |
|---|-------------|-------------|-------------|
| H | -1.74728595 | 4.55494543  | -1.58948808 |
| H | -0.59281780 | 5.90265651  | -1.54149208 |
| H | -0.83071079 | 6.52635857  | 1.54844016  |
| H | 0.66660232  | 6.45519550  | 0.59517009  |
| H | 0.48455326  | 5.45163641  | 2.05188520  |
| H | 4.45138940  | 1.67017595  | -3.93812326 |
| H | 2.81390331  | 2.36282707  | -3.99627427 |
| H | 3.05461726  | 0.75239694  | -3.31394821 |
| H | 4.29236351  | 4.33420116  | -1.14416505 |
| H | 3.43318845  | 4.44637320  | -2.69690217 |
| H | 5.13055656  | 3.92927809  | -2.65628916 |
| H | 6.32899255  | 1.87164588  | -2.45159815 |
| H | 7.94397161  | 0.63213272  | -1.03078504 |
| H | 7.21370854  | -0.36389332 | 1.11905412  |
| H | -0.91857507 | 0.08460806  | 2.53817623  |
| H | 3.63388226  | -0.37476417 | 2.29317421  |
| H | -3.54651428 | -0.09548384 | 4.12917736  |
| H | -2.41196825 | -1.40343299 | 3.77427433  |
| H | -3.32995129 | -0.64445189 | 2.44993623  |
| H | -1.67890307 | 1.43260220  | 5.19563844  |
| H | -0.10850795 | 1.55360614  | 4.37732637  |
| H | -0.64379006 | -0.00443896 | 5.04275642  |
| H | 4.98418427  | -2.40878038 | 1.65799517  |
| H | 4.85069127  | -2.17925436 | 3.41308830  |
| H | 6.36065740  | -1.76893040 | 2.58674524  |
| H | 6.27150252  | 0.68134980  | 3.48314331  |
| H | 4.84254837  | 0.17939482  | 4.41300338  |
| H | 4.76420443  | 1.60791793  | 3.36055230  |
| H | -6.61789745 | 0.88493436  | -2.27836613 |
| H | -8.05314664 | -0.65960669 | -0.97096303 |
| H | -7.03378764 | -2.43259387 | 0.42857507  |
| H | -2.85267019 | 0.78196319  | -2.30363314 |
| H | -0.08753709 | -1.89925013 | 1.87330718  |
| H | -5.24338029 | 2.71424644  | -2.38605214 |
| H | -3.54241914 | 3.08481340  | -2.74172617 |
| H | -4.01990320 | 2.64650839  | -1.09394804 |
| H | -3.89671732 | -0.36017985 | -4.26121729 |
| H | -3.49577822 | 1.33126327  | -4.60059131 |
| H | -5.18589037 | 0.86625130  | -4.29725329 |
| H | 1.62208498  | -3.15717030 | 4.10356036  |
| H | 0.37109394  | -1.92269215 | 4.28574437  |
| H | 1.87085807  | -1.53721619 | 3.41675530  |
| H | -1.11970327 | -4.16727626 | 1.62669117  |
| H | -1.34027426 | -3.53997020 | 3.27693729  |
| H | -0.10741422 | -4.77907135 | 2.94696527  |
| H | 2.62805101  | -4.38321343 | 2.62140024  |
| H | 4.17780109  | -5.29826158 | 0.91011111  |
| H | 3.89415909  | -4.67797751 | -1.47505807 |
| H | -3.33996638 | -2.82533006 | 0.97231411  |
| H | 1.26444899  | -2.36078722 | -2.80329617 |
| H | -6.11670764 | -3.50848299 | 2.09542820  |
| H | -5.08091449 | -2.20341394 | 2.70875025  |



|    |             |             |             |
|----|-------------|-------------|-------------|
| H  | -4.53905052 | -3.89261709 | 2.79543425  |
| H  | -4.04841254 | -5.20551321 | 0.66249809  |
| H  | -3.96533450 | -4.39023016 | -0.91346803 |
| H  | -5.53621761 | -4.67147011 | -0.14806297 |
| H  | 3.57548820  | -1.50504425 | -2.56131515 |
| H  | 3.23470015  | -2.09354329 | -4.20107928 |
| H  | 4.22867619  | -3.06949341 | -3.09742620 |
| H  | 0.82150585  | -4.83942140 | -3.16806920 |
| H  | 2.55722297  | -5.09945749 | -3.41189422 |
| H  | 1.64770795  | -4.08381137 | -4.54759231 |
| O  | 0.34228712  | 2.38288618  | -1.69174909 |
| O  | -1.03926399 | 2.18596722  | -1.60748008 |
| O  | -0.80250009 | -0.40417198 | -2.57821216 |
| O  | -2.02414817 | -0.31940793 | 0.01109504  |
| Zr | -0.02891299 | 0.40410104  | -0.72898102 |

## 6.6 Structures with seven oxygen atoms

 $\eta^2$ -ozone Complex with adsorbed O<sub>2</sub> molecule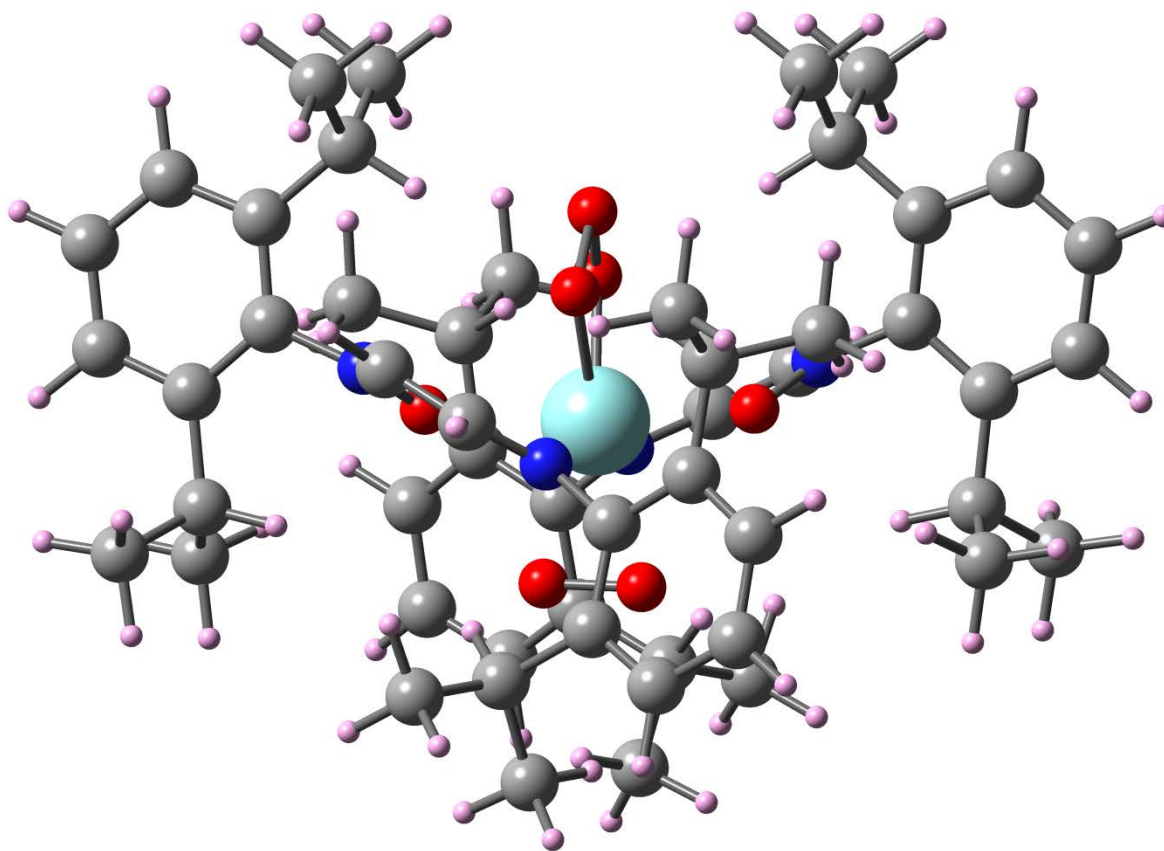Fig. S89: NCCNO  $\eta^2$ -ozone Complex with adsorbed O<sub>2</sub> molecule

| SCF          | E <sub>ZP</sub> | H            | G            |
|--------------|-----------------|--------------|--------------|
| -2816.559460 | -2815.402518    | -2815.329690 | -2815.514488 |

|    |             |             |             |
|----|-------------|-------------|-------------|
| Zr | 0.07674202  | -0.02530106 | 0.07463297  |
| O  | -2.15500933 | 0.21735600  | -0.18947007 |
| O  | 2.16422533  | -0.31370312 | 0.02983496  |
| O  | 0.00551001  | 0.57539603  | -2.00638536 |
| N  | 0.18382301  | -1.98174036 | 1.25614215  |
| N  | 2.86478943  | -1.49850131 | -0.16835807 |
| N  | -0.24225701 | 2.41777632  | -0.29160609 |
| N  | -2.81867841 | 0.96323913  | -1.08275021 |
| C  | 1.20963417  | -2.85715450 | 1.07595212  |
| C  | 2.41517735  | -2.65552048 | 0.39104601  |
| C  | -1.19769715 | 2.85164840  | -1.07108421 |
| C  | -2.36261133 | 2.12322129  | -1.53331628 |
| C  | -0.84518814 | -2.41918642 | 2.19924529  |
| C  | -0.65836511 | -2.17193038 | 3.59136351  |

|   |             |             |             |
|---|-------------|-------------|-------------|
| C | -1.66513127 | -2.59152844 | 4.48631764  |
| C | -2.81874245 | -3.24559252 | 4.03085857  |
| C | -2.97108648 | -3.51124857 | 2.66214136  |
| C | -1.99470332 | -3.11486151 | 1.72292121  |
| C | 0.32476905  | -0.40739512 | 5.17231275  |
| C | 0.61844108  | -1.53582130 | 4.15339359  |
| C | 1.52699621  | -2.62275247 | 4.79238169  |
| C | 5.32516283  | 1.12346808  | 1.63199720  |
| C | 5.03941878  | -0.39036016 | 1.45413917  |
| C | 5.92080893  | -1.23674529 | 2.41031432  |
| C | 4.17189564  | -1.36326530 | -0.78140117 |
| C | 5.22948580  | -0.82512322 | -0.00231405 |
| C | 6.49449496  | -0.71159222 | -0.61438914 |
| C | 6.69322906  | -1.12173729 | -1.94297534 |
| C | 5.62699585  | -1.64685935 | -2.68905646 |
| C | 4.33676865  | -1.77055137 | -2.12955837 |
| C | -3.58496057 | -3.33342653 | -0.28573609 |
| C | -2.14926935 | -3.53169957 | 0.25578099  |
| C | -1.71294630 | -5.01326280 | 0.07574797  |
| C | 2.98124545  | -1.51392331 | -4.26949270 |
| C | 3.18518047  | -2.33116644 | -2.96866850 |
| C | 3.41450249  | -3.83192267 | -3.29156155 |
| C | 0.73776215  | 3.41369046  | 0.16032398  |
| C | 1.88438832  | 3.68375749  | -0.63596615 |
| C | 2.80711847  | 4.63393164  | -0.14696607 |
| C | 2.60175445  | 5.29541773  | 1.07150312  |
| C | 1.44802027  | 5.02892771  | 1.82353724  |
| C | 0.49159812  | 4.08913856  | 1.38869617  |
| C | 3.53004657  | 2.41038029  | -2.12462637 |
| C | 2.12427136  | 3.04963439  | -2.01166735 |
| C | 1.91137734  | 4.10339155  | -3.13371552 |
| C | -5.28526780 | 0.13407101  | 1.91059925  |
| C | -5.05426375 | 1.18714717  | 0.79477707  |
| C | -6.00648193 | 2.39977936  | 0.96576211  |
| C | -4.12541561 | 0.44162105  | -1.50999627 |
| C | -5.20000279 | 0.55515508  | -0.59367613 |
| C | -6.44808495 | 0.05287101  | -1.01481920 |
| C | -6.60236806 | -0.52877608 | -2.28378139 |
| C | -5.50973785 | -0.62847310 | -3.15809553 |
| C | -4.23226364 | -0.15285104 | -2.79064047 |
| C | -0.52049704 | 3.71731852  | 3.71594853  |
| C | -0.79277608 | 3.88658155  | 2.20175529  |
| C | -1.78063122 | 5.05964074  | 1.95010625  |
| C | -2.83020943 | -1.77262930 | -4.16872468 |
| C | -3.05306546 | -0.29483007 | -3.75883562 |
| C | -3.25629948 | 0.60045706  | -5.01063381 |
| H | 1.11019415  | -3.84276265 | 1.53136419  |
| H | 3.10030245  | -3.48967062 | 0.29880200  |
| H | -1.17834014 | 3.89092855  | -1.41082626 |
| H | -3.00330643 | 2.61806637  | -2.25291239 |
| H | -1.54025925 | -2.40745840 | 5.55025880  |
| H | -3.58407858 | -3.55980156 | 4.73727168  |

|   |             |             |             |
|---|-------------|-------------|-------------|
| H | -3.85295462 | -4.04478164 | 2.31761631  |
| H | 1.17296818  | -1.08377723 | 3.32659746  |
| H | 3.99357262  | -0.55001317 | 1.73348422  |
| H | -0.15653702 | -0.79091617 | 6.08225090  |
| H | -0.32665604 | 0.35170201  | 4.72706068  |
| H | 1.26287521  | 0.07760895  | 5.47382682  |
| H | 1.02311514  | -3.11176954 | 5.63722781  |
| H | 2.45678737  | -2.17218940 | 5.16605174  |
| H | 1.79324925  | -3.40049759 | 4.06515857  |
| H | 6.36524796  | 1.36940511  | 1.37809817  |
| H | 5.15269780  | 1.41977912  | 2.67501136  |
| H | 4.66390874  | 1.72323917  | 0.99676211  |
| H | 5.70546284  | -2.30832446 | 2.30845131  |
| H | 5.73183687  | -0.94830824 | 3.45280549  |
| H | 6.99016407  | -1.08777128 | 2.20977129  |
| H | 7.32847512  | -0.30517516 | -0.04761705 |
| H | 7.67781217  | -1.03011828 | -2.39622641 |
| H | 5.79306686  | -1.95364140 | -3.71848461 |
| H | -1.48166124 | -2.92103549 | -0.35795510 |
| H | 2.25659033  | -2.24842142 | -2.39694441 |
| H | -4.31127968 | -3.99414963 | 0.20701699  |
| H | -3.61149858 | -3.56452556 | -1.35894425 |
| H | -3.91742361 | -2.29779837 | -0.15431707 |
| H | -2.34445340 | -5.68684591 | 0.67185206  |
| H | -0.67129514 | -5.16445584 | 0.38536201  |
| H | -1.79594231 | -5.30776089 | -0.97912520 |
| H | 2.77664243  | -0.46256215 | -4.03816566 |
| H | 2.11766032  | -1.90628337 | -4.82058978 |
| H | 3.85888759  | -1.56427133 | -4.92889380 |
| H | 4.32100663  | -3.97911269 | -3.89469965 |
| H | 2.56207536  | -4.22892472 | -3.85789563 |
| H | 3.51963051  | -4.42862876 | -2.37578641 |
| H | 3.69291561  | 4.85896366  | -0.73502216 |
| H | 3.32935956  | 6.02086883  | 1.42771017  |
| H | 1.28641025  | 5.55635879  | 2.75946938  |
| H | 1.40161525  | 2.24502528  | -2.17142837 |
| H | -4.02840359 | 1.55157022  | 0.91691809  |
| H | 4.33270770  | 3.15400039  | -2.02748136 |
| H | 3.64185058  | 1.92780621  | -3.10456652 |
| H | 3.66958358  | 1.64356017  | -1.35595025 |
| H | 0.90196319  | 4.53636363  | -3.09703451 |
| H | 2.04466135  | 3.63741249  | -4.11890468 |
| H | 2.63057445  | 4.92925668  | -3.04781951 |
| H | -6.29864693 | -0.28615504 | 1.85967324  |
| H | -5.16012077 | 0.59844408  | 2.89709640  |
| H | -4.56557670 | -0.68762112 | 1.83112123  |
| H | -5.83495584 | 3.16010348  | 0.19235798  |
| H | -5.84670490 | 2.86697544  | 1.94608326  |
| H | -7.05977903 | 2.09631833  | 0.90981310  |
| H | -7.30221306 | 0.11866003  | -0.34648410 |
| H | -7.57431214 | -0.90909512 | -2.58865444 |
| H | -5.64271385 | -1.09067817 | -4.13218968 |

|   |             |             |             |
|---|-------------|-------------|-------------|
| H | -1.27414716 | 2.96225442  | 1.86885524  |
| H | -2.13066432 | 0.02344897  | -3.26588555 |
| H | -0.11646597 | 4.63344265  | 4.16685759  |
| H | 0.18740406  | 2.90021939  | 3.88848654  |
| H | -1.45579318 | 3.47692150  | 4.23837460  |
| H | -2.71259536 | 4.90168271  | 2.50972633  |
| H | -2.03377725 | 5.15750375  | 0.88527009  |
| H | -1.34729414 | 6.01470688  | 2.27564030  |
| H | -2.64017142 | -2.39530139 | -3.28795655 |
| H | -1.94930031 | -1.84243432 | -4.81772678 |
| H | -3.69114357 | -2.18404136 | -4.71307677 |
| H | -3.37624450 | 1.65875423  | -4.74025976 |
| H | -4.14557562 | 0.29967903  | -5.58075492 |
| H | -2.38555435 | 0.51846605  | -5.67308391 |
| O | 0.71099113  | 0.99454908  | 2.03717226  |
| O | -0.64215709 | 0.67243405  | 2.10831828  |
| O | 0.08910202  | -0.79707518 | -2.59360044 |
| O | -0.02812701 | -1.62522830 | -1.34768826 |

$\eta^3$ -ozone Complex with adsorbed O<sub>2</sub> molecule (conformation 1 lower energy)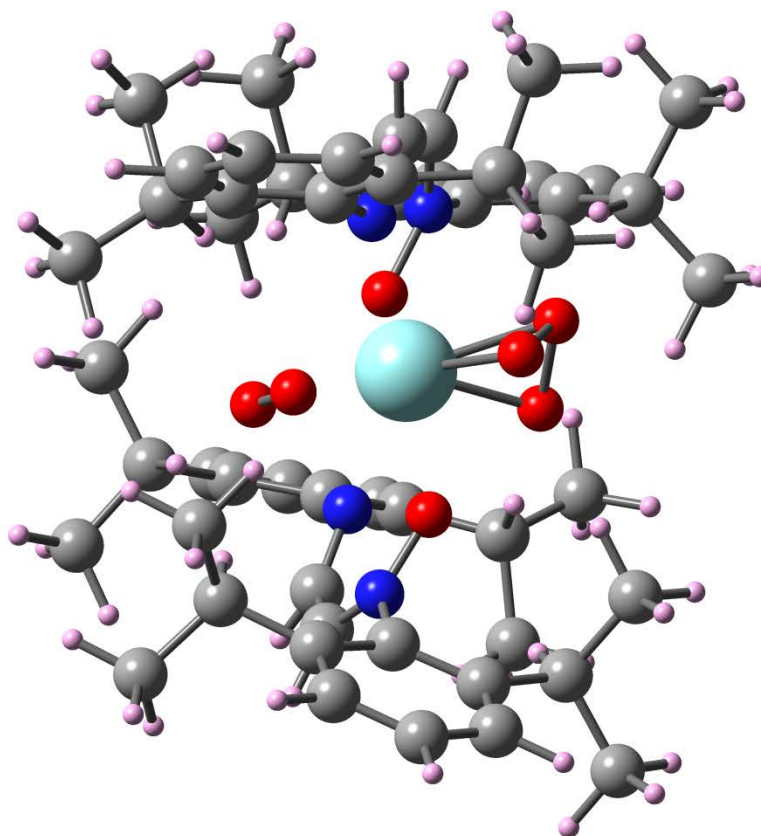Fig. S90: NCCNO  $\eta^3$ -ozone Complex with adsorbed O<sub>2</sub> molecule (conformation 1 lower energy)

| SCF          | E <sub>ZP</sub> | H            | G            |
|--------------|-----------------|--------------|--------------|
| -2816.543155 | -2815.385880    | -2815.313527 | -2815.495178 |

|    |             |             |             |
|----|-------------|-------------|-------------|
| Zr | 0.21413962  | 0.24595682  | -0.36207268 |
| O  | -1.85297878 | 0.32092826  | 0.12458030  |
| O  | 2.17746923  | -0.98809261 | -0.68684543 |
| O  | 1.10888223  | 0.88360476  | -2.18910757 |
| N  | -0.00260423 | -2.06469861 | 0.84423294  |
| N  | 2.92496384  | -1.78456644 | 0.07015296  |
| N  | -0.21427834 | 2.54416232  | -0.17404203 |
| N  | -2.83552675 | 1.08421690  | -0.52407750 |
| C  | 1.01723619  | -2.75515322 | 1.29100261  |
| C  | 2.42198463  | -2.58566539 | 0.99546158  |
| C  | -1.40209676 | 3.08173802  | -0.54610878 |
| C  | -2.60247851 | 2.40080207  | -0.77487429 |
| C  | -1.29350352 | -2.57717818 | 1.32902103  |
| C  | -1.65808383 | -2.37361143 | 2.68798354  |
| C  | -2.85260535 | -2.97337173 | 3.14113674  |
| C  | -3.65394605 | -3.73989412 | 2.28482519  |

|   |             |             |             |
|---|-------------|-------------|-------------|
| C | -3.27463239 | -3.91656189 | 0.94508239  |
| C | -2.08955308 | -3.34704723 | 0.43779509  |
| C | -1.64434042 | -0.37445558 | 4.27519822  |
| C | -0.82431332 | -1.54647051 | 3.67755083  |
| C | -0.24969783 | -2.43707224 | 4.81238277  |
| C | 5.28151902  | 0.94082335  | 2.03453037  |
| C | 4.84744533  | -0.54710556 | 1.98992413  |
| C | 5.40994417  | -1.32952871 | 3.20644736  |
| C | 4.36184142  | -1.78311934 | -0.25233133 |
| C | 5.26759147  | -1.20380326 | 0.66899155  |
| C | 6.63196827  | -1.22419126 | 0.30607397  |
| C | 7.05020875  | -1.77023884 | -0.91596253 |
| C | 6.11373457  | -2.30995042 | -1.81287741 |
| C | 4.73839312  | -2.33057457 | -1.50554658 |
| C | -2.81108558 | -3.77607409 | -1.99019917 |
| C | -1.63595892 | -3.64155247 | -0.99506474 |
| C | -0.76307290 | -4.92770267 | -1.03427231 |
| C | 3.46372259  | -1.85833499 | -3.64092842 |
| C | 3.72721708  | -2.89230789 | -2.51086909 |
| C | 4.17321434  | -4.25711387 | -3.09322535 |
| C | 0.81359755  | 3.53020024  | 0.16218427  |
| C | 1.55739328  | 4.18703307  | -0.85926414 |
| C | 2.54035398  | 5.12363420  | -0.46904914 |
| C | 2.77455112  | 5.42304750  | 0.87978220  |
| C | 2.00141466  | 4.80099971  | 1.87164303  |
| C | 1.00900005  | 3.85768121  | 1.53791645  |
| C | 2.59077256  | 3.54806053  | -3.10677666 |
| C | 1.30516810  | 3.97579011  | -2.35673785 |
| C | 0.69847020  | 5.25457456  | -2.99618458 |
| C | -5.39307019 | -0.28193811 | 2.73954705  |
| C | -4.68435435 | 0.56865482  | 1.66181281  |
| C | -5.07700235 | 2.06353727  | 1.84547384  |
| C | -4.08996460 | 0.42663577  | -0.83970889 |
| C | -4.98161881 | 0.11818256  | 0.22687844  |
| C | -6.18511545 | -0.53641890 | -0.09665791 |
| C | -6.50337847 | -0.84978695 | -1.42995830 |
| C | -5.62727245 | -0.49809535 | -2.46453789 |
| C | -4.39866609 | 0.14819447  | -2.19761382 |
| C | 0.88087552  | 2.91121243  | 3.92619746  |
| C | 0.10946784  | 3.28401150  | 2.63794786  |
| C | -1.03733845 | 4.28211274  | 2.96253153  |
| C | -3.13206369 | -0.63439483 | -4.28400081 |
| C | -3.50394285 | 0.56102033  | -3.37229402 |
| C | -4.18643660 | 1.68832389  | -4.19540362 |
| H | 0.83003583  | -3.59752106 | 1.96274345  |
| H | 3.13256772  | -3.21754583 | 1.51261678  |
| H | -1.45069334 | 4.16171689  | -0.68658671 |
| H | -3.44949614 | 2.94625458  | -1.17201766 |
| H | -3.15503152 | -2.83515318 | 4.17616425  |
| H | -4.56743901 | -4.19792049 | 2.65693951  |
| H | -3.90244363 | -4.50935868 | 0.28725720  |
| H | 0.01977574  | -1.09324470 | 3.15195629  |

|   |             |             |             |
|---|-------------|-------------|-------------|
| H | 3.75605572  | -0.54611933 | 2.06685820  |
| H | -2.50637632 | -0.73398207 | 4.85223209  |
| H | -2.01182680 | 0.28616503  | 3.48199403  |
| H | -1.01232853 | 0.21923840  | 4.94843625  |
| H | -1.05176847 | -2.90356181 | 5.39907916  |
| H | 0.36116322  | -1.83368620 | 5.49676126  |
| H | 0.38022833  | -3.24548588 | 4.41630294  |
| H | 6.37246430  | 1.04896195  | 1.97681088  |
| H | 4.94461101  | 1.39797540  | 2.97338837  |
| H | 4.82882238  | 1.50219000  | 1.21052803  |
| H | 5.07760292  | -2.37691653 | 3.20751741  |
| H | 5.07336171  | -0.86468468 | 4.14182154  |
| H | 6.50756447  | -1.33082250 | 3.20787177  |
| H | 7.36672316  | -0.79258622 | 0.97991075  |
| H | 8.10608601  | -1.76714465 | -1.17531150 |
| H | 6.45301804  | -2.71908467 | -2.75957992 |
| H | -1.02201662 | -2.80305571 | -1.34080814 |
| H | 2.76791261  | -3.05161037 | -2.00475303 |
| H | -3.39829825 | -4.68789742 | -1.81336004 |
| H | -2.41966502 | -3.83181542 | -3.01363462 |
| H | -3.48369790 | -2.91343623 | -1.93087352 |
| H | -1.34004514 | -5.80146723 | -0.70130072 |
| H | 0.12143021  | -4.84433224 | -0.38931168 |
| H | -0.41596817 | -5.11655889 | -2.05860918 |
| H | 3.03077122  | -0.93911947 | -3.23431436 |
| H | 2.75144150  | -2.27236076 | -4.36621257 |
| H | 4.39374955  | -1.61507565 | -4.17319142 |
| H | 5.06853001  | -4.16118319 | -3.72077613 |
| H | 3.37459061  | -4.66412467 | -3.72620074 |
| H | 4.38966816  | -4.98753914 | -2.30228401 |
| H | 3.12283206  | 5.62763483  | -1.23662837 |
| H | 3.53896110  | 6.14642529  | 1.15507028  |
| H | 2.16548628  | 5.05701715  | 2.91486198  |
| H | 0.59155879  | 3.15946752  | -2.47889902 |
| H | -3.60362857 | 0.48006960  | 1.81798452  |
| H | 3.37077539  | 4.32071004  | -3.05914271 |
| H | 2.36294131  | 3.36227048  | -4.16484191 |
| H | 2.98740000  | 2.61901919  | -2.68458264 |
| H | -0.23701613 | 5.54847383  | -2.50103983 |
| H | 0.48127630  | 5.07950229  | -4.05863219 |
| H | 1.39100024  | 6.10473575  | -2.92910233 |
| H | -6.47980113 | -0.12056326 | 2.73517872  |
| H | -5.02676987 | 0.00526360  | 3.73371999  |
| H | -5.19719440 | -1.34999410 | 2.60054358  |
| H | -4.53489068 | 2.71545488  | 1.15242380  |
| H | -4.84525445 | 2.39298752  | 2.86730912  |
| H | -6.15391325 | 2.20214056  | 1.67858733  |
| H | -6.88378759 | -0.79736443 | 0.69168078  |
| H | -7.43901316 | -1.35533446 | -1.65869168 |
| H | -5.89268982 | -0.72809240 | -3.49302459 |
| H | -0.35123248 | 2.36715302  | 2.25722452  |
| H | -2.56272406 | 0.95596863  | -2.98475955 |



|   |             |             |             |
|---|-------------|-------------|-------------|
| H | 1.28912084  | 3.79614745  | 4.43247808  |
| H | 1.70570096  | 2.22620610  | 3.70121978  |
| H | 0.20479881  | 2.41319263  | 4.63417651  |
| H | -1.70811593 | 3.86287080  | 3.72547267  |
| H | -1.63475389 | 4.50558001  | 2.06985970  |
| H | -0.63415674 | 5.22950686  | 3.34554283  |
| H | -2.54767616 | -1.37154465 | -3.72636266 |
| H | -2.51151040 | -0.28101686 | -5.11746199 |
| H | -4.01973596 | -1.12419441 | -4.70737380 |
| H | -4.42884782 | 2.55812862  | -3.56996222 |
| H | -5.12013641 | 1.33781868  | -4.65554092 |
| H | -3.51834393 | 2.02361186  | -4.99936270 |
| O | 1.96175245  | 1.06265365  | 0.97212429  |
| O | 1.02304906  | 0.36932712  | 1.73771070  |
| O | -0.34223277 | 0.53286968  | -2.50569285 |
| O | -0.43396181 | -0.92563737 | -2.05604379 |

$\eta^3$ -ozone Complex with adsorbed O<sub>2</sub> molecule (conformation 2 higher energy)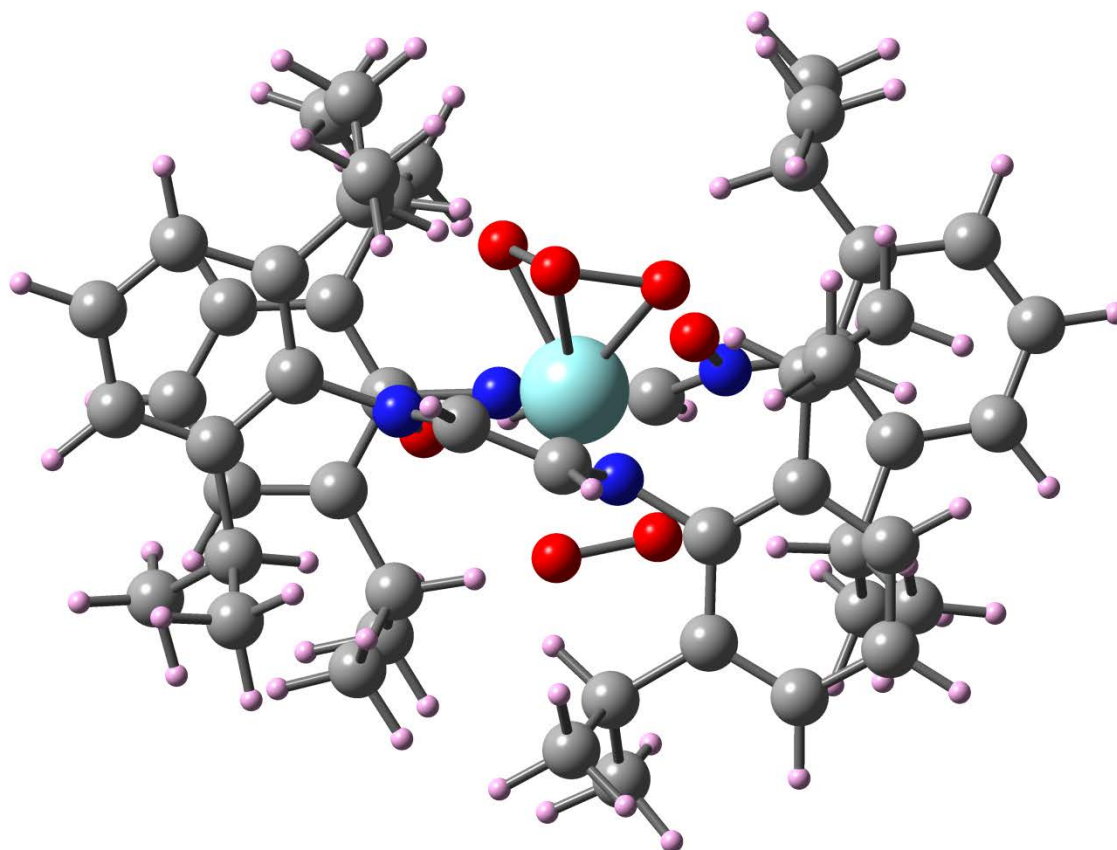

Fig. S91: NCCNO  $\eta^3$ -ozone Complex with adsorbed O<sub>2</sub> molecule (conformation 2 higher energy)

| SCF          | E <sub>ZP</sub> | H            | G            |
|--------------|-----------------|--------------|--------------|
| -2816.540097 | -2815.383427    | -2815.311620 | -2815.492692 |

|    |             |             |             |
|----|-------------|-------------|-------------|
| Zr | 0.19414982  | -0.12322767 | -0.26584468 |
| O  | -2.06522548 | 0.41185284  | 0.10976006  |
| O  | 2.12770810  | -0.96888457 | -0.60953892 |
| O  | 0.84653306  | 0.49808768  | -2.24970580 |
| N  | 0.04764028  | -2.08997299 | 0.93495346  |
| N  | 2.98217744  | -1.62546726 | 0.26655738  |
| N  | -0.11657560 | 2.46174762  | -0.41216515 |
| N  | -2.85229737 | 1.17363697  | -0.66228779 |
| C  | 1.13425389  | -2.72786664 | 1.45403588  |
| C  | 2.48704822  | -2.49296119 | 1.19201208  |
| C  | -1.19321483 | 2.99584138  | -0.91925634 |
| C  | -2.46516840 | 2.33877405  | -1.15686934 |
| C  | -1.23320005 | -2.67295901 | 1.34034178  |
| C  | -1.76537650 | -2.40446158 | 2.63435663  |
| C  | -3.01011743 | -2.97639709 | 2.97997324  |

|   |             |             |             |
|---|-------------|-------------|-------------|
| C | -3.70489649 | -3.80386409 | 2.08835786  |
| C | -3.14078662 | -4.10261251 | 0.83818259  |
| C | -1.89859729 | -3.56325024 | 0.44582098  |
| C | -1.86126128 | -0.37456062 | 4.19100557  |
| C | -1.02448816 | -1.57881159 | 3.69372497  |
| C | -0.59596857 | -2.47184628 | 4.88987805  |
| C | 5.00502120  | 1.45515547  | 2.04736716  |
| C | 4.71564205  | -0.06748370 | 2.08384115  |
| C | 5.31374298  | -0.71133456 | 3.36292798  |
| C | 4.39122864  | -1.50189460 | -0.05124229 |
| C | 5.23175486  | -0.76382090 | 0.82043316  |
| C | 6.59936064  | -0.67310890 | 0.48143067  |
| C | 7.09627432  | -1.26737425 | -0.68779872 |
| C | 6.23476121  | -1.97363766 | -1.54364640 |
| C | 4.86466917  | -2.11408957 | -1.24316419 |
| C | -2.25905688 | -4.29031696 | -1.99815784 |
| C | -1.24617008 | -4.02566716 | -0.86130749 |
| C | -0.39331644 | -5.30081544 | -0.60527999 |
| C | 3.60853097  | -2.01669489 | -3.44116594 |
| C | 3.93897883  | -2.88014028 | -2.19316711 |
| C | 4.52656080  | -4.25377470 | -2.60367874 |
| C | 0.97907787  | 3.39573788  | -0.10294323 |
| C | 1.91792223  | 3.77117501  | -1.10330437 |
| C | 2.96956510  | 4.63344514  | -0.72008815 |
| C | 3.07814615  | 5.12701526  | 0.58577903  |
| C | 2.10731152  | 4.78573147  | 1.53851336  |
| C | 1.03881229  | 3.92399306  | 1.22010172  |
| C | 3.10108706  | 2.59757155  | -3.03472439 |
| C | 1.82587169  | 3.34678463  | -2.57325561 |
| C | 1.54548667  | 4.57426301  | -3.48153912 |
| C | -5.30567070 | 0.32027604  | 2.74368505  |
| C | -4.73018825 | 1.16969584  | 1.58635059  |
| C | -5.19088151 | 2.64973292  | 1.71514454  |
| C | -4.22152749 | 0.67570704  | -0.90613276 |
| C | -5.10671739 | 0.62641403  | 0.20283744  |
| C | -6.40585041 | 0.14104038  | -0.04105579 |
| C | -6.79670771 | -0.27456259 | -1.32445923 |
| C | -5.89793773 | -0.19866866 | -2.39588018 |
| C | -4.58063409 | 0.28130406  | -2.22055725 |
| C | 0.51532459  | 3.34537664  | 3.66623167  |
| C | -0.05473489 | 3.66984320  | 2.26463258  |
| C | -1.01921754 | 4.88689468  | 2.33476407  |
| C | -3.51692117 | -0.98796740 | -4.16879060 |
| C | -3.65781823 | 0.37299238  | -3.44308996 |
| C | -4.16503238 | 1.46882862  | -4.42078276 |
| H | 0.94436917  | -3.53244428 | 2.16475405  |
| H | 3.23276708  | -3.06128552 | 1.73401969  |
| H | -1.19966585 | 4.05831284  | -1.17990994 |
| H | -3.21369745 | 2.87956513  | -1.72182345 |
| H | -3.42908490 | -2.77748561 | 3.96392474  |
| H | -4.66462078 | -4.23107741 | 2.37119143  |
| H | -3.66627732 | -4.77171142 | 0.16312715  |

|   |             |             |             |
|---|-------------|-------------|-------------|
| H | -0.11803136 | -1.16640417 | 3.24716280  |
| H | 3.62850260  | -0.17708614 | 2.12874044  |
| H | -2.78135181 | -0.69891512 | 4.69557430  |
| H | -2.13444422 | 0.27530416  | 3.35247275  |
| H | -1.27591204 | 0.22070586  | 4.90448587  |
| H | -1.46751758 | -2.89666248 | 5.40586633  |
| H | -0.02643556 | -1.88121042 | 5.62036960  |
| H | 0.03503083  | -3.30803847 | 4.56105185  |
| H | 6.08318474  | 1.66440892  | 2.03039217  |
| H | 4.58077993  | 1.93778427  | 2.93737594  |
| H | 4.55018885  | 1.92085797  | 1.16555894  |
| H | 5.08527124  | -1.78395871 | 3.41833061  |
| H | 4.90135075  | -0.22867707 | 4.25884588  |
| H | 6.40606108  | -0.60051376 | 3.39288396  |
| H | 7.27394553  | -0.12083073 | 1.13071408  |
| H | 8.15165034  | -1.17754108 | -0.93534454 |
| H | 6.63183423  | -2.42561325 | -2.44838838 |
| H | -0.57000578 | -3.23916032 | -1.20796088 |
| H | 2.98947593  | -3.06474721 | -1.67975140 |
| H | -2.86552932 | -5.18775328 | -1.81162162 |
| H | -1.72158330 | -4.44568509 | -2.94237901 |
| H | -2.93325443 | -3.43711758 | -2.12818892 |
| H | -1.02205286 | -6.12452063 | -0.23919626 |
| H | 0.39287697  | -5.11781687 | 0.13696831  |
| H | 0.09006633  | -5.62698876 | -1.53636698 |
| H | 3.07958769  | -1.10548927 | -3.14502003 |
| H | 2.95774041  | -2.57770955 | -4.12535438 |
| H | 4.52344529  | -1.74321657 | -3.98553189 |
| H | 5.43353474  | -4.14541311 | -3.21294863 |
| H | 3.79237649  | -4.80565885 | -3.20517893 |
| H | 4.77848262  | -4.86416755 | -1.72638459 |
| H | 3.70593160  | 4.92414323  | -1.46468804 |
| H | 3.90069882  | 5.78522027  | 0.85508807  |
| H | 2.17634889  | 5.19527337  | 2.54231006  |
| H | 1.00687188  | 2.63579038  | -2.69110014 |
| H | -3.64103961 | 1.14232513  | 1.68541185  |
| H | 3.99639520  | 3.23132818  | -2.97094757 |
| H | 2.98696656  | 2.27438064  | -4.07732493 |
| H | 3.26408529  | 1.70205433  | -2.42557779 |
| H | 0.62328613  | 5.09513569  | -3.18713901 |
| H | 1.43599700  | 4.25114542  | -4.52533185 |
| H | 2.36476338  | 5.30435791  | -3.44065820 |
| H | -6.40122942 | 0.37300816  | 2.78820741  |
| H | -4.92153964 | 0.69425685  | 3.70082684  |
| H | -5.00882008 | -0.72961924 | 2.64497004  |
| H | -4.75212232 | 3.28237872  | 0.93203927  |
| H | -4.88803606 | 3.05698629  | 2.68849144  |
| H | -6.28346669 | 2.72788115  | 1.63781944  |
| H | -7.11717412 | 0.08795568  | 0.77684646  |
| H | -7.80323094 | -0.65192970 | -1.48755710 |
| H | -6.21406303 | -0.52001201 | -3.38405660 |
| H | -0.63562790 | 2.79584922  | 1.95748633  |

|   |             |             |             |
|---|-------------|-------------|-------------|
| H | -2.64849071 | 0.64346207  | -3.12647958 |
| H | 1.03695129  | 4.20444085  | 4.10875044  |
| H | 1.21126816  | 2.50214950  | 3.61094026  |
| H | -0.30186549 | 3.06989716  | 4.34577579  |
| H | -1.82516118 | 4.69574842  | 3.05645821  |
| H | -1.47775456 | 5.10002036  | 1.35917144  |
| H | -0.48579744 | 5.79232871  | 2.65336132  |
| H | -3.07036710 | -1.73139891 | -3.50269462 |
| H | -2.84964993 | -0.87460044 | -5.03243084 |
| H | -4.48078237 | -1.36636203 | -4.53403080 |
| H | -4.24676756 | 2.45111890  | -3.93396984 |
| H | -5.15513001 | 1.21808681  | -4.82349799 |
| H | -3.47175542 | 1.56606298  | -5.26578449 |
| O | 1.46294938  | 0.72948742  | 1.47179696  |
| O | 0.13160352  | 0.63969512  | 1.86467909  |
| O | -0.64201294 | 0.22523424  | -2.29052088 |
| O | -0.78470600 | -1.23138657 | -1.82661008 |

## Peroxo Complex with adsorbed ozone group

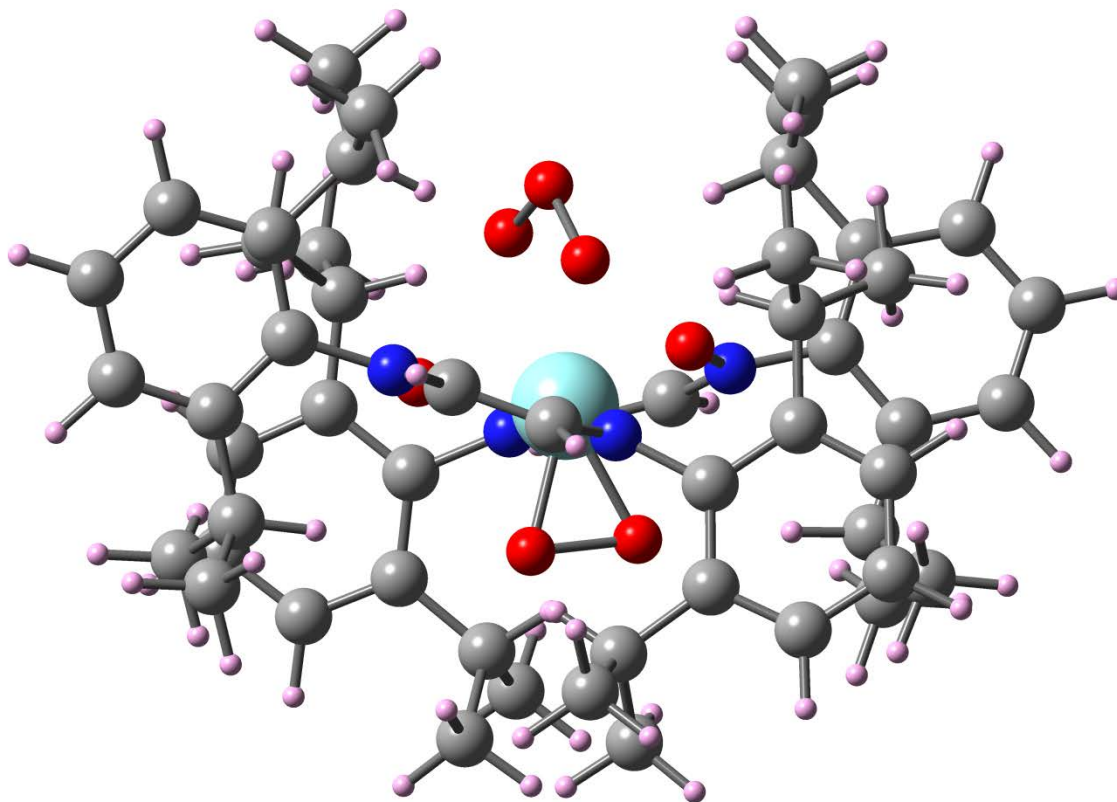

Fig. S92: NCCNO Peroxo Complex with adsorbed ozone group

| SCF          | $E_{ZP}$     | H            | G            |
|--------------|--------------|--------------|--------------|
| -2816.555122 | -2815.398443 | -2815.325323 | -2815.513318 |

|    |             |             |             |
|----|-------------|-------------|-------------|
| Zr | 0.08441568  | -0.09566736 | 0.00477697  |
| O  | -2.12990585 | 0.19748422  | -0.36612528 |
| O  | 1.98648116  | -0.67384896 | -0.70424286 |
| O  | -0.07042493 | 0.72983498  | -2.18054229 |
| N  | 0.05503583  | -2.23377856 | 0.81716300  |
| N  | 2.89695416  | -1.59673036 | -0.20819967 |
| N  | -0.03494176 | 2.43883097  | -0.13768389 |
| N  | -2.85142134 | 1.25115482  | -0.75462157 |
| C  | 1.17283454  | -3.00442489 | 0.88486846  |
| C  | 2.47303268  | -2.71028533 | 0.44957187  |
| C  | -1.14526644 | 3.06589349  | -0.41233930 |
| C  | -2.42928341 | 2.50527617  | -0.79454533 |
| C  | -1.10662298 | -2.79164084 | 1.51646394  |
| C  | -1.21553078 | -2.62315398 | 2.93022397  |
| C  | -2.34190329 | -3.17001404 | 3.58119769  |
| C  | -3.33031662 | -3.87060446 | 2.87403373  |

|   |             |             |             |
|---|-------------|-------------|-------------|
| C | -3.18983653 | -4.05692382 | 1.49228149  |
| C | -2.07951474 | -3.53665635 | 0.79175647  |
| C | -0.70634981 | -0.89889038 | 4.75855327  |
| C | -0.12919073 | -1.94569642 | 3.77474484  |
| C | 0.69224701  | -3.01507201 | 4.54883749  |
| C | 4.94957916  | 1.21136369  | 2.05056775  |
| C | 4.61023313  | -0.26999887 | 1.75096724  |
| C | 5.17148503  | -1.19684463 | 2.86318261  |
| C | 4.27901087  | -1.35608684 | -0.56863616 |
| C | 5.11852903  | -0.71051435 | 0.37450481  |
| C | 6.46411912  | -0.50067944 | 0.00444965  |
| C | 6.93704218  | -0.89858513 | -1.25659513 |
| C | 6.07415661  | -1.51441239 | -2.17807551 |
| C | 4.72251902  | -1.75525081 | -1.85479974 |
| C | -3.15608912 | -3.36149656 | -1.51752779 |
| C | -1.93732510 | -3.85417507 | -0.69885383 |
| C | -1.70510514 | -5.37372860 | -0.91818195 |
| C | 3.58582120  | -1.49870864 | -4.11025717 |
| C | 3.78639591  | -2.41234594 | -2.87274816 |
| C | 4.29562670  | -3.81543172 | -3.29255569 |
| C | 1.06635269  | 3.27509171  | 0.33912346  |
| C | 2.18495772  | 3.48408290  | -0.51683930 |
| C | 3.21707823  | 4.32549892  | -0.05692606 |
| C | 3.15544769  | 4.93262950  | 1.20673453  |
| C | 2.05031017  | 4.70124019  | 2.03572062  |
| C | 0.98161701  | 3.87297711  | 1.63005511  |
| C | 3.63687791  | 2.42264088  | -2.35158256 |
| C | 2.23321222  | 2.92260244  | -1.93948088 |
| C | 1.71428262  | 3.98488509  | -2.94887678 |
| C | -5.13576724 | -0.36650943 | 2.19525402  |
| C | -4.80451698 | 0.92666173  | 1.40685742  |
| C | -5.50191719 | 2.15988098  | 2.04100046  |
| C | -4.24536137 | 0.93745077  | -1.12426509 |
| C | -5.17895830 | 0.78539953  | -0.07195847 |
| C | -6.50915698 | 0.50277006  | -0.44578747 |
| C | -6.86906450 | 0.37145510  | -1.79680328 |
| C | -5.90537320 | 0.51035427  | -2.80781907 |
| C | -4.55758079 | 0.79015405  | -2.49623803 |
| C | 0.34564118  | 3.05153330  | 3.95028112  |
| C | -0.17323911 | 3.63926227  | 2.61237902  |
| C | -0.98078359 | 4.94228303  | 2.85438101  |
| C | -3.47389894 | -0.35904577 | -4.49318462 |
| C | -3.51734568 | 0.91782802  | -3.61472965 |
| C | -3.78808741 | 2.17522570  | -4.48382296 |
| H | 1.07628863  | -3.97486751 | 1.37242479  |
| H | 3.25702939  | -3.42754399 | 0.66178108  |
| H | -1.17099971 | 4.15728010  | -0.35184914 |
| H | -3.18532228 | 3.21414769  | -1.11143137 |
| H | -2.43970686 | -3.05065917 | 4.65716648  |
| H | -4.19072937 | -4.28137982 | 3.39802587  |
| H | -3.93920906 | -4.62707047 | 0.94825788  |
| H | 0.54850904  | -1.40685869 | 3.10928312  |

|   |             |             |             |
|---|-------------|-------------|-------------|
| H | 3.51837476  | -0.35194700 | 1.76638914  |
| H | -1.36761919 | -1.35378621 | 5.50962931  |
| H | -1.25779995 | -0.13170626 | 4.20671561  |
| H | 0.11444587  | -0.40431690 | 5.29552526  |
| H | 0.05678670  | -3.56968568 | 5.25308770  |
| H | 1.49534511  | -2.53325144 | 5.12309031  |
| H | 1.15234785  | -3.74410526 | 3.86889433  |
| H | 6.03349743  | 1.37995834  | 2.11260251  |
| H | 4.50839191  | 1.50376709  | 3.01173261  |
| H | 4.53894692  | 1.87469816  | 1.28110463  |
| H | 4.88944554  | -2.24400932 | 2.69332079  |
| H | 4.77723951  | -0.89397050 | 3.84186816  |
| H | 6.26805107  | -1.14548692 | 2.90663979  |
| H | 7.14163470  | -0.01602614 | 0.70246680  |
| H | 7.97710022  | -0.72410850 | -1.52330852 |
| H | 6.45264079  | -1.80910313 | -3.15381002 |
| H | -1.05939185 | -3.33346414 | -1.08360370 |
| H | 2.80223380  | -2.53883520 | -2.41015078 |
| H | -4.07989761 | -3.87854928 | -1.22301072 |
| H | -2.99083091 | -3.55057424 | -2.58670141 |
| H | -3.30524596 | -2.28480525 | -1.37733880 |
| H | -2.56116739 | -5.96610549 | -0.56769838 |
| H | -0.81441120 | -5.72175017 | -0.37854034 |
| H | -1.56104745 | -5.58511306 | -1.98646813 |
| H | 3.16885612  | -0.53075638 | -3.81111721 |
| H | 2.88724536  | -1.96710563 | -4.81584482 |
| H | 4.53363934  | -1.32135418 | -4.63663071 |
| H | 5.26632441  | -3.75768740 | -3.80261365 |
| H | 3.58226992  | -4.28443226 | -3.98291337 |
| H | 4.41177478  | -4.47478664 | -2.42254373 |
| H | 4.07308162  | 4.51168893  | -0.69866297 |
| H | 3.96338440  | 5.57901212  | 1.54155536  |
| H | 2.01416643  | 5.16184579  | 3.01947599  |
| H | 1.55588120  | 2.06724698  | -2.00456064 |
| H | -3.72245335 | 1.07413219  | 1.49292213  |
| H | 4.36840855  | 3.23945570  | -2.41836228 |
| H | 3.58251915  | 1.95162465  | -3.34167485 |
| H | 4.01378967  | 1.67504398  | -1.64459663 |
| H | 0.69370057  | 4.30810128  | -2.70325318 |
| H | 1.69898594  | 3.56599188  | -3.96347507 |
| H | 2.35842041  | 4.87520033  | -2.95258948 |
| H | -6.21423718 | -0.57447752 | 2.19419061  |
| H | -4.81397130 | -0.25968137 | 3.23868077  |
| H | -4.61542781 | -1.23259064 | 1.77293130  |
| H | -5.24773122 | 3.08703124  | 1.50990224  |
| H | -5.18986293 | 2.27048529  | 3.08724455  |
| H | -6.59446538 | 2.05311686  | 2.02542782  |
| H | -7.26438059 | 0.38138957  | 0.32559935  |
| H | -7.90075741 | 0.15306421  | -2.06147576 |
| H | -6.19678073 | 0.39078694  | -3.84748935 |
| H | -0.84182706 | 2.87780357  | 2.20194639  |
| H | -2.52151643 | 1.02884358  | -3.17363952 |



|   |             |             |             |
|---|-------------|-------------|-------------|
| H | 1.01228915  | 3.75032796  | 4.47400095  |
| H | 0.88237361  | 2.11729847  | 3.76014578  |
| H | -0.50049744 | 2.83166890  | 4.61504287  |
| H | -1.81900096 | 4.74844681  | 3.53737378  |
| H | -1.38945178 | 5.35147353  | 1.91944039  |
| H | -0.35462189 | 5.72241196  | 3.30763785  |
| H | -3.26994474 | -1.24756484 | -3.88609670 |
| H | -2.67368460 | -0.26903108 | -5.23800563 |
| H | -4.41932855 | -0.51535562 | -5.02932367 |
| H | -3.77712437 | 3.09468976  | -3.88305172 |
| H | -4.76448925 | 2.11349200  | -4.98210895 |
| H | -3.01784463 | 2.26871154  | -5.25969843 |
| O | 1.06120484  | 0.46728812  | 1.71022337  |
| O | -0.47235514 | 0.55735523  | 1.86670413  |
| O | -0.25375668 | -0.47854227 | -2.94238907 |
| O | -0.40984323 | -1.53326671 | -2.05924560 |

## 7. NCCNO Singlet Transition States

## Spiro Bisperoxo Complex to Oxo Peroxo Complex (conformation 1 lower energy)

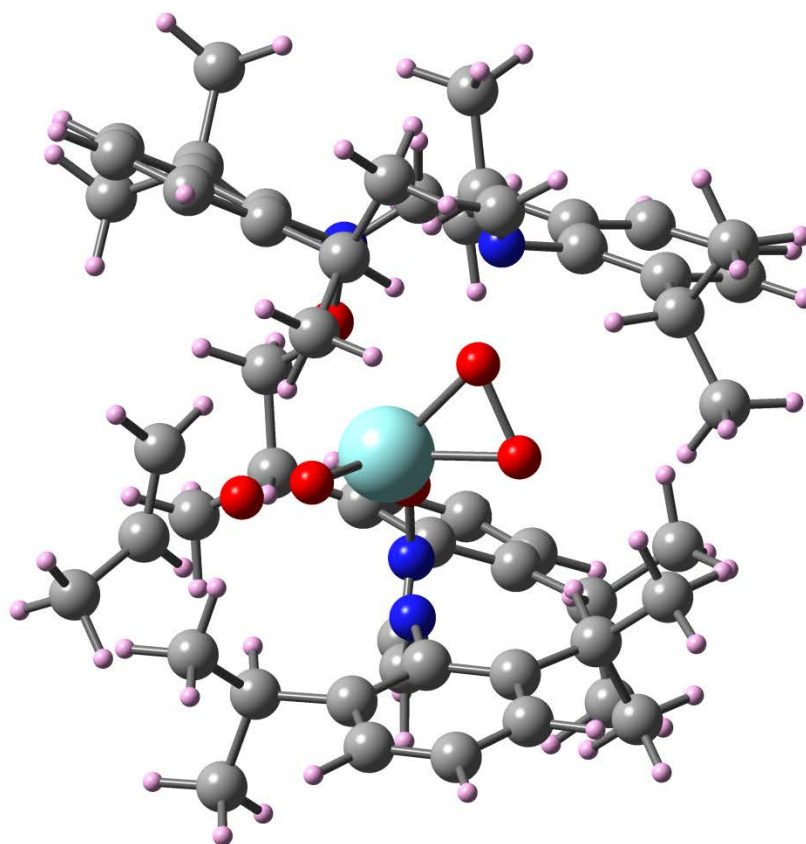

Fig. S93: NCCNO Spiro Bisperoxo Complex to Oxo Peroxo Complex (conformation 1 lower energy)

| SCF          | $E_{ZP}$     | H            | G            | imag freq<br>( $\text{cm}^{-1}$ ) |
|--------------|--------------|--------------|--------------|-----------------------------------|
| -2859.256339 | -2858.021043 | -2857.944435 | -2858.135973 | -474                              |

|    |             |             |             |
|----|-------------|-------------|-------------|
| Zr | 1.21804309  | 0.18865001  | -0.27325802 |
| O  | -0.37918303 | -0.97328107 | 0.92472907  |
| O  | -0.14053201 | 1.97503715  | 0.14966101  |
| O  | 2.99095123  | 0.89394207  | -0.15792301 |
| N  | -2.67043721 | 1.10842709  | -1.38814210 |
| N  | -0.27644102 | 2.97101623  | -0.77273606 |
| N  | 2.28903618  | -1.96830215 | 0.29906502  |
| N  | -0.41045603 | -2.06247816 | 1.69917913  |
| C  | -2.00445015 | 1.85286514  | -2.21608617 |
| C  | -1.06109308 | 2.89569422  | -1.82495514 |
| C  | 1.92457515  | -2.79166422 | 1.24449309  |
| C  | 0.64641005  | -2.82944322 | 1.93147515  |
| C  | -3.65364528 | 0.17786401  | -1.82797414 |

|   |             |             |             |
|---|-------------|-------------|-------------|
| C | -3.46808826 | -0.71619206 | -2.93260823 |
| C | -4.53983635 | -1.57310412 | -3.26603925 |
| C | -5.74296446 | -1.57193912 | -2.54573020 |
| C | -5.89226643 | -0.72086806 | -1.43699911 |
| C | -4.85861837 | 0.15071501  | -1.05263108 |
| C | -1.66026313 | -2.29811117 | -3.80779529 |
| C | -2.16168117 | -0.83402106 | -3.73329428 |
| C | -2.32798618 | -0.26285402 | -5.16850040 |
| C | 3.63706228  | 3.29429325  | -2.31016718 |
| C | 2.13733217  | 3.65872528  | -2.45489019 |
| C | 1.87721714  | 4.40119534  | -3.79536629 |
| C | 0.49643004  | 4.19806932  | -0.49712104 |
| C | 1.63838913  | 4.50486834  | -1.27736610 |
| C | 2.32303418  | 5.69719645  | -0.94758007 |
| C | 1.89364014  | 6.52451851  | 0.09790501  |
| C | 0.75315006  | 6.18684845  | 0.84576806  |
| C | 0.02819500  | 5.01235238  | 0.56746204  |
| C | -5.87687346 | 0.53818404  | 1.27909210  |
| C | -5.03599439 | 1.11864108  | 0.11912701  |
| C | -5.64579244 | 2.46076219  | -0.37407003 |
| C | -1.09054908 | 4.86833937  | 2.87062022  |
| C | -1.25821010 | 4.69595436  | 1.34077510  |
| C | -2.42643819 | 5.57902842  | 0.82036906  |
| C | 3.56972827  | -2.28506917 | -0.35722003 |
| C | 4.79191336  | -1.89411914 | 0.25004202  |
| C | 5.98787045  | -2.24515217 | -0.41252603 |
| C | 5.97644043  | -2.95170622 | -1.62209112 |
| C | 4.75348436  | -3.33244225 | -2.19344617 |
| C | 3.52618127  | -3.01065823 | -1.57893112 |
| C | 5.73688543  | 0.13979301  | 1.46175511  |
| C | 4.87520237  | -1.14203709 | 1.58180112  |
| C | 5.41907343  | -2.08013416 | 2.69490920  |
| C | -2.85602322 | -4.48153234 | -0.65789605 |
| C | -1.82262514 | -4.37349033 | 0.49355104  |
| C | -1.36361810 | -5.78542544 | 0.94742807  |
| C | -1.73350913 | -2.43606519 | 2.23584617  |
| C | -2.38198118 | -3.56550627 | 1.67150113  |
| C | -3.62814628 | -3.92547430 | 2.22644217  |
| C | -4.20430132 | -3.17874724 | 3.26474325  |
| C | -3.55244727 | -2.04130915 | 3.76466129  |
| C | -2.29994518 | -1.63761412 | 3.25865725  |
| C | 2.16440116  | -3.34853526 | -3.72401828 |
| C | 2.21438417  | -3.51838927 | -2.18809717 |
| C | 1.97686315  | -5.00242338 | -1.79140213 |
| C | -2.40881019 | 0.88519307  | 3.35807625  |
| C | -1.62702412 | -0.37912303 | 3.80478829  |
| C | -1.46590511 | -0.42561303 | 5.34518838  |
| H | -2.19553917 | 1.85239514  | -3.29457125 |
| H | -0.98820807 | 3.74811329  | -2.49470119 |
| H | 2.59355520  | -3.60528828 | 1.53711712  |
| H | 0.48387804  | -3.63623428 | 2.63531820  |
| H | -4.42479534 | -2.25663617 | -4.10328831 |

|   |             |             |             |
|---|-------------|-------------|-------------|
| H | -6.55338249 | -2.23592617 | -2.83814721 |
| H | -6.81859252 | -0.73926406 | -0.87010507 |
| H | -1.36254610 | -0.27798202 | -3.23457725 |
| H | 1.59778012  | 2.70669221  | -2.48828119 |
| H | -2.35085718 | -2.94885922 | -4.36197833 |
| H | -1.51904411 | -2.71032621 | -2.80247921 |
| H | -0.68803405 | -2.31794018 | -4.31144633 |
| H | -3.07352623 | -0.83455806 | -5.73834141 |
| H | -1.37227811 | -0.31594502 | -5.70543643 |
| H | -2.65638620 | 0.78548406  | -5.16117239 |
| H | 4.28001732  | 4.18531032  | -2.28766717 |
| H | 3.94444430  | 2.68040720  | -3.16700724 |
| H | 3.79800929  | 2.70244621  | -1.40294911 |
| H | 0.81475406  | 4.64932735  | -3.93239730 |
| H | 2.18691717  | 3.76718829  | -4.63566535 |
| H | 2.44629419  | 5.33927843  | -3.84931129 |
| H | 3.20783425  | 5.96977745  | -1.51535311 |
| H | 2.44382819  | 7.43344357  | 0.32993003  |
| H | 0.42527603  | 6.84258151  | 1.64758813  |
| H | -4.03120231 | 1.33975110  | 0.49772104  |
| H | -1.52278612 | 3.64864428  | 1.16515309  |
| H | -6.92759955 | 0.39119103  | 0.99463407  |
| H | -5.86614444 | 1.23343709  | 2.12961316  |
| H | -5.47568444 | -0.42487103 | 1.61937713  |
| H | -6.65248850 | 2.30465518  | -0.78538006 |
| H | -5.02585638 | 2.91231022  | -1.15834809 |
| H | -5.72307243 | 3.17782824  | 0.45505403  |
| H | -0.25745402 | 4.26496833  | 3.24873725  |
| H | -2.00750115 | 4.54965935  | 3.38411326  |
| H | -0.90729607 | 5.91442345  | 3.14759924  |
| H | -2.21876917 | 6.64426752  | 0.98791307  |
| H | -3.35842626 | 5.32646440  | 1.34356610  |
| H | -2.59170620 | 5.43374641  | -0.25506802 |
| H | 6.93722951  | -1.95079215 | 0.02643100  |
| H | 6.91179651  | -3.20537724 | -2.11559916 |
| H | 4.75011136  | -3.88600630 | -3.12775624 |
| H | 3.87651330  | -0.79222806 | 1.85758914  |
| H | -0.95070407 | -3.85260329 | 0.08159701  |
| H | 6.77715154  | -0.07998101 | 1.18382909  |
| H | 5.75220644  | 0.66852405  | 2.42432919  |
| H | 5.28673340  | 0.80189706  | 0.71659206  |
| H | 4.78149137  | -2.96585923 | 2.83349122  |
| H | 5.47413242  | -1.54687112 | 3.65379028  |
| H | 6.42959348  | -2.43754019 | 2.45442219  |
| H | -3.73013629 | -5.07587839 | -0.36288503 |
| H | -2.39640218 | -4.97557938 | -1.52323312 |
| H | -3.20709124 | -3.49372226 | -0.97591107 |
| H | -0.59518705 | -5.73608146 | 1.73036013  |
| H | -0.94641207 | -6.33978951 | 0.09744601  |
| H | -2.20709917 | -6.36285947 | 1.34715110  |
| H | -4.15822032 | -4.78537536 | 1.82771814  |
| H | -5.16694939 | -3.47503426 | 3.67384628  |

|   |             |             |             |
|---|-------------|-------------|-------------|
| H | -4.01699731 | -1.45977211 | 4.55581335  |
| H | 1.39161711  | -2.91539222 | -1.79117814 |
| H | -0.62838205 | -0.30112802 | 3.36876126  |
| H | 2.93709123  | -3.93802730 | -4.23540232 |
| H | 2.28252317  | -2.29210518 | -3.98429030 |
| H | 1.19061909  | -3.68495428 | -4.10265631 |
| H | 1.02037308  | -5.35893043 | -2.19872517 |
| H | 1.95636615  | -5.13631339 | -0.70016105 |
| H | 2.77451621  | -5.64595442 | -2.18670617 |
| H | -2.41629419 | 0.96748007  | 2.26563517  |
| H | -1.93269215 | 1.78399013  | 3.76957329  |
| H | -3.44669126 | 0.85651407  | 3.71556228  |
| H | -0.92528207 | -1.32503310 | 5.66830443  |
| H | -2.43733718 | -0.41527303 | 5.85620146  |
| H | -0.90142107 | 0.45145003  | 5.68482942  |
| O | 0.64926105  | 0.70988106  | -2.22296917 |
| O | 1.00953108  | -0.78036906 | -2.11099016 |
| C | 1.89888515  | 0.78805406  | 3.81767529  |
| H | 1.32194210  | -0.12056001 | 3.98423430  |
| C | 1.38412510  | 1.78417814  | 3.00489223  |
| H | 0.36207903  | 1.76189014  | 2.64208120  |
| O | 2.28971217  | 0.87232207  | 1.60112112  |
| H | 1.89287514  | 2.74024921  | 2.92066523  |
| C | 3.23993525  | 0.87246507  | 4.49619934  |
| H | 3.84254929  | -0.02375200 | 4.30175533  |
| H | 3.80294029  | 1.74192813  | 4.14028331  |
| H | 3.12554624  | 0.95577607  | 5.58950740  |

## Spiro Bisperoxo Complex to Oxo Peroxo Complex (conformation 2 higher energy)

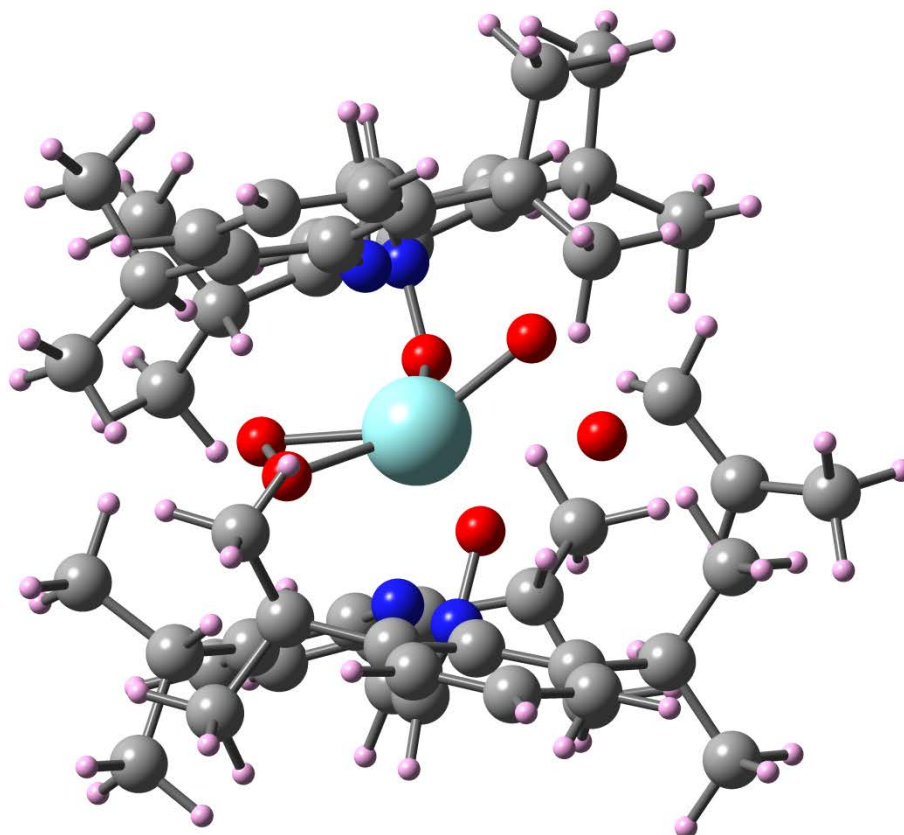

Fig. S94: NCCNO Spiro Bisperoxo Complex to Oxo Peroxo Complex (conformation 2 higher energy)

| SCF            | E <sub>ZP</sub> | H            | G            | imag freq (cm <sup>-1</sup> ) |
|----------------|-----------------|--------------|--------------|-------------------------------|
| -2859.24779765 | -2858.012526    | -2857.937259 | -2858.125106 | -370                          |

|    |             |             |             |
|----|-------------|-------------|-------------|
| Zr | -0.12095300 | 0.10226300  | 0.11251900  |
| O  | 2.07040200  | 0.16527700  | 0.43096200  |
| O  | -2.18504800 | -0.65418200 | 0.64374200  |
| O  | -0.29809700 | 1.07011100  | 1.87949400  |
| N  | -0.04912800 | -2.27536100 | -0.68623100 |
| N  | -2.97647300 | -1.55329100 | 0.05752500  |
| N  | 0.08947700  | 2.46815900  | -0.02716400 |
| N  | 2.91505500  | 1.23922400  | 0.42071200  |
| C  | -1.16203000 | -2.91567600 | -0.97455400 |
| C  | -2.52582700 | -2.58921300 | -0.64133100 |
| C  | 1.23810100  | 3.09733600  | 0.19785000  |
| C  | 2.53187300  | 2.52466800  | 0.36080500  |
| C  | 1.14559800  | -2.85226100 | -1.30219900 |
| C  | 1.25903500  | -2.90418100 | -2.72556900 |
| C  | 2.40042100  | -3.53505500 | -3.26524900 |

|   |             |             |             |
|---|-------------|-------------|-------------|
| C | 3.39610500  | -4.08564200 | -2.44661000 |
| C | 3.26976600  | -4.00863200 | -1.05194200 |
| C | 2.14838900  | -3.39758300 | -0.45630100 |
| C | 0.88548600  | -1.28877700 | -4.66614700 |
| C | 0.23055400  | -2.30814600 | -3.69919200 |
| C | -0.49275900 | -3.42414700 | -4.50278200 |
| C | -4.85862500 | 1.21795400  | -2.39254500 |
| C | -4.50346100 | -0.26215700 | -2.10060600 |
| C | -4.91399000 | -1.16917000 | -3.29194700 |
| C | -4.41827900 | -1.34805200 | 0.25257100  |
| C | -5.15115200 | -0.74466400 | -0.79774300 |
| C | -6.53855300 | -0.58870800 | -0.58968600 |
| C | -7.14135900 | -0.99028100 | 0.61259000  |
| C | -6.36939700 | -1.54682100 | 1.64525300  |
| C | -4.98023400 | -1.73548400 | 1.49190900  |
| C | 3.28020900  | -3.16235900 | 1.83062700  |
| C | 1.96853000  | -3.44228000 | 1.06086100  |
| C | 1.37077200  | -4.81725600 | 1.47402800  |
| C | -4.03853900 | -1.23617900 | 3.78062500  |
| C | -4.14063000 | -2.29073200 | 2.64584200  |
| C | -4.69701200 | -3.63616600 | 3.17662200  |
| C | -1.05742300 | 3.33539600  | -0.32748900 |
| C | -1.84699500 | 3.89255000  | 0.71857900  |
| C | -2.95619400 | 4.68988300  | 0.35506700  |
| C | -3.26016800 | 4.95824300  | -0.98523100 |
| C | -2.43325400 | 4.44720800  | -1.99688200 |
| C | -1.32078000 | 3.63464500  | -1.69803300 |
| C | -2.71380000 | 3.06377200  | 2.96945400  |
| C | -1.53556500 | 3.72199900  | 2.20929600  |
| C | -1.15098200 | 5.08259800  | 2.85027100  |
| C | 4.72082800  | -0.46481300 | -3.05257900 |
| C | 4.27411800  | 0.65676300  | -2.08611300 |
| C | 4.47846400  | 2.04844000  | -2.74903800 |
| C | 4.33877600  | 0.90420100  | 0.48062200  |
| C | 4.99990400  | 0.60189200  | -0.73712700 |
| C | 6.37736500  | 0.30914700  | -0.66231700 |
| C | 7.05434700  | 0.31797300  | 0.56871400  |
| C | 6.36782400  | 0.61893900  | 1.75473400  |
| C | 4.98728800  | 0.91331700  | 1.73925500  |
| C | -1.14772400 | 2.61201600  | -4.04672500 |
| C | -0.38852300 | 3.19550600  | -2.83185700 |
| C | 0.50919600  | 4.38707100  | -3.26799400 |
| C | 4.51848300  | 0.21514400  | 4.15321200  |
| C | 4.25886100  | 1.26281100  | 3.04140300  |
| C | 4.65988200  | 2.68083800  | 3.53239400  |
| H | -1.09432700 | -3.83084700 | -1.56718700 |
| H | -3.29394400 | -3.25690100 | -1.01126400 |
| H | 1.23702500  | 4.18808000  | 0.23473700  |
| H | 3.36020400  | 3.22125000  | 0.42431500  |
| H | 2.51189600  | -3.58624500 | -4.34524500 |
| H | 4.26223900  | -4.57023900 | -2.89126200 |
| H | 4.04135100  | -4.43975600 | -0.42055900 |

|   |             |             |             |
|---|-------------|-------------|-------------|
| H | -0.51062500 | -1.73764400 | -3.13358900 |
| H | -3.41273500 | -0.30245400 | -2.00570700 |
| H | 1.66633800  | -1.74813300 | -5.28736500 |
| H | 1.30865400  | -0.46146100 | -4.08968900 |
| H | 0.12201200  | -0.87449900 | -5.33855500 |
| H | 0.21312800  | -3.98544100 | -5.12969700 |
| H | -1.25019600 | -2.98275700 | -5.16413600 |
| H | -0.99541900 | -4.14943400 | -3.84745800 |
| H | -5.93319000 | 1.35374400  | -2.57554500 |
| H | -4.31857400 | 1.55598100  | -3.28511200 |
| H | -4.56233200 | 1.86760900  | -1.56161700 |
| H | -4.62764600 | -2.21639100 | -3.12432700 |
| H | -4.42084500 | -0.82688600 | -4.21054900 |
| H | -5.99942500 | -1.14151500 | -3.45833700 |
| H | -7.14476800 | -0.13478600 | -1.36846500 |
| H | -8.21173800 | -0.85697800 | 0.75058700  |
| H | -6.84683000 | -1.83259100 | 2.57843100  |
| H | 1.24238600  | -2.67024000 | 1.34003900  |
| H | -3.11806000 | -2.46712200 | 2.29406000  |
| H | 4.01838300  | -3.96185800 | 1.68560400  |
| H | 3.08003500  | -3.09897500 | 2.90823300  |
| H | 3.72744000  | -2.21705200 | 1.50342400  |
| H | 2.04709000  | -5.63450400 | 1.18986700  |
| H | 0.40328600  | -4.99558400 | 0.98673600  |
| H | 1.21691800  | -4.86822900 | 2.56034600  |
| H | -3.54967300 | -0.32662000 | 3.41595200  |
| H | -3.44010500 | -1.63354000 | 4.60973900  |
| H | -5.03137200 | -0.97295100 | 4.16960400  |
| H | -5.69422400 | -3.51720300 | 3.61972500  |
| H | -4.03464700 | -4.03228000 | 3.95728800  |
| H | -4.77055500 | -4.38628400 | 2.37819300  |
| H | -3.57893200 | 5.11254400  | 1.13976200  |
| H | -4.11938300 | 5.57521400  | -1.23943000 |
| H | -2.64981300 | 4.68509800  | -3.03502000 |
| H | -0.69352300 | 3.03498300  | 2.31701800  |
| H | 3.20094400  | 0.52185400  | -1.91164300 |
| H | -3.62998900 | 3.66868300  | 2.91708000  |
| H | -2.45281900 | 2.93663600  | 4.02913300  |
| H | -2.91994700 | 2.07226400  | 2.55232300  |
| H | -0.29764300 | 5.54359600  | 2.33375300  |
| H | -0.87402100 | 4.93822300  | 3.90378600  |
| H | -1.98402100 | 5.79830800  | 2.81784800  |
| H | 5.76258500  | -0.33729200 | -3.37708700 |
| H | 4.09151000  | -0.44582000 | -3.95082200 |
| H | 4.61592700  | -1.45270600 | -2.59168800 |
| H | 4.10978700  | 2.86078500  | -2.11077600 |
| H | 3.93175100  | 2.09477600  | -3.69938900 |
| H | 5.54194500  | 2.23196200  | -2.95481600 |
| H | 6.92343200  | 0.07285200  | -1.57058600 |
| H | 8.11744400  | 0.09100600  | 0.60208100  |
| H | 6.90466300  | 0.62097300  | 2.69946000  |
| H | 0.25105200  | 2.39005900  | -2.46435200 |



|   |             |             |             |
|---|-------------|-------------|-------------|
| H | 3.18109200  | 1.27273400  | 2.84568600  |
| H | -1.80013000 | 3.35132100  | -4.53278800 |
| H | -1.74467800 | 1.75287700  | -3.72577000 |
| H | -0.42656900 | 2.26215700  | -4.79796800 |
| H | 1.21255400  | 4.06736700  | -4.04954500 |
| H | 1.09332100  | 4.78193000  | -2.42543000 |
| H | -0.09363300 | 5.21306100  | -3.67086700 |
| H | 4.26944500  | -0.79734100 | 3.81513900  |
| H | 3.90317900  | 0.44239800  | 5.03334400  |
| H | 5.56803300  | 0.21627800  | 4.47454300  |
| H | 4.42882300  | 3.44840500  | 2.78291300  |
| H | 5.73546500  | 2.73405900  | 3.74660100  |
| H | 4.11662700  | 2.93273200  | 4.45245000  |
| O | -1.13043000 | 0.32128300  | -1.67958900 |
| O | 0.39071300  | 0.26262800  | -1.91828400 |
| C | 0.96908300  | -0.72561800 | 3.47669100  |
| H | 1.91847300  | -0.76134200 | 2.93556500  |
| C | 0.52183000  | -1.97999500 | 4.07275400  |
| H | 0.80259400  | -2.91460000 | 3.59697500  |
| O | -0.15742900 | -0.57851800 | 2.47026000  |
| H | 0.91547200  | 0.14767600  | 4.13595300  |
| C | -0.42545500 | -2.01969700 | 5.23603600  |
| H | -1.14697300 | -2.84440500 | 5.15289000  |
| H | 0.11275500  | -2.16737000 | 6.19191000  |
| H | -0.98349000 | -1.07901200 | 5.31951600  |

Oxo Peroxo Complex to Peroxo  $\eta^2$ -Ozone Complex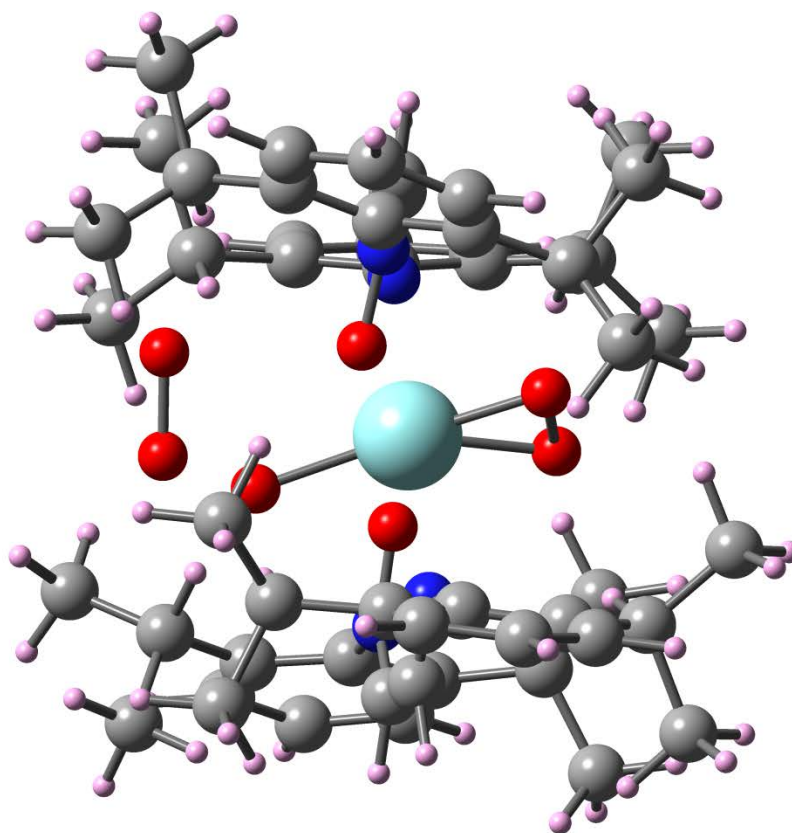Fig. S95: NCCNO Oxo Peroxo Complex to Peroxo  $\eta^2$ -Ozone Complex

| SCF          | $E_{ZP}$     | H            | G            | imag freq<br>( $\text{cm}^{-1}$ ) |
|--------------|--------------|--------------|--------------|-----------------------------------|
| -2816.533200 | -2815.376073 | -2815.303839 | -2815.486802 | -10                               |
| Zr           | 0.00400000   | 0.07795300   | 0.17920500   |                                   |
| O            | -2.23449000  | 0.23998800   | -0.05243200  |                                   |
| O            | 2.09214900   | -0.48590200  | -0.28197500  |                                   |
| O            | -0.43668000  | -0.30697000  | -1.87058500  |                                   |
| N            | 0.03411200   | -2.05522200  | 1.07259400   |                                   |
| N            | 2.92389900   | -1.27405500  | 0.41990900   |                                   |
| N            | -0.10623500  | 2.28652400   | -0.63622600  |                                   |
| N            | -2.97995300  | 1.14227500   | -0.70201100  |                                   |
| C            | 1.14787700   | -2.68981100  | 1.41701700   |                                   |
| C            | 2.49565000   | -2.29561800  | 1.17520000   |                                   |
| C            | -1.20501100  | 2.86206500   | -1.08112600  |                                   |
| C            | -2.53090800  | 2.31632300   | -1.15125800  |                                   |
| C            | -1.21419600  | -2.74459700  | 1.42158400   |                                   |
| C            | -1.79606200  | -2.51660000  | 2.69879000   |                                   |
| C            | -3.00157000  | -3.18861300  | 2.99565700   |                                   |
| C            | -3.59881600  | -4.05807400  | 2.07139200   |                                   |
| C            | -2.98485800  | -4.29093100  | 0.83127600   |                                   |
| C            | -1.77943500  | -3.64811600  | 0.47911700   |                                   |

|   |             |             |             |
|---|-------------|-------------|-------------|
| C | -2.09980400 | -0.64222700 | 4.42371100  |
| C | -1.12481500 | -1.65362200 | 3.77551000  |
| C | -0.47887900 | -2.55971000 | 4.86032400  |
| C | 4.67441200  | 2.11597700  | 2.23894300  |
| C | 4.29825700  | 0.61503500  | 2.19798300  |
| C | 4.59117500  | -0.05685600 | 3.56830400  |
| C | 4.36125500  | -1.05206200 | 0.22125400  |
| C | 5.02127400  | -0.13451400 | 1.07465500  |
| C | 6.41059500  | 0.02084000  | 0.88316200  |
| C | 7.09140700  | -0.70081300 | -0.11068800 |
| C | 6.39889200  | -1.59618800 | -0.94069300 |
| C | 5.00873800  | -1.79127000 | -0.79800100 |
| C | -2.06239600 | -4.09326100 | -2.03172600 |
| C | -1.08276400 | -3.98793900 | -0.84232900 |
| C | -0.26965900 | -5.30573300 | -0.70572900 |
| C | 4.51551100  | -2.47042100 | -3.19946800 |
| C | 4.26365800  | -2.77662900 | -1.70394500 |
| C | 4.64965700  | -4.24020200 | -1.36184900 |
| C | 1.08873100  | 3.14234000  | -0.62667300 |
| C | 1.97970700  | 3.09232100  | -1.73145500 |
| C | 3.10038100  | 3.94960200  | -1.70797400 |
| C | 3.32516700  | 4.82370700  | -0.63458300 |
| C | 2.42647400  | 4.85391400  | 0.44262700  |
| C | 1.29225300  | 4.01559500  | 0.47772300  |
| C | 2.97490700  | 1.35935200  | -3.32792700 |
| C | 1.73088000  | 2.20003800  | -2.95179100 |
| C | 1.25965400  | 3.05538000  | -4.16001900 |
| C | -5.29858800 | 1.09020800  | 2.68815300  |
| C | -4.84533800 | 1.88420500  | 1.43561800  |
| C | -5.35863700 | 3.34754600  | 1.49184700  |
| C | -4.40108700 | 0.79642300  | -0.87104000 |
| C | -5.29832200 | 1.18791500  | 0.14828900  |
| C | -6.66468800 | 0.90227000  | -0.06323300 |
| C | -7.09107300 | 0.24288600  | -1.22549300 |
| C | -6.16087700 | -0.16450500 | -2.19755000 |
| C | -4.78379400 | 0.09579000  | -2.04239600 |
| C | 1.05348500  | 3.93639400  | 3.02230500  |
| C | 0.32541400  | 4.09965400  | 1.66508300  |
| C | -0.47824900 | 5.42793000  | 1.62304900  |
| C | -4.18172100 | -1.64072200 | -3.83109200 |
| C | -3.75384000 | -0.35391100 | -3.08603100 |
| C | -3.48140000 | 0.76134700  | -4.13585900 |
| H | 1.05516100  | -3.63221300 | 1.95883600  |
| H | 3.28397300  | -2.89384100 | 1.61326900  |
| H | -1.14023500 | 3.88475200  | -1.45845900 |
| H | -3.29080700 | 2.93437300  | -1.61212300 |
| H | -3.46990200 | -3.03390900 | 3.96424400  |
| H | -4.52963800 | -4.56250400 | 2.32117600  |
| H | -3.44309200 | -4.98197400 | 0.12922200  |
| H | -0.33479600 | -1.05721200 | 3.31341700  |
| H | 3.21692500  | 0.56354900  | 2.03395600  |
| H | -2.93063700 | -1.13784500 | 4.94509900  |

|   |             |             |             |
|---|-------------|-------------|-------------|
| H | -2.50559900 | 0.03205200  | 3.66340500  |
| H | -1.56058700 | -0.02911300 | 5.15744700  |
| H | -1.23810500 | -3.15774100 | 5.38283500  |
| H | 0.04146400  | -1.94373400 | 5.60581700  |
| H | 0.25100000  | -3.25627500 | 4.42562100  |
| H | 5.73081700  | 2.26853000  | 2.49884200  |
| H | 4.06856000  | 2.62461200  | 2.99859900  |
| H | 4.48007200  | 2.60171900  | 1.27616600  |
| H | 4.27895900  | -1.10943200 | 3.57630800  |
| H | 4.04229400  | 0.46240900  | 4.36394700  |
| H | 5.66268300  | -0.01954700 | 3.80772100  |
| H | 6.96084200  | 0.71144400  | 1.51547700  |
| H | 8.16283100  | -0.56427800 | -0.23825400 |
| H | 6.93697500  | -2.14366800 | -1.70953700 |
| H | -0.37645900 | -3.19086100 | -1.09262400 |
| H | 3.18651300  | -2.65661000 | -1.55621800 |
| H | -2.73014400 | -4.96200100 | -1.94835500 |
| H | -1.49695000 | -4.19496300 | -2.96638500 |
| H | -2.67562000 | -3.19083200 | -2.10520500 |
| H | -0.92921100 | -6.15368100 | -0.47375200 |
| H | 0.48398800  | -5.24085400 | 0.08999900  |
| H | 0.25135800  | -5.52193900 | -1.64766100 |
| H | 4.22985300  | -1.43709300 | -3.41717300 |
| H | 3.89696400  | -3.12705300 | -3.82149300 |
| H | 5.56668100  | -2.61747900 | -3.48287400 |
| H | 5.72181400  | -4.41752500 | -1.52154100 |
| H | 4.09156200  | -4.93479500 | -2.00267600 |
| H | 4.42257900  | -4.48724700 | -0.31572700 |
| H | 3.79693500  | 3.93366000  | -2.54207900 |
| H | 4.19285300  | 5.47948200  | -0.63828000 |
| H | 2.60741600  | 5.53427000  | 1.27077100  |
| H | 0.92969300  | 1.49386400  | -2.71975700 |
| H | -3.75026900 | 1.91215500  | 1.46037800  |
| H | 3.81417800  | 1.98951200  | -3.65309100 |
| H | 2.72266400  | 0.67771800  | -4.14930500 |
| H | 3.29993600  | 0.75276600  | -2.47615600 |
| H | 0.34257400  | 3.61387200  | -3.92636300 |
| H | 1.05368800  | 2.40818400  | -5.02239100 |
| H | 2.02808400  | 3.78339000  | -4.45397200 |
| H | -6.39280300 | 1.05841300  | 2.77209200  |
| H | -4.90573100 | 1.56605300  | 3.59564400  |
| H | -4.92648800 | 0.05988500  | 2.65521600  |
| H | -5.00716500 | 3.93155700  | 0.63101600  |
| H | -5.00029600 | 3.83927600  | 2.40523000  |
| H | -6.45591200 | 3.38454400  | 1.49618400  |
| H | -7.39268000 | 1.18939400  | 0.69059000  |
| H | -8.14812700 | 0.03256200  | -1.37023800 |
| H | -6.50643700 | -0.69912500 | -3.07645000 |
| H | -0.37782200 | 3.26418900  | 1.60789300  |
| H | -2.81047700 | -0.56049200 | -2.56246700 |
| H | 1.79750600  | 4.72650700  | 3.19405700  |
| H | 1.54439700  | 2.95911700  | 3.06102300  |

|   |             |             |             |
|---|-------------|-------------|-------------|
| H | 0.32302800  | 3.97991100  | 3.84119300  |
| H | -1.19673600 | 5.46281600  | 2.45301600  |
| H | -1.03725200 | 5.53573500  | 0.68290800  |
| H | 0.18537300  | 6.29859000  | 1.71438500  |
| H | -4.51536300 | -2.42483300 | -3.14184500 |
| H | -3.32828500 | -2.02999900 | -4.39869700 |
| H | -4.99324400 | -1.44418200 | -4.54514000 |
| H | -3.08743000 | 1.67573100  | -3.67987900 |
| H | -4.40095500 | 1.01628300  | -4.68072400 |
| H | -2.73623300 | 0.40965400  | -4.85979900 |
| O | 0.97141700  | 0.73770700  | 1.86621100  |
| O | -0.55268900 | 0.92193300  | 1.97535700  |
| O | 0.33998200  | -0.95301100 | -2.94503800 |
| O | 1.18841200  | -1.94188900 | -2.44231600 |

Peroxo  $\eta^2$ -Ozone Complex to Peroxo  $\eta^3$ -Ozone Complex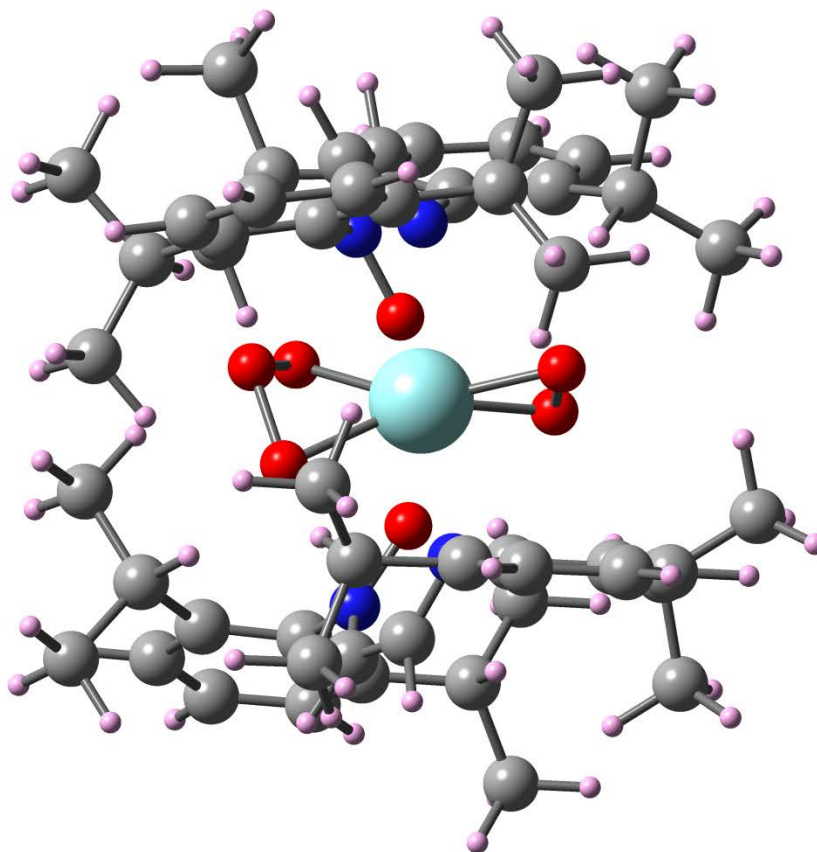Fig. S96: NCCNO Peroxo  $\eta^2$ -Ozone Complex to Peroxo  $\eta^3$ -Ozone Complex

| SCF          | $E_{ZP}$     | H            | G            | imag freq<br>( $\text{cm}^{-1}$ ) |
|--------------|--------------|--------------|--------------|-----------------------------------|
| -2816.550425 | -2815.392853 | -2815.320942 | -2815.502102 | -14                               |

|    |             |             |             |
|----|-------------|-------------|-------------|
| Zr | -0.19942402 | 0.09575101  | -0.34651903 |
| O  | 2.06395116  | 0.22909402  | 0.05513200  |
| O  | -2.41957119 | -0.64846305 | -0.20011902 |
| O  | -1.19818309 | 1.35038111  | 1.18170509  |
| N  | -0.19278401 | -2.39272218 | -0.47350804 |
| N  | -2.88514822 | -1.57593912 | 0.63297405  |
| N  | 0.36637503  | 2.56056120  | -0.64055505 |
| N  | 2.81473622  | 1.19509309  | 0.58870704  |
| C  | -1.02673108 | -3.13338724 | 0.20768802  |
| C  | -2.24249817 | -2.70900120 | 0.87025207  |
| C  | 1.38586111  | 3.13253324  | -0.05697600 |
| C  | 2.52452819  | 2.48631119  | 0.55808404  |
| C  | 0.90149607  | -3.10786124 | -1.13687909 |
| C  | 0.82424506  | -3.27536725 | -2.54691219 |
| C  | 1.86887314  | -3.97815031 | -3.17963024 |
| C  | 2.94766022  | -4.49733935 | -2.44662619 |

|   |             |             |             |
|---|-------------|-------------|-------------|
| C | 2.99408623  | -4.32629133 | -1.05620708 |
| C | 1.97662615  | -3.63070428 | -0.36596403 |
| C | -0.03116000 | -2.21543617 | -4.72203436 |
| C | -0.39696603 | -2.81375022 | -3.34523626 |
| C | -1.39885911 | -3.99216431 | -3.50323827 |
| C | -5.36497638 | -0.37667803 | -1.96033015 |
| C | -5.21675240 | -1.67867913 | -1.12672709 |
| C | -6.23628445 | -2.75322021 | -1.58065512 |
| C | -4.20306732 | -1.30348110 | 1.22759709  |
| C | -5.32867138 | -1.36445310 | 0.36871903  |
| C | -6.58287248 | -1.08660109 | 0.94829107  |
| C | -6.69533952 | -0.76799406 | 2.31197618  |
| C | -5.55340042 | -0.70736306 | 3.12401824  |
| C | -4.26708932 | -0.96281808 | 2.59962020  |
| C | 3.47422426  | -3.04150923 | 1.62392312  |
| C | 2.06687116  | -3.49167726 | 1.16095109  |
| C | 1.69369013  | -4.82717137 | 1.86423714  |
| C | -2.92643023 | 0.57394804  | 4.11730931  |
| C | -3.03476523 | -0.84611407 | 3.50487627  |
| C | -3.05874623 | -1.93205415 | 4.61354435  |
| C | -0.62339605 | 3.47067427  | -1.22790910 |
| C | -1.42058811 | 4.31249833  | -0.39574503 |
| C | -2.37032018 | 5.14449739  | -1.02984908 |
| C | -2.51523219 | 5.16788440  | -2.42223819 |
| C | -1.68359713 | 4.36778834  | -3.22002425 |
| C | -0.72168206 | 3.51168027  | -2.64971620 |
| C | -2.67218221 | 4.12907031  | 1.82217914  |
| C | -1.30951010 | 4.39099533  | 1.13377109  |
| C | -0.73092205 | 5.76348845  | 1.57509812  |
| C | 5.23921640  | -0.84744506 | -1.87845514 |
| C | 5.03480438  | 0.53250904  | -1.20035809 |
| C | 6.03803444  | 1.57919312  | -1.75354913 |
| C | 4.07579031  | 0.74120806  | 1.19904709  |
| C | 5.14150639  | 0.42032203  | 0.32428002  |
| C | 6.34367050  | -0.01030900 | 0.92251207  |
| C | 6.45949448  | -0.11488601 | 2.31824618  |
| C | 5.37373644  | 0.20373802  | 3.14846024  |
| C | 4.14347732  | 0.63750205  | 2.60897620  |
| C | -0.37839503 | 2.17665017  | -4.81763737 |
| C | 0.27269102  | 2.77688521  | -3.55136027 |
| C | 1.43312511  | 3.74047429  | -3.93164830 |
| C | 2.56613220  | -0.25188402 | 4.40492234  |
| C | 2.97104723  | 0.96934207  | 3.54003527  |
| C | 3.30699025  | 2.19293017  | 4.43448434  |
| H | -0.84688407 | -4.20889932 | 0.28165102  |
| H | -2.73639421 | -3.40532826 | 1.53556512  |
| H | 1.44512911  | 4.22304632  | -0.02302800 |
| H | 3.26530225  | 3.12782824  | 1.01973908  |
| H | 1.83446914  | -4.12228931 | -4.25552832 |
| H | 3.74365229  | -5.03642839 | -2.95551923 |
| H | 3.83087929  | -4.73549936 | -0.49650404 |
| H | -0.89113407 | -2.01066815 | -2.79192721 |

|   |             |             |             |
|---|-------------|-------------|-------------|
| H | -4.21417232 | -2.06976416 | -1.33509010 |
| H | 0.40925303  | -2.95759122 | -5.40311641 |
| H | 0.66687205  | -1.38254311 | -4.59080835 |
| H | -0.93683307 | -1.82203914 | -5.20162840 |
| H | -0.95295107 | -4.81850237 | -4.07436131 |
| H | -2.29743818 | -3.65478928 | -4.03733931 |
| H | -1.71344613 | -4.39287034 | -2.52887619 |
| H | -6.34870451 | 0.08530901  | -1.79999314 |
| H | -5.26153340 | -0.60002304 | -3.03006723 |
| H | -4.58844535 | 0.34470803  | -1.68679213 |
| H | -6.14264945 | -3.67465628 | -0.99105307 |
| H | -6.06580847 | -3.00327023 | -2.63566620 |
| H | -7.27100256 | -2.39840319 | -1.49136311 |
| H | -7.47537055 | -1.12087109 | 0.33024003  |
| H | -7.67359759 | -0.55938504 | 2.73861521  |
| H | -5.65395241 | -0.44387203 | 4.17313332  |
| H | 1.36456910  | -2.71813121 | 1.49065811  |
| H | -2.12509616 | -0.98576407 | 2.91274722  |
| H | 4.23587232  | -3.80629829 | 1.42290711  |
| H | 3.47093327  | -2.85887622 | 2.70605721  |
| H | 3.77346229  | -2.11605616 | 1.12319708  |
| H | 2.38576718  | -5.62810945 | 1.57122812  |
| H | 0.67910405  | -5.16170139 | 1.61130312  |
| H | 1.74929714  | -4.71199036 | 2.95514422  |
| H | -2.81396022 | 1.31832910  | 3.32302625  |
| H | -2.03460516 | 0.63059305  | 4.75459936  |
| H | -3.80132629 | 0.82723506  | 4.73172536  |
| H | -3.92421630 | -1.81101614 | 5.27912040  |
| H | -2.15022117 | -1.86115614 | 5.22512040  |
| H | -3.10373824 | -2.94582722 | 4.19122032  |
| H | -3.00279923 | 5.78095145  | -0.41657103 |
| H | -3.25771125 | 5.81536147  | -2.88321222 |
| H | -1.77442213 | 4.41194033  | -4.30113733 |
| H | -0.64616505 | 3.59792928  | 1.48474812  |
| H | 4.02571631  | 0.86331607  | -1.46766711 |
| H | -3.41875426 | 4.89195138  | 1.56386312  |
| H | -2.54755820 | 4.13827331  | 2.91363722  |
| H | -3.05543223 | 3.14569824  | 1.53292712  |
| H | 0.25485602  | 5.95695946  | 1.12866109  |
| H | -0.62295105 | 5.79671247  | 2.66793020  |
| H | -1.39104211 | 6.58907851  | 1.27765010  |
| H | 6.23887345  | -1.25293109 | -1.67145613 |
| H | 5.13307839  | -0.74772406 | -2.96607623 |
| H | 4.49258434  | -1.57099912 | -1.53391112 |
| H | 5.88620544  | 2.56549620  | -1.29542010 |
| H | 5.90993544  | 1.68406013  | -2.83840521 |
| H | 7.07710455  | 1.27814910  | -1.56620412 |
| H | 7.19073854  | -0.26494502 | 0.29150202  |
| H | 7.39588754  | -0.44869403 | 2.75876921  |
| H | 5.47678640  | 0.10865301  | 4.22589833  |
| H | 0.69247705  | 1.93305415  | -2.99814123 |
| H | 2.08911816  | 1.22071710  | 2.94371222  |



|   |             |             |             |
|---|-------------|-------------|-------------|
| H | -0.76141606 | 2.94586622  | -5.50366342 |
| H | -1.19309909 | 1.50320711  | -4.53311235 |
| H | 0.36748503  | 1.58702912  | -5.36687438 |
| H | 2.17489417  | 3.21332025  | -4.54702235 |
| H | 1.94643615  | 4.12932431  | -3.04034623 |
| H | 1.06319808  | 4.60174535  | -4.50549534 |
| H | 2.21473517  | -1.07312208 | 3.77192129  |
| H | 1.74180313  | 0.02851000  | 5.07259739  |
| H | 3.39919326  | -0.60992805 | 5.02448638  |
| H | 3.57593827  | 3.07349823  | 3.83528629  |
| H | 4.14762732  | 1.97890615  | 5.10773939  |
| H | 2.43870619  | 2.45495219  | 5.05215038  |
| O | -0.94658507 | 0.15534801  | -2.24882917 |
| O | 0.59879405  | -0.01020200 | -2.24135017 |
| O | -0.02212100 | 0.74649506  | 1.93872615  |
| O | -0.10666701 | -0.75637106 | 1.67438513  |

Peroxo  $\eta^3$ -Ozone Complex to Spiro Bisperoxo Complex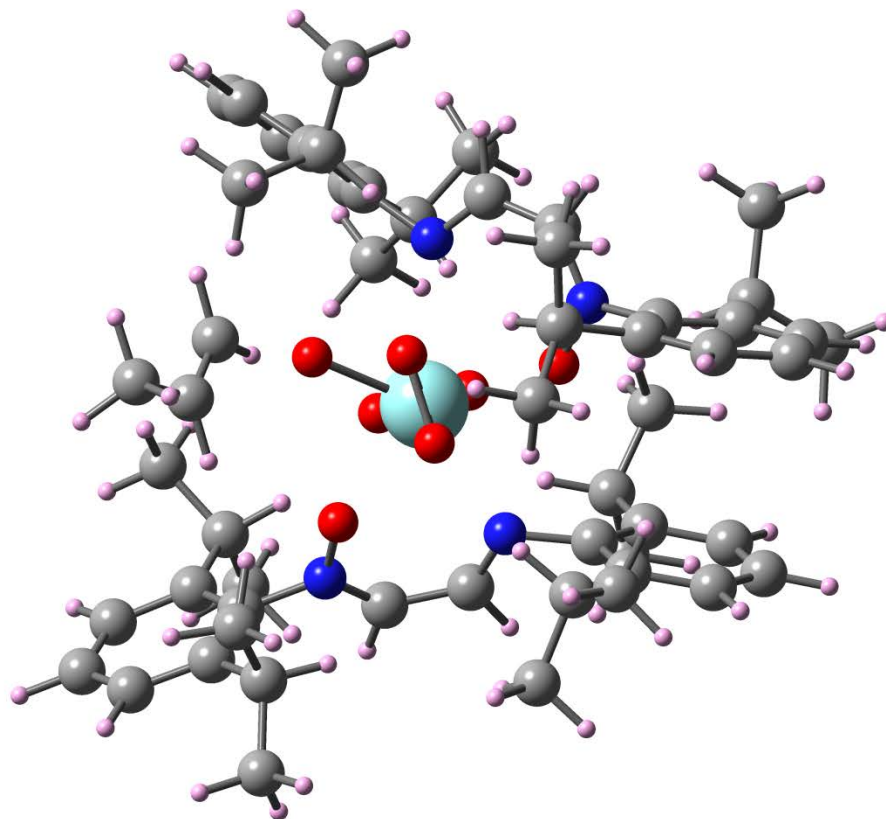Fig. S97: NCCNO Peroxo  $\eta^3$ -Ozone Complex to Spiro Bisperoxo Complex

| SCF          | $E_{ZP}$     | H            | G            | imag freq<br>( $\text{cm}^{-1}$ ) |
|--------------|--------------|--------------|--------------|-----------------------------------|
| -2934.421423 | -2933.182058 | -2933.104869 | -2933.295695 | -335                              |

|    |             |             |             |
|----|-------------|-------------|-------------|
| Zr | 0.26242000  | 0.20053300  | -0.09512900 |
| O  | -2.05048600 | 0.04046400  | 0.15919800  |
| O  | 2.14003900  | -1.10028900 | -0.73441600 |
| O  | 1.35621800  | 1.55141900  | -1.40505600 |
| N  | 0.01773200  | -2.21402100 | 0.78167200  |
| N  | 2.92724100  | -1.86242200 | 0.04305100  |
| N  | -0.70195100 | 2.68480400  | 0.37201700  |
| N  | -3.02767400 | 0.80935000  | -0.33283000 |
| C  | 1.05492200  | -2.82547500 | 1.30867400  |
| C  | 2.44563400  | -2.60602900 | 1.02605700  |
| C  | -1.93178500 | 3.00584600  | 0.07534500  |
| C  | -3.00300600 | 2.12952300  | -0.34216800 |
| C  | -1.25643100 | -2.84885700 | 1.11704400  |
| C  | -1.71955600 | -2.88947000 | 2.46303000  |
| C  | -2.89585000 | -3.62536200 | 2.72770400  |
| C  | -3.58677700 | -4.29485900 | 1.70983000  |

|   |             |             |             |
|---|-------------|-------------|-------------|
| C | -3.11514700 | -4.23129900 | 0.38866200  |
| C | -1.94536800 | -3.51690000 | 0.06357600  |
| C | -1.96067500 | -1.10397800 | 4.25597200  |
| C | -1.02697600 | -2.17129400 | 3.62971000  |
| C | -0.54225100 | -3.17312700 | 4.71098300  |
| C | 5.50550300  | 0.79266900  | 2.10438400  |
| C | 4.85978000  | -0.60570000 | 1.92896400  |
| C | 5.22851100  | -1.50860000 | 3.13903800  |
| C | 4.35704000  | -1.86817200 | -0.28996800 |
| C | 5.27649800  | -1.27018800 | 0.60921300  |
| C | 6.63910500  | -1.31238500 | 0.24094800  |
| C | 7.04892500  | -1.89683100 | -0.96680700 |
| C | 6.10505600  | -2.46334200 | -1.83890700 |
| C | 4.73189200  | -2.46964400 | -1.51917900 |
| C | -2.46021100 | -3.72865500 | -2.44864100 |
| C | -1.37779500 | -3.55299600 | -1.35985300 |
| C | -0.32461300 | -4.69009100 | -1.49521300 |
| C | 3.45062200  | -2.13476000 | -3.68126900 |
| C | 3.71485400  | -3.08885100 | -2.48453800 |
| C | 4.15272900  | -4.49178600 | -2.97559200 |
| C | 0.17948700  | 3.82276500  | 0.60584400  |
| C | 0.43213100  | 4.74301600  | -0.45758000 |
| C | 1.31156900  | 5.81566600  | -0.19477900 |
| C | 1.90480800  | 5.98790900  | 1.06390700  |
| C | 1.61410100  | 5.08728300  | 2.10057300  |
| C | 0.74919500  | 3.99306400  | 1.89893000  |
| C | 0.89722900  | 4.56319400  | -2.97173900 |
| C | -0.18149700 | 4.63755900  | -1.86378600 |
| C | -1.15691200 | 5.81723700  | -2.12981400 |
| C | -5.69657500 | -1.17011100 | 2.47293300  |
| C | -5.04448700 | -0.08360000 | 1.58778600  |
| C | -5.66366000 | 1.30211300  | 1.93515400  |
| C | -4.22271800 | 0.11097500  | -0.85312800 |
| C | -5.17499500 | -0.36337600 | 0.08521400  |
| C | -6.29905300 | -1.03299000 | -0.43667700 |
| C | -6.45958500 | -1.20742000 | -1.82213200 |
| C | -5.50877100 | -0.69793000 | -2.71692400 |
| C | -4.35896100 | -0.01709000 | -2.25690200 |
| C | 1.50970800  | 2.74060700  | 4.01105500  |
| C | 0.33602800  | 3.10684600  | 3.07510600  |
| C | -0.80784100 | 3.79839800  | 3.86962100  |
| C | -2.90011300 | -0.41886200 | -4.33043200 |
| C | -3.38200700 | 0.59750000  | -3.26750100 |
| C | -4.03717700 | 1.83131600  | -3.94978500 |
| H | 0.88691600  | -3.65075700 | 2.00575700  |
| H | 3.17178600  | -3.18711700 | 1.57963100  |
| H | -2.23343800 | 4.05692200  | 0.08989800  |
| H | -3.90145500 | 2.60070800  | -0.72045600 |
| H | -3.26852300 | -3.67297800 | 3.74831000  |
| H | -4.48355900 | -4.86558100 | 1.94143400  |
| H | -3.65686100 | -4.75255000 | -0.39424900 |
| H | -0.16807900 | -1.61373800 | 3.24798400  |

|   |             |             |             |
|---|-------------|-------------|-------------|
| H | 3.77399200  | -0.45523600 | 1.93375700  |
| H | -2.88133200 | -1.54844000 | 4.65981100  |
| H | -2.22873600 | -0.35253700 | 3.50512600  |
| H | -1.44379800 | -0.58756200 | 5.07573500  |
| H | -1.38134500 | -3.71076200 | 5.17326400  |
| H | -0.00795700 | -2.63853600 | 5.50776500  |
| H | 0.13947800  | -3.92688000 | 4.29271300  |
| H | 6.59417700  | 0.72969300  | 2.23443600  |
| H | 5.09170100  | 1.27582400  | 2.99869200  |
| H | 5.29844200  | 1.43893800  | 1.24455800  |
| H | 4.75222600  | -2.49616700 | 3.08067300  |
| H | 4.90350700  | -1.03406400 | 4.07364700  |
| H | 6.31398800  | -1.66683800 | 3.19582100  |
| H | 7.38074700  | -0.86873000 | 0.89895100  |
| H | 8.10381600  | -1.90823400 | -1.23076500 |
| H | 6.43760800  | -2.91114400 | -2.77088300 |
| H | -0.87245100 | -2.59959800 | -1.54942200 |
| H | 2.75858000  | -3.20642700 | -1.96348500 |
| H | -2.91164200 | -4.73019100 | -2.42080400 |
| H | -2.00612200 | -3.60370400 | -3.43970600 |
| H | -3.25962600 | -2.98627600 | -2.34482800 |
| H | -0.78883200 | -5.67169900 | -1.32566000 |
| H | 0.49604600  | -4.57548800 | -0.77731600 |
| H | 0.10723200  | -4.68492300 | -2.50510100 |
| H | 3.01557600  | -1.19341300 | -3.33175300 |
| H | 2.73883400  | -2.59467500 | -4.37902300 |
| H | 4.37895100  | -1.92245700 | -4.22952000 |
| H | 5.04942000  | -4.44402800 | -3.60687900 |
| H | 3.35169300  | -4.93775200 | -3.57905200 |
| H | 4.36452600  | -5.16696400 | -2.13618600 |
| H | 1.53407700  | 6.52348500  | -0.98947400 |
| H | 2.57819000  | 6.82392600  | 1.23880300  |
| H | 2.05478100  | 5.24050800  | 3.08141800  |
| H | -0.74247200 | 3.70276100  | -1.94627100 |
| H | -3.97765500 | -0.05564500 | 1.83802200  |
| H | 1.56245400  | 5.43710100  | -2.96327800 |
| H | 0.41532100  | 4.51916300  | -3.95806700 |
| H | 1.48608900  | 3.65332200  | -2.84076500 |
| H | -1.95470800 | 5.87315200  | -1.37592700 |
| H | -1.62530200 | 5.70719500  | -3.11717000 |
| H | -0.62800200 | 6.77928100  | -2.11552000 |
| H | -6.79187600 | -1.15862500 | 2.39118800  |
| H | -5.44623800 | -0.98297900 | 3.52477600  |
| H | -5.33372200 | -2.16810600 | 2.21062900  |
| H | -5.18683800 | 2.12073300  | 1.38319700  |
| H | -5.54611000 | 1.50819000  | 3.00684500  |
| H | -6.73646000 | 1.31533000  | 1.70058800  |
| H | -7.05200800 | -1.42088200 | 0.24146900  |
| H | -7.33297400 | -1.73238700 | -2.20192900 |
| H | -5.65389600 | -0.82664800 | -3.78558000 |
| H | -0.04539300 | 2.16061000  | 2.68000200  |
| H | -2.47849900 | 0.93335700  | -2.75167400 |

|   |             |             |             |
|---|-------------|-------------|-------------|
| H | 1.93738600  | 3.61638100  | 4.51959800  |
| H | 2.29700500  | 2.22930300  | 3.44676500  |
| H | 1.15493600  | 2.04771200  | 4.78510700  |
| H | -1.14865200 | 3.14724800  | 4.68595600  |
| H | -1.67228900 | 4.01421200  | 3.22607100  |
| H | -0.47079600 | 4.74855700  | 4.30791100  |
| H | -2.32690100 | -1.21878100 | -3.85624500 |
| H | -2.23058400 | 0.08699300  | -5.03708300 |
| H | -3.73055400 | -0.85474700 | -4.90273900 |
| H | -4.36154700 | 2.58363000  | -3.21726200 |
| H | -4.91753300 | 1.54134200  | -4.53902000 |
| H | -3.31687600 | 2.30694500  | -4.62728000 |
| O | 1.57093600  | 0.35405800  | 1.54826300  |
| O | 0.12862600  | 0.18258700  | 2.00563800  |
| O | -0.35596700 | 1.03164200  | -1.98702600 |
| O | -0.29813600 | -0.46542100 | -2.07233800 |
| C | 3.11343600  | 2.38883300  | -0.41664100 |
| H | 2.93947600  | 1.94997100  | 0.56016500  |
| H | 2.98004200  | 3.46253700  | -0.50899500 |
| C | 3.51914300  | 1.63135600  | -1.49034400 |
| H | 3.64945300  | 0.56348400  | -1.35576900 |
| C | 3.85848400  | 2.17219400  | -2.85282300 |
| H | 3.78617400  | 3.26415500  | -2.89324600 |
| H | 4.87863800  | 1.87766900  | -3.14072300 |
| H | 3.17072800  | 1.74792400  | -3.59645100 |

Peroxo  $\eta^3$ -Ozone Complex to Planar Bisperoxo Complex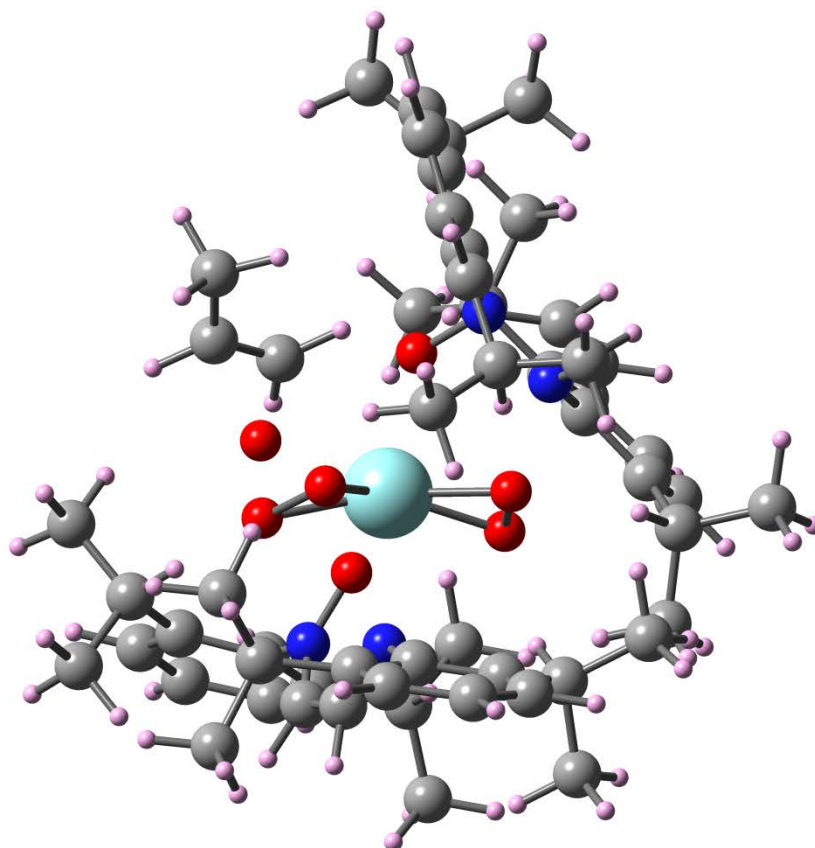Fig. S98: NCCNO Peroxo  $\eta^3$ -Ozone Complex to Planar Bisperoxo Complex

| SCF            | E <sub>ZP</sub> | H            | G           | imag freq<br>(cm <sup>-1</sup> ) |
|----------------|-----------------|--------------|-------------|----------------------------------|
| -2934.41547840 | -2933.176962    | -2933.099532 | 2933.293042 | -368                             |

|    |             |             |             |
|----|-------------|-------------|-------------|
| Zr | 0.09307800  | 0.69870700  | -0.34570900 |
| O  | -1.99277100 | -0.23044700 | -0.48817000 |
| O  | 2.00676600  | -0.42241600 | -0.85743500 |
| O  | 0.74207500  | 2.52981100  | -1.13228600 |
| N  | 1.33997600  | -2.64631700 | 1.07517200  |
| N  | 3.14264800  | -0.49954200 | -0.10667600 |
| N  | -1.47189400 | 2.44753000  | 0.68945600  |
| N  | -3.20216200 | 0.30248200  | -0.65291900 |
| C  | 2.28973700  | -2.01834400 | 1.70233200  |
| C  | 3.22029100  | -1.10442000 | 1.06331200  |
| C  | -2.75092400 | 2.49854000  | 0.44193100  |
| C  | -3.56136200 | 1.50778600  | -0.23973300 |
| C  | 0.53866400  | -3.65186900 | 1.68125200  |
| C  | -0.01360000 | -3.56689100 | 3.00207400  |
| C  | -0.73942600 | -4.67749400 | 3.48258700  |
| C  | -0.94233400 | -5.82568500 | 2.70339900  |

|   |             |             |             |
|---|-------------|-------------|-------------|
| C | -0.45020100 | -5.87050200 | 1.38852900  |
| C | 0.27571000  | -4.79252100 | 0.85175200  |
| C | -1.33172500 | -1.84774000 | 4.33930200  |
| C | 0.07620400  | -2.31828500 | 3.89079000  |
| C | 0.98332600  | -2.56316500 | 5.12616400  |
| C | 3.47378100  | 3.65558700  | 0.09444900  |
| C | 3.89995900  | 2.28136300  | 0.66862700  |
| C | 4.73557400  | 2.46012700  | 1.96589700  |
| C | 4.33803300  | 0.12284400  | -0.70374000 |
| C | 4.67864500  | 1.45081100  | -0.35534400 |
| C | 5.83232800  | 1.99287500  | -0.96557900 |
| C | 6.59400200  | 1.24640800  | -1.87472000 |
| C | 6.22934400  | -0.07345700 | -2.19070400 |
| C | 5.09116400  | -0.66776600 | -1.61142400 |
| C | -0.10898700 | -5.55102600 | -1.57497500 |
| C | 0.84334200  | -4.86587700 | -0.56724600 |
| C | 2.22969300  | -5.56773000 | -0.56397500 |
| C | 4.95215800  | -2.52832100 | -3.38249400 |
| C | 4.73924600  | -2.13266800 | -1.90131100 |
| C | 5.56337900  | -3.07389600 | -0.97766800 |
| C | -0.90538800 | 3.62688500  | 1.35037600  |
| C | -0.78232700 | 4.84855000  | 0.62625500  |
| C | -0.21456500 | 5.95053600  | 1.30227800  |
| C | 0.19997000  | 5.85970900  | 2.63736500  |
| C | 0.03650500  | 4.65355400  | 3.33543300  |
| C | -0.51747300 | 3.51608700  | 2.71457800  |
| C | -0.11349700 | 5.61271800  | -1.72293500 |
| C | -1.24118400 | 5.04363900  | -0.82590300 |
| C | -2.49670700 | 5.95778100  | -0.88558000 |
| C | -3.95653300 | -3.11246300 | 1.26256200  |
| C | -4.55868800 | -1.70598400 | 1.00388000  |
| C | -5.81603800 | -1.46626300 | 1.87933500  |
| C | -4.19538100 | -0.57719100 | -1.29876700 |
| C | -4.86451800 | -1.52009000 | -0.48535300 |
| C | -5.83495600 | -2.32622300 | -1.11784700 |
| C | -6.10093400 | -2.19274200 | -2.48933500 |
| C | -5.38942200 | -1.26374800 | -3.26679400 |
| C | -4.40317600 | -0.43454200 | -2.69226200 |
| C | 0.34470200  | 1.89495300  | 4.50477600  |
| C | -0.80479500 | 2.25813200  | 3.53764100  |
| C | -2.14283700 | 2.43437300  | 4.31016600  |
| C | -3.19942800 | -0.03048800 | -4.91168200 |
| C | -3.61827900 | 0.56870800  | -3.54642000 |
| C | -4.43875900 | 1.86910800  | -3.77007600 |
| H | 2.54196400  | -2.21817700 | 2.74910900  |
| H | 4.16789400  | -0.95605900 | 1.57370700  |
| H | -3.32636600 | 3.37442500  | 0.75324800  |
| H | -4.59851000 | 1.75922300  | -0.42268800 |
| H | -1.15935100 | -4.63807100 | 4.48461500  |
| H | -1.49302900 | -6.67070300 | 3.11052400  |
| H | -0.63466500 | -6.74961100 | 0.77761000  |
| H | 0.47990800  | -1.49067500 | 3.30304100  |

|   |             |             |             |
|---|-------------|-------------|-------------|
| H | 2.98497800  | 1.75025200  | 0.94528900  |
| H | -1.84817500 | -2.59721400 | 4.95390500  |
| H | -1.95102000 | -1.62077300 | 3.46397500  |
| H | -1.24299600 | -0.93025900 | 4.93490700  |
| H | 0.57145500  | -3.34970700 | 5.77337000  |
| H | 1.07001200  | -1.64535400 | 5.72316900  |
| H | 1.99574200  | -2.87677100 | 4.83660700  |
| H | 4.34191900  | 4.27781400  | -0.16397700 |
| H | 2.88019900  | 4.19773800  | 0.84120500  |
| H | 2.84803100  | 3.52672300  | -0.79470200 |
| H | 5.01403600  | 1.49350400  | 2.40820200  |
| H | 4.15026900  | 3.01585700  | 2.70919600  |
| H | 5.66084200  | 3.01988800  | 1.77263000  |
| H | 6.12810200  | 3.01037900  | -0.72643800 |
| H | 7.47403300  | 1.68885900  | -2.33573000 |
| H | 6.83371300  | -0.64124200 | -2.89193900 |
| H | 1.00304300  | -3.83381300 | -0.89457200 |
| H | 3.67757200  | -2.28397800 | -1.67418900 |
| H | -0.21998400 | -6.62562600 | -1.37640100 |
| H | 0.28949100  | -5.44627500 | -2.59277900 |
| H | -1.10732700 | -5.09578000 | -1.55325100 |
| H | 2.14273200  | -6.60538300 | -0.21360000 |
| H | 2.93534400  | -5.04601100 | 0.09462100  |
| H | 2.65411800  | -5.58515200 | -1.57754400 |
| H | 4.41986300  | -1.85108100 | -4.05893400 |
| H | 4.57632300  | -3.54579000 | -3.55192100 |
| H | 6.01478100  | -2.52330500 | -3.65741300 |
| H | 6.63874000  | -2.96042900 | -1.16884800 |
| H | 5.29131800  | -4.12157500 | -1.16028200 |
| H | 5.38609600  | -2.85813400 | 0.08339800  |
| H | -0.09510000 | 6.88959600  | 0.76845700  |
| H | 0.63531400  | 6.72413600  | 3.13368200  |
| H | 0.33474000  | 4.59507600  | 4.37813900  |
| H | -1.49720200 | 4.07206200  | -1.25655100 |
| H | -3.79751000 | -0.97840900 | 1.30790200  |
| H | 0.20713700  | 6.61301000  | -1.40144500 |
| H | -0.46915000 | 5.69299100  | -2.75919300 |
| H | 0.74433700  | 4.93472200  | -1.70901500 |
| H | -3.32933500 | 5.55534300  | -0.29093700 |
| H | -2.83887400 | 6.06497100  | -1.92390300 |
| H | -2.27514500 | 6.96171900  | -0.49932900 |
| H | -4.66309400 | -3.90698800 | 0.98825400  |
| H | -3.71066800 | -3.22967100 | 2.32487300  |
| H | -3.03484400 | -3.25673500 | 0.68804300  |
| H | -6.23444500 | -0.46369700 | 1.71972200  |
| H | -5.55797400 | -1.56263300 | 2.94160800  |
| H | -6.60451000 | -2.19767800 | 1.65978700  |
| H | -6.37846800 | -3.06300300 | -0.53292200 |
| H | -6.85531100 | -2.82090800 | -2.95689400 |
| H | -5.59200100 | -1.19047700 | -4.33091300 |
| H | -0.90888600 | 1.41101000  | 2.85400400  |
| H | -2.68907500 | 0.83021500  | -3.02734700 |



|   |             |             |             |
|---|-------------|-------------|-------------|
| H | 0.51075800  | 2.66172300  | 5.27439900  |
| H | 1.26856400  | 1.74215300  | 3.93778500  |
| H | 0.10758200  | 0.95738500  | 5.02508300  |
| H | -2.38616300 | 1.51800700  | 4.86521800  |
| H | -2.97784500 | 2.64857600  | 3.62794000  |
| H | -2.08069900 | 3.26296100  | 5.02950100  |
| H | -2.67535300 | -0.98480800 | -4.78312000 |
| H | -2.52202300 | 0.66607300  | -5.42025500 |
| H | -4.06117500 | -0.19724500 | -5.57160500 |
| H | -4.70156400 | 2.35827000  | -2.82353500 |
| H | -5.37170200 | 1.65759000  | -4.31015700 |
| H | -3.85266800 | 2.58292000  | -4.36215700 |
| O | 1.11546700  | 0.80746200  | 1.48675100  |
| O | -0.10088100 | -0.13627500 | 1.53967000  |
| O | -0.49305700 | 2.10476900  | -1.91513900 |
| O | -0.13848100 | 0.44432700  | -2.55819000 |
| C | 0.17013900  | -1.73520100 | -2.96977900 |
| H | 0.92929900  | -2.04422600 | -2.25910500 |
| H | -0.83319700 | -2.13269100 | -2.84529800 |
| C | 0.46481100  | -0.83353200 | -3.97227400 |
| H | -0.31840700 | -0.58592200 | -4.68643800 |
| C | 1.84536300  | -0.33166700 | -4.31202200 |
| H | 2.24752600  | -0.86619000 | -5.18736500 |
| H | 1.80229600  | 0.73587600  | -4.55529100 |
| H | 2.52191400  | -0.45773600 | -3.46382400 |

## Oxo Peroxo Complex to Dioxo Complex

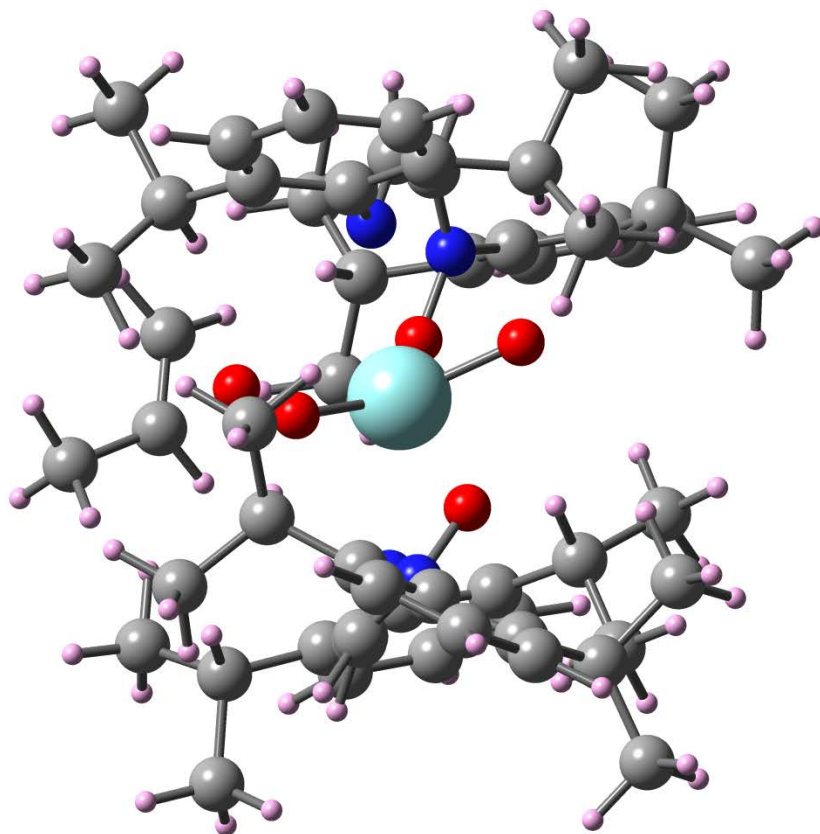

Fig. S99: NCCNO Oxo Peroxo Complex to Dioxo Complex

| SCF          | E <sub>ZP</sub> | H            | G            | imag freq (cm <sup>-1</sup> ) |
|--------------|-----------------|--------------|--------------|-------------------------------|
| -2784.071283 | -2782.838443    | -2782.763423 | -2782.952859 | -480                          |

|    |             |             |             |
|----|-------------|-------------|-------------|
| Zr | 0.12985800  | 0.16853300  | 0.13111800  |
| O  | -2.16541300 | 0.37800600  | 0.17670700  |
| O  | 1.96513700  | -0.84710100 | -1.08796800 |
| O  | 0.01352600  | 1.02544500  | -1.54543300 |
| N  | 0.00441400  | -2.41948300 | 0.24813500  |
| N  | 2.84539700  | -1.66593100 | -0.52027400 |
| N  | -0.08593100 | 2.59739100  | 0.59062400  |
| N  | -2.87426500 | 1.47183800  | -0.15737900 |
| C  | 1.11597700  | -3.06965400 | 0.50969500  |
| C  | 2.47740800  | -2.63271800 | 0.31389000  |
| C  | -1.20011500 | 3.25875800  | 0.42268800  |
| C  | -2.49470900 | 2.72463700  | 0.06140400  |
| C  | -1.23563300 | -3.18969800 | 0.24999500  |
| C  | -1.66792000 | -3.98707500 | 1.35769000  |
| C  | -2.90489400 | -4.65990000 | 1.23812200  |
| C  | -3.68456600 | -4.57582400 | 0.07969300  |

|   |             |             |             |
|---|-------------|-------------|-------------|
| C | -3.22308400 | -3.82647100 | -1.01265300 |
| C | -1.99870100 | -3.13481900 | -0.95926800 |
| C | -1.75863600 | -4.11175300 | 3.93144100  |
| C | -0.87436600 | -4.21073700 | 2.65835300  |
| C | -0.18911700 | -5.60882500 | 2.65305600  |
| C | 5.21558700  | 1.10937600  | 1.54692100  |
| C | 4.74454200  | -0.35368600 | 1.35028400  |
| C | 5.29073300  | -1.25953900 | 2.48640400  |
| C | 4.25319900  | -1.50332700 | -0.92374200 |
| C | 5.15773200  | -0.89325900 | -0.02274900 |
| C | 6.49906000  | -0.78664100 | -0.45480300 |
| C | 6.89495500  | -1.23608500 | -1.72255800 |
| C | 5.95620300  | -1.80302700 | -2.60073700 |
| C | 4.60698100  | -1.95135900 | -2.22216000 |
| C | -2.51822700 | -2.05395100 | -3.24119100 |
| C | -1.43919500 | -2.46879600 | -2.22050300 |
| C | -0.42310800 | -3.42487400 | -2.90942100 |
| C | 3.14494100  | -1.42474900 | -4.21467500 |
| C | 3.58153900  | -2.52328600 | -3.20591000 |
| C | 4.09571600  | -3.78482700 | -3.94199800 |
| C | 1.11712800  | 3.42880000  | 0.73016200  |
| C | 1.68135700  | 4.03425200  | -0.43065700 |
| C | 2.82376800  | 4.84636500  | -0.25363700 |
| C | 3.38284200  | 5.06463600  | 1.01209000  |
| C | 2.80038000  | 4.46426200  | 2.13781500  |
| C | 1.66710000  | 3.63407100  | 2.02377800  |
| C | 2.19907500  | 3.26226900  | -2.80050800 |
| C | 1.12791700  | 3.85489000  | -1.84983700 |
| C | 0.57682300  | 5.19549600  | -2.40441400 |
| C | -5.23950900 | -1.11421200 | 1.67960900  |
| C | -5.14121800 | 0.40711500  | 1.39742500  |
| C | -6.21265400 | 1.19325400  | 2.19685800  |
| C | -4.15242900 | 1.22354500  | -0.84879000 |
| C | -5.23257500 | 0.69588300  | -0.10190200 |
| C | -6.43798800 | 0.45612900  | -0.79402300 |
| C | -6.55114400 | 0.74041200  | -2.16334600 |
| C | -5.46039300 | 1.27055500  | -2.87070700 |
| C | -4.22410000 | 1.52309300  | -2.23759900 |
| C | 2.05804400  | 2.32607700  | 4.17544400  |
| C | 1.02512500  | 3.05599200  | 3.28451900  |
| C | 0.28409700  | 4.16885100  | 4.07454900  |
| C | -2.93658100 | 1.50867500  | -4.46345500 |
| C | -3.05380300 | 2.11397500  | -3.04189700 |
| C | -3.20367000 | 3.65691500  | -3.17930800 |
| H | 1.06283800  | -4.11548200 | 0.81743700  |
| H | 3.27452400  | -3.24251200 | 0.71913400  |
| H | -1.19035000 | 4.35128300  | 0.46147700  |
| H | -3.26094100 | 3.45707500  | -0.16008300 |
| H | -3.26043300 | -5.25906000 | 2.07114600  |
| H | -4.63515800 | -5.10040000 | 0.02171900  |
| H | -3.81752700 | -3.78696900 | -1.91866900 |
| H | -0.09305300 | -3.44702900 | 2.74377200  |

|   |             |             |             |
|---|-------------|-------------|-------------|
| H | 3.64952200  | -0.32246400 | 1.42391100  |
| H | -2.43276600 | -4.97261900 | 4.01969300  |
| H | -2.36921400 | -3.20323400 | 3.94058000  |
| H | -1.12116800 | -4.10407300 | 4.82448600  |
| H | -0.94534500 | -6.40358100 | 2.61676900  |
| H | 0.40345400  | -5.74613200 | 3.56732300  |
| H | 0.47397200  | -5.75772200 | 1.79139800  |
| H | 6.31103400  | 1.19953800  | 1.56429200  |
| H | 4.82939500  | 1.48961700  | 2.50006500  |
| H | 4.82319600  | 1.75654900  | 0.75442000  |
| H | 4.93090900  | -2.29406400 | 2.39448800  |
| H | 4.95992600  | -0.87476500 | 3.45950700  |
| H | 6.38957800  | -1.28805300 | 2.48684100  |
| H | 7.23089800  | -0.33006800 | 0.20519600  |
| H | 7.93254500  | -1.13584500 | -2.03258100 |
| H | 6.27438500  | -2.13291100 | -3.58536500 |
| H | -0.89585800 | -1.55814800 | -1.94493000 |
| H | 2.68300200  | -2.81441700 | -2.64937600 |
| H | -3.01898500 | -2.92209400 | -3.69112500 |
| H | -2.04001600 | -1.49728500 | -4.05493100 |
| H | -3.27928400 | -1.41007600 | -2.78521500 |
| H | -0.92854500 | -4.33567600 | -3.25924400 |
| H | 0.38358700  | -3.72447000 | -2.23041000 |
| H | 0.03257900  | -2.92697100 | -3.77477200 |
| H | 2.69216600  | -0.57809100 | -3.68855500 |
| H | 2.40595800  | -1.82967100 | -4.91947700 |
| H | 4.00501500  | -1.06257900 | -4.79405100 |
| H | 4.92982500  | -3.55285700 | -4.61637400 |
| H | 3.29048400  | -4.21047200 | -4.55496500 |
| H | 4.43439800  | -4.55575700 | -3.23748300 |
| H | 3.27500500  | 5.31288400  | -1.12591300 |
| H | 4.25984100  | 5.69900000  | 1.12109800  |
| H | 3.22713100  | 4.64242200  | 3.12149000  |
| H | 0.33097800  | 3.10527600  | -1.83076600 |
| H | -4.16100800 | 0.73680600  | 1.75312800  |
| H | 3.08371800  | 3.90842300  | -2.89063900 |
| H | 1.77171700  | 3.12909900  | -3.80377700 |
| H | 2.50958300  | 2.27649100  | -2.43920900 |
| H | -0.21822300 | 5.60392600  | -1.76425700 |
| H | 0.16126700  | 5.04701100  | -3.41097600 |
| H | 1.36478100  | 5.95800000  | -2.47758800 |
| H | -6.21505400 | -1.51328300 | 1.37028700  |
| H | -5.12158300 | -1.30609800 | 2.75410400  |
| H | -4.45905100 | -1.66451800 | 1.14341200  |
| H | -6.13754000 | 2.27331300  | 2.01554700  |
| H | -6.08063200 | 1.01757300  | 3.27226700  |
| H | -7.22935700 | 0.87725800  | 1.93002800  |
| H | -7.29131200 | 0.05305700  | -0.25519000 |
| H | -7.48900200 | 0.55125400  | -2.68029100 |
| H | -5.56407500 | 1.48041800  | -3.93085700 |
| H | 0.30594900  | 2.29149100  | 2.98176500  |
| H | -2.10936100 | 1.89068300  | -2.52747400 |

|   |             |             |             |
|---|-------------|-------------|-------------|
| H | 2.87358200  | 2.98564700  | 4.50446500  |
| H | 2.47045900  | 1.47999100  | 3.61664700  |
| H | 1.56626600  | 1.93686700  | 5.07787000  |
| H | -0.21649300 | 3.74433000  | 4.95629500  |
| H | -0.47858800 | 4.66346200  | 3.45635900  |
| H | 0.98124500  | 4.94343900  | 4.42393400  |
| H | -2.93443500 | 0.41622100  | -4.43787000 |
| H | -1.99297300 | 1.83769900  | -4.91531300 |
| H | -3.75231100 | 1.83836200  | -5.12151200 |
| H | -3.22705400 | 4.17093100  | -2.21132300 |
| H | -4.12916700 | 3.91132400  | -3.71396300 |
| H | -2.35732300 | 4.06222800  | -3.74777600 |
| O | 1.65611300  | 0.27020200  | 1.37373900  |
| O | 0.06789900  | 0.17620800  | 2.42325100  |
| C | -0.90355600 | -0.73117700 | 3.62394600  |
| H | -1.24382300 | -1.58196100 | 3.04101300  |
| C | -1.73927300 | 0.38962000  | 3.63873100  |
| H | -2.56156800 | 0.48012600  | 2.93971000  |
| H | -1.54153800 | 1.22542000  | 4.30372500  |
| C | 0.07451000  | -1.04340500 | 4.73634000  |
| H | 0.40789700  | -0.12040600 | 5.22136600  |
| H | -0.38276100 | -1.69296200 | 5.49734800  |
| H | 0.96107000  | -1.54519000 | 4.33124000  |

Dioxo Complex to Oxo  $\eta^2$ -Ozone Complex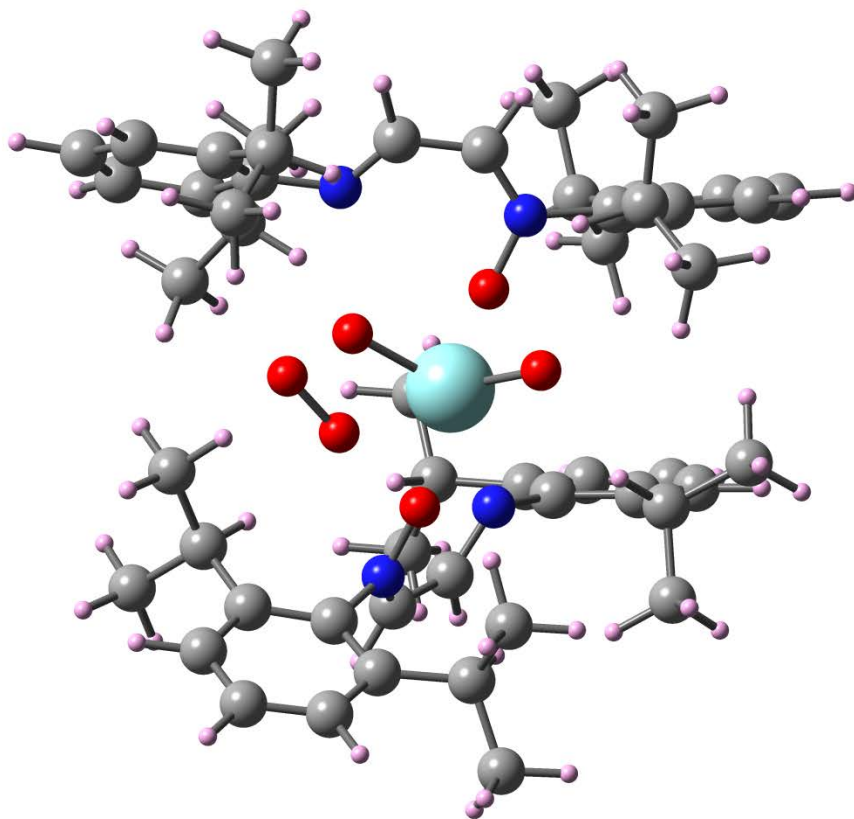Fig. S100: NCCNO Dioxo Complex to Oxo  $\eta^2$ -Ozone Complex

| SCF          | $E_{ZP}$     | H            | G            | imag freq<br>( $\text{cm}^{-1}$ ) |
|--------------|--------------|--------------|--------------|-----------------------------------|
| -2741.368026 | -2740.215586 | -2740.143736 | -2740.326814 | -153                              |

|    |             |             |             |
|----|-------------|-------------|-------------|
| Zr | 0.35365303  | -0.23514602 | -0.55306804 |
| O  | -1.82963714 | 0.03157100  | -0.06619401 |
| O  | 2.55909220  | -0.82247806 | -0.66580405 |
| O  | 0.84990207  | 1.62943412  | -1.09614308 |
| N  | 0.74361006  | -2.00990415 | 1.19223609  |
| N  | 3.45685126  | -0.99697308 | 0.30688402  |
| N  | -1.71488713 | 2.97331423  | -0.27505302 |
| N  | -2.83973022 | 0.23680602  | -0.96193507 |
| C  | 1.86408014  | -2.05060616 | 1.87061614  |
| C  | 3.14263224  | -1.48903311 | 1.49583011  |
| C  | -2.46831019 | 2.69366320  | -1.29824110 |
| C  | -3.11915124 | 1.41278611  | -1.49587211 |
| C  | -0.36267603 | -2.78123621 | 1.74158613  |
| C  | -0.91434207 | -2.44339219 | 3.01052623  |
| C  | -1.93144515 | -3.27960525 | 3.52018327  |
| C  | -2.39118718 | -4.39205634 | 2.80186421  |

|   |             |             |             |
|---|-------------|-------------|-------------|
| C | -1.85441814 | -4.68103636 | 1.53612812  |
| C | -0.83574607 | -3.88571430 | 0.97599408  |
| C | -1.70726213 | -0.23110102 | 3.97766931  |
| C | -0.50555304 | -1.19742709 | 3.80970229  |
| C | 0.09459001  | -1.57039312 | 5.19079340  |
| C | 4.22200132  | 2.85457422  | 0.00699000  |
| C | 4.49304534  | 1.68318013  | 0.98857407  |
| C | 5.15024339  | 2.18974417  | 2.29784018  |
| C | 4.84585437  | -0.66601205 | -0.04681100 |
| C | 5.34336240  | 0.60990805  | 0.30369402  |
| C | 6.68037450  | 0.88567707  | -0.05894100 |
| C | 7.45468856  | -0.05851400 | -0.74904506 |
| C | 6.90986851  | -1.30348310 | -1.10627609 |
| C | 5.58383743  | -1.63863812 | -0.76579106 |
| C | -1.18119409 | -4.92951238 | -1.34925810 |
| C | -0.19826601 | -4.24917532 | -0.36947903 |
| C | 1.04694408  | -5.15416040 | -0.15098001 |
| C | 4.59557935  | -2.88181322 | -2.72990221 |
| C | 4.97181238  | -2.96596023 | -1.22461910 |
| C | 5.89476647  | -4.17708432 | -0.94340707 |
| C | -1.09290708 | 4.22167932  | -0.07761701 |
| C | -0.47451204 | 4.98682938  | -1.12266909 |
| C | 0.05109900  | 6.24901148  | -0.78198906 |
| C | -0.00390400 | 6.74164052  | 0.53093804  |
| C | -0.53632404 | 5.94437546  | 1.55927412  |
| C | -1.05980908 | 4.67002635  | 1.28478610  |
| C | 1.25736210  | 4.47150634  | -2.91299922 |
| C | -0.24986402 | 4.46338334  | -2.54802019 |
| C | -1.07859408 | 5.25976340  | -3.59086727 |
| C | -5.08990739 | -1.38370911 | 2.29411518  |
| C | -4.76976336 | -0.50536404 | 1.06269508  |
| C | -5.87246747 | 0.57690205  | 0.87866207  |
| C | -3.70738828 | -0.92141107 | -1.25473110 |
| C | -4.61273435 | -1.31232610 | -0.23249702 |
| C | -5.44591140 | -2.41550418 | -0.49937404 |
| C | -5.38371640 | -3.08495723 | -1.73305313 |
| C | -4.49873634 | -2.65117720 | -2.72899821 |
| C | -3.63275528 | -1.55297512 | -2.52164819 |
| C | -0.90346207 | 3.94873930  | 3.74249128  |
| C | -1.63680512 | 3.78716629  | 2.39182118  |
| C | -3.15947024 | 4.04418131  | 2.56563420  |
| C | -1.94066815 | -2.22402917 | -4.32789633 |
| C | -2.74233721 | -1.07235308 | -3.67489928 |
| C | -3.60376728 | -0.33508403 | -4.73891736 |
| H | 1.90009615  | -2.61145620 | 2.80925722  |
| H | 3.96049830  | -1.57092412 | 2.20076017  |
| H | -2.74096721 | 3.43462826  | -2.05876316 |
| H | -3.94566130 | 1.39201811  | -2.19843817 |
| H | -2.37121318 | -3.04807723 | 4.48729734  |
| H | -3.17029324 | -5.02555838 | 3.21969925  |
| H | -2.22884717 | -5.53430644 | 0.97944407  |
| H | 0.24859202  | -0.63566805 | 3.25119425  |

|   |             |             |             |
|---|-------------|-------------|-------------|
| H | 3.51426027  | 1.26958310  | 1.24849510  |
| H | -2.52254519 | -0.69069605 | 4.55236235  |
| H | -2.09643616 | 0.06995401  | 2.99852623  |
| H | -1.38525510 | 0.67437105  | 4.50835234  |
| H | -0.63963205 | -2.08834716 | 5.82200042  |
| H | 0.41265103  | -0.66381905 | 5.72202646  |
| H | 0.96703007  | -2.23103117 | 5.09160839  |
| H | 5.15796939  | 3.32905925  | -0.32006002 |
| H | 3.59799828  | 3.60969127  | 0.49842504  |
| H | 3.67162828  | 2.50080719  | -0.87116607 |
| H | 5.34145043  | 1.36819111  | 3.00182823  |
| H | 4.48387434  | 2.91011422  | 2.78829221  |
| H | 6.10529446  | 2.69676920  | 2.10546116  |
| H | 7.10784356  | 1.85234514  | 0.19165001  |
| H | 8.48033667  | 0.17906401  | -1.02133708 |
| H | 7.51664357  | -2.01631315 | -1.65717612 |
| H | 0.13546901  | -3.32387225 | -0.85363607 |
| H | 4.03689131  | -3.13631124 | -0.67663605 |
| H | -1.46800611 | -5.93753945 | -1.01815408 |
| H | -0.70375605 | -5.02969638 | -2.33208818 |
| H | -2.09128516 | -4.33221133 | -1.47772111 |
| H | 0.75998706  | -6.10979447 | 0.30955702  |
| H | 1.79037014  | -4.67615036 | 0.50023604  |
| H | 1.52992511  | -5.36923039 | -1.11344109 |
| H | 3.88052730  | -2.07093416 | -2.90506322 |
| H | 4.13424432  | -3.82244529 | -3.05814224 |
| H | 5.48621841  | -2.70368221 | -3.34739126 |
| H | 6.81791052  | -4.13294431 | -1.53511112 |
| H | 5.37914839  | -5.10812339 | -1.21172609 |
| H | 6.17558047  | -4.23409132 | 0.11643201  |
| H | 0.52740204  | 6.84846453  | -1.55367412 |
| H | 0.39346003  | 7.72866759  | 0.75727506  |
| H | -0.52650104 | 6.31425046  | 2.58012420  |
| H | -0.54602604 | 3.41174926  | -2.58975020 |
| H | -3.82369729 | 0.00708200  | 1.26567009  |
| H | 1.68129713  | 5.48456044  | -2.91024522 |
| H | 1.39780411  | 4.05132031  | -3.91849530 |
| H | 1.80786514  | 3.84516730  | -2.20433217 |
| H | -2.15468716 | 5.23816740  | -3.36742025 |
| H | -0.92847207 | 4.84264637  | -4.59571535 |
| H | -0.77228406 | 6.31415246  | -3.61595628 |
| H | -6.08676748 | -1.83934714 | 2.22429117  |
| H | -5.07799439 | -0.76503706 | 3.20077224  |
| H | -4.35037833 | -2.18200417 | 2.41553019  |
| H | -5.64895142 | 1.24814309  | 0.03997900  |
| H | -5.95758648 | 1.18918509  | 1.78587214  |
| H | -6.84799954 | 0.11020101  | 0.68705905  |
| H | -6.15032246 | -2.74827721 | 0.25644602  |
| H | -6.03351548 | -3.93672830 | -1.92018414 |
| H | -4.47157434 | -3.16917024 | -3.68284528 |
| H | -1.50972612 | 2.75221221  | 2.05610216  |
| H | -1.98688215 | -0.38568103 | -3.28239925 |



|   |             |             |             |
|---|-------------|-------------|-------------|
| H | -1.06835008 | 4.93795138  | 4.19163832  |
| H | 0.17620701  | 3.79631329  | 3.62504128  |
| H | -1.27661110 | 3.20197125  | 4.45624634  |
| H | -3.57597827 | 3.37551226  | 3.33189425  |
| H | -3.70075728 | 3.86674330  | 1.62793412  |
| H | -3.35019325 | 5.08048439  | 2.87809722  |
| H | -1.24848109 | -2.64664720 | -3.59550628 |
| H | -1.33771510 | -1.82270414 | -5.15277639 |
| H | -2.58954320 | -3.01023723 | -4.73838336 |
| H | -4.16696232 | 0.50745604  | -4.31306333 |
| H | -4.33154033 | -1.01662008 | -5.19968040 |
| H | -2.95839422 | 0.05843400  | -5.53479344 |
| O | 1.09172808  | 1.98599915  | 0.85690106  |
| O | 1.06816208  | 0.73214006  | 1.47386311  |
| O | -0.01705000 | -1.20016209 | -2.06330916 |

Oxo  $\eta^2$ -Ozone Complex to Oxo  $\eta^3$ -Ozone Complex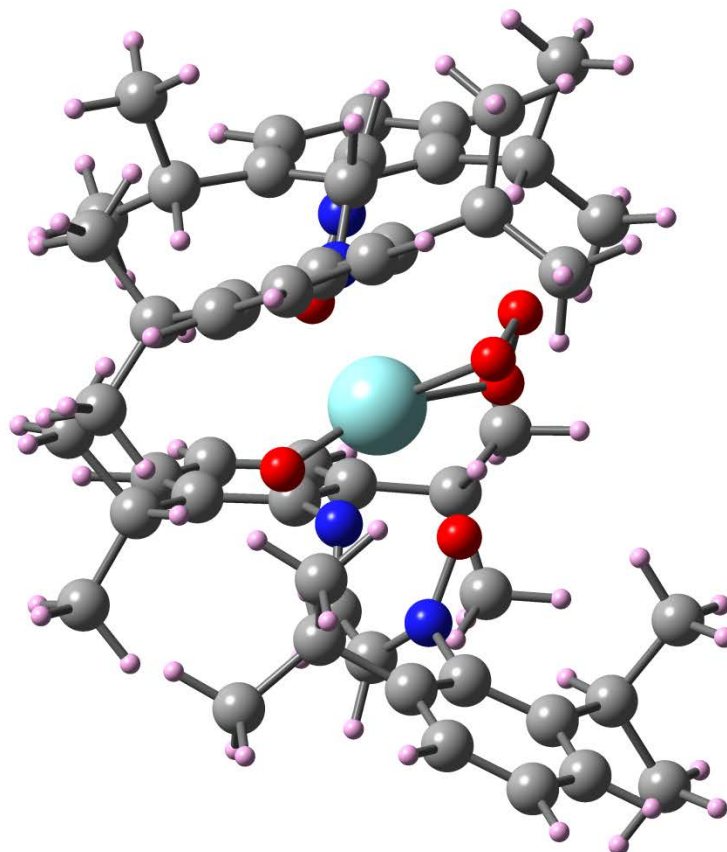Fig. S101: NCCNO Oxo  $\eta^2$ -Ozone Complex to Oxo  $\eta^3$ -Ozone Complex

| SCF          | $E_{ZP}$     | H            | G            | imag freq<br>( $\text{cm}^{-1}$ ) |
|--------------|--------------|--------------|--------------|-----------------------------------|
| -2741.392519 | -2740.237910 | -2740.167190 | -2740.345135 | -58                               |

|    |             |             |             |
|----|-------------|-------------|-------------|
| Zr | 0.26806502  | 0.14673701  | -0.16554701 |
| O  | -1.94770915 | 0.43859803  | 0.26332402  |
| O  | 2.21516617  | -1.01680508 | -0.73057406 |
| O  | 1.01183908  | 1.04431808  | -1.95847915 |
| N  | 0.00819300  | -2.12850016 | 0.84435607  |
| N  | 2.94555723  | -1.78601214 | 0.06960701  |
| N  | -0.21651202 | 2.60989620  | -0.17847601 |
| N  | -2.80364421 | 1.13206009  | -0.52942104 |
| C  | 1.03964308  | -2.80607822 | 1.27693410  |
| C  | 2.43976619  | -2.58172320 | 0.99905207  |
| C  | -1.30235410 | 3.08309323  | -0.73533905 |
| C  | -2.51187619 | 2.33475118  | -0.99307708 |
| C  | -1.28143910 | -2.62186420 | 1.33118610  |
| C  | -1.65875513 | -2.33853618 | 2.67179320  |
| C  | -2.87459922 | -2.88756622 | 3.13480324  |
| C  | -3.68348728 | -3.67260828 | 2.30131917  |

|   |             |             |             |
|---|-------------|-------------|-------------|
| C | -3.29219325 | -3.92128530 | 0.97524407  |
| C | -2.08564616 | -3.40582226 | 0.46019504  |
| C | -1.62440012 | -0.31205502 | 4.22447732  |
| C | -0.80573506 | -1.47943611 | 3.61703627  |
| C | -0.18464301 | -2.34231818 | 4.74876136  |
| C | 4.91632137  | 1.52592512  | 1.45239011  |
| C | 4.54302834  | 0.04242800  | 1.70635613  |
| C | 4.97177838  | -0.39715303 | 3.13112324  |
| C | 4.39874334  | -1.73674013 | -0.16629401 |
| C | 5.16500739  | -0.86580406 | 0.63997105  |
| C | 6.55714451  | -0.85112506 | 0.40188303  |
| C | 7.12656352  | -1.64273313 | -0.60697205 |
| C | 6.31896549  | -2.46180319 | -1.41505211 |
| C | 4.92456737  | -2.52633619 | -1.21771009 |
| C | -2.79158521 | -3.95714230 | -1.94848615 |
| C | -1.62187112 | -3.74169028 | -0.96133507 |
| C | -0.71122005 | -5.00251238 | -0.95680407 |
| C | 3.68846428  | -2.51074419 | -3.41901026 |
| C | 4.02710431  | -3.34526425 | -2.15062017 |
| C | 4.63847535  | -4.71477436 | -2.53118819 |
| C | 0.85950707  | 3.55442227  | 0.09037801  |
| C | 1.52213812  | 4.23788332  | -0.97278508 |
| C | 2.56284520  | 5.12688739  | -0.62355305 |
| C | 2.92238522  | 5.35225840  | 0.71138805  |
| C | 2.23660717  | 4.68705536  | 1.73947013  |
| C | 1.19999409  | 3.77748829  | 1.45671211  |
| C | 2.42214818  | 3.59790027  | -3.27265825 |
| C | 1.18812209  | 4.06783631  | -2.46178519 |
| C | 0.60638705  | 5.38090943  | -3.05293423 |
| C | -5.38168743 | 0.03192600  | 2.78590821  |
| C | -4.71077236 | 0.84840306  | 1.65847613  |
| C | -5.15051139 | 2.33875618  | 1.74906613  |
| C | -4.09739931 | 0.49820004  | -0.82772506 |
| C | -4.99966438 | 0.30430102  | 0.25387502  |
| C | -6.22447750 | -0.32296402 | -0.04075700 |
| C | -6.53662752 | -0.72503506 | -1.35101410 |
| C | -5.63428543 | -0.49125304 | -2.39586818 |
| C | -4.38490133 | 0.13013701  | -2.16751117 |
| C | 1.26858910  | 2.65113220  | 3.76157629  |
| C | 0.38731503  | 3.16458924  | 2.60109020  |
| C | -0.66702705 | 4.18901532  | 3.10616624  |
| C | -3.15057524 | -0.87528207 | -4.17834932 |
| C | -3.46441226 | 0.40443503  | -3.36515926 |
| C | -4.09149931 | 1.49556911  | -4.27778233 |
| H | 0.87146306  | -3.65724728 | 1.94300915  |
| H | 3.16265624  | -3.16598924 | 1.55480512  |
| H | -1.36017110 | 4.13510832  | -1.02340108 |
| H | -3.29174825 | 2.81702722  | -1.56899012 |
| H | -3.18721324 | -2.69622120 | 4.15855332  |
| H | -4.61344435 | -4.09056131 | 2.68063820  |
| H | -3.92942630 | -4.52502534 | 0.33643403  |
| H | 0.00901600  | -1.01677308 | 3.04903223  |

|   |             |             |             |
|---|-------------|-------------|-------------|
| H | 3.44855027  | -0.01150100 | 1.65178913  |
| H | -2.45313519 | -0.67029605 | 4.85017437  |
| H | -2.03762515 | 0.32276402  | 3.43226626  |
| H | -0.97346807 | 0.30987602  | 4.85267737  |
| H | -0.96239707 | -2.81229821 | 5.36611740  |
| H | 0.43719203  | -1.71793913 | 5.40391340  |
| H | 0.44777803  | -3.14568124 | 4.34719733  |
| H | 5.99653345  | 1.70139613  | 1.55085312  |
| H | 4.39976034  | 2.16590116  | 2.17763317  |
| H | 4.60432735  | 1.84313614  | 0.45060003  |
| H | 4.67794635  | -1.43499711 | 3.33970226  |
| H | 4.49171734  | 0.24550702  | 3.88005730  |
| H | 6.05970546  | -0.32246702 | 3.26614325  |
| H | 7.19185257  | -0.20429002 | 1.00115508  |
| H | 8.20061564  | -1.61277412 | -0.77513806 |
| H | 6.77510850  | -3.05052923 | -2.20514317 |
| H | -1.03192808 | -2.89606922 | -1.33703310 |
| H | 3.07557223  | -3.54329927 | -1.64020212 |
| H | -3.34313426 | -4.88384438 | -1.73625713 |
| H | -2.39912718 | -4.03576631 | -2.97001023 |
| H | -3.49847127 | -3.12033924 | -1.92038915 |
| H | -1.26233110 | -5.87968243 | -0.59013104 |
| H | 0.17185201  | -4.86955137 | -0.31992802 |
| H | -0.36136803 | -5.21781140 | -1.97506115 |
| H | 3.16963924  | -1.58527112 | -3.14917624 |
| H | 3.03323223  | -3.08721923 | -4.08503931 |
| H | 4.60325935  | -2.25659017 | -3.97164530 |
| H | 5.53313140  | -4.60108735 | -3.15669824 |
| H | 3.91001430  | -5.29623642 | -3.11047624 |
| H | 4.91561737  | -5.29866942 | -1.64359312 |
| H | 3.09653124  | 5.64671046  | -1.41496511 |
| H | 3.72515128  | 6.04619647  | 0.95004507  |
| H | 2.50443219  | 4.88162937  | 2.77400221  |
| H | 0.44818103  | 3.27245425  | -2.57522120 |
| H | -3.63011828 | 0.80160506  | 1.82308014  |
| H | 3.25260225  | 4.31449333  | -3.21547725 |
| H | 2.14997316  | 3.48009927  | -4.33026133 |
| H | 2.75793521  | 2.62380520  | -2.90451822 |
| H | -0.28733202 | 5.71686645  | -2.50755119 |
| H | 0.32860103  | 5.23073940  | -4.10479231 |
| H | 1.33960910  | 6.19744946  | -3.01329423 |
| H | -6.47480348 | 0.13806501  | 2.77623821  |
| H | -5.02893538 | 0.39437103  | 3.75989329  |
| H | -5.13071939 | -1.03139108 | 2.70797021  |
| H | -4.65154036 | 2.96084422  | 0.99527708  |
| H | -4.90294937 | 2.74631621  | 2.73781421  |
| H | -6.23476148 | 2.43355219  | 1.60200712  |
| H | -6.94120554 | -0.49578004 | 0.75514406  |
| H | -7.48760058 | -1.21139909 | -1.55509812 |
| H | -5.89318847 | -0.79596906 | -3.40575726 |
| H | -0.13635601 | 2.28881918  | 2.21081517  |
| H | -2.49630119 | 0.76851506  | -3.01510023 |

|   |             |             |             |
|---|-------------|-------------|-------------|
| H | 1.86066614  | 3.44905727  | 4.23048432  |
| H | 1.93361015  | 1.86615914  | 3.38825826  |
| H | 0.63263205  | 2.21277217  | 4.54301435  |
| H | -1.29249710 | 3.73711829  | 3.88814430  |
| H | -1.32635210 | 4.52456935  | 2.29339617  |
| H | -0.18209201 | 5.07883239  | 3.53063127  |
| H | -2.56480120 | -1.56818812 | -3.56986527 |
| H | -2.53939519 | -0.60985005 | -5.05018539 |
| H | -4.05833931 | -1.37693010 | -4.54028934 |
| H | -4.31029933 | 2.42242519  | -3.72807328 |
| H | -5.03282938 | 1.14952009  | -4.72495936 |
| H | -3.39952626 | 1.73994714  | -5.09344339 |
| O | 1.16731409  | 0.33339603  | 1.44520411  |
| O | -0.30090302 | 0.54295104  | -2.56252820 |
| O | -0.49759504 | -0.87441107 | -2.02363715 |

Oxo  $\eta^3$ -Ozone Complex to Oxo Peroxo Complex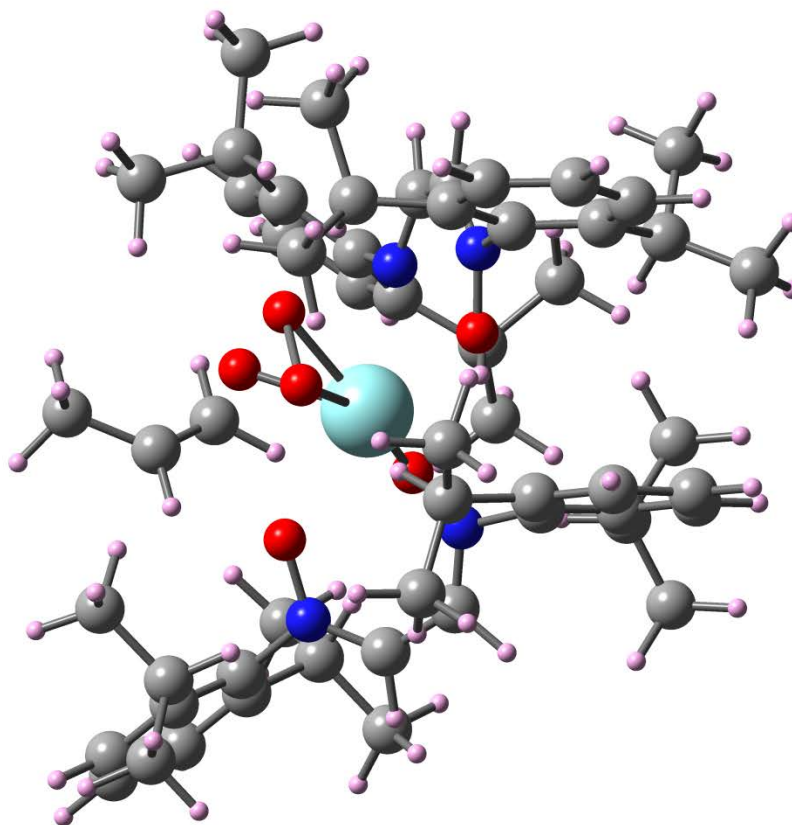Fig. S102: NCCNO Oxo  $\eta^3$ -Ozone Complex to Oxo Peroxo Complex

| SCF          | $E_{ZP}$     | H            | G            | imag freq<br>( $\text{cm}^{-1}$ ) |
|--------------|--------------|--------------|--------------|-----------------------------------|
| -2859.250587 | -2858.014156 | -2857.937999 | -2858.127412 | -393                              |

|    |             |             |             |
|----|-------------|-------------|-------------|
| Zr | 0.30624300  | 0.21489500  | -0.19580500 |
| O  | -1.98741100 | 0.06206300  | 0.19701200  |
| O  | 2.19562900  | -1.12523600 | -0.75787400 |
| O  | 1.41462200  | 1.52588100  | -1.52994300 |
| N  | -0.03671000 | -2.18070600 | 0.76019700  |
| N  | 2.91294700  | -1.89504000 | 0.05797400  |
| N  | -0.67853200 | 2.65329800  | 0.28429100  |
| N  | -2.97640900 | 0.78251500  | -0.35709000 |
| C  | 0.97372300  | -2.86914200 | 1.22479300  |
| C  | 2.38011400  | -2.67244700 | 0.98314800  |
| C  | -1.89340500 | 2.98690600  | -0.06190800 |
| C  | -2.95480400 | 2.09808600  | -0.46306100 |
| C  | -1.32152800 | -2.72406700 | 1.20272900  |
| C  | -1.70670700 | -2.55076100 | 2.55904500  |
| C  | -2.87318000 | -3.21616000 | 2.99410900  |
| C  | -3.62799100 | -4.00850200 | 2.11695600  |

|   |             |             |             |
|---|-------------|-------------|-------------|
| C | -3.24139700 | -4.13161400 | 0.77167100  |
| C | -2.08246300 | -3.49476900 | 0.28423900  |
| C | -1.79031600 | -0.55418600 | 4.14358300  |
| C | -0.91073500 | -1.68145600 | 3.54508400  |
| C | -0.29127000 | -2.53710600 | 4.68242000  |
| C | 5.27563500  | 0.91318000  | 2.20497800  |
| C | 4.62282700  | -0.47843200 | 2.00673300  |
| C | 4.82015200  | -1.33143100 | 3.29098200  |
| C | 4.36907100  | -1.88669500 | -0.15928800 |
| C | 5.18601000  | -1.20738300 | 0.77794800  |
| C | 6.57618100  | -1.23346900 | 0.53245700  |
| C | 7.10368800  | -1.88128300 | -0.59556500 |
| C | 6.25452000  | -2.52408200 | -1.51123500 |
| C | 4.85832200  | -2.54610300 | -1.31355200 |
| C | -2.77467000 | -3.91535200 | -2.15474100 |
| C | -1.61152000 | -3.68999100 | -1.16175600 |
| C | -0.61631600 | -4.88133400 | -1.26253400 |
| C | 3.77279900  | -2.34126400 | -3.59426000 |
| C | 3.93690600  | -3.22899100 | -2.33039300 |
| C | 4.42709700  | -4.65014900 | -2.70443300 |
| C | 0.21414400  | 3.76980000  | 0.54130500  |
| C | 0.47326800  | 4.72522900  | -0.48904600 |
| C | 1.36575600  | 5.77747900  | -0.18912200 |
| C | 1.96680700  | 5.89429800  | 1.07192400  |
| C | 1.67871200  | 4.95328000  | 2.07428200  |
| C | 0.80056400  | 3.87856900  | 1.83547500  |
| C | 0.95082500  | 4.60778500  | -3.00436300 |
| C | -0.13365600 | 4.67037800  | -1.90131000 |
| C | -1.08806000 | 5.87268300  | -2.14007200 |
| C | -5.71937100 | -0.92215600 | 2.58751900  |
| C | -5.00562400 | 0.05625000  | 1.62676300  |
| C | -5.56184200 | 1.49143500  | 1.86253000  |
| C | -4.17478300 | 0.05003300  | -0.82201500 |
| C | -5.13646500 | -0.33507600 | 0.14887400  |
| C | -6.27196300 | -1.02399000 | -0.31982000 |
| C | -6.44001500 | -1.29704500 | -1.68836800 |
| C | -5.48489300 | -0.86752800 | -2.61873800 |
| C | -4.32194900 | -0.17317000 | -2.21310500 |
| C | 1.49676500  | 2.69994600  | 4.01371200  |
| C | 0.39316600  | 2.92209700  | 2.95758000  |
| C | -0.91012000 | 3.42794000  | 3.63727700  |
| C | -2.88805100 | -0.73206200 | -4.26698000 |
| C | -3.34973400 | 0.35988800  | -3.27244400 |
| C | -4.00426600 | 1.54715600  | -4.03383100 |
| H | 0.77692600  | -3.72415200 | 1.87891800  |
| H | 3.07856200  | -3.27568800 | 1.54824100  |
| H | -2.18493300 | 4.04000600  | -0.08393700 |
| H | -3.84459800 | 2.54304500  | -0.88951200 |
| H | -3.18907800 | -3.11281500 | 4.02972400  |
| H | -4.51452500 | -4.52646300 | 2.47661800  |
| H | -3.84226000 | -4.73466500 | 0.09785700  |
| H | -0.09594100 | -1.18055600 | 3.01000500  |

|   |             |             |             |
|---|-------------|-------------|-------------|
| H | 3.54531500  | -0.31091600 | 1.87172700  |
| H | -2.64514100 | -0.95393300 | 4.70622500  |
| H | -2.17000000 | 0.10064800  | 3.35082900  |
| H | -1.19296500 | 0.06012200  | 4.83046700  |
| H | -1.06706400 | -3.04156400 | 5.27446300  |
| H | 0.29104800  | -1.90027300 | 5.36148400  |
| H | 0.37909500  | -3.31278000 | 4.28822500  |
| H | 6.33061200  | 0.83588700  | 2.50126900  |
| H | 4.74735100  | 1.45201000  | 3.00171300  |
| H | 5.21691300  | 1.51693300  | 1.29277900  |
| H | 4.32070300  | -2.30641100 | 3.22289900  |
| H | 4.40162500  | -0.80282600 | 4.15673600  |
| H | 5.88611800  | -1.51507500 | 3.48351100  |
| H | 7.24652800  | -0.72849700 | 1.22155000  |
| H | 8.17783500  | -1.87983400 | -0.76520000 |
| H | 6.67812200  | -3.01430200 | -2.38300600 |
| H | -1.08420300 | -2.77728400 | -1.46876200 |
| H | 2.93779400  | -3.33208400 | -1.89132900 |
| H | -3.26713200 | -4.88473000 | -1.99432100 |
| H | -2.38797300 | -3.91251600 | -3.18157800 |
| H | -3.53062500 | -3.12669400 | -2.07538500 |
| H | -1.10478700 | -5.82097900 | -0.96901400 |
| H | 0.26054600  | -4.74129600 | -0.61936500 |
| H | -0.26098400 | -4.98789700 | -2.29607100 |
| H | 3.31345300  | -1.38208300 | -3.33466300 |
| H | 3.11911800  | -2.83943500 | -4.32171100 |
| H | 4.74286800  | -2.15552500 | -4.07555200 |
| H | 5.38280400  | -4.62543000 | -3.24355100 |
| H | 3.69303400  | -5.13351800 | -3.36178300 |
| H | 4.55694000  | -5.28038300 | -1.81485100 |
| H | 1.59423500  | 6.51168700  | -0.95776000 |
| H | 2.64940600  | 6.71633900  | 1.27536900  |
| H | 2.13595800  | 5.05996200  | 3.05310900  |
| H | -0.70739800 | 3.74659100  | -2.01525200 |
| H | -3.94044700 | 0.05253500  | 1.88477500  |
| H | 1.63858300  | 5.46326500  | -2.96231000 |
| H | 0.47397800  | 4.60941900  | -3.99406700 |
| H | 1.51317800  | 3.67776200  | -2.90199500 |
| H | -1.88910900 | 5.92280600  | -1.38899700 |
| H | -1.55265300 | 5.79635900  | -3.13223000 |
| H | -0.54335900 | 6.82508300  | -2.09779100 |
| H | -6.81203300 | -0.85065500 | 2.50089600  |
| H | -5.45825200 | -0.67374400 | 3.62410700  |
| H | -5.41812700 | -1.95645000 | 2.40003300  |
| H | -5.04130600 | 2.24546000  | 1.26143100  |
| H | -5.44817500 | 1.76984300  | 2.91832700  |
| H | -6.62996700 | 1.53622900  | 1.61128900  |
| H | -7.02982400 | -1.34651200 | 0.38624000  |
| H | -7.32310500 | -1.83380300 | -2.02721200 |
| H | -5.63602700 | -1.06774700 | -3.67539700 |
| H | 0.21336100  | 1.94216800  | 2.50011000  |
| H | -2.43591400 | 0.72278000  | -2.79461200 |



|   |             |             |             |
|---|-------------|-------------|-------------|
| H | 1.70934400  | 3.60349100  | 4.60297800  |
| H | 2.42181900  | 2.35831600  | 3.53577700  |
| H | 1.17761400  | 1.91715000  | 4.71420900  |
| H | -1.23598200 | 2.71857900  | 4.40998000  |
| H | -1.72999100 | 3.53722200  | 2.91487500  |
| H | -0.75147700 | 4.40480600  | 4.11607100  |
| H | -2.30701300 | -1.49494500 | -3.74357100 |
| H | -2.22435400 | -0.27935600 | -5.01367500 |
| H | -3.72733900 | -1.20398300 | -4.79727400 |
| H | -4.32061600 | 2.35111300  | -3.35407700 |
| H | -4.88950200 | 1.22259300  | -4.59793200 |
| H | -3.28369000 | 1.97042300  | -4.74477100 |
| O | 1.21301100  | 0.31357100  | 1.44936400  |
| O | -0.35737800 | 0.97757800  | -2.17058100 |
| O | -0.28802300 | -0.52407500 | -2.19295800 |
| C | 3.10403500  | 2.29206500  | -0.50879100 |
| H | 2.92636400  | 1.82781900  | 0.45507400  |
| H | 3.00634000  | 3.37173300  | -0.57313800 |
| C | 3.45413100  | 1.54521300  | -1.62020100 |
| H | 3.58200500  | 0.47479300  | -1.50763500 |
| C | 3.81953500  | 2.11713100  | -2.96395900 |
| H | 3.74588800  | 3.20941400  | -2.98134600 |
| H | 4.84811900  | 1.83319300  | -3.23292900 |
| H | 3.15002800  | 1.70789500  | -3.73125200 |

## TS for Ligand Cyclization

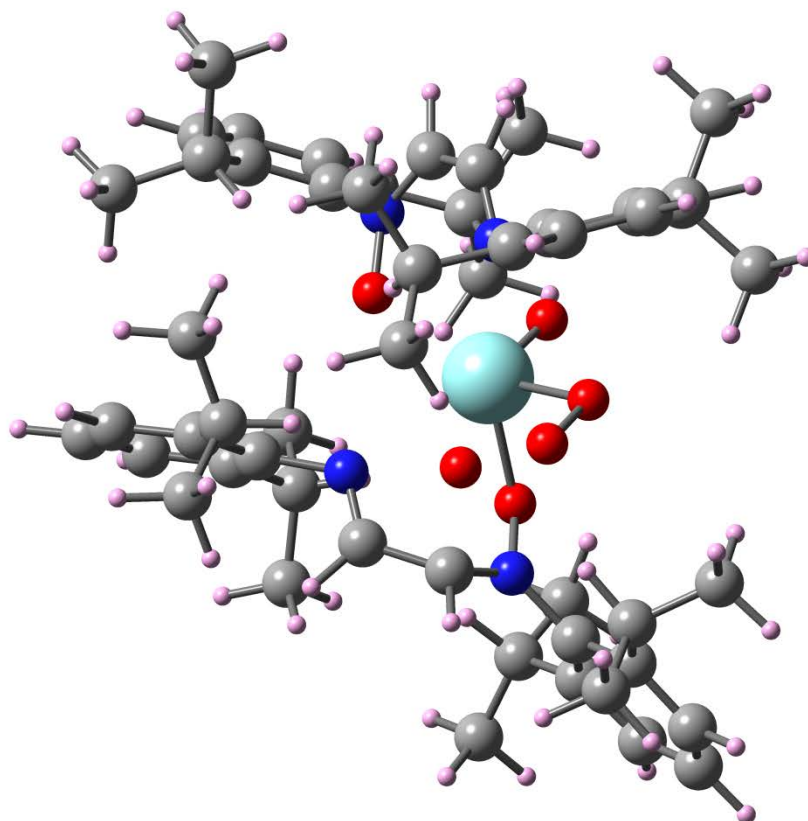

Fig. S103: NCCNO TS for Ligand Cyclization

| SCF          | $E_{ZP}$     | H            | G            | imag freq<br>( $\text{cm}^{-1}$ ) |
|--------------|--------------|--------------|--------------|-----------------------------------|
| -2741.391709 | -2740.237205 | -2740.166673 | -2740.344046 | -164                              |

|    |             |             |             |
|----|-------------|-------------|-------------|
| Zr | 0.44577500  | 0.30202800  | -0.52207300 |
| O  | -1.84978200 | 0.02181400  | -0.19708700 |
| O  | 1.87480100  | -1.31471500 | -0.70571500 |
| O  | 2.11912100  | 1.61737300  | -0.52167000 |
| N  | 0.05516700  | -1.45719500 | 1.44635000  |
| N  | 2.87346500  | -1.43323300 | 0.27873600  |
| N  | -0.59342300 | 2.62006600  | -0.39831100 |
| N  | -2.77761300 | 0.59442400  | -0.98392500 |
| C  | 1.18847700  | -1.65376400 | 2.05062000  |
| C  | 2.49302800  | -1.15257100 | 1.54959500  |
| C  | -1.73314700 | 2.84291800  | -0.99561200 |
| C  | -2.72995000 | 1.85791900  | -1.36276100 |
| C  | -1.12229000 | -2.06642700 | 2.05305500  |
| C  | -1.64638100 | -1.53527900 | 3.26409500  |
| C  | -2.73328400 | -2.20833500 | 3.86246200  |
| C  | -3.29490000 | -3.35261900 | 3.27890200  |

|   |             |             |             |
|---|-------------|-------------|-------------|
| C | -2.78278800 | -3.83617300 | 2.06504700  |
| C | -1.69453800 | -3.20609400 | 1.42792400  |
| C | -2.21425500 | 0.77381600  | 4.17350500  |
| C | -1.09356800 | -0.27106400 | 3.93639800  |
| C | -0.38059400 | -0.60474700 | 5.27468800  |
| C | 5.85954200  | 1.45867000  | -0.08119500 |
| C | 5.32206900  | 0.30663100  | 0.80597500  |
| C | 6.11281100  | 0.21688600  | 2.13904800  |
| C | 4.19452200  | -1.83441500 | -0.18040700 |
| C | 5.34237900  | -1.02848200 | 0.05890700  |
| C | 6.58399500  | -1.49382100 | -0.42876800 |
| C | 6.68954900  | -2.68692100 | -1.15268900 |
| C | 5.54251600  | -3.46105500 | -1.38243800 |
| C | 4.28268800  | -3.06858500 | -0.88975900 |
| C | -2.20142600 | -4.14310300 | -0.89909200 |
| C | -1.11155200 | -3.80373900 | 0.14556700  |
| C | -0.27039200 | -5.06611800 | 0.47794100  |
| C | 2.61681800  | -3.87290400 | -2.62189500 |
| C | 3.07689300  | -3.97959300 | -1.14340800 |
| C | 3.37152600  | -5.45176400 | -0.75591800 |
| C | 0.22599500  | 3.81766000  | -0.18271100 |
| C | 0.83487500  | 4.44937000  | -1.30193900 |
| C | 1.55965400  | 5.63473200  | -1.06082700 |
| C | 1.68515400  | 6.16765800  | 0.23042600  |
| C | 1.09909800  | 5.50447100  | 1.31848600  |
| C | 0.36927100  | 4.31235500  | 1.13692000  |
| C | 2.23391900  | 3.58496800  | -3.23680700 |
| C | 0.79826200  | 3.87410000  | -2.72455400 |
| C | 0.03935700  | 4.81184100  | -3.70045300 |
| C | -5.64705800 | -0.51040500 | 1.97537800  |
| C | -5.05006300 | 0.35154600  | 0.83800800  |
| C | -5.84807800 | 1.67865200  | 0.69448900  |
| C | -3.91256700 | -0.25481500 | -1.40189800 |
| C | -5.00090200 | -0.38670700 | -0.50438000 |
| C | -6.08282500 | -1.18241600 | -0.93216300 |
| C | -6.06608700 | -1.80790700 | -2.19024400 |
| C | -4.96994000 | -1.64742300 | -3.05061700 |
| C | -3.85411900 | -0.86462700 | -2.67899600 |
| C | 0.69673700  | 3.43961800  | 3.51385700  |
| C | -0.29239500 | 3.63205400  | 2.33824600  |
| C | -1.54964100 | 4.42701600  | 2.78669300  |
| C | -2.20948800 | -1.98638800 | -4.29348500 |
| C | -2.68695700 | -0.66100600 | -3.65112800 |
| C | -3.08319600 | 0.35520300  | -4.75827800 |
| H | 1.23671200  | -2.22808900 | 2.98224300  |
| H | 3.29888500  | -1.16920000 | 2.27710700  |
| H | -2.00352300 | 3.86303000  | -1.28129700 |
| H | -3.55576800 | 2.18810300  | -1.98017600 |
| H | -3.14354200 | -1.83150200 | 4.79614000  |
| H | -4.12429300 | -3.86193300 | 3.76393200  |
| H | -3.22573700 | -4.71964100 | 1.61302100  |
| H | -0.35357400 | 0.19353500  | 3.27569600  |

|   |             |             |             |
|---|-------------|-------------|-------------|
| H | 4.29535900  | 0.58139300  | 1.03885600  |
| H | -2.98269100 | 0.39685100  | 4.86041600  |
| H | -2.70482900 | 1.04517300  | 3.23022200  |
| H | -1.79285600 | 1.68517500  | 4.61516400  |
| H | -1.07587000 | -1.06214000 | 5.99105000  |
| H | 0.02582600  | 0.30785400  | 5.72994900  |
| H | 0.45067500  | -1.30614700 | 5.12629800  |
| H | 6.90900600  | 1.30672700  | -0.36780100 |
| H | 5.78866400  | 2.40908700  | 0.46337300  |
| H | 5.25720600  | 1.54997100  | -0.99193300 |
| H | 5.72459900  | -0.57825100 | 2.79186700  |
| H | 6.04163100  | 1.16794500  | 2.68287900  |
| H | 7.17657800  | 0.00726200  | 1.96363200  |
| H | 7.47354400  | -0.89483700 | -0.25252600 |
| H | 7.65454700  | -3.01209900 | -1.53436000 |
| H | 5.62834900  | -4.38967900 | -1.93984200 |
| H | -0.43854000 | -3.06668700 | -0.30671500 |
| H | 2.24291300  | -3.63107900 | -0.52842600 |
| H | -2.86236100 | -4.94952100 | -0.55446700 |
| H | -1.73123900 | -4.48220300 | -1.83142100 |
| H | -2.82082900 | -3.26778400 | -1.12428400 |
| H | -0.89503800 | -5.83910600 | 0.94566300  |
| H | 0.54989100  | -4.83403800 | 1.16960800  |
| H | 0.16556500  | -5.48655600 | -0.43692100 |
| H | 2.33564800  | -2.84090900 | -2.85350800 |
| H | 1.74617800  | -4.51997500 | -2.79967300 |
| H | 3.41603400  | -4.18509100 | -3.30825100 |
| H | 4.14177100  | -5.89958400 | -1.39666800 |
| H | 2.46257100  | -6.05724800 | -0.86748500 |
| H | 3.71150000  | -5.53330000 | 0.28508100  |
| H | 2.04432900  | 6.13519900  | -1.89521100 |
| H | 2.24655800  | 7.08546400  | 0.38887000  |
| H | 1.21105600  | 5.91368300  | 2.31894100  |
| H | 0.28955100  | 2.90506300  | -2.71600600 |
| H | -4.02359600 | 0.60073100  | 1.13283700  |
| H | 2.82400100  | 4.50602400  | -3.34265000 |
| H | 2.18652800  | 3.09732100  | -4.21957600 |
| H | 2.74785900  | 2.91362500  | -2.54157400 |
| H | -0.99584200 | 4.99126900  | -3.37541300 |
| H | 0.00900100  | 4.36726000  | -4.70402300 |
| H | 0.53253500  | 5.78983400  | -3.78157800 |
| H | -6.71180200 | -0.72164100 | 1.81138600  |
| H | -5.56356700 | 0.02688200  | 2.92875500  |
| H | -5.11323600 | -1.46092300 | 2.07442600  |
| H | -5.41667700 | 2.33601600  | -0.07133800 |
| H | -5.85184000 | 2.22521900  | 1.64647100  |
| H | -6.89007600 | 1.47662500  | 0.41389700  |
| H | -6.94007900 | -1.31537300 | -0.27940600 |
| H | -6.91092200 | -2.41863700 | -2.49966900 |
| H | -4.97217200 | -2.13627600 | -4.02028800 |
| H | -0.62097600 | 2.63283700  | 2.02687900  |
| H | -1.82011800 | -0.24968400 | -3.11975100 |

|   |             |             |             |
|---|-------------|-------------|-------------|
| H | 1.04276700  | 4.40047900  | 3.91641200  |
| H | 1.56691000  | 2.86257900  | 3.18606700  |
| H | 0.20981300  | 2.89653300  | 4.33518300  |
| H | -2.05043600 | 3.92460200  | 3.62473400  |
| H | -2.27412200 | 4.52899300  | 1.96690200  |
| H | -1.27401300 | 5.43855400  | 3.11340600  |
| H | -1.94654200 | -2.72568700 | -3.52908300 |
| H | -1.31086700 | -1.79099200 | -4.89063800 |
| H | -2.96557800 | -2.42829700 | -4.95736700 |
| H | -3.37422600 | 1.32740900  | -4.33742100 |
| H | -3.92443700 | -0.01433700 | -5.36115900 |
| H | -2.22880900 | 0.52408200  | -5.42502500 |
| O | 2.53204100  | 1.71446200  | 0.91047400  |
| O | 1.77482600  | 0.63923700  | 1.60832800  |
| O | 0.02041600  | 0.37652800  | -2.29237000 |

## 8. NCCNO Triplet Transition States

## Oxo Peroxo Complex to Dioxo Complex

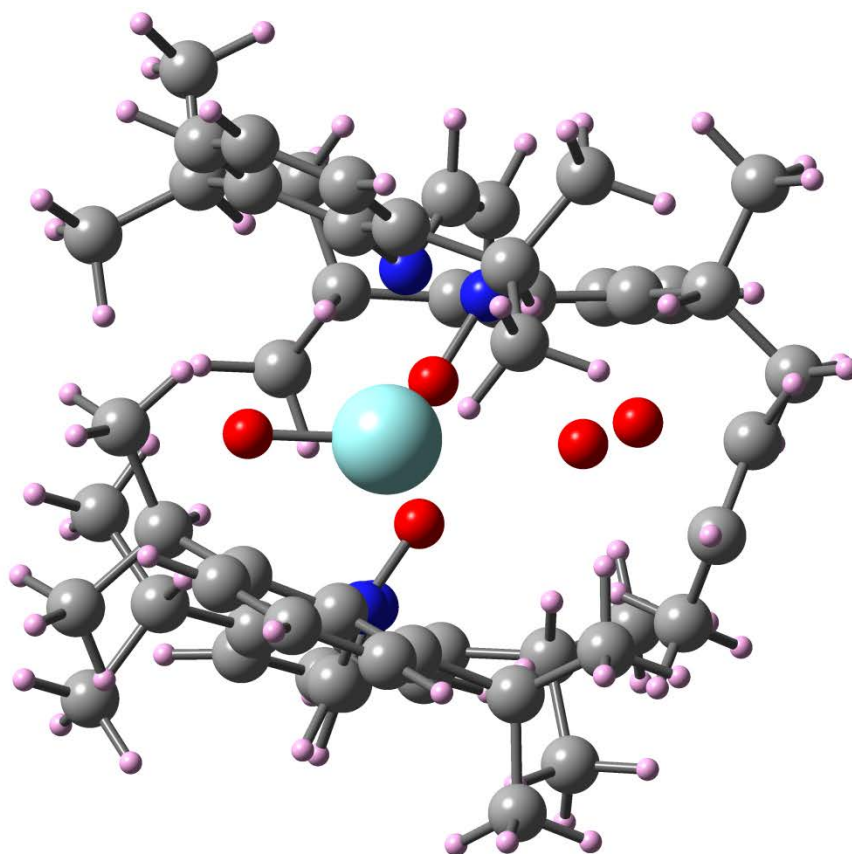

Fig. S104: NCCNO Oxo Peroxo Complex to Dioxo Complex

| SCF          | E <sub>ZP</sub> | H            | G            | imag freq (cm <sup>-1</sup> ) |
|--------------|-----------------|--------------|--------------|-------------------------------|
| -2784.099789 | -2782.867471    | -2782.792810 | -2782.981144 | -125                          |

|    |             |             |             |
|----|-------------|-------------|-------------|
| Zr | -0.11492831 | 0.13193385  | -0.25975422 |
| O  | 2.01694570  | 0.40342491  | -0.08293213 |
| O  | -1.95643358 | -0.70370910 | 0.46209474  |
| O  | -0.41660228 | -0.10385159 | 3.22039451  |
| O  | 0.52065185  | -0.44965732 | 2.16504029  |
| N  | 0.18060951  | -2.09819472 | -1.00177004 |
| N  | -2.79395738 | -1.53424390 | -0.29638932 |
| N  | -0.07965418 | 2.33346988  | 0.45235199  |
| N  | 2.80786177  | 1.28039768  | 0.64099432  |
| C  | -0.91905384 | -2.84256551 | -1.28798954 |
| C  | -2.26883009 | -2.57556171 | -1.00379093 |
| C  | 1.01480750  | 2.97238430  | 0.93890025  |
| C  | 2.32242101  | 2.48524265  | 1.06206596  |

|   |             |             |             |
|---|-------------|-------------|-------------|
| C | 1.40770894  | -2.58149766 | -1.62585409 |
| C | 1.59718618  | -2.41430292 | -3.02917555 |
| C | 2.77667384  | -2.93194579 | -3.60981124 |
| C | 3.74909237  | -3.58149086 | -2.83852327 |
| C | 3.55440640  | -3.72518706 | -1.45527128 |
| C | 2.39021112  | -3.23695874 | -0.82980727 |
| C | 1.22778460  | -0.49794126 | -4.66856424 |
| C | 0.58329306  | -1.70073646 | -3.93352177 |
| C | -0.05295828 | -2.68594726 | -4.94950632 |
| C | -4.34726630 | 1.62403935  | -2.57318667 |
| C | -4.03393806 | 0.12075551  | -2.37523247 |
| C | -4.30228233 | -0.66955589 | -3.68526364 |
| C | -4.21913960 | -1.28000980 | -0.21015276 |
| C | -4.82863846 | -0.48499599 | -1.21561363 |
| C | -6.22507870 | -0.29167134 | -1.13166911 |
| C | -6.97563302 | -0.85230882 | -0.08728072 |
| C | -6.34421460 | -1.62160301 | 0.90393154  |
| C | -4.95319150 | -1.84587973 | 0.86448697  |
| C | 3.44828917  | -3.49380814 | 1.50251044  |
| C | 2.15159949  | -3.47736360 | 0.66209824  |
| C | 1.36378810  | -4.80154464 | 0.87064312  |
| C | -4.64343976 | -2.25284440 | 3.36665483  |
| C | -4.27957582 | -2.71204973 | 1.93192709  |
| C | -4.63445418 | -4.21061335 | 1.73233437  |
| C | -1.22150601 | 3.20205366  | 0.18122567  |
| C | -2.27948508 | 3.29896356  | 1.12759210  |
| C | -3.36149609 | 4.16015498  | 0.84673327  |
| C | -3.40074326 | 4.91318951  | -0.33573228 |
| C | -2.34830618 | 4.81092894  | -1.25775062 |
| C | -1.24640560 | 3.96107744  | -1.02578535 |
| C | -3.54253215 | 1.77291092  | 2.74995983  |
| C | -2.23636735 | 2.55131040  | 2.46187494  |
| C | -1.90649066 | 3.52876130  | 3.62299963  |
| C | 4.91064961  | 0.33906556  | -2.88764879 |
| C | 4.48155597  | 1.30876296  | -1.76054539 |
| C | 4.93118381  | 2.76130277  | -2.08309133 |
| C | 4.20553358  | 0.91676490  | 0.77921545  |
| C | 5.01683531  | 0.89015656  | -0.38737540 |
| C | 6.37442167  | 0.54474103  | -0.23029898 |
| C | 6.90776101  | 0.25047720  | 1.03486816  |
| C | 6.08850721  | 0.29828280  | 2.17238562  |
| C | 4.71831178  | 0.62255463  | 2.07098374  |
| C | -0.63551534 | 3.51729993  | -3.46657321 |
| C | -0.11639571 | 3.91076768  | -2.06093238 |
| C | 0.65237277  | 5.25931519  | -2.10351271 |
| C | 3.98149990  | -0.60343093 | 4.19309768  |
| C | 3.85902778  | 0.68443186  | 3.34009523  |
| C | 4.23191965  | 1.92664457  | 4.19516591  |
| H | -0.76786800 | -3.75838015 | -1.86314971 |
| H | -3.01178067 | -3.24900203 | -1.41628941 |
| H | 0.89669041  | 4.01470427  | 1.24223793  |
| H | 3.06949982  | 3.13623661  | 1.49969398  |

|   |             |             |             |
|---|-------------|-------------|-------------|
| H | 2.93292567  | -2.81705723 | -4.67996037 |
| H | 4.65012941  | -3.97118692 | -3.30717387 |
| H | 4.31388615  | -4.22567865 | -0.86145410 |
| H | -0.21089743 | -1.27713358 | -3.31446983 |
| H | -2.96331662 | 0.05096009  | -2.15797136 |
| H | 2.04340699  | -0.80894248 | -5.33691454 |
| H | 1.61907684  | 0.22347189  | -3.94293603 |
| H | 0.46989509  | 0.01768013  | -5.27278377 |
| H | 0.70178789  | -3.11223959 | -5.62493561 |
| H | -0.79955992 | -2.16546004 | -5.56471555 |
| H | -0.55372198 | -3.52076177 | -4.44094543 |
| H | -5.38461272 | 1.79279151  | -2.89550649 |
| H | -3.68460722 | 2.03528187  | -3.34414366 |
| H | -4.17420973 | 2.19094069  | -1.65157830 |
| H | -4.03071493 | -1.72790637 | -3.57857441 |
| H | -3.70369879 | -0.24877594 | -4.50327699 |
| H | -5.36168591 | -0.61783462 | -3.97399780 |
| H | -6.72469209 | 0.30739958  | -1.88786400 |
| H | -8.05023283 | -0.68926676 | -0.04374377 |
| H | -6.93690349 | -2.04907748 | 1.70894642  |
| H | 1.53087365  | -2.65085149 | 1.02574340  |
| H | -3.19689997 | -2.60227755 | 1.81142047  |
| H | 4.07588202  | -4.36495742 | 1.27187234  |
| H | 3.20004996  | -3.55271913 | 2.57172581  |
| H | 4.04285140  | -2.58806621 | 1.33473897  |
| H | 1.93217993  | -5.65364077 | 0.47395300  |
| H | 0.39453182  | -4.77328335 | 0.35934975  |
| H | 1.18317257  | -4.98613557 | 1.93964204  |
| H | -4.40329165 | -1.19223421 | 3.51251735  |
| H | -4.09544413 | -2.85067490 | 4.10986182  |
| H | -5.71269404 | -2.38455001 | 3.57499889  |
| H | -5.71601199 | -4.37448647 | 1.82554306  |
| H | -4.13214234 | -4.83338282 | 2.48585192  |
| H | -4.32557271 | -4.56232833 | 0.74031315  |
| H | -4.17519343 | 4.24706079  | 1.56302796  |
| H | -4.24093948 | 5.57447697  | -0.53587061 |
| H | -2.38195777 | 5.39777505  | -2.17272414 |
| H | -1.42675858 | 1.81932456  | 2.41337064  |
| H | 3.38926616  | 1.29281417  | -1.72288359 |
| H | -4.40918837 | 2.44110949  | 2.84094529  |
| H | -3.45133256 | 1.22342817  | 3.69901005  |
| H | -3.74398752 | 1.05027471  | 1.95188481  |
| H | -0.94968758 | 4.03882914  | 3.45143659  |
| H | -1.83937317 | 2.98718447  | 4.57799063  |
| H | -2.68259185 | 4.29921958  | 3.72675162  |
| H | 5.99785877  | 0.34743043  | -3.04597236 |
| H | 4.43825881  | 0.63764702  | -3.83244550 |
| H | 4.59923883  | -0.68729832 | -2.66560139 |
| H | 4.58587146  | 3.46692906  | -1.31638901 |
| H | 4.51600994  | 3.07964660  | -3.04851867 |
| H | 6.02589675  | 2.83339999  | -2.14294413 |
| H | 7.02119465  | 0.51521738  | -1.10265196 |



|   |             |             |             |
|---|-------------|-------------|-------------|
| H | 7.95917090  | -0.00970720 | 1.13372457  |
| H | 6.51539661  | 0.07387072  | 3.14655938  |
| H | 0.58653403  | 3.12847031  | -1.76409630 |
| H | 2.81004141  | 0.77566010  | 3.03978695  |
| H | -1.39009800 | 4.22320489  | -3.84039413 |
| H | -1.06093895 | 2.50970662  | -3.42529655 |
| H | 0.19763713  | 3.50830317  | -4.18368344 |
| H | 1.48548908  | 5.19899785  | -2.81713092 |
| H | 1.06342986  | 5.51894897  | -1.11861959 |
| H | -0.00278964 | 6.08243781  | -2.41986189 |
| H | 3.67515416  | -1.48490986 | 3.61981763  |
| H | 3.34597074  | -0.52444205 | 5.08776552  |
| H | 5.00783307  | -0.76793142 | 4.54488547  |
| H | 4.12427212  | 2.85701870  | 3.62436940  |
| H | 5.27192961  | 1.86766586  | 4.54273446  |
| H | 3.58307411  | 1.99569068  | 5.07923271  |
| O | -0.64315793 | 0.58604414  | -1.94700116 |
| C | -0.98101241 | -1.64812418 | 4.12152512  |
| H | -2.02660206 | -1.44568735 | 4.33165487  |
| C | 0.01717581  | -0.66008094 | 4.58028979  |
| H | -0.25531774 | 0.05212222  | 5.35661914  |
| H | 1.06870474  | -0.93527189 | 4.55380736  |
| C | -0.56809265 | -2.80867877 | 3.31461280  |
| H | -0.10601731 | -2.37071445 | 2.39377781  |
| H | 0.22799091  | -3.39299767 | 3.79321090  |
| H | -1.39969310 | -3.45329478 | 3.02748456  |

### Oxo Complex with weakly adsorbed O<sub>2</sub> molecule to Oxo Peroxo Complex

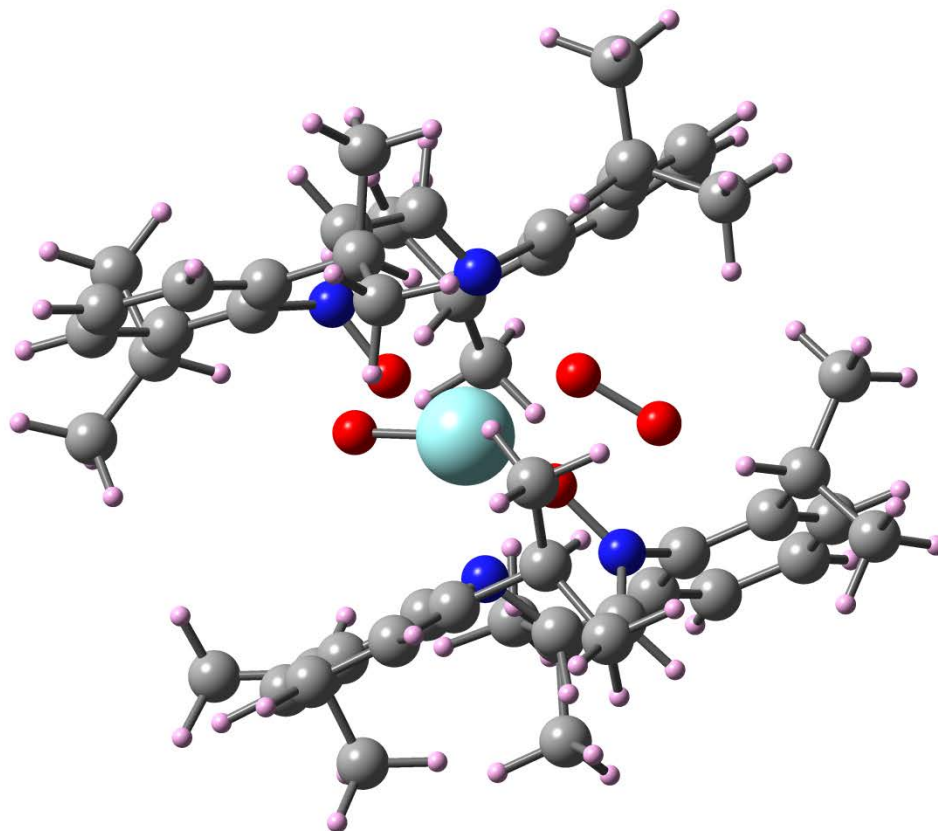

Fig. S105: NCCNO Oxo Complex with weakly adsorbed O<sub>2</sub> molecule to Oxo Peroxo Complex

| SCF          | E <sub>ZP</sub> | H            | G            | imag freq (cm <sup>-1</sup> ) |
|--------------|-----------------|--------------|--------------|-------------------------------|
| -2666.243621 | -2665.093622    | -2665.024225 | -2665.199364 | -223                          |

|    |             |             |             |
|----|-------------|-------------|-------------|
| Zr | -0.02223145 | -0.17050223 | -0.24501654 |
| O  | -2.17886191 | 0.39389488  | 0.14836515  |
| O  | 2.05150507  | -0.55051681 | -0.34722818 |
| O  | -0.58212790 | -0.47054595 | -1.96617285 |
| N  | -0.00207595 | -2.16073699 | 0.83889145  |
| N  | 2.91975236  | -1.27615647 | 0.46192945  |
| N  | -0.02628899 | 2.21827835  | -0.78280277 |
| N  | -2.93066346 | 1.23243956  | -0.57829741 |
| C  | 1.11390850  | -2.67404652 | 1.42472119  |
| C  | 2.44283318  | -2.26470138 | 1.26970482  |
| C  | -1.12246281 | 2.86697391  | -1.09013667 |
| C  | -2.47004818 | 2.35124687  | -1.12478120 |
| C  | -1.23906386 | -2.88792362 | 1.10054270  |
| C  | -1.90975116 | -2.71468252 | 2.34281835  |
| C  | -3.11624751 | -3.41931383 | 2.55033343  |

|   |             |             |             |
|---|-------------|-------------|-------------|
| C | -3.63930800 | -4.27065472 | 1.56755576  |
| C | -2.94895889 | -4.44882513 | 0.35667055  |
| C | -1.73784683 | -3.77442757 | 0.10069187  |
| C | -2.35937531 | -0.71123818 | 3.86102592  |
| C | -1.35944707 | -1.82516182 | 3.46447986  |
| C | -0.97121562 | -2.67493168 | 4.70460738  |
| C | 4.65010087  | 1.97869746  | 2.39533500  |
| C | 4.35412907  | 0.45954940  | 2.34149582  |
| C | 4.76859718  | -0.22473753 | 3.67265321  |
| C | 4.33868444  | -1.05189548 | 0.24741001  |
| C | 5.03938496  | -0.21652142 | 1.15158207  |
| C | 6.42588120  | -0.04953380 | 0.93922362  |
| C | 7.07291236  | -0.67682271 | -0.13517452 |
| C | 6.34935301  | -1.49236015 | -1.02252899 |
| C | 4.96599139  | -1.69906452 | -0.85188464 |
| C | -1.81704736 | -4.43064307 | -2.39276645 |
| C | -0.93913481 | -4.05157439 | -1.17882891 |
| C | 0.10936129  | -5.17162791 | -0.92445964 |
| C | 4.62475411  | -2.53212010 | -3.26066251 |
| C | 4.19016372  | -2.64206469 | -1.77924341 |
| C | 4.33361395  | -4.11213234 | -1.29242851 |
| C | 1.20351625  | 3.00800911  | -0.76652995 |
| C | 2.13549847  | 2.80409342  | -1.82238049 |
| C | 3.31696931  | 3.57138506  | -1.81183959 |
| C | 3.56654323  | 4.50815195  | -0.79693019 |
| C | 2.62580928  | 4.69934412  | 0.22453828  |
| C | 1.42202300  | 3.96279814  | 0.26768614  |
| C | 3.05080354  | 1.03146872  | -3.43426621 |
| C | 1.83135109  | 1.87719542  | -3.00411216 |
| C | 1.28740864  | 2.70809170  | -4.20018048 |
| C | -5.33228498 | 1.35651207  | 2.92751941  |
| C | -4.71865710 | 1.95027097  | 1.63577151  |
| C | -5.01017234 | 3.47482325  | 1.54988741  |
| C | -4.36113089 | 0.89872152  | -0.70055002 |
| C | -5.21823473 | 1.23891319  | 0.37363754  |
| C | -6.58717120 | 0.94401452  | 0.20976183  |
| C | -7.05939267 | 0.33545765  | -0.96430774 |
| C | -6.17357943 | 0.00526259  | -2.00110789 |
| C | -4.79120283 | 0.27409193  | -1.89652689 |
| C | 1.08580247  | 4.07162823  | 2.80124603  |
| C | 0.42963102  | 4.23660019  | 1.40665593  |
| C | -0.19687682 | 5.65069040  | 1.26004206  |
| C | -4.13960379 | -1.46499685 | -3.65255769 |
| C | -3.84096481 | -0.07057769 | -3.04962095 |
| C | -3.92675662 | 1.00885383  | -4.16585919 |
| H | 0.98077866  | -3.52684303 | 2.09128508  |
| H | 3.20905601  | -2.78966053 | 1.82681575  |
| H | -1.05522371 | 3.92006689  | -1.37400290 |
| H | -3.22207746 | 2.96334723  | -1.60636465 |
| H | -3.64650566 | -3.29870237 | 3.49240456  |
| H | -4.57258259 | -4.80095735 | 1.74466580  |
| H | -3.35430920 | -5.12385022 | -0.39147625 |

|   |             |             |             |
|---|-------------|-------------|-------------|
| H | -0.45368005 | -1.32217345 | 3.11518108  |
| H | 3.27056976  | 0.34554901  | 2.23927342  |
| H | -3.29671977 | -1.12735233 | 4.25614869  |
| H | -2.59341162 | -0.08296043 | 2.99502736  |
| H | -1.91816107 | -0.07111017 | 4.63625155  |
| H | -1.84688627 | -3.17803933 | 5.13711038  |
| H | -0.53171784 | -2.03345690 | 5.48006450  |
| H | -0.23626557 | -3.44925131 | 4.44717661  |
| H | 5.71384532  | 2.18207267  | 2.58064348  |
| H | 4.07458490  | 2.43715701  | 3.20925545  |
| H | 4.36291811  | 2.47135202  | 1.45949224  |
| H | 4.51579936  | -1.29301464 | 3.67068398  |
| H | 4.24407527  | 0.24427981  | 4.51481020  |
| H | 5.84940222  | -0.13403250 | 3.84821198  |
| H | 6.99717318  | 0.57999868  | 1.61614814  |
| H | 8.14092117  | -0.53271719 | -0.28321051 |
| H | 6.86549837  | -1.97042661 | -1.85002075 |
| H | -0.39945422 | -3.13630541 | -1.44607645 |
| H | 3.12961216  | -2.37155918 | -1.72963100 |
| H | -2.28080592 | -5.41988662 | -2.27481879 |
| H | -1.19773801 | -4.46380061 | -3.29854292 |
| H | -2.61035688 | -3.69365308 | -2.55318592 |
| H | -0.38743450 | -6.11075149 | -0.64378091 |
| H | 0.80333367  | -4.90035188 | -0.12114733 |
| H | 0.69837310  | -5.35492508 | -1.83383899 |
| H | 4.58027791  | -1.49683761 | -3.61608116 |
| H | 3.95604696  | -3.13634678 | -3.88732984 |
| H | 5.64545895  | -2.90603716 | -3.41676468 |
| H | 5.38417726  | -4.43152805 | -1.32115161 |
| H | 3.75340109  | -4.78436779 | -1.93832682 |
| H | 3.96873339  | -4.23368958 | -0.26573585 |
| H | 4.04385897  | 3.43771366  | -2.60770023 |
| H | 4.48604717  | 5.08868708  | -0.80565638 |
| H | 2.82669828  | 5.42833986  | 1.00518829  |
| H | 1.04040510  | 1.17490378  | -2.72139814 |
| H | -3.63318852 | 1.81775107  | 1.70672798  |
| H | 3.85768143  | 1.64730061  | -3.85484112 |
| H | 2.74445558  | 0.31349801  | -4.20615339 |
| H | 3.44558824  | 0.47103642  | -2.58081214 |
| H | 0.38735788  | 3.27304218  | -3.92148400 |
| H | 1.02462673  | 2.04267005  | -5.03277686 |
| H | 2.03812629  | 3.42667069  | -4.55683001 |
| H | -6.40980051 | 1.55484814  | 2.99497073  |
| H | -4.85724125 | 1.80967735  | 3.80665193  |
| H | -5.17654178 | 0.27359604  | 2.97835617  |
| H | -4.53593634 | 3.93082319  | 0.67093485  |
| H | -4.62784868 | 3.98507003  | 2.44331520  |
| H | -6.08978035 | 3.66374107  | 1.48461953  |
| H | -7.28508349 | 1.18810855  | 1.00504440  |
| H | -8.11913949 | 0.11561748  | -1.06927366 |
| H | -6.55427685 | -0.47484944 | -2.89735800 |
| H | -0.37069132 | 3.49241816  | 1.36675971  |

|   |             |             |             |
|---|-------------|-------------|-------------|
| H | -2.80445938 | -0.09987532 | -2.68914247 |
| H | 1.93042760  | 4.75978760  | 2.94077945  |
| H | 1.43163524  | 3.04276142  | 2.94160465  |
| H | 0.34730303  | 4.28797886  | 3.58546449  |
| H | -0.93395725 | 5.82369157  | 2.05574417  |
| H | -0.70228908 | 5.77808585  | 0.29239618  |
| H | 0.56857534  | 6.43438862  | 1.33617419  |
| H | -4.17624999 | -2.23487826 | -2.87409032 |
| H | -3.34355999 | -1.73440044 | -4.35706955 |
| H | -5.09165279 | -1.48404472 | -4.20038051 |
| H | -3.65739919 | 2.00705926  | -3.79653350 |
| H | -4.94156856 | 1.06751762  | -4.58286449 |
| H | -3.23481665 | 0.75734988  | -4.97941534 |
| O | 0.05324618  | 1.04609773  | 1.72981201  |
| O | 0.96894348  | 0.62687039  | 2.66833702  |

## 9. ONCCNO Singlet Ground States

### 9.1 Structures with four oxygen atoms

#### Bare Complex (conformation 1 higher energy with distorted N-O bonds)

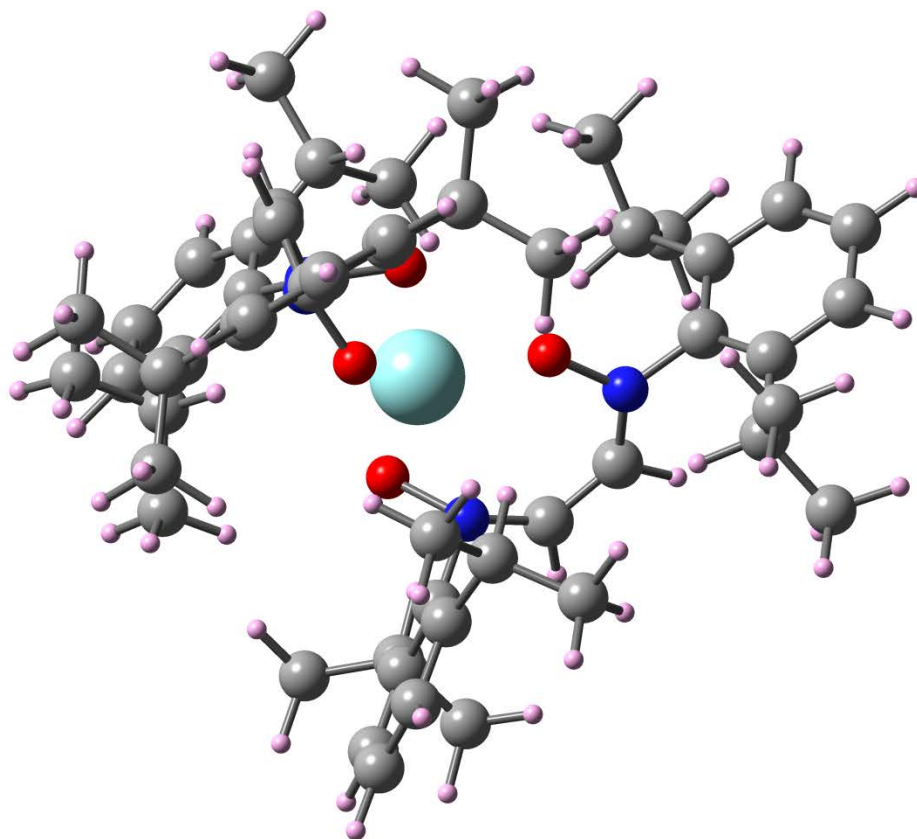

Fig. S106: ONCCNO Bare Complex (conformation 1 higher energy with distorted N-O bonds)

| SCF          | $E_{ZP}$     | H            | G            |
|--------------|--------------|--------------|--------------|
| -2591.055276 | -2589.906171 | -2589.838037 | -2590.011783 |

|    |             |             |             |
|----|-------------|-------------|-------------|
| Zr | -0.09258087 | -0.40947889 | -0.05958153 |
| O  | -1.12222367 | 1.33101839  | -0.30657235 |
| O  | 1.89036933  | 0.05629461  | -0.32246230 |
| O  | -0.16381149 | -1.56931331 | -1.74008283 |
| O  | -0.52125487 | -1.74171565 | 1.43789793  |
| N  | 0.60066204  | -0.87897064 | 2.10139211  |
| N  | 3.05570013  | -0.54389395 | 0.23047524  |
| N  | -1.65588680 | -1.20848877 | -1.57626191 |
| N  | -1.85074021 | 1.87282926  | -1.41358554 |
| C  | 1.87532181  | -1.54208556 | 2.18505424  |
| C  | 2.94304626  | -1.32164944 | 1.34727722  |
| C  | -2.12010654 | -0.30613922 | -2.59548250 |
| C  | -2.19246410 | 1.05619388  | -2.46238241 |

|   |             |             |             |
|---|-------------|-------------|-------------|
| C | 0.08595009  | -0.37542772 | 3.38710595  |
| C | 0.14418402  | 1.02166979  | 3.64141577  |
| C | -0.37750552 | 1.49732001  | 4.86446261  |
| C | -0.92376983 | 0.62315302  | 5.81208316  |
| C | -0.92882671 | -0.75698909 | 5.56073408  |
| C | -0.42113656 | -1.29017493 | 4.35851155  |
| C | -0.09167712 | 3.21837193  | 2.33565201  |
| C | 0.82510957  | 2.02629111  | 2.70470346  |
| C | 2.14659613  | 2.53074842  | 3.34767325  |
| C | 5.16628255  | 2.96349651  | 0.60213854  |
| C | 5.03273846  | 1.47263886  | 1.00507446  |
| C | 6.01717406  | 1.12177533  | 2.15221794  |
| C | 4.25202271  | -0.42083217 | -0.56879592 |
| C | 5.22684261  | 0.54330400  | -0.19484734 |
| C | 6.40888191  | 0.62207985  | -0.96108960 |
| C | 6.60210532  | -0.20800531 | -2.07604195 |
| C | 5.61340335  | -1.13340000 | -2.44578442 |
| C | 4.42094222  | -1.25984734 | -1.70290468 |
| C | -1.79246657 | -3.45925339 | 4.39277873  |
| C | -0.39436241 | -2.81921848 | 4.20005668  |
| C | 0.61922770  | -3.44661990 | 5.19779430  |
| C | 2.82596296  | -1.95500296 | -3.55054915 |
| C | 3.36525487  | -2.28014644 | -2.13335182 |
| C | 3.91763828  | -3.72825265 | -2.06678813 |
| C | -2.49224337 | -2.40666840 | -1.38986415 |
| C | -3.53665089 | -2.32732830 | -0.42592858 |
| C | -4.31865978 | -3.47804683 | -0.19766396 |
| C | -4.08801680 | -4.66605943 | -0.90517975 |
| C | -3.09461681 | -4.70154351 | -1.89320892 |
| C | -2.29198032 | -3.57506016 | -2.17666284 |
| C | -3.96992884 | -1.19332882 | 1.83683924  |
| C | -3.91369785 | -1.02924989 | 0.29908165  |
| C | -5.26587605 | -0.49493977 | -0.24885659 |
| C | 1.78391739  | 3.52219748  | -1.86543312 |
| C | 0.48874104  | 3.18937045  | -2.65119337 |
| C | 0.67966459  | 3.45172605  | -4.16780376 |
| C | -1.82043747 | 3.31549096  | -1.48715394 |
| C | -0.70784910 | 3.96309097  | -2.09044822 |
| C | -0.72020152 | 5.37209652  | -2.15528033 |
| C | -1.79378809 | 6.11018776  | -1.63219575 |
| C | -2.87516651 | 5.45162826  | -1.02640620 |
| C | -2.90653980 | 4.04436602  | -0.93377661 |
| C | -0.16091207 | -4.69743150 | -2.98687696 |
| C | -1.28112666 | -3.68114282 | -3.32751354 |
| C | -1.98223526 | -4.05587137 | -4.66021833 |
| C | -4.31384945 | 3.83991917  | 1.18340141  |
| C | -4.09485928 | 3.34678097  | -0.26998249 |
| C | -5.38577596 | 3.52405910  | -1.11304197 |
| H | 2.01563364  | -2.24792846 | 2.99525567  |
| H | 3.86316056  | -1.84838445 | 1.58672377  |
| H | -2.44686217 | -0.75106614 | -3.53067778 |
| H | -2.59563711 | 1.61175338  | -3.30493646 |

|   |             |             |             |
|---|-------------|-------------|-------------|
| H | -0.34880823 | 2.56307644  | 5.07479456  |
| H | -1.32767922 | 1.01037693  | 6.74457910  |
| H | -1.32916190 | -1.43285027 | 6.31185456  |
| H | 1.10141078  | 1.51897947  | 1.77480900  |
| H | 4.01608160  | 1.32589148  | 1.38177798  |
| H | -0.38081285 | 3.79700337  | 3.22276640  |
| H | -0.99808723 | 2.87283475  | 1.82855806  |
| H | 0.43245572  | 3.89847565  | 1.65135374  |
| H | 1.94662488  | 3.08456389  | 4.27439111  |
| H | 2.67160642  | 3.20448599  | 2.65791931  |
| H | 2.81386799  | 1.69469962  | 3.59232835  |
| H | 6.17681747  | 3.19862469  | 0.24309331  |
| H | 4.96375568  | 3.60882501  | 1.46740711  |
| H | 4.45550532  | 3.22108069  | -0.19231648 |
| H | 5.89821496  | 0.07957794  | 2.47538505  |
| H | 5.84044077  | 1.76998921  | 3.02082937  |
| H | 7.06005415  | 1.25736877  | 1.83613017  |
| H | 7.17724362  | 1.34146387  | -0.68896020 |
| H | 7.51818850  | -0.13111144 | -2.65745394 |
| H | 5.77009623  | -1.76644563 | -3.31553081 |
| H | -0.08285446 | -3.06445850 | 3.18372520  |
| H | 2.51488672  | -2.21776578 | -1.44806042 |
| H | -2.18994785 | -3.28337801 | 5.40125413  |
| H | -1.72831386 | -4.54569765 | 4.24546090  |
| H | -2.50845974 | -3.06163325 | 3.66689914  |
| H | 0.30522072  | -3.28585156 | 6.23773011  |
| H | 1.62283472  | -3.01496270 | 5.08788270  |
| H | 0.69217432  | -4.52992528 | 5.03212260  |
| H | 2.39539388  | -0.94774482 | -3.57858009 |
| H | 2.03618406  | -2.66462733 | -3.82289727 |
| H | 3.62043225  | -2.01599965 | -4.30689088 |
| H | 4.75623498  | -3.87200476 | -2.76115980 |
| H | 3.13053704  | -4.44410594 | -2.33638229 |
| H | 4.27125324  | -3.97486224 | -1.05703643 |
| H | -5.11533923 | -3.44079875 | 0.54080476  |
| H | -4.68993895 | -5.54892681 | -0.70295438 |
| H | -2.94467799 | -5.61402090 | -2.46485032 |
| H | -3.15748878 | -0.26943240 | 0.08380217  |
| H | 0.30480879  | 2.11759916  | -2.52645142 |
| H | -4.72900832 | -1.92563125 | 2.14214166  |
| H | -4.22593991 | -0.23451340 | 2.30797879  |
| H | -2.99796114 | -1.51535325 | 2.22180129  |
| H | -5.21581697 | -0.32317039 | -1.33139013 |
| H | -5.52583399 | 0.45368418  | 0.23964604  |
| H | -6.07899583 | -1.20698931 | -0.05545329 |
| H | 2.05039612  | 4.58302377  | -1.96632581 |
| H | 2.61928419  | 2.91980429  | -2.24367076 |
| H | 1.66120979  | 3.29549231  | -0.80020768 |
| H | -0.22267105 | 3.19136813  | -4.73615495 |
| H | 1.51186717  | 2.84830008  | -4.55293783 |
| H | 0.90990284  | 4.50655533  | -4.36764110 |
| H | 0.11505382  | 5.89445458  | -2.61514658 |



|   |             |             |             |
|---|-------------|-------------|-------------|
| H | -1.78557792 | 7.19616261  | -1.69335746 |
| H | -3.69787158 | 6.03431501  | -0.61947804 |
| H | -0.79628471 | -2.71319729 | -3.46193848 |
| H | -3.86911782 | 2.27681655  | -0.22509127 |
| H | -0.56832361 | -5.70318113 | -2.81639952 |
| H | 0.37204420  | -4.38382044 | -2.08230536 |
| H | 0.56110239  | -4.76283141 | -3.81260101 |
| H | -1.25094289 | -4.05944383 | -5.48001655 |
| H | -2.77358165 | -3.33728729 | -4.91237442 |
| H | -2.43904097 | -5.05318767 | -4.61847914 |
| H | -3.41129736 | 3.69498453  | 1.78938087  |
| H | -5.13430550 | 3.28105754  | 1.65308120  |
| H | -4.57671296 | 4.90554765  | 1.21538639  |
| H | -5.25283979 | 3.13688913  | -2.13142942 |
| H | -5.66839513 | 4.58248875  | -1.19015711 |
| H | -6.22262025 | 2.98408056  | -0.65057484 |

**Bare Complex (conformation 2 lower energy with distorted N-O bonds)**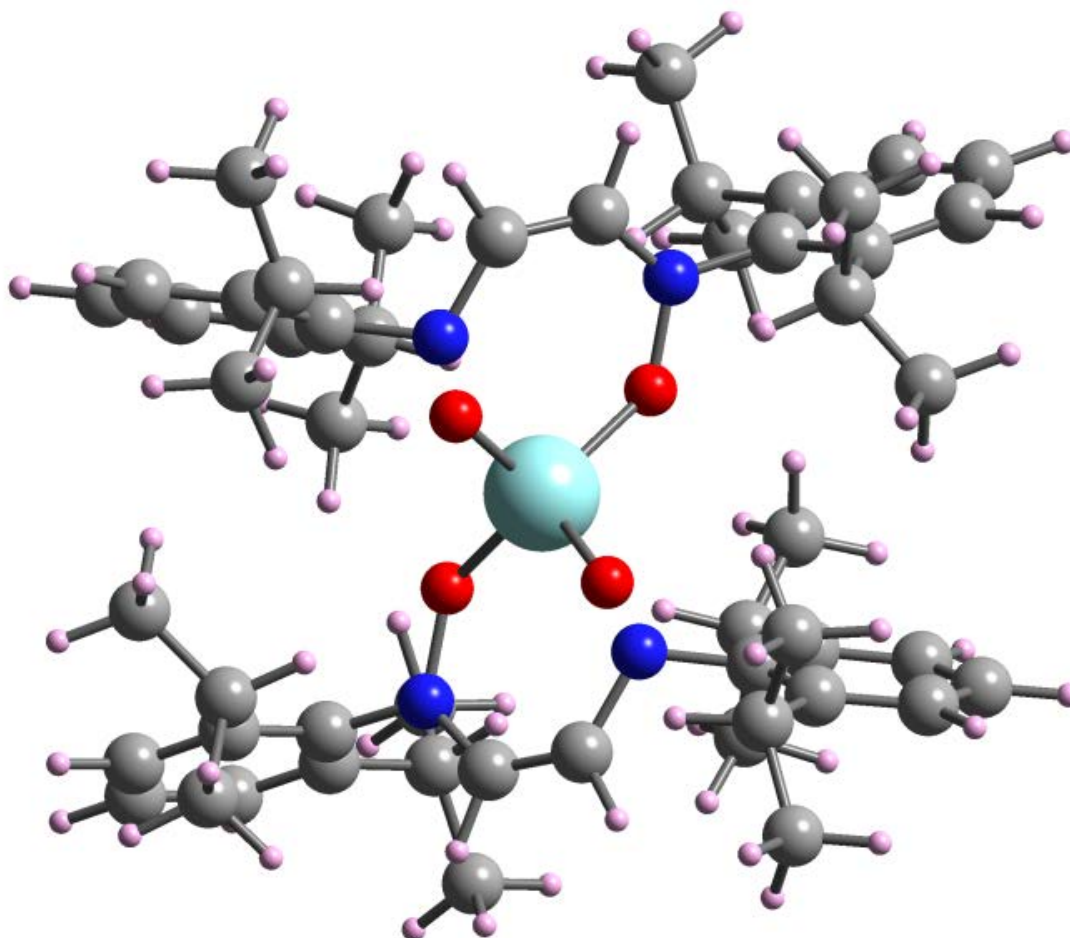

Fig. S107: ONCCNO Bare Complex (conformation 2 lower energy with distorted N-O bonds)

| SCF          | E <sub>ZP</sub> | H            | G            |
|--------------|-----------------|--------------|--------------|
| -2591.059596 | -2589.910390    | -2589.842214 | -2590.015860 |

|    |             |             |             |
|----|-------------|-------------|-------------|
| Zr | -0.00037700 | -0.00444800 | 0.62726100  |
| O  | -0.47854500 | 1.29891800  | 2.12658900  |
| O  | -1.64584600 | -0.65402700 | -0.39219900 |
| N  | 0.39276800  | -2.28086600 | 0.89831700  |
| N  | -2.42528900 | -1.84811300 | -0.33815400 |
| N  | 2.42803500  | 1.84862800  | -0.30943800 |
| N  | -0.39321000 | 2.26949700  | 0.92236900  |
| C  | -0.74371800 | -3.16292800 | 0.94595500  |
| C  | -1.96090900 | -2.92843100 | 0.36153000  |
| C  | 1.96254000  | 2.92115400  | 0.40106700  |
| C  | 0.74374900  | 3.14995000  | 0.98451300  |
| C  | 1.67180400  | -2.98915400 | 0.72659800  |
| C  | 2.21109300  | -3.08112600 | -0.58603300 |
| C  | 3.44027300  | -3.75348900 | -0.75331900 |
| C  | 4.10985300  | -4.32477200 | 0.33770600  |

|   |             |             |             |
|---|-------------|-------------|-------------|
| C | 3.53603200  | -4.26182000 | 1.61554700  |
| C | 2.30167100  | -3.61575600 | 1.83995900  |
| C | 2.36789500  | -1.72867800 | -2.76383500 |
| C | 1.47178700  | -2.57629100 | -1.83047200 |
| C | 0.85723300  | -3.77904900 | -2.59904800 |
| C | -2.89974700 | -1.90091000 | -4.48337100 |
| C | -2.91678100 | -2.61746300 | -3.11007000 |
| C | -3.04041000 | -4.15426700 | -3.29717400 |
| C | -3.77145600 | -1.72716800 | -0.84578200 |
| C | -4.02639300 | -2.09663900 | -2.19388900 |
| C | -5.35413000 | -2.01289800 | -2.66267100 |
| C | -6.38710400 | -1.56414700 | -1.82437000 |
| C | -6.11118400 | -1.18946200 | -0.50013800 |
| C | -4.79961500 | -1.25735400 | 0.01489100  |
| C | 2.56404900  | -2.78450800 | 4.23043400  |
| C | 1.71471400  | -3.64447600 | 3.25972000  |
| C | 1.57356600  | -5.09756500 | 3.78526400  |
| C | -5.06291300 | 0.55021100  | 1.79627900  |
| C | -4.52664300 | -0.86562500 | 1.46912100  |
| C | -5.12269300 | -1.91691200 | 2.44432300  |
| C | 3.77163900  | 1.73682400  | -0.82535900 |
| C | 4.02258700  | 2.13868200  | -2.16481200 |
| C | 5.34827400  | 2.06197400  | -2.64088300 |
| C | 6.38276900  | 1.58875200  | -1.81831600 |
| C | 6.11080800  | 1.18297000  | -0.50230300 |
| C | 4.80177100  | 1.24327500  | 0.01975300  |
| C | 2.87393600  | 1.98013600  | -4.44500400 |
| C | 2.91193700  | 2.68389000  | -3.06531500 |
| C | 3.05333000  | 4.22054400  | -3.23899700 |
| C | -2.57363300 | 2.74217800  | 4.25461900  |
| C | -1.72151500 | 3.60953000  | 3.29308600  |
| C | -1.57994900 | 5.05804600  | 3.83115600  |
| C | -1.67136800 | 2.98004100  | 0.75366800  |
| C | -2.30519900 | 3.59408000  | 1.87175900  |
| C | -3.53984400 | 4.24075400  | 1.65074500  |
| C | -4.11018000 | 4.31638200  | 0.37200200  |
| C | -3.43632200 | 3.75824900  | -0.72317700 |
| C | -2.20655800 | 3.08603200  | -0.55954900 |
| C | 5.08223400  | -0.59458800 | 1.76880700  |
| C | 4.53292700  | 0.82145400  | 1.46645200  |
| C | 5.11942600  | 1.86117600  | 2.46000000  |
| C | -2.35420800 | 1.75454800  | -2.75086100 |
| C | -1.46285700 | 2.59581700  | -1.80724700 |
| C | -0.85033100 | 3.80784600  | -2.56276700 |
| H | -0.60938500 | -4.09928800 | 1.47819000  |
| H | -2.70351500 | -3.71709600 | 0.44875400  |
| H | 2.70579200  | 3.70783900  | 0.50017400  |
| H | 0.60908700  | 4.07941100  | 1.52861700  |
| H | 3.87345400  | -3.83140600 | -1.74672800 |
| H | 5.06254800  | -4.82829200 | 0.19110100  |
| H | 4.04818100  | -4.72954600 | 2.45257200  |
| H | 0.63709300  | -1.94278100 | -1.51260700 |

|   |             |             |             |
|---|-------------|-------------|-------------|
| H | -1.95841500 | -2.41688200 | -2.61973300 |
| H | 3.19644700  | -2.31675400 | -3.17919100 |
| H | 2.78161600  | -0.87014200 | -2.22663500 |
| H | 1.77367400  | -1.35437100 | -3.60883500 |
| H | 1.64328800  | -4.46131100 | -2.94855300 |
| H | 0.29974100  | -3.42567800 | -3.47692000 |
| H | 0.17154400  | -4.34886700 | -1.96014000 |
| H | -3.80851700 | -2.10892900 | -5.06336900 |
| H | -2.04399800 | -2.24765200 | -5.07817900 |
| H | -2.81568900 | -0.81462100 | -4.36237400 |
| H | -2.99200100 | -4.67827400 | -2.33420500 |
| H | -2.22597800 | -4.53109700 | -3.92978700 |
| H | -3.99308400 | -4.41726300 | -3.77614300 |
| H | -5.58129600 | -2.29710500 | -3.68685400 |
| H | -7.40527900 | -1.50618600 | -2.20277900 |
| H | -6.91957800 | -0.84071000 | 0.13719900  |
| H | 0.72142000  | -3.19429500 | 3.24288100  |
| H | -3.44277600 | -0.84657100 | 1.62456500  |
| H | 3.60116500  | -3.14348900 | 4.28524200  |
| H | 2.13847400  | -2.82105400 | 5.24238500  |
| H | 2.56925300  | -1.74043500 | 3.89966700  |
| H | 2.54796500  | -5.58784000 | 3.90823500  |
| H | 0.97287100  | -5.71594200 | 3.10463400  |
| H | 1.07977100  | -5.09202400 | 4.76631200  |
| H | -4.64386400 | 1.30145900  | 1.11777200  |
| H | -4.78599700 | 0.82851600  | 2.82076700  |
| H | -6.15789100 | 0.59465600  | 1.72315600  |
| H | -6.21511500 | -1.97330300 | 2.34538600  |
| H | -4.88934700 | -1.64667500 | 3.48245200  |
| H | -4.71507200 | -2.91810400 | 2.25429200  |
| H | 5.57228900  | 2.37075100  | -3.65869800 |
| H | 7.39920700  | 1.53632700  | -2.20216600 |
| H | 6.92064600  | 0.81606200  | 0.12281200  |
| H | 1.95514900  | 2.49068000  | -2.56914900 |
| H | -0.72862500 | 3.15849700  | 3.27457500  |
| H | 3.78382000  | 2.17569100  | -5.02756600 |
| H | 2.02183000  | 2.34833800  | -5.03208100 |
| H | 2.76979900  | 0.89469400  | -4.33251800 |
| H | 3.02193100  | 4.73591200  | -2.27060800 |
| H | 2.23704000  | 4.61362800  | -3.85922100 |
| H | 4.00391900  | 4.47670600  | -3.72571600 |
| H | -3.61050400 | 3.10166300  | 4.31069900  |
| H | -2.14990300 | 2.76935200  | 5.26763500  |
| H | -2.57936000 | 1.70111400  | 3.91456700  |
| H | -0.97688300 | 5.68132000  | 3.15711000  |
| H | -1.08861900 | 5.04387300  | 4.81335700  |
| H | -2.55412600 | 5.54839400  | 3.95561400  |
| H | -4.05501800 | 4.69883600  | 2.49123600  |
| H | -5.06336300 | 4.81974600  | 0.22807300  |
| H | -3.86673300 | 3.84612800  | -1.71696800 |
| H | 3.44932800  | 0.78977200  | 1.62151800  |
| H | -0.62679000 | 1.96192400  | -1.49363900 |

|   |             |             |             |
|---|-------------|-------------|-------------|
| H | 6.17793500  | -0.62681300 | 1.70027300  |
| H | 4.67373200  | -1.33693700 | 1.07427200  |
| H | 4.80360100  | -0.89522400 | 2.78650000  |
| H | 4.89201900  | 1.56883700  | 3.49344300  |
| H | 4.69950800  | 2.86087700  | 2.28993100  |
| H | 6.21084300  | 1.93198200  | 2.35902700  |
| H | -2.76723200 | 0.89033600  | -2.22240900 |
| H | -1.75660500 | 1.38921600  | -3.59744400 |
| H | -3.18304700 | 2.34445200  | -3.16306400 |
| H | -0.16811500 | 4.37391400  | -1.91678300 |
| H | -1.63756600 | 4.49096600  | -2.90792500 |
| H | -0.28957500 | 3.46468800  | -3.44260600 |
| O | 0.47268800  | -1.32401400 | 2.11396200  |
| O | 1.64775200  | 0.65614700  | -0.38168100 |

## 9.2 Structures with five oxygen atoms

## Oxo Complex

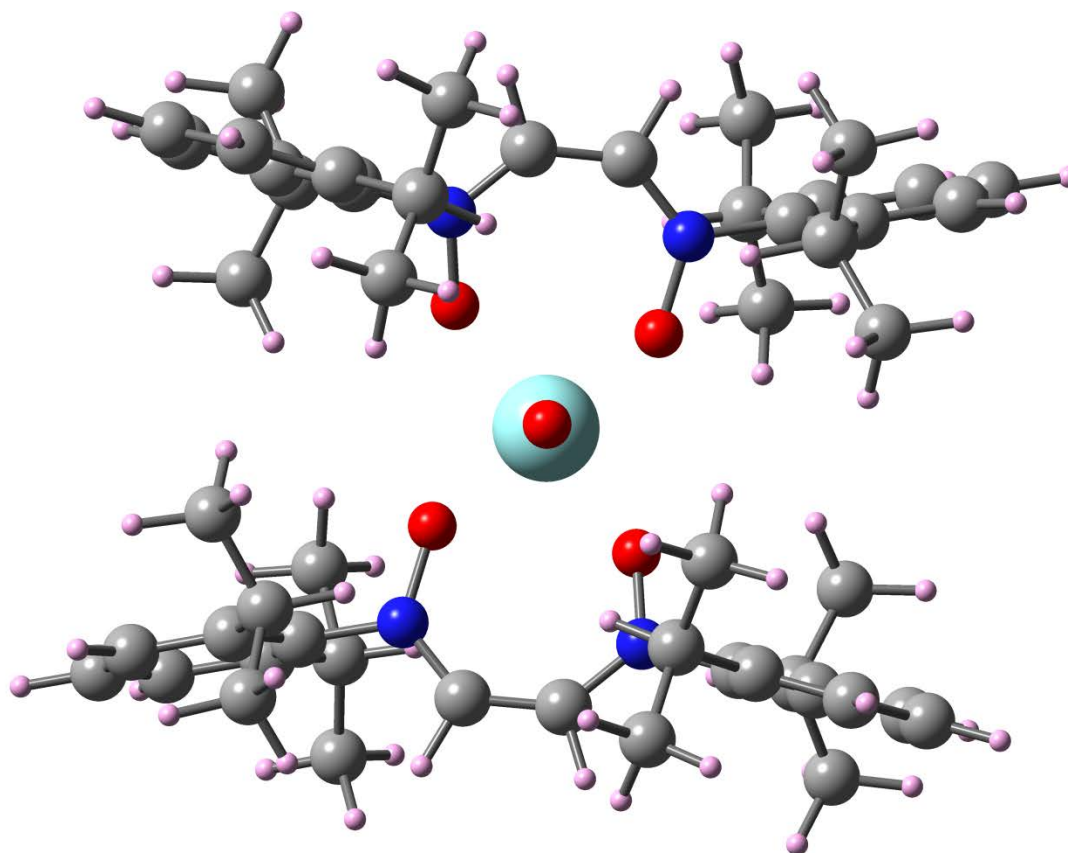

Fig. S108: ONCCNO Oxo Complex

| SCF            | E <sub>ZP</sub> | H            | G            |
|----------------|-----------------|--------------|--------------|
| -2666.25984069 | -2665.108325    | -2665.037239 | -2665.223969 |

|   |             |             |             |
|---|-------------|-------------|-------------|
| N | -0.99166172 | -3.03663397 | -0.13623739 |
| N | 0.99234534  | 3.03610469  | -0.13860398 |
| C | 0.15098281  | -3.77988822 | -0.19706550 |
| C | 1.49370331  | -3.51290920 | 0.09781246  |
| C | -0.15079133 | 3.77861123  | -0.19931323 |
| C | -1.49342202 | 3.51129322  | 0.09581789  |
| C | -2.25715904 | -3.54069412 | -0.63315672 |
| C | -3.25974780 | -3.88133007 | 0.31451636  |
| C | -4.48952841 | -4.35899753 | -0.18024126 |
| C | -4.70766382 | -4.50043884 | -1.56095222 |
| C | -3.70338382 | -4.14713230 | -2.47441433 |
| C | -2.45946375 | -3.64352614 | -2.03520496 |
| C | -3.83879866 | -2.50027115 | 2.35259625  |
| C | -3.04241988 | -3.72231827 | 1.82162543  |
| C | -3.40472803 | -5.00876666 | 2.60586042  |

|   |             |             |             |
|---|-------------|-------------|-------------|
| C | 3.18749410  | -1.44740371 | 4.15070512  |
| C | 3.04330313  | -2.70113096 | 3.24704663  |
| C | 3.19133000  | -4.00404656 | 4.07345531  |
| C | 3.61882073  | -2.47390464 | 0.74259811  |
| C | 4.03874382  | -2.64346833 | 2.08601198  |
| C | 5.42540821  | -2.72608623 | 2.33010692  |
| C | 6.34954675  | -2.63493603 | 1.27646027  |
| C | 5.90504447  | -2.44156899 | -0.04112869 |
| C | 4.52857872  | -2.34407031 | -0.33631177 |
| C | -1.95966734 | -2.12717746 | -4.02189647 |
| C | -1.40884335 | -3.21802498 | -3.06813066 |
| C | -0.88669366 | -4.44155020 | -3.86714703 |
| C | 4.64247346  | -0.76290956 | -2.32362997 |
| C | 4.06446152  | -2.09266639 | -1.77377355 |
| C | 4.43212352  | -3.28015191 | -2.70197845 |
| C | 2.25756035  | 3.54167537  | -0.63492830 |
| C | 2.46094824  | 3.64289989  | -2.03689847 |
| C | 3.70417906  | 4.14856087  | -2.47568372 |
| C | 4.70684992  | 4.50520863  | -1.56172355 |
| C | 4.48783594  | 4.36495307  | -0.18103174 |
| C | 3.25860408  | 3.88531375  | 0.31323323  |
| C | 1.96677089  | 2.12414949  | -4.02309980 |
| C | 1.41200128  | 3.21339768  | -3.06982054 |
| C | 0.88582586  | 4.43471694  | -3.86955201 |
| C | -3.19217355 | 1.45241025  | 4.15028437  |
| C | -3.04740900 | 2.70489424  | 3.24497298  |
| C | -3.19770929 | 4.00892303  | 4.06918648  |
| C | -3.61871932 | 2.47257405  | 0.74004691  |
| C | -4.04092629 | 2.64465886  | 2.08242119  |
| C | -5.42801796 | 2.72739920  | 2.32403694  |
| C | -6.35034697 | 2.63401410  | 1.26900450  |
| C | -5.90359230 | 2.43814764  | -0.04745626 |
| C | -4.52662161 | 2.34029867  | -0.34015987 |
| C | 3.83805521  | 2.50622317  | 2.35241626  |
| C | 3.04038498  | 3.72693987  | 1.82027091  |
| C | 3.40039488  | 5.01423966  | 2.60413778  |
| C | -4.63978062 | 0.75752431  | -2.32652325 |
| C | -4.06001035 | 2.08636812  | -1.77639542 |
| C | -4.42314158 | 3.27390304  | -2.70636898 |
| H | -0.03417797 | -4.78801094 | -0.55220361 |
| H | 2.14523448  | -4.37462486 | -0.00417441 |
| H | 0.03377592  | 4.78663435  | -0.55502233 |
| H | -2.14529882 | 4.37254132  | -0.00785980 |
| H | -5.27822343 | -4.62800389 | 0.51742109  |
| H | -5.66152472 | -4.87733081 | -1.92317654 |
| H | -3.89085087 | -4.24403099 | -3.54065095 |
| H | -1.98235568 | -3.51129693 | 1.99655701  |
| H | 2.02941121  | -2.68138052 | 2.83346413  |
| H | -4.91912302 | -2.63727279 | 2.20608656  |
| H | -3.52876877 | -1.58838233 | 1.83118297  |
| H | -3.65625069 | -2.36511314 | 3.42750979  |
| H | -4.47449416 | -5.24478006 | 2.53276455  |

|   |             |             |             |
|---|-------------|-------------|-------------|
| H | -3.16876403 | -4.87705503 | 3.67026980  |
| H | -2.84210426 | -5.87593528 | 2.23600116  |
| H | 4.18101222  | -1.40263626 | 4.61713087  |
| H | 2.43756763  | -1.46980523 | 4.95272552  |
| H | 3.04026213  | -0.53110876 | 3.56761637  |
| H | 3.06379430  | -4.89345295 | 3.44290284  |
| H | 2.43338962  | -4.03703917 | 4.86726843  |
| H | 4.17740599  | -4.06960338 | 4.55199493  |
| H | 5.78307425  | -2.85938625 | 3.34807548  |
| H | 7.41508107  | -2.70465244 | 1.48332816  |
| H | 6.63159917  | -2.35611283 | -0.84521606 |
| H | -0.56083573 | -2.76173554 | -2.54904687 |
| H | 2.97393655  | -1.99146826 | -1.77655208 |
| H | -2.83920887 | -2.47569716 | -4.58036614 |
| H | -1.18430287 | -1.84329008 | -4.74444073 |
| H | -2.22545469 | -1.22702239 | -3.45844201 |
| H | -1.69222557 | -4.91496221 | -4.44458917 |
| H | -0.45820166 | -5.20542068 | -3.20434237 |
| H | -0.10689537 | -4.12688051 | -4.57302890 |
| H | 4.36050897  | 0.08215350  | -1.68505814 |
| H | 4.25215030  | -0.57264026 | -3.33171081 |
| H | 5.73854028  | -0.79446520 | -2.38660408 |
| H | 5.51992467  | -3.41906694 | -2.76142476 |
| H | 4.06019343  | -3.09579709 | -3.71822580 |
| H | 3.99304923  | -4.22050347 | -2.34371090 |
| H | 3.89246925  | 4.24437165  | -3.54187488 |
| H | 5.66022871  | 4.88369544  | -1.92355718 |
| H | 5.27540961  | 4.63633770  | 0.51697378  |
| H | 0.56549938  | 2.75437553  | -2.55066683 |
| H | -2.03283384 | 2.68522478  | 2.83305624  |
| H | 2.84307213  | 2.47668791  | -4.58413262 |
| H | 1.19135719  | 1.83471387  | -4.74333924 |
| H | 2.23933990  | 1.22641061  | -3.45897577 |
| H | 0.45400359  | 5.19713725  | -3.20725217 |
| H | 0.10765517  | 4.11698657  | -4.57586193 |
| H | 1.69002017  | 4.91098300  | -4.44652460 |
| H | -4.18651081 | 1.40754991  | 4.61495816  |
| H | -2.44372053 | 1.47665630  | 4.95362817  |
| H | -3.04312737 | 0.53537307  | 3.56884347  |
| H | -3.06986222 | 4.89748870  | 3.43750944  |
| H | -2.44104345 | 4.04368095  | 4.86414328  |
| H | -4.18456461 | 4.07447444  | 4.54611828  |
| H | -5.78741863 | 2.86261640  | 3.34114228  |
| H | -7.41624557 | 2.70391056  | 1.47393417  |
| H | -6.62880485 | 2.35089100  | -0.85255369 |
| H | 1.98046956  | 3.51458155  | 1.99456092  |
| H | -2.96972035 | 1.98270287  | -1.77682235 |
| H | 4.91830012  | 2.64472093  | 2.20673257  |
| H | 3.52978017  | 1.59366722  | 1.83111830  |
| H | 3.65480441  | 2.37124760  | 3.42723186  |
| H | 3.16387426  | 4.88272140  | 3.66844517  |
| H | 2.83686184  | 5.88047138  | 2.23347341  |



|    |             |             |             |
|----|-------------|-------------|-------------|
| H  | 4.46989631  | 5.25165274  | 2.53167275  |
| H  | -4.36137786 | -0.08771814 | -1.68663387 |
| H  | -4.24731496 | 0.56552760  | -3.33343000 |
| H  | -5.73560763 | 0.79152441  | -2.39235238 |
| H  | -3.98279141 | 4.21360946  | -2.34798648 |
| H  | -5.51052950 | 3.41506745  | -2.76813397 |
| H  | -4.04947176 | 3.08788970  | -3.72167329 |
| O  | -0.00398606 | 0.00050727  | -1.91842051 |
| O  | -1.65913196 | 1.13847371  | 0.60978355  |
| O  | 1.66072222  | -1.13871824 | 0.60456520  |
| N  | -2.19202352 | 2.39882172  | 0.46815869  |
| N  | 2.19261009  | -2.39995508 | 0.46825444  |
| O  | -1.04985522 | -1.79218128 | 0.46345512  |
| O  | 1.05160612  | 1.79126147  | 0.45987358  |
| Zr | -0.00026679 | -0.00023197 | -0.09542775 |

### 9.3 Structures with six oxygen atoms

#### Peroxo Complex

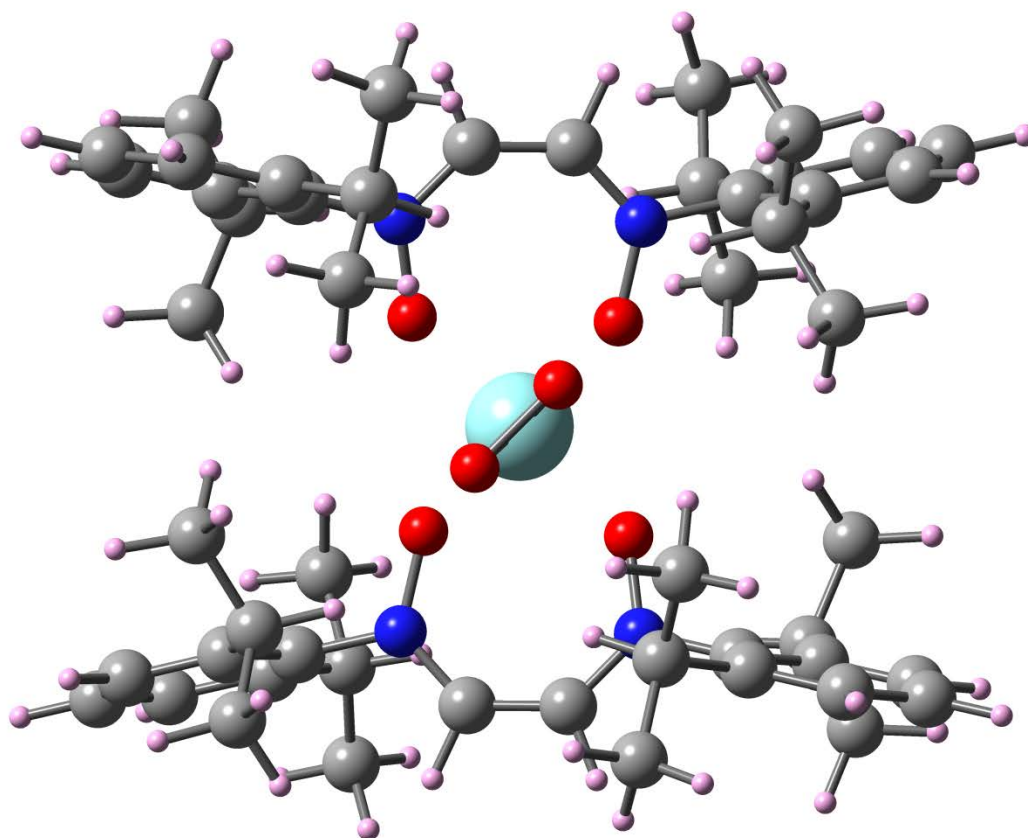

Fig. S109: ONCCNO Peroxo Complex

| SCF          | E <sub>ZP</sub> | H            | G            |
|--------------|-----------------|--------------|--------------|
| -2741.418446 | -2740.263703    | -2740.191687 | -2740.379485 |

|   |             |             |             |
|---|-------------|-------------|-------------|
| O | -1.38450735 | -1.51858911 | 0.28827603  |
| O | 1.38421986  | 1.51863166  | 0.28710657  |
| O | 0.58035595  | -0.53257289 | -2.15141397 |
| O | -0.57909106 | 0.52793787  | -2.15288970 |
| N | -1.71971242 | 2.66211377  | 0.60018216  |
| N | 1.49094670  | 2.83115031  | -0.13028591 |
| N | 1.71956795  | -2.66185947 | 0.60049934  |
| N | -1.49102968 | -2.83081844 | -0.13000284 |
| C | -0.86540722 | 3.68507315  | 0.30963739  |
| C | 0.49131563  | 3.75246467  | -0.02838126 |
| C | 0.86530429  | -3.68478172 | 0.30987263  |
| C | -0.49144310 | -3.75214241 | -0.02824185 |
| C | -3.12432805 | 2.91374794  | 0.88219034  |
| C | -4.04671155 | 2.87314635  | -0.19360114 |
| C | -5.40137018 | 3.13167306  | 0.10504649  |

|   |             |             |             |
|---|-------------|-------------|-------------|
| C | -5.81380309 | 3.39855081  | 1.42032376  |
| C | -4.88067705 | 3.40130555  | 2.46984716  |
| C | -3.51412612 | 3.15253931  | 2.22407673  |
| C | -4.33076667 | 1.27145068  | -2.14545417 |
| C | -3.62080606 | 2.54947737  | -1.62831159 |
| C | -3.87677979 | 3.74867201  | -2.57829235 |
| C | 2.14740002  | 2.04987257  | -4.07233502 |
| C | 1.82121586  | 3.17176843  | -3.05242838 |
| C | 1.48683575  | 4.50279438  | -3.77704079 |
| C | 2.79994056  | 3.18783571  | -0.64799999 |
| C | 2.96192898  | 3.36404758  | -2.04705034 |
| C | 4.24995081  | 3.71428874  | -2.50785737 |
| C | 5.32590278  | 3.85437010  | -1.61854538 |
| C | 5.13972969  | 3.64561343  | -0.24152909 |
| C | 3.87258839  | 3.30871453  | 0.27476106  |
| C | -2.78710786 | 1.85546660  | 4.27256698  |
| C | -2.51652484 | 3.09964996  | 3.38430686  |
| C | -2.53072124 | 4.40004015  | 4.22707532  |
| C | 4.31658255  | 1.69989846  | 2.17781819  |
| C | 3.68631221  | 3.05993997  | 1.77395885  |
| C | 4.25382535  | 4.21561411  | 2.63625182  |
| C | 3.12417190  | -2.91370120 | 0.88246202  |
| C | 3.51385956  | -3.15340661 | 2.22421682  |
| C | 4.88034063  | -3.40269857 | 2.46983989  |
| C | 5.81347855  | -3.39958609 | 1.42031987  |
| C | 5.40115200  | -3.13172349 | 0.10521150  |
| C | 4.04656945  | -2.87259871 | -0.19328957 |
| C | 2.78642568  | -1.85621792 | 4.27238086  |
| C | 2.51623951  | -3.10075299 | 3.38444107  |
| C | 2.53080589  | -4.40087612 | 4.22756080  |
| C | -2.14635457 | -2.05127587 | -4.07319484 |
| C | -1.82022737 | -3.17226356 | -3.05225978 |
| C | -1.48514112 | -4.50374588 | -3.77569715 |
| C | -2.79989680 | -3.18744000 | -0.64815635 |
| C | -2.96131853 | -3.36409442 | -2.04721719 |
| C | -4.24916577 | -3.71452405 | -2.50839462 |
| C | -5.32547960 | -3.85425960 | -1.61947476 |
| C | -5.13985256 | -3.64500952 | -0.24245633 |
| C | -3.87291588 | -3.30798169 | 0.27424220  |
| C | 4.33150423  | -1.26969713 | -2.14390413 |
| C | 3.62076649  | -2.54769850 | -1.62774884 |
| C | 3.87602571  | -3.74627917 | -2.57867353 |
| C | -4.31684302 | -1.69822493 | 2.17648202  |
| C | -3.68722708 | -3.05883701 | 1.77345491  |
| C | -4.25588506 | -4.21378429 | 2.63594677  |
| H | -1.36985627 | 4.64519117  | 0.31844037  |
| H | 0.83472463  | 4.74921267  | -0.28400956 |
| H | 1.36981279  | -4.64487168 | 0.31827663  |
| H | -0.83476031 | -4.74883053 | -0.28422986 |
| H | -6.13668530 | 3.11557120  | -0.69529050 |
| H | -6.86312872 | 3.59439390  | 1.62918659  |
| H | -5.21687835 | 3.59074939  | 3.48612315  |

|   |             |             |             |
|---|-------------|-------------|-------------|
| H | -2.54700370 | 2.33794477  | -1.64178754 |
| H | 0.92300042  | 2.84376178  | -2.52058965 |
| H | -5.41945947 | 1.40785231  | -2.20135252 |
| H | -4.12280419 | 0.41699903  | -1.49147386 |
| H | -3.96520389 | 1.02363256  | -3.14955502 |
| H | -4.94659174 | 3.98902909  | -2.64261178 |
| H | -3.52404943 | 3.50782921  | -3.58935393 |
| H | -3.34916153 | 4.64980359  | -2.23878144 |
| H | 3.05312265  | 2.27550365  | -4.65220565 |
| H | 1.31082906  | 1.93526235  | -4.77300691 |
| H | 2.27470346  | 1.08949030  | -3.56203544 |
| H | 1.22508659  | 5.29707956  | -3.06473070 |
| H | 0.63546592  | 4.35816337  | -4.45455703 |
| H | 2.33642704  | 4.85782551  | -4.37582469 |
| H | 4.41189015  | 3.86209005  | -3.57239261 |
| H | 6.31063317  | 4.11832697  | -1.99765816 |
| H | 5.98359824  | 3.74995207  | 0.43533065  |
| H | -1.50921780 | 2.98298681  | 2.96984837  |
| H | 2.61305263  | 2.98637338  | 1.98007951  |
| H | -3.78437033 | 1.90310739  | 4.73031519  |
| H | -2.04542115 | 1.79590778  | 5.08041483  |
| H | -2.72532136 | 0.93553033  | 3.67968585  |
| H | -3.50149796 | 4.55453234  | 4.71589524  |
| H | -2.32301335 | 5.28136861  | 3.60652724  |
| H | -1.76689653 | 4.34887026  | 5.01411264  |
| H | 3.84974364  | 0.88051972  | 1.62095573  |
| H | 4.16894939  | 1.51712589  | 3.25106154  |
| H | 5.39670384  | 1.68850117  | 1.97733836  |
| H | 5.34413929  | 4.29991103  | 2.53954076  |
| H | 4.03074498  | 4.03583989  | 3.69634088  |
| H | 3.81463419  | 5.18118588  | 2.35339759  |
| H | 5.21646694  | -3.59290474 | 3.48599483  |
| H | 6.86273718  | -3.59590674 | 1.62907153  |
| H | 6.13647691  | -3.11531762 | -0.69511057 |
| H | 1.50887584  | -2.98449648 | 2.96998306  |
| H | -0.92233445 | -2.84345952 | -2.52036896 |
| H | 3.78372326  | -1.90342320 | 4.73010116  |
| H | 2.04473410  | -1.79671752 | 5.08022963  |
| H | 2.72429753  | -0.93647616 | 3.67924447  |
| H | 2.32347679  | -5.28246805 | 3.60725964  |
| H | 1.76686033  | -4.34971202 | 5.01448187  |
| H | 3.50154435  | -4.55490287 | 4.71659531  |
| H | -3.05175463 | -2.27760690 | -4.65329829 |
| H | -1.30950778 | -1.93696513 | -4.77358511 |
| H | -2.27412726 | -1.09056311 | -3.56364163 |
| H | -1.22348529 | -5.29743051 | -3.06267657 |
| H | -0.63349243 | -4.35936989 | -4.45291573 |
| H | -2.33435290 | -4.85948820 | -4.37460820 |
| H | -4.41065868 | -3.86275488 | -3.57293462 |
| H | -6.31005636 | -4.11836805 | -1.99888141 |
| H | -5.98399025 | -3.74912460 | 0.43409739  |
| H | 2.54709657  | -2.33549229 | -1.64108161 |

|    |             |             |             |
|----|-------------|-------------|-------------|
| H  | -2.61402161 | -2.98587233 | 1.98009228  |
| H  | 5.42009861  | -1.40679470 | -2.20007411 |
| H  | 4.12421632  | -0.41567802 | -1.48914293 |
| H  | 3.96594813  | -1.02078017 | -3.14773074 |
| H  | 3.52345027  | -3.50437524 | -3.58953500 |
| H  | 3.34784096  | -4.64737050 | -2.23992718 |
| H  | 4.94569504  | -3.98724758 | -2.64318628 |
| H  | -3.84913578 | -0.87936353 | 1.61960031  |
| H  | -4.16972870 | -1.51518408 | 3.24975434  |
| H  | -5.39683920 | -1.68624583 | 1.97536513  |
| H  | -3.81742788 | -5.17981203 | 2.35350768  |
| H  | -5.34624996 | -4.29720947 | 2.53905813  |
| H  | -4.03289421 | -4.03384481 | 3.69602808  |
| O  | -1.35825724 | 1.34142853  | 0.64403327  |
| O  | 1.35794803  | -1.34129767 | 0.64547503  |
| Zr | 0.00002677  | -0.00014728 | -0.27102941 |

## Dioxo Complex

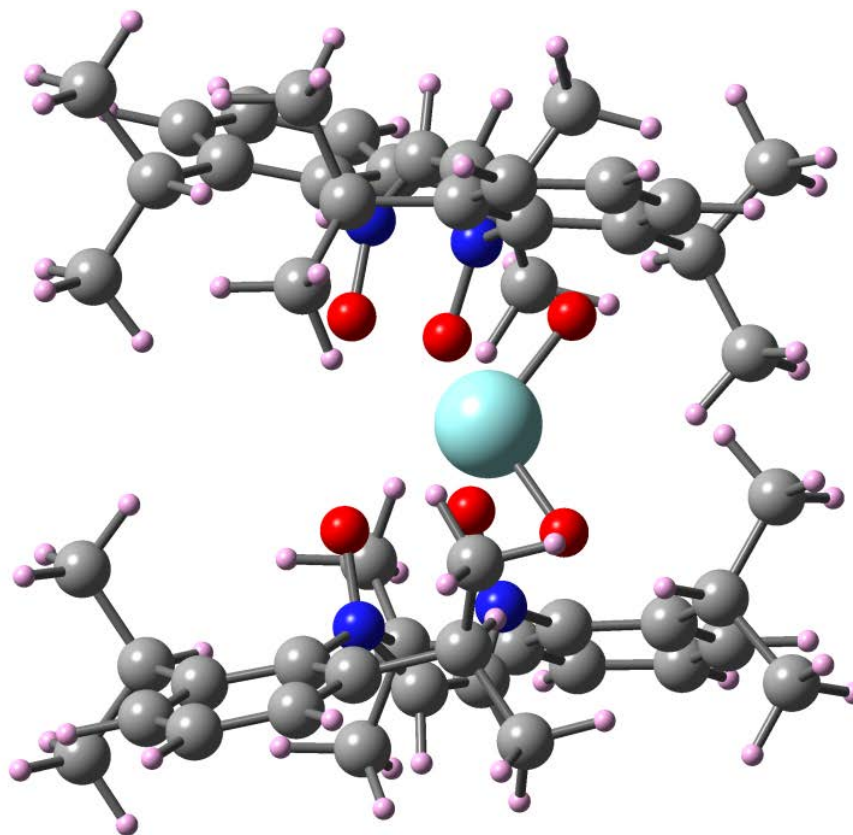

Fig. S110: ONCCNO Dioxo Complex

| SCF          | E <sub>ZP</sub> | H            | G            |
|--------------|-----------------|--------------|--------------|
| -2741.430518 | -2740.273171    | -2740.201764 | -2740.384290 |
| O            | -0.29931310     | -1.48817895  | 1.22264616   |
| O            | 2.24586953      | 0.00470378   | -0.26814580  |
| O            | -0.25059029     | -1.53919155  | -1.73370880  |
| N            | 0.73549769      | 2.73353394   | 1.00466443   |
| N            | 3.01701150      | 1.03490245   | -0.66951589  |
| N            | -3.01681699     | -1.03506223  | -0.66976165  |
| N            | -0.73564594     | -2.73314195  | 1.00541556   |
| C            | 1.77261699      | 3.07101416   | 0.24358583   |
| C            | 2.76636542      | 2.32450434   | -0.47868526  |
| C            | -2.76628220     | -2.32460598  | -0.47833928  |
| C            | -1.77250336     | -3.07089539  | 0.24412227   |
| C            | -0.05302834     | 3.79306891   | 1.65727504   |
| C            | -0.98693904     | 4.51553063   | 0.87701649   |
| C            | -1.72828251     | 5.51433682   | 1.54770128   |
| C            | -1.55601681     | 5.75135632   | 2.91961871   |
| C            | -0.63826628     | 4.99022070   | 3.66372517   |
| C            | 0.13643518      | 3.98693000   | 3.04754230   |
| C            | -2.69722202     | 3.79327487   | -0.85184655  |

|   |             |             |             |
|---|-------------|-------------|-------------|
| C | -1.23153386 | 4.24058276  | -0.61126447 |
| C | -0.88555023 | 5.48221899  | -1.47354987 |
| C | 2.33630050  | -0.28448703 | -4.36118509 |
| C | 2.88938128  | 0.96418472  | -3.62259965 |
| C | 3.16101568  | 2.12268836  | -4.61724428 |
| C | 4.22057321  | 0.63416577  | -1.41710322 |
| C | 4.15178083  | 0.60615182  | -2.83106641 |
| C | 5.32447062  | 0.20332316  | -3.50860963 |
| C | 6.48396390  | -0.16072052 | -2.80742146 |
| C | 6.50126779  | -0.14142275 | -1.40286642 |
| C | 5.36151075  | 0.25094533  | -0.67177432 |
| C | 0.29658406  | 2.10233118  | 4.72464762  |
| C | 1.09652252  | 3.12575080  | 3.87413861  |
| C | 2.03898612  | 3.97591402  | 4.76199051  |
| C | 5.58908528  | -1.20755271 | 1.39442782  |
| C | 5.38352262  | 0.23421808  | 0.85996735  |
| C | 6.46101216  | 1.19629954  | 1.42466307  |
| C | -4.22077021 | -0.63457893 | -1.41689626 |
| C | -4.15291083 | -0.60751561 | -2.83093705 |
| C | -5.32595290 | -0.20483014 | -3.50795386 |
| C | -6.48489018 | 0.15996854  | -2.80623653 |
| C | -6.50127716 | 0.14156507  | -1.40166405 |
| C | -5.36113318 | -0.25062828 | -0.67107741 |
| C | -2.33812081 | 0.28121600  | -4.36299874 |
| C | -2.89126099 | -0.96667809 | -3.62315417 |
| C | -3.16425162 | -2.12569491 | -4.61682914 |
| C | -0.29858736 | -2.10299283 | 4.72608934  |
| C | -1.09759479 | -3.12640950 | 3.87471308  |
| C | -2.04006517 | -3.97746850 | 4.76170448  |
| C | 0.05316860  | -3.79242219 | 1.65804229  |
| C | -0.13668644 | -3.98675623 | 3.04819883  |
| C | 0.63826283  | -4.98986484 | 3.66436394  |
| C | 1.55663237  | -5.75036506 | 2.92036866  |
| C | 1.72927958  | -5.51286962 | 1.54858335  |
| C | 0.98770562  | -4.51421975 | 0.87792291  |
| C | -5.58679346 | 1.20942227  | 1.39423121  |
| C | -5.38207987 | -0.23280571 | 0.86066468  |
| C | -6.45947951 | -1.19412128 | 1.42682279  |
| C | 2.69860478  | -3.79077379 | -0.84981692 |
| C | 1.23290643  | -4.23853008 | -0.61012275 |
| C | 0.88759271  | -5.47982335 | -1.47317399 |
| H | 1.91830202  | 4.14352696  | 0.17987581  |
| H | 3.50647710  | 2.96216940  | -0.95105184 |
| H | -3.50653912 | -2.96240201 | -0.95029954 |
| H | -1.91800548 | -4.14343687 | 0.18048085  |
| H | -2.45320682 | 6.09959262  | 0.98827498  |
| H | -2.14241468 | 6.52323208  | 3.41285233  |
| H | -0.52496199 | 5.17716912  | 4.72814961  |
| H | -0.60508630 | 3.40782897  | -0.95703208 |
| H | 2.08880730  | 1.29051437  | -2.94682989 |
| H | -3.42039837 | 4.56649384  | -0.55578790 |
| H | -2.91756185 | 2.87292407  | -0.29838883 |

|   |             |             |             |
|---|-------------|-------------|-------------|
| H | -2.84227257 | 3.57788242  | -1.91771043 |
| H | -1.52664088 | 6.34158353  | -1.23165903 |
| H | -1.02458874 | 5.24279488  | -2.53506417 |
| H | 0.15892183  | 5.79386793  | -1.33365864 |
| H | 3.07636099  | -0.71495157 | -5.05141358 |
| H | 1.44898511  | 0.00077318  | -4.94020850 |
| H | 2.02159474  | -1.05343238 | -3.64673423 |
| H | 3.54513438  | 3.01541035  | -4.10415184 |
| H | 2.22512615  | 2.39952913  | -5.11828851 |
| H | 3.88812712  | 1.84081092  | -5.39157601 |
| H | 5.32072806  | 0.17062268  | -4.59465883 |
| H | 7.37269778  | -0.46737274 | -3.35425898 |
| H | 7.40241293  | -0.43780426 | -0.87218084 |
| H | 1.72487521  | 2.54396233  | 3.18992193  |
| H | 4.40898033  | 0.57060603  | 1.23112732  |
| H | -0.36572596 | 2.61500459  | 5.43529250  |
| H | 0.98283376  | 1.46389014  | 5.29694911  |
| H | -0.31247720 | 1.46143905  | 4.07803016  |
| H | 1.48529704  | 4.53007696  | 5.53063913  |
| H | 2.60583652  | 4.70291810  | 4.16591975  |
| H | 2.75526429  | 3.32397736  | 5.27906397  |
| H | 4.80463292  | -1.87582951 | 1.02167406  |
| H | 5.55261930  | -1.21407175 | 2.49184150  |
| H | 6.56132819  | -1.61403634 | 1.08625362  |
| H | 7.46984932  | 0.89395248  | 1.11523285  |
| H | 6.43360533  | 1.19538284  | 2.52233991  |
| H | 6.30009762  | 2.22594989  | 1.07900804  |
| H | -5.32294394 | -0.17289458 | -4.59402864 |
| H | -7.37391229 | 0.46648078  | -3.35268448 |
| H | -7.40199367 | 0.43852447  | -0.87057408 |
| H | -2.09034224 | -1.29302801 | -2.94780891 |
| H | -1.72589238 | -2.54460610 | 3.19046654  |
| H | -3.07855014 | 0.71168399  | -5.05283170 |
| H | -1.45149066 | -0.00491595 | -4.94263870 |
| H | -2.02231378 | 1.05040249  | -3.64929787 |
| H | -3.54842853 | -3.01788245 | -4.10285160 |
| H | -2.22888105 | -2.40334285 | -5.11839300 |
| H | -3.89181129 | -1.84395343 | -5.39079341 |
| H | 0.36364781  | -2.61564822 | 5.43681897  |
| H | -0.98543945 | -1.46516898 | 5.29835567  |
| H | 0.31044788  | -1.46148545 | 4.08005839  |
| H | -2.60632213 | -4.70441334 | 4.16499679  |
| H | -2.75686724 | -3.32612851 | 5.27880332  |
| H | -1.48646439 | -4.53179215 | 5.53030141  |
| H | 0.52465292  | -5.17718099 | 4.72869143  |
| H | 2.14322628  | -6.52209779 | 3.41359250  |
| H | 2.45471920  | -6.09758440 | 0.98925870  |
| H | -4.40738364 | -0.56925303 | 1.23137764  |
| H | 0.60645576  | -3.40571787 | -0.95574524 |
| H | -6.55910416 | 1.61600750  | 1.08640863  |
| H | -4.80236718 | 1.87716924  | 1.02047375  |
| H | -5.54959453 | 1.21671238  | 2.49161516  |



|    |             |             |             |
|----|-------------|-------------|-------------|
| H  | -6.43127934 | -1.19242992 | 2.52447889  |
| H  | -6.29916680 | -2.22407207 | 1.08178449  |
| H  | -7.46843923 | -0.89165348 | 1.11791119  |
| H  | 2.91851795  | -2.87069568 | -0.29573329 |
| H  | 2.84407780  | -3.57474414 | -1.91549447 |
| H  | 3.42181142  | -4.56400904 | -0.55387606 |
| H  | -0.15687640 | -5.79177207 | -1.33392578 |
| H  | 1.52875275  | -6.33916646 | -1.23139961 |
| H  | 1.02708360  | -5.23986119 | -2.53450822 |
| O  | 0.25129238  | 1.53808841  | -1.73437203 |
| O  | -2.24552914 | -0.00472018 | -0.26911838 |
| O  | 0.29878317  | 1.48874853  | 1.22190180  |
| Zr | 0.00026548  | -0.00030394 | -0.66200721 |

## Octahedral Complex

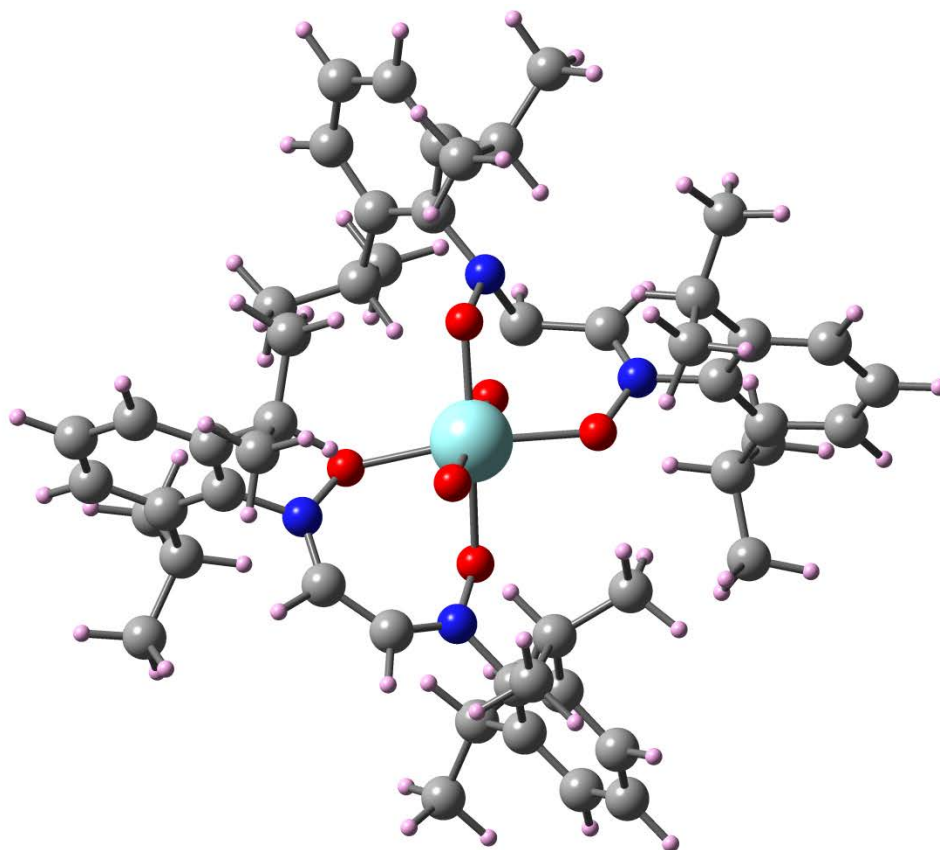

Fig. S111: ONCCNO Octahedral Complex

| SCF          | $E_{ZP}$     | H            | G            |
|--------------|--------------|--------------|--------------|
| -2741.465835 | -2740.308624 | -2740.237817 | -2740.420987 |

|   |             |             |             |
|---|-------------|-------------|-------------|
| O | -0.15061444 | 2.06594553  | 0.44329706  |
| O | 0.29043565  | 0.74002039  | -1.83295358 |
| N | 2.86713434  | 1.09417311  | -0.52598524 |
| N | 0.21134859  | 2.89061532  | -0.71528815 |
| C | 2.32966549  | 1.94396077  | -1.36670377 |
| C | 0.84629800  | 2.02769856  | -1.74752151 |
| C | 4.31051262  | 1.05125444  | -0.27904461 |
| C | 5.10986451  | 0.27394230  | -1.14969877 |
| C | 6.49777734  | 0.25417509  | -0.89561560 |
| C | 7.04258923  | 0.95793446  | 0.19025555  |
| C | 6.21033360  | 1.68756062  | 1.05501756  |
| C | 4.81687596  | 1.74754827  | 0.84384796  |
| C | 4.80562386  | -2.05658824 | -2.10861038 |
| C | 4.52314950  | -0.54383655 | -2.30488569 |
| C | 5.05507172  | -0.05265014 | -3.67645225 |
| C | -0.20749583 | 4.89717153  | 2.37632299  |
| C | 0.48866829  | 5.15005717  | 1.01188166  |

|   |             |             |             |
|---|-------------|-------------|-------------|
| C | 1.31948279  | 6.45683495  | 1.04628005  |
| C | -0.69016148 | 3.98601695  | -0.96808026 |
| C | -0.53651174 | 5.13068987  | -0.12370757 |
| C | -1.36806674 | 6.24738881  | -0.33242927 |
| C | -2.31826253 | 6.25881989  | -1.36638286 |
| C | -2.46503722 | 5.13081941  | -2.18404500 |
| C | -1.68458242 | 3.96806411  | -1.99285656 |
| C | 3.78371817  | 1.67773390  | 3.14789942  |
| C | 3.90874035  | 2.48862433  | 1.82912140  |
| C | 4.39553605  | 3.93231269  | 2.10706755  |
| C | -3.44766930 | 2.30320049  | -2.76728215 |
| C | -1.96984570 | 2.75672830  | -2.88981658 |
| C | -1.61540756 | 3.05259172  | -4.37233066 |
| H | 3.03103294  | 2.63137582  | -1.83302465 |
| H | 0.80862836  | 2.58555456  | -2.69718741 |
| H | 7.15165917  | -0.32261369 | -1.54451998 |
| H | 8.11481934  | 0.92887833  | 0.36965215  |
| H | 6.64483776  | 2.21120367  | 1.90194988  |
| H | 3.43433352  | -0.42576353 | -2.30874402 |
| H | 1.17194991  | 4.31271201  | 0.83848318  |
| H | 5.88211162  | -2.27240102 | -2.13007510 |
| H | 4.32939665  | -2.63433869 | -2.91157989 |
| H | 4.40383354  | -2.40829800 | -1.15119002 |
| H | 4.82532676  | 1.00839537  | -3.83952465 |
| H | 4.59417305  | -0.62846025 | -4.48936598 |
| H | 6.14365176  | -0.17524788 | -3.75192234 |
| H | -0.94070854 | 5.68558715  | 2.59859195  |
| H | 0.53280921  | 4.88313640  | 3.18925947  |
| H | -0.72015337 | 3.93022043  | 2.35933819  |
| H | 1.79510840  | 6.65420382  | 0.07635229  |
| H | 2.10926418  | 6.38031443  | 1.80618550  |
| H | 0.70397851  | 7.32942907  | 1.30263038  |
| H | -1.26330613 | 7.12049233  | 0.30692446  |
| H | -2.94232529 | 7.13543301  | -1.52695177 |
| H | -3.21425692 | 5.14021419  | -2.97253240 |
| H | 2.90072617  | 2.55584506  | 1.40531137  |
| H | -1.36453981 | 1.90826996  | -2.56429852 |
| H | 4.75974699  | 1.56824208  | 3.64049854  |
| H | 3.37712936  | 0.68020853  | 2.94978370  |
| H | 3.10447306  | 2.19029264  | 3.84105326  |
| H | 3.68275840  | 4.44313355  | 2.76676150  |
| H | 4.47933068  | 4.51519982  | 1.18077899  |
| H | 5.37390382  | 3.94412597  | 2.60522646  |
| H | -3.68489774 | 2.03400410  | -1.73086443 |
| H | -3.61409305 | 1.41861915  | -3.39748985 |
| H | -4.14943342 | 3.08374023  | -3.09032436 |
| H | -0.56617611 | 3.35838593  | -4.48289968 |
| H | -2.23985089 | 3.85854808  | -4.78228059 |
| H | -1.77217696 | 2.15570680  | -4.98662808 |
| O | -0.35445713 | -0.73326269 | 1.93155664  |
| O | 2.17679958  | 0.15058194  | 0.20760844  |
| O | -2.21263740 | -0.47190596 | -0.20168183 |

|   |             |             |             |
|---|-------------|-------------|-------------|
| N | -0.27569773 | -3.18369812 | 0.22709482  |
| N | -2.96976401 | -1.32411945 | 0.50321304  |
| C | -1.41736916 | -3.31539872 | 0.89020778  |
| C | -2.59998536 | -2.50702911 | 0.98994482  |
| C | 0.74529760  | -4.24086399 | 0.29645600  |
| C | 1.54236521  | -4.34242358 | 1.46226601  |
| C | 2.51300294  | -5.36949217 | 1.47227930  |
| C | 2.68348035  | -6.22223776 | 0.37219241  |
| C | 1.88930201  | -6.06856961 | -0.77704865 |
| C | 0.89872278  | -5.06889479 | -0.84451923 |
| C | 2.74248280  | -2.61253803 | 2.87767507  |
| C | 1.42008806  | -3.39500541 | 2.66111038  |
| C | 1.01776654  | -4.16746249 | 3.94472368  |
| C | -5.56031021 | -1.28617604 | -2.71202834 |
| C | -5.07611013 | -2.01237703 | -1.43118973 |
| C | -5.72129508 | -3.41995996 | -1.31957526 |
| C | -4.34252691 | -0.84967873 | 0.76319319  |
| C | -5.35051312 | -1.18182803 | -0.17280318 |
| C | -6.65267244 | -0.71689459 | 0.10424192  |
| C | -6.91523659 | 0.05428255  | 1.24849626  |
| C | -5.88132225 | 0.37932061  | 2.14012244  |
| C | -4.55900266 | -0.06362717 | 1.91934918  |
| C | 0.92293609  | -4.16637572 | -3.20617455 |
| C | 0.07123709  | -4.87793129 | -2.11956807 |
| C | -0.51529415 | -6.20902743 | -2.65178884 |
| C | -3.20366557 | 1.84585417  | 2.89212707  |
| C | -3.44021999 | 0.31242610  | 2.89609757  |
| C | -3.74977295 | -0.19671238 | 4.32801335  |
| H | -1.47802964 | -4.23904066 | 1.45491413  |
| H | -3.38185587 | -2.97173068 | 1.58051502  |
| H | 3.14609555  | -5.48769862 | 2.34720065  |
| H | 3.44076731  | -7.00201589 | 0.40464980  |
| H | 2.04009579  | -6.72944394 | -1.62584847 |
| H | 0.65518193  | -2.63298713 | 2.46975834  |
| H | -3.99297967 | -2.14579392 | -1.53626242 |
| H | 3.58679753  | -3.28098693 | 3.09678103  |
| H | 2.62241260  | -1.92432588 | 3.72364810  |
| H | 2.98979368  | -2.01263583 | 1.99395843  |
| H | 0.07101761  | -4.71012687 | 3.81308217  |
| H | 0.88856870  | -3.46189281 | 4.77485963  |
| H | 1.78310659  | -4.89914019 | 4.23841862  |
| H | -6.65119005 | -1.16464358 | -2.72161351 |
| H | -5.28217096 | -1.86696578 | -3.60117068 |
| H | -5.10556221 | -0.29322648 | -2.79413962 |
| H | -5.35095779 | -3.96657804 | -0.44217850 |
| H | -5.49501111 | -4.01557202 | -2.21368141 |
| H | -6.81289979 | -3.34653111 | -1.23030342 |
| H | -7.46119431 | -0.95046767 | -0.58307749 |
| H | -7.92550279 | 0.40768696  | 1.44054481  |
| H | -6.09665146 | 0.98590406  | 3.01535137  |
| H | -0.77202109 | -4.21317524 | -1.89792741 |
| H | -2.49515715 | -0.14891369 | 2.58600487  |

|    |             |             |             |
|----|-------------|-------------|-------------|
| H  | 1.79617179  | -4.77359263 | -3.48113723 |
| H  | 1.26926841  | -3.19309505 | -2.84309405 |
| H  | 0.32270190  | -4.00192435 | -4.11065471 |
| H  | -1.16174001 | -6.01130564 | -3.51671841 |
| H  | -1.11327852 | -6.72184040 | -1.88708004 |
| H  | 0.27140787  | -6.89891242 | -2.98298465 |
| H  | -2.91286886 | 2.19759951  | 1.89602650  |
| H  | -2.38641816 | 2.09189925  | 3.58122817  |
| H  | -4.09978918 | 2.39667888  | 3.21066169  |
| H  | -3.90418141 | -1.28431883 | 4.34558766  |
| H  | -4.64690889 | 0.27829842  | 4.74825517  |
| H  | -2.90494894 | 0.03406754  | 4.98852385  |
| O  | 0.04305983  | -2.13806932 | -0.56123109 |
| Zr | -0.02801207 | -0.00623689 | 0.24645827  |

## 9.4 Structures with seven oxygen atoms

### Oxo Peroxo Complex (conformation 1)

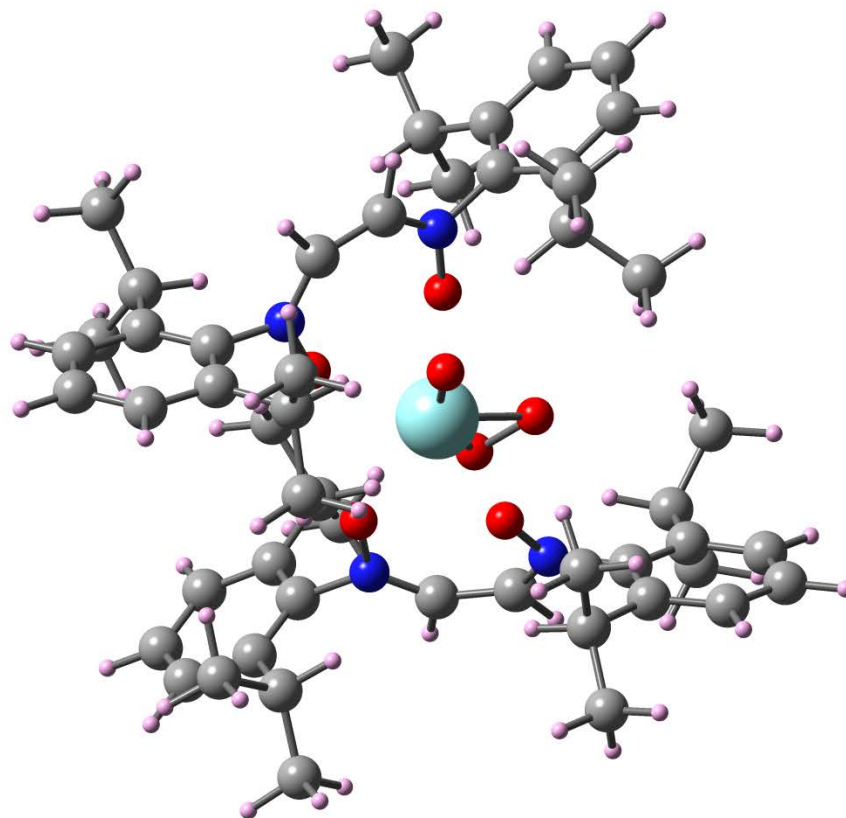

Fig. S112: ONCCNO Oxo Peroxo Complex (conformation 1)

| SCF          | E <sub>ZP</sub> | H            | G            |
|--------------|-----------------|--------------|--------------|
| -2816.583435 | -2815.423771    | -2815.351243 | -2815.536655 |

|    |             |             |             |
|----|-------------|-------------|-------------|
| Zr | 0.37014364  | 0.06807951  | 0.15375743  |
| O  | 1.54548408  | -1.72013343 | 0.86951966  |
| O  | -1.80850447 | 0.88488059  | 0.12069129  |
| O  | 1.01459570  | -0.51938233 | -2.00591122 |
| O  | 2.06557047  | 0.09251999  | -1.15113169 |
| N  | 0.37496681  | 3.33811814  | 0.08973059  |
| N  | -2.27928920 | 1.72432221  | 1.06166358  |
| N  | -0.80823693 | -2.61659949 | -1.08483342 |
| N  | 2.30252432  | -2.34483211 | -0.09874037 |
| C  | -0.54920915 | 3.57714566  | 1.01920710  |
| C  | -1.71209074 | 2.86284322  | 1.44841488  |
| C  | 0.36417823  | -3.04670466 | -1.55744822 |
| C  | 1.73348595  | -2.92277951 | -1.15421137 |
| C  | 1.43237881  | 4.33892468  | -0.14199176 |
| C  | 2.52839768  | 4.37230149  | 0.75151366  |

|   |             |             |             |
|---|-------------|-------------|-------------|
| C | 3.51682832  | 5.34957537  | 0.49832049  |
| C | 3.41728458  | 6.21662917  | -0.59949239 |
| C | 2.32980615  | 6.12310561  | -1.48475998 |
| C | 1.30821848  | 5.17427043  | -1.27917666 |
| C | 3.96631011  | 2.52049867  | 1.70781342  |
| C | 2.69768142  | 3.38986126  | 1.91582881  |
| C | 2.74944830  | 4.12832667  | 3.27815031  |
| C | -1.95007525 | -1.29440351 | 3.59875604  |
| C | -2.15173282 | 0.24464714  | 3.61840809  |
| C | -2.07906896 | 0.79453824  | 5.06559283  |
| C | -3.53940182 | 1.29946344  | 1.69775919  |
| C | -3.47166794 | 0.61404482  | 2.93484781  |
| C | -4.70272412 | 0.23543947  | 3.51479466  |
| C | -5.92323293 | 0.51728361  | 2.88273532  |
| C | -5.94493750 | 1.17780380  | 1.64336146  |
| C | -4.74789565 | 1.57834772  | 1.01533323  |
| C | 0.64318683  | 4.17577024  | -3.49925390 |
| C | 0.16384905  | 5.02022801  | -2.28528447 |
| C | -0.42188016 | 6.37713561  | -2.74556374 |
| C | -5.51506111 | 1.41902388  | -1.40421977 |
| C | -4.79096913 | 2.28645817  | -0.34241577 |
| C | -5.45305815 | 3.68509959  | -0.22486015 |
| C | -2.05412486 | -3.06407840 | -1.71533631 |
| C | -2.46754895 | -2.46775635 | -2.93283680 |
| C | -3.67698341 | -2.93406334 | -3.49371211 |
| C | -4.43426075 | -3.93354288 | -2.86422832 |
| C | -4.00334292 | -4.48742232 | -1.64765575 |
| C | -2.80515497 | -4.05851855 | -1.04141773 |
| C | -2.49707967 | -0.02145015 | -3.59256908 |
| C | -1.68925949 | -1.34576914 | -3.62722962 |
| C | -1.30879816 | -1.72530818 | -5.08140565 |
| C | 2.88120084  | -2.58189496 | 3.67584314  |
| C | 3.00324705  | -3.57058971 | 2.48597599  |
| C | 3.31442912  | -5.00683490 | 2.98089602  |
| C | 3.72540927  | -2.50755711 | 0.20940247  |
| C | 4.04837978  | -3.07254968 | 1.47784611  |
| C | 5.41336615  | -3.19158102 | 1.80671936  |
| C | 6.41783278  | -2.79986626 | 0.90951712  |
| C | 6.06877181  | -2.28106084 | -0.34363829 |
| C | 4.72029856  | -2.11104797 | -0.72801856 |
| C | -3.42086964 | -4.43960376 | 1.39558271  |
| C | -2.35602262 | -4.66518040 | 0.29125936  |
| C | -2.02579092 | -6.17352900 | 0.13801919  |
| C | 5.12293565  | -0.14309114 | -2.29658114 |
| C | 4.43553400  | -1.51968662 | -2.11559378 |
| C | 4.87294496  | -2.50490329 | -3.23352736 |
| H | -0.39360817 | 4.51508719  | 1.53981890  |
| H | -2.25871869 | 3.36013778  | 2.24213813  |
| H | 0.24354951  | -3.67440755 | -2.43504018 |
| H | 2.42470922  | -3.43401544 | -1.81260014 |
| H | 4.37636374  | 5.41707642  | 1.15958859  |
| H | 4.19371103  | 6.95753293  | -0.77544445 |

|   |             |             |             |
|---|-------------|-------------|-------------|
| H | 2.27771726  | 6.78912032  | -2.34116837 |
| H | 1.85630827  | 2.68794373  | 1.94768121  |
| H | -1.30472419 | 0.66438292  | 3.06342548  |
| H | 4.88356120  | 3.12591159  | 1.71026455  |
| H | 3.91349592  | 1.97527907  | 0.75814202  |
| H | 4.03993246  | 1.78041119  | 2.51403995  |
| H | 3.61343256  | 4.80379846  | 3.34487246  |
| H | 2.82951226  | 3.39651223  | 4.09174585  |
| H | 1.84330455  | 4.72598985  | 3.44976780  |
| H | -2.73931880 | -1.81512417 | 4.15993064  |
| H | -0.98188716 | -1.54114604 | 4.05190766  |
| H | -1.94276968 | -1.67390260 | 2.57033246  |
| H | -2.20395702 | 1.88585569  | 5.09120084  |
| H | -1.09864791 | 0.55771915  | 5.49713544  |
| H | -2.84750832 | 0.35323558  | 5.71521965  |
| H | -4.69924829 | -0.29063855 | 4.46546826  |
| H | -6.85738180 | 0.21546234  | 3.35062151  |
| H | -6.89655748 | 1.37890072  | 1.15845688  |
| H | -0.64912740 | 4.45764990  | -1.80907437 |
| H | -3.76474650 | 2.42979993  | -0.69837999 |
| H | 1.46654936  | 4.68006670  | -4.02315270 |
| H | -0.18037650 | 4.03618087  | -4.21249006 |
| H | 0.98949291  | 3.19019603  | -3.17102509 |
| H | 0.30366583  | 6.95641150  | -3.33066823 |
| H | -0.73847242 | 6.99257801  | -1.89328905 |
| H | -1.29528587 | 6.20634688  | -3.38841379 |
| H | -5.04454030 | 0.43340794  | -1.49182896 |
| H | -5.47072510 | 1.90943757  | -2.38552738 |
| H | -6.57301131 | 1.27209004  | -1.15066711 |
| H | -6.49668485 | 3.60408915  | 0.10605985  |
| H | -5.44709490 | 4.19255346  | -1.19847269 |
| H | -4.92267253 | 4.32184072  | 0.49540256  |
| H | -4.02768324 | -2.50448352 | -4.42844087 |
| H | -5.36140936 | -4.27667442 | -3.31761208 |
| H | -4.60209596 | -5.25519897 | -1.16454593 |
| H | -0.75749528 | -1.15259736 | -3.08920674 |
| H | 2.02444886  | -3.59148848 | 2.00083195  |
| H | -3.45163518 | -0.11552208 | -4.12923454 |
| H | -1.91420409 | 0.77893810  | -4.06624521 |
| H | -2.70564813 | 0.27749578  | -2.55858741 |
| H | -0.72586457 | -2.65541605 | -5.11560273 |
| H | -0.69793049 | -0.92842942 | -5.52368463 |
| H | -2.19609103 | -1.86149366 | -5.71460665 |
| H | 3.83926004  | -2.47460598 | 4.20389169  |
| H | 2.13609816  | -2.94687003 | 4.39635627  |
| H | 2.56069665  | -1.59911442 | 3.31625588  |
| H | 3.42229127  | -5.70704873 | 2.14181026  |
| H | 2.49444351  | -5.36197261 | 3.61948182  |
| H | 4.23521708  | -5.05105436 | 3.57683594  |
| H | 5.69073890  | -3.60834482 | 2.77081496  |
| H | 7.46500100  | -2.90323163 | 1.18422086  |
| H | 6.85241690  | -1.98414062 | -1.03503258 |



|   |             |             |             |
|---|-------------|-------------|-------------|
| H | -1.44652990 | -4.15211446 | 0.61948064  |
| H | 3.36908918  | -1.31969545 | -2.21618636 |
| H | -4.36133181 | -4.95587474 | 1.16100931  |
| H | -3.63636086 | -3.37193913 | 1.51644847  |
| H | -3.05567713 | -4.82676526 | 2.35600716  |
| H | -1.66995717 | -6.58361237 | 1.09238326  |
| H | -1.24471075 | -6.33796544 | -0.61582906 |
| H | -2.91125471 | -6.74768034 | -0.16560667 |
| H | 4.76268888  | 0.55789053  | -1.53681562 |
| H | 4.86260054  | 0.27067353  | -3.27941507 |
| H | 6.21786813  | -0.20850549 | -2.23452354 |
| H | 4.37520088  | -3.48142877 | -3.14211142 |
| H | 5.95580887  | -2.68746471 | -3.20940291 |
| H | 4.62257648  | -2.08839647 | -4.21800244 |
| O | 0.51253523  | 0.85523978  | 1.82309853  |
| O | 0.46599085  | 2.24880331  | -0.67683113 |
| O | -0.99608180 | -1.72540730 | -0.06230729 |

## Oxo Peroxo Complex (conformation 2)

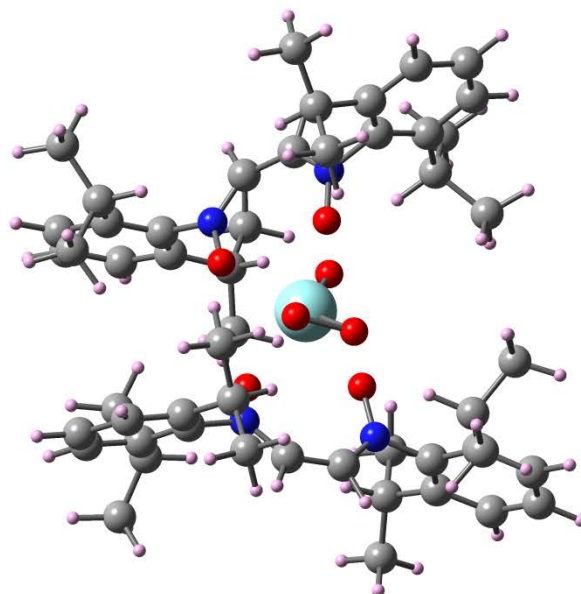

Fig. S113: ONCCNO Oxo Peroxo Complex (conformation 2)

| SCF           | E <sub>ZP</sub> | H            | G            |
|---------------|-----------------|--------------|--------------|
| -2816.5798682 | -2815.420531    | -2815.347816 | -2815.534821 |

|    |             |             |             |
|----|-------------|-------------|-------------|
| Zr | -0.16660000 | 0.25876200  | 0.05097200  |
| O  | 1.99207700  | -0.43063000 | 0.17026300  |
| O  | -2.33299800 | -0.02760900 | 0.72825900  |
| O  | 0.12164400  | 1.11540100  | 1.68006100  |
| N  | -1.09963800 | -2.43389700 | -1.20389400 |
| N  | -3.40299200 | -0.54975200 | 0.11272000  |
| N  | 1.85458200  | 2.88217500  | -0.02949800 |
| N  | 2.83568200  | -0.02048400 | 1.14614600  |
| C  | -2.38935200 | -2.24117600 | -1.49708600 |
| C  | -3.40167100 | -1.46189300 | -0.87229700 |
| C  | 2.74488600  | 2.50482500  | 0.89431200  |
| C  | 3.14216400  | 1.24178500  | 1.42832800  |
| C  | -0.29416300 | -3.40451400 | -1.95160200 |
| C  | -0.05700300 | -3.22187900 | -3.34285800 |
| C  | 0.73089000  | -4.19847900 | -3.99130300 |
| C  | 1.26241600  | -5.29418000 | -3.29905100 |
| C  | 0.99319900  | -5.45501600 | -1.93160300 |
| C  | 0.19880400  | -4.52845500 | -1.22757800 |
| C  | 0.52242300  | -1.31729400 | -4.93582900 |
| C  | -0.60587600 | -2.05631400 | -4.17409000 |
| C  | -1.69879400 | -2.55099100 | -5.16021500 |
| C  | -4.35438900 | 3.15242800  | -1.36770800 |
| C  | -4.57633400 | 1.62272000  | -1.48920000 |
| C  | -5.39642500 | 1.28816800  | -2.76330800 |
| C  | -4.68187800 | 0.02771000  | 0.54793500  |

|   |             |             |             |
|---|-------------|-------------|-------------|
| C | -5.25134700 | 1.06165300  | -0.23275200 |
| C | -6.48681100 | 1.58386400  | 0.20932400  |
| C | -7.09421000 | 1.11250300  | 1.38330400  |
| C | -6.47639500 | 0.11204800  | 2.15279500  |
| C | -5.24856700 | -0.45426200 | 1.75287300  |
| C | 1.15380700  | -4.60526600 | 1.12049800  |
| C | -0.11436800 | -4.80123800 | 0.24978500  |
| C | -0.72081100 | -6.21373700 | 0.45611100  |
| C | -3.80841900 | -0.77858700 | 3.80019400  |
| C | -4.53793800 | -1.49122400 | 2.62734500  |
| C | -5.49109900 | -2.59372800 | 3.14857600  |
| C | 1.73327600  | 4.31562500  | -0.34813500 |
| C | 0.93890600  | 5.11316000  | 0.50686300  |
| C | 0.84582700  | 6.48478500  | 0.18286100  |
| C | 1.48897200  | 7.00583400  | -0.95045000 |
| C | 2.23098900  | 6.16656900  | -1.79958000 |
| C | 2.36818900  | 4.79135600  | -1.52042300 |
| C | -1.34629000 | 4.78593100  | 1.55788600  |
| C | 0.17758500  | 4.54011400  | 1.70819100  |
| C | 0.70218600  | 5.13253600  | 3.04188000  |
| C | 4.54250900  | -2.68204000 | -1.11936600 |
| C | 4.96616700  | -1.52835100 | -0.17162600 |
| C | 6.49121400  | -1.26436800 | -0.25821100 |
| C | 3.47677900  | -1.10519100 | 1.90279600  |
| C | 4.51674400  | -1.82348300 | 1.26280600  |
| C | 5.12585100  | -2.85951300 | 1.99960400  |
| C | 4.70799300  | -3.15758900 | 3.30720500  |
| C | 3.66182600  | -2.43494200 | 3.90021500  |
| C | 3.00628300  | -1.39257600 | 3.20798100  |
| C | 2.14407800  | 3.43197500  | -3.63648600 |
| C | 3.10075700  | 3.85407200  | -2.48540800 |
| C | 4.41143700  | 4.46196400  | -3.03985700 |
| C | 0.70281900  | -1.62904900 | 4.25365200  |
| C | 1.83862700  | -0.64740700 | 3.86453700  |
| C | 2.31504200  | 0.15894900  | 5.10111300  |
| H | -2.73489100 | -2.80972400 | -2.35216700 |
| H | -4.39485100 | -1.64239500 | -1.26863700 |
| H | 3.27894000  | 3.34442200  | 1.32436000  |
| H | 3.87213100  | 1.32595300  | 2.22642400  |
| H | 0.93689900  | -4.08598900 | -5.05183500 |
| H | 1.87527700  | -6.02389800 | -3.82305100 |
| H | 1.38988100  | -6.31886400 | -1.40543900 |
| H | -1.02872900 | -1.30374400 | -3.50427600 |
| H | -3.58232700 | 1.17816900  | -1.60487200 |
| H | 1.03045200  | -1.96360500 | -5.66503600 |
| H | 1.25882200  | -0.92340800 | -4.22826800 |
| H | 0.09780700  | -0.46205000 | -5.47636800 |
| H | -1.28770600 | -3.25572000 | -5.89619300 |
| H | -2.11961000 | -1.69823000 | -5.70850700 |
| H | -2.52494200 | -3.06218500 | -4.64485100 |
| H | -5.30379000 | 3.70406000  | -1.32595000 |
| H | -3.78868600 | 3.51144000  | -2.23625000 |

|   |             |             |             |
|---|-------------|-------------|-------------|
| H | -3.77651600 | 3.39222900  | -0.46740700 |
| H | -5.52676900 | 0.20452800  | -2.88838500 |
| H | -4.87765200 | 1.66996700  | -3.65168400 |
| H | -6.39558000 | 1.74372800  | -2.73054100 |
| H | -6.96514100 | 2.37389600  | -0.36345700 |
| H | -8.04388000 | 1.53268700  | 1.70657300  |
| H | -6.94985900 | -0.22828800 | 3.06933700  |
| H | -0.84812100 | -4.07068000 | 0.59872000  |
| H | -3.76393500 | -1.98307100 | 2.02610000  |
| H | 1.94705100  | -5.31006800 | 0.83527400  |
| H | 0.91819200  | -4.77347600 | 2.17997000  |
| H | 1.53842200  | -3.58629900 | 1.01042300  |
| H | -0.00851700 | -7.01027600 | 0.20520400  |
| H | -1.61831600 | -6.35948500 | -0.15941400 |
| H | -1.00369600 | -6.34479800 | 1.50918300  |
| H | -3.07784600 | -0.05768200 | 3.41786400  |
| H | -3.27671100 | -1.51480200 | 4.41807300  |
| H | -4.52506000 | -0.24756900 | 4.44175000  |
| H | -6.24011400 | -2.19184100 | 3.84294500  |
| H | -4.91699300 | -3.35456900 | 3.69313900  |
| H | -6.02325600 | -3.08971200 | 2.32633100  |
| H | 0.25323200  | 7.14105600  | 0.81464900  |
| H | 1.40072700  | 8.06469800  | -1.18268500 |
| H | 2.70183100  | 6.58235500  | -2.68548600 |
| H | 0.30524400  | 3.45146100  | 1.74961600  |
| H | 4.45205600  | -0.62817400 | -0.52523100 |
| H | -1.59515700 | 5.85631100  | 1.57277600  |
| H | -1.87956900 | 4.29821300  | 2.38326300  |
| H | -1.71689500 | 4.35828400  | 0.61882000  |
| H | 1.77282100  | 4.92880100  | 3.18085600  |
| H | 0.16194500  | 4.68486400  | 3.88562400  |
| H | 0.55984500  | 6.22114700  | 3.08653200  |
| H | 5.01847900  | -3.62889000 | -0.83021100 |
| H | 4.84020100  | -2.45314900 | -2.15101900 |
| H | 3.45612800  | -2.81969500 | -1.10021400 |
| H | 6.79491900  | -0.43951500 | 0.39976200  |
| H | 6.76838700  | -1.00074900 | -1.28727300 |
| H | 7.07368000  | -2.15084900 | 0.02436700  |
| H | 5.93047500  | -3.43411700 | 1.54861000  |
| H | 5.19381200  | -3.95804200 | 3.86050700  |
| H | 3.33885500  | -2.68684100 | 4.90678700  |
| H | 3.36845500  | 2.93627200  | -1.94631600 |
| H | 1.39400400  | 0.05907300  | 3.15274000  |
| H | 1.81190100  | 4.31027300  | -4.20709300 |
| H | 1.26563800  | 2.91199400  | -3.24058300 |
| H | 2.66172800  | 2.75140600  | -4.32565300 |
| H | 4.93918800  | 3.71399700  | -3.64556300 |
| H | 5.08254500  | 4.78562100  | -2.23324300 |
| H | 4.21873400  | 5.32659100  | -3.68799200 |
| H | 0.36010500  | -2.19543700 | 3.37934700  |
| H | -0.15237400 | -1.06112300 | 4.64049800  |
| H | 1.01919100  | -2.34299100 | 5.02723900  |

|   |             |             |             |
|---|-------------|-------------|-------------|
| H | 3.09159400  | 0.88865300  | 4.83318800  |
| H | 2.72719000  | -0.49574800 | 5.88158500  |
| H | 1.47004300  | 0.71092500  | 5.53165900  |
| O | -1.31169100 | 0.88839300  | -1.62809200 |
| O | -0.14252700 | 0.17362500  | -2.20556400 |
| O | -0.54468100 | -1.95164100 | -0.03978000 |
| O | 1.02545300  | 2.10257500  | -0.71062400 |

**Oxo Peroxo Complex (conformation 3)**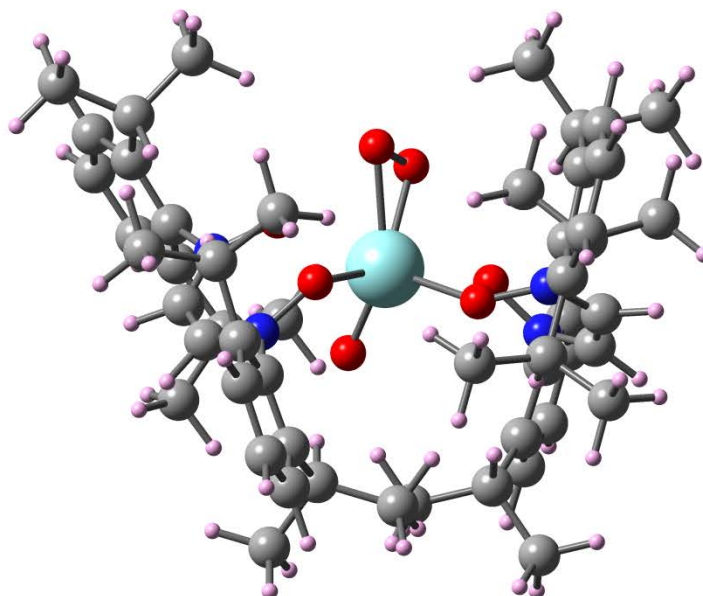

Fig. S114: ONCCNO Oxo Peroxo Complex (conformation 3)

| SCF            | E <sub>ZP</sub> | H            | G            |
|----------------|-----------------|--------------|--------------|
| -2816.57276635 | -2815.414170    | -2815.341195 | -2815.528580 |
| O              | 0.29593600      | -2.06069500  | -0.11399900  |
| O              | -0.84503700     | 2.23558600   | -0.39598500  |
| O              | 0.94111200      | 0.47407500   | 1.20064100   |
| N              | -3.19250700     | 0.43529100   | -0.57456900  |
| N              | -1.65424400     | 2.92380100   | 0.40849000   |
| N              | 3.35385300      | -0.75114300  | -0.31113200  |
| N              | 0.96623800      | -2.66147900  | 0.91211900   |
| C              | -3.66897200     | 1.61428000   | -0.15717900  |
| C              | -2.97082800     | 2.67253600   | 0.48976200   |
| C              | 3.29044300      | -1.65825500  | 0.68630800   |
| C              | 2.25253000      | -2.45736200  | 1.22441100   |
| C              | -3.98604900     | -0.41625900  | -1.46642500  |
| C              | -3.95955900     | -0.13922800  | -2.85623000  |
| C              | -4.75447600     | -0.96361100  | -3.68134500  |
| C              | -5.51156100     | -2.01597900  | -3.14405700  |
| C              | -5.48716100     | -2.27802200  | -1.76456500  |
| C              | -4.71677700     | -1.48449400  | -0.89041700  |
| C              | -2.22070400     | 0.47309800   | -4.62498800  |
| C              | -3.12196700     | 0.98702900   | -3.47326700  |
| C              | -4.03833800     | 2.14437000   | -3.95605300  |
| C              | 0.35367700      | 4.94092700   | -2.05255300  |
| C              | -0.98848100     | 5.18518800   | -1.30891400  |
| C              | -1.68413000     | 6.47276800   | -1.81777000  |
| C              | -1.06881600     | 4.10800300   | 1.04788600   |

|   |             |             |             |
|---|-------------|-------------|-------------|
| C | -0.75722900 | 5.20748200  | 0.20582900  |
| C | -0.18004000 | 6.33636500  | 0.82095300  |
| C | 0.07463800  | 6.35794400  | 2.20229400  |
| C | -0.22865900 | 5.24307500  | 2.99672700  |
| C | -0.80122000 | 4.07983700  | 2.43671300  |
| C | -4.00261000 | -3.16911300 | 0.86000100  |
| C | -4.68553200 | -1.79930500 | 0.60762800  |
| C | -6.10404200 | -1.75788600 | 1.23307800  |
| C | 0.29253600  | 2.29883300  | 3.86846900  |
| C | -1.05089700 | 2.85785100  | 3.32633700  |
| C | -2.04037100 | 3.18927600  | 4.47427200  |
| C | 4.66014300  | -0.18340500 | -0.67140300 |
| C | 5.11954500  | 0.93022000  | 0.06844600  |
| C | 6.37906700  | 1.45655900  | -0.29273800 |
| C | 7.11155500  | 0.90929000  | -1.35779700 |
| C | 6.59836300  | -0.17036800 | -2.09722100 |
| C | 5.35141500  | -0.74364500 | -1.77276800 |
| C | 4.01731500  | 3.06318300  | 0.89536200  |
| C | 4.29719900  | 1.56751500  | 1.19406900  |
| C | 5.00236300  | 1.40211400  | 2.56594400  |
| C | -0.62326500 | -5.19654600 | -1.41051500 |
| C | 0.53388900  | -5.24113500 | -0.37586300 |
| C | 1.28457800  | -6.59482100 | -0.43449700 |
| C | 0.18865400  | -3.66365800 | 1.64071400  |
| C | 0.00085200  | -4.92738600 | 1.02517600  |
| C | -0.74146600 | -5.88811500 | 1.74181100  |
| C | -1.26590000 | -5.59526400 | 3.01197200  |
| C | -1.07704800 | -4.32706800 | 3.58177600  |
| C | -0.35489500 | -3.32134400 | 2.90211600  |
| C | 4.02164500  | -1.25609400 | -3.86047500 |
| C | 4.74447400  | -1.86283200 | -2.62386100 |
| C | 5.78258000  | -2.92876300 | -3.04918900 |
| C | -1.60358900 | -1.29038500 | 3.76096700  |
| C | -0.20930400 | -1.92692300 | 3.52055100  |
| C | 0.60795300  | -1.97849200 | 4.83767700  |
| H | -4.72414400 | 1.77117000  | -0.35558300 |
| H | -3.55583900 | 3.42517500  | 1.00441500  |
| H | 4.25418300  | -1.81964500 | 1.15540400  |
| H | 2.57365900  | -3.07194900 | 2.05919300  |
| H | -4.76499600 | -0.78791800 | -4.75301700 |
| H | -6.11236600 | -2.63944300 | -3.80203000 |
| H | -6.06756300 | -3.10481700 | -1.36367200 |
| H | -2.44103300 | 1.38842000  | -2.71507900 |
| H | -1.64103300 | 4.34000200  | -1.55756400 |
| H | -2.80892400 | 0.04560800  | -5.44866100 |
| H | -1.50624900 | -0.27087600 | -4.25703800 |
| H | -1.63145600 | 1.30742900  | -5.02511200 |
| H | -4.72108400 | 1.80608800  | -4.74712900 |
| H | -3.42734700 | 2.95957800  | -4.36417800 |
| H | -4.64963600 | 2.55125900  | -3.13839300 |
| H | 1.07995500  | 5.73211900  | -1.82114100 |
| H | 0.18758500  | 4.93380100  | -3.13752100 |

|   |             |             |             |
|---|-------------|-------------|-------------|
| H | 0.77961500  | 3.97257500  | -1.77262300 |
| H | -2.62477500 | 6.66468000  | -1.28444900 |
| H | -1.91073800 | 6.37271000  | -2.88710500 |
| H | -1.04404500 | 7.35682500  | -1.70212300 |
| H | 0.07285500  | 7.20240800  | 0.21626900  |
| H | 0.52054900  | 7.24003600  | 2.65577300  |
| H | -0.00499800 | 5.26495800  | 4.05978300  |
| H | -4.07623300 | -1.04315100 | 1.11535700  |
| H | -1.49260000 | 2.05822500  | 2.72181700  |
| H | -4.56282600 | -3.98602400 | 0.38591500  |
| H | -3.94813400 | -3.37601100 | 1.93634300  |
| H | -2.98244000 | -3.17364400 | 0.46112400  |
| H | -6.75768100 | -2.52637200 | 0.80069900  |
| H | -6.58556700 | -0.78322300 | 1.07768400  |
| H | -6.04472200 | -1.94116500 | 2.31389100  |
| H | 0.87751800  | 1.87325300  | 3.04403100  |
| H | 0.09624500  | 1.49431400  | 4.59071600  |
| H | 0.87344200  | 3.07597900  | 4.38333400  |
| H | -1.62412500 | 3.93842200  | 5.16045900  |
| H | -2.25351400 | 2.28558100  | 5.06008000  |
| H | -2.99311000 | 3.58009400  | 4.09097500  |
| H | 6.77734800  | 2.30743900  | 0.25374100  |
| H | 8.07787100  | 1.33263600  | -1.62275000 |
| H | 7.16807900  | -0.56622700 | -2.93286200 |
| H | 3.31781300  | 1.07894600  | 1.25610300  |
| H | 1.24126400  | -4.45626000 | -0.66541700 |
| H | 4.94241400  | 3.65508400  | 0.85955800  |
| H | 3.37425800  | 3.48269000  | 1.67950100  |
| H | 3.49694700  | 3.17735100  | -0.06277200 |
| H | 5.17362100  | 0.34394000  | 2.80562000  |
| H | 4.37981000  | 1.83194700  | 3.36134100  |
| H | 5.97556400  | 1.91189700  | 2.58335400  |
| H | -1.39253500 | -5.94582700 | -1.17791000 |
| H | -0.23856500 | -5.40231500 | -2.41793900 |
| H | -1.08792700 | -4.20490600 | -1.42019000 |
| H | 2.10106100  | -6.63543700 | 0.29833600  |
| H | 1.71484000  | -6.73881200 | -1.43406300 |
| H | 0.61449900  | -7.44255200 | -0.24071600 |
| H | -0.90705700 | -6.86968000 | 1.30626500  |
| H | -1.82782700 | -6.35348400 | 3.55269800  |
| H | -1.50049500 | -4.10983800 | 4.55900100  |
| H | 3.97549600  | -2.37290300 | -2.02992300 |
| H | 0.31739400  | -1.26568900 | 2.82280800  |
| H | 4.72640300  | -0.68450000 | -4.48035500 |
| H | 3.20283000  | -0.59901500 | -3.55041900 |
| H | 3.59558200  | -2.05902200 | -4.47690900 |
| H | 5.27425300  | -3.75533900 | -3.56254900 |
| H | 6.32159700  | -3.34024500 | -2.18541600 |
| H | 6.52345500  | -2.52032800 | -3.74887600 |
| H | -2.15930200 | -1.21210800 | 2.81889100  |
| H | -1.48342500 | -0.27882600 | 4.16772400  |
| H | -2.20357400 | -1.87386000 | 4.47284100  |



|    |             |             |             |
|----|-------------|-------------|-------------|
| H  | 1.60809800  | -2.40118200 | 4.67322700  |
| H  | 0.10800300  | -2.58863300 | 5.60247700  |
| H  | 0.73465600  | -0.96569200 | 5.24087900  |
| O  | 0.45890100  | 1.06434400  | -2.34133500 |
| O  | 0.38308700  | -0.36465600 | -2.66660300 |
| O  | 2.34586500  | -0.29321600 | -1.04674200 |
| O  | -2.03187900 | -0.09012300 | -0.12410900 |
| Zr | 0.16581700  | 0.11211400  | -0.45321000 |

**Oxo Peroxo Complex (butterfly conformation)**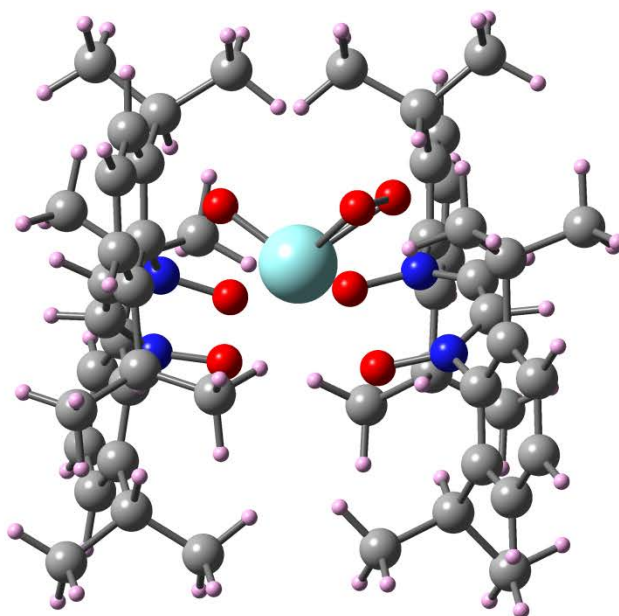

Fig. S115: ONCCNO Oxo Peroxo Complex (butterfly conformation)

| SCF           | E <sub>ZP</sub> | H            | G            |
|---------------|-----------------|--------------|--------------|
| -2816.6033332 | -2815.443249    | -2815.370701 | -2815.556085 |
| O             | 0.10342200      | 1.55687700   | 1.12995500   |
| O             | -2.35724700     | -0.38127600  | -0.11024500  |
| O             | -1.12630800     | 1.59459000   | -1.79200900  |
| N             | -0.29100800     | -2.74081500  | 0.94011100   |
| N             | -2.97399500     | -1.51306700  | -0.48004800  |
| N             | 2.83136200      | 1.21055800   | -0.65444900  |
| N             | 0.38609000      | 2.84243200   | 0.82965000   |
| C             | -1.33120100     | -3.28135000  | 0.31251000   |
| C             | -2.50367300     | -2.74414700  | -0.31924400  |
| C             | 2.51338500      | 2.49519900   | -0.51324300  |
| C             | 1.43334000      | 3.21804600   | 0.09868500   |
| C             | 0.71956200      | -3.63144200  | 1.54096600   |
| C             | 1.68641400      | -4.22049500  | 0.69220700   |
| C             | 2.63581300      | -5.06468500  | 1.31075400   |
| C             | 2.62327600      | -5.28271900  | 2.69644100   |
| C             | 1.66102200      | -4.65622600  | 3.50616200   |
| C             | 0.68275200      | -3.81037200  | 2.94530200   |
| C             | 3.10588400      | -3.32790400  | -1.21034700  |
| C             | 1.74905200      | -3.96853600  | -0.81829500  |
| C             | 1.50550400      | -5.27873200  | -1.61227500  |
| C             | -2.85632200     | -0.24733400  | -4.26897000  |
| C             | -3.13407500     | -1.52939300  | -3.43802200  |
| C             | -3.31563300     | -2.76525200  | -4.35710100  |
| C             | -4.28632100     | -1.31098700  | -1.11991000  |

|   |             |             |             |
|---|-------------|-------------|-------------|
| C | -4.35420800 | -1.32755100 | -2.53297900 |
| C | -5.62939100 | -1.11063600 | -3.10195100 |
| C | -6.75438200 | -0.87162300 | -2.29946200 |
| C | -6.63557800 | -0.83297400 | -0.89972800 |
| C | -5.39144300 | -1.04748700 | -0.27369300 |
| C | 0.36065600  | -1.94376800 | 4.61841800  |
| C | -0.33247700 | -3.09577700 | 3.84231400  |
| C | -1.05338700 | -4.06803200 | 4.80908100  |
| C | -5.25706000 | 0.56541600  | 1.66555700  |
| C | -5.25307500 | -0.93068600 | 1.24748300  |
| C | -6.34194700 | -1.72642400 | 2.00881300  |
| C | 4.13635700  | 0.84939900  | -1.23008700 |
| C | 4.26732500  | 0.77509000  | -2.63836000 |
| C | 5.53728900  | 0.40638000  | -3.13531500 |
| C | 6.60480500  | 0.12007500  | -2.27110000 |
| C | 6.42800200  | 0.18490900  | -0.87931900 |
| C | 5.18252800  | 0.54421200  | -0.32521700 |
| C | 2.68933000  | -0.26753200 | -4.32607900 |
| C | 3.11387600  | 1.04283200  | -3.60968200 |
| C | 3.47671700  | 2.14566200  | -4.63712100 |
| C | -0.54748600 | 1.95488800  | 4.43990200  |
| C | 0.34237500  | 3.01887400  | 3.74435400  |
| C | 1.15891100  | 3.82949500  | 4.78315900  |
| C | -0.49461600 | 3.85605800  | 1.43098600  |
| C | -0.51208800 | 3.92448700  | 2.85025800  |
| C | -1.36381200 | 4.87910000  | 3.43973600  |
| C | -2.15125700 | 5.73315900  | 2.65082600  |
| C | -2.10336700 | 5.64285900  | 1.25329500  |
| C | -1.28054900 | 4.69708700  | 0.60070900  |
| C | 5.26043200  | -0.80737600 | 1.82728700  |
| C | 4.99912700  | 0.58474900  | 1.19563500  |
| C | 5.90209800  | 1.66727000  | 1.84343500  |
| C | -2.72745800 | 4.42101800  | -1.47517400 |
| C | -1.29238300 | 4.63340800  | -0.93139600 |
| C | -0.65834700 | 5.91317000  | -1.54054800 |
| H | -1.29667200 | -4.36501000 | 0.29873100  |
| H | -3.16204900 | -3.50474500 | -0.72385700 |
| H | 3.26484900  | 3.15155600  | -0.94077500 |
| H | 1.51437200  | 4.29162300  | -0.02339000 |
| H | 3.39428900  | -5.54435300 | 0.69815600  |
| H | 3.36716900  | -5.93493300 | 3.14811800  |
| H | 1.66994100  | -4.82546200 | 4.57935800  |
| H | 0.97903400  | -3.24631300 | -1.11626800 |
| H | -2.23408500 | -1.69267100 | -2.83430700 |
| H | 3.95758200  | -3.97648000 | -0.96136900 |
| H | 3.23539700  | -2.36268400 | -0.70832200 |
| H | 3.12463500  | -3.14331700 | -2.29171700 |
| H | 2.28503800  | -6.02771100 | -1.41465200 |
| H | 1.50743800  | -5.06339800 | -2.68802300 |
| H | 0.53580300  | -5.73130700 | -1.36176400 |
| H | -3.71557800 | 0.02588000  | -4.89814000 |
| H | -1.99193600 | -0.41930600 | -4.92307900 |

|   |             |             |             |
|---|-------------|-------------|-------------|
| H | -2.60488700 | 0.59368700  | -3.61273500 |
| H | -3.49570900 | -3.68138500 | -3.77684900 |
| H | -2.40605700 | -2.91595900 | -4.95178400 |
| H | -4.15605400 | -2.63920000 | -5.05364500 |
| H | -5.73199100 | -1.11683100 | -4.18352700 |
| H | -7.72339300 | -0.70296300 | -2.76353000 |
| H | -7.51317400 | -0.62979100 | -0.29243600 |
| H | -1.09857600 | -2.63176600 | 3.21037200  |
| H | -4.27997100 | -1.33897200 | 1.54628100  |
| H | 1.15153000  | -2.33116600 | 5.27491300  |
| H | -0.37067500 | -1.41189500 | 5.24102900  |
| H | 0.80505600  | -1.22634200 | 3.92012800  |
| H | -0.35856900 | -4.51114700 | 5.53399300  |
| H | -1.54135300 | -4.88792400 | 4.26615300  |
| H | -1.82185000 | -3.52877400 | 5.37837800  |
| H | -4.43804900 | 1.10310300  | 1.17617500  |
| H | -5.13124100 | 0.65768900  | 2.75264700  |
| H | -6.20472300 | 1.04658100  | 1.38892500  |
| H | -7.34372900 | -1.31328400 | 1.83529800  |
| H | -6.15199300 | -1.67999000 | 3.08918200  |
| H | -6.35564600 | -2.78204200 | 1.70761600  |
| H | 5.68462200  | 0.33900200  | -4.20974900 |
| H | 7.57219100  | -0.16078100 | -2.68112000 |
| H | 7.25931000  | -0.04987400 | -0.21948200 |
| H | 2.23185200  | 1.38713000  | -3.06105200 |
| H | 1.05310800  | 2.47042400  | 3.11869800  |
| H | 3.52049000  | -0.70554400 | -4.89711200 |
| H | 1.86713500  | -0.05555100 | -5.02079900 |
| H | 2.32474800  | -1.00612400 | -3.60358200 |
| H | 3.77814300  | 3.07790500  | -4.14021600 |
| H | 2.60268500  | 2.36452800  | -5.26311000 |
| H | 4.29626200  | 1.83791200  | -5.30113700 |
| H | -1.30439000 | 2.42850500  | 5.08002600  |
| H | 0.06810900  | 1.29766400  | 5.06846300  |
| H | -1.05530100 | 1.33972800  | 3.68959300  |
| H | 1.78263400  | 4.59162400  | 4.29791400  |
| H | 1.81807900  | 3.15564200  | 5.34638200  |
| H | 0.51054500  | 4.33733400  | 5.50881700  |
| H | -1.40437700 | 4.96023800  | 4.52244300  |
| H | -2.80048100 | 6.46530600  | 3.12539500  |
| H | -2.72233000 | 6.30338900  | 0.65270500  |
| H | 3.95745900  | 0.83891300  | 1.41876700  |
| H | -0.72592800 | 3.76452200  | -1.27309600 |
| H | 6.29629200  | -1.13457300 | 1.66708000  |
| H | 4.59154300  | -1.56174400 | 1.39798200  |
| H | 5.08286700  | -0.76977400 | 2.91015600  |
| H | 5.72758000  | 1.70944000  | 2.92671300  |
| H | 5.69873700  | 2.66199400  | 1.42553600  |
| H | 6.96599500  | 1.44848900  | 1.68347400  |
| H | -3.15317000 | 3.49549400  | -1.07378500 |
| H | -2.68946600 | 4.31475300  | -2.56593800 |
| H | -3.39567700 | 5.25954800  | -1.23314300 |

|    |             |             |             |
|----|-------------|-------------|-------------|
| H  | 0.37429200  | 6.06631300  | -1.19530000 |
| H  | -1.23092600 | 6.81303700  | -1.27655000 |
| H  | -0.63889200 | 5.83208300  | -2.63472200 |
| O  | -0.22817400 | -1.50284400 | -1.76908300 |
| O  | 0.38484700  | 1.66763300  | -1.99488400 |
| O  | 2.07411400  | 0.14467100  | -0.30263000 |
| O  | -0.04261800 | -1.43373400 | 1.08241600  |
| Zr | -0.17562800 | 0.04246300  | -0.74121200 |

$\eta^2$ -Ozone Complex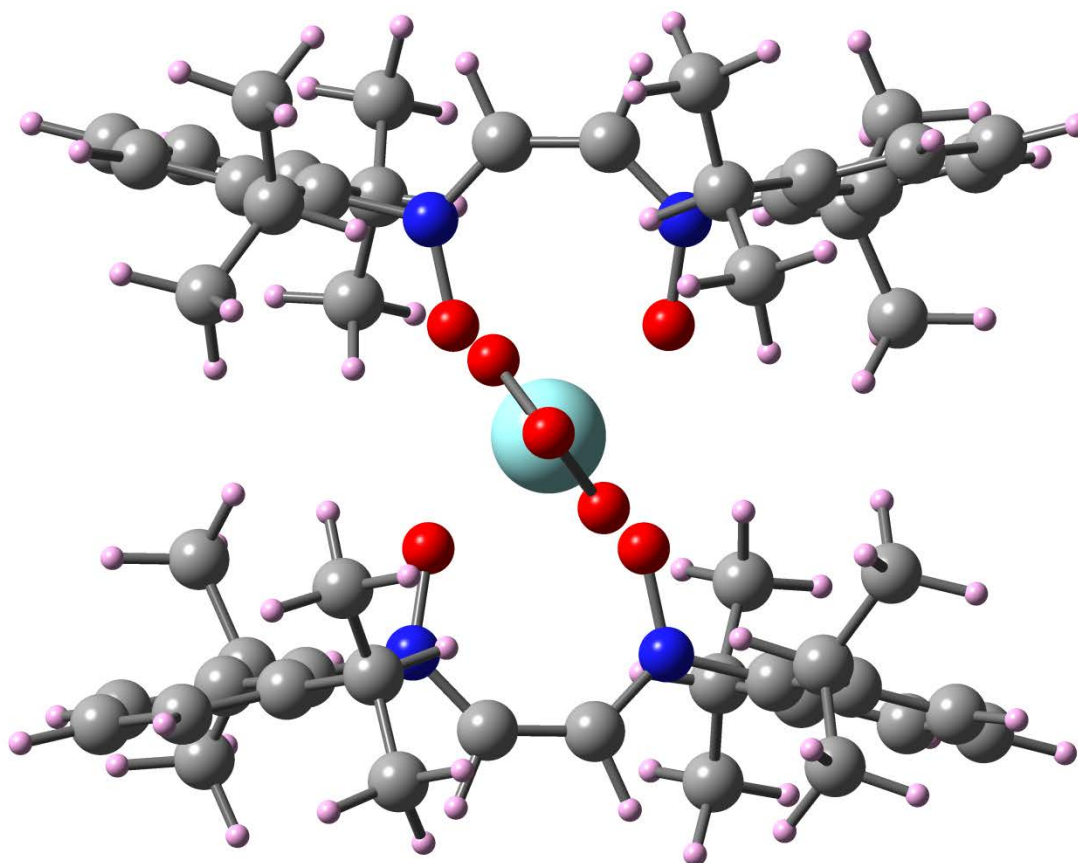Fig. S116: ONCCNO  $\eta^2$ -Ozone Complex

| SCF          | E <sub>ZP</sub> | H            | G            |
|--------------|-----------------|--------------|--------------|
| -2816.572522 | -2815.414334    | -2815.341422 | -2815.530360 |

|   |             |             |             |
|---|-------------|-------------|-------------|
| O | -1.64639400 | 1.25230300  | 0.14826600  |
| O | 1.64650300  | -1.25210700 | 0.14882900  |
| O | 0.59949200  | 0.99542700  | -2.11220100 |
| N | -1.20847900 | -2.87432300 | 0.62642000  |
| N | 1.97245600  | -2.54850500 | -0.18515200 |
| N | 1.20849300  | 2.87439700  | 0.62623200  |
| N | -1.97248400 | 2.54874900  | -0.18527200 |
| C | -0.21147100 | -3.75338500 | 0.32181500  |
| C | 1.13093800  | -3.61016200 | -0.05150100 |
| C | 0.21151500  | 3.75349300  | 0.32161200  |
| C | -1.13091700 | 3.61035800  | -0.05163700 |
| C | -2.54440000 | -3.33866800 | 0.96973900  |
| C | -2.84893800 | -3.55699900 | 2.33739700  |
| C | -4.14608500 | -4.01433000 | 2.64890300  |
| C | -5.09433600 | -4.23499300 | 1.63658100  |
| C | -4.76952700 | -3.98728300 | 0.29358600  |

|   |             |             |             |
|---|-------------|-------------|-------------|
| C | -3.48787500 | -3.52236400 | -0.07187600 |
| C | -2.26878400 | -2.00326700 | 4.24897100  |
| C | -1.84161400 | -3.26614600 | 3.45320400  |
| C | -1.64313000 | -4.47848300 | 4.39759700  |
| C | 4.53523100  | -1.07814300 | 2.26155700  |
| C | 4.07654300  | -2.49786700 | 1.83305500  |
| C | 4.71619700  | -3.58631500 | 2.73141600  |
| C | 3.34490600  | -2.72878300 | -0.63199200 |
| C | 4.37155100  | -2.72295700 | 0.34796400  |
| C | 5.69682100  | -2.90031400 | -0.09796700 |
| C | 5.98104700  | -3.07630300 | -1.46252000 |
| C | 4.94590900  | -3.06111900 | -2.40956600 |
| C | 3.60206300  | -2.87287500 | -2.01909700 |
| C | -4.12802700 | -2.17254600 | -2.12989700 |
| C | -3.16096300 | -3.23040000 | -1.53900900 |
| C | -3.17975900 | -4.53067500 | -2.38556800 |
| C | 2.77471000  | -1.70699300 | -4.12555400 |
| C | 2.49766900  | -2.81765600 | -3.07964300 |
| C | 2.31999800  | -4.19514100 | -3.77213000 |
| C | 2.54444300  | 3.33875300  | 0.96944500  |
| C | 3.48788000  | 3.52228200  | -0.07224100 |
| C | 4.76954500  | 3.98725100  | 0.29308800  |
| C | 5.09442800  | 4.23514100  | 1.63603700  |
| C | 4.14623600  | 4.01460800  | 2.64843600  |
| C | 2.84907400  | 3.55722500  | 2.33705900  |
| C | 4.12744200  | 2.17179100  | -2.12999800 |
| C | 3.16084100  | 3.23017600  | -1.53932300 |
| C | 3.18018800  | 4.53027100  | -2.38614700 |
| C | -4.53492700 | 1.07798300  | 2.26136200  |
| C | -4.07627000 | 2.49777800  | 1.83307000  |
| C | -4.71562100 | 3.58609200  | 2.73181500  |
| C | -3.34497200 | 2.72897800  | -0.63200400 |
| C | -4.37149500 | 2.72314700  | 0.34805700  |
| C | -5.69682900 | 2.90034100  | -0.09776200 |
| C | -5.98120100 | 3.07628900  | -1.46228800 |
| C | -4.94616400 | 3.06114000  | -2.40944500 |
| C | -3.60227500 | 2.87296900  | -2.01910300 |
| C | 2.26922700  | 2.00404700  | 4.24918700  |
| C | 1.84183400  | 3.26658000  | 3.45299200  |
| C | 1.64324100  | 4.47922400  | 4.39696400  |
| C | -2.77540000 | 1.70654100  | -4.12541700 |
| C | -2.49804900 | 2.81743800  | -3.07982100 |
| C | -2.32036900 | 4.19472500  | -3.77268000 |
| H | -0.55718800 | -4.78065000 | 0.35777900  |
| H | 1.62386100  | -4.54610600 | -0.29153000 |
| H | 0.55728700  | 4.78073700  | 0.35755000  |
| H | -1.62381900 | 4.54633000  | -0.29159200 |
| H | -4.41667400 | -4.19462200 | 3.68612800  |
| H | -6.08893100 | -4.59093400 | 1.89577500  |
| H | -5.51808200 | -4.14729400 | -0.47785200 |
| H | -0.87204100 | -3.04209300 | 2.99475800  |
| H | 2.99179600  | -2.53998100 | 1.97998000  |

|   |             |             |             |
|---|-------------|-------------|-------------|
| H | -3.23598700 | -2.15678300 | 4.74630000  |
| H | -2.35818000 | -1.13792100 | 3.58243100  |
| H | -1.52274700 | -1.77004200 | 5.02047900  |
| H | -2.56591800 | -4.72841300 | 4.93724600  |
| H | -0.87334500 | -4.25074000 | 5.14674100  |
| H | -1.32614100 | -5.37086300 | 3.84256700  |
| H | 5.61882400  | -0.95542200 | 2.12911400  |
| H | 4.30113300  | -0.90606800 | 3.32092600  |
| H | 4.02387400  | -0.31385300 | 1.66644100  |
| H | 4.39407800  | -4.59282000 | 2.43413500  |
| H | 4.42342600  | -3.42863600 | 3.77796100  |
| H | 5.81278700  | -3.55730100 | 2.68849400  |
| H | 6.50943300  | -2.90181200 | 0.62383900  |
| H | 7.00962600  | -3.21612500 | -1.78738900 |
| H | 5.18202400  | -3.18065300 | -3.46358000 |
| H | -2.15698200 | -2.80105900 | -1.60846500 |
| H | 1.54879800  | -2.56111400 | -2.59809600 |
| H | -5.16487200 | -2.53539000 | -2.15626800 |
| H | -3.82530600 | -1.92946100 | -3.15589400 |
| H | -4.09982100 | -1.24713800 | -1.54311600 |
| H | -4.17618300 | -4.99332000 | -2.39057900 |
| H | -2.46685100 | -5.27157500 | -1.99971700 |
| H | -2.90584400 | -4.30489800 | -3.42409000 |
| H | 2.86549000  | -0.72910300 | -3.64049400 |
| H | 1.93622500  | -1.64568700 | -4.82914300 |
| H | 3.69163700  | -1.90559900 | -4.69766800 |
| H | 3.23252400  | -4.49631500 | -4.30429200 |
| H | 1.50317600  | -4.14450800 | -4.50344300 |
| H | 2.07875000  | -4.98415900 | -3.04709700 |
| H | 5.51805900  | 4.14717700  | -0.47840700 |
| H | 6.08904200  | 4.59110000  | 1.89512800  |
| H | 4.41687300  | 4.19504600  | 3.68562500  |
| H | 2.15666600  | 2.80127400  | -1.60866000 |
| H | -2.99148200 | 2.53982000  | 1.97977100  |
| H | 5.16444700  | 2.53418200  | -2.15639400 |
| H | 3.82464900  | 1.92866100  | -3.15596200 |
| H | 4.09880300  | 1.24649700  | -1.54306000 |
| H | 2.46761200  | 5.27156800  | -2.00044300 |
| H | 2.90615900  | 4.30439700  | -3.42461800 |
| H | 4.17681300  | 4.99247900  | -2.39127800 |
| H | -5.61857300 | 0.95539500  | 2.12923100  |
| H | -4.30051100 | 0.90560700  | 3.32061400  |
| H | -4.02383300 | 0.31379400  | 1.66588600  |
| H | -4.39365800 | 4.59264300  | 2.43452000  |
| H | -4.42241500 | 3.42829900  | 3.77822000  |
| H | -5.81222300 | 3.55703800  | 2.68936800  |
| H | -6.50938800 | 2.90170900  | 0.62409400  |
| H | -7.00982900 | 3.21597900  | -1.78706100 |
| H | -5.18240900 | 3.18055000  | -3.46344500 |
| H | 0.87227100  | 3.04224400  | 2.99467000  |
| H | -1.54911400 | 2.56090000  | -2.59840100 |
| H | 3.23642300  | 2.15788000  | 4.74643100  |



|    |             |             |             |
|----|-------------|-------------|-------------|
| H  | 2.35873400  | 1.13847900  | 3.58295200  |
| H  | 1.52325900  | 1.77098300  | 5.02080700  |
| H  | 0.87367300  | 4.25156700  | 5.14635800  |
| H  | 1.32590400  | 5.37131100  | 3.84165900  |
| H  | 2.56608300  | 4.72960100  | 4.93631900  |
| H  | -2.86600400 | 0.72874900  | -3.64012700 |
| H  | -1.93714800 | 1.64511600  | -4.82927100 |
| H  | -3.69252400 | 1.90502600  | -4.69725200 |
| H  | -2.07887300 | 4.98390000  | -3.04789900 |
| H  | -3.23296300 | 4.49588700  | -4.30472900 |
| H  | -1.50371400 | 4.14380800  | -4.50416200 |
| O  | -0.00007700 | -0.00020300 | -3.08345700 |
| O  | -0.59941300 | -0.99583300 | -2.11203500 |
| O  | 1.05714900  | 1.51682600  | 0.62917100  |
| O  | -1.05711700 | -1.51675800 | 0.62930800  |
| Zr | -0.00005400 | 0.00001300  | -0.36044500 |

## 9.5 Structures with eight oxygen atoms

## Bisperoxo Complex (spiro conformation 1 lower energy)

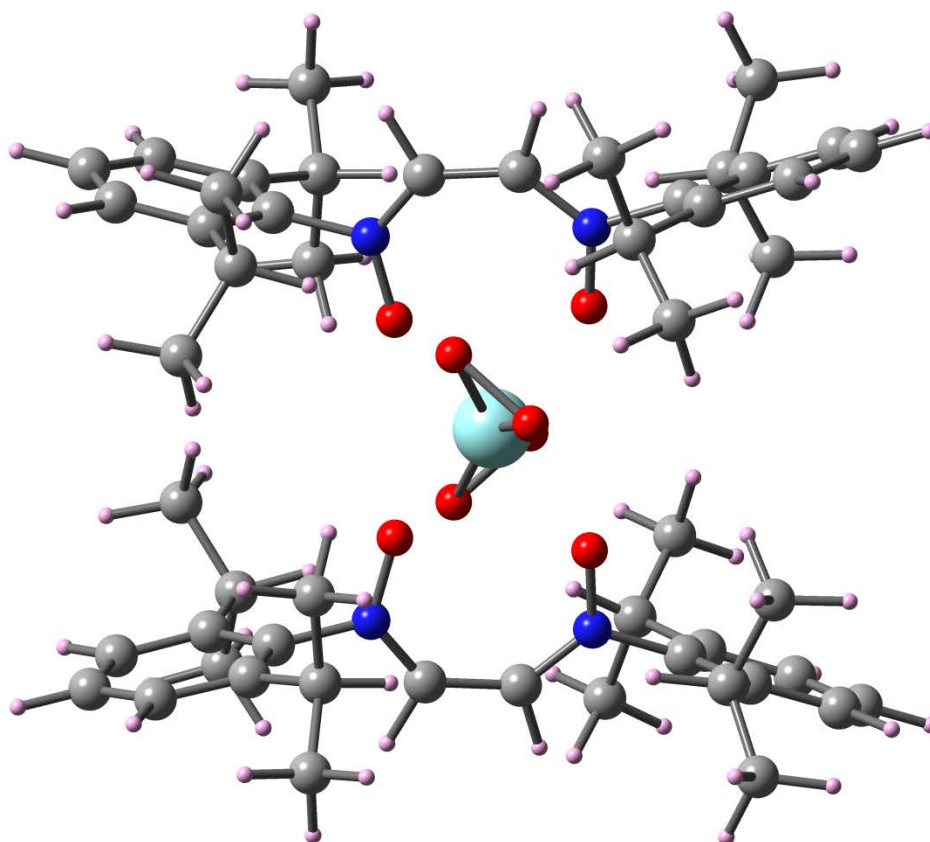

Fig. S117: ONCCNO Bisperoxo Complex (spiro conformation 1 lower energy)

| SCF          | $E_{ZP}$     | H            | G            |
|--------------|--------------|--------------|--------------|
| -2891.748604 | -2890.585775 | -2890.512054 | -2890.700079 |

|    |             |             |             |
|----|-------------|-------------|-------------|
| Zr | 0.16992393  | 0.00025500  | 0.00079131  |
| O  | 1.56829367  | -1.75966083 | 0.24401889  |
| O  | -1.25141065 | 1.57064065  | -0.80326077 |
| O  | -0.39323615 | -1.06186394 | -1.73462631 |
| O  | 0.70935252  | -0.06631954 | -2.04100788 |
| N  | 1.59966246  | 2.89873723  | 0.46864678  |
| N  | -1.59637651 | 2.76395029  | -0.30718657 |
| N  | -1.58758977 | -2.76850635 | 0.30768113  |
| N  | 1.60883571  | -2.89350844 | -0.46922517 |
| C  | 0.56046668  | 3.70556830  | 0.68617001  |
| C  | -0.81776940 | 3.65241402  | 0.32227952  |
| C  | -0.80698308 | -3.65373329 | -0.32356332 |
| C  | 0.57170904  | -3.70305058 | -0.68657683 |
| C  | 2.93715939  | 3.28583760  | 0.94120702  |
| C  | 3.22302044  | 3.20822815  | 2.32662271  |

|   |             |             |             |
|---|-------------|-------------|-------------|
| C | 4.52252576  | 3.59389119  | 2.72468694  |
| C | 5.48066390  | 4.00420324  | 1.78637821  |
| C | 5.16520009  | 4.03952681  | 0.41795493  |
| C | 3.88171752  | 3.68108040  | -0.04058604 |
| C | 2.78749940  | 1.55823747  | 4.21647398  |
| C | 2.21397783  | 2.72764581  | 3.37684835  |
| C | 1.77591165  | 3.90033417  | 4.29522782  |
| C | -4.33566331 | 1.04890911  | 2.17002853  |
| C | -3.54279542 | 2.34597280  | 1.86527318  |
| C | -3.74930182 | 3.39437042  | 2.99025039  |
| C | -3.00547063 | 3.11415392  | -0.55220325 |
| C | -3.93307595 | 2.91916090  | 0.49768733  |
| C | -5.27579876 | 3.26320454  | 0.22597041  |
| C | -5.65914760 | 3.74591358  | -1.03452853 |
| C | -4.71081410 | 3.89000694  | -2.06178243 |
| C | -3.35391766 | 3.57328540  | -1.84615562 |
| C | 4.22447923  | 2.47961562  | -2.24012356 |
| C | 3.56413697  | 3.69797516  | -1.53959990 |
| C | 3.98437095  | 5.02714704  | -2.21598715 |
| C | -2.42022293 | 2.40427272  | -3.88612390 |
| C | -2.33100224 | 3.66625843  | -2.98273297 |
| C | -2.47856129 | 4.96218184  | -3.81686727 |
| C | -2.99620704 | -3.12167510 | 0.55130246  |
| C | -3.92354015 | -2.92961355 | -0.49947170 |
| C | -5.26562815 | -3.27665783 | -0.22844737 |
| C | -5.64883235 | -3.75952905 | 1.03201453  |
| C | -4.70093570 | -3.90078335 | 2.06005201  |
| C | -3.34465815 | -3.58091242 | 1.84528137  |
| C | -4.33314121 | -1.06544296 | -2.17776196 |
| C | -3.53370315 | -2.35711139 | -1.86745573 |
| C | -3.73208322 | -3.40941150 | -2.99036673 |
| C | 4.22845811  | -2.47230051 | 2.24208603  |
| C | 3.57208027  | -3.69197901 | 1.54009334  |
| C | 3.99474466  | -5.02042132 | 2.21636280  |
| C | 2.94746727  | -3.27818120 | -0.94080553 |
| C | 3.89145554  | -3.67329081 | 0.04148777  |
| C | 5.17610721  | -4.02880451 | -0.41613587 |
| C | 5.49311486  | -3.99040277 | -1.78412939 |
| C | 4.53541080  | -3.58006259 | -2.72292151 |
| C | 3.23472070  | -3.19760705 | -2.32571789 |
| C | -2.41668279 | -2.40997715 | 3.88673135  |
| C | -2.32243390 | -3.67115722 | 2.98269224  |
| C | -2.46648714 | -4.96797233 | 3.81598578  |
| C | 2.79805558  | -1.54629601 | -4.21431741 |
| C | 2.22565292  | -2.71704369 | -3.37587804 |
| C | 1.78919477  | -3.88937984 | -4.29548874 |
| H | 0.82908851  | 4.60078539  | 1.23515210  |
| H | -1.36986260 | 4.53831839  | 0.61595989  |
| H | -1.35677918 | -4.54027810 | -0.61954854 |
| H | 0.84297953  | -4.59765334 | -1.23527595 |
| H | 4.78584391  | 3.55470950  | 3.77789760  |
| H | 6.47624966  | 4.28889214  | 2.11892564  |

|   |             |             |             |
|---|-------------|-------------|-------------|
| H | 5.92047761  | 4.34959720  | -0.29873470 |
| H | 1.32721196  | 2.32547382  | 2.87916768  |
| H | -2.48495132 | 2.06243014  | 1.86266189  |
| H | 3.67121755  | 1.85680846  | 4.79804916  |
| H | 3.05056239  | 0.71673362  | 3.56752702  |
| H | 2.02061950  | 1.20224421  | 4.91517403  |
| H | 2.62567001  | 4.30671463  | 4.86070681  |
| H | 1.02548871  | 3.55012993  | 5.01535825  |
| H | 1.33329959  | 4.72716732  | 3.72174736  |
| H | -5.41633177 | 1.23469528  | 2.23668216  |
| H | -4.00160764 | 0.63041137  | 3.12738649  |
| H | -4.16076549 | 0.29194413  | 1.39683856  |
| H | -3.16530030 | 4.30624441  | 2.80569332  |
| H | -3.42778645 | 2.97679802  | 3.95264969  |
| H | -4.80458162 | 3.68569486  | 3.08195603  |
| H | -6.02365574 | 3.13953923  | 1.00458662  |
| H | -6.69958326 | 4.00151858  | -1.22156927 |
| H | -5.02726855 | 4.25028092  | -3.03629498 |
| H | 2.48301840  | 3.58589551  | -1.67567435 |
| H | -1.32330381 | 3.66877663  | -2.54959289 |
| H | 5.31715866  | 2.50410692  | -2.12793761 |
| H | 3.98893594  | 2.48708677  | -3.31240497 |
| H | 3.84610928  | 1.54488564  | -1.81410383 |
| H | 5.07327751  | 5.16507389  | -2.20721006 |
| H | 3.53034989  | 5.89476790  | -1.71924457 |
| H | 3.66283269  | 5.02619556  | -3.26563561 |
| H | -2.20010365 | 1.50092875  | -3.30868519 |
| H | -1.68597332 | 2.47280795  | -4.69930013 |
| H | -3.42050353 | 2.31295935  | -4.33211799 |
| H | -3.42213785 | 4.98238896  | -4.37736083 |
| H | -1.66390065 | 5.02460035  | -4.54973145 |
| H | -2.44032150 | 5.85911808  | -3.18464903 |
| H | -6.01321761 | -3.15513406 | -1.00764910 |
| H | -6.68880037 | -4.01751557 | 1.21838745  |
| H | -5.01722387 | -4.26138966 | 3.03450110  |
| H | -2.47750264 | -2.06754766 | -1.86316836 |
| H | 2.49047362  | -3.58278982 | 1.67483264  |
| H | -5.41250185 | -1.25750208 | -2.24826702 |
| H | -3.99783196 | -0.64709306 | -3.13473941 |
| H | -4.16571952 | -0.30579762 | -1.40554237 |
| H | -3.14385536 | -4.31787769 | -2.80246626 |
| H | -3.41053901 | -2.99254891 | -3.95307319 |
| H | -4.78568073 | -3.70631342 | -3.08357691 |
| H | 5.32134154  | -2.49415779 | 2.13137287  |
| H | 3.99147105  | -2.48080009 | 3.31403809  |
| H | 3.84848479  | -1.53824360 | 1.81601154  |
| H | 3.54361378  | -5.88893870 | 1.71855733  |
| H | 3.67177364  | -5.02082220 | 3.26557043  |
| H | 5.08400745  | -5.15555166 | 2.20902389  |
| H | 5.93115169  | -4.33871622 | 0.30086701  |
| H | 6.48962568  | -4.27264816 | -2.11599279 |
| H | 4.80008784  | -3.53835516 | -3.77570135 |

|   |             |             |             |
|---|-------------|-------------|-------------|
| H | -1.31433293 | -3.66999626 | 2.55051317  |
| H | 1.33822944  | -2.31639202 | -2.87811992 |
| H | -3.41747474 | -2.32253895 | 4.33234797  |
| H | -2.19956201 | -1.50562954 | 3.30973854  |
| H | -1.68251011 | -2.47623935 | 4.70016585  |
| H | -1.65254123 | -5.02787003 | 4.54985709  |
| H | -2.42424276 | -5.86448875 | 3.18341022  |
| H | -3.41070955 | -4.99183777 | 4.37524806  |
| H | 3.06220313  | -0.70570180 | -3.56458048 |
| H | 2.03025922  | -1.18935231 | -4.91149201 |
| H | 3.68108023  | -1.84388857 | -4.79747890 |
| H | 1.34669527  | -4.71689804 | -3.72293635 |
| H | 2.63975189  | -4.29471270 | -4.86051828 |
| H | 1.03905929  | -3.53923010 | -5.01593782 |
| O | -0.39320339 | 1.06062731  | 1.73706105  |
| O | 0.71461221  | 0.06991083  | 2.04080115  |
| O | 1.56132925  | 1.76572323  | -0.24631170 |
| O | -1.24399785 | -1.57640442 | 0.80809571  |

**Bisperoxo Complex (spiro conformation 2 higher energy)**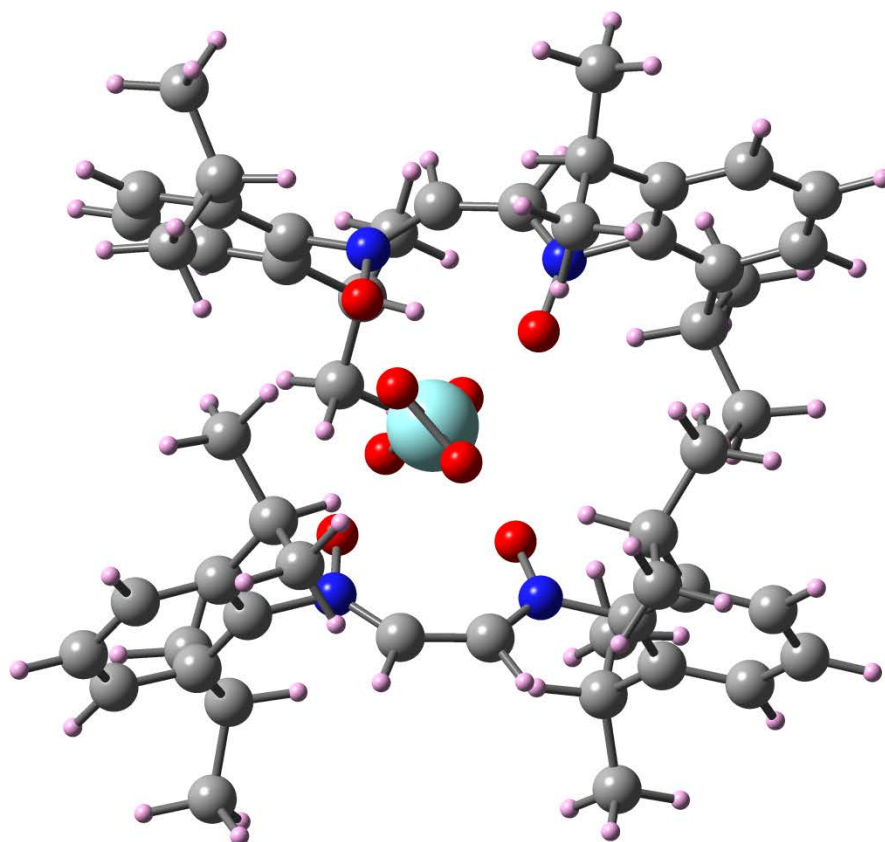

Fig. S118: ONCCNO Bisperoxo Complex (spiro conformation 2 higher energy)

| SCF          | $E_{ZP}$     | H            | G            |
|--------------|--------------|--------------|--------------|
| -2891.746730 | -2890.584397 | -2890.512396 | -2890.695242 |

|   |             |             |             |
|---|-------------|-------------|-------------|
| O | 2.23388100  | -1.03105700 | 0.20168500  |
| O | -1.76066700 | 0.85296300  | -0.58922100 |
| C | 1.39346400  | 4.16171300  | 0.91836300  |
| C | 1.48953000  | 4.30288800  | 2.32947700  |
| C | 2.57334400  | 5.06785700  | 2.81493500  |
| C | 3.51121500  | 5.64371300  | 1.94792700  |
| C | 3.38616700  | 5.47625600  | 0.55935000  |
| C | 2.32344000  | 4.73554600  | 0.00725100  |
| C | 1.25644400  | 2.77990400  | 4.35824700  |
| C | 0.51486300  | 3.67935100  | 3.33706400  |
| C | -0.30832100 | 4.78152900  | 4.05738000  |
| C | -4.52649000 | -0.64999200 | 1.94267700  |
| C | -4.33778700 | 0.85790700  | 1.63505000  |
| C | -5.07433200 | 1.73469000  | 2.68149700  |
| C | -3.92587400 | 1.70299400  | -0.77403200 |
| C | -4.79882100 | 1.18846900  | 0.21099700  |

|   |             |             |             |
|---|-------------|-------------|-------------|
| C | -6.13777600 | 0.97003800  | -0.18014500 |
| C | -6.55593400 | 1.23212200  | -1.49410300 |
| C | -5.64569600 | 1.70893700  | -2.45299800 |
| C | -4.29763000 | 1.95292100  | -2.11780000 |
| C | 3.29024000  | 3.60211800  | -2.04148200 |
| C | 2.21669300  | 4.59187600  | -1.51598700 |
| C | 2.31863000  | 5.96031900  | -2.23755600 |
| C | -2.70583300 | 1.15033900  | -3.91585300 |
| C | -3.28042200 | 2.39238700  | -3.17646000 |
| C | -3.85998700 | 3.41552300  | -4.18252800 |
| C | -1.72857900 | -3.72066000 | 0.65501900  |
| C | -2.63108600 | -3.90053400 | -0.42220000 |
| C | -3.82749500 | -4.59544700 | -0.13651200 |
| C | -4.11041100 | -5.05574900 | 1.15773400  |
| C | -3.20116100 | -4.83298700 | 2.20540900  |
| C | -1.98352600 | -4.16017500 | 1.97990200  |
| C | -3.53901100 | -2.48670400 | -2.33575700 |
| C | -2.37162400 | -3.37679600 | -1.83960200 |
| C | -2.12620700 | -4.55133500 | -2.82499500 |
| C | 4.93915600  | -1.28982300 | 2.45987900  |
| C | 4.63982100  | -2.59114800 | 1.66590500  |
| C | 5.35622600  | -3.80992200 | 2.29996000  |
| C | 4.02360300  | -2.19094500 | -0.81439900 |
| C | 5.00048800  | -2.41009600 | 0.18808600  |
| C | 6.34715400  | -2.41867600 | -0.22829400 |
| C | 6.68819800  | -2.21946400 | -1.57675200 |
| C | 5.69048900  | -1.99312500 | -2.53652300 |
| C | 4.32439100  | -1.96021300 | -2.17780200 |
| C | -1.51172100 | -2.72187100 | 4.01335400  |
| C | -1.01210400 | -3.90334700 | 3.13714300  |
| C | -0.76954400 | -5.17032500 | 3.99527900  |
| C | 3.55109000  | -0.36209200 | -4.00103600 |
| C | 3.25470900  | -1.67812700 | -3.23904800 |
| C | 3.13356700  | -2.87047000 | -4.22532400 |
| H | 2.68700700  | 5.19582400  | 3.88759500  |
| H | 4.34030000  | 6.22021100  | 2.35163900  |
| H | 4.11739600  | 5.93100800  | -0.10282100 |
| H | -0.16922200 | 3.00458200  | 2.81450800  |
| H | -3.26510800 | 1.06025300  | 1.72638900  |
| H | 2.00788000  | 3.33414800  | 4.93800400  |
| H | 1.73359200  | 1.94607100  | 3.83331800  |
| H | 0.53133900  | 2.35464900  | 5.06505900  |
| H | 0.33816800  | 5.44382000  | 4.64919400  |
| H | -1.03232200 | 4.32019500  | 4.74154700  |
| H | -0.86507300 | 5.41309500  | 3.34945600  |
| H | -5.58363200 | -0.94488900 | 1.89850300  |
| H | -4.15339100 | -0.87258800 | 2.94979600  |
| H | -3.96506300 | -1.26939400 | 1.23405500  |
| H | -4.70406100 | 1.50760900  | 3.68926200  |
| H | -6.15688000 | 1.54987200  | 2.66950300  |
| H | -4.91458100 | 2.80511000  | 2.49493300  |
| H | -6.85068300 | 0.58618600  | 0.54480000  |

|   |             |             |             |
|---|-------------|-------------|-------------|
| H | -7.59142000 | 1.05638600  | -1.77643400 |
| H | -5.98542200 | 1.88852000  | -3.46859800 |
| H | 1.24501400  | 4.15732000  | -1.76837900 |
| H | -2.43410100 | 2.87434100  | -2.67105200 |
| H | 4.30417000  | 3.96118700  | -1.81714000 |
| H | 3.19921000  | 3.48922900  | -3.12981500 |
| H | 3.15515600  | 2.61732600  | -1.58352200 |
| H | 3.30940300  | 6.41717500  | -2.11712900 |
| H | 1.57123100  | 6.67176600  | -1.86188500 |
| H | 2.14959200  | 5.82355600  | -3.31380400 |
| H | -2.17474300 | 0.48817100  | -3.22502400 |
| H | -1.99042100 | 1.47257900  | -4.68343500 |
| H | -3.51060900 | 0.58682900  | -4.40860900 |
| H | -4.62439300 | 2.96309600  | -4.82737100 |
| H | -3.05884800 | 3.78044300  | -4.83754200 |
| H | -4.30924600 | 4.27952700  | -3.67526300 |
| H | -4.54601800 | -4.76275300 | -0.93401700 |
| H | -5.04143500 | -5.58291900 | 1.35291300  |
| H | -3.43669600 | -5.18828400 | 3.20453900  |
| H | -1.48237600 | -2.73800100 | -1.84401700 |
| H | 3.56042600  | -2.76400400 | 1.74825500  |
| H | -4.47881300 | -3.04828200 | -2.42656000 |
| H | -3.29222300 | -2.07796900 | -3.32324100 |
| H | -3.70223800 | -1.64151500 | -1.65738700 |
| H | -1.27651000 | -5.17542600 | -2.51506000 |
| H | -1.90715200 | -4.15916700 | -3.82620900 |
| H | -3.00711500 | -5.20374000 | -2.89961900 |
| H | 6.00126600  | -1.01884400 | 2.38864400  |
| H | 4.68996300  | -1.42925000 | 3.52017500  |
| H | 4.33425800  | -0.46101100 | 2.07829200  |
| H | 5.16279700  | -4.73180500 | 1.73582900  |
| H | 5.00211100  | -3.95637500 | 3.32857600  |
| H | 6.44317400  | -3.66388100 | 2.34507400  |
| H | 7.13240100  | -2.58204900 | 0.50450000  |
| H | 7.73364800  | -2.23384500 | -1.87641100 |
| H | 5.97018300  | -1.82447400 | -3.57283700 |
| H | -0.04482800 | -3.59541200 | 2.72443600  |
| H | 2.28297000  | -1.53217600 | -2.75819500 |
| H | -2.50891800 | -2.93200000 | 4.42530500  |
| H | -1.55071900 | -1.79990700 | 3.42514900  |
| H | -0.82215500 | -2.56032100 | 4.85214800  |
| H | 0.00105700  | -4.96330200 | 4.74918600  |
| H | -0.43125400 | -6.01653600 | 3.38277900  |
| H | -1.67514300 | -5.48187600 | 4.53192000  |
| H | 3.61104100  | 0.48130200  | -3.30474200 |
| H | 2.72920700  | -0.15427400 | -4.69624400 |
| H | 4.48668500  | -0.41641000 | -4.57564000 |
| H | 2.87681700  | -3.80372000 | -3.70466000 |
| H | 4.07208800  | -3.03993900 | -4.77103500 |
| H | 2.34414200  | -2.66758300 | -4.96000600 |
| O | -0.39222200 | 1.04201300  | 1.81494100  |
| O | 1.03230100  | 0.58899300  | 1.89428400  |



|    |             |             |             |
|----|-------------|-------------|-------------|
| O  | 0.10286100  | -1.18264600 | -1.65764300 |
| O  | 0.68980400  | 0.17507900  | -2.06003600 |
| O  | -0.40709700 | -1.78697500 | 0.99236400  |
| O  | 0.68149400  | 2.33189500  | -0.42513600 |
| N  | 0.30574600  | 3.36086400  | 0.34968700  |
| N  | -2.52234600 | 1.92911800  | -0.39095300 |
| N  | 2.61198000  | -2.16438400 | -0.39504900 |
| N  | -0.46705600 | -3.00578000 | 0.41728600  |
| Zr | 0.27134800  | 0.12379700  | -0.00716700 |
| C  | 1.85944600  | -3.25033200 | -0.58683300 |
| H  | 2.39806900  | -4.04236000 | -1.09472500 |
| C  | 0.51810400  | -3.60881500 | -0.24828200 |
| H  | 0.24572800  | -4.60317600 | -0.58409200 |
| C  | -0.96403400 | 3.73710700  | 0.50891700  |
| H  | -1.08155200 | 4.68346200  | 1.02276300  |
| C  | -2.18391500 | 3.13327000  | 0.09532300  |
| H  | -3.04904400 | 3.77824400  | 0.20553300  |

**Bisepoxo Complex (planar conformation)**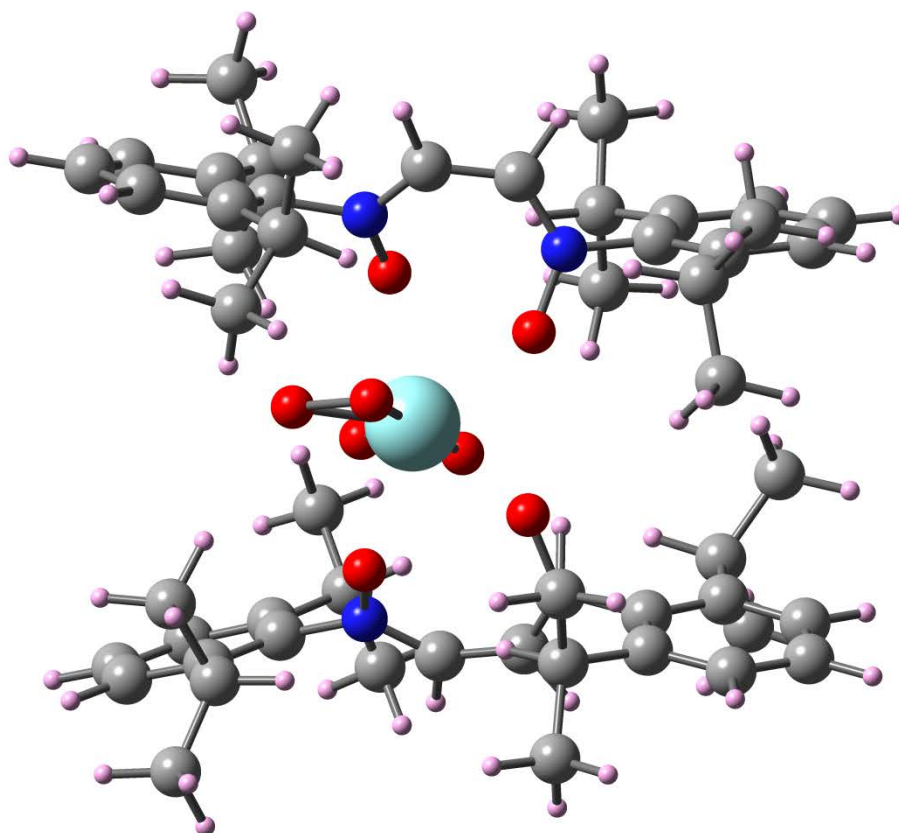

Fig. S119: ONCCNO Bisepoxo Complex (planar conformation)

| SCF            | $E_{ZP}$     | H            | G            |
|----------------|--------------|--------------|--------------|
| -2891.73752862 | -2890.575134 | -2890.501691 | -2890.687997 |

|    |             |             |             |
|----|-------------|-------------|-------------|
| Zr | -0.58801700 | 0.01899400  | -0.16971300 |
| O  | -1.64228500 | 0.50800000  | 1.55385600  |
| O  | -0.11716000 | 0.65742800  | 1.78887700  |
| O  | -0.91332300 | -0.53064800 | -2.15539100 |
| O  | -2.23744400 | -0.24718800 | -1.40146400 |
| C  | -2.58633400 | 3.49131600  | 0.75422700  |
| C  | -3.49221300 | 3.88273400  | -0.27481600 |
| C  | -4.79330000 | 4.25037800  | 0.12361200  |
| C  | -5.17141200 | 4.25366100  | 1.47356500  |
| C  | -4.24986700 | 3.87939600  | 2.46143800  |
| C  | -2.93853800 | 3.47546300  | 2.13548200  |
| C  | -3.76032100 | 2.73751100  | -2.52093600 |
| C  | -3.13651300 | 3.94346300  | -1.76700300 |
| C  | -3.56076200 | 5.28892000  | -2.41165100 |
| C  | 2.42978800  | 1.96803600  | -4.02961000 |
| C  | 2.37202900  | 3.13213900  | -3.00320200 |
| C  | 2.43772400  | 4.50850800  | -3.71427700 |
| C  | 3.21961500  | 2.60941500  | -0.61419900 |

|   |             |             |             |
|---|-------------|-------------|-------------|
| C | 3.48085600  | 2.97599300  | -1.95698700 |
| C | 4.83286700  | 3.16651000  | -2.31246300 |
| C | 5.85983000  | 2.99850100  | -1.36854700 |
| C | 5.55925600  | 2.61990700  | -0.05016600 |
| C | 4.22534800  | 2.40267200  | 0.35886000  |
| C | -2.65868800 | 1.96718800  | 4.17881800  |
| C | -2.00583700 | 3.04539700  | 3.27762000  |
| C | -1.57679800 | 4.27525900  | 4.12577800  |
| C | 4.69068600  | 0.67256900  | 2.16764200  |
| C | 3.91959500  | 1.96349900  | 1.79602000  |
| C | 4.23789800  | 3.09898400  | 2.80697400  |
| C | 2.85989300  | -2.93658000 | 0.66320700  |
| C | 2.86748100  | -3.08127700 | 2.07160800  |
| C | 4.13036700  | -3.23983400 | 2.68282000  |
| C | 5.30920300  | -3.24295100 | 1.92118500  |
| C | 5.25894800  | -3.07136400 | 0.52749600  |
| C | 4.02660400  | -2.90718900 | -0.13851700 |
| C | 1.57653500  | -1.78021300 | 3.83556600  |
| C | 1.59578700  | -3.03894800 | 2.92663500  |
| C | 1.43624100  | -4.33605300 | 3.76249800  |
| C | -2.71456900 | -2.02547500 | -4.28783400 |
| C | -2.22516200 | -3.12380100 | -3.30961300 |
| C | -1.98677300 | -4.46179300 | -4.06177700 |
| C | -2.85218200 | -3.29211800 | -0.76993700 |
| C | -3.20844100 | -3.31541400 | -2.14765800 |
| C | -4.57406500 | -3.50536800 | -2.44547900 |
| C | -5.53402200 | -3.63724600 | -1.43350200 |
| C | -5.14778600 | -3.59988600 | -0.08512100 |
| C | -3.79910100 | -3.43639700 | 0.28605800  |
| C | 4.37594300  | -1.19681700 | -1.96796600 |
| C | 3.97823400  | -2.66406400 | -1.65012400 |
| C | 4.85655300  | -3.66618800 | -2.43955200 |
| C | -3.84000700 | -2.12338200 | 2.45961300  |
| C | -3.43549600 | -3.45846300 | 1.77741100  |
| C | -4.06733900 | -4.67301600 | 2.50756700  |
| H | -5.51312000 | 4.54609000  | -0.63373800 |
| H | -6.18113300 | 4.54403500  | 1.75467200  |
| H | -4.55778800 | 3.87464600  | 3.50286400  |
| H | -2.05299900 | 3.85222300  | -1.88013500 |
| H | 1.39869900  | 3.06061900  | -2.50575000 |
| H | -4.85516300 | 2.73465300  | -2.41814100 |
| H | -3.36298000 | 1.79148700  | -2.13831100 |
| H | -3.52052800 | 2.80262500  | -3.59160000 |
| H | -4.65163500 | 5.40368800  | -2.45450100 |
| H | -3.18959200 | 5.33076500  | -3.44440300 |
| H | -3.15110200 | 6.14952600  | -1.86536500 |
| H | 3.38418900  | 1.96601600  | -4.57446200 |
| H | 1.61703900  | 2.06921000  | -4.76021900 |
| H | 2.30815900  | 1.00370000  | -3.52440600 |
| H | 2.39663400  | 5.33674000  | -2.99408100 |
| H | 1.58933700  | 4.61248600  | -4.40309600 |
| H | 3.35784300  | 4.61877900  | -4.30361900 |

|   |             |             |             |
|---|-------------|-------------|-------------|
| H | 5.08173100  | 3.44952700  | -3.33212100 |
| H | 6.89507000  | 3.15714300  | -1.66251100 |
| H | 6.36546500  | 2.48145000  | 0.66559500  |
| H | -1.11799000 | 2.56368600  | 2.86165200  |
| H | 2.85212900  | 1.72885600  | 1.87910000  |
| H | -3.57505500 | 2.32383600  | 4.66844000  |
| H | -1.95077600 | 1.67327800  | 4.96570200  |
| H | -2.87947100 | 1.08184900  | 3.57646700  |
| H | -2.44194500 | 4.73556200  | 4.62185800  |
| H | -1.09705900 | 5.05886300  | 3.52070300  |
| H | -0.86691100 | 3.96607900  | 4.90435800  |
| H | 4.46717000  | -0.13738800 | 1.46436200  |
| H | 4.39819800  | 0.33937000  | 3.17191600  |
| H | 5.77734200  | 0.83557200  | 2.17081800  |
| H | 5.30463600  | 3.36048900  | 2.78592000  |
| H | 3.98665000  | 2.77924000  | 3.82683600  |
| H | 3.66722100  | 4.01148500  | 2.58907600  |
| H | 4.18786800  | -3.35628200 | 3.76165400  |
| H | 6.27013400  | -3.36924600 | 2.41455400  |
| H | 6.18156700  | -3.06352000 | -0.04582400 |
| H | 0.72230600  | -2.95623400 | 2.27174800  |
| H | -1.27596400 | -2.74969700 | -2.91552800 |
| H | 2.46372900  | -1.73776500 | 4.48271900  |
| H | 0.68671900  | -1.80241700 | 4.47773400  |
| H | 1.51565700  | -0.86544800 | 3.23602100  |
| H | 1.43191000  | -5.23081200 | 3.12540900  |
| H | 0.48981600  | -4.30726400 | 4.31734000  |
| H | 2.24700200  | -4.44882900 | 4.49436000  |
| H | -3.63825500 | -2.31425600 | -4.80892100 |
| H | -1.94257500 | -1.84382900 | -5.04732400 |
| H | -2.87387500 | -1.09304100 | -3.74002400 |
| H | -1.59698800 | -5.25242500 | -3.40404100 |
| H | -1.26470200 | -4.31174200 | -4.87549600 |
| H | -2.91944600 | -4.83683700 | -4.50468400 |
| H | -4.88918500 | -3.51941000 | -3.48448100 |
| H | -6.58221400 | -3.76501300 | -1.69408600 |
| H | -5.90091700 | -3.70904600 | 0.68971200  |
| H | 2.94465300  | -2.79087200 | -1.99452800 |
| H | -2.34938200 | -3.54382700 | 1.88146000  |
| H | 5.39872500  | -0.98213100 | -1.62991300 |
| H | 3.69226300  | -0.49491500 | -1.47880100 |
| H | 4.33152200  | -1.02089300 | -3.05075400 |
| H | 4.72278500  | -3.50900100 | -3.51761700 |
| H | 4.59086500  | -4.70666000 | -2.20984700 |
| H | 5.92409600  | -3.53500200 | -2.21954100 |
| H | -3.27199000 | -1.28528400 | 2.04340000  |
| H | -3.62914600 | -2.17549600 | 3.53705800  |
| H | -4.91379500 | -1.92647300 | 2.33279100  |
| H | -3.81321000 | -5.62153500 | 2.01519000  |
| H | -5.16135100 | -4.60098900 | 2.55765300  |
| H | -3.69642100 | -4.71282200 | 3.54050100  |
| O | -1.17406800 | -2.15965500 | 0.52178500  |

|   |             |             |             |
|---|-------------|-------------|-------------|
| N | -1.45564200 | -3.11899000 | -0.38199700 |
| O | 1.20520500  | -1.51212500 | -0.24382900 |
| O | -1.11772200 | 2.23261900  | -0.69127500 |
| O | 1.32778200  | 1.22222300  | -0.62829000 |
| N | 1.55867200  | -2.77293200 | -0.00392400 |
| N | 1.81055300  | 2.40528800  | -0.22959700 |
| N | -1.24121500 | 3.09893000  | 0.33993700  |
| C | 1.20557400  | 3.38971300  | 0.45041500  |
| H | 1.90258100  | 4.16937400  | 0.74141300  |
| C | -0.14050700 | 3.63936300  | 0.85079700  |
| H | -0.28282600 | 4.43277100  | 1.57238700  |
| C | -0.49487700 | -3.96495100 | -0.75875700 |
| H | -0.80922000 | -4.84379800 | -1.30650000 |
| C | 0.86737900  | -3.86575000 | -0.35405800 |
| H | 1.43529100  | -4.78829100 | -0.30057700 |

**Bisperoxo Complex (butterfly conformation)**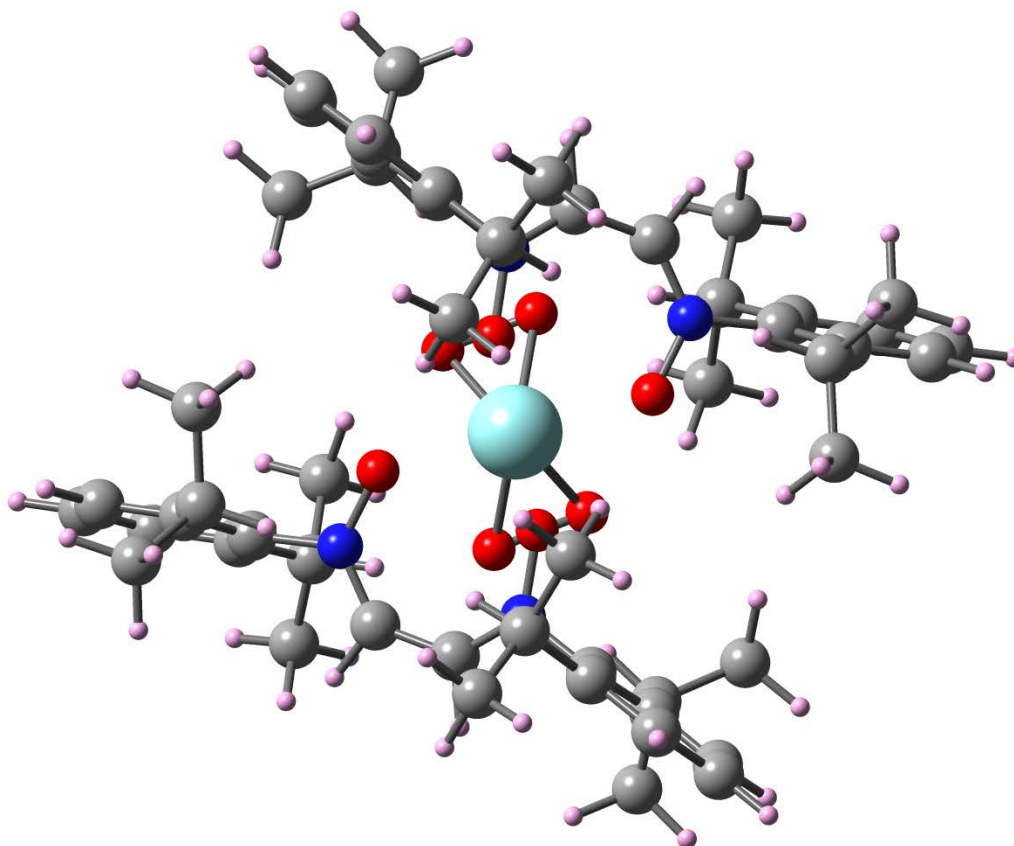

Fig. S120: ONCCNO Bisperoxo Complex (butterfly conformation)

| SCF          | $E_{ZP}$     | H            | G            |
|--------------|--------------|--------------|--------------|
| -2891.759470 | -2890.596997 | -2890.523075 | -2890.712818 |

|   |             |             |             |
|---|-------------|-------------|-------------|
| O | 0.34006475  | -1.49254076 | 0.89252217  |
| O | 2.10355225  | 0.58302413  | -0.07733657 |
| O | 1.10193530  | -1.22294366 | -2.12909069 |
| N | -0.12723569 | 2.79028429  | 0.86040473  |
| N | 2.67675706  | 1.74293972  | -0.46147593 |
| N | -2.67153045 | -1.73522334 | -0.50158753 |
| N | 0.12235991  | -2.81562147 | 0.81136393  |
| C | 0.91366939  | 3.40022475  | 0.29965834  |
| C | 2.13576057  | 2.94516369  | -0.30493171 |
| C | -2.13582630 | -2.94234399 | -0.36931078 |
| C | -0.92033182 | -3.41157619 | 0.23814509  |
| C | -1.18319513 | 3.60958565  | 1.48235141  |
| C | -2.12461051 | 4.26059132  | 0.64865611  |
| C | -3.10583772 | 5.04390102  | 1.29643581  |
| C | -3.15069620 | 5.14796217  | 2.69440336  |
| C | -2.21381557 | 4.46441585  | 3.48676338  |
| C | -1.20504531 | 3.67590012  | 2.89728405  |

|   |             |             |             |
|---|-------------|-------------|-------------|
| C | -3.48466370 | 3.61802080  | -1.40184184 |
| C | -2.12482605 | 4.14613872  | -0.87925643 |
| C | -1.77348947 | 5.50765786  | -1.53671829 |
| C | 2.95667269  | 0.76256642  | -4.37164848 |
| C | 3.12923194  | 1.98022258  | -3.42376659 |
| C | 3.39363295  | 3.28141742  | -4.22603962 |
| C | 4.03704744  | 1.60548699  | -1.01007987 |
| C | 4.24447012  | 1.71995806  | -2.40671712 |
| C | 5.57240640  | 1.55122426  | -2.86093201 |
| C | 6.62017037  | 1.27129952  | -1.97311880 |
| C | 6.36859935  | 1.14633251  | -0.59654896 |
| C | 5.06754297  | 1.30694115  | -0.08135331 |
| C | -0.93200958 | 1.74304477  | 4.50278198  |
| C | -0.21266350 | 2.91160345  | 3.77826289  |
| C | 0.50618522  | 3.84024294  | 4.78939083  |
| C | 4.87947473  | -0.38371602 | 1.78993364  |
| C | 4.80632784  | 1.12161433  | 1.41737667  |
| C | 5.77214706  | 1.96196476  | 2.29040313  |
| C | -4.02499758 | -1.57562089 | -1.06015283 |
| C | -4.22405244 | -1.67275781 | -2.45955699 |
| C | -5.54656038 | -1.48295906 | -2.92121209 |
| C | -6.59738956 | -1.19991351 | -2.03815483 |
| C | -6.35427992 | -1.09299728 | -0.65863881 |
| C | -5.05913079 | -1.27506011 | -0.13577119 |
| C | -2.91655770 | -0.70980762 | -4.40865085 |
| C | -3.10579251 | -1.93438195 | -3.47291578 |
| C | -3.37802334 | -3.22579696 | -4.28827906 |
| C | 0.85060959  | -1.87459831 | 4.48964803  |
| C | 0.14967572  | -3.02943835 | 3.72581207  |
| C | -0.57906743 | -3.98623555 | 4.70287056  |
| C | 1.16730631  | -3.65258657 | 1.42951182  |
| C | 1.16044556  | -3.76528519 | 2.84143363  |
| C | 2.16027099  | -4.56962974 | 3.42492606  |
| C | 3.11621225  | -5.22270693 | 2.62955945  |
| C | 3.10000847  | -5.07175259 | 1.23519904  |
| C | 2.12842485  | -4.27110322 | 0.59409273  |
| C | -4.87182173 | 0.38875300  | 1.75977634  |
| C | -4.80896608 | -1.11193619 | 1.36750643  |
| C | -5.79028037 | -1.95504333 | 2.22052601  |
| C | 3.51777810  | -3.51378783 | -1.39407107 |
| C | 2.16121046  | -4.10088589 | -0.92796360 |
| C | 1.86657277  | -5.44518410 | -1.64497442 |
| H | 0.83115615  | 4.48109845  | 0.32905783  |
| H | 2.76098530  | 3.74893813  | -0.67756784 |
| H | -2.75881698 | -3.73650252 | -0.76547859 |
| H | -0.84399435 | -4.49326683 | 0.25517306  |
| H | -3.84593967 | 5.56471984  | 0.69554217  |
| H | -3.91888807 | 5.75524148  | 3.16749379  |
| H | -2.26526095 | 4.54435777  | 4.56929610  |
| H | -1.38067382 | 3.41235385  | -1.19917632 |
| H | 2.16865995  | 2.09328909  | -2.91217926 |
| H | -4.31000379 | 4.31200751  | -1.18837920 |

|   |             |             |             |
|---|-------------|-------------|-------------|
| H | -3.71715635 | 2.64422754  | -0.95694098 |
| H | -3.42398937 | 3.47541736  | -2.48697447 |
| H | -2.51890286 | 6.27830552  | -1.29584018 |
| H | -1.74149376 | 5.39397773  | -2.62741078 |
| H | -0.79224284 | 5.87864916  | -1.20872561 |
| H | 3.88166734  | 0.53601363  | -4.92095150 |
| H | 2.16841435  | 0.98050788  | -5.10367180 |
| H | 2.64363276  | -0.12518908 | -3.81057165 |
| H | 3.50411563  | 4.15276616  | -3.56506811 |
| H | 2.55026473  | 3.47398418  | -4.90094120 |
| H | 4.30326364  | 3.20826378  | -4.83778295 |
| H | 5.77693643  | 1.63002088  | -3.92496440 |
| H | 7.63128538  | 1.14242398  | -2.35225275 |
| H | 7.18735482  | 0.92011026  | 0.08103468  |
| H | 0.55428474  | 2.45918886  | 3.14025916  |
| H | 3.78623718  | 1.45110349  | 1.64418189  |
| H | -1.72740972 | 2.11520995  | 5.16255108  |
| H | -0.21623631 | 1.17982799  | 5.11536232  |
| H | -1.37593421 | 1.05814014  | 3.77167148  |
| H | -0.19558704 | 4.27464744  | 5.51307151  |
| H | 1.01871966  | 4.66735983  | 4.28098856  |
| H | 1.25485968  | 3.27116853  | 5.35620511  |
| H | 4.13571612  | -0.95322281 | 1.22317721  |
| H | 4.67671801  | -0.52153742 | 2.86048299  |
| H | 5.87498175  | -0.79501198 | 1.57534985  |
| H | 6.81248661  | 1.62960787  | 2.18247785  |
| H | 5.50315213  | 1.85963338  | 3.35004338  |
| H | 5.73046472  | 3.02704757  | 2.02722601  |
| H | -5.74427185 | -1.54733994 | -3.98751018 |
| H | -7.60401703 | -1.05456855 | -2.42323225 |
| H | -7.17520449 | -0.86468879 | 0.01558109  |
| H | -2.14900913 | -2.06000200 | -2.95735637 |
| H | -0.61057879 | -2.56626518 | 3.08713676  |
| H | -3.83500458 | -0.47171803 | -4.96401374 |
| H | -2.12354246 | -0.92712348 | -5.13573444 |
| H | -2.60250877 | 0.17075076  | -3.83679168 |
| H | -3.49859999 | -4.10239010 | -3.63598669 |
| H | -2.53372961 | -3.41936111 | -4.96178131 |
| H | -4.28464548 | -3.13935246 | -4.90273306 |
| H | 1.63922949  | -2.25817102 | 5.15091749  |
| H | 0.12247588  | -1.33165066 | 5.10603336  |
| H | 1.30022624  | -1.16845075 | 3.78258747  |
| H | -1.07722864 | -4.80467529 | 4.16703787  |
| H | -1.34052721 | -3.43532744 | 5.27057451  |
| H | 0.11409944  | -4.43231059 | 5.42766082  |
| H | 2.19008194  | -4.68569376 | 4.50496311  |
| H | 3.87712057  | -5.84264706 | 3.09798447  |
| H | 3.85444298  | -5.56947873 | 0.63241892  |
| H | -3.79396552 | -1.45345367 | 1.59873486  |
| H | 1.40358389  | -3.37767798 | -1.24022033 |
| H | -5.86106555 | 0.81254277  | 1.54047199  |
| H | -4.11659827 | 0.95865151  | 1.20881749  |



|    |             |             |             |
|----|-------------|-------------|-------------|
| H  | -4.67924762 | 0.51003005  | 2.83424426  |
| H  | -5.52862778 | -1.87108370 | 3.28363286  |
| H  | -5.75741122 | -3.01656702 | 1.94207731  |
| H  | -6.82629586 | -1.61039475 | 2.10951273  |
| H  | 3.70828638  | -2.54949505 | -0.91018935 |
| H  | 3.48205192  | -3.33461440 | -2.47488508 |
| H  | 4.35776240  | -4.19020209 | -1.18085081 |
| H  | 0.88981239  | -5.85626518 | -1.35414173 |
| H  | 2.62932174  | -6.20269969 | -1.41716918 |
| H  | 1.85581538  | -5.28919181 | -2.73076962 |
| O  | 0.32398684  | 1.81399153  | -1.91065716 |
| O  | -1.10226844 | 1.26155875  | -2.09863974 |
| O  | -0.32150500 | -1.78280281 | -1.94145781 |
| O  | -2.09523101 | -0.59022694 | -0.07642511 |
| O  | -0.32838158 | 1.46266014  | 0.92707398  |
| Zr | 0.00169302  | 0.00592038  | -0.87355651 |

Oxo  $\eta^2$ -Ozone Complex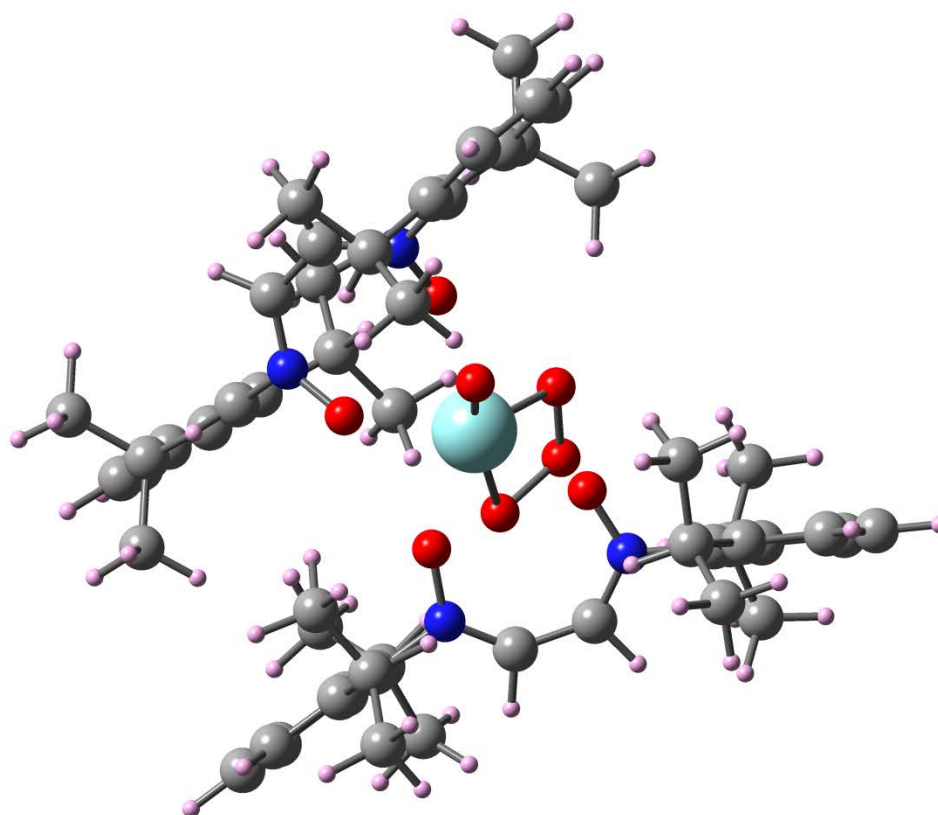Fig. S121: ONCCNO Oxo  $\eta^2$ -Ozone Complex

| SCF          | E <sub>ZP</sub> | H            | G            |
|--------------|-----------------|--------------|--------------|
| -2891.736357 | -2890.573469    | -2890.499783 | -2890.686288 |

|   |             |             |             |
|---|-------------|-------------|-------------|
| O | 2.46465654  | -0.56444541 | 0.30389399  |
| O | -1.86067275 | 0.57151686  | 0.00638743  |
| O | 0.39461468  | -1.22143547 | -1.70800310 |
| N | -0.83275332 | 3.47306155  | 0.21007174  |
| N | -2.92683231 | 1.31053890  | -0.29537655 |
| N | 0.04876377  | -2.80343640 | 0.65175602  |
| N | 3.02994130  | -1.67381867 | -0.17820233 |
| C | -2.13582895 | 3.53895181  | 0.48793845  |
| C | -3.10015443 | 2.59950544  | 0.01421303  |
| C | 1.11021242  | -3.32152956 | 0.02496918  |
| C | 2.40929325  | -2.85454587 | -0.31720258 |
| C | 0.13456185  | 4.42038498  | 0.75684605  |
| C | 0.27117476  | 4.55304349  | 2.16682155  |
| C | 1.23042828  | 5.47977117  | 2.62451243  |
| C | 2.02279746  | 6.21507513  | 1.73201110  |
| C | 1.86483665  | 6.05251749  | 0.34773401  |
| C | 0.91381043  | 5.15708494  | -0.17991924 |

|   |             |             |             |
|---|-------------|-------------|-------------|
| C | 0.40558617  | 3.02851681  | 4.20483033  |
| C | -0.52843662 | 3.75447899  | 3.20440908  |
| C | -1.54253989 | 4.67049449  | 3.94305924  |
| C | -4.92593387 | -1.52429384 | 1.84989963  |
| C | -4.96877606 | -0.07316473 | 1.30673723  |
| C | -6.17418021 | 0.70566970  | 1.89760144  |
| C | -4.00695297 | 0.59901420  | -0.99931820 |
| C | -4.99403877 | -0.05404198 | -0.22458654 |
| C | -6.03339260 | -0.69596869 | -0.92979333 |
| C | -6.06117986 | -0.69231333 | -2.33405760 |
| C | -5.04490427 | -0.05763760 | -3.06551650 |
| C | -3.98231306 | 0.60531210  | -2.41449861 |
| C | 1.96201112  | 4.31896663  | -2.33726697 |
| C | 0.75318754  | 5.05877253  | -1.70293132 |
| C | 0.55150381  | 6.45647939  | -2.34596466 |
| C | -2.05917619 | 0.19669446  | -4.02387435 |
| C | -2.86318953 | 1.26164369  | -3.22988534 |
| C | -3.42288628 | 2.35802032  | -4.17356022 |
| C | -1.09860829 | -3.65761101 | 0.96350015  |
| C | -1.89653732 | -4.16804449 | -0.09311600 |
| C | -2.97477015 | -5.00624334 | 0.26857643  |
| C | -3.25346930 | -5.29877118 | 1.61137739  |
| C | -2.45251117 | -4.76164236 | 2.63234963  |
| C | -1.35143548 | -3.93415468 | 2.33349844  |
| C | -2.91714665 | -3.30029759 | -2.25913318 |
| C | -1.64525988 | -3.86057538 | -1.57501167 |
| C | -1.14708812 | -5.12578670 | -2.32605516 |
| C | 4.70497230  | 0.27085388  | 2.56187881  |
| C | 4.76378017  | -1.21672433 | 2.11943248  |
| C | 5.58069014  | -2.06789817 | 3.12424622  |
| C | 4.47167735  | -1.55485575 | -0.43816460 |
| C | 5.30568705  | -1.32782260 | 0.68971437  |
| C | 6.68615867  | -1.18353829 | 0.44706567  |
| C | 7.20732978  | -1.26861925 | -0.85432961 |
| C | 6.35333999  | -1.49218814 | -1.94280992 |
| C | 4.95853646  | -1.63164178 | -1.76640157 |
| C | -1.25247959 | -2.23496609 | 4.20737103  |
| C | -0.49045885 | -3.36644014 | 3.46692050  |
| C | -0.02472742 | -4.46548956 | 4.45537019  |
| C | 4.17625878  | -0.60387306 | -3.94957821 |
| C | 4.06593305  | -1.82252904 | -2.99693818 |
| C | 4.40177206  | -3.14397334 | -3.73696125 |
| H | -2.48152854 | 4.41623321  | 1.01924128  |
| H | -4.11603842 | 2.95519855  | -0.11839856 |
| H | 0.96280391  | -4.36531012 | -0.23013775 |
| H | 3.04762591  | -3.61791777 | -0.74701271 |
| H | 1.37499307  | 5.60531065  | 3.69344811  |
| H | 2.76535957  | 6.91129464  | 2.11477323  |
| H | 2.48117698  | 6.63240140  | -0.33281290 |
| H | -1.07849305 | 2.95938791  | 2.69372575  |
| H | -4.05186016 | 0.41903945  | 1.65080520  |
| H | 1.01158810  | 3.73028710  | 4.79341121  |

|   |             |             |             |
|---|-------------|-------------|-------------|
| H | 1.05186162  | 2.34670458  | 3.64343036  |
| H | -0.19740522 | 2.43783381  | 4.90880207  |
| H | -1.02644699 | 5.46180121  | 4.50256901  |
| H | -2.12985010 | 4.08180425  | 4.66027381  |
| H | -2.24242723 | 5.16255644  | 3.25187935  |
| H | -5.82956654 | -2.08437540 | 1.57522338  |
| H | -4.85779437 | -1.51342737 | 2.94544890  |
| H | -4.05739739 | -2.06609047 | 1.46040468  |
| H | -6.19664754 | 1.74558734  | 1.54517326  |
| H | -6.11705187 | 0.71875042  | 2.99376080  |
| H | -7.12648997 | 0.23772759  | 1.61624084  |
| H | -6.81846801 | -1.20528165 | -0.37748115 |
| H | -6.87097345 | -1.19365700 | -2.85882422 |
| H | -5.07028261 | -0.07999741 | -4.15144594 |
| H | -0.13283641 | 4.45989676  | -1.93424991 |
| H | -2.15211792 | 1.74292315  | -2.55006177 |
| H | 2.90755254  | 4.81991343  | -2.08689619 |
| H | 1.86122242  | 4.31065358  | -3.43122103 |
| H | 2.00631284  | 3.27936266  | -1.99859087 |
| H | 1.44636175  | 7.08490542  | -2.25284247 |
| H | -0.28913962 | 6.99646572  | -1.88942114 |
| H | 0.34287812  | 6.34122554  | -3.41775286 |
| H | -1.57361108 | -0.51637405 | -3.34928863 |
| H | -1.26603403 | 0.68787681  | -4.60053715 |
| H | -2.70571659 | -0.35086166 | -4.72394901 |
| H | -4.09702711 | 1.93521528  | -4.93036676 |
| H | -2.59607417 | 2.84912662  | -4.70200874 |
| H | -3.97899842 | 3.12632152  | -3.61919131 |
| H | -3.60653107 | -5.42208810 | -0.51135727 |
| H | -4.09327488 | -5.94243449 | 1.86295818  |
| H | -2.67721777 | -4.99526227 | 3.66938724  |
| H | -0.87728472 | -3.08533069 | -1.66867173 |
| H | 3.73322093  | -1.58727006 | 2.13839108  |
| H | -3.73190894 | -4.03660956 | -2.28162023 |
| H | -2.68607079 | -3.02298626 | -3.29503650 |
| H | -3.27783917 | -2.40394995 | -1.74357479 |
| H | -0.22662287 | -5.53236060 | -1.88528804 |
| H | -0.93635776 | -4.88008587 | -3.37472646 |
| H | -1.90220865 | -5.92358356 | -2.30832564 |
| H | 5.70244584  | 0.73131752  | 2.52901217  |
| H | 4.32754615  | 0.34271534  | 3.59058563  |
| H | 4.02724973  | 0.83524194  | 1.91440635  |
| H | 5.64393365  | -3.11781451 | 2.80847145  |
| H | 5.10046069  | -2.03482558 | 4.11100107  |
| H | 6.60372047  | -1.68930347 | 3.24667204  |
| H | 7.35754765  | -1.00688498 | 1.28250582  |
| H | 8.27650421  | -1.15538001 | -1.01823635 |
| H | 6.76583895  | -1.54304373 | -2.94671630 |
| H | 0.40369720  | -2.90680532 | 3.03470286  |
| H | 3.01958268  | -1.85896611 | -2.68593106 |
| H | -2.17830986 | -2.61272753 | 4.66376339  |
| H | -1.50154414 | -1.42911200 | 3.50930556  |

|    |             |             |             |
|----|-------------|-------------|-------------|
| H  | -0.62456379 | -1.81537183 | 5.00410723  |
| H  | 0.64808088  | -4.02847768 | 5.20488934  |
| H  | 0.51604734  | -5.26898196 | 3.93828605  |
| H  | -0.86691855 | -4.91845585 | 4.99449963  |
| H  | 3.86437267  | 0.31119488  | -3.43507853 |
| H  | 3.50859589  | -0.74522453 | -4.80890136 |
| H  | 5.19915985  | -0.47002199 | -4.32766605 |
| H  | 4.29785601  | -4.01798999 | -3.07848825 |
| H  | 5.42937609  | -3.14146030 | -4.12455635 |
| H  | 3.72237058  | -3.27766010 | -4.58867049 |
| O  | 0.86143507  | 1.37339376  | 1.57112130  |
| O  | 1.24865071  | -0.35594304 | -2.53003857 |
| O  | 1.37061040  | 0.93174139  | -1.79376637 |
| O  | -0.05111567 | -1.52230997 | 1.10581837  |
| O  | -0.39101104 | 2.56877906  | -0.67288326 |
| Zr | 0.43913559  | 0.38970684  | 0.08699361  |

Oxo  $\eta^3$ -Ozone Complex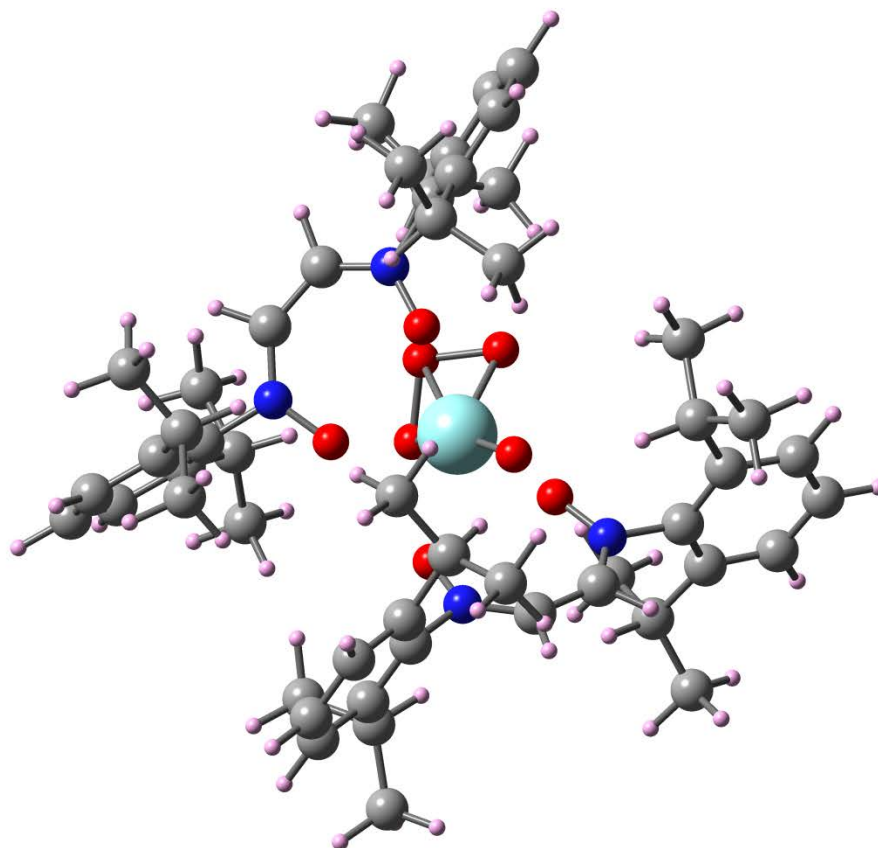Fig. S122: ONCCNO Oxo  $\eta^3$ -Ozone Complex

| SCF          | E <sub>ZP</sub> | H            | G            |
|--------------|-----------------|--------------|--------------|
| -2891.730615 | -2890.567393    | -2890.493900 | -2890.679936 |

|   |             |             |             |
|---|-------------|-------------|-------------|
| O | -1.87336349 | -0.05745758 | -0.23512442 |
| O | 2.45879356  | -0.79145552 | -0.81325733 |
| O | 1.39362536  | 1.78550969  | -1.27965279 |
| N | 0.48308242  | -2.82061211 | 0.92233513  |
| N | 3.28936996  | -1.45448948 | -0.01315535 |
| N | -1.06581102 | 3.15615618  | 0.09896784  |
| N | -2.85169558 | 0.62659888  | -0.83080683 |
| C | 1.72692019  | -2.89712791 | 1.37685403  |
| C | 2.96627503  | -2.32613642 | 0.94025346  |
| C | -2.14537012 | 3.07232069  | -0.67271692 |
| C | -2.94908082 | 1.94570176  | -1.03171562 |
| C | -0.58371080 | -3.57677364 | 1.59610476  |
| C | -1.01754192 | -3.16046144 | 2.87990737  |
| C | -2.04225092 | -3.92630403 | 3.47953476  |
| C | -2.61098651 | -5.02723418 | 2.82227270  |
| C | -2.16726561 | -5.39475086 | 1.54125755  |
| C | -1.13958236 | -4.67753936 | 0.89627750  |

|   |             |             |             |
|---|-------------|-------------|-------------|
| C | -1.56273807 | -0.94012577 | 3.99856049  |
| C | -0.44457539 | -1.94382471 | 3.61789272  |
| C | 0.34561627  | -2.38338309 | 4.87882784  |
| C | 4.24024637  | 2.18958257  | 0.93974870  |
| C | 4.44853499  | 0.76095471  | 1.51365226  |
| C | 5.10099552  | 0.81359195  | 2.91762521  |
| C | 4.71215553  | -1.13109123 | -0.22970683 |
| C | 5.27035904  | -0.07825539 | 0.53000263  |
| C | 6.63162584  | 0.21562484  | 0.29443209  |
| C | 7.37058393  | -0.49413440 | -0.66433532 |
| C | 6.76348708  | -1.50599291 | -1.42784550 |
| C | 5.40889079  | -1.84537182 | -1.23382400 |
| C | -1.76899890 | -4.70400200 | -1.55095464 |
| C | -0.68323629 | -5.08152100 | -0.50882136 |
| C | -0.31821285 | -6.58489325 | -0.59639645 |
| C | 4.23982946  | -2.16927328 | -3.44502164 |
| C | 4.71041398  | -2.86685741 | -2.13673848 |
| C | 5.58466665  | -4.10496704 | -2.44683809 |
| C | -0.40975596 | 4.44633780  | 0.34840515  |
| C | 0.13335449  | 5.18556303  | -0.73687390 |
| C | 0.76744346  | 6.40579379  | -0.41498777 |
| C | 0.87113165  | 6.85144131  | 0.90896026  |
| C | 0.33061765  | 6.08780446  | 1.95554905  |
| C | -0.32822449 | 4.86839655  | 1.70544805  |
| C | 1.51910314  | 4.67782196  | -2.81530388 |
| C | 0.09504471  | 4.74677046  | -2.20717828 |
| C | -0.82077626 | 5.68800602  | -3.03674269 |
| C | -5.04261564 | -1.20785291 | 2.11427340  |
| C | -4.94548347 | -0.02097806 | 1.12134032  |
| C | -6.05756383 | 1.02491986  | 1.40158958  |
| C | -3.98809151 | -0.21210336 | -1.27917052 |
| C | -4.99727282 | -0.50476383 | -0.33152539 |
| C | -6.09086723 | -1.27354116 | -0.78197574 |
| C | -6.15418472 | -1.73077610 | -2.10788577 |
| C | -5.11873532 | -1.43919429 | -3.00952748 |
| C | -3.99750832 | -0.67594711 | -2.61642898 |
| C | 0.20975294  | 3.33713610  | 3.65408209  |
| C | -0.91616867 | 4.07675494  | 2.88125182  |
| C | -1.74941064 | 4.97490606  | 3.83147133  |
| C | -2.40776751 | -1.61916171 | -4.38049406 |
| C | -2.87838246 | -0.35999004 | -3.61205383 |
| C | -3.32433527 | 0.74508765  | -4.60759578 |
| H | 1.83096558  | -3.55122081 | 2.23546435  |
| H | 3.82871148  | -2.68285077 | 1.49251130  |
| H | -2.49138568 | 4.01899172  | -1.06843526 |
| H | -3.84400745 | 2.21062578  | -1.58255670 |
| H | -2.40301027 | -3.64590702 | 4.46546793  |
| H | -3.40228483 | -5.59633977 | 3.30483061  |
| H | -2.61982901 | -6.24597559 | 1.04013655  |
| H | 0.23544498  | -1.38988391 | 2.95907788  |
| H | 3.44733234  | 0.32950696  | 1.62976401  |
| H | -2.28431298 | -1.36677096 | 4.70972082  |

|   |             |             |             |
|---|-------------|-------------|-------------|
| H | -2.10600913 | -0.61189012 | 3.10491147  |
| H | -1.11220034 | -0.05230664 | 4.45977369  |
| H | -0.29967507 | -2.89866419 | 5.60400315  |
| H | 0.77759327  | -1.50367552 | 5.37285721  |
| H | 1.17013018  | -3.06471567 | 4.62631237  |
| H | 5.19896481  | 2.70523294  | 0.78620190  |
| H | 3.63780839  | 2.78357140  | 1.63881193  |
| H | 3.70523230  | 2.15479867  | -0.01656448 |
| H | 5.24956729  | -0.19260246 | 3.33296086  |
| H | 4.45052820  | 1.37041290  | 3.60399163  |
| H | 6.07673418  | 1.31831486  | 2.89946325  |
| H | 7.10730994  | 1.01330750  | 0.85831643  |
| H | 8.41716825  | -0.24895322 | -0.83009832 |
| H | 7.34340152  | -2.02723448 | -2.18374720 |
| H | 0.21196433  | -4.50716298 | -0.76931385 |
| H | 3.80650268  | -3.22522723 | -1.62768160 |
| H | -2.70603944 | -5.24584638 | -1.36297090 |
| H | -1.42635538 | -4.95556415 | -2.56340149 |
| H | -1.97321229 | -3.62903799 | -1.51215725 |
| H | -1.18947139 | -7.22865240 | -0.41911043 |
| H | 0.45432750  | -6.85513608 | 0.13550660  |
| H | 0.06431439  | -6.81752417 | -1.59882276 |
| H | 3.55683465  | -1.34278398 | -3.22193096 |
| H | 3.71289318  | -2.88700800 | -4.08787541 |
| H | 5.09879342  | -1.77426328 | -4.00452798 |
| H | 6.45485169  | -3.84561527 | -3.06330698 |
| H | 4.99721952  | -4.84174510 | -3.00994139 |
| H | 5.94947128  | -4.58571622 | -1.52952973 |
| H | 1.20197273  | 6.99933333  | -1.21403157 |
| H | 1.37591586  | 7.78956753  | 1.12715039  |
| H | 0.41603829  | 6.44561649  | 2.97720262  |
| H | -0.29696453 | 3.73033022  | -2.27982167 |
| H | -3.97852156 | 0.46258760  | 1.30000616  |
| H | 2.03011286  | 5.64965416  | -2.79019688 |
| H | 1.45302094  | 4.35601532  | -3.86265581 |
| H | 2.11283076  | 3.93265621  | -2.27752005 |
| H | -1.84656895 | 5.72672782  | -2.64111495 |
| H | -0.87081195 | 5.33863796  | -4.07593479 |
| H | -0.43466083 | 6.71595484  | -3.04570403 |
| H | -6.00812354 | -1.72357747 | 2.03117412  |
| H | -4.94551679 | -0.84383166 | 3.14532275  |
| H | -4.24720188 | -1.93970404 | 1.93422721  |
| H | -5.97522914 | 1.89004382  | 0.73061306  |
| H | -5.98740535 | 1.38722819  | 2.43556927  |
| H | -7.05562149 | 0.58875354  | 1.26425987  |
| H | -6.89213520 | -1.51793265 | -0.08974132 |
| H | -7.00706630 | -2.32024124 | -2.43620769 |
| H | -5.17240422 | -1.81293922 | -4.02795173 |
| H | -1.58553376 | 3.30323147  | 2.49169858  |
| H | -1.99407703 | -0.00233381 | -3.07353576 |
| H | 0.95398427  | 4.04786580  | 4.03991997  |
| H | 0.70745194  | 2.61117088  | 3.00359055  |



|    |             |             |             |
|----|-------------|-------------|-------------|
| H  | -0.21682338 | 2.79526444  | 4.50952300  |
| H  | -2.23193993 | 4.35169447  | 4.59586656  |
| H  | -2.53292184 | 5.52157030  | 3.28995630  |
| H  | -1.12634123 | 5.70963746  | 4.35687766  |
| H  | -2.11067441 | -2.41249958 | -3.68549260 |
| H  | -1.52922328 | -1.36098058 | -4.98316238 |
| H  | -3.18115954 | -2.01465035 | -5.05419757 |
| H  | -3.60954084 | 1.67159682  | -4.09073085 |
| H  | -4.18382517 | 0.41920309  | -5.21027154 |
| H  | -2.49772582 | 0.98390280  | -5.28804746 |
| O  | 1.11542899  | -0.06951203 | 1.52072478  |
| O  | 0.12887740  | 1.52041781  | -2.14681443 |
| O  | 0.13106415  | 0.03466819  | -2.44468688 |
| O  | -0.56302338 | 2.11408335  | 0.77633423  |
| O  | 0.09244817  | -2.09651170 | -0.14549181 |
| Zr | 0.43917169  | 0.22158312  | -0.18974709 |

## Reactant for Ligand Cyclization Reaction

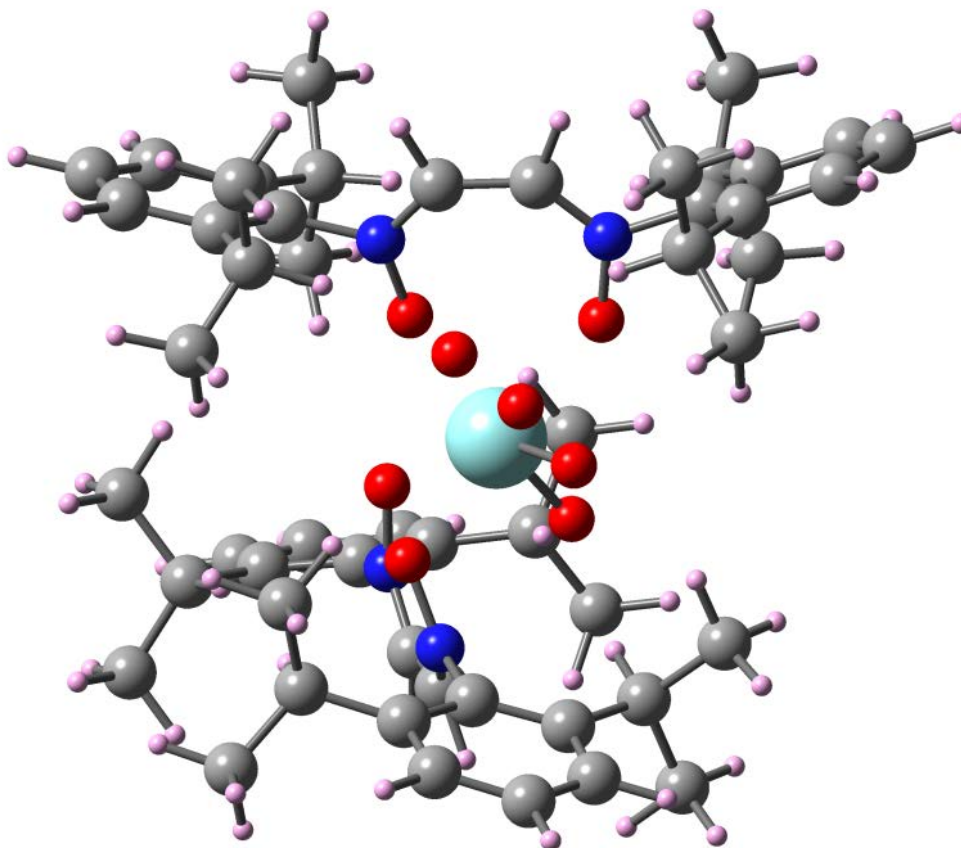

Fig. S123: ONCCNO Reactant for Ligand Cyclization Reaction

| SCF           | E <sub>ZP</sub> | H            | G            |
|---------------|-----------------|--------------|--------------|
| -2891.7463375 | -2890.582690    | -2890.509270 | -2890.695305 |

|   |             |             |             |
|---|-------------|-------------|-------------|
| O | -2.31558100 | -0.18441300 | -0.80139100 |
| O | 1.77393200  | -0.73950600 | -0.56116300 |
| O | -1.28015500 | 0.73415800  | 1.88943000  |
| N | 2.14201800  | 2.55310300  | -0.17194100 |
| N | 2.76668600  | -0.38932700 | -1.37613500 |
| N | -1.07697700 | -2.06108600 | 1.66932700  |
| N | -3.38684500 | -0.52702500 | -0.07192200 |
| C | 2.89218900  | 2.14940300  | -1.18706000 |
| C | 3.20834700  | 0.83709300  | -1.66519700 |
| C | -2.36430600 | -1.79771000 | 1.88559300  |
| C | -3.37726100 | -1.16126700 | 1.10775400  |
| C | 1.98530500  | 3.98398400  | 0.11977900  |
| C | 1.31139700  | 4.80910100  | -0.81716300 |
| C | 1.21827200  | 6.18089400  | -0.49366600 |
| C | 1.74141400  | 6.68817000  | 0.70328500  |
| C | 2.37295900  | 5.83145800  | 1.61962800  |

|   |             |             |             |
|---|-------------|-------------|-------------|
| C | 2.51060700  | 4.45582500  | 1.35134100  |
| C | -0.84527200 | 4.65596700  | -2.14827800 |
| C | 0.66411500  | 4.30065500  | -2.11169700 |
| C | 1.39863300  | 4.86259800  | -3.35820800 |
| C | 0.49618800  | -2.22870400 | -4.14345400 |
| C | 1.66835100  | -1.23080300 | -3.95551900 |
| C | 2.05528100  | -0.57420500 | -5.30621200 |
| C | 3.40494700  | -1.53068400 | -2.06155200 |
| C | 2.87252500  | -1.92555100 | -3.31074400 |
| C | 3.50173700  | -3.01745500 | -3.94721900 |
| C | 4.58573500  | -3.67927300 | -3.34865400 |
| C | 5.06387200  | -3.27157300 | -2.09247700 |
| C | 4.47793200  | -2.18339100 | -1.41227300 |
| C | 2.20443100  | 3.27584400  | 3.56075000  |
| C | 3.17961100  | 3.53999600  | 2.38152600  |
| C | 4.53058000  | 4.10525300  | 2.88741700  |
| C | 4.71283500  | -2.90151400 | 1.00924400  |
| C | 4.98198400  | -1.77578200 | -0.02433500 |
| C | 6.48358900  | -1.39021800 | -0.05065700 |
| C | -0.32114100 | -2.91797400 | 2.58798200  |
| C | 0.02287300  | -2.44021400 | 3.87779400  |
| C | 0.75542600  | -3.31755200 | 4.70878900  |
| C | 1.14053700  | -4.59089200 | 4.26738800  |
| C | 0.79597000  | -5.02457700 | 2.97649400  |
| C | 0.05347700  | -4.20116900 | 2.10713700  |
| C | 0.91371100  | -0.25719500 | 4.83379000  |
| C | -0.34678900 | -1.04655800 | 4.39697700  |
| C | -1.36361900 | -1.14143500 | 5.56622800  |
| C | -3.59543500 | -1.55536500 | -3.70776100 |
| C | -4.28375600 | -2.03090000 | -2.39952600 |
| C | -5.12664500 | -3.30793000 | -2.64102000 |
| C | -4.67204700 | -0.14203000 | -0.67462300 |
| C | -5.10894000 | -0.88952000 | -1.79768300 |
| C | -6.33509800 | -0.51468100 | -2.38204700 |
| C | -7.08389100 | 0.55558500  | -1.86509500 |
| C | -6.61248800 | 1.28102400  | -0.76188600 |
| C | -5.38479000 | 0.95926700  | -0.14089000 |
| C | 0.94926000  | -4.64008500 | -0.21903000 |
| C | -0.30039300 | -4.69529100 | 0.70015600  |
| C | -0.92234900 | -6.11453600 | 0.71489400  |
| C | -4.65724600 | 3.27880500  | 0.58458700  |
| C | -4.88423500 | 1.81059500  | 1.02934300  |
| C | -5.85743000 | 1.73726800  | 2.23537200  |
| H | 3.37621300  | 2.95276700  | -1.72954100 |
| H | 3.97944800  | 0.82893200  | -2.42766000 |
| H | -2.73425900 | -2.21434100 | 2.81605000  |
| H | -4.36829700 | -1.24502000 | 1.53991000  |
| H | 0.70898700  | 6.84959800  | -1.18160800 |
| H | 1.64779500  | 7.74787900  | 0.92906000  |
| H | 2.76324800  | 6.23492200  | 2.54952400  |
| H | 0.70131700  | 3.20674200  | -2.14905600 |
| H | 1.29345800  | -0.43700800 | -3.29826300 |

|   |             |             |             |
|---|-------------|-------------|-------------|
| H | -1.01687300 | 5.74158700  | -2.15622000 |
| H | -1.35141800 | 4.21409300  | -1.28377500 |
| H | -1.29492500 | 4.23340600  | -3.05611700 |
| H | 1.33182400  | 5.95821100  | -3.40630900 |
| H | 0.94393000  | 4.45625400  | -4.27062700 |
| H | 2.46608900  | 4.59684000  | -3.36521500 |
| H | 0.75529300  | -3.03960100 | -4.83861500 |
| H | -0.37589900 | -1.69835700 | -4.54436100 |
| H | 0.20738400  | -2.67398300 | -3.18367500 |
| H | 2.86799000  | 0.15422500  | -5.18206400 |
| H | 1.18916000  | -0.04335100 | -5.72039400 |
| H | 2.38175100  | -1.32038000 | -6.04384200 |
| H | 3.13407500  | -3.35337000 | -4.91310800 |
| H | 5.05373900  | -4.51889200 | -3.85727900 |
| H | 5.89329100  | -3.80478900 | -1.63502000 |
| H | 3.38164100  | 2.56895900  | 1.91686300  |
| H | 4.42003800  | -0.89751000 | 0.31347600  |
| H | 1.95550300  | 4.21140900  | 4.07990300  |
| H | 2.66490200  | 2.59374900  | 4.28820400  |
| H | 1.27729600  | 2.82242400  | 3.19575400  |
| H | 4.39836600  | 5.03403800  | 3.45694000  |
| H | 5.21840700  | 4.31350800  | 2.05714700  |
| H | 5.01040800  | 3.37800400  | 3.55576800  |
| H | 3.64314500  | -3.13156100 | 1.06706500  |
| H | 5.04980300  | -2.58817600 | 2.00602300  |
| H | 5.24960500  | -3.82214500 | 0.74456100  |
| H | 7.11202400  | -2.24215800 | -0.34068800 |
| H | 6.80709300  | -1.06126400 | 0.94546200  |
| H | 6.67728500  | -0.57465600 | -0.75965300 |
| H | 1.03435300  | -2.98927900 | 5.70634700  |
| H | 1.70925400  | -5.24421800 | 4.92506100  |
| H | 1.09902800  | -6.01379700 | 2.64491100  |
| H | -0.80768700 | -0.45897200 | 3.59668500  |
| H | -3.48318800 | -2.29426900 | -1.69914300 |
| H | 1.42543500  | -0.73050000 | 5.68319800  |
| H | 0.62498700  | 0.75754800  | 5.13425600  |
| H | 1.62599100  | -0.17055900 | 4.00463300  |
| H | -2.28063100 | -1.66774700 | 5.26682400  |
| H | -1.64741300 | -0.13425800 | 5.89689300  |
| H | -0.94112400 | -1.67591700 | 6.42823200  |
| H | -4.34108400 | -1.26733600 | -4.46137300 |
| H | -2.98057600 | -2.36292500 | -4.12741600 |
| H | -2.94836700 | -0.69470200 | -3.50768800 |
| H | -5.62103500 | -3.64434200 | -1.72025500 |
| H | -4.47953100 | -4.11972700 | -2.99866500 |
| H | -5.90220500 | -3.14874000 | -3.40106600 |
| H | -6.70524800 | -1.06196500 | -3.24448600 |
| H | -8.02920800 | 0.82833100  | -2.32850100 |
| H | -7.19224900 | 2.11772600  | -0.38195200 |
| H | -1.03959000 | -4.01518000 | 0.26387600  |
| H | -3.90844500 | 1.44787900  | 1.36129200  |
| H | 1.75152700  | -5.28439500 | 0.16691900  |

|    |             |             |             |
|----|-------------|-------------|-------------|
| H  | 1.32116800  | -3.61311200 | -0.29220100 |
| H  | 0.69276100  | -4.98847600 | -1.22874700 |
| H  | -1.24146900 | -6.39096100 | -0.29869700 |
| H  | -1.79854200 | -6.16494900 | 1.37464900  |
| H  | -0.20370900 | -6.87367000 | 1.04981700  |
| H  | -3.90541100 | 3.32425500  | -0.21015600 |
| H  | -4.27584600 | 3.86314700  | 1.43083300  |
| H  | -5.58566600 | 3.74768700  | 0.22989400  |
| H  | -6.00955700 | 0.70294000  | 2.57479000  |
| H  | -6.84265400 | 2.15449000  | 1.98678700  |
| H  | -5.45047400 | 2.31366200  | 3.07575900  |
| O  | 0.15036700  | 1.02959800  | -1.92025000 |
| O  | -1.65285100 | 2.13183400  | 1.63303800  |
| O  | -1.26880100 | 2.34707000  | 0.21272200  |
| O  | -0.38327600 | -1.65740100 | 0.56871700  |
| O  | 1.51873000  | 1.69502200  | 0.66490400  |
| Zr | -0.24503200 | 0.49060700  | -0.19973000 |

**Ligand Cyclization (conformation 1 lower energy)**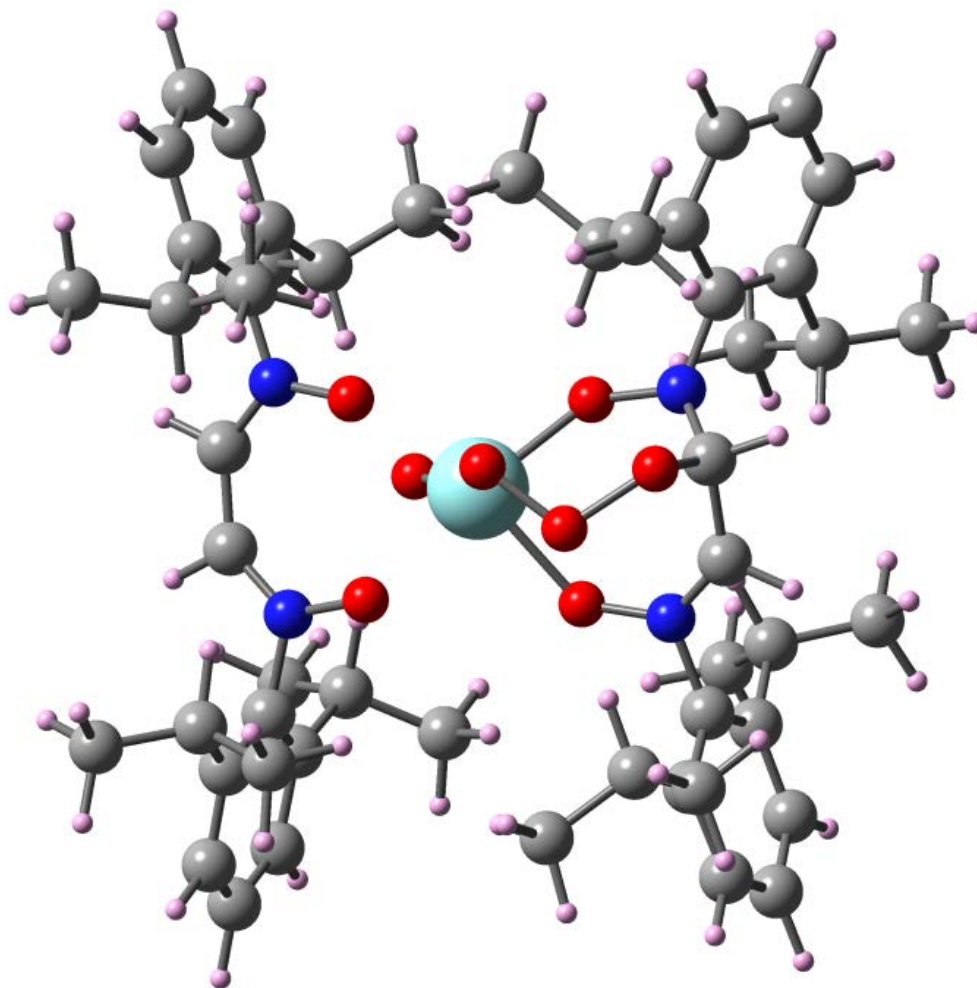

Fig. S124: ONCCNO Ligand Cyclization (conformation 1 lower energy)

| SCF           | E <sub>ZP</sub> | H            | G            |
|---------------|-----------------|--------------|--------------|
| -2891.7437044 | -2890.579968    | -2890.506771 | -2890.694187 |

|   |             |             |             |
|---|-------------|-------------|-------------|
| O | 2.02712700  | 0.03789800  | 0.04230500  |
| O | -2.43531700 | 0.47296500  | -0.40427300 |
| O | 0.91644000  | -1.96287500 | -2.83756000 |
| N | -0.67538800 | 3.17639000  | 0.41901900  |
| N | -3.23671400 | 1.10040100  | 0.46080600  |
| N | 0.66773000  | -3.04914500 | -0.56730300 |
| N | 2.95294800  | -0.74081200 | -0.57812400 |
| C | -1.83462200 | 3.13445900  | 1.06599000  |
| C | -2.94933300 | 2.22707100  | 1.10067300  |
| C | 1.51488600  | -2.64561400 | -1.62719100 |
| C | 2.76528200  | -1.84976300 | -1.25507100 |
| C | 0.20652100  | 4.34144000  | 0.60613600  |
| C | 1.03051200  | 4.37774200  | 1.75544800  |

|   |             |             |             |
|---|-------------|-------------|-------------|
| C | 1.87373500  | 5.50253300  | 1.89024300  |
| C | 1.89680700  | 6.51368100  | 0.91730900  |
| C | 1.07732600  | 6.42669700  | -0.22072500 |
| C | 0.20897200  | 5.33143500  | -0.40613500 |
| C | 2.45550600  | 2.63972600  | 2.93801100  |
| C | 1.04377200  | 3.26851500  | 2.81331200  |
| C | 0.55394800  | 3.80266500  | 4.18511800  |
| C | -3.25462500 | -2.11896000 | 2.92517100  |
| C | -3.60086700 | -0.60901200 | 2.84569800  |
| C | -3.99623700 | -0.05892600 | 4.24136500  |
| C | -4.54350300 | 0.45303400  | 0.67477900  |
| C | -4.71224000 | -0.35977900 | 1.81977600  |
| C | -5.97544900 | -0.97325400 | 1.97438100  |
| C | -6.99067200 | -0.79504000 | 1.02304100  |
| C | -6.76993800 | -0.00119900 | -0.11558200 |
| C | -5.53368800 | 0.64374200  | -0.32090900 |
| C | 0.22880900  | 4.89939100  | -2.90217200 |
| C | -0.65355500 | 5.22568300  | -1.66767500 |
| C | -1.49830100 | 6.50294400  | -1.90583100 |
| C | -4.90106300 | 0.51516500  | -2.76809800 |
| C | -5.27378500 | 1.45991700  | -1.59170000 |
| C | -6.46329200 | 2.37694700  | -1.96741400 |
| C | 0.03529400  | -4.35193400 | -0.52039400 |
| C | -1.14599500 | -4.62559600 | -1.26036900 |
| C | -1.69277100 | -5.92660300 | -1.17748100 |
| C | -1.10220800 | -6.91348500 | -0.37755000 |
| C | 0.04714000  | -6.61625000 | 0.37523200  |
| C | 0.63005200  | -5.33442700 | 0.32662900  |
| C | -3.31146200 | -3.35792400 | -1.65061200 |
| C | -1.84968100 | -3.57367300 | -2.12064000 |
| C | -1.80437200 | -3.95091700 | -3.62393600 |
| C | 4.55030800  | -0.92343900 | 3.16060800  |
| C | 4.53835800  | -1.58002100 | 1.75590500  |
| C | 5.33279400  | -2.91265500 | 1.76269200  |
| C | 4.32115000  | -0.20910700 | -0.42986300 |
| C | 5.07876900  | -0.62055700 | 0.69106500  |
| C | 6.38752500  | -0.10427200 | 0.79731500  |
| C | 6.89377200  | 0.78566700  | -0.16359200 |
| C | 6.09877500  | 1.18802700  | -1.24858600 |
| C | 4.78206700  | 0.70509000  | -1.40536100 |
| C | 1.33344000  | -4.24028100 | 2.48685700  |
| C | 1.82935200  | -4.98296500 | 1.21347500  |
| C | 2.70979800  | -6.19484100 | 1.59376500  |
| C | 3.75107700  | 2.70788000  | -2.58040000 |
| C | 3.92306600  | 1.16702200  | -2.58669600 |
| C | 4.51779800  | 0.68064900  | -3.93488300 |
| H | -1.98060600 | 4.00122500  | 1.70207900  |
| H | -3.74291300 | 2.54982000  | 1.76549700  |
| H | 1.87684600  | -3.56805200 | -2.09666600 |
| H | 3.68880500  | -2.25459200 | -1.65855400 |
| H | 2.52224600  | 5.57777200  | 2.75880000  |
| H | 2.55847900  | 7.36768600  | 1.04153100  |

|   |             |             |             |
|---|-------------|-------------|-------------|
| H | 1.11261400  | 7.21310700  | -0.96961200 |
| H | 0.37375600  | 2.45439100  | 2.51322300  |
| H | -2.67945300 | -0.10238500 | 2.53445200  |
| H | 3.20807200  | 3.37587400  | 3.25268400  |
| H | 2.77177100  | 2.20127000  | 1.98436800  |
| H | 2.43009700  | 1.83752400  | 3.68627300  |
| H | 1.21949900  | 4.58322000  | 4.57834300  |
| H | 0.52551300  | 2.98275000  | 4.91365900  |
| H | -0.45668300 | 4.22828300  | 4.11694000  |
| H | -4.10959400 | -2.72048500 | 3.26388900  |
| H | -2.42854700 | -2.26916200 | 3.63119000  |
| H | -2.92790800 | -2.49856300 | 1.95012500  |
| H | -4.21379000 | 1.01775800  | 4.20574600  |
| H | -3.17012300 | -0.21240000 | 4.94708400  |
| H | -4.88388500 | -0.56623900 | 4.64392000  |
| H | -6.15388000 | -1.60556000 | 2.83981600  |
| H | -7.95281300 | -1.28264700 | 1.16163500  |
| H | -7.56209300 | 0.11514700  | -0.84934900 |
| H | -1.34954200 | 4.38689500  | -1.55176700 |
| H | -4.40416400 | 2.10744600  | -1.42188800 |
| H | 0.96377100  | 5.69464100  | -3.08659200 |
| H | -0.39724700 | 4.79829200  | -3.79811200 |
| H | 0.76430400  | 3.95616000  | -2.75277600 |
| H | -0.86540200 | 7.37759700  | -2.10314400 |
| H | -2.13214500 | 6.73525900  | -1.03997500 |
| H | -2.14871100 | 6.36341100  | -2.77894300 |
| H | -3.98858500 | -0.04435900 | -2.53924300 |
| H | -4.72217100 | 1.10036700  | -3.67968000 |
| H | -5.71401700 | -0.19541100 | -2.97091700 |
| H | -7.34382200 | 1.79781600  | -2.27329000 |
| H | -6.18486900 | 3.01599100  | -2.81534800 |
| H | -6.75740500 | 3.02483600  | -1.13118700 |
| H | -2.58998100 | -6.16261200 | -1.74439900 |
| H | -1.53742300 | -7.90970200 | -0.33149400 |
| H | 0.48453700  | -7.38667400 | 1.00290800  |
| H | -1.33212000 | -2.61940300 | -2.01488600 |
| H | 3.49272900  | -1.81475000 | 1.52837900  |
| H | -3.92087400 | -4.26369400 | -1.77652600 |
| H | -3.77377900 | -2.55464200 | -2.23798200 |
| H | -3.34554800 | -3.06582300 | -0.59382000 |
| H | -0.76910800 | -4.02706300 | -3.97735200 |
| H | -2.30003200 | -3.17195500 | -4.21747100 |
| H | -2.30994800 | -4.90716400 | -3.82051500 |
| H | 5.57161500  | -0.69011900 | 3.48935400  |
| H | 4.10731100  | -1.60626800 | 3.89695300  |
| H | 3.96804600  | 0.00422500  | 3.16230100  |
| H | 5.29906100  | -3.40834800 | 0.78364200  |
| H | 4.91052300  | -3.60036400 | 2.50636400  |
| H | 6.38758000  | -2.74657700 | 2.01795600  |
| H | 7.01021800  | -0.39706200 | 1.63844000  |
| H | 7.90621600  | 1.16964000  | -0.06383700 |
| H | 6.50024200  | 1.88500100  | -1.97912600 |



|    |             |             |             |
|----|-------------|-------------|-------------|
| H  | 2.45726300  | -4.27334700 | 0.65905700  |
| H  | 2.92035900  | 0.73708600  | -2.49760000 |
| H  | 0.67893500  | -4.89366400 | 3.08054500  |
| H  | 0.77228800  | -3.34005000 | 2.21532600  |
| H  | 2.18468300  | -3.94855600 | 3.11921200  |
| H  | 3.61200300  | -5.84934700 | 2.11583700  |
| H  | 3.02494000  | -6.76525300 | 0.70984600  |
| H  | 2.18715100  | -6.88122700 | 2.27294800  |
| H  | 3.28881800  | 3.04707200  | -1.64597000 |
| H  | 3.10279700  | 3.01167200  | -3.41199700 |
| H  | 4.71286700  | 3.22495900  | -2.69701400 |
| H  | 4.61191100  | -0.41261500 | -3.96180300 |
| H  | 5.51247800  | 1.11056200  | -4.11429900 |
| H  | 3.86279000  | 0.98060200  | -4.76216900 |
| O  | -0.69733700 | 0.51144900  | 1.71992200  |
| O  | 0.69494500  | -0.45123600 | -2.54910800 |
| O  | -0.69454700 | -0.20365800 | -2.16666000 |
| O  | 0.00600600  | -2.03018700 | 0.18775300  |
| O  | -0.19277800 | 2.25287600  | -0.42846400 |
| Zr | -0.19860000 | 0.00688300  | 0.00890300  |

**Ligand Cyclization (conformation 2 higher energy)**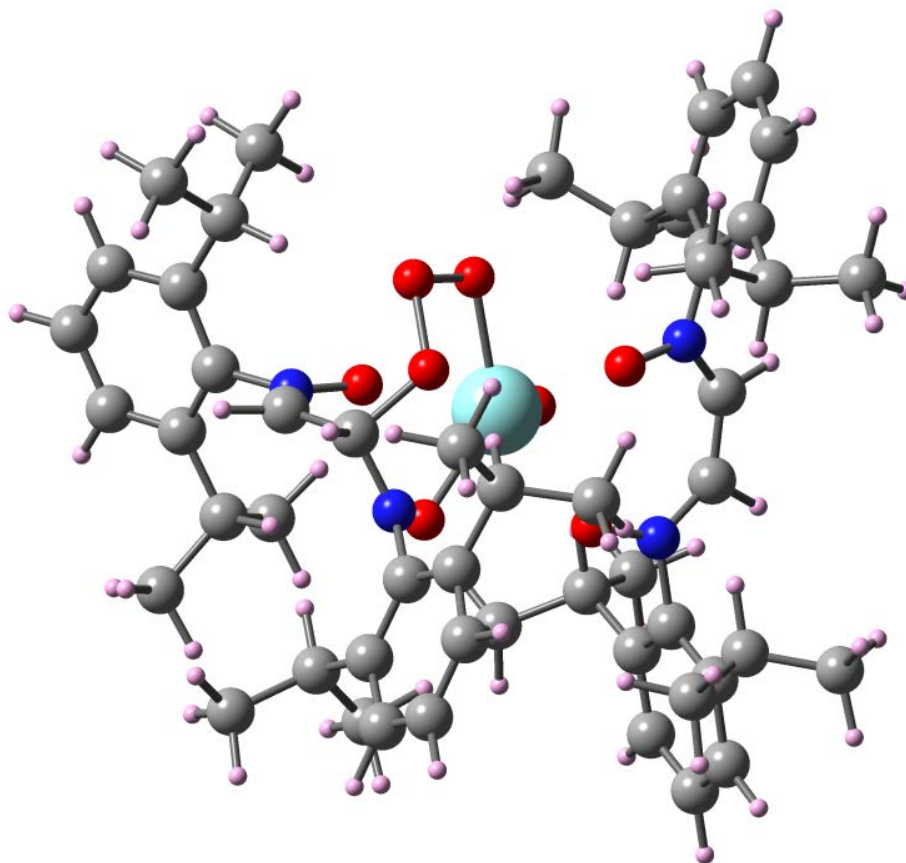

Fig. S125: ONCCNO Ligand Cyclization (conformation 2 higher energy)

| SCF            | E <sub>ZP</sub> | H            | G            |
|----------------|-----------------|--------------|--------------|
| -2891.74093040 | -2890.577721    | -2890.504492 | -2890.690763 |
| O              | -2.26187000     | 1.01212500   | -0.59403600  |
| O              | 1.53670800      | -1.15404100  | -0.50570500  |
| O              | -0.94295900     | 0.83296100   | 2.20088700   |
| N              | 2.88857800      | 1.86834000   | -0.28288700  |
| N              | 2.53313900      | -1.14587400  | -1.38947800  |
| N              | -1.42555500     | -1.37988400  | 1.68846700   |
| N              | -3.31432900     | 0.74787400   | 0.20643600   |
| C              | 3.43920800      | 1.23215200   | -1.30596300  |
| C              | 3.31023800      | -0.12294800  | -1.75336800  |
| C              | -2.06922700     | -0.23835500  | 2.19411700   |
| C              | -3.27785300     | 0.23285900   | 1.41574700   |
| C              | 3.22052900      | 3.27485000   | -0.00889300  |
| C              | 2.73317800      | 4.27955100   | -0.88123100  |
| C              | 3.09922800      | 5.60932300   | -0.57544000  |
| C              | 3.88160000      | 5.91188900   | 0.54739900   |
| C              | 4.31557000      | 4.88855600   | 1.40633700   |
| C              | 3.99277700      | 3.54169800   | 1.15077700   |

|   |             |             |             |
|---|-------------|-------------|-------------|
| C | 0.44467400  | 4.71939900  | -1.87346700 |
| C | 1.81009800  | 4.00912500  | -2.07520800 |
| C | 2.47311400  | 4.43840600  | -3.41010900 |
| C | -0.22979600 | -2.19798100 | -4.18188200 |
| C | 1.18958100  | -1.61656000 | -3.95620000 |
| C | 1.79067800  | -1.09692000 | -5.28865400 |
| C | 2.74849400  | -2.44459800 | -2.06178400 |
| C | 2.10712100  | -2.65648900 | -3.30417400 |
| C | 2.34112200  | -3.90032600 | -3.92955300 |
| C | 3.15122100  | -4.87491400 | -3.32600400 |
| C | 3.74091700  | -4.63497600 | -2.07411400 |
| C | 3.54897800  | -3.40785600 | -1.40554300 |
| C | 3.56777400  | 2.49506500  | 3.40757000  |
| C | 4.43970300  | 2.44590800  | 2.12359700  |
| C | 5.94829300  | 2.53584300  | 2.46475400  |
| C | 3.45016300  | -4.08616400 | 1.02995300  |
| C | 4.15234700  | -3.17988700 | -0.01670200 |
| C | 5.68686600  | -3.39779900 | -0.00614400 |
| C | -1.09582500 | -2.59127600 | 2.38951700  |
| C | -0.20557800 | -2.58814100 | 3.50438300  |
| C | 0.05422200  | -3.81718100 | 4.15034900  |
| C | -0.50056500 | -5.01873000 | 3.69023800  |
| C | -1.34979700 | -5.00888200 | 2.57244400  |
| C | -1.67645100 | -3.80634400 | 1.91612100  |
| C | 2.02759800  | -1.49354400 | 4.06570500  |
| C | 0.48644400  | -1.32741100 | 4.03140900  |
| C | -0.05005700 | -0.92898500 | 5.43261600  |
| C | -3.86306500 | -0.75334500 | -3.23339600 |
| C | -4.48888600 | -0.99299900 | -1.83191800 |
| C | -5.44507800 | -2.21084300 | -1.85029300 |
| C | -4.60330800 | 1.14763900  | -0.38847100 |
| C | -5.17984100 | 0.28584100  | -1.35152600 |
| C | -6.40968200 | 0.68944600  | -1.91111900 |
| C | -7.01511600 | 1.89912900  | -1.53306500 |
| C | -6.39185500 | 2.74326600  | -0.60182200 |
| C | -5.15766000 | 2.39368500  | -0.01143000 |
| C | -1.91438200 | -4.42909500 | -0.52687200 |
| C | -2.62821800 | -3.83832000 | 0.71807300  |
| C | -3.93605900 | -4.60946700 | 1.03001100  |
| C | -4.03780300 | 4.65519300  | 0.16913400  |
| C | -4.46040200 | 3.37408500  | 0.93724000  |
| C | -5.34763800 | 3.72365500  | 2.15934200  |
| H | 4.13026700  | 1.83487500  | -1.88379500 |
| H | 3.99375600  | -0.38364700 | -2.55342100 |
| H | -2.36803200 | -0.39952800 | 3.23256600  |
| H | -4.24536600 | 0.11437400  | 1.89137300  |
| H | 2.74682000  | 6.41270800  | -1.21606000 |
| H | 4.14280800  | 6.94535600  | 0.76247900  |
| H | 4.90767800  | 5.13877300  | 2.28194000  |
| H | 1.57614200  | 2.94176000  | -2.14131600 |
| H | 1.06458700  | -0.75511400 | -3.29021000 |
| H | 0.55381400  | 5.81240900  | -1.83538900 |

|   |             |             |             |
|---|-------------|-------------|-------------|
| H | -0.03276500 | 4.37727700  | -0.94843200 |
| H | -0.22174400 | 4.46964100  | -2.70876400 |
| H | 2.67734700  | 5.51748800  | -3.43484300 |
| H | 1.80352800  | 4.20393200  | -4.24727500 |
| H | 3.42547300  | 3.91614500  | -3.58199000 |
| H | -0.22148900 | -3.03912900 | -4.88872800 |
| H | -0.88432400 | -1.41724600 | -4.58774200 |
| H | -0.66349700 | -2.54424800 | -3.23619300 |
| H | 2.78486900  | -0.65409100 | -5.13843900 |
| H | 1.13875100  | -0.32300800 | -5.71259000 |
| H | 1.89049400  | -1.90164300 | -6.02989100 |
| H | 1.87632600  | -4.10842800 | -4.88952800 |
| H | 3.31430800  | -5.82688400 | -3.82570100 |
| H | 4.34961200  | -5.40670900 | -1.61082800 |
| H | 4.26434600  | 1.46746400  | 1.66271000  |
| H | 3.96419700  | -2.14308800 | 0.28622500  |
| H | 3.69655000  | 3.44984500  | 3.93489000  |
| H | 3.85634400  | 1.68633300  | 4.09256800  |
| H | 2.50891100  | 2.37797900  | 3.15439400  |
| H | 6.19035500  | 3.45663500  | 3.01043800  |
| H | 6.56888500  | 2.50796500  | 1.55936600  |
| H | 6.23683500  | 1.69107500  | 3.10395200  |
| H | 2.37262800  | -3.88991800 | 1.05783800  |
| H | 3.85974600  | -3.89728100 | 2.03088200  |
| H | 3.60000500  | -5.14884600 | 0.79794300  |
| H | 5.94877300  | -4.43610900 | -0.24654500 |
| H | 6.09153700  | -3.17643900 | 0.98997200  |
| H | 6.19125100  | -2.74771000 | -0.73306400 |
| H | 0.71704700  | -3.83234500 | 5.01212600  |
| H | -0.27291100 | -5.95456300 | 4.19576300  |
| H | -1.77754200 | -5.94331800 | 2.21815000  |
| H | 0.27336400  | -0.49693500 | 3.35562400  |
| H | -3.65987500 | -1.22845400 | -1.15535000 |
| H | 2.34285400  | -2.26981300 | 4.77590900  |
| H | 2.49664800  | -0.54853400 | 4.37057300  |
| H | 2.41211300  | -1.76090800 | 3.07370300  |
| H | -1.13512500 | -0.75951500 | 5.41526800  |
| H | 0.42952000  | -0.00224900 | 5.77367200  |
| H | 0.15226300  | -1.71198800 | 6.17614900  |
| H | -4.63416800 | -0.49287100 | -3.97139800 |
| H | -3.35266500 | -1.66213700 | -3.57709400 |
| H | -3.12813800 | 0.05782300  | -3.19152400 |
| H | -5.89990300 | -2.38182000 | -0.86597900 |
| H | -4.88913900 | -3.11437700 | -2.13197200 |
| H | -6.25512100 | -2.08313700 | -2.58007700 |
| H | -6.89211600 | 0.05633800  | -2.65030500 |
| H | -7.96499400 | 2.18964400  | -1.97574000 |
| H | -6.85659600 | 3.68907100  | -0.33724400 |
| H | -2.88990000 | -2.80563800 | 0.46994700  |
| H | -3.53675800 | 2.92466700  | 1.31269000  |
| H | -1.59881000 | -5.46679300 | -0.34934900 |
| H | -1.03222400 | -3.82821400 | -0.77044400 |

|    |             |             |             |
|----|-------------|-------------|-------------|
| H  | -2.58965800 | -4.42494800 | -1.39431700 |
| H  | -4.62712900 | -4.53569300 | 0.17997200  |
| H  | -4.43943000 | -4.20277800 | 1.91733800  |
| H  | -3.75061000 | -5.67644100 | 1.21027100  |
| H  | -3.36947500 | 4.40461100  | -0.66241300 |
| H  | -3.49821900 | 5.33276400  | 0.84289100  |
| H  | -4.90842200 | 5.19182500  | -0.23212900 |
| H  | -5.63408900 | 2.82427200  | 2.72101500  |
| H  | -6.27008400 | 4.23805800  | 1.85852400  |
| H  | -4.80067800 | 4.38890200  | 2.83948700  |
| O  | 0.40309700  | 0.99176100  | -1.89668900 |
| O  | -1.29711700 | 2.33967600  | 1.84481900  |
| O  | -0.43806300 | 2.60522400  | 0.69366300  |
| O  | -1.06891900 | -1.27477200 | 0.29214100  |
| O  | 2.04371000  | 1.27886200  | 0.58768600  |
| Zr | -0.04312100 | 0.61344000  | -0.16293400 |

## 9.6 Structures with nine oxygen atoms

Peroxo  $\eta^2$ -Ozone Complex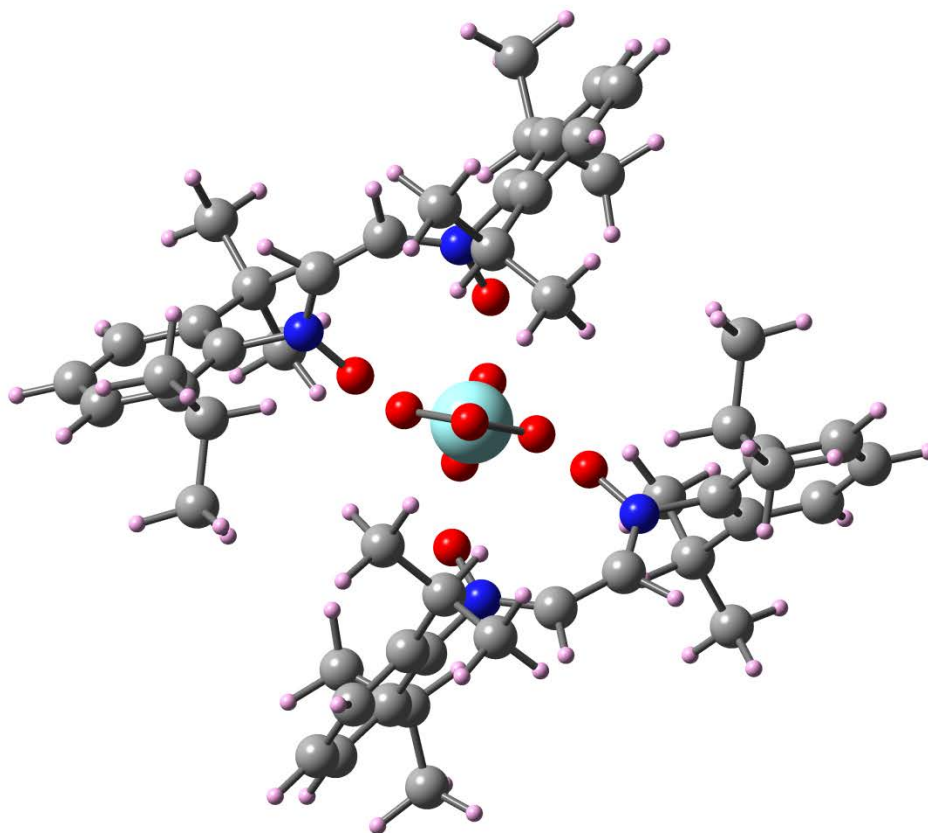Fig. S126: ONCCNO Peroxo  $\eta^2$ -Ozone Complex

| SCF          | E <sub>ZP</sub> | H            | G            |
|--------------|-----------------|--------------|--------------|
| -2966.896837 | -2965.730543    | -2965.655892 | -2965.844937 |

|   |             |             |             |
|---|-------------|-------------|-------------|
| O | 0.33839459  | 2.18833717  | -0.33306761 |
| O | -0.33711554 | -2.18261190 | -0.33321509 |
| O | -1.15182385 | 0.21174141  | 1.21321288  |
| N | 2.93738278  | -1.59464608 | -0.52648574 |
| N | 0.18683854  | -3.08744862 | 0.50395065  |
| N | -2.93373687 | 1.58473186  | -0.53127008 |
| N | -0.19152019 | 3.09425087  | 0.49822479  |
| C | 2.67844392  | -2.61008949 | 0.30599294  |
| C | 1.48901894  | -3.24093655 | 0.76989728  |
| C | -2.68038289 | 2.60241298  | 0.29983861  |
| C | -1.49479013 | 3.24160550  | 0.76251837  |
| C | 4.33200265  | -1.29555562 | -0.88655550 |
| C | 4.77028842  | -1.69111583 | -2.17518041 |
| C | 6.10640414  | -1.38999569 | -2.50980720 |
| C | 6.94875145  | -0.72580861 | -1.60238808 |

|   |             |             |             |
|---|-------------|-------------|-------------|
| C | 6.46712093  | -0.32674310 | -0.34665612 |
| C | 5.13396672  | -0.58802766 | 0.03929380  |
| C | 3.32201833  | -1.30906702 | -4.21318450 |
| C | 3.83987481  | -2.36042890 | -3.19176478 |
| C | 4.50813833  | -3.55780348 | -3.91169338 |
| C | -2.29336344 | -4.31419858 | -2.13540625 |
| C | -1.11521829 | -4.94194245 | -1.34301594 |
| C | -0.79097209 | -6.36707040 | -1.85890383 |
| C | -0.78887828 | -4.03272286 | 1.06585185  |
| C | -1.41544750 | -4.92776423 | 0.15995587  |
| C | -2.36351186 | -5.82133943 | 0.69815869  |
| C | -2.66059468 | -5.82356107 | 2.07073105  |
| C | -2.02183100 | -4.92211041 | 2.93428453  |
| C | -1.07444682 | -3.99148909 | 2.45335441  |
| C | 4.77922037  | 1.45258663  | 1.50758932  |
| C | 4.61112323  | -0.08458174 | 1.38952161  |
| C | 5.31609496  | -0.80701538 | 2.56817297  |
| C | -1.48934551 | -2.15032008 | 4.16122127  |
| C | -0.42360288 | -3.00415039 | 3.42906514  |
| C | 0.48509270  | -3.74659057 | 4.44494773  |
| C | -4.32641959 | 1.27762880  | -0.89168906 |
| C | -5.12620278 | 0.56899111  | 0.03524008  |
| C | -6.45784906 | 0.30081856  | -0.35125998 |
| C | -6.94006876 | 0.69443055  | -1.60845833 |
| C | -6.09982959 | 1.36002252  | -2.51679132 |
| C | -4.76540831 | 1.66801211  | -2.18172610 |
| C | -4.76671932 | -1.46575045 | 1.51039629  |
| C | -4.60256997 | 0.07143505  | 1.38733910  |
| C | -5.31004678 | 0.79574611  | 2.56336774  |
| C | 2.27695825  | 4.31885661  | -2.14681069 |
| C | 1.09806600  | 4.94865338  | -1.35707103 |
| C | 0.77064068  | 6.37018889  | -1.88070376 |
| C | 0.77861642  | 4.04793138  | 1.05584401  |
| C | 1.39916383  | 4.94295367  | 0.14579156  |
| C | 2.34230559  | 5.84421258  | 0.67976051  |
| C | 2.64046160  | 5.85357087  | 2.05207849  |
| C | 2.00778249  | 4.95180164  | 2.91974698  |
| C | 1.06552766  | 4.01372237  | 2.44319510  |
| C | -3.31540577 | 1.28927256  | -4.21923948 |
| C | -3.83754248 | 2.33972780  | -3.19908650 |
| C | -4.51057531 | 3.53350119  | -3.92056481 |
| C | 1.49367131  | 2.18067952  | 4.15609522  |
| C | 0.42166791  | 3.02592575  | 3.42301358  |
| C | -0.48970062 | 3.76630276  | 4.43794169  |
| H | 3.58376852  | -3.07005158 | 0.68607115  |
| H | 1.67712666  | -4.06377217 | 1.45024804  |
| H | -3.58829003 | 3.05776001  | 0.67938869  |
| H | -1.68793817 | 4.06594322  | 1.43962872  |
| H | 6.48885229  | -1.67523385 | -3.48553885 |
| H | 7.97725956  | -0.50809868 | -1.88093696 |
| H | 7.12322934  | 0.20802589  | 0.33487992  |
| H | 2.95715101  | -2.74349808 | -2.66629078 |

|   |             |             |             |
|---|-------------|-------------|-------------|
| H | -0.24050580 | -4.31342902 | -1.53879976 |
| H | 4.15869525  | -0.84162743 | -4.75117606 |
| H | 2.73859959  | -0.53271003 | -3.70894947 |
| H | 2.66650338  | -1.79324529 | -4.94847304 |
| H | 5.33402973  | -3.23643265 | -4.55952466 |
| H | 3.77089624  | -4.05990379 | -4.55115763 |
| H | 4.90247640  | -4.29436491 | -3.19886296 |
| H | -3.22219462 | -4.88027910 | -1.97980355 |
| H | -2.06711874 | -4.31275125 | -3.20927421 |
| H | -2.45377428 | -3.27686251 | -1.82492208 |
| H | 0.03878484  | -6.82011021 | -1.30030383 |
| H | -0.50542560 | -6.32034325 | -2.91771313 |
| H | -1.65606986 | -7.03822722 | -1.78148757 |
| H | -2.86788373 | -6.52272222 | 0.03958853  |
| H | -3.39211053 | -6.52505193 | 2.46502710  |
| H | -2.26834895 | -4.92875159 | 3.99261178  |
| H | 3.53614065  | -0.28224869 | 1.46254263  |
| H | 0.19130774  | -2.29145206 | 2.87338610  |
| H | 5.83509660  | 1.75361645  | 1.47792999  |
| H | 4.35574494  | 1.80186125  | 2.45759210  |
| H | 4.25144246  | 1.96663423  | 0.69592566  |
| H | 6.39737199  | -0.61388657 | 2.56815250  |
| H | 5.17213983  | -1.89516662 | 2.52147646  |
| H | 4.90953147  | -0.45326952 | 3.52445442  |
| H | -2.06490869 | -1.56339573 | 3.43805257  |
| H | -0.99220093 | -1.44547504 | 4.83931641  |
| H | -2.17727015 | -2.76791420 | 4.75461752  |
| H | -0.09365487 | -4.43733364 | 5.07279283  |
| H | 0.97844700  | -3.02265784 | 5.10630131  |
| H | 1.26644824  | -4.33338469 | 3.94211117  |
| H | -7.11222827 | -0.23509685 | 0.33102878  |
| H | -7.96734166 | 0.47144248  | -1.88738653 |
| H | -6.48268637 | 1.64114060  | -3.49355197 |
| H | -3.52818646 | 0.27252494  | 1.46014835  |
| H | 0.22433602  | 4.31748770  | -1.54898980 |
| H | -5.82185918 | -1.76940125 | 1.48205945  |
| H | -4.34212678 | -1.81101830 | 2.46131702  |
| H | -4.23803318 | -1.98111539 | 0.70015871  |
| H | -5.16846806 | 1.88407707  | 2.51370605  |
| H | -4.90343670 | 0.44566710  | 3.52098132  |
| H | -6.39089311 | 0.60023892  | 2.56304320  |
| H | 3.20504008  | 4.88679124  | -1.99349266 |
| H | 2.05068867  | 4.31256740  | -3.22064998 |
| H | 2.43840505  | 3.28301728  | -1.83203561 |
| H | -0.05871523 | 6.82539849  | -1.32326745 |
| H | 0.48315828  | 6.31662890  | -2.93866334 |
| H | 1.63490113  | 7.04309031  | -1.80922953 |
| H | 2.84204972  | 6.54601391  | 0.01811593  |
| H | 3.36815260  | 6.56093580  | 2.44294717  |
| H | 2.25513000  | 4.96408255  | 3.97782288  |
| H | -2.95640889 | 2.72696883  | -2.67406746 |
| H | -0.19000586 | 2.30806580  | 2.87042176  |



|    |             |             |             |
|----|-------------|-------------|-------------|
| H  | -4.15010767 | 0.81795187  | -4.75693055 |
| H  | -2.72907269 | 0.51577065  | -3.71398475 |
| H  | -2.66162465 | 1.77517681  | -4.95493324 |
| H  | -3.77539557 | 4.03752045  | -4.56088774 |
| H  | -4.90757962 | 4.26956036  | -3.20869447 |
| H  | -5.33540167 | 3.20808980  | -4.56773618 |
| H  | 2.07217667  | 1.59554327  | 3.43379048  |
| H  | 1.00194672  | 1.47450054  | 4.83674663  |
| H  | 2.17846307  | 2.80427563  | 4.74682171  |
| H  | -1.27565778 | 4.34638349  | 3.93447306  |
| H  | 0.08588740  | 4.46290301  | 5.06221513  |
| H  | -0.97728560 | 3.04171581  | 5.10284769  |
| O  | -0.23040456 | -0.70171125 | -2.60978047 |
| O  | 0.25618859  | 0.70997434  | -2.60467930 |
| O  | 0.00613738  | 0.00875068  | 2.14884726  |
| O  | 1.16076208  | -0.20308176 | 1.21090189  |
| O  | -2.03925320 | 0.81512764  | -1.15771216 |
| O  | 2.04794651  | -0.82046301 | -1.15315796 |
| Zr | 0.00423093  | 0.00188295  | -0.64220625 |

Peroxo  $\eta^3$ -Ozone Complex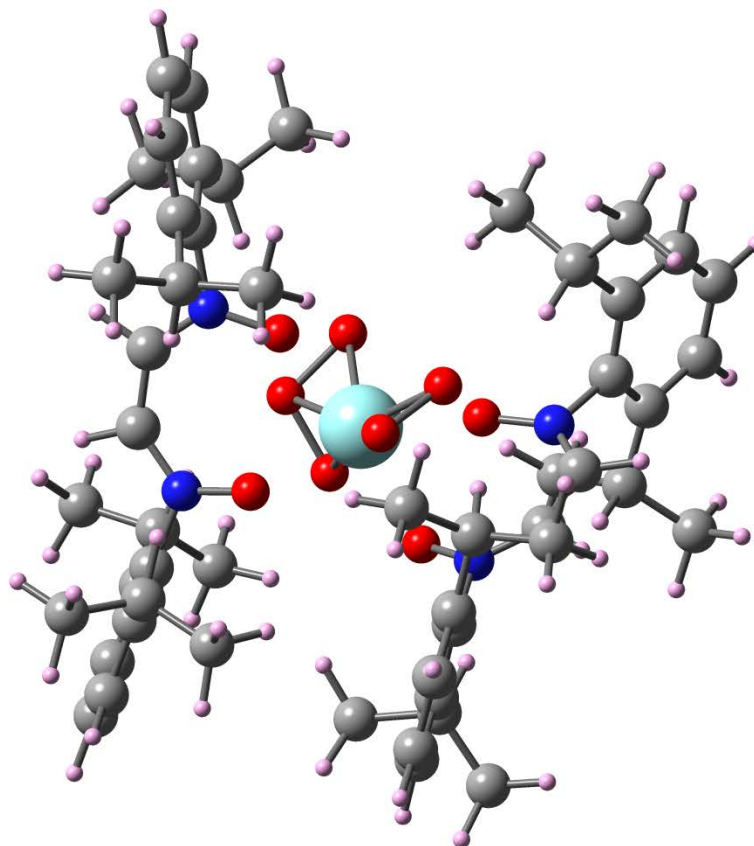Fig. S127: ONCCNO Peroxo  $\eta^3$ -Ozone Complex

| SCF          | E <sub>ZP</sub> | H            | G            |
|--------------|-----------------|--------------|--------------|
| -2966.887744 | -2965.722011    | -2965.647317 | -2965.837013 |

|   |             |             |             |
|---|-------------|-------------|-------------|
| O | -1.74123480 | -0.90386796 | -0.16260104 |
| O | 2.48671180  | 0.68080338  | -0.74603158 |
| O | 0.26224373  | 2.06974839  | -1.51681499 |
| N | 1.92453965  | -1.99719346 | 1.14443856  |
| N | 3.57713988  | 0.54706605  | -0.00067147 |
| N | -2.65083946 | 2.18214595  | 0.03514053  |
| N | -2.71223839 | -0.86271427 | -1.10179600 |
| C | 3.03528251  | -1.39586335 | 1.54932037  |
| C | 3.78908884  | -0.30990024 | 1.00264448  |
| C | -3.46444333 | 1.52707508  | -0.80758604 |
| C | -3.45756696 | 0.21019414  | -1.35721631 |
| C | 1.42195666  | -3.19489579 | 1.82806526  |
| C | 1.04286945  | -3.13158553 | 3.19632171  |
| C | 0.57898275  | -4.32985953 | 3.78291463  |
| C | 0.48586878  | -5.51926060 | 3.04841731  |
| C | 0.87397756  | -5.54545350 | 1.70017920  |
| C | 1.36196560  | -4.39050815 | 1.05732120  |

|   |             |             |             |
|---|-------------|-------------|-------------|
| C | -0.26234359 | -1.54581763 | 4.70459911  |
| C | 1.11150162  | -1.86879583 | 4.06541321  |
| C | 2.20584804  | -2.01418341 | 5.15795358  |
| C | 2.55195384  | 4.14074603  | 0.54734103  |
| C | 3.54525275  | 3.18645796  | 1.26766379  |
| C | 4.10956884  | 3.83717285  | 2.55399488  |
| C | 4.65001617  | 1.49957259  | -0.34812102 |
| C | 4.64511153  | 2.76116574  | 0.29079485  |
| C | 5.67343068  | 3.65671247  | -0.07503749 |
| C | 6.63134580  | 3.30552875  | -1.03896727 |
| C | 6.57581193  | 2.05531661  | -1.67793529 |
| C | 5.57201471  | 1.11953831  | -1.35246323 |
| C | 0.58452536  | -4.58276871 | -1.34929932 |
| C | 1.81298055  | -4.48415192 | -0.40640602 |
| C | 2.78931400  | -5.66606337 | -0.63796371 |
| C | 4.61339773  | 0.05187603  | -3.42645247 |
| C | 5.43354696  | -0.19479511 | -2.12778836 |
| C | 6.79297553  | -0.86248848 | -2.44358752 |
| C | -3.08424925 | 3.50269495  | 0.53851048  |
| C | -2.80300364 | 4.64425573  | -0.24599546 |
| C | -3.24086017 | 5.88477624  | 0.26775061  |
| C | -3.88957803 | 5.96624318  | 1.50935424  |
| C | -4.11068878 | 4.80951381  | 2.27593657  |
| C | -3.70917189 | 3.54099422  | 1.80905225  |
| C | -0.85158133 | 5.54183753  | -1.61488345 |
| C | -2.05978024 | 4.57274856  | -1.58388920 |
| C | -3.02240715 | 4.85413912  | -2.76848194 |
| C | -2.77427381 | -3.76647063 | 1.46458260  |
| C | -3.79546936 | -2.96172135 | 0.61969845  |
| C | -5.25229024 | -3.32487742 | 1.00863318  |
| C | -3.03588798 | -2.15200462 | -1.73314333 |
| C | -3.54111622 | -3.16823248 | -0.87799138 |
| C | -3.83261567 | -4.41477070 | -1.46585480 |
| C | -3.64254901 | -4.63070557 | -2.83990897 |
| C | -3.15994629 | -3.59841932 | -3.65567114 |
| C | -2.83773574 | -2.32852215 | -3.12678715 |
| C | -2.70813499 | 2.18457949  | 3.69431172  |
| C | -3.88081202 | 2.29064633  | 2.67816780  |
| C | -5.25016079 | 2.24375473  | 3.39863062  |
| C | -1.06863298 | -1.71442590 | -4.85670604 |
| C | -2.31929108 | -1.24055148 | -4.07533110 |
| C | -3.44200521 | -0.78588522 | -5.04808372 |
| H | 3.48514466  | -1.84301471 | 2.42808673  |
| H | 4.74195971  | -0.14844410 | 1.49432211  |
| H | -4.32009400 | 2.12265343  | -1.10265104 |
| H | -4.24827422 | 0.02840685  | -2.07591473 |
| H | 0.27714324  | -4.32148198 | 4.82641889  |
| H | 0.11639051  | -6.42425234 | 3.52502845  |
| H | 0.81161285  | -6.47560063 | 1.14274036  |
| H | 1.34182012  | -1.00668856 | 3.43702966  |
| H | 2.96180094  | 2.31184933  | 1.57430277  |
| H | -0.61538184 | -2.34784833 | 5.36743674  |

|   |             |             |             |
|---|-------------|-------------|-------------|
| H | -1.00404110 | -1.36817307 | 3.91995125  |
| H | -0.18180569 | -0.62596156 | 5.29810505  |
| H | 1.97495300  | -2.83484081 | 5.85046391  |
| H | 2.27545613  | -1.08812241 | 5.74313481  |
| H | 3.19749178  | -2.21822515 | 4.72843990  |
| H | 3.05005169  | 5.07023248  | 0.23624105  |
| H | 1.72934441  | 4.39622171  | 1.22708152  |
| H | 2.12106466  | 3.66076530  | -0.33872685 |
| H | 4.81773031  | 3.17251867  | 3.06707282  |
| H | 3.28568525  | 4.05406564  | 3.24546078  |
| H | 4.62481612  | 4.78468843  | 2.34624727  |
| H | 5.71449891  | 4.63667141  | 0.39177668  |
| H | 7.41381808  | 4.01247101  | -1.30509758 |
| H | 7.30942760  | 1.80935599  | -2.43971635 |
| H | 2.33779547  | -3.56391237 | -0.67749465 |
| H | 4.85678902  | -0.90338489 | -1.51977714 |
| H | -0.01434909 | -5.47764658 | -1.13009152 |
| H | 0.91549236  | -4.64197651 | -2.39460630 |
| H | -0.05074798 | -3.69848338 | -1.24221973 |
| H | 2.30374104  | -6.63919742 | -0.48911203 |
| H | 3.65489739  | -5.61421093 | 0.03584656  |
| H | 3.15924156  | -5.64010273 | -1.67146072 |
| H | 3.61856826  | 0.44478201  | -3.19125725 |
| H | 4.48916094  | -0.88881946 | -3.97940760 |
| H | 5.12927905  | 0.76827351  | -4.08023709 |
| H | 7.38501576  | -0.26768604 | -3.15096012 |
| H | 6.62499149  | -1.84330605 | -2.90660462 |
| H | 7.39454671  | -1.00966211 | -1.53690244 |
| H | -3.05659693 | 6.79034658  | -0.30341572 |
| H | -4.21309635 | 6.93324364  | 1.88745083  |
| H | -4.59537667 | 4.89326651  | 3.24408454  |
| H | -1.63661201 | 3.57146709  | -1.70989649 |
| H | -3.64153955 | -1.90697480 | 0.86729643  |
| H | -1.16208314 | 6.59434583  | -1.56086887 |
| H | -0.29333793 | 5.39834408  | -2.54782544 |
| H | -0.16783592 | 5.33516164  | -0.78416072 |
| H | -3.85801169 | 4.14108459  | -2.79300211 |
| H | -2.48062924 | 4.77036368  | -3.71902426 |
| H | -3.44781337 | 5.86521531  | -2.70623592 |
| H | -2.85724953 | -4.84435960 | 1.26956591  |
| H | -2.95361543 | -3.60024420 | 2.53490264  |
| H | -1.75210681 | -3.44957085 | 1.23697016  |
| H | -5.98195329 | -2.75681385 | 0.41637696  |
| H | -5.42076209 | -3.09678110 | 2.06934962  |
| H | -5.46078615 | -4.39288077 | 0.86431982  |
| H | -4.21983439 | -5.21755512 | -0.84472640 |
| H | -3.87408688 | -5.60071130 | -3.27359093 |
| H | -3.01809379 | -3.77751221 | -4.71761737 |
| H | -3.82126610 | 1.40316030  | 2.03556563  |
| H | -1.99351687 | -0.37390810 | -3.49683056 |
| H | -2.67537120 | 3.07166601  | 4.34187658  |
| H | -1.74958030 | 2.08143413  | 3.17594610  |

|    |             |             |             |
|----|-------------|-------------|-------------|
| H  | -2.84280253 | 1.29965739  | 4.33046207  |
| H  | -5.36276585 | 1.28160055  | 3.91464350  |
| H  | -6.08566595 | 2.35540193  | 2.69494232  |
| H  | -5.33846519 | 3.03075577  | 4.15852644  |
| H  | -0.26009023 | -1.94920148 | -4.15848673 |
| H  | -0.71454564 | -0.90443524 | -5.50675540 |
| H  | -1.27884201 | -2.58951473 | -5.48671768 |
| H  | -4.32945828 | -0.41925242 | -4.51218850 |
| H  | -3.76701571 | -1.60926362 | -5.69803753 |
| H  | -3.07465049 | 0.02550038  | -5.68923985 |
| O  | 1.15087846  | 0.92906308  | 1.58649076  |
| O  | -0.02220060 | 0.01470235  | 1.91670813  |
| O  | -0.63946964 | 0.99956796  | -2.14707673 |
| O  | 0.21968675  | -0.26334296 | -2.26706534 |
| O  | -1.49642825 | 1.77783243  | 0.53408717  |
| O  | 1.28304634  | -1.64842671 | -0.00430689 |
| Zr | 0.18380964  | 0.33359765  | -0.16824086 |

## Catalyst Deformation Product with Oxygen Splitting Ligand Apart

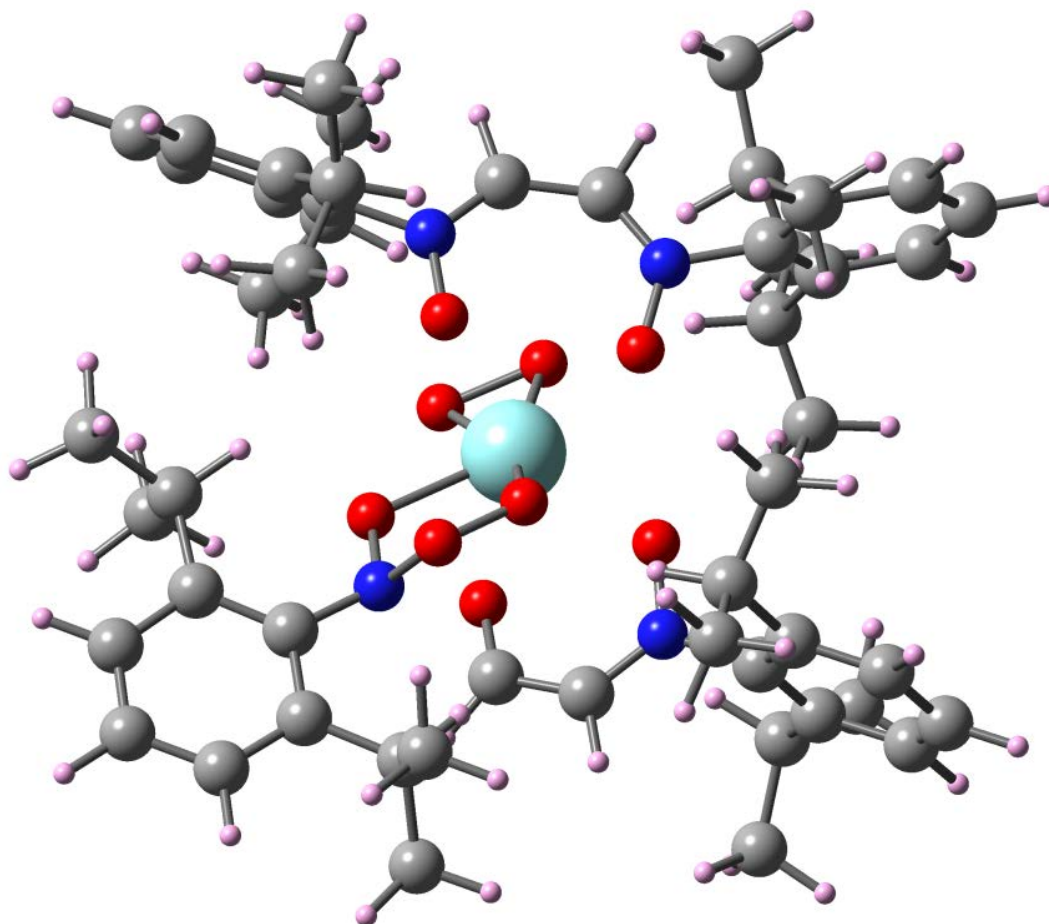

Fig. S128: ONCCNO Catalyst Deformation Product with Oxygen Splitting Ligand Apart

| SCF           | E <sub>ZP</sub> | H            | G            |
|---------------|-----------------|--------------|--------------|
| -2966.9301605 | -2965.764079    | -2965.690083 | -2965.875621 |

|    |             |             |             |
|----|-------------|-------------|-------------|
| Zr | 0.16315000  | 0.00692200  | -0.76350100 |
| O  | 1.65214800  | -1.22467600 | 0.46231400  |
| O  | -2.06755100 | 0.65456100  | -0.80671000 |
| O  | 0.02613900  | -1.66564600 | -1.98045200 |
| O  | 1.20680600  | -0.75696800 | -2.37940300 |
| N  | 1.49204700  | 2.60553000  | 0.04010300  |
| N  | -2.48177600 | 1.93255100  | -0.59865200 |
| N  | -1.08053700 | -2.88244200 | 0.34331100  |
| N  | 2.12541800  | -2.41570700 | 0.03967600  |
| C  | -0.48867500 | 2.91211700  | -1.61283500 |
| C  | -1.70426700 | 2.98784500  | -0.83520500 |
| C  | -0.05786400 | -3.67326800 | 0.02132600  |
| C  | 1.35261400  | -3.47441500 | -0.15008000 |
| C  | 2.51737900  | 3.62554500  | 0.25829500  |
| C  | 2.03105300  | 4.89513800  | 0.69520700  |

|   |             |             |             |
|---|-------------|-------------|-------------|
| C | 2.95007100  | 5.95364500  | 0.82738300  |
| C | 4.30781800  | 5.77449100  | 0.52869000  |
| C | 4.76821000  | 4.51336800  | 0.12775300  |
| C | 3.90513000  | 3.40165200  | 0.00513300  |
| C | 0.41448900  | 5.39376200  | 2.58502800  |
| C | 0.56401500  | 5.15383000  | 1.05908000  |
| C | -0.03564800 | 6.33392300  | 0.25129500  |
| C | -3.18663200 | 0.37204300  | 2.94469900  |
| C | -3.01905500 | 1.77036600  | 2.29603200  |
| C | -2.98730100 | 2.88473400  | 3.37283300  |
| C | -3.86144800 | 2.08030000  | -0.12713500 |
| C | -4.11956700 | 2.01209000  | 1.26232600  |
| C | -5.46280500 | 2.16385000  | 1.66942900  |
| C | -6.48672900 | 2.36794700  | 0.73196900  |
| C | -6.19378200 | 2.41581700  | -0.64087100 |
| C | -4.87133400 | 2.26297500  | -1.10549100 |
| C | 5.88178200  | 1.78403500  | 0.28694700  |
| C | 4.52209500  | 2.05501500  | -0.40529500 |
| C | 4.66902200  | 1.97807200  | -1.94915900 |
| C | -5.47344600 | 1.34887900  | -3.41475000 |
| C | -4.56983300 | 2.31548100  | -2.60766900 |
| C | -4.70501300 | 3.76608900  | -3.14554300 |
| C | -2.40402200 | -3.51221700 | 0.53831400  |
| C | -3.24172200 | -3.67434000 | -0.58928200 |
| C | -4.49829600 | -4.27771600 | -0.35965400 |
| C | -4.88421900 | -4.68761800 | 0.92488000  |
| C | -4.02407500 | -4.50018900 | 2.02002800  |
| C | -2.76057600 | -3.89775100 | 1.85413700  |
| C | -3.76201500 | -2.05153600 | -2.46100300 |
| C | -2.85485500 | -3.22209600 | -2.00030000 |
| C | -2.90591400 | -4.39934800 | -3.00815500 |
| C | 3.87813900  | -0.57063000 | 2.90439700  |
| C | 3.67660400  | -2.05238600 | 2.48933300  |
| C | 4.20251400  | -3.01581800 | 3.58448600  |
| C | 3.58807400  | -2.51885300 | -0.07053800 |
| C | 4.32804500  | -2.32537400 | 1.12773600  |
| C | 5.73147900  | -2.40131200 | 1.03028000  |
| C | 6.36037300  | -2.67015500 | -0.19594800 |
| C | 5.59535400  | -2.86561700 | -1.35402400 |
| C | 4.18508100  | -2.78738100 | -1.32943700 |
| C | -2.53648100 | -3.17809200 | 4.30431800  |
| C | -1.81351700 | -3.72000500 | 3.04687100  |
| C | -1.09431500 | -5.05837300 | 3.37503400  |
| C | 3.88712700  | -2.01553400 | -3.73795500 |
| C | 3.40384500  | -2.98902500 | -2.63377500 |
| C | 3.50626700  | -4.46231500 | -3.11351200 |
| H | -0.05307600 | 3.86158200  | -1.93263800 |
| H | -2.09968400 | 3.95293700  | -0.54360800 |
| H | -0.36303900 | -4.70395000 | -0.12179800 |
| H | 1.89182400  | -4.36786500 | -0.44209600 |
| H | 2.59905500  | 6.92612000  | 1.16290100  |
| H | 5.00339200  | 6.60557600  | 0.61928600  |

|   |             |             |             |
|---|-------------|-------------|-------------|
| H | 5.82550600  | 4.37977700  | -0.07877900 |
| H | -0.00876800 | 4.25562100  | 0.82842400  |
| H | -2.04306700 | 1.75914000  | 1.80149900  |
| H | 0.97386500  | 6.28094500  | 2.91054000  |
| H | 0.78369700  | 4.52735500  | 3.14519000  |
| H | -0.64227400 | 5.54546600  | 2.84568900  |
| H | 0.46260600  | 7.28331200  | 0.48466200  |
| H | -1.10136400 | 6.45797700  | 0.49165100  |
| H | 0.05961200  | 6.17020800  | -0.83084200 |
| H | -4.14976100 | 0.27905600  | 3.46708800  |
| H | -2.38066600 | 0.20700000  | 3.67099600  |
| H | -3.11796400 | -0.41212300 | 2.18258000  |
| H | -2.86229100 | 3.87759100  | 2.92017500  |
| H | -2.14263300 | 2.71554600  | 4.05229600  |
| H | -3.90572300 | 2.90234700  | 3.97568200  |
| H | -5.70373600 | 2.12169100  | 2.72815400  |
| H | -7.51400100 | 2.48529800  | 1.06925300  |
| H | -6.99825100 | 2.56482100  | -1.35591000 |
| H | 3.83780000  | 1.25793200  | -0.11247200 |
| H | -3.53606100 | 1.99145900  | -2.77186000 |
| H | 6.68161100  | 2.43997800  | -0.08216800 |
| H | 6.18779100  | 0.74995400  | 0.08132300  |
| H | 5.81164000  | 1.90955600  | 1.37534700  |
| H | 5.31110100  | 2.78773400  | -2.32473200 |
| H | 3.68868200  | 2.04837300  | -2.43107300 |
| H | 5.12252000  | 1.01996400  | -2.23750300 |
| H | -5.38444900 | 0.32251700  | -3.04227100 |
| H | -5.17654500 | 1.35610800  | -4.47156000 |
| H | -6.53019100 | 1.64182200  | -3.36472000 |
| H | -5.73125800 | 4.13663800  | -3.02253800 |
| H | -4.45644100 | 3.80146100  | -4.21417300 |
| H | -4.03436400 | 4.45628500  | -2.61759000 |
| H | -5.17615900 | -4.42210900 | -1.19629800 |
| H | -5.85676900 | -5.15011300 | 1.07568000  |
| H | -4.33991400 | -4.81687600 | 3.00977400  |
| H | -1.83030200 | -2.83711400 | -2.00416500 |
| H | 2.59599200  | -2.20604100 | 2.40683900  |
| H | -4.81902100 | -2.35108300 | -2.49902500 |
| H | -3.46059200 | -1.72610600 | -3.46492800 |
| H | -3.65781800 | -1.19630600 | -1.78438500 |
| H | -2.25707600 | -5.22830900 | -2.69440100 |
| H | -2.56321400 | -4.05591100 | -3.99203600 |
| H | -3.92375600 | -4.79511100 | -3.12561000 |
| H | 4.94553200  | -0.32213800 | 2.97941800  |
| H | 3.41521900  | -0.38673400 | 3.88278200  |
| H | 3.40907000  | 0.09859100  | 2.17675800  |
| H | 4.07395600  | -4.06719200 | 3.29456200  |
| H | 3.65215400  | -2.84837200 | 4.51962400  |
| H | 5.26669000  | -2.85322900 | 3.79765200  |
| H | 6.33501200  | -2.25584900 | 1.92160300  |
| H | 7.44514800  | -2.72584200 | -0.24748400 |
| H | 6.09446700  | -3.06600000 | -2.29762900 |



|   |             |             |             |
|---|-------------|-------------|-------------|
| H | -1.05044700 | -2.98062300 | 2.77712700  |
| H | 2.35314700  | -2.73801700 | -2.47413100 |
| H | -3.25134000 | -3.90543100 | 4.71065100  |
| H | -3.07634000 | -2.25170400 | 4.08288700  |
| H | -1.80192100 | -2.96551100 | 5.09183100  |
| H | -0.39792200 | -4.92169100 | 4.21263000  |
| H | -0.52288700 | -5.43490200 | 2.51673400  |
| H | -1.82059000 | -5.83135900 | 3.65898100  |
| H | 3.74705700  | -0.97922400 | -3.41561900 |
| H | 3.28305000  | -2.16064200 | -4.64205700 |
| H | 4.94177300  | -2.17340700 | -4.00280600 |
| H | 3.14119100  | -5.17172500 | -2.35635800 |
| H | 4.54332500  | -4.73793600 | -3.34836800 |
| H | 2.90631600  | -4.60027300 | -4.02204000 |
| O | 0.95139900  | 2.15054700  | 1.40552900  |
| O | -0.05942800 | 1.14755700  | 1.06086000  |
| O | 1.82076300  | 1.48638400  | -0.67313600 |
| O | -1.06767500 | -1.55615800 | 0.52509600  |
| O | -0.07500400 | 1.81225200  | -2.14501800 |

## 9.7 Structures with ten oxygen atoms

## Bisozone Complex

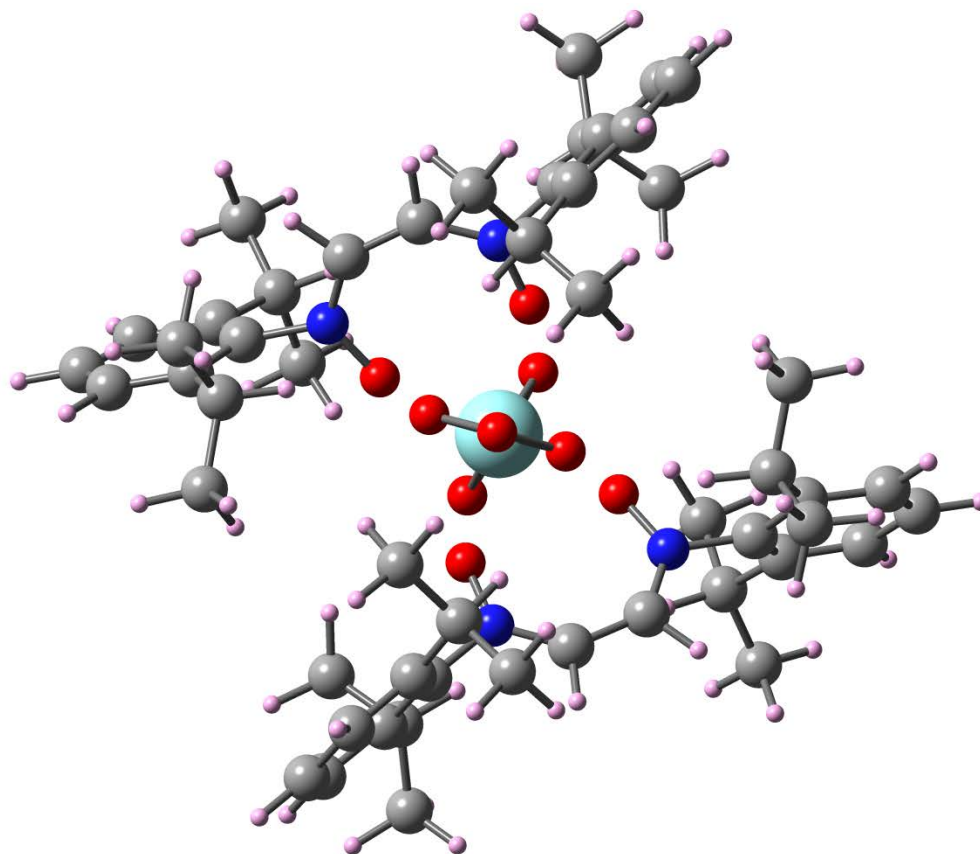

Fig. S129: ONCCNO Bisozone Complex

| SCF          | E <sub>ZP</sub> | H            | G            |
|--------------|-----------------|--------------|--------------|
| -3042.041589 | -3040.872886    | -3040.797459 | -3040.988246 |

|   |             |             |             |
|---|-------------|-------------|-------------|
| O | 0.41597868  | 2.16008176  | -0.13592893 |
| O | -0.40971900 | -2.12561414 | -0.13503583 |
| O | -1.11341890 | 0.26107701  | 1.28679494  |
| N | 2.90345598  | -1.73175640 | -0.47572813 |
| N | 0.10681517  | -3.13669449 | 0.55003205  |
| N | -2.88685052 | 1.67906078  | -0.51348668 |
| N | -0.13605590 | 3.17907255  | 0.50627263  |
| C | 2.61574531  | -2.81533552 | 0.24736256  |
| C | 1.40669054  | -3.41259511 | 0.70852475  |
| C | -2.63326300 | 2.78571833  | 0.18747515  |
| C | -1.44546602 | 3.42595637  | 0.64344312  |
| C | 4.30741773  | -1.43837552 | -0.80599554 |
| C | 4.75049777  | -1.75940104 | -2.11262389 |
| C | 6.09858406  | -1.47241204 | -2.41120369 |
| C | 6.94467530  | -0.89048451 | -1.45266474 |

|   |             |             |             |
|---|-------------|-------------|-------------|
| C | 6.45629085  | -0.55892653 | -0.17955061 |
| C | 5.11244169  | -0.81074598 | 0.17325774  |
| C | 3.39898417  | -1.21669898 | -4.17812363 |
| C | 3.81854466  | -2.33450834 | -3.18324980 |
| C | 4.44471068  | -3.54101379 | -3.92625644 |
| C | -2.54236863 | -4.09745285 | -2.01775209 |
| C | -1.36477218 | -4.83095186 | -1.32009100 |
| C | -1.14366980 | -6.23917164 | -1.92769036 |
| C | -0.89633473 | -4.05878926 | 1.10895559  |
| C | -1.59544537 | -4.88523877 | 0.19395355  |
| C | -2.55772605 | -5.76027105 | 0.73888187  |
| C | -2.79969061 | -5.80035527 | 2.12197691  |
| C | -2.09722253 | -4.95233990 | 2.99145871  |
| C | -1.13216344 | -4.04366265 | 2.50465816  |
| C | 4.78248417  | 1.13763362  | 1.76733480  |
| C | 4.58084632  | -0.38388976 | 1.54604981  |
| C | 5.24945122  | -1.19993780 | 2.68393856  |
| C | -1.42422906 | -2.23221985 | 4.26807261  |
| C | -0.41355929 | -3.09747744 | 3.47378072  |
| C | 0.51557828  | -3.88591057 | 4.43487479  |
| C | -4.27717916 | 1.33805218  | -0.84953173 |
| C | -5.08197976 | 0.73034682  | 0.14257890  |
| C | -6.41526987 | 0.43555897  | -0.21719446 |
| C | -6.89325166 | 0.70656053  | -1.50838510 |
| C | -6.04681254 | 1.26923868  | -2.47805071 |
| C | -4.70976857 | 1.59836014  | -2.17355154 |
| C | -4.73630628 | -1.15069420 | 1.81114024  |
| C | -4.55949801 | 0.36515110  | 1.53674705  |
| C | -5.25709081 | 1.20930255  | 2.63603256  |
| C | 2.46200045  | 4.18478390  | -2.09142751 |
| C | 1.26407292  | 4.89200715  | -1.40110520 |
| C | 0.99190004  | 6.28012970  | -2.03370281 |
| C | 0.83661547  | 4.14602521  | 1.04297365  |
| C | 1.49984855  | 4.98177416  | 0.11028443  |
| C | 2.43341003  | 5.89924485  | 0.63500005  |
| C | 2.68272005  | 5.96957277  | 2.01556668  |
| C | 2.01719608  | 5.11048827  | 2.90320369  |
| C | 1.08200449  | 4.16080205  | 2.43668162  |
| C | -3.31784688 | 1.01315537  | -4.20071168 |
| C | -3.77764236 | 2.15613081  | -3.25327508 |
| C | -4.42344172 | 3.31838116  | -4.04817096 |
| C | 1.44861391  | 2.37955134  | 4.21547100  |
| C | 0.40260415  | 3.20369753  | 3.42289723  |
| C | -0.54115101 | 3.97307890  | 4.38481436  |
| H | 3.50376794  | -3.36659557 | 0.53612566  |
| H | 1.56563083  | -4.31384640 | 1.28925758  |
| H | -3.53814927 | 3.31956368  | 0.45623092  |
| H | -1.63300772 | 4.33912831  | 1.19641239  |
| H | 6.48592482  | -1.70245405 | -3.39952770 |
| H | 7.98204078  | -0.68216867 | -1.70422679 |
| H | 7.11623208  | -0.08498552 | 0.54216407  |
| H | 2.89686798  | -2.68510577 | -2.70440001 |

|   |             |             |             |
|---|-------------|-------------|-------------|
| H | -0.46855289 | -4.23640496 | -1.52709312 |
| H | 4.27953700  | -0.78368568 | -4.67313871 |
| H | 2.84876709  | -0.42272841 | -3.66421967 |
| H | 2.73765556  | -1.63153122 | -4.94927423 |
| H | 5.31624445  | -3.24469373 | -4.52431821 |
| H | 3.70744976  | -3.97153827 | -4.61590914 |
| H | 4.76362343  | -4.32804163 | -3.22965071 |
| H | -3.49440535 | -4.61607754 | -1.83770001 |
| H | -2.36822394 | -4.05567105 | -3.09993186 |
| H | -2.62115139 | -3.06743250 | -1.65675904 |
| H | -0.31703265 | -6.76831148 | -1.43499000 |
| H | -0.90329650 | -6.14698108 | -2.99450588 |
| H | -2.04166430 | -6.86515181 | -1.84629625 |
| H | -3.11813894 | -6.41448240 | 0.07725340  |
| H | -3.54278393 | -6.48708388 | 2.52061146  |
| H | -2.30844605 | -4.98278194 | 4.05693253  |
| H | 3.49992357  | -0.55584768 | 1.58977560  |
| H | 0.19850982  | -2.39014571 | 2.90649063  |
| H | 5.84474837  | 1.41651942  | 1.76299984  |
| H | 4.36075347  | 1.43075327  | 2.73701013  |
| H | 4.26978498  | 1.71546107  | 0.98977150  |
| H | 6.33521864  | -1.03593651 | 2.71092111  |
| H | 5.07860737  | -2.27851265 | 2.56374777  |
| H | 4.83781321  | -0.89846514 | 3.65582159  |
| H | -2.02018175 | -1.62032860 | 3.58324038  |
| H | -0.87994277 | -1.55090912 | 4.93393622  |
| H | -2.09818676 | -2.84463448 | 4.88253828  |
| H | -0.05668876 | -4.57451203 | 5.07105868  |
| H | 1.05483787  | -3.19031151 | 5.09062572  |
| H | 1.25930965  | -4.48110002 | 3.88725903  |
| H | -7.07475966 | -0.02493745 | 0.51357435  |
| H | -7.92235599 | 0.46572702  | -1.76485736 |
| H | -6.42553379 | 1.45203103  | -3.47942325 |
| H | -3.48251351 | 0.55972359  | 1.58604418  |
| H | 0.38725299  | 4.26402948  | -1.59253479 |
| H | -5.79348634 | -1.44784197 | 1.80713863  |
| H | -4.31919124 | -1.40176640 | 2.79439788  |
| H | -4.20639351 | -1.74669916 | 1.05927685  |
| H | -5.10793208 | 2.28595751  | 2.47648377  |
| H | -4.84980477 | 0.95414125  | 3.62289693  |
| H | -6.33936294 | 1.02306285  | 2.65835679  |
| H | 3.39918966  | 4.73151183  | -1.91663815 |
| H | 2.28914060  | 4.12705265  | -3.17309032 |
| H | 2.56804628  | 3.16063553  | -1.72101385 |
| H | 0.15120423  | 6.79089766  | -1.54532348 |
| H | 0.74774078  | 6.15925614  | -3.09681027 |
| H | 1.86878500  | 6.93764370  | -1.97128978 |
| H | 2.96657051  | 6.56191124  | -0.04064419 |
| H | 3.40328280  | 6.68874751  | 2.39808809  |
| H | 2.23445859  | 5.16518734  | 3.96652559  |
| H | -2.87124393 | 2.54673126  | -2.77651737 |
| H | -0.19320039 | 2.47240783  | 2.86879354  |

|    |             |             |             |
|----|-------------|-------------|-------------|
| H  | -4.18083533 | 0.54375406  | -4.69373999 |
| H  | -2.75892043 | 0.25055444  | -3.64979116 |
| H  | -2.65285955 | 1.41491463  | -4.97549556 |
| H  | -3.68856958 | 3.74054428  | -4.74551789 |
| H  | -4.76932118 | 4.12313269  | -3.38542901 |
| H  | -5.28066886 | 2.97867540  | -4.64390730 |
| H  | 2.05752306  | 1.77996437  | 3.53097746  |
| H  | 0.93367016  | 1.68836681  | 4.89426164  |
| H  | 2.10873871  | 3.02053246  | 4.81550743  |
| H  | -1.31017758 | 4.53572883  | 3.83786321  |
| H  | 0.01502078  | 4.68846533  | 5.00551661  |
| H  | -1.04953716 | 3.26860925  | 5.05565280  |
| O  | -0.46983278 | -1.01927215 | -2.42787277 |
| O  | 0.58957890  | 1.05809255  | -2.39213978 |
| O  | 0.02896117  | 0.03265987  | 2.22607145  |
| O  | 1.15893161  | -0.22127868 | 1.27833514  |
| O  | -1.98819255 | 0.83839580  | -1.03562493 |
| O  | 2.03699666  | -0.87244083 | -1.01453430 |
| O  | 0.08841098  | 0.02168662  | -3.35154711 |
| Zr | 0.02187148  | 0.01231114  | -0.59144603 |

## 10. ONCCNO Triplet Ground States

### 10.1 Structures with four oxygen atoms

#### Bare Complex

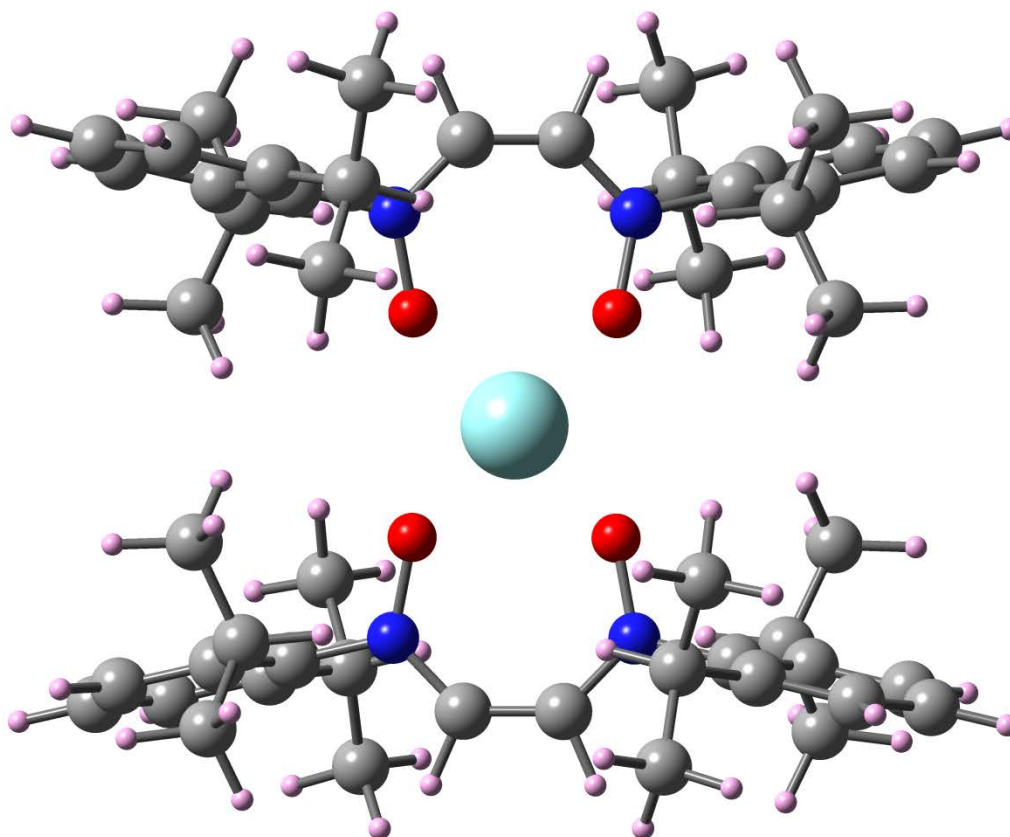

Fig. S130: ONCCNO Bare Complex

| SCF          | E <sub>ZP</sub> | H            | G            |
|--------------|-----------------|--------------|--------------|
| -2590.980253 | -2589.833472    | -2589.763183 | -2589.951545 |

|   |             |             |             |
|---|-------------|-------------|-------------|
| O | 1.37418114  | 1.50042623  | -0.17489901 |
| O | -1.37366416 | -1.50138432 | -0.17680102 |
| N | 1.60821134  | -2.85739342 | 0.38946307  |
| N | -1.62911615 | -2.84685354 | -0.39422205 |
| N | -1.60836135 | 2.85669034  | 0.38710407  |
| N | 1.62903914  | 2.84555846  | -0.39551805 |
| C | 0.65891123  | -3.83624161 | 0.16471503  |
| C | -0.68728897 | -3.83191265 | -0.16534701 |
| C | -0.65888125 | 3.83542652  | 0.16285103  |
| C | 0.68732396  | 3.83089456  | -0.16711001 |
| C | 2.96603156  | -3.17366141 | 0.77417913  |
| C | 3.96772971  | -3.23113439 | -0.23064603 |

|   |             |             |             |
|---|-------------|-------------|-------------|
| C | 5.28480493  | -3.53889238 | 0.16889403  |
| C | 5.59188997  | -3.78188342 | 1.51778125  |
| C | 4.58795783  | -3.70602043 | 2.49600639  |
| C | 3.25804862  | -3.38884344 | 2.14638934  |
| C | 4.28918971  | -1.59933712 | -2.14124633 |
| C | 3.65330466  | -2.94492136 | -1.70054425 |
| C | 4.10232978  | -4.10305752 | -2.62769239 |
| C | -2.54187631 | -2.06496645 | -4.18553663 |
| C | -2.22458323 | -3.25127462 | -3.23672249 |
| C | -2.06332216 | -4.57135582 | -4.03351561 |
| C | -2.99063635 | -3.15394263 | -0.77323411 |
| C | -3.28936138 | -3.37206668 | -2.14357232 |
| C | -4.62355159 | -3.67743077 | -2.48731337 |
| C | -5.62475674 | -3.74023381 | -1.50534122 |
| C | -5.31056469 | -3.49564777 | -0.15842201 |
| C | -3.98925649 | -3.19862767 | 0.23525005  |
| C | 2.52687046  | -2.08583927 | 4.19791065  |
| C | 2.19028845  | -3.25515346 | 3.23504950  |
| C | 1.99718446  | -4.57983667 | 4.01728161  |
| C | -4.29851161 | -1.56442544 | 2.14641533  |
| C | -3.66721046 | -2.91124662 | 1.70331227  |
| C | -4.11406648 | -4.06833481 | 2.63297441  |
| C | -2.96554458 | 3.17272533  | 0.77412713  |
| C | -3.25512663 | 3.38876235  | 2.14673333  |
| C | -4.58436684 | 3.70629235  | 2.49850639  |
| C | -5.59010701 | 3.78125833  | 1.52206423  |
| C | -5.28549795 | 3.53707631  | 0.17282703  |
| C | -3.96909573 | 3.22924431  | -0.22889203 |
| C | -2.52288046 | 2.09271419  | 4.20268065  |
| C | -2.18527245 | 3.25637038  | 3.23346551  |
| C | -1.98632348 | 4.58421859  | 4.00899361  |
| C | 2.54546030  | 2.07005237  | -4.19570163 |
| C | 2.22205721  | 3.24780054  | -3.23846548 |
| C | 2.05055614  | 4.57207373  | -4.02625761 |
| C | 2.99021634  | 3.15261355  | -0.77565711 |
| C | 3.28780137  | 3.36958060  | -2.14639233 |
| C | 4.62133656  | 3.67639569  | -2.49136837 |
| C | 5.62316673  | 3.74114673  | -1.51017222 |
| C | 5.31024871  | 3.49711769  | -0.16283501 |
| C | 3.98955348  | 3.19903659  | 0.23205705  |
| C | -4.29290372 | 1.59548404  | -2.13738731 |
| C | -3.65732368 | 2.94194927  | -1.69913925 |
| C | -4.10912578 | 4.09903444  | -2.62629639 |
| C | 4.30183760  | 1.56670035  | 2.14428233  |
| C | 3.66880445  | 2.91250454  | 1.70055027  |
| C | 4.11508548  | 4.07077673  | 2.62901341  |
| H | 1.08481533  | -4.82751174 | 0.28509205  |
| H | -1.12058800 | -4.82045882 | -0.28166003 |
| H | -1.08468735 | 4.82674466  | 0.28325405  |
| H | 1.12070899  | 4.81933974  | -0.28393803 |
| H | 6.07342507  | -3.59046736 | -0.57787508 |
| H | 6.61265918  | -4.02284941 | 1.80633529  |

|   |             |             |             |
|---|-------------|-------------|-------------|
| H | 4.84126188  | -3.88195546 | 3.53882255  |
| H | 2.56797848  | -2.83821139 | -1.80211527 |
| H | -1.26514609 | -3.03379855 | -2.75552141 |
| H | 5.38442090  | -1.63224110 | -2.06255131 |
| H | 3.92447162  | -0.77519701 | -1.51787422 |
| H | 4.03214566  | -1.38128110 | -3.18690449 |
| H | 5.19177194  | -4.23889650 | -2.60951439 |
| H | 3.81205472  | -3.88994750 | -3.66517855 |
| H | 3.63979074  | -5.05359767 | -2.33191835 |
| H | -3.48578346 | -2.22378751 | -4.72414671 |
| H | -1.74340420 | -1.94932340 | -4.93091474 |
| H | -2.62518736 | -1.12702931 | -3.62290854 |
| H | -1.80913808 | -5.40809597 | -3.37024351 |
| H | -1.26288403 | -4.47135877 | -4.77865672 |
| H | -2.98597528 | -4.83452789 | -4.56767569 |
| H | -4.88223161 | -3.85476980 | -3.52855253 |
| H | -6.64878992 | -3.97235089 | -1.78954927 |
| H | -6.09687181 | -3.53714281 | 0.59144310  |
| H | 1.23840529  | -3.01253746 | 2.75077043  |
| H | -2.58125030 | -2.80647156 | 1.79978628  |
| H | 3.46097161  | -2.27207326 | 4.74474773  |
| H | 1.72387233  | -1.95761928 | 4.93633377  |
| H | 2.63859744  | -1.14516512 | 3.64489057  |
| H | 2.91280562  | -4.86909268 | 4.55007271  |
| H | 1.72602145  | -5.40341381 | 3.34435752  |
| H | 1.19735634  | -4.47022268 | 4.76173374  |
| H | -3.93589458 | -0.74129731 | 1.52046724  |
| H | -4.03538858 | -1.34602039 | 3.19049049  |
| H | -5.39421581 | -1.59536048 | 2.07388433  |
| H | -5.20371665 | -4.20298187 | 2.61863241  |
| H | -3.81975045 | -3.85500478 | 3.66928057  |
| H | -3.65361238 | -5.01950594 | 2.33599236  |
| H | -4.83575789 | 3.88306938  | 3.54164555  |
| H | -6.61035318 | 4.02241233  | 1.81230628  |
| H | -6.07552210 | 3.58785228  | -0.57251008 |
| H | -1.23530831 | 3.00864237  | 2.74799643  |
| H | 1.26506307  | 3.02065346  | -2.75681941 |
| H | -3.45425561 | 2.28476219  | 4.75213973  |
| H | -1.71773234 | 1.96475920  | 4.93879976  |
| H | -2.64011045 | 1.14999404  | 3.65429556  |
| H | -1.71351246 | 5.40355071  | 3.33158651  |
| H | -1.18564135 | 4.47557260  | 4.75267673  |
| H | -2.90019563 | 4.87906260  | 4.54174070  |
| H | 3.48587144  | 2.23964543  | -4.73712071 |
| H | 1.74507319  | 1.95247732  | -4.93870975 |
| H | 2.63854135  | 1.12941223  | -3.63915455 |
| H | 1.79041707  | 5.40231285  | -3.35717050 |
| H | 1.25062301  | 4.47134169  | -4.77184571 |
| H | 2.97125627  | 4.84558881  | -4.55860169 |
| H | 4.87901960  | 3.85320873  | -3.53294953 |
| H | 6.64670491  | 3.97434981  | -1.79527027 |
| H | 6.09707983  | 3.54003573  | 0.58639810  |



|    |             |             |             |
|----|-------------|-------------|-------------|
| H  | -2.57212750 | 2.83602730  | -1.80272227 |
| H  | 2.58304129  | 2.80657748  | 1.79781328  |
| H  | -5.38804788 | 1.62757601  | -2.05710331 |
| H  | -3.92660164 | 0.77235794  | -1.51358022 |
| H  | -4.03720868 | 1.37637902  | -3.18314947 |
| H  | -3.82133673 | 3.88511841  | -3.66430455 |
| H  | -3.64620875 | 5.05001060  | -2.33251535 |
| H  | -5.19856896 | 4.23447341  | -2.60547639 |
| H  | 3.93988157  | 0.74275622  | 1.51900924  |
| H  | 4.03934956  | 1.34869231  | 3.18859349  |
| H  | 5.39747776  | 1.59881740  | 2.07127733  |
| H  | 3.65332237  | 5.02122286  | 2.33172937  |
| H  | 5.20457263  | 4.20664179  | 2.61362441  |
| H  | 3.82188343  | 3.85789069  | 3.66572657  |
| O  | 1.36298627  | -1.51081922 | 0.16732303  |
| O  | -1.36346327 | 1.51015415  | 0.16377103  |
| Zr | -0.00004401 | -0.00041404 | -0.00617499 |

## 10.2 Structures with five oxygen atoms

### Oxo Complex (conformation 1 lower energy)

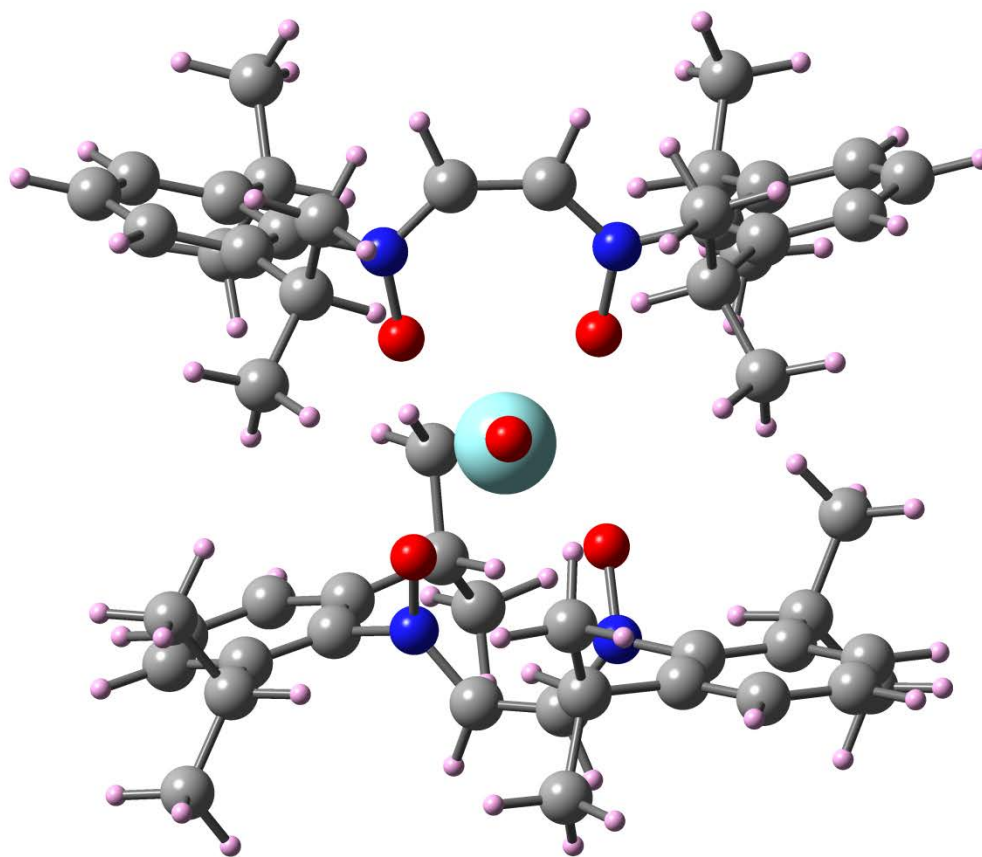

Fig. S131: ONCCNO Oxo Complex (conformation 1 lower energy)

| SCF          | E <sub>ZP</sub> | H            | G            |
|--------------|-----------------|--------------|--------------|
| -2666.284443 | -2665.133275    | -2665.062285 | -2665.250380 |

|   |             |             |             |
|---|-------------|-------------|-------------|
| N | -1.77126114 | -2.57797320 | -0.51624804 |
| N | 1.66161713  | 2.82103922  | 0.04463100  |
| C | -0.82563806 | -3.55987627 | -0.51543204 |
| C | 0.52443604  | -3.62592928 | -0.14897601 |
| C | 0.84816507  | 3.88530930  | 0.28803602  |
| C | -0.49120504 | 3.89629830  | 0.68940505  |
| C | -3.10797324 | -2.83025822 | -1.03235908 |
| C | -4.12587732 | -3.19540124 | -0.11591101 |
| C | -5.40995539 | -3.45396326 | -0.63836705 |
| C | -5.66265145 | -3.34390226 | -2.01569816 |
| C | -4.64008335 | -2.95465523 | -2.89535622 |
| C | -3.33985825 | -2.67463421 | -2.42214518 |
| C | -4.64373735 | -2.15290816 | 2.13233816  |
| C | -3.87165129 | -3.27689325 | 1.39139510  |

|   |             |             |             |
|---|-------------|-------------|-------------|
| C | -4.22826232 | -4.67116036 | 1.96687015  |
| C | 2.51227319  | -2.34942318 | 4.01356531  |
| C | 2.20062317  | -3.52621727 | 3.04956224  |
| C | 2.18094617  | -4.87755637 | 3.80677329  |
| C | 2.81070521  | -3.11233024 | 0.57854904  |
| C | 3.18940625  | -3.52595827 | 1.88111914  |
| C | 4.53443535  | -3.89939630 | 2.07948016  |
| C | 5.45787144  | -3.85582430 | 1.02151108  |
| C | 5.05822839  | -3.41870926 | -0.25091702 |
| C | 3.72613029  | -3.02269223 | -0.49975904 |
| C | -2.67975120 | -0.95853207 | -4.18482732 |
| C | -2.24571717 | -2.21816417 | -3.39245026 |
| C | -1.84452014 | -3.36410025 | -4.35871633 |
| C | 4.16436932  | -1.26480110 | -2.28452917 |
| C | 3.32265525  | -2.50364719 | -1.88348315 |
| C | 3.43585826  | -3.61832528 | -2.95668723 |
| C | 2.97215023  | 2.95139423  | -0.56016004 |
| C | 3.06408023  | 3.19037924  | -1.95705515 |
| C | 4.35783633  | 3.30450925  | -2.51086319 |
| C | 5.50378540  | 3.16183724  | -1.71491313 |
| C | 5.38177141  | 2.90716422  | -0.33872203 |
| C | 4.11548431  | 2.80146021  | 0.27033202  |
| C | 1.85171214  | 2.25747517  | -3.99885431 |
| C | 1.83971914  | 3.32131325  | -2.87003722 |
| C | 1.73699913  | 4.75731336  | -3.45099427 |
| C | -1.91128214 | 0.63380305  | 3.78900729  |
| C | -1.66490713 | 2.13484216  | 3.47409126  |
| C | -1.39476111 | 2.93695223  | 4.77155637  |
| C | -2.71765621 | 3.04151323  | 1.29605510  |
| C | -2.83532422 | 2.70796621  | 2.66920020  |
| C | -4.10211332 | 2.86495722  | 3.27045425  |
| C | -5.20266540 | 3.31855225  | 2.52625219  |
| C | -5.06223339 | 3.61395528  | 1.16024909  |
| C | -3.81673429 | 3.47748026  | 0.51298704  |
| C | 4.46960634  | 1.08776909  | 2.10443016  |
| C | 4.00862431  | 2.53202219  | 1.77410413  |
| C | 4.80226937  | 3.57444127  | 2.60329220  |
| C | -4.42021734 | 2.65838320  | -1.80219714 |
| C | -3.68696828 | 3.75678129  | -0.98617608 |
| C | -4.19988432 | 5.16930840  | -1.36499010 |
| H | -1.21589710 | -4.48973834 | -0.91589607 |
| H | 0.97721007  | -4.59716735 | -0.31961602 |
| H | 1.33197810  | 4.85010137  | 0.17248901  |
| H | -0.87820007 | 4.83802137  | 1.06620608  |
| H | -6.21515848 | -3.73929729 | 0.03410900  |
| H | -6.65826552 | -3.55173327 | -2.40139318 |
| H | -4.85433837 | -2.85546922 | -3.95638430 |
| H | -2.80529421 | -3.10386223 | 1.57078712  |
| H | 1.19534509  | -3.35237426 | 2.65045320  |
| H | -5.72901943 | -2.26405017 | 2.00508015  |
| H | -4.35312533 | -1.16750809 | 1.75067113  |
| H | -4.42378334 | -2.18566617 | 3.20799325  |

|   |             |             |             |
|---|-------------|-------------|-------------|
| H | -5.29820840 | -4.89203937 | 1.85829514  |
| H | -3.98757031 | -4.71169636 | 3.03758123  |
| H | -3.66766528 | -5.46768641 | 1.46056611  |
| H | 3.51345227  | -2.45251819 | 4.45376134  |
| H | 1.78141814  | -2.32449118 | 4.83333137  |
| H | 2.46576619  | -1.39432011 | 3.47855627  |
| H | 1.95551615  | -5.71233341 | 3.13051124  |
| H | 1.41417511  | -4.85781437 | 4.59253435  |
| H | 3.14394824  | -5.08683439 | 4.29061533  |
| H | 4.86169237  | -4.22481032 | 3.06363723  |
| H | 6.49016147  | -4.15329232 | 1.19204509  |
| H | 5.78716442  | -3.37237626 | -1.05583708 |
| H | -1.35543710 | -1.93216014 | -2.82346921 |
| H | 2.27960417  | -2.17289417 | -1.85394214 |
| H | -3.52801127 | -1.16560409 | -4.85173737 |
| H | -1.84186914 | -0.60247705 | -4.79657637 |
| H | -2.96507722 | -0.14724601 | -3.50464027 |
| H | -2.69248121 | -3.67675228 | -4.98347238 |
| H | -1.48855511 | -4.24581232 | -3.80942629 |
| H | -1.03752408 | -3.03015323 | -5.02356438 |
| H | 4.07046931  | -0.46644204 | -1.53922912 |
| H | 3.80653029  | -0.86909206 | -3.24301225 |
| H | 5.22934140  | -1.51286612 | -2.39244018 |
| H | 4.47104834  | -3.97057030 | -3.06288224 |
| H | 3.10754124  | -3.23529525 | -3.93148630 |
| H | 2.81043921  | -4.48485634 | -2.70387021 |
| H | 4.46550934  | 3.49122727  | -3.57616728 |
| H | 6.49023249  | 3.24397825  | -2.16576817 |
| H | 6.27723949  | 2.79703221  | 0.26759602  |
| H | 0.93730707  | 3.13508624  | -2.27934017 |
| H | -0.75892206 | 2.19137317  | 2.86100522  |
| H | 2.76159721  | 2.32272018  | -4.61096035 |
| H | 0.98880508  | 2.41146618  | -4.66114536 |
| H | 1.76645814  | 1.25147209  | -3.57384427 |
| H | 1.69576913  | 5.51362841  | -2.65548820 |
| H | 0.82977906  | 4.85384437  | -4.06173131 |
| H | 2.59866420  | 4.99099238  | -4.09045031 |
| H | -2.79560622 | 0.50335004  | 4.42742034  |
| H | -1.04536808 | 0.21071802  | 4.31547733  |
| H | -2.06963316 | 0.05549400  | 2.87040622  |
| H | -1.20025709 | 3.99502031  | 4.55371935  |
| H | -0.51782204 | 2.52852419  | 5.29068541  |
| H | -2.24429117 | 2.88654622  | 5.46533040  |
| H | -4.23042333 | 2.62198620  | 4.32217833  |
| H | -6.17147648 | 3.43190126  | 3.00747223  |
| H | -5.92638344 | 3.95063730  | 0.59341704  |
| H | 2.95620622  | 2.60264220  | 2.06577016  |
| H | -2.62784320 | 3.69963228  | -1.25896009 |
| H | 5.51928542  | 0.93020507  | 1.82126714  |
| H | 3.85221529  | 0.35603903  | 1.57258512  |
| H | 4.37775834  | 0.89697407  | 3.18244024  |
| H | 4.65075735  | 3.39450526  | 3.67605928  |

|    |             |             |             |
|----|-------------|-------------|-------------|
| H  | 4.47511634  | 4.59824535  | 2.37884918  |
| H  | 5.88095246  | 3.51592927  | 2.40733218  |
| H  | -4.01816931 | 1.66804813  | -1.56111912 |
| H  | -4.28692633 | 2.83254522  | -2.87825022 |
| H  | -5.49795741 | 2.65628120  | -1.58906712 |
| H  | -3.67503428 | 5.95178146  | -0.80134906 |
| H  | -5.27477240 | 5.27764540  | -1.16930709 |
| H  | -4.03850731 | 5.35312043  | -2.43534119 |
| O  | 0.45139103  | -0.15688401 | -2.02657916 |
| O  | -1.28533310 | 1.78076714  | -0.15017101 |
| O  | 1.11176608  | -1.44083211 | 0.74616006  |
| N  | -1.42152111 | 2.89812422  | 0.65865705  |
| N  | 1.42573411  | -2.73359421 | 0.34983903  |
| O  | -1.58999712 | -1.30883110 | 0.01144900  |
| O  | 1.35376110  | 1.56133812  | 0.55925604  |
| Zr | 0.02331700  | 0.07988501  | -0.27726002 |

**Oxo Complex (conformation 2 higher energy)**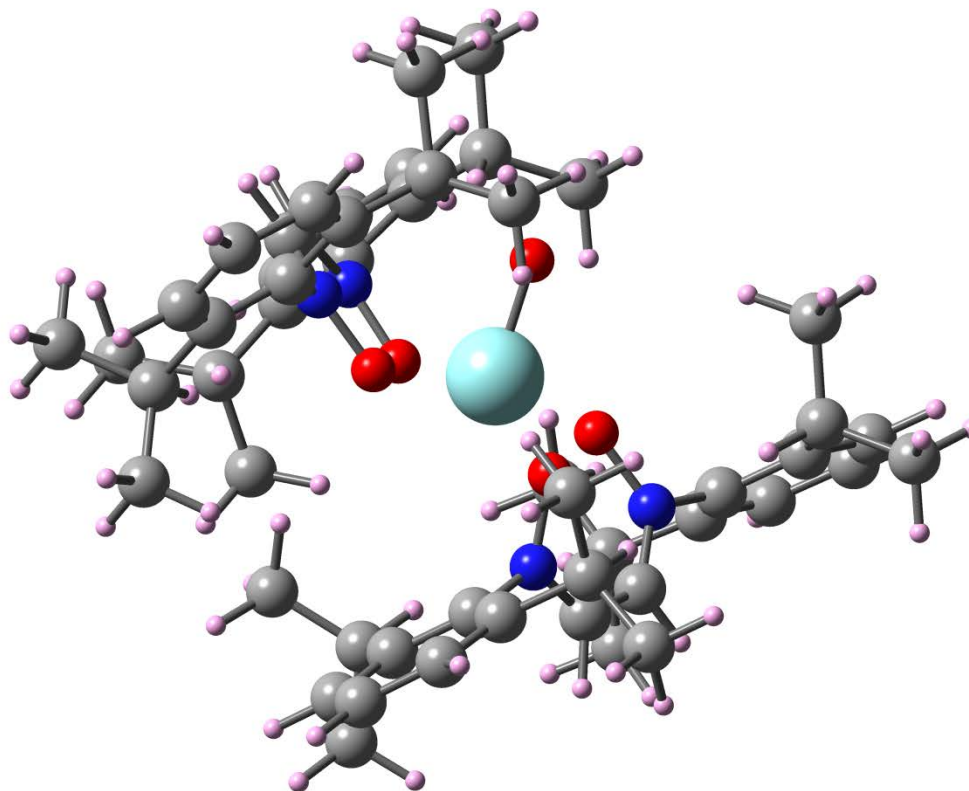

Fig. S132: ONCCNO Oxo Complex (conformation 2 higher energy)

| SCF          | $E_{ZP}$     | H            | G            |
|--------------|--------------|--------------|--------------|
| -2666.253850 | -2665.102393 | -2665.031645 | -2665.215720 |

|    |             |             |             |
|----|-------------|-------------|-------------|
| Zr | -0.10506125 | -0.14509464 | -0.65119304 |
| O  | -2.01309581 | -0.98920312 | -0.34416869 |
| O  | 1.94756449  | 0.43564589  | -0.21543680 |
| N  | -0.30734438 | 2.94582662  | -0.00491646 |
| N  | 2.60948920  | 1.52899055  | -0.73999659 |
| N  | 0.35989761  | -2.75086099 | 0.91853701  |
| N  | -2.71071386 | -2.05693126 | 0.17396591  |
| C  | 0.85835072  | 3.37885927  | -0.55865950 |
| C  | 2.09216598  | 2.77886055  | -0.86324487 |
| C  | -0.83903542 | -3.23211564 | 1.39034644  |
| C  | -2.15792417 | -2.98022194 | 1.01479841  |
| C  | -1.42904925 | 3.85550042  | 0.17713966  |
| C  | -2.32877143 | 4.04871346  | -0.90153932 |
| C  | -3.40262769 | 4.94124001  | -0.69162420 |
| C  | -3.57683795 | 5.58915423  | 0.54096008  |
| C  | -2.68392816 | 5.35333263  | 1.59978895  |

|   |             |             |             |
|---|-------------|-------------|-------------|
| C | -1.59045056 | 4.47764747  | 1.44141521  |
| C | -3.39913795 | 2.36474166  | -2.46837776 |
| C | -2.19179491 | 3.31207428  | -2.23756099 |
| C | -2.03362616 | 4.30186016  | -3.42056714 |
| C | 3.05876244  | -0.69886395 | -4.14412831 |
| C | 3.07684412  | 0.72221806  | -3.52535698 |
| C | 3.18247886  | 1.80125708  | -4.63572851 |
| C | 3.98015651  | 1.25913199  | -1.15996604 |
| C | 4.20889545  | 0.87371164  | -2.50556779 |
| C | 5.54647222  | 0.63739228  | -2.88993586 |
| C | 6.59948515  | 0.76615648  | -1.97103774 |
| C | 6.33753559  | 1.13052044  | -0.64056739 |
| C | 5.01955180  | 1.37845626  | -0.20381066 |
| C | -1.36564641 | 3.25755621  | 3.64335629  |
| C | -0.65465859 | 4.17960784  | 2.61551805  |
| C | -0.12357936 | 5.46603167  | 3.29488774  |
| C | 5.29707543  | 0.70039185  | 2.23427466  |
| C | 4.75378168  | 1.76992297  | 1.25225338  |
| C | 5.34785094  | 3.16723598  | 1.57353038  |
| C | 1.60030415  | -3.07541348 | 1.59273429  |
| C | 1.89788198  | -2.44096432 | 2.82953719  |
| C | 3.10972018  | -2.78099893 | 3.46668513  |
| C | 3.99859371  | -3.70082398 | 2.89027142  |
| C | 3.68441755  | -4.30878755 | 1.66404817  |
| C | 2.47931420  | -4.01894780 | 0.99295225  |
| C | 1.69279172  | -0.00816176 | 3.53804829  |
| C | 0.98603506  | -1.38739893 | 3.46965938  |
| C | 0.49493805  | -1.83086445 | 4.87228482  |
| C | -3.23907213 | -2.35006310 | -3.56831105 |
| C | -3.45750165 | -3.29350553 | -2.35350668 |
| C | -3.83535180 | -4.72227302 | -2.81745485 |
| C | -4.11790969 | -2.07644787 | -0.17834070 |
| C | -4.49363368 | -2.69532972 | -1.39868235 |
| C | -5.86380791 | -2.69482446 | -1.73322638 |
| C | -6.81356137 | -2.09793140 | -0.88800045 |
| C | -6.41070238 | -1.47507204 | 0.30391766  |
| C | -5.05112521 | -1.44240524 | 0.68015756  |
| C | 3.11560194  | -4.24293245 | -1.44981976 |
| C | 2.15589212  | -4.72087241 | -0.32891811 |
| C | 2.19336408  | -6.26429354 | -0.18442796 |
| C | -4.88328774 | 0.81186342  | 1.83121558  |
| C | -4.62297377 | -0.71269701 | 1.95621085  |
| C | -5.31768535 | -1.29365233 | 3.21473301  |
| H | 0.80518697  | 4.42788286  | -0.82914101 |
| H | 2.80404384  | 3.46285490  | -1.31306700 |
| H | -0.71909335 | -3.93416654 | 2.20958790  |
| H | -2.90296097 | -3.61561191 | 1.48327547  |
| H | -4.11027482 | 5.12026035  | -1.49691398 |
| H | -4.41332170 | 6.27021641  | 0.68065087  |
| H | -2.83969616 | 5.85167314  | 2.55311382  |
| H | -1.30175918 | 2.67507817  | -2.21799836 |
| H | 2.11111282  | 0.85227079  | -3.02722634 |

|   |             |             |             |
|---|-------------|-------------|-------------|
| H | -4.34455321 | 2.92105711  | -2.53477035 |
| H | -3.48403182 | 1.63161962  | -1.65766679 |
| H | -3.25792283 | 1.80998418  | -3.40401785 |
| H | -2.92478790 | 4.93210543  | -3.54509513 |
| H | -1.88294042 | 3.74387096  | -4.35330598 |
| H | -1.16970598 | 4.96477105  | -3.27816026 |
| H | 3.96057219  | -0.90052790 | -4.73910230 |
| H | 2.18514558  | -0.80178127 | -4.79929529 |
| H | 2.98326184  | -1.46497561 | -3.36333963 |
| H | 3.15590581  | 2.81523101  | -4.21436940 |
| H | 2.33975056  | 1.70301844  | -5.33180602 |
| H | 4.11363305  | 1.69977855  | -5.21036345 |
| H | 5.76113879  | 0.34461931  | -3.91446425 |
| H | 7.62249601  | 0.57875590  | -2.28952752 |
| H | 7.16117658  | 1.21925864  | 0.06339626  |
| H | 0.20998944  | 3.62481587  | 2.23446259  |
| H | 3.67012783  | 1.82553914  | 1.40228824  |
| H | -2.25012120 | 3.74936636  | 4.07032782  |
| H | -0.68410941 | 3.00931969  | 4.46837937  |
| H | -1.68561503 | 2.32532497  | 3.16375075  |
| H | -0.93160277 | 6.04398361  | 3.76167297  |
| H | 0.38403781  | 6.11906042  | 2.57340412  |
| H | 0.59377339  | 5.20581196  | 4.08443606  |
| H | 4.85610748  | -0.28177980 | 2.02909556  |
| H | 5.05163774  | 0.97837255  | 3.26809592  |
| H | 6.38888361  | 0.60721654  | 2.16407450  |
| H | 6.43942004  | 3.17140212  | 1.45492112  |
| H | 5.12029424  | 3.45025267  | 2.61002961  |
| H | 4.93559055  | 3.93906239  | 0.91074008  |
| H | 3.36585183  | -2.31074499 | 4.41296302  |
| H | 4.93228927  | -3.94210674 | 3.39311079  |
| H | 4.37781735  | -5.02389633 | 1.22867107  |
| H | 0.09843209  | -1.26206342 | 2.84084502  |
| H | -2.49960802 | -3.35972747 | -1.82601021 |
| H | 2.57731635  | -0.04481613 | 4.18767222  |
| H | 1.00582153  | 0.74774699  | 3.94190584  |
| H | 2.01113588  | 0.31322546  | 2.53961831  |
| H | -0.03834394 | -2.78935466 | 4.82688944  |
| H | -0.18727758 | -1.07938816 | 5.29160611  |
| H | 1.33371045  | -1.94782311 | 5.57084078  |
| H | -4.17068509 | -2.21443338 | -4.13514261 |
| H | -2.48553143 | -2.77374970 | -4.24527646 |
| H | -2.88199702 | -1.36777986 | -3.24054529 |
| H | -3.99237314 | -5.39354349 | -1.96299253 |
| H | -3.02927468 | -5.13864995 | -3.43554429 |
| H | -4.75054393 | -4.72702586 | -3.42407428 |
| H | -6.18887996 | -3.15979507 | -2.66013538 |
| H | -7.86588553 | -2.11040659 | -1.16301902 |
| H | -7.15521604 | -1.00350471 | 0.94068845  |
| H | 1.14642495  | -4.43408999 | -0.63609052 |
| H | -3.54258056 | -0.84300310 | 2.08270597  |
| H | 4.15954428  | -4.49769584 | -1.22035679 |



|   |             |             |             |
|---|-------------|-------------|-------------|
| H | 3.04324654  | -3.15730229 | -1.57422836 |
| H | 2.85216332  | -4.71867319 | -2.40405082 |
| H | 1.89573681  | -6.73544338 | -1.13072031 |
| H | 1.50671168  | -6.61021242 | 0.59939168  |
| H | 3.19910743  | -6.62814571 | 0.06449358  |
| H | -4.34669454 | 1.23053326  | 0.97221785  |
| H | -4.53839418 | 1.33220712  | 2.73483394  |
| H | -5.95319293 | 1.02533399  | 1.70567567  |
| H | -5.11799691 | -2.36772849 | 3.32383641  |
| H | -6.40632080 | -1.15857373 | 3.17184704  |
| H | -4.95463461 | -0.78483385 | 4.11760548  |
| O | -0.11516071 | 0.40349957  | -2.38050833 |
| O | -0.55139128 | 1.65765468  | 0.42529420  |
| O | 0.49270791  | -2.21639314 | -0.37454196 |

### 10.3 Structures with six oxygen atoms

#### Dioxo Complex (conformation 1 lower energy)

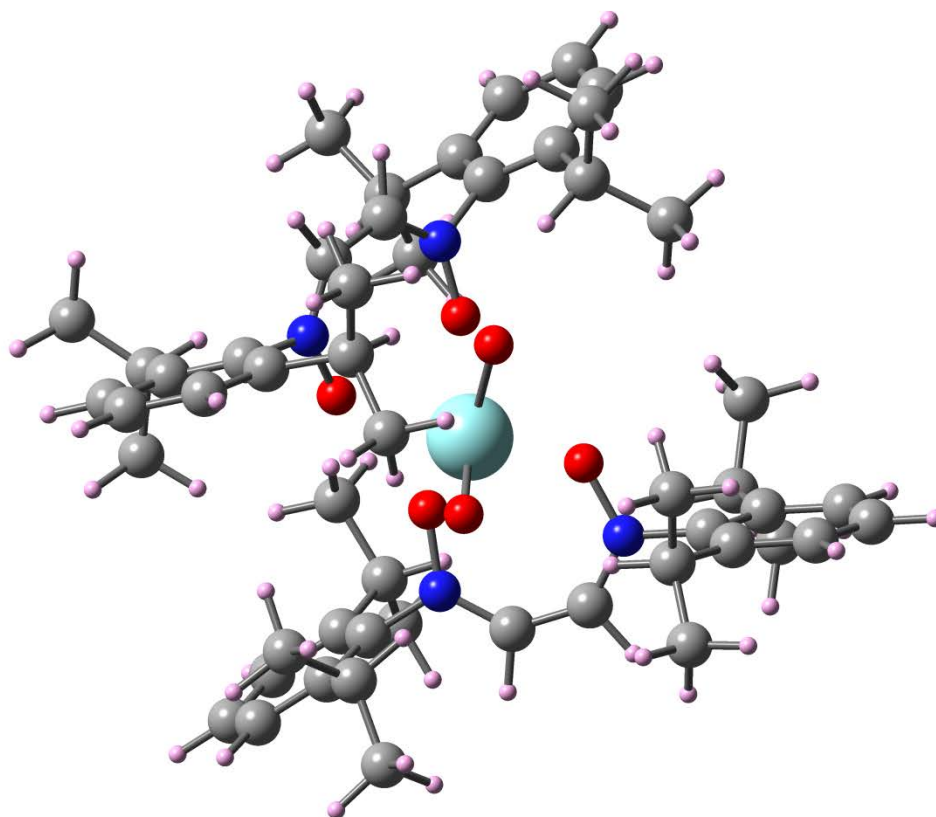

Fig. S133: ONCCNO Dioxo Complex (conformation 1 lower energy)

| SCF          | E <sub>ZP</sub> | H            | G            |
|--------------|-----------------|--------------|--------------|
| -2741.425103 | -2740.271282    | -2740.198744 | -2740.388059 |

|   |             |             |             |
|---|-------------|-------------|-------------|
| O | -0.17049575 | 1.83097313  | 0.77831904  |
| O | -2.17980824 | -0.47744676 | -0.23871104 |
| O | -0.15017880 | 1.48706910  | -1.93868817 |
| N | -0.16865042 | -2.77606323 | 1.17260407  |
| N | -2.91046547 | -1.65257074 | -0.32887005 |
| N | 2.75967942  | 1.44580967  | -0.76221908 |
| N | 0.28692847  | 3.06871315  | 0.61959702  |
| C | -1.35436459 | -3.33505210 | 0.79579203  |
| C | -2.51014961 | -2.85761189 | 0.16263899  |
| C | 2.45684758  | 2.73644781  | -0.67272308 |
| C | 1.40349360  | 3.44681302  | -0.00845102 |
| C | 0.87949254  | -3.59714644 | 1.76018611  |
| C | 1.73755350  | -4.32442062 | 0.89825204  |
| C | 2.73408046  | -5.12290383 | 1.50160009  |

|   |             |             |             |
|---|-------------|-------------|-------------|
| C | 2.88132746  | -5.16650685 | 2.89659320  |
| C | 2.03638651  | -4.40615967 | 3.72301926  |
| C | 1.01620655  | -3.60412146 | 3.17198322  |
| C | 2.95256667  | -3.81050976 | -1.28006712 |
| C | 1.62032650  | -4.26025360 | -0.62809007 |
| C | 1.15462327  | -5.62127164 | -1.20935411 |
| C | -2.82028533 | -0.76431069 | -4.20118735 |
| C | -3.11096452 | -1.94737074 | -3.24043927 |
| C | -3.29935273 | -3.26919581 | -4.02835933 |
| C | -4.21503654 | -1.48781354 | -0.94929210 |
| C | -4.32144557 | -1.64193653 | -2.35410520 |
| C | -5.60006264 | -1.47484634 | -2.92853825 |
| C | -6.71328366 | -1.15214815 | -2.13652519 |
| C | -6.57040464 | -0.97732416 | -0.75008408 |
| C | -5.31510360 | -1.13545435 | -0.12682203 |
| C | 0.91423985  | -1.47715228 | 4.53125332  |
| C | 0.13082761  | -2.73646027 | 4.07013829  |
| C | -0.43803155 | -3.51466025 | 5.28198238  |
| C | -5.32646233 | 0.62906678  | 1.68858711  |
| C | -5.15881253 | -0.88181636 | 1.37496208  |
| C | -6.13618470 | -1.73846728 | 2.21881614  |
| C | 3.96695745  | 1.02194146  | -1.49341514 |
| C | 3.92334243  | 0.94838546  | -2.90612124 |
| C | 5.10327446  | 0.51178426  | -3.54950729 |
| C | 6.24447548  | 0.15626906  | -2.81674024 |
| C | 6.23817753  | 0.22357907  | -1.41335113 |
| C | 5.09400648  | 0.65636527  | -0.71432808 |
| C | 2.17474817  | 0.03513165  | -4.50587537 |
| C | 2.68402639  | 1.28678467  | -3.74174031 |
| C | 2.97308758  | 2.45999072  | -4.71543838 |
| C | -0.16224263 | 2.67067319  | 4.39434331  |
| C | 0.58792458  | 3.66966815  | 3.47161624  |
| C | 1.47510379  | 4.63509310  | 4.29636730  |
| C | -0.57697345 | 4.11329036  | 1.20637507  |
| C | -0.41136639 | 4.41249236  | 2.57941617  |
| C | -1.26053031 | 5.39960156  | 3.12042721  |
| C | -2.22533730 | 6.03808974  | 2.32332515  |
| C | -2.37429236 | 5.69128173  | 0.97160005  |
| C | -1.55690243 | 4.70546755  | 0.37630700  |
| C | 5.00248427  | -0.75629583 | 1.38492008  |
| C | 5.08836049  | 0.68628727  | 0.81758604  |
| C | 6.31254567  | 1.44246015  | 1.39289408  |
| C | -3.18225171 | 3.68535870  | -1.28199512 |
| C | -1.77242051 | 4.30277154  | -1.08631811 |
| C | -1.55432932 | 5.50509363  | -2.04133618 |
| H | -1.38776175 | -4.39601617 | 1.02068805  |
| H | -3.26459978 | -3.62131484 | 0.00231998  |
| H | 3.16598973  | 3.37987076  | -1.18159112 |
| H | 1.52278577  | 4.52405209  | -0.03474503 |
| H | 3.40388743  | -5.70360495 | 0.87254704  |
| H | 3.65794543  | -5.78579501 | 3.34025323  |
| H | 2.16914252  | -4.43958969 | 4.80126735  |

|   |             |             |             |
|---|-------------|-------------|-------------|
| H | 0.87856955  | -3.50404244 | -0.90374409 |
| H | -2.22102347 | -2.05989588 | -2.61366722 |
| H | 3.76319662  | -4.53131193 | -1.10299111 |
| H | 3.26379783  | -2.83325973 | -0.89291209 |
| H | 2.81447967  | -3.70863974 | -2.36344820 |
| H | 1.87995621  | -6.41874583 | -0.99627610 |
| H | 1.04277327  | -5.54510059 | -2.29856820 |
| H | 0.18680215  | -5.92663051 | -0.78979009 |
| H | -3.65871136 | -0.58580055 | -4.88942940 |
| H | -1.92434429 | -0.98349584 | -4.79502739 |
| H | -2.62691118 | 0.15592835  | -3.63809030 |
| H | -3.47955587 | -4.11603385 | -3.35272228 |
| H | -2.39508569 | -3.48588196 | -4.61136237 |
| H | -4.14487779 | -3.21041168 | -4.72757839 |
| H | -5.72121068 | -1.59101233 | -4.00256233 |
| H | -7.68959875 | -1.02702300 | -2.59976822 |
| H | -7.43744770 | -0.70999301 | -0.15108204 |
| H | -0.71683340 | -2.37981212 | 3.47469224  |
| H | -4.13916249 | -1.15461053 | 1.66732010  |
| H | 1.79403288  | -1.75595643 | 5.12783237  |
| H | 0.27174990  | -0.83443515 | 5.14884737  |
| H | 1.24606296  | -0.90144529 | 3.66043425  |
| H | 0.35452847  | -3.83195939 | 5.97250145  |
| H | -0.98572672 | -4.41057623 | 4.96212935  |
| H | -1.12886551 | -2.87496210 | 5.84722741  |
| H | -4.59130717 | 1.22075272  | 1.13107506  |
| H | -5.17478028 | 0.81443878  | 2.76053518  |
| H | -6.33111037 | 0.98368996  | 1.42103108  |
| H | -7.18348675 | -1.48232111 | 2.01120513  |
| H | -5.95942167 | -1.56939629 | 3.28943123  |
| H | -6.00594386 | -2.80941438 | 2.01584813  |
| H | 5.11682645  | 0.43961025  | -4.63337338 |
| H | 7.13739552  | -0.18201709 | -3.33710628 |
| H | 7.12676054  | -0.06378608 | -0.85824209 |
| H | 1.86297037  | 1.59370581  | -3.08495126 |
| H | 1.25481254  | 3.07354401  | 2.83748919  |
| H | 2.95112917  | -0.38777050 | -5.15874142 |
| H | 1.31794714  | 0.31468879  | -5.13273842 |
| H | 1.82948103  | -0.73314136 | -3.80479232 |
| H | 3.32087774  | 3.35674273  | -4.18328434 |
| H | 2.05725355  | 2.72224387  | -5.25987943 |
| H | 3.73897860  | 2.19310559  | -5.45600545 |
| H | -0.84612260 | 3.19914533  | 5.07196436  |
| H | 0.55504935  | 2.10617904  | 5.00431736  |
| H | -0.74387077 | 1.95664522  | 3.80078426  |
| H | 2.01410093  | 5.33926610  | 3.64918525  |
| H | 2.21472176  | 4.06417695  | 4.87256835  |
| H | 0.88342482  | 5.22131323  | 5.01108036  |
| H | -1.16994027 | 5.66532956  | 4.17003129  |
| H | -2.86885123 | 6.79794091  | 2.76027219  |
| H | -3.13818634 | 6.17873087  | 0.37216700  |
| H | 4.18855649  | 1.21097744  | 1.15917906  |

|    |             |             |             |
|----|-------------|-------------|-------------|
| H  | -1.05859957 | 3.52130438  | -1.37093513 |
| H  | 5.86802222  | -1.35643100 | 1.07378006  |
| H  | 4.09073013  | -1.25325973 | 1.03781806  |
| H  | 4.98223127  | -0.73163582 | 2.48244416  |
| H  | 6.23205670  | 1.50709817  | 2.48587816  |
| H  | 6.38178782  | 2.46272022  | 0.99303205  |
| H  | 7.25360369  | 0.92679998  | 1.16336807  |
| H  | -3.31043585 | 2.79794266  | -0.65166408 |
| H  | -3.30564776 | 3.37266770  | -2.32600020 |
| H  | -3.97884567 | 4.40282087  | -1.04161710 |
| H  | -0.54916218 | 5.93383050  | -1.92909417 |
| H  | -2.28303926 | 6.30642780  | -1.85882117 |
| H  | -1.66829738 | 5.17716160  | -3.08206426 |
| O  | 0.21303582  | -1.35098617 | -1.99666218 |
| O  | 2.08339022  | 0.45004869  | -0.16537204 |
| O  | 0.12983280  | -1.43074417 | 1.10118406  |
| Zr | -0.12009203 | -0.11876803 | -0.65927207 |

**Dioxo Complex (conformation 2 higher energy)**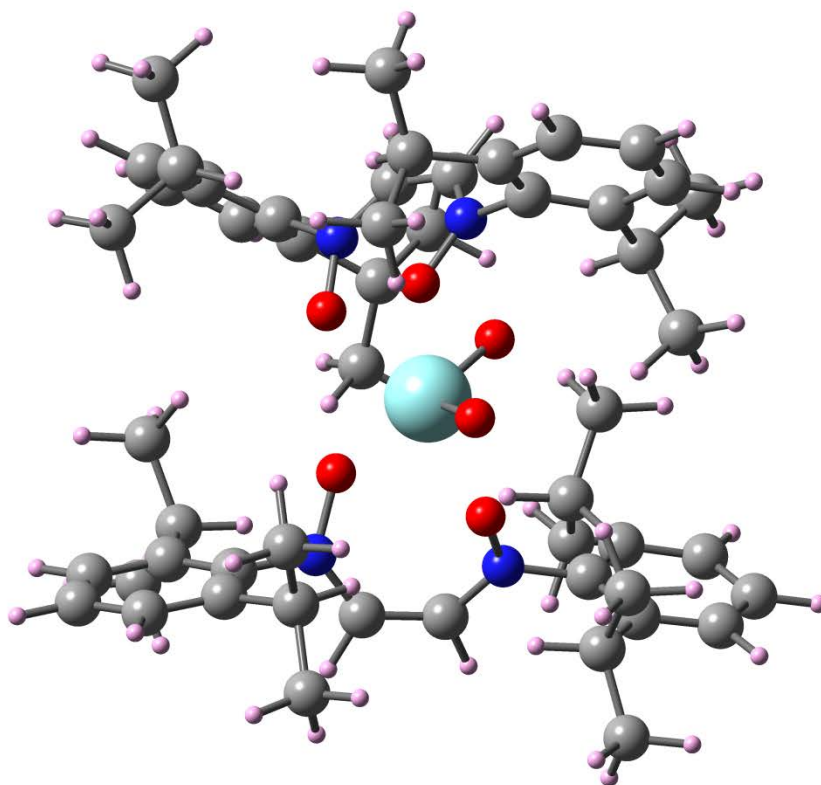

Fig. S134: ONCCNO Dioxo Complex (conformation 2 higher energy)

| SCF          | $E_{ZP}$     | H            | G            |
|--------------|--------------|--------------|--------------|
| -2741.413097 | -2740.257865 | -2740.187035 | -2740.370078 |

|    |             |             |             |
|----|-------------|-------------|-------------|
| Zr | -0.26356202 | 0.31901302  | -0.32105802 |
| O  | -0.27915602 | -1.86806514 | -0.35237803 |
| O  | 1.33113810  | 1.95761215  | -1.06641808 |
| O  | -0.95556807 | 1.57256012  | -1.85178914 |
| N  | 2.70495621  | 0.16357001  | 1.09641308  |
| N  | 1.66695513  | 2.92614523  | -0.19698702 |
| N  | -3.21696825 | -0.90791607 | 0.32018302  |
| N  | -1.10479408 | -2.81878222 | -0.94538207 |
| C  | 2.82242822  | 1.44414711  | 1.45374411  |
| C  | 2.30946617  | 2.67723820  | 0.93561007  |
| C  | -3.26870625 | -2.25981217 | 0.17412801  |
| C  | -2.37224618 | -3.08482024 | -0.50921704 |
| C  | 3.53866227  | -0.82995306 | 1.80086314  |
| C  | 3.03276623  | -1.39124610 | 2.99513523  |
| C  | 3.85776629  | -2.33116818 | 3.64999228  |
| C  | 5.10519139  | -2.69508720 | 3.11927624  |

|   |             |             |             |
|---|-------------|-------------|-------------|
| C | 5.55554041  | -2.13643216 | 1.91180215  |
| C | 4.77642436  | -1.18827909 | 1.21671109  |
| C | 0.73426706  | -2.28879717 | 3.55416827  |
| C | 1.65399812  | -1.03885408 | 3.56281027  |
| C | 1.76948514  | -0.43981603 | 4.98847938  |
| C | -2.04559416 | 4.26077432  | 0.62292105  |
| C | -0.58579504 | 4.35537433  | 1.14351609  |
| C | -0.51609004 | 5.12797639  | 2.48531719  |
| C | 1.34669311  | 4.30605633  | -0.59500105 |
| C | 0.30693902  | 4.99402138  | 0.07525101  |
| C | 0.06461000  | 6.32403447  | -0.33581103 |
| C | 0.80304106  | 6.91300251  | -1.37119810 |
| C | 1.80154214  | 6.18181147  | -2.03683916 |
| C | 2.09649216  | 4.85501637  | -1.66765713 |
| C | 5.21481540  | -1.74037713 | -1.21460409 |
| C | 5.25161340  | -0.63135305 | -0.12870601 |
| C | 6.65955651  | 0.00866800  | -0.02983700 |
| C | 2.53579319  | 3.54581527  | -3.77917729 |
| C | 3.14528824  | 4.05018931  | -2.44159319 |
| C | 4.45152834  | 4.84483237  | -2.68659020 |
| C | -4.25175033 | -0.15538501 | 1.00764208  |
| C | -5.24676240 | 0.48233404  | 0.21730602  |
| C | -6.23646247 | 1.22470709  | 0.89225807  |
| C | -6.24028149 | 1.32219710  | 2.29370318  |
| C | -5.24263740 | 0.68710306  | 3.04686423  |
| C | -4.21869832 | -0.05725000 | 2.42066619  |
| C | -4.78011636 | 1.74860413  | -1.92618415 |
| C | -5.25523140 | 0.40397303  | -1.31240110 |
| C | -6.64275052 | -0.00625300 | -1.86853114 |
| C | 2.08650516  | -4.58186235 | 0.39576803  |
| C | 0.62979305  | -4.97404438 | 0.03257600  |
| C | 0.32119302  | -6.43344949 | 0.45250503  |
| C | -0.44767803 | -3.67301228 | -1.91712414 |
| C | 0.37471103  | -4.73296236 | -1.45697411 |
| C | 0.98815708  | -5.55186745 | -2.42758219 |
| C | 0.79325306  | -5.31644342 | -3.79883029 |
| C | -0.00759600 | -4.24588632 | -4.22626632 |
| C | -0.63834505 | -3.39369926 | -3.29458125 |
| C | -2.28517917 | 0.41101203  | 3.99130130  |
| C | -3.11655124 | -0.68782805 | 3.27669125  |
| C | -3.70030828 | -1.70682013 | 4.29056433  |
| C | -0.59761104 | -1.22084009 | -4.61435635 |
| C | -1.46592311 | -2.20047217 | -3.78156629 |
| C | -2.70517321 | -2.66406220 | -4.59076835 |
| H | 3.48015327  | 1.57350612  | 2.30663518  |
| H | 2.53852719  | 3.55464027  | 1.52865912  |
| H | -4.15311632 | -2.72559321 | 0.59632305  |
| H | -2.71739121 | -4.08668431 | -0.74791606 |
| H | 3.51516927  | -2.78463721 | 4.57611135  |
| H | 5.72307243  | -3.42213326 | 3.64087728  |
| H | 6.51532649  | -2.44154019 | 1.50366811  |
| H | 1.16782909  | -0.29087102 | 2.92557922  |

|   |             |             |             |
|---|-------------|-------------|-------------|
| H | -0.27445702 | 3.32218725  | 1.33122610  |
| H | 1.14276709  | -3.09800724 | 4.17510832  |
| H | 0.60216505  | -2.66218021 | 2.53256619  |
| H | -0.25436902 | -2.02429415 | 3.94809030  |
| H | 2.18932317  | -1.16257909 | 5.70109543  |
| H | 0.77682206  | -0.14649101 | 5.35119439  |
| H | 2.40856818  | 0.45343703  | 5.00017938  |
| H | -2.47692319 | 5.25371840  | 0.43251803  |
| H | -2.66974520 | 3.75133929  | 1.36756911  |
| H | -2.08241416 | 3.67625528  | -0.30326002 |
| H | 0.51163704  | 5.18198539  | 2.87214722  |
| H | -1.13297009 | 4.61809935  | 3.23602925  |
| H | -0.88977007 | 6.15641748  | 2.38694118  |
| H | -0.72481906 | 6.89056153  | 0.15008901  |
| H | 0.59240104  | 7.93667161  | -1.67181413 |
| H | 2.35316618  | 6.64539450  | -2.84947622 |
| H | 4.55616235  | 0.15063501  | -0.45489603 |
| H | 3.40825226  | 3.15862724  | -1.85971514 |
| H | 5.90104447  | -2.56147020 | -0.96819207 |
| H | 5.51420241  | -1.32838410 | -2.18714417 |
| H | 4.20522032  | -2.15475216 | -1.31417510 |
| H | 7.42280356  | -0.73247206 | 0.23969102  |
| H | 6.68656852  | 0.80692306  | 0.72335206  |
| H | 6.94549653  | 0.44102403  | -0.99742708 |
| H | 1.64343513  | 2.94086822  | -3.58862427 |
| H | 3.26698225  | 2.93080622  | -4.32114133 |
| H | 2.25491117  | 4.38954134  | -4.42392634 |
| H | 4.28902933  | 5.70297041  | -3.35102425 |
| H | 5.19552540  | 4.19698832  | -3.16850924 |
| H | 4.88002037  | 5.22045440  | -1.74805314 |
| H | -7.01165951 | 1.72612613  | 0.31908402  |
| H | -7.01574952 | 1.89706415  | 2.79515721  |
| H | -5.24805640 | 0.77899506  | 4.13006832  |
| H | -4.53170734 | -0.35553103 | -1.62587813 |
| H | -0.03046600 | -4.31381633 | 0.60540905  |
| H | -5.43119942 | 2.57757920  | -1.61487212 |
| H | -4.80143237 | 1.69234313  | -3.02310423 |
| H | -3.75214129 | 1.96655315  | -1.61942912 |
| H | -6.98826554 | -0.95344207 | -1.43310911 |
| H | -6.58432152 | -0.13159101 | -2.95790523 |
| H | -7.40684654 | 0.75603206  | -1.66695912 |
| H | 2.81138821  | -5.18936539 | -0.16328901 |
| H | 2.26933417  | -4.73674036 | 1.46753211  |
| H | 2.26407817  | -3.52528127 | 0.16723701  |
| H | -0.71025405 | -6.71386052 | 0.20170202  |
| H | 0.45229703  | -6.54917352 | 1.53665412  |
| H | 0.99271008  | -7.14905356 | -0.03997600 |
| H | 1.62143612  | -6.37669751 | -2.11061516 |
| H | 1.27202710  | -5.96143243 | -4.53236235 |
| H | -0.13679701 | -4.06267331 | -5.29009541 |
| H | -2.42841319 | -1.22864709 | 2.61836020  |
| H | -1.83041714 | -1.64576513 | -2.91102922 |



|   |             |             |             |
|---|-------------|-------------|-------------|
| H | -2.92590822 | 1.07052908  | 4.59218135  |
| H | -1.73326013 | 1.00660008  | 3.25474325  |
| H | -1.55439812 | -0.05227900 | 4.66897036  |
| H | -2.88969722 | -2.18929117 | 4.85322337  |
| H | -4.27848833 | -2.49196719 | 3.78512429  |
| H | -4.36323333 | -1.21723409 | 5.01636238  |
| H | 0.27926302  | -0.88856407 | -4.04565031 |
| H | -1.18089309 | -0.32845603 | -4.87168537 |
| H | -0.24660802 | -1.68559213 | -5.54598342 |
| H | -3.34834926 | -3.32315526 | -3.99316830 |
| H | -2.41111219 | -3.21086224 | -5.49697044 |
| H | -3.29991125 | -1.79476614 | -4.90032437 |
| O | -0.23074302 | 1.10566708  | 1.35110410  |
| O | 1.89575415  | -0.37511403 | 0.17878701  |
| O | -2.37421118 | -0.15437301 | -0.48356304 |

## Distorted Octahedral Complex

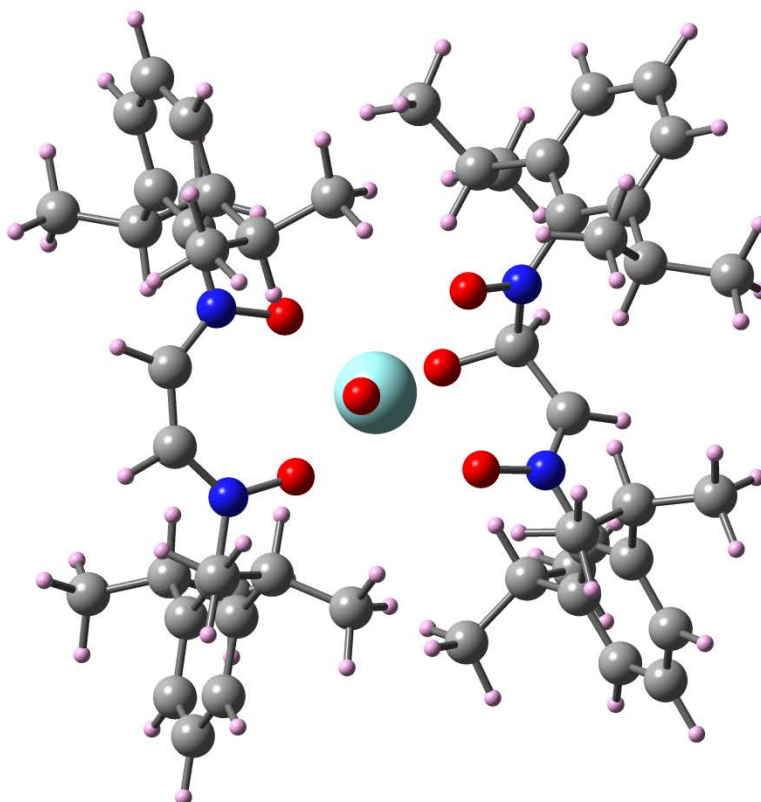

Fig. S135: ONCCNO Distorted Octahedral Complex

| SCF          | E <sub>ZP</sub> | H            | G            |
|--------------|-----------------|--------------|--------------|
| -2741.479870 | -2740.324113    | -2740.252494 | -2740.442148 |

|   |            |             |             |
|---|------------|-------------|-------------|
| O | 1.34812323 | 1.76300519  | 0.48593678  |
| O | 0.89223193 | 0.41740918  | -1.71982729 |
| N | 2.70271538 | -1.38393856 | -0.49909263 |
| N | 2.28589003 | 1.87654766  | -0.46193751 |
| C | 3.09981955 | -0.38428797 | -1.25203592 |
| C | 2.19974871 | 0.80871921  | -1.58304391 |
| C | 3.44108005 | -2.65286173 | -0.43652187 |
| C | 3.29195118 | -3.55309707 | -1.51930901 |
| C | 4.01108393 | -4.76516671 | -1.44169513 |
| C | 4.80675273 | -5.06354607 | -0.32559567 |
| C | 4.89406638 | -4.16162592 | 0.74770874  |
| C | 4.20660724 | -2.93077811 | 0.72196830  |
| C | 1.31414415 | -4.39929472 | -2.87600355 |
| C | 2.37812373 | -3.28140164 | -2.72054045 |
| C | 3.20001280 | -3.11592235 | -4.02625885 |
| C | 3.75483258 | 2.68283581  | 2.78805663  |

|   |             |             |             |
|---|-------------|-------------|-------------|
| C | 4.45617502  | 2.25512475  | 1.46862350  |
| C | 5.97119358  | 2.03395744  | 1.69328157  |
| C | 3.08100611  | 3.08670253  | -0.54651125 |
| C | 4.15774075  | 3.26838831  | 0.36146818  |
| C | 4.91639332  | 4.45025806  | 0.24238572  |
| C | 4.61562744  | 5.40740137  | -0.74083859 |
| C | 3.53379486  | 5.21095046  | -1.61209791 |
| C | 2.73249038  | 4.05268735  | -1.52797539 |
| C | 3.25734327  | -2.46616038 | 3.01755180  |
| C | 4.25273624  | -1.98515976 | 1.92517814  |
| C | 5.67856788  | -1.82832484 | 2.50775807  |
| C | 0.48021054  | 5.03536310  | -2.15256638 |
| C | 1.50678805  | 3.90701501  | -2.43806476 |
| C | 1.90345725  | 3.89215315  | -3.93762040 |
| H | 4.05195507  | -0.51371368 | -1.75676687 |
| H | 2.63496548  | 1.30288811  | -2.46635035 |
| H | 3.93375898  | -5.48411249 | -2.25268696 |
| H | 5.34925125  | -6.00501859 | -0.28487123 |
| H | 5.49881081  | -4.41763133 | 1.61239988  |
| H | 1.82765087  | -2.34916001 | -2.55473297 |
| H | 4.01755110  | 1.29285688  | 1.17397875  |
| H | 1.77479441  | -5.37109616 | -3.09617567 |
| H | 0.63572440  | -4.15410041 | -3.70293721 |
| H | 0.71468693  | -4.50204784 | -1.96404895 |
| H | 3.92739603  | -2.29707023 | -3.94568413 |
| H | 2.53121287  | -2.89442527 | -4.86767374 |
| H | 3.75493415  | -4.03200993 | -4.26760713 |
| H | 4.12413163  | 3.66050735  | 3.12682104  |
| H | 3.95394253  | 1.94879616  | 3.58017651  |
| H | 2.67099991  | 2.74721126  | 2.64724352  |
| H | 6.48484176  | 1.76454987  | 0.76090996  |
| H | 6.12614706  | 1.22381630  | 2.41616273  |
| H | 6.45783356  | 2.92933265  | 2.10088895  |
| H | 5.74751322  | 4.62396910  | 0.91930787  |
| H | 5.21730580  | 6.30992211  | -0.81897051 |
| H | 3.29658983  | 5.97052560  | -2.35240763 |
| H | 3.91293385  | -0.99255824 | 1.60540601  |
| H | 1.00085385  | 2.96130974  | -2.21800296 |
| H | 3.51850867  | -3.47429323 | 3.36785315  |
| H | 2.23481813  | -2.47788638 | 2.62926751  |
| H | 3.28575436  | -1.78526050 | 3.87806908  |
| H | 5.66946624  | -1.07797067 | 3.30847920  |
| H | 6.39882489  | -1.50768492 | 1.74388758  |
| H | 6.04365002  | -2.76509460 | 2.94766318  |
| H | 0.16981477  | 5.02836753  | -1.10107251 |
| H | -0.41537490 | 4.89281422  | -2.77031065 |
| H | 0.89641604  | 6.02557290  | -2.38094485 |
| H | 2.61996822  | 3.08992694  | -4.15957317 |
| H | 2.36147480  | 4.84262552  | -4.24213110 |
| H | 1.01424999  | 3.73205597  | -4.56037635 |
| O | -0.52585502 | -0.08232655 | 1.96081633  |
| O | 1.57209956  | -1.36481712 | 0.25237469  |

|   |             |             |             |
|---|-------------|-------------|-------------|
| O | -1.87159288 | 1.31389223  | -0.34179388 |
| N | -2.85938580 | -1.85474432 | 0.17092246  |
| N | -3.06976298 | 1.45882134  | 0.34445541  |
| C | -3.79658845 | -0.97132961 | 0.61743958  |
| C | -3.88439105 | 0.42485077  | 0.69595028  |
| C | -3.07145450 | -3.28918564 | 0.26772432  |
| C | -2.71617188 | -3.94925697 | 1.47059718  |
| C | -2.94540364 | -5.34114938 | 1.53573781  |
| C | -3.48039109 | -6.03909957 | 0.44177978  |
| C | -3.79518090 | -5.36083949 | -0.74783933 |
| C | -3.59651534 | -3.96942139 | -0.86083336 |
| C | -0.70775066 | -3.79975869 | 3.02106480  |
| C | -2.09638310 | -3.21181355 | 2.66110006  |
| C | -3.04095666 | -3.23961838 | 3.89133527  |
| C | -3.35382131 | 3.37437482  | -2.85723980 |
| C | -4.40180417 | 2.88896269  | -1.81878001 |
| C | -5.84400700 | 3.13677444  | -2.32479330 |
| C | -3.46065993 | 2.83949357  | 0.58088070  |
| C | -4.13052542 | 3.53645776  | -0.45791218 |
| C | -4.49224442 | 4.87682283  | -0.21277149 |
| C | -4.19403004 | 5.49065037  | 1.01578123  |
| C | -3.51532309 | 4.77976879  | 2.01748875  |
| C | -3.12084798 | 3.43819881  | 1.81932554  |
| C | -2.81218828 | -3.57953246 | -3.23334300 |
| C | -3.89664643 | -3.24316329 | -2.17462680 |
| C | -5.31607718 | -3.55275160 | -2.71215679 |
| C | -1.02842734 | 3.41445791  | 3.26626547  |
| C | -2.35180759 | 2.68876358  | 2.91092729  |
| C | -3.22855901 | 2.48951994  | 4.17512140  |
| H | -4.65933845 | -1.48483601 | 1.02940806  |
| H | -4.79959525 | 0.77820552  | 1.15988404  |
| H | -2.69365827 | -5.88072936 | 2.44517666  |
| H | -3.64596776 | -7.11195051 | 0.51262502  |
| H | -4.19883917 | -5.91565643 | -1.59097466 |
| H | -1.92637226 | -2.16429372 | 2.39252821  |
| H | -4.26771332 | 1.80612641  | -1.71740365 |
| H | -0.78016759 | -4.84144134 | 3.36425923  |
| H | -0.25356059 | -3.20428198 | 3.82266707  |
| H | -0.03477617 | -3.76601530 | 2.15600027  |
| H | -4.01730400 | -2.79459161 | 3.65760666  |
| H | -2.59718757 | -2.66754277 | 4.71619270  |
| H | -3.21459340 | -4.26586463 | 4.24391436  |
| H | -3.41643273 | 4.46216191  | -3.00039410 |
| H | -3.52717657 | 2.89066535  | -3.82812889 |
| H | -2.34295710 | 3.11995154  | -2.52074683 |
| H | -6.58997261 | 2.80176117  | -1.59240279 |
| H | -6.01237326 | 2.58694411  | -3.26031611 |
| H | -6.02798552 | 4.19920082  | -2.53169434 |
| H | -5.00830940 | 5.44327932  | -0.98350196 |
| H | -4.48497236 | 6.52469616  | 1.18782756  |
| H | -3.27918535 | 5.27007352  | 2.95837759  |
| H | -3.83694311 | -2.16458027 | -1.99302046 |

|    |             |             |             |
|----|-------------|-------------|-------------|
| H  | -2.06547147 | 1.69837423  | 2.54294796  |
| H  | -2.80433893 | -4.65344910 | -3.46575225 |
| H  | -1.82092134 | -3.29400850 | -2.86467041 |
| H  | -3.00563814 | -3.02979450 | -4.16437988 |
| H  | -5.51434053 | -2.95885837 | -3.61431057 |
| H  | -6.08718686 | -3.31211474 | -1.96886749 |
| H  | -5.42808363 | -4.61080843 | -2.98321056 |
| H  | -0.39335857 | 3.52155350  | 2.37899988  |
| H  | -0.47293808 | 2.82002138  | 4.00202597  |
| H  | -1.20697954 | 4.41220463  | 3.69174494  |
| H  | -4.14990010 | 1.93924259  | 3.94144348  |
| H  | -3.51528370 | 3.45024551  | 4.62530441  |
| H  | -2.67217988 | 1.91469164  | 4.92647284  |
| O  | -1.67646078 | -1.49493984 | -0.46594952 |
| Zr | -0.27993666 | -0.02189291 | 0.15157842  |

## Peroxo Complex

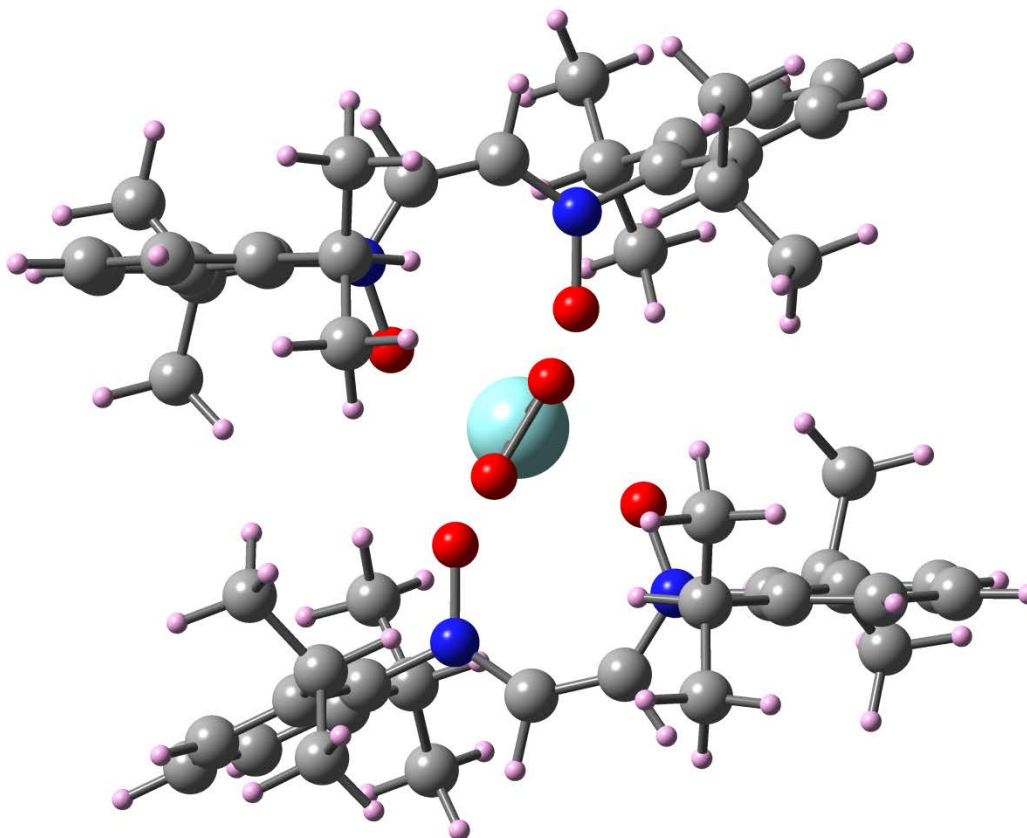

Fig. S136: ONCCNO Peroxo Complex

| SCF          | E <sub>ZP</sub> | H            | G            |
|--------------|-----------------|--------------|--------------|
| -2741.437818 | -2740.283590    | -2740.211385 | -2740.400935 |

|   |             |             |             |
|---|-------------|-------------|-------------|
| O | -1.59379400 | -1.36666600 | 0.15889000  |
| O | 1.59328100  | 1.36687400  | 0.15844100  |
| O | 0.50657500  | -0.60333400 | -2.08747500 |
| O | -0.50509800 | 0.59989900  | -2.08882800 |
| N | -1.33857700 | 2.87343100  | 0.66420000  |
| N | 1.82399600  | 2.66793400  | -0.25694400 |
| N | 1.33819500  | -2.87265800 | 0.66708100  |
| N | -1.82437800 | -2.66834000 | -0.25457900 |
| C | -0.39767200 | 3.78409400  | 0.29120800  |
| C | 0.94096800  | 3.69447200  | -0.11210000 |
| C | 0.39739200  | -3.78373200 | 0.29485500  |
| C | -0.94125300 | -3.69462400 | -0.10853200 |
| C | -2.69194300 | 3.27610500  | 1.01119400  |
| C | -3.66568900 | 3.32457000  | -0.01729300 |
| C | -4.97021300 | 3.72270100  | 0.34512400  |
| C | -5.28613200 | 4.03752400  | 1.67627000  |

|   |             |             |             |
|---|-------------|-------------|-------------|
| C | -4.30610000 | 3.94971200  | 2.67864900  |
| C | -2.98642700 | 3.56081200  | 2.36825100  |
| C | -4.19031000 | 1.72249700  | -1.91610000 |
| C | -3.34906700 | 2.94549400  | -1.46678900 |
| C | -3.55800900 | 4.14664400  | -2.42546400 |
| C | 2.34112100  | 1.61763900  | -4.14502400 |
| C | 2.13121100  | 2.82197900  | -3.19053200 |
| C | 1.90184900  | 4.13315200  | -3.98815100 |
| C | 3.15256500  | 2.88676000  | -0.80741700 |
| C | 3.30346100  | 2.96978300  | -2.21467800 |
| C | 4.60849400  | 3.18316800  | -2.71053900 |
| C | 5.70682600  | 3.28278000  | -1.84328200 |
| C | 5.52730300  | 3.16716900  | -0.45451000 |
| C | 4.24491400  | 2.96585200  | 0.09467700  |
| C | -2.26040800 | 2.14338800  | 4.33108900  |
| C | -1.94293200 | 3.40075800  | 3.47685700  |
| C | -1.82613100 | 4.66403200  | 4.36586400  |
| C | 4.60103300  | 1.42212900  | 2.06762000  |
| C | 4.06340800  | 2.80342500  | 1.60621400  |
| C | 4.72507100  | 3.95456000  | 2.40505300  |
| C | 2.69180200  | -3.27481800 | 1.01369100  |
| C | 2.98708100  | -3.55837800 | 2.37082200  |
| C | 4.30700000  | -3.94676200 | 2.68080200  |
| C | 5.28649700  | -4.03519500 | 1.67794700  |
| C | 4.96978900  | -3.72149500 | 0.34672700  |
| C | 3.66498600  | -3.32389800 | -0.01528900 |
| C | 2.26160300  | -2.13919700 | 4.33256100  |
| C | 1.94414800  | -3.39761000 | 3.47985300  |
| C | 1.82836000  | -4.65997100 | 4.37028100  |
| C | -2.33751200 | -1.62397400 | -4.14360500 |
| C | -2.12965700 | -2.82752100 | -3.18765600 |
| C | -1.90103500 | -4.13979100 | -3.98367600 |
| C | -3.15271500 | -2.88790800 | -0.80529600 |
| C | -3.30276300 | -2.97306000 | -2.21248800 |
| C | -4.60750600 | -3.18712500 | -2.70882300 |
| C | -5.70637100 | -3.28524100 | -1.84206400 |
| C | -5.52767700 | -3.16745900 | -0.45336000 |
| C | -4.24558800 | -2.96546900 | 0.09629100  |
| C | 4.18810300  | -1.72296800 | -1.91549400 |
| C | 3.34749100  | -2.94592900 | -1.46488700 |
| C | 3.55630100  | -4.14767200 | -2.42284400 |
| C | -4.60261600 | -1.41811800 | 2.06619400  |
| C | -4.06496300 | -2.80036400 | 1.60764400  |
| C | -4.72729300 | -3.94990000 | 2.40822400  |
| H | -0.79419500 | 4.79407300  | 0.29043600  |
| H | 1.37936200  | 4.64463300  | -0.39864800 |
| H | 0.79410000  | -4.79363900 | 0.29468000  |
| H | -1.37949700 | -4.64509700 | -0.39427700 |
| H | -5.74288500 | 3.77761800  | -0.41742900 |
| H | -6.29807600 | 4.34119800  | 1.93476200  |
| H | -4.56973500 | 4.17894100  | 3.70793300  |
| H | -2.29831800 | 2.64560700  | -1.53503100 |

|   |             |             |             |
|---|-------------|-------------|-------------|
| H | 1.21770500  | 2.60435100  | -2.62885100 |
| H | -5.26623900 | 1.94368500  | -1.89768500 |
| H | -4.00336000 | 0.85952200  | -1.26698700 |
| H | -3.91746700 | 1.43776800  | -2.93981200 |
| H | -4.60656800 | 4.47309000  | -2.43934400 |
| H | -3.28075900 | 3.86235100  | -3.44865300 |
| H | -2.94212800 | 5.00688000  | -2.13143600 |
| H | 3.26201400  | 1.72002700  | -4.73574100 |
| H | 1.49375700  | 1.54554300  | -4.83827300 |
| H | 2.37556800  | 0.68143000  | -3.57824100 |
| H | 1.72743500  | 4.98785100  | -3.32035700 |
| H | 1.02612000  | 4.02646500  | -4.64125400 |
| H | 2.76594000  | 4.37481400  | -4.62182700 |
| H | 4.76401600  | 3.25718500  | -3.78372500 |
| H | 6.70365200  | 3.44166400  | -2.24859600 |
| H | 6.38853600  | 3.23466900  | 0.20503300  |
| H | -0.96601000 | 3.23131600  | 3.01066700  |
| H | 2.99082300  | 2.81726600  | 1.82856800  |
| H | -3.22806700 | 2.24509000  | 4.84082600  |
| H | -1.48644100 | 1.99730900  | 5.09655500  |
| H | -2.29574600 | 1.24760600  | 3.70032200  |
| H | -2.75632900 | 4.86233100  | 4.91418400  |
| H | -1.59184300 | 5.55440600  | 3.76809800  |
| H | -1.02779000 | 4.53071900  | 5.10782000  |
| H | 4.07406200  | 0.61304700  | 1.55056400  |
| H | 4.44985000  | 1.29681000  | 3.14850200  |
| H | 5.67586200  | 1.32647000  | 1.86153500  |
| H | 5.81687300  | 3.95467700  | 2.29017500  |
| H | 4.50677600  | 3.84243500  | 3.47537300  |
| H | 4.35205300  | 4.93482200  | 2.08077400  |
| H | 4.57124800  | -4.17512100 | 3.71012100  |
| H | 6.29864200  | -4.33847200 | 1.93612500  |
| H | 5.74205200  | -3.77685800 | -0.41620900 |
| H | 0.96689400  | -3.22905100 | 3.01403600  |
| H | -1.21635600 | -2.61028900 | -2.62547000 |
| H | 3.22960400  | -2.23997300 | 4.84183800  |
| H | 1.48802100  | -1.99262000 | 5.09832200  |
| H | 2.29619800  | -1.24408900 | 3.70080300  |
| H | 1.59417000  | -5.55110100 | 3.77360400  |
| H | 1.03032800  | -4.52620000 | 5.11248900  |
| H | 2.75891000  | -4.85725900 | 4.91836600  |
| H | -3.25783800 | -1.72614200 | -4.73523300 |
| H | -1.48932500 | -1.55327600 | -4.83599300 |
| H | -2.37178700 | -0.68718300 | -3.57777900 |
| H | -1.72815700 | -4.99395500 | -3.31480400 |
| H | -1.02460200 | -4.03477800 | -4.63610300 |
| H | -2.76483600 | -4.38118200 | -4.61785600 |
| H | -4.76236400 | -3.26298900 | -3.78197500 |
| H | -6.70296600 | -3.44469700 | -2.24772100 |
| H | -6.38932400 | -3.23377900 | 0.20576000  |
| H | 2.29661800  | -2.64639300 | -1.53279700 |
| H | -2.99251100 | -2.81398900 | 1.83066300  |



|    |             |             |             |
|----|-------------|-------------|-------------|
| H  | 5.26411600  | -1.94378500 | -1.89750500 |
| H  | 4.00120300  | -0.85960300 | -1.26688500 |
| H  | 3.91459400  | -1.43902900 | -2.93924700 |
| H  | 3.27836900  | -3.86417400 | -3.44606800 |
| H  | 2.94087900  | -5.00791500 | -2.12787700 |
| H  | 4.60496400  | -4.47377500 | -2.43709600 |
| H  | -4.07523300 | -0.61008300 | 1.54792000  |
| H  | -4.45201600 | -1.29081700 | 3.14692600  |
| H  | -5.67731500 | -1.32268700 | 1.85932800  |
| H  | -4.35428900 | -4.93083000 | 2.08596000  |
| H  | -5.81903200 | -3.95001500 | 2.29275300  |
| H  | -4.50957100 | -3.83584500 | 3.47845600  |
| O  | -1.10908700 | 1.51489000  | 0.75671500  |
| O  | 1.10830900  | -1.51413400 | 0.75927600  |
| Zr | -0.00008100 | -0.00019800 | -0.21000900 |

## Octahedral Complex with Transferred Allylic H

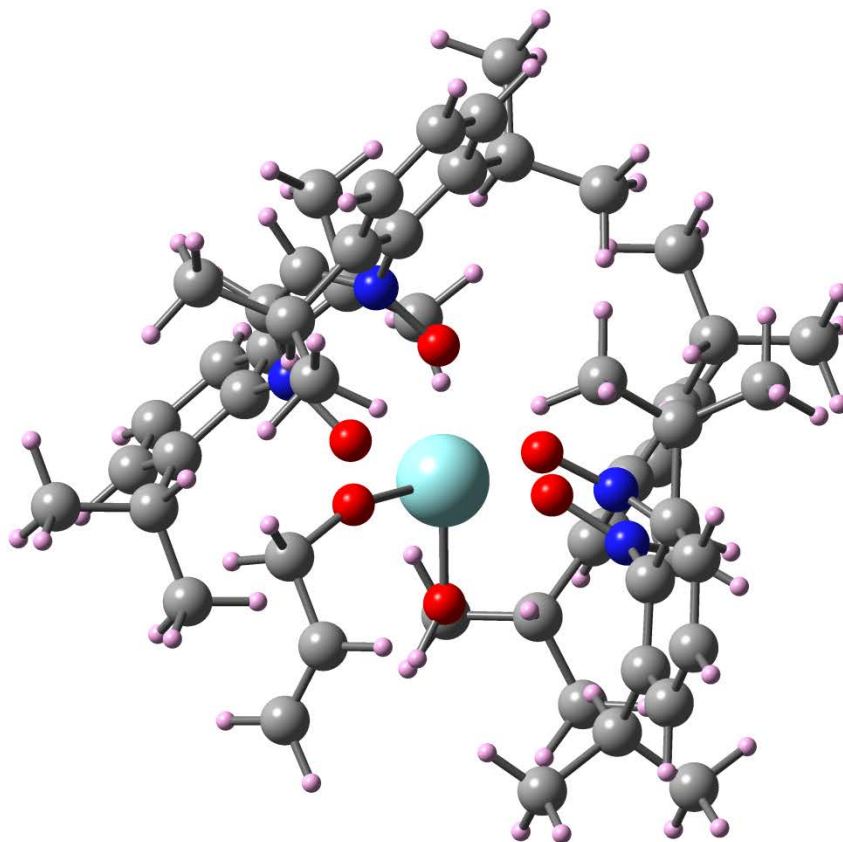

Fig. S137: ONCCNO Octahedral Complex with Transferred Allylic H

| SCF          | E <sub>ZP</sub> | H            | G            |
|--------------|-----------------|--------------|--------------|
| -2859.428725 | -2858.191821    | -2858.114492 | -2858.313770 |

|   |             |             |             |
|---|-------------|-------------|-------------|
| O | 0.39290200  | -1.42918900 | 0.72978700  |
| O | 1.90339400  | 0.57110200  | -0.88197700 |
| O | -0.03469600 | -1.39353200 | -2.16204400 |
| N | 0.16569600  | 2.88869200  | 0.84659700  |
| N | 2.80364800  | 1.57513600  | -0.62123300 |
| N | -2.83610800 | -1.71792800 | -0.04424800 |
| N | 0.12194900  | -2.74185300 | 1.02171300  |
| C | 1.39322200  | 3.37466400  | 0.51385200  |
| C | 2.52160200  | 2.79709600  | -0.07751600 |
| C | -2.36238300 | -2.87464300 | 0.50250000  |
| C | -1.11040400 | -3.31733800 | 0.94022100  |
| C | -0.81356800 | 3.72511900  | 1.52312000  |
| C | -1.58979400 | 4.63663800  | 0.76407500  |
| C | -2.50324300 | 5.45484700  | 1.46373500  |
| C | -2.65905200 | 5.34255700  | 2.85339000  |
| C | -1.90126700 | 4.40589500  | 3.57533800  |

|   |             |             |             |
|---|-------------|-------------|-------------|
| C | -0.95943500 | 3.58062100  | 2.92783000  |
| C | -2.84951800 | 4.59484900  | -1.44742600 |
| C | -1.46993500 | 4.75281900  | -0.75879700 |
| C | -0.80460300 | 6.09509700  | -1.16554000 |
| C | 3.03330300  | 0.52028000  | -4.27993800 |
| C | 3.45866800  | 1.77070000  | -3.46312000 |
| C | 3.95790300  | 2.90337100  | -4.39420600 |
| C | 4.16250800  | 1.25761100  | -1.03572300 |
| C | 4.49629100  | 1.37640700  | -2.40893300 |
| C | 5.81998300  | 1.07096000  | -2.78633400 |
| C | 6.76691000  | 0.66139100  | -1.83279300 |
| C | 6.40169100  | 0.53009300  | -0.48429200 |
| C | 5.08615300  | 0.81335000  | -0.05745000 |
| C | -1.07503000 | 1.38464400  | 4.17370000  |
| C | -0.15576000 | 2.55353600  | 3.72942200  |
| C | 0.56584100  | 3.19171000  | 4.94309600  |
| C | 4.89651800  | -0.86227400 | 1.84381700  |
| C | 4.69737900  | 0.61315200  | 1.41039500  |
| C | 5.48192400  | 1.57611600  | 2.33964400  |
| C | -4.21642500 | -1.61918000 | -0.48914600 |
| C | -4.61125100 | -2.29848600 | -1.67189100 |
| C | -5.96186900 | -2.18683800 | -2.06729400 |
| C | -6.86945000 | -1.40719400 | -1.33416400 |
| C | -6.44448700 | -0.72569100 | -0.18202500 |
| C | -5.11241800 | -0.82125900 | 0.26973200  |
| C | -3.63306700 | -2.68910100 | -3.99843100 |
| C | -3.63874500 | -3.13350700 | -2.51363400 |
| C | -3.96555900 | -4.64738600 | -2.40604800 |
| C | 1.47277400  | -1.85991900 | 4.76494400  |
| C | 0.63243500  | -2.84470800 | 3.91181000  |
| C | -0.13711200 | -3.84273200 | 4.81657700  |
| C | 1.26549100  | -3.50868000 | 1.49678200  |
| C | 1.50768400  | -3.57790000 | 2.89142900  |
| C | 2.60312500  | -4.35402900 | 3.32547900  |
| C | 3.43112500  | -5.01293700 | 2.40253300  |
| C | 3.18552000  | -4.89875900 | 1.02494300  |
| C | 2.10003600  | -4.13826100 | 0.53970800  |
| C | -4.61490200 | 1.45675700  | 1.25535500  |
| C | -4.67020100 | -0.06949500 | 1.52803600  |
| C | -5.57615600 | -0.38914900 | 2.74437400  |
| C | 3.08013000  | -3.39692800 | -1.68499500 |
| C | 1.85415100  | -4.01653100 | -0.96626700 |
| C | 1.48467300  | -5.39208900 | -1.58171400 |
| H | 1.51248600  | 4.41946500  | 0.78110300  |
| H | 3.38316900  | 3.45614000  | -0.11849800 |
| H | -3.14143000 | -3.62603300 | 0.57883500  |
| H | -1.09974700 | -4.34713200 | 1.28192900  |
| H | -3.10646900 | 6.17356100  | 0.91487000  |
| H | -3.37378800 | 5.97774100  | 3.37183600  |
| H | -2.03759500 | 4.32100300  | 4.65043200  |
| H | -0.83807700 | 3.93384200  | -1.11741600 |
| H | 2.56434800  | 2.13546100  | -2.94588400 |

|   |             |             |             |
|---|-------------|-------------|-------------|
| H | -3.55147000 | 5.38260700  | -1.14432100 |
| H | -3.29685100 | 3.62403400  | -1.20428800 |
| H | -2.73628000 | 4.65658800  | -2.53800300 |
| H | -1.41019800 | 6.95270600  | -0.84265900 |
| H | -0.69384600 | 6.15190800  | -2.25672200 |
| H | 0.19215800  | 6.20181200  | -0.71800400 |
| H | 3.88986900  | 0.08962300  | -4.81644600 |
| H | 2.26975300  | 0.79187200  | -5.02204300 |
| H | 2.61434300  | -0.24451300 | -3.61697900 |
| H | 4.25876500  | 3.79021800  | -3.82140500 |
| H | 3.15864700  | 3.19932800  | -5.08665500 |
| H | 4.81658700  | 2.58614900  | -5.00030300 |
| H | 6.11260700  | 1.15310300  | -3.82980300 |
| H | 7.78462400  | 0.43535100  | -2.14302600 |
| H | 7.13881800  | 0.19399600  | 0.24082300  |
| H | 0.60679300  | 2.12189600  | 3.07404100  |
| H | 3.63118700  | 0.83658600  | 1.52008500  |
| H | -1.88105800 | 1.73985800  | 4.83076000  |
| H | -0.49274000 | 0.63373800  | 4.72362200  |
| H | -1.52006600 | 0.90054100  | 3.29765800  |
| H | -0.14467900 | 3.58920700  | 5.67966900  |
| H | 1.22273400  | 4.01418800  | 4.63099400  |
| H | 1.18164300  | 2.43805100  | 5.45189000  |
| H | 4.30402900  | -1.53917400 | 1.21801500  |
| H | 4.57471600  | -0.99690900 | 2.88495100  |
| H | 5.95002200  | -1.16474700 | 1.77601000  |
| H | 6.56292300  | 1.38951100  | 2.28786500  |
| H | 5.16744100  | 1.43867300  | 3.38270400  |
| H | 5.30888100  | 2.62525900  | 2.06674000  |
| H | -6.30103900 | -2.70171500 | -2.96269400 |
| H | -7.90354400 | -1.32728200 | -1.66171700 |
| H | -7.15511800 | -0.12129800 | 0.37568300  |
| H | -2.62490800 | -2.97732800 | -2.13106400 |
| H | -0.10608200 | -2.24670200 | 3.36749300  |
| H | -4.60590800 | -2.85452200 | -4.47957600 |
| H | -2.88319000 | -3.26424300 | -4.55815800 |
| H | -3.38383000 | -1.62599100 | -4.08912600 |
| H | -3.93856800 | -4.99369600 | -1.36490600 |
| H | -3.23778800 | -5.23729100 | -2.97886900 |
| H | -4.96585400 | -4.86435600 | -2.80422400 |
| H | 2.23148800  | -2.38451500 | 5.36071500  |
| H | 0.82255100  | -1.31260400 | 5.46017900  |
| H | 1.98279500  | -1.13055700 | 4.12416700  |
| H | -0.76962900 | -4.51393000 | 4.22144200  |
| H | -0.78339200 | -3.30091300 | 5.52000600  |
| H | 0.55291900  | -4.46420900 | 5.40257200  |
| H | 2.81252000  | -4.43871200 | 4.38904000  |
| H | 4.27050100  | -5.60762700 | 2.75618600  |
| H | 3.84167500  | -5.40160900 | 0.31884300  |
| H | -3.65152400 | -0.38230300 | 1.77665800  |
| H | 1.01889200  | -3.33184300 | -1.14127500 |
| H | -5.60557000 | 1.85039600  | 0.98782000  |

|    |             |             |             |
|----|-------------|-------------|-------------|
| H  | -3.91806000 | 1.66941200  | 0.43795000  |
| H  | -4.26442400 | 1.99232800  | 2.14731900  |
| H  | -5.18965600 | 0.11445500  | 3.64035300  |
| H  | -5.60949700 | -1.46785200 | 2.94648900  |
| H  | -6.60673500 | -0.04315600 | 2.58960400  |
| H  | 3.28906000  | -2.39370400 | -1.29629500 |
| H  | 2.87273100  | -3.30263100 | -2.75899300 |
| H  | 3.98177600  | -4.01386900 | -1.56738100 |
| H  | 0.59223600  | -5.81773900 | -1.10365800 |
| H  | 2.30290500  | -6.11728800 | -1.47282600 |
| H  | 1.27486500  | -5.28065400 | -2.65397700 |
| O  | -0.72291300 | 1.40086200  | -2.09954400 |
| O  | -2.12609200 | -0.53580500 | -0.14858100 |
| O  | -0.15475300 | 1.55002200  | 0.77607400  |
| Zr | -0.16190800 | 0.03383800  | -0.76253300 |
| C  | -0.92513000 | 1.88826300  | -3.42841700 |
| H  | -1.47191200 | 2.84407300  | -3.37368100 |
| C  | -1.72172800 | 0.90950800  | -4.26745400 |
| H  | -2.66896100 | 0.59688500  | -3.82406400 |
| C  | -1.33884100 | 0.43106700  | -5.46935500 |
| H  | -0.14524600 | -1.52917000 | -3.11696800 |
| H  | -1.96086600 | -0.25702200 | -6.03821300 |
| H  | -0.39154500 | 0.72110200  | -5.92310600 |
| H  | 0.04671300  | 2.08800500  | -3.90992200 |

**Oxo Complex with Propylene Oxide Molecule (reaction products of dioxo complex with propene)**

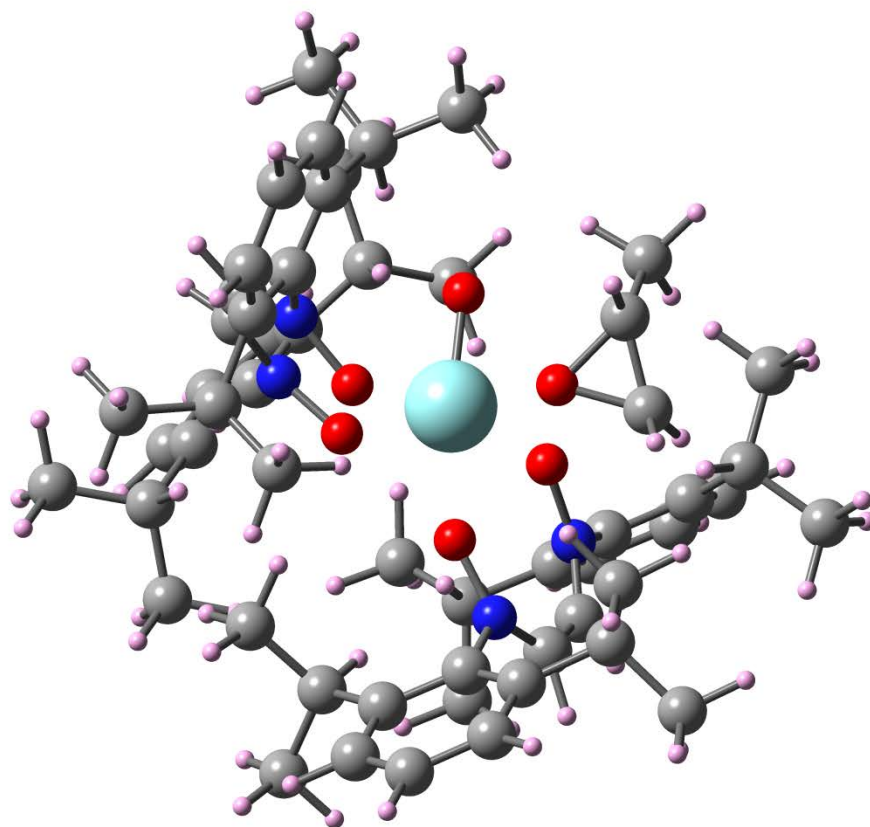

Fig. S138: ONCCNO Oxo Complex with Propylene Oxide Molecule (reaction products of dioxo complex with propene)

| SCF          | E <sub>ZP</sub> | H            | G            |
|--------------|-----------------|--------------|--------------|
| -2859.362681 | -2858.123493    | -2858.047092 | -2858.241102 |

|   |             |             |             |
|---|-------------|-------------|-------------|
| O | 0.30645800  | -1.40816600 | 0.79739400  |
| O | 1.77677700  | 0.76565300  | -1.09649300 |
| O | -0.17215100 | -1.35607500 | -2.15699900 |
| N | 0.13523500  | 2.93468200  | 0.92415900  |
| N | 2.76329700  | 1.52015600  | -0.47605600 |
| N | -2.88464000 | -1.68749000 | -0.28499500 |
| N | 0.01836800  | -2.76252100 | 0.90635200  |
| C | 1.45046800  | 3.29327700  | 0.81436100  |
| C | 2.55955700  | 2.66720400  | 0.23898100  |
| C | -2.42469900 | -2.88665700 | 0.16916900  |
| C | -1.19809800 | -3.33365300 | 0.67076000  |
| C | -0.78894200 | 3.75323400  | 1.69895200  |
| C | -1.34057000 | 4.92210700  | 1.11882400  |
| C | -2.22566400 | 5.69033400  | 1.90571300  |

|   |             |             |             |
|---|-------------|-------------|-------------|
| C | -2.56521700 | 5.29216400  | 3.20722200  |
| C | -2.02235700 | 4.11546100  | 3.74871300  |
| C | -1.11991000 | 3.32265400  | 3.01052600  |
| C | -2.31507600 | 5.45702000  | -1.16810000 |
| C | -1.02400900 | 5.36097800  | -0.31399500 |
| C | -0.24543400 | 6.70284400  | -0.33772000 |
| C | 3.79086300  | 1.30003100  | -4.43632000 |
| C | 3.86610900  | 2.12825800  | -3.12848300 |
| C | 4.45309000  | 3.53941300  | -3.39967500 |
| C | 4.12431800  | 1.09731800  | -0.77539100 |
| C | 4.66828200  | 1.39444400  | -2.05127100 |
| C | 6.00240300  | 1.01494500  | -2.30419400 |
| C | 6.76444400  | 0.36050500  | -1.32327600 |
| C | 6.19809500  | 0.06230600  | -0.07471400 |
| C | 4.86355800  | 0.41252500  | 0.22376600  |
| C | -1.65130500 | 0.93496200  | 3.64989000  |
| C | -0.55554900 | 2.03374400  | 3.61386200  |
| C | 0.05620600  | 2.26335600  | 5.01876200  |
| C | 4.52655500  | -1.40811800 | 1.98485200  |
| C | 4.26836200  | 0.06725200  | 1.59283000  |
| C | 4.81592600  | 1.02133600  | 2.68958300  |
| C | -4.20871500 | -1.56886600 | -0.87113400 |
| C | -4.41799000 | -2.03910900 | -2.19412800 |
| C | -5.72476500 | -1.93709600 | -2.71933700 |
| C | -6.76400400 | -1.35922800 | -1.97371300 |
| C | -6.51797000 | -0.86949700 | -0.68064800 |
| C | -5.23671700 | -0.96734700 | -0.09958500 |
| C | -3.22823200 | -1.98523400 | -4.45039600 |
| C | -3.29120100 | -2.63604600 | -3.04546600 |
| C | -3.44792800 | -4.17507800 | -3.17705500 |
| C | 1.23707700  | -2.06002700 | 4.69333800  |
| C | 0.41905500  | -3.02171100 | 3.79330300  |
| C | -0.37075500 | -4.04392100 | 4.65207400  |
| C | 1.12507100  | -3.58101300 | 1.37524500  |
| C | 1.31695000  | -3.72614900 | 2.77210800  |
| C | 2.37302700  | -4.55582600 | 3.20340900  |
| C | 3.20685500  | -5.20092200 | 2.27515300  |
| C | 3.00655700  | -5.01968500 | 0.89730000  |
| C | 1.96420600  | -4.19906300 | 0.41383200  |
| C | -4.97240400 | 1.14037300  | 1.27021300  |
| C | -4.98070500 | -0.41122100 | 1.30322300  |
| C | -6.00027900 | -0.94366000 | 2.34138600  |
| C | 3.03062000  | -3.41798900 | -1.76181200 |
| C | 1.76329000  | -4.00777600 | -1.09220400 |
| C | 1.35128900  | -5.34098400 | -1.77065900 |
| H | 1.66745100  | 4.23754200  | 1.30261800  |
| H | 3.49362200  | 3.19091000  | 0.41988100  |
| H | -3.17404900 | -3.66678100 | 0.08510200  |
| H | -1.18639300 | -4.39365800 | 0.90440000  |
| H | -2.66091400 | 6.59716400  | 1.49296200  |
| H | -3.25449800 | 5.89307400  | 3.79600500  |
| H | -2.29776200 | 3.81346200  | 4.75579600  |

|   |             |             |             |
|---|-------------|-------------|-------------|
| H | -0.38359600 | 4.59807900  | -0.77021200 |
| H | 2.84268900  | 2.25026900  | -2.75972900 |
| H | -2.99982900 | 6.22082500  | -0.77840900 |
| H | -2.85120200 | 4.49985100  | -1.17809900 |
| H | -2.07090200 | 5.73409800  | -2.20354700 |
| H | -0.83829000 | 7.51433400  | 0.10400300  |
| H | -0.00088900 | 6.98835300  | -1.36979600 |
| H | 0.69289200  | 6.62938900  | 0.22680600  |
| H | 4.78541300  | 1.15291200  | -4.87739500 |
| H | 3.17216200  | 1.81771800  | -5.18235300 |
| H | 3.35386300  | 0.31270400  | -4.24654300 |
| H | 4.47145900  | 4.14608400  | -2.48506800 |
| H | 3.84919000  | 4.06872100  | -4.14956400 |
| H | 5.48084100  | 3.47663200  | -3.78128000 |
| H | 6.44800400  | 1.23574700  | -3.27097500 |
| H | 7.79372700  | 0.07868900  | -1.53333200 |
| H | 6.79264100  | -0.45796700 | 0.67128200  |
| H | 0.23959100  | 1.66190500  | 2.95999300  |
| H | 3.18257000  | 0.20108600  | 1.53773100  |
| H | -2.50338300 | 1.24618500  | 4.27102600  |
| H | -1.24066300 | 0.00815500  | 4.07220100  |
| H | -2.00670000 | 0.72072600  | 2.63692100  |
| H | -0.70296100 | 2.56410600  | 5.75296500  |
| H | 0.83145600  | 3.04055000  | 4.99756000  |
| H | 0.51470200  | 1.33367800  | 5.38100000  |
| H | 4.15530400  | -2.09592000 | 1.21767600  |
| H | 4.00701300  | -1.64232700 | 2.92211800  |
| H | 5.59496900  | -1.60952000 | 2.13998800  |
| H | 5.90625400  | 0.92595800  | 2.78343900  |
| H | 4.36958100  | 0.77877700  | 3.66319200  |
| H | 4.58672300  | 2.07029600  | 2.46369200  |
| H | -5.92498200 | -2.29836000 | -3.72478200 |
| H | -7.76152900 | -1.28475400 | -2.40136700 |
| H | -7.32816800 | -0.41477500 | -0.11628700 |
| H | -2.32881200 | -2.42739200 | -2.56541200 |
| H | -0.30644400 | -2.40974600 | 3.24716700  |
| H | -4.11637600 | -2.21437000 | -5.05505600 |
| H | -2.34841500 | -2.35970600 | -4.98896200 |
| H | -3.14063800 | -0.89450800 | -4.37174500 |
| H | -3.43691500 | -4.66653500 | -2.19580800 |
| H | -2.62155500 | -4.58943000 | -3.76942900 |
| H | -4.39171600 | -4.43910000 | -3.67447500 |
| H | 1.99040200  | -2.59971900 | 5.28284400  |
| H | 0.57118300  | -1.54135300 | 5.39624800  |
| H | 1.75090200  | -1.30469000 | 4.08669200  |
| H | -0.98644200 | -4.69968000 | 4.02323700  |
| H | -1.03564700 | -3.52082000 | 5.35244100  |
| H | 0.30434000  | -4.67973300 | 5.24007400  |
| H | 2.54409900  | -4.69808900 | 4.26788300  |
| H | 4.01466000  | -5.83969600 | 2.62568600  |
| H | 3.66514400  | -5.51657900 | 0.18919000  |
| H | -3.98211500 | -0.72685200 | 1.62241000  |



|    |             |             |             |
|----|-------------|-------------|-------------|
| H  | 0.95997000  | -3.28478700 | -1.26603400 |
| H  | -5.94371800 | 1.53552400  | 0.94134200  |
| H  | -4.19566200 | 1.50009500  | 0.58704800  |
| H  | -4.76082100 | 1.54283300  | 2.26963200  |
| H  | -5.73705900 | -0.58165400 | 3.34417900  |
| H  | -6.01046900 | -2.04120800 | 2.36621000  |
| H  | -7.02102200 | -0.60174700 | 2.12486100  |
| H  | 3.29262200  | -2.45046100 | -1.31778700 |
| H  | 2.83619500  | -3.25054800 | -2.82852800 |
| H  | 3.89623100  | -4.08943000 | -1.67177700 |
| H  | 0.43263600  | -5.74811200 | -1.32753600 |
| H  | 2.13715800  | -6.10384300 | -1.67875600 |
| H  | 1.16506400  | -5.17233700 | -2.83920900 |
| O  | -0.99914500 | 1.44631900  | -2.39026800 |
| O  | -2.19470100 | -0.49152100 | -0.14385700 |
| O  | -0.35626100 | 1.73090100  | 0.51320200  |
| Zr | -0.18315300 | -0.09419700 | -0.82436400 |
| C  | -0.56585400 | 2.66924000  | -3.13469800 |
| H  | -1.20456500 | 3.53011400  | -2.96304300 |
| C  | -1.06992700 | 1.48932100  | -3.90758700 |
| H  | -2.11093100 | 1.52110100  | -4.22641300 |
| C  | -0.16284800 | 0.54781500  | -4.66038900 |
| H  | -0.38241800 | -0.48434200 | -4.36657300 |
| H  | -0.31849800 | 0.67411200  | -5.74074500 |
| H  | 0.88956500  | 0.73038900  | -4.42552100 |
| H  | 0.50649900  | 2.84431700  | -3.09183000 |

## 10.4 Structures with seven oxygen atoms

### Oxo Complex with adsorbed O<sub>2</sub> molecule (planar conformation)

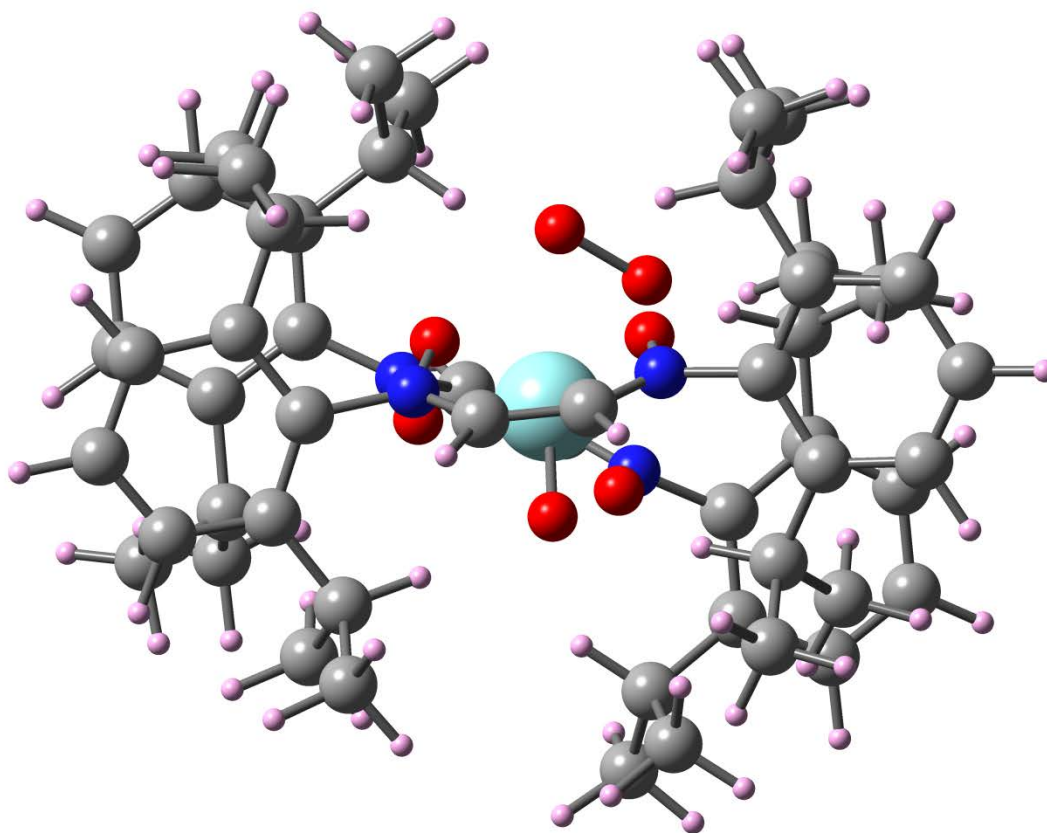

Fig. S139: ONCCNO Oxo Complex with adsorbed O<sub>2</sub> molecule (planar conformation)

| SCF          | E <sub>ZP</sub> | H            | G            |
|--------------|-----------------|--------------|--------------|
| -2816.603173 | -2815.444668    | -2815.371434 | -2815.560405 |

|    |             |             |             |
|----|-------------|-------------|-------------|
| Zr | 0.23490100  | 0.01289600  | -0.01408400 |
| O  | 1.25709300  | -1.77832300 | 0.60702100  |
| O  | -1.31363500 | 1.70453200  | -0.31386500 |
| O  | 0.02898300  | -0.02513000 | -2.39657400 |
| O  | 1.24475100  | -0.57624600 | -1.99823200 |
| N  | 1.73591300  | 2.94344000  | -0.09552700 |
| N  | -1.46319400 | 2.68902600  | 0.58771600  |
| N  | -1.81560900 | -2.40307900 | -0.58845400 |
| N  | 1.37154500  | -3.04397600 | 0.06809800  |
| C  | 0.88896500  | 3.64162100  | 0.65560100  |
| C  | -0.50241600 | 3.51366100  | 0.98371500  |
| C  | -0.99483200 | -3.47784900 | -0.77153900 |
| C  | 0.34656200  | -3.75460100 | -0.48365900 |
| C  | 3.13233700  | 3.40615900  | -0.20922000 |

|   |             |             |             |
|---|-------------|-------------|-------------|
| C | 4.02863400  | 3.06717000  | 0.83095000  |
| C | 5.35727000  | 3.52508100  | 0.69035100  |
| C | 5.75724300  | 4.25315500  | -0.44050500 |
| C | 4.84173100  | 4.53450700  | -1.46889300 |
| C | 3.49974500  | 4.11138300  | -1.38060400 |
| C | 4.48609800  | 0.94769900  | 2.15312600  |
| C | 3.61895200  | 2.22913600  | 2.04745100  |
| C | 3.70704400  | 3.06215000  | 3.35333700  |
| C | -2.36532500 | 0.42405300  | 3.85758600  |
| C | -1.97834900 | 1.85417200  | 3.40012000  |
| C | -1.71899700 | 2.77563200  | 4.62099400  |
| C | -2.82013400 | 2.83809600  | 1.14080600  |
| C | -3.05533100 | 2.44627400  | 2.48249600  |
| C | -4.37463500 | 2.60449500  | 2.96200600  |
| C | -5.39470000 | 3.10669700  | 2.14068000  |
| C | -5.12305700 | 3.46310500  | 0.80960500  |
| C | -3.82566100 | 3.33493500  | 0.27459100  |
| C | 2.75613800  | 3.29784500  | -3.65341400 |
| C | 2.52121100  | 4.35080400  | -2.53450300 |
| C | 2.59838300  | 5.79122500  | -3.09666800 |
| C | -4.26586600 | 2.71160700  | -2.13809200 |
| C | -3.55742000 | 3.71095200  | -1.18591600 |
| C | -3.97831100 | 5.17124400  | -1.49307900 |
| C | -3.20403900 | -2.45436400 | -1.02589300 |
| C | -3.50472500 | -2.26594100 | -2.39901600 |
| C | -4.86028600 | -2.35358700 | -2.78688400 |
| C | -5.86929500 | -2.60153300 | -1.84554700 |
| C | -5.54350400 | -2.77073000 | -0.48918100 |
| C | -4.20649400 | -2.70046800 | -0.04974000 |
| C | -2.71477900 | -0.66593900 | -4.21958400 |
| C | -2.43296500 | -1.98443900 | -3.45625700 |
| C | -2.29996100 | -3.17356100 | -4.44502300 |
| C | 2.43587100  | -2.74060100 | 3.67139500  |
| C | 1.99597100  | -3.92860100 | 2.77343400  |
| C | 1.82525800  | -5.22524900 | 3.60356600  |
| C | 2.67045100  | -3.66135700 | 0.29522600  |
| C | 2.97541800  | -4.10422400 | 1.60924300  |
| C | 4.24176600  | -4.68616800 | 1.82113800  |
| C | 5.16001600  | -4.82423400 | 0.76661600  |
| C | 4.83365700  | -4.36766100 | -0.51903900 |
| C | 3.58526500  | -3.76184300 | -0.78222000 |
| C | -4.80110000 | -2.19756700 | 2.38984800  |
| C | -3.85777400 | -2.95152700 | 1.42086100  |
| C | -3.87051100 | -4.47559400 | 1.72384800  |
| C | 4.30866000  | -2.16028300 | -2.62064100 |
| C | 3.27517800  | -3.23059100 | -2.18483900 |
| C | 3.20308700  | -4.38277100 | -3.22100800 |
| H | 1.35980100  | 4.50042600  | 1.12138000  |
| H | -0.84656700 | 4.25930900  | 1.69178400  |
| H | -1.50947300 | -4.29287600 | -1.27012600 |
| H | 0.66069900  | -4.75103800 | -0.77583100 |
| H | 6.08262600  | 3.29521300  | 1.46600100  |

|   |             |             |             |
|---|-------------|-------------|-------------|
| H | 6.78694800  | 4.59169500  | -0.52838000 |
| H | 5.17301200  | 5.08257600  | -2.34612400 |
| H | 2.58267100  | 1.88857800  | 1.93624400  |
| H | -1.03750100 | 1.73573500  | 2.85132000  |
| H | 5.54559500  | 1.18035100  | 2.32752400  |
| H | 4.41040600  | 0.34645000  | 1.23949300  |
| H | 4.13128100  | 0.33108000  | 2.98813100  |
| H | 4.73410700  | 3.39874300  | 3.55070800  |
| H | 3.37977000  | 2.45353100  | 4.20561700  |
| H | 3.06579400  | 3.95344300  | 3.30968100  |
| H | -3.29965100 | 0.41007500  | 4.43603100  |
| H | -1.56541400 | 0.01460800  | 4.48714400  |
| H | -2.47820200 | -0.23763200 | 2.99181900  |
| H | -1.41281400 | 3.78543000  | 4.31275800  |
| H | -0.91674800 | 2.35411600  | 5.23984300  |
| H | -2.61278800 | 2.87838100  | 5.25159600  |
| H | -4.60155700 | 2.31812700  | 3.98513600  |
| H | -6.40276100 | 3.21391600  | 2.53420700  |
| H | -5.92365600 | 3.84319600  | 0.18105400  |
| H | 1.49885400  | 4.19720600  | -2.16718100 |
| H | -2.48404900 | 3.62566900  | -1.38509900 |
| H | 3.77076100  | 3.38529600  | -4.06507300 |
| H | 2.04033100  | 3.44984500  | -4.47192200 |
| H | 2.62045600  | 2.28295500  | -3.26549400 |
| H | 3.56251900  | 5.98815800  | -3.58254300 |
| H | 2.45685600  | 6.54245600  | -2.30857900 |
| H | 1.81697300  | 5.93693800  | -3.85354700 |
| H | -3.93897500 | 1.68682100  | -1.93270700 |
| H | -4.02552600 | 2.94809100  | -3.18296400 |
| H | -5.35701000 | 2.75613200  | -2.02173200 |
| H | -5.05931400 | 5.31656500  | -1.37051000 |
| H | -3.72604000 | 5.42342000  | -2.53137600 |
| H | -3.46668100 | 5.88491700  | -0.83380400 |
| H | -5.12387300 | -2.21755300 | -3.83268100 |
| H | -6.90717600 | -2.66239700 | -2.16555900 |
| H | -6.33461600 | -2.96253500 | 0.23053600  |
| H | -1.46864100 | -1.85107100 | -2.95919000 |
| H | 1.01526800  | -3.66484700 | 2.36339300  |
| H | -3.65505200 | -0.71362400 | -4.78616300 |
| H | -1.89868100 | -0.46535300 | -4.92437500 |
| H | -2.76784700 | 0.18009800  | -3.52550500 |
| H | -2.05715800 | -4.10808100 | -3.92188200 |
| H | -1.50080000 | -2.97263200 | -5.17029200 |
| H | -3.23182000 | -3.33527800 | -5.00378900 |
| H | 3.43665200  | -2.91246600 | 4.09188500  |
| H | 1.73146400  | -2.61526200 | 4.50491400  |
| H | 2.44591200  | -1.81259700 | 3.09055100  |
| H | 1.52153100  | -6.07009800 | 2.97158500  |
| H | 1.05384300  | -5.07743500 | 4.37098700  |
| H | 2.75205500  | -5.50654200 | 4.12081500  |
| H | 4.51025000  | -5.03610000 | 2.81440400  |
| H | 6.13014900  | -5.28096800 | 0.94976700  |

|   |             |             |             |
|---|-------------|-------------|-------------|
| H | 5.55745600  | -4.46766200 | -1.32394400 |
| H | -2.84456700 | -2.57836800 | 1.59799500  |
| H | 2.30338300  | -2.72938300 | -2.16860300 |
| H | -5.82740400 | -2.58620400 | 2.34729800  |
| H | -4.83019100 | -1.12605800 | 2.15938000  |
| H | -4.44707500 | -2.31527600 | 3.42238000  |
| H | -3.59038100 | -4.65923600 | 2.76983400  |
| H | -3.16120100 | -5.01490600 | 1.08343800  |
| H | -4.86937300 | -4.90179800 | 1.55800600  |
| H | 4.33083300  | -1.32865300 | -1.90685600 |
| H | 4.03022800  | -1.75189800 | -3.60012500 |
| H | 5.32194200  | -2.57792600 | -2.69852900 |
| H | 2.44669900  | -5.12831000 | -2.94132400 |
| H | 4.16669800  | -4.90207500 | -3.31258100 |
| H | 2.93917300  | -3.98479000 | -4.20955300 |
| O | 0.53897200  | 0.83908800  | 1.60702700  |
| O | 1.47557300  | 1.82672300  | -0.77653900 |
| O | -1.47819700 | -1.27611800 | 0.15667300  |

**Oxo Complex with adsorbed O<sub>2</sub> molecule (butterfly conformation)**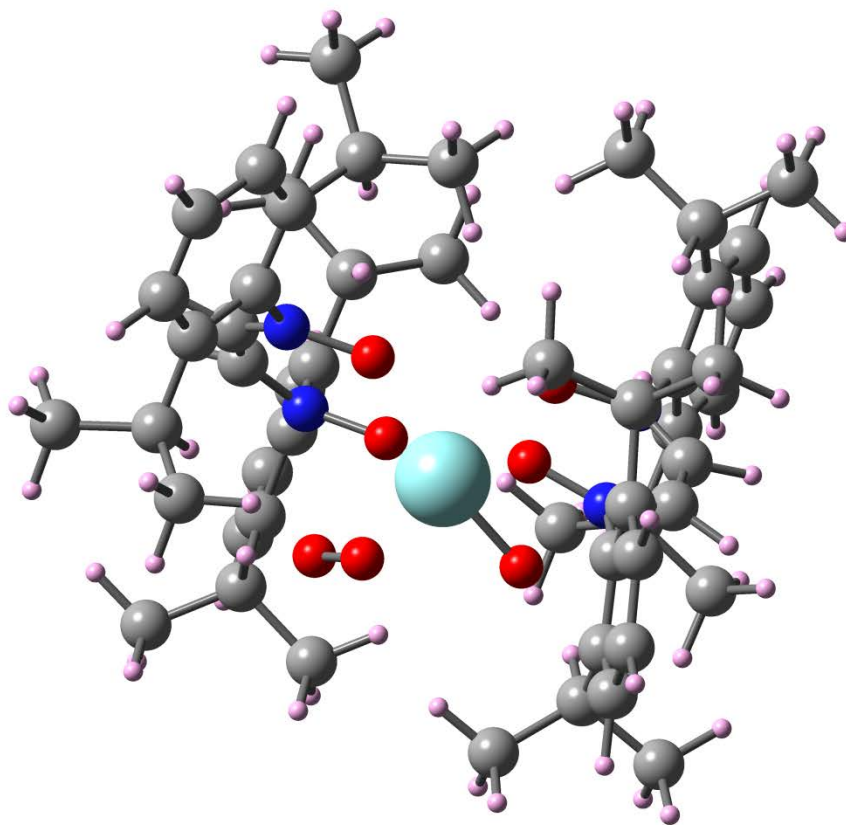Fig. S140: ONCCNO Oxo Complex with adsorbed O<sub>2</sub> molecule (butterfly conformation)

| SCF          | E <sub>ZP</sub> | H            | G            |
|--------------|-----------------|--------------|--------------|
| -2816.609512 | -2815.451430    | -2815.378006 | -2815.567757 |

|   |             |             |             |
|---|-------------|-------------|-------------|
| O | -0.31128718 | 1.62178774  | 0.74310853  |
| O | -2.29300873 | -0.52703418 | -0.13659437 |
| O | -1.38473111 | 1.37698692  | -2.17957193 |
| N | -0.06639970 | -2.74666994 | 0.83156035  |
| N | -2.86501358 | -1.68925618 | -0.48394328 |
| N | 2.81056773  | 1.42501003  | -0.48367436 |
| N | 0.14931674  | 2.91000970  | 0.87001752  |
| C | -1.10774631 | -3.35638941 | 0.27513164  |
| C | -2.33401628 | -2.89365603 | -0.31293757 |
| C | 2.54150963  | 2.65955285  | 0.03315831  |
| C | 1.43028352  | 3.29681448  | 0.59632250  |
| C | 1.02260786  | -3.56441668 | 1.39896675  |
| C | 1.99066133  | -4.09733325 | 0.51495857  |
| C | 3.01694389  | -4.87164997 | 1.10030032  |
| C | 3.07318903  | -5.07759001 | 2.48679297  |
| C | 2.10639898  | -4.50625669 | 3.33083941  |

|   |             |             |             |
|---|-------------|-------------|-------------|
| C | 1.05488871  | -3.72835975 | 2.80495436  |
| C | 3.26147207  | -3.10743179 | -1.44530523 |
| C | 1.97780348  | -3.85460020 | -0.99834523 |
| C | 1.81150028  | -5.18724327 | -1.77495839 |
| C | -3.00576507 | -0.84087049 | -4.48543758 |
| C | -3.13264734 | -1.96500490 | -3.42385588 |
| C | -3.24946884 | -3.35499617 | -4.10351617 |
| C | -4.20272140 | -1.56372182 | -1.09050566 |
| C | -4.32346981 | -1.70662492 | -2.49345521 |
| C | -5.62462329 | -1.57613676 | -3.02795499 |
| C | -6.72482708 | -1.29481885 | -2.20480974 |
| C | -6.55420218 | -1.12883117 | -0.81997342 |
| C | -5.28259040 | -1.25649226 | -0.22622252 |
| C | 0.70229153  | -1.89373806 | 4.50741600  |
| C | 0.03726590  | -3.06813725 | 3.74014510  |
| C | -0.60602076 | -4.08271053 | 4.71849460  |
| C | -5.15191618 | 0.50150445  | 1.58442902  |
| C | -5.09717483 | -1.01975917 | 1.27581965  |
| C | -6.12556750 | -1.80190534 | 2.13028949  |
| C | 4.15024124  | 1.10130629  | -0.95046814 |
| C | 4.41946576  | 1.17794256  | -2.34080018 |
| C | 5.72340660  | 0.85288378  | -2.77015522 |
| C | 6.71343246  | 0.46831644  | -1.85131829 |
| C | 6.41387025  | 0.38479278  | -0.48232056 |
| C | 5.12114179  | 0.68700325  | -0.00373660 |
| C | 2.92208638  | 0.33130955  | -4.20107619 |
| C | 3.34335283  | 1.56493462  | -3.35826130 |
| C | 3.79624647  | 2.73205717  | -4.27150949 |
| C | -1.66429160 | 1.57416036  | 3.97588417  |
| C | -0.58807474 | 2.65275941  | 3.68019981  |
| C | 0.00315366  | 3.22822396  | 4.99170879  |
| C | -0.81281624 | 3.85954413  | 1.40911188  |
| C | -1.16918327 | 3.74459108  | 2.77834371  |
| C | -2.10920679 | 4.66209324  | 3.28936801  |
| C | -2.66778846 | 5.65685727  | 2.46956133  |
| C | -2.30629420 | 5.73988391  | 1.11691811  |
| C | -1.38009605 | 4.83619113  | 0.55098087  |
| C | 5.06890258  | -0.88657667 | 1.99772213  |
| C | 4.80551137  | 0.55433398  | 1.48935610  |
| C | 5.60298295  | 1.58898415  | 2.32669165  |
| C | -2.32210280 | 4.73959656  | -1.80951139 |
| C | -1.05023937 | 4.92995996  | -0.94273843 |
| C | -0.34509771 | 6.27001712  | -1.28108090 |
| H | -1.01834488 | -4.43691703 | 0.28737320  |
| H | -2.97113356 | -3.69425369 | -0.67108675 |
| H | 3.41628756  | 3.30019716  | -0.02549727 |
| H | 1.60824409  | 4.33349129  | 0.86243002  |
| H | 3.78138237  | -5.30506796 | 0.46130529  |
| H | 3.87580138  | -5.67543399 | 2.91215519  |
| H | 2.17058074  | -4.66335058 | 4.40404885  |
| H | 1.14104850  | -3.20108839 | -1.27022575 |
| H | -2.19667204 | -1.94761361 | -2.85349053 |

|   |             |             |             |
|---|-------------|-------------|-------------|
| H | 4.17213519  | -3.67887010 | -1.21814758 |
| H | 3.32808177  | -2.12696717 | -0.96109751 |
| H | 3.22776849  | -2.93855660 | -2.52888460 |
| H | 2.65481052  | -5.86965828 | -1.60083232 |
| H | 1.75963416  | -4.98259303 | -2.85155637 |
| H | 0.89072271  | -5.71378489 | -1.48691125 |
| H | -3.88288195 | -0.79650237 | -5.14583938 |
| H | -2.12079995 | -1.02589580 | -5.10708920 |
| H | -2.87704931 | 0.13617006  | -4.00617413 |
| H | -3.30839390 | -4.16670550 | -3.36463514 |
| H | -2.36795306 | -3.53491246 | -4.73148524 |
| H | -4.14056291 | -3.42088450 | -4.74275759 |
| H | -5.76870624 | -1.68040499 | -4.09969754 |
| H | -7.71513520 | -1.19317541 | -2.64237945 |
| H | -7.41364313 | -0.89575777 | -0.19788414 |
| H | -0.76918599 | -2.63313933 | 3.13863953  |
| H | -4.09811858 | -1.36426837 | 1.56843548  |
| H | 1.53211346  | -2.24979441 | 5.13245766  |
| H | -0.03127755 | -1.40501507 | 5.16197570  |
| H | 1.08971712  | -1.14737435 | 3.80512086  |
| H | 0.13428456  | -4.50637446 | 5.40901012  |
| H | -1.07974815 | -4.91503448 | 4.18184168  |
| H | -1.37384666 | -3.58400104 | 5.32417280  |
| H | -4.37326816 | 1.03495521  | 1.02930191  |
| H | -4.99259697 | 0.67749590  | 2.65638796  |
| H | -6.12824223 | 0.92314778  | 1.31023490  |
| H | -7.15040455 | -1.44887767 | 1.95890943  |
| H | -5.90604694 | -1.66338757 | 3.19693090  |
| H | -6.09843071 | -2.87746186 | 1.91134075  |
| H | 5.96477996  | 0.90221078  | -3.82884549 |
| H | 7.71444008  | 0.22755520  | -2.20257466 |
| H | 7.18541973  | 0.07319235  | 0.21779219  |
| H | 2.45316133  | 1.89842070  | -2.81667300 |
| H | 0.21997173  | 2.15113581  | 3.13833832  |
| H | 3.77199203  | -0.06864195 | -4.77191949 |
| H | 2.13362124  | 0.61401640  | -4.91035809 |
| H | 2.52632533  | -0.46232874 | -3.55808482 |
| H | 4.09359741  | 3.61022393  | -3.68327003 |
| H | 2.97092547  | 3.02737381  | -4.93211260 |
| H | 4.64562681  | 2.44801574  | -4.90749806 |
| H | -2.52047990 | 2.00436838  | 4.51407929  |
| H | -1.23836720 | 0.77367137  | 4.59609412  |
| H | -2.02121588 | 1.13305658  | 3.03896065  |
| H | 0.76807525  | 3.98791409  | 4.78491572  |
| H | 0.46899287  | 2.42476925  | 5.57821984  |
| H | -0.76937329 | 3.69046702  | 5.62045427  |
| H | -2.40240126 | 4.60196697  | 4.33446601  |
| H | -3.38748273 | 6.36002229  | 2.88290150  |
| H | -2.75698701 | 6.50338534  | 0.48778064  |
| H | 3.73936367  | 0.75622614  | 1.63489850  |
| H | -0.36618563 | 4.11868823  | -1.20791812 |
| H | 6.12963957  | -1.15787769 | 1.91247332  |



|    |             |             |             |
|----|-------------|-------------|-------------|
| H  | 4.48276084  | -1.61757001 | 1.42866934  |
| H  | 4.78542684  | -0.97158877 | 3.05543700  |
| H  | 5.34288355  | 1.50251026  | 3.39016292  |
| H  | 5.38522196  | 2.61561187  | 2.00528689  |
| H  | 6.68535432  | 1.42991069  | 2.23036900  |
| H  | -2.77966220 | 3.76271840  | -1.61830866 |
| H  | -2.05780720 | 4.77931616  | -2.87402980 |
| H  | -3.06788606 | 5.52194448  | -1.61340249 |
| H  | 0.57574864  | 6.39859306  | -0.69670897 |
| H  | -0.99629333 | 7.12968900  | -1.07327501 |
| H  | -0.07984998 | 6.29827683  | -2.34597477 |
| O  | -0.20602307 | -1.49959395 | -1.87420960 |
| O  | -0.04265427 | 1.67753454  | -2.40060876 |
| O  | 1.93055146  | 0.36131341  | -0.58859724 |
| O  | 0.11633224  | -1.42472277 | 0.93642216  |
| Zr | -0.15770532 | 0.03061035  | -0.83939309 |

$\eta^2$ -ozone Complex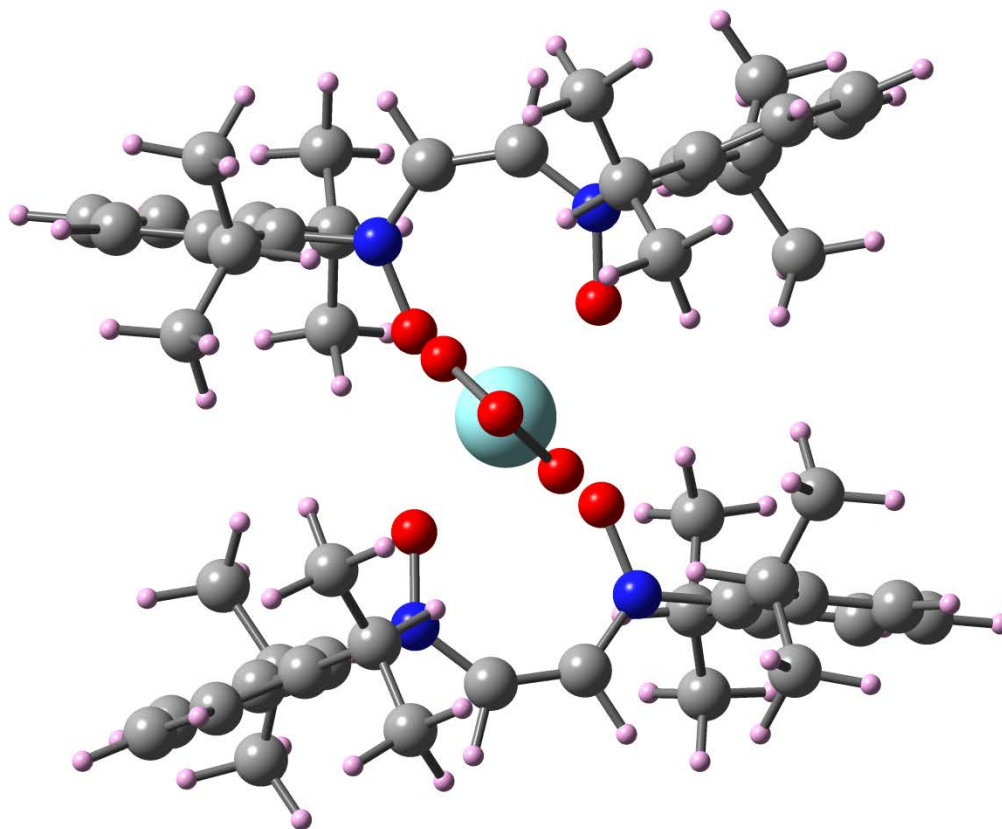Fig. S141: ONCCNO  $\eta^2$ -ozone Complex

| SCF          | E <sub>ZP</sub> | H            | G            |
|--------------|-----------------|--------------|--------------|
| -2816.589395 | -2815.431892    | -2815.358608 | -2815.550471 |

|   |             |             |             |
|---|-------------|-------------|-------------|
| O | -1.79520700 | 1.09356900  | 0.04079300  |
| O | 1.79514100  | -1.09354500 | 0.04074800  |
| O | 0.51571900  | 1.03680400  | -2.04737700 |
| N | -0.88638500 | -2.99802000 | 0.64807600  |
| N | 2.23262000  | -2.36870800 | -0.24919400 |
| N | 0.88634100  | 2.99804600  | 0.64794000  |
| N | -2.23266900 | 2.36872100  | -0.24925800 |
| C | 0.17761400  | -3.77171400 | 0.30274800  |
| C | 1.49752000  | -3.50329500 | -0.08312500 |
| C | -0.17764900 | 3.77173500  | 0.30257200  |
| C | -1.49756900 | 3.50331400  | -0.08325100 |
| C | -2.17454000 | -3.57697000 | 0.99377300  |
| C | -2.46417900 | -3.80068100 | 2.36406900  |
| C | -3.71683300 | -4.36574200 | 2.67939200  |
| C | -4.63735300 | -4.68720100 | 1.66793100  |
| C | -4.33019500 | -4.43342500 | 0.32222200  |

|   |             |             |             |
|---|-------------|-------------|-------------|
| C | -3.09422100 | -3.85961400 | -0.04684700 |
| C | -2.00368500 | -2.14088400 | 4.21575400  |
| C | -1.48842100 | -3.40493200 | 3.47543500  |
| C | -1.22222000 | -4.56353300 | 4.46861100  |
| C | 4.66920300  | -0.82561300 | 2.29049000  |
| C | 4.30886000  | -2.25374400 | 1.79980200  |
| C | 5.00685900  | -3.33424000 | 2.66344900  |
| C | 3.62185300  | -2.43354800 | -0.68184200 |
| C | 4.63401400  | -2.39961500 | 0.31080700  |
| C | 5.97283600  | -2.46275000 | -0.12609400 |
| C | 6.28092500  | -2.55236900 | -1.49386500 |
| C | 5.25629900  | -2.56410200 | -2.45275800 |
| C | 3.89910500  | -2.49126300 | -2.07021400 |
| C | -3.85420200 | -2.59888700 | -2.11982200 |
| C | -2.79420800 | -3.55635700 | -1.51742300 |
| C | -2.69285800 | -4.86267900 | -2.34873200 |
| C | 3.00213600  | -1.30511600 | -4.13658900 |
| C | 2.79875500  | -2.47175800 | -3.13609100 |
| C | 2.72264500  | -3.83094900 | -3.88142800 |
| C | 2.17458600  | 3.57698100  | 0.99331100  |
| C | 3.09419300  | 3.85906100  | -0.04752200 |
| C | 4.33029200  | 4.43284200  | 0.32117200  |
| C | 4.63763000  | 4.68711900  | 1.66674700  |
| C | 3.71718500  | 4.36617500  | 2.67844200  |
| C | 2.46442300  | 3.80114700  | 2.36349000  |
| C | 3.85372000  | 2.59711700  | -2.11995200 |
| C | 2.79398800  | 3.55511100  | -1.51792100 |
| C | 2.69279400  | 4.86102700  | -2.34989300 |
| C | -4.66915000 | 0.82490700  | 2.29014000  |
| C | -4.30885700 | 2.25315000  | 1.79973800  |
| C | -5.00683600 | 3.33345400  | 2.66364400  |
| C | -3.62190900 | 2.43354400  | -0.68187600 |
| C | -4.63405300 | 2.39933400  | 0.31078100  |
| C | -5.97288600 | 2.46240100  | -0.12609700 |
| C | -6.28099600 | 2.55229600  | -1.49384700 |
| C | -5.25638000 | 2.56437200  | -2.45274700 |
| C | -3.89917700 | 2.49157100  | -2.07022900 |
| C | 2.00382100  | 2.14220900  | 4.21592100  |
| C | 1.48870900  | 3.40603500  | 3.47512000  |
| C | 1.22282100  | 4.56510700  | 4.46782900  |
| C | -3.00203700 | 1.30616600  | -4.13695600 |
| C | -2.79881800 | 2.47253100  | -3.13610500 |
| C | -2.72287700 | 3.83196100  | -3.88102500 |
| H | -0.07196600 | -4.82745100 | 0.31913600  |
| H | 2.07640000  | -4.39043900 | -0.31697300 |
| H | 0.07196500  | 4.82746600  | 0.31883200  |
| H | -2.07643100 | 4.39044700  | -0.31719000 |
| H | -3.97482200 | -4.55421300 | 3.71829100  |
| H | -5.59724100 | -5.12635000 | 1.93034500  |
| H | -5.05832500 | -4.67111500 | -0.44893300 |
| H | -0.53102800 | -3.13610600 | 3.01514100  |
| H | 3.22761500  | -2.37216600 | 1.93092200  |

|   |             |             |             |
|---|-------------|-------------|-------------|
| H | -2.96641000 | -2.33497900 | 4.70768400  |
| H | -2.13661000 | -1.31107500 | 3.51238800  |
| H | -1.28445200 | -1.83062100 | 4.98576300  |
| H | -2.13012700 | -4.84539600 | 5.01759600  |
| H | -0.47002600 | -4.25971800 | 5.20851800  |
| H | -0.85092700 | -5.45761600 | 3.95127100  |
| H | 5.74504400  | -0.63050900 | 2.18496800  |
| H | 4.40564100  | -0.70934100 | 3.35056400  |
| H | 4.12248800  | -0.07085600 | 1.71457600  |
| H | 4.75084500  | -4.34630300 | 2.32383400  |
| H | 4.69575800  | -3.23635600 | 3.71195700  |
| H | 6.09975900  | -3.23565600 | 2.63351100  |
| H | 6.77720700  | -2.43991800 | 0.60452200  |
| H | 7.31986100  | -2.60369900 | -1.81180600 |
| H | 5.51000800  | -2.61712400 | -3.50820900 |
| H | -1.83430700 | -3.03654500 | -1.59230500 |
| H | 1.83191700  | -2.30182300 | -2.65184600 |
| H | -4.85357100 | -3.05507300 | -2.13972400 |
| H | -3.57548200 | -2.34184400 | -3.14921800 |
| H | -3.90951400 | -1.66739800 | -1.54478200 |
| H | -3.64311300 | -5.41403900 | -2.34912100 |
| H | -1.91665200 | -5.53179100 | -1.95382000 |
| H | -2.43891100 | -4.62536200 | -3.38978500 |
| H | 3.01951900  | -0.34288200 | -3.61366500 |
| H | 2.16626600  | -1.27806300 | -4.84548100 |
| H | 3.93515300  | -1.41512300 | -4.70658800 |
| H | 3.65656400  | -4.04570800 | -4.41847800 |
| H | 1.90697100  | -3.81043900 | -4.61547200 |
| H | 2.53521800  | -4.66179900 | -3.18800600 |
| H | 5.05838300  | 4.67009300  | -0.45015500 |
| H | 5.59760800  | 5.12624000  | 1.92887800  |
| H | 3.97531500  | 4.55503500  | 3.71723700  |
| H | 1.83397700  | 3.03544200  | -1.59242100 |
| H | -3.22760800 | 2.37156300  | 1.93084300  |
| H | 4.85317000  | 3.05310200  | -2.14023400 |
| H | 3.57482100  | 2.33957100  | -3.14917400 |
| H | 3.90893600  | 1.66592700  | -1.54441700 |
| H | 1.91675900  | 5.53049000  | -1.95524400 |
| H | 2.43869200  | 4.62322500  | -3.39079800 |
| H | 3.64315300  | 5.41220600  | -2.35066500 |
| H | -5.74498900 | 0.62980400  | 2.18461000  |
| H | -4.40555200 | 0.70841500  | 3.35018200  |
| H | -4.12243700 | 0.07028400  | 1.71405000  |
| H | -4.75088900 | 4.34559300  | 2.32420400  |
| H | -4.69565100 | 3.23538400  | 3.71211100  |
| H | -6.09973300 | 3.23483100  | 2.63377300  |
| H | -6.77724900 | 2.43931500  | 0.60452000  |
| H | -7.31994100 | 2.60359100  | -1.81176700 |
| H | -5.51010100 | 2.61763800  | -3.50818400 |
| H | 0.53122100  | 3.13718300  | 3.01504000  |
| H | -1.83196300 | 2.30258000  | -2.65190400 |
| H | 2.96664600  | 2.33632600  | 4.70765000  |

|    |             |             |             |
|----|-------------|-------------|-------------|
| H  | 2.13649600  | 1.31207400  | 3.51289500  |
| H  | 1.28462200  | 1.83241700  | 4.98615000  |
| H  | 0.47067000  | 4.26173500  | 5.20796200  |
| H  | 0.85160800  | 5.45902500  | 3.95014700  |
| H  | 2.13084400  | 4.84706200  | 5.01657700  |
| H  | -3.01925400 | 0.34377300  | -3.61432600 |
| H  | -2.16618300 | 1.27946200  | -4.84588200 |
| H  | -3.93509000 | 1.41619900  | -4.70689200 |
| H  | -2.53561800 | 4.66262800  | -3.18733600 |
| H  | -3.65680100 | 4.04673600  | -4.41805900 |
| H  | -1.90716000 | 3.81180400  | -4.61502900 |
| O  | -0.00027400 | 0.00012300  | -3.01922900 |
| O  | -0.51577500 | -1.03680100 | -2.04737600 |
| O  | 0.83644800  | 1.61819800  | 0.73067100  |
| O  | -0.83647200 | -1.61816300 | 0.73074500  |
| Zr | -0.00002600 | 0.00000900  | -0.29060800 |

**Oxo Complex with weakly adsorbed O<sub>2</sub> molecule**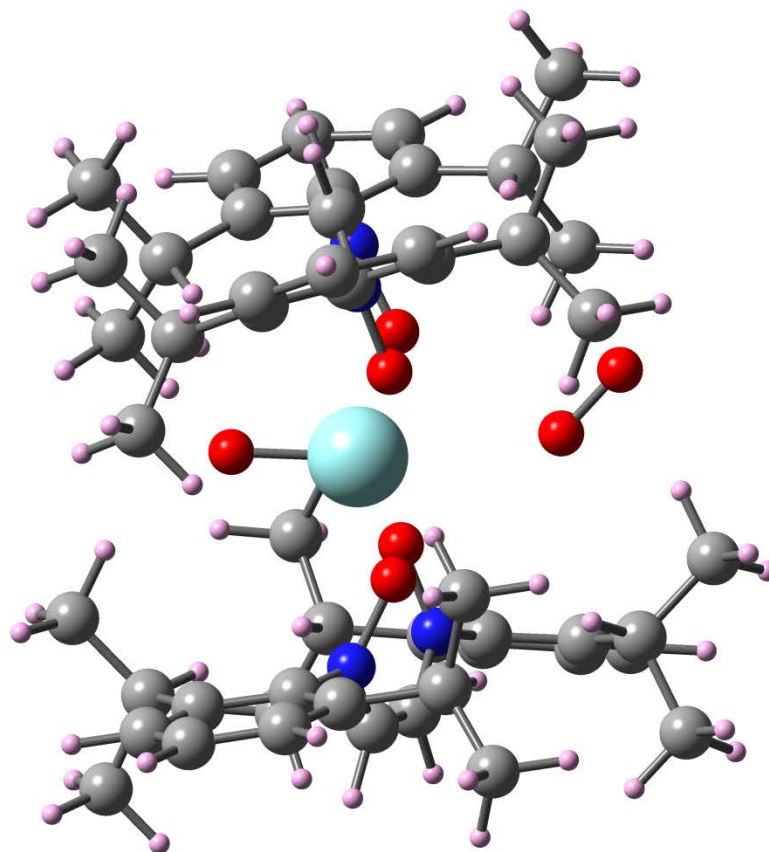Fig. S142: ONCCNO Oxo Complex with weakly adsorbed O<sub>2</sub> molecule

| SCF          | E <sub>ZP</sub> | H            | G            |
|--------------|-----------------|--------------|--------------|
| -2816.604669 | -2815.449241    | -2815.374298 | -2815.572113 |

|    |             |             |             |
|----|-------------|-------------|-------------|
| Zr | 0.01620200  | -0.03518800 | -0.19227100 |
| O  | -0.90642000 | -1.84334500 | 0.51503000  |
| O  | 1.10547400  | 1.78325300  | 0.15706300  |
| O  | 0.26281600  | 1.13836700  | 3.63125100  |
| O  | 0.36352700  | 0.24786900  | 2.72943900  |
| N  | -2.17810500 | 2.31623100  | 0.32801400  |
| N  | 0.96811700  | 3.03520900  | -0.41185700 |
| N  | 2.20431500  | -2.50033500 | 0.41949500  |
| N  | -0.92017700 | -3.08409000 | -0.12023300 |
| C  | -1.52876200 | 3.42712000  | -0.11781700 |
| C  | -0.19929800 | 3.73115000  | -0.44628700 |
| C  | 1.49714600  | -3.65802700 | 0.25210100  |
| C  | 0.16027400  | -3.91078900 | -0.07040100 |
| C  | -3.62008800 | 2.33990000  | 0.53684700  |
| C  | -4.46263700 | 2.01770500  | -0.55622900 |
| C  | -5.85545600 | 2.07886200  | -0.33772900 |

|   |             |             |             |
|---|-------------|-------------|-------------|
| C | -6.37587400 | 2.42027400  | 0.92088500  |
| C | -5.51344600 | 2.69879500  | 1.99355600  |
| C | -4.11319900 | 2.65994600  | 1.82596600  |
| C | -4.47964500 | 0.25685200  | -2.39774800 |
| C | -3.91105000 | 1.62029500  | -1.92885200 |
| C | -4.19538500 | 2.72434900  | -2.98221500 |
| C | 2.19459200  | 1.85764900  | -4.18368800 |
| C | 1.48255300  | 2.91580600  | -3.30343300 |
| C | 0.78431400  | 3.98419200  | -4.18657200 |
| C | 2.20427400  | 3.61279400  | -0.91723600 |
| C | 2.45148000  | 3.57067800  | -2.31270200 |
| C | 3.65001500  | 4.15802400  | -2.77282600 |
| C | 4.56745000  | 4.72871400  | -1.87685500 |
| C | 4.30990500  | 4.72045600  | -0.49584400 |
| C | 3.12096700  | 4.16126900  | 0.01558000  |
| C | -3.33278900 | 1.80709400  | 4.08026200  |
| C | -3.18576400 | 2.92554500  | 3.01467800  |
| C | -3.43062500 | 4.32393500  | 3.63717300  |
| C | 3.76874600  | 3.03583300  | 2.18430600  |
| C | 2.86805800  | 4.11523500  | 1.52466000  |
| C | 3.06526500  | 5.49510400  | 2.20053000  |
| C | 3.59681700  | -2.53668300 | 0.84041700  |
| C | 3.88764300  | -2.61331000 | 2.22550000  |
| C | 5.24608100  | -2.67877700 | 2.60235600  |
| C | 6.26551900  | -2.64263300 | 1.63814100  |
| C | 5.94715400  | -2.53595600 | 0.27450300  |
| C | 4.60510700  | -2.47885100 | -0.15504200 |
| C | 3.01080200  | -1.50661700 | 4.34668800  |
| C | 2.79054400  | -2.62337500 | 3.29439100  |
| C | 2.69030700  | -4.01192800 | 3.98058300  |
| C | -1.53794000 | -2.31667700 | -4.07684100 |
| C | -1.19175200 | -3.43515600 | -3.05993900 |
| C | -0.81024800 | -4.75461400 | -3.78356500 |
| C | -2.19926700 | -3.49892100 | -0.66129900 |
| C | -2.33538000 | -3.66779500 | -2.06534300 |
| C | -3.60129300 | -4.06318300 | -2.55035700 |
| C | -4.68486600 | -4.25751800 | -1.68178200 |
| C | -4.52443300 | -4.06794900 | -0.29896600 |
| C | -3.27963500 | -3.69149300 | 0.24284500  |
| C | 4.78576200  | -0.98806900 | -2.19663400 |
| C | 4.27841400  | -2.34615300 | -1.64475800 |
| C | 4.85335300  | -3.52982200 | -2.46510800 |
| C | -3.84728400 | -2.19774100 | 2.20871700  |
| C | -3.12812300 | -3.49561400 | 1.75445900  |
| C | -3.63384400 | -4.72385900 | 2.55341000  |
| H | -2.21569200 | 4.25251400  | -0.27247500 |
| H | -0.06097100 | 4.73572500  | -0.83168000 |
| H | 2.11719000  | -4.54025000 | 0.37473800  |
| H | -0.07313600 | -4.94106100 | -0.32000900 |
| H | -6.53443900 | 1.84778300  | -1.15442300 |
| H | -7.45281500 | 2.45956900  | 1.06837700  |
| H | -5.92966100 | 2.94433500  | 2.96747100  |

|   |             |             |             |
|---|-------------|-------------|-------------|
| H | -2.82540000 | 1.49837500  | -1.85627500 |
| H | 0.70929600  | 2.37654100  | -2.74713300 |
| H | -5.56481700 | 0.30205800  | -2.56262500 |
| H | -4.27620700 | -0.53070300 | -1.66306000 |
| H | -4.00598800 | -0.03582200 | -3.34287000 |
| H | -5.27476800 | 2.87593300  | -3.11907500 |
| H | -3.76675200 | 2.43930300  | -3.95170900 |
| H | -3.75547000 | 3.68584200  | -2.68624100 |
| H | 2.95362300  | 2.30893600  | -4.83716800 |
| H | 1.45610300  | 1.34994100  | -4.81612900 |
| H | 2.67867100  | 1.09654000  | -3.56144100 |
| H | 0.22670000  | 4.70812800  | -3.57769200 |
| H | 0.07669600  | 3.50097900  | -4.87259800 |
| H | 1.51352700  | 4.54348200  | -4.78864700 |
| H | 3.87166600  | 4.15342900  | -3.83681400 |
| H | 5.48754300  | 5.17053300  | -2.25283000 |
| H | 5.03645300  | 5.15162800  | 0.18772800  |
| H | -2.14958100 | 2.89492700  | 2.66172000  |
| H | 1.83014100  | 3.80755400  | 1.69239800  |
| H | -4.34801800 | 1.78519200  | 4.49882200  |
| H | -2.62814300 | 1.97432300  | 4.90538700  |
| H | -3.12105200 | 0.82501100  | 3.64201500  |
| H | -4.44475000 | 4.41017600  | 4.04884000  |
| H | -3.30122000 | 5.12101900  | 2.89349800  |
| H | -2.72172500 | 4.50252100  | 4.45631700  |
| H | 3.58222900  | 2.05485100  | 1.73368500  |
| H | 3.55679000  | 2.96995800  | 3.25999000  |
| H | 4.83298100  | 3.27896300  | 2.06124600  |
| H | 4.10618200  | 5.83760700  | 2.13258100  |
| H | 2.80874000  | 5.43038200  | 3.26616800  |
| H | 2.42765100  | 6.26176100  | 1.74135400  |
| H | 5.50703300  | -2.74661700 | 3.65540100  |
| H | 7.30666700  | -2.69001700 | 1.94916000  |
| H | 6.74636900  | -2.49688800 | -0.46139500 |
| H | 1.83078800  | -2.42325100 | 2.80578000  |
| H | -0.31052200 | -3.08794100 | -2.51244000 |
| H | 3.92682700  | -1.67252600 | 4.92879300  |
| H | 2.16846500  | -1.48220700 | 5.05018500  |
| H | 3.08507200  | -0.52324500 | 3.86755400  |
| H | 2.47549600  | -4.80368100 | 3.25158200  |
| H | 1.88589300  | -4.01063100 | 4.72793000  |
| H | 3.62732300  | -4.27002400 | 4.49189100  |
| H | -2.45995100 | -2.53973000 | -4.63110800 |
| H | -0.72227000 | -2.21363800 | -4.80544600 |
| H | -1.63928300 | -1.35642400 | -3.56062300 |
| H | -0.53983400 | -5.54454700 | -3.06970200 |
| H | 0.04725200  | -4.58636200 | -4.44821800 |
| H | -1.64070300 | -5.12930800 | -4.39669000 |
| H | -3.74001300 | -4.20425300 | -3.61908900 |
| H | -5.65315200 | -4.55196800 | -2.08024400 |
| H | -5.37110200 | -4.22223600 | 0.36477600  |
| H | 3.19043200  | -2.35132000 | -1.76446700 |



|   |             |             |             |
|---|-------------|-------------|-------------|
| H | -2.06586800 | -3.36283300 | 1.98131600  |
| H | 5.87900500  | -0.90905400 | -2.12382300 |
| H | 4.34294600  | -0.15433700 | -1.64014700 |
| H | 4.50892400  | -0.88192600 | -3.25387800 |
| H | 4.56358300  | -3.43342000 | -3.51974100 |
| H | 4.47873500  | -4.49324900 | -2.09524600 |
| H | 5.95016800  | -3.55666800 | -2.42164400 |
| H | -3.42688000 | -1.32846600 | 1.69228100  |
| H | -3.72018700 | -2.05295300 | 3.29046100  |
| H | -4.92456500 | -2.24419900 | 1.99741300  |
| H | -3.12785900 | -5.64511900 | 2.23588500  |
| H | -4.71463900 | -4.87479300 | 2.43341700  |
| H | -3.43889700 | -4.57858600 | 3.62438300  |
| O | -0.33492800 | 0.06237400  | -1.97357900 |
| O | -1.57886400 | 1.12030600  | 0.65378000  |
| O | 1.75830400  | -1.25676500 | 0.03229500  |

### 10.5 Structures with eight oxygen atoms

#### Oxo Complex with adsorbed ozone group (conformation 1 lower energy)

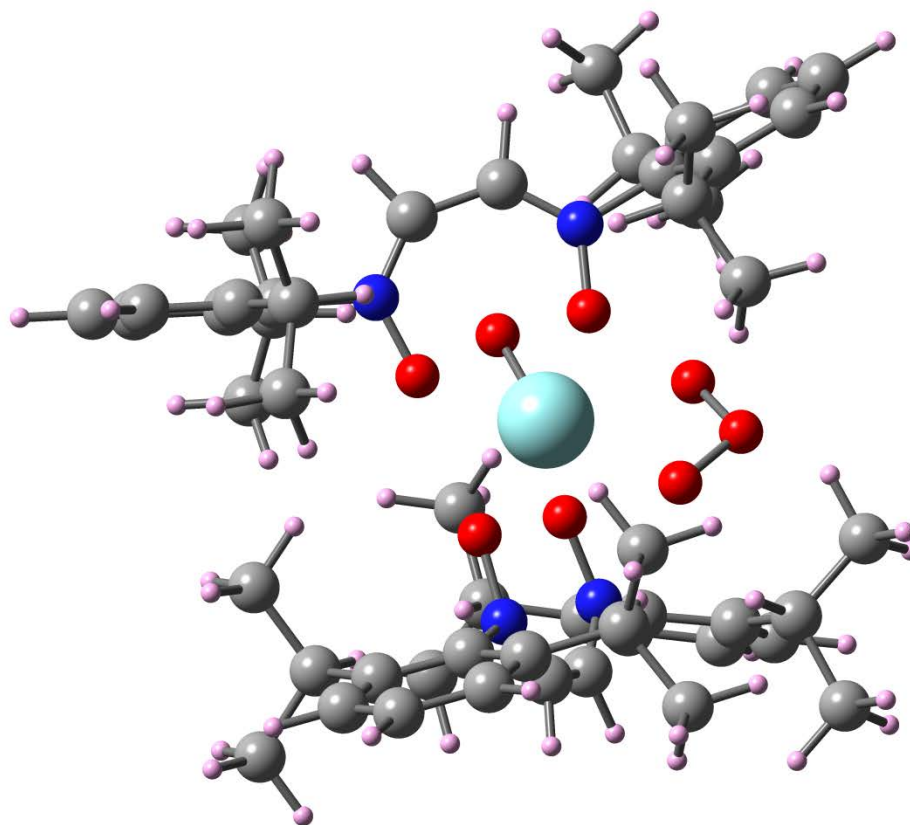

Fig. S143: ONCCNO Oxo Complex with adsorbed ozone group (conformation 1 lower energy)

| SCF          | E <sub>ZP</sub> | H            | G            |
|--------------|-----------------|--------------|--------------|
| -2891.748948 | -2890.587303    | -2890.513003 | -2890.704289 |

|   |             |             |             |
|---|-------------|-------------|-------------|
| O | 0.06584578  | -1.65904609 | 0.55993429  |
| O | -1.07419361 | 1.91116183  | 0.80471832  |
| O | 1.66512317  | 2.22932680  | 0.38057256  |
| N | -2.85510920 | 0.17482018  | -1.20942523 |
| N | -1.61699092 | 2.89513821  | 0.05449789  |
| N | 3.27888754  | -1.10366119 | -0.22699267 |
| N | 0.77617975  | -2.49102515 | 1.40144657  |
| C | -3.07279800 | 1.47270390  | -1.42807055 |
| C | -2.49847508 | 2.67801992  | -0.91004342 |
| C | 3.18626504  | -2.12187223 | 0.67190119  |
| C | 2.12397286  | -2.70162146 | 1.37106253  |
| C | -3.72333901 | -0.79525859 | -1.90894933 |
| C | -3.34949296 | -1.19332754 | -3.21321114 |
| C | -4.20535575 | -2.11015470 | -3.86125061 |

|   |             |             |             |
|---|-------------|-------------|-------------|
| C | -5.35294316 | -2.60704615 | -3.22328477 |
| C | -5.66947825 | -2.20760555 | -1.91445406 |
| C | -4.85439543 | -1.29013023 | -1.21913121 |
| C | -1.14125095 | -1.86117521 | -4.27197007 |
| C | -2.08223989 | -0.68350370 | -3.90785287 |
| C | -2.43213728 | 0.15047224  | -5.16820496 |
| C | 1.57368667  | 4.58400823  | -2.02577667 |
| C | 0.03400099  | 4.46404540  | -1.88364722 |
| C | -0.68290559 | 5.18897322  | -3.05461369 |
| C | -1.21012062 | 4.26440935  | 0.40012296  |
| C | -0.44084666 | 5.00875476  | -0.53025717 |
| C | -0.08801868 | 6.32112003  | -0.14577077 |
| C | -0.45900833 | 6.84157014  | 1.10198778  |
| C | -1.19780316 | 6.06055183  | 2.00574861  |
| C | -1.59439265 | 4.74950381  | 1.67696138  |
| C | -5.00889520 | -2.11813515 | 1.17081000  |
| C | -5.18501310 | -0.90010607 | 0.22485460  |
| C | -6.60716351 | -0.29592807 | 0.34878629  |
| C | -1.45383473 | 3.43043063  | 3.83105877  |
| C | -2.38651935 | 3.91236551  | 2.68693097  |
| C | -3.61278254 | 4.67626733  | 3.24818954  |
| C | 4.55530818  | -0.74609359 | -0.82766479 |
| C | 5.48221280  | 0.01794605  | -0.07554921 |
| C | 6.71630653  | 0.32904722  | -0.68713593 |
| C | 6.99642032  | -0.07666744 | -2.00017101 |
| C | 6.04466355  | -0.80513459 | -2.73313046 |
| C | 4.80533813  | -1.15953031 | -2.16271618 |
| C | 5.26988603  | 2.07400431  | 1.40361548  |
| C | 5.18735156  | 0.52674381  | 1.33893557  |
| C | 6.13551397  | -0.12165532 | 2.38216269  |
| C | -1.82215976 | -4.37611796 | -0.59669902 |
| C | -0.54899447 | -4.78762517 | 0.19017154  |
| C | -0.20947260 | -6.28202145 | -0.03521604 |
| C | -0.07261817 | -3.31360521 | 2.25356958  |
| C | -0.71010622 | -4.44063343 | 1.67254346  |
| C | -1.53930936 | -5.22051527 | 2.50439459  |
| C | -1.71899063 | -4.89109972 | 3.85855950  |
| C | -1.08158752 | -3.76586946 | 4.40297877  |
| C | -0.25188223 | -2.94363604 | 3.60925754  |
| C | 3.07330821  | -0.97075636 | -3.99404931 |
| C | 3.76503526  | -1.92616518 | -2.98392543 |
| C | 4.36797411  | -3.15923098 | -3.70181533 |
| C | -0.65360386 | -0.72373029 | 4.78579238  |
| C | 0.40594728  | -1.70268752 | 4.21809587  |
| C | 1.43782558  | -2.09188167 | 5.30931773  |
| H | -3.86373652 | 1.64545030  | -2.14915738 |
| H | -2.87477298 | 3.58318983  | -1.37229278 |
| H | 4.15508797  | -2.55726486 | 0.89317727  |
| H | 2.42208938  | -3.49191477 | 2.05214937  |
| H | -3.96364690 | -2.44102059 | -4.86761889 |
| H | -5.99649911 | -3.31336326 | -3.74238988 |
| H | -6.55172632 | -2.61361784 | -1.42698257 |

|   |             |             |             |
|---|-------------|-------------|-------------|
| H | -1.51535315 | -0.03574758 | -3.22856784 |
| H | -0.18570719 | 3.39329567  | -1.95388014 |
| H | -1.60021984 | -2.54424444 | -5.00014987 |
| H | -0.87364008 | -2.43733778 | -3.37815991 |
| H | -0.21519191 | -1.46769395 | -4.70828980 |
| H | -2.95826146 | -0.45205623 | -5.92154083 |
| H | -1.51184579 | 0.53637895  | -5.62395626 |
| H | -3.07023149 | 1.00963440  | -4.92008392 |
| H | 1.90767072  | 5.63069459  | -2.04056223 |
| H | 1.88952652  | 4.11466392  | -2.96607457 |
| H | 2.07294920  | 4.06254547  | -1.20292288 |
| H | -1.77600996 | 5.08109192  | -3.00157687 |
| H | -0.34898318 | 4.76905142  | -4.01189474 |
| H | -0.45745783 | 6.26409340  | -3.05914286 |
| H | 0.50254438  | 6.92883057  | -0.82524088 |
| H | -0.16455693 | 7.85195668  | 1.37573377  |
| H | -1.47008447 | 6.47320055  | 2.97300207  |
| H | -4.47186764 | -0.13781027 | 0.55944449  |
| H | -2.76068608 | 3.01224437  | 2.18722357  |
| H | -5.70132965 | -2.92919742 | 0.90871598  |
| H | -5.21089820 | -1.82294725 | 2.20869300  |
| H | -3.98651592 | -2.50808494 | 1.11952194  |
| H | -7.38080520 | -1.02602284 | 0.07846726  |
| H | -6.73086272 | 0.57954310  | -0.30215651 |
| H | -6.79449427 | 0.01813272  | 1.38382746  |
| H | -0.62960418 | 2.83261870  | 3.42940093  |
| H | -2.01663056 | 2.81061669  | 4.54194932  |
| H | -1.03278462 | 4.28285021  | 4.38123530  |
| H | -3.31457144 | 5.55029066  | 3.84083820  |
| H | -4.19219502 | 4.01616906  | 3.90703246  |
| H | -4.27467193 | 5.02447031  | 2.44416986  |
| H | 7.45302212  | 0.90771886  | -0.13564196 |
| H | 7.95012605  | 0.18096370  | -2.45539930 |
| H | 6.26899904  | -1.10467269 | -3.75335443 |
| H | 4.16175375  | 0.25279815  | 1.60491982  |
| H | 0.27858206  | -4.19484978 | -0.21427525 |
| H | 6.28315061  | 2.43493488  | 1.18096548  |
| H | 4.99937214  | 2.42155571  | 2.40900049  |
| H | 4.57320156  | 2.53003858  | 0.69164325  |
| H | 6.05717669  | -1.21703912 | 2.37240412  |
| H | 5.88409519  | 0.22865228  | 3.39185573  |
| H | 7.18383966  | 0.14026836  | 2.18569409  |
| H | -2.70515129 | -4.91782390 | -0.22968514 |
| H | -1.70195099 | -4.60951529 | -1.66358075 |
| H | -1.99880239 | -3.30019976 | -0.49586927 |
| H | 0.68767693  | -6.57917173 | 0.52342750  |
| H | -0.02425711 | -6.46670140 | -1.10169804 |
| H | -1.03262927 | -6.93966272 | 0.27363609  |
| H | -2.04335585 | -6.09136143 | 2.09316269  |
| H | -2.35782228 | -5.50890064 | 4.48594602  |
| H | -1.23527190 | -3.51622955 | 5.44988467  |
| H | 2.98495941  | -2.28573796 | -2.30423424 |

|    |             |             |             |
|----|-------------|-------------|-------------|
| H  | 0.94226380  | -1.16274327 | 3.43310957  |
| H  | 3.80473829  | -0.53578714 | -4.68948907 |
| H  | 2.56187712  | -0.16082766 | -3.46368155 |
| H  | 2.32774777  | -1.52100226 | -4.58473735 |
| H  | 3.57149066  | -3.72509044 | -4.20312024 |
| H  | 4.87119817  | -3.83105075 | -2.99404768 |
| H  | 5.09727720  | -2.87005283 | -4.46990034 |
| H  | -1.37077739 | -0.43303041 | 4.00891901  |
| H  | -0.16066869 | 0.18730637  | 5.14740486  |
| H  | -1.21037619 | -1.16728533 | 5.62278815  |
| H  | 2.21785709  | -2.75089256 | 4.90574055  |
| H  | 0.95849181  | -2.61407921 | 6.14855708  |
| H  | 1.92556003  | -1.19147941 | 5.70485301  |
| O  | -0.06622571 | 1.06646245  | -1.84364490 |
| O  | 1.87404774  | 1.97592893  | 1.76227449  |
| O  | 1.27441254  | 0.75046392  | 2.09865089  |
| O  | 2.19979849  | -0.42961339 | -0.75961206 |
| O  | -1.92617966 | -0.38213339 | -0.43750900 |
| Zr | 0.32755716  | 0.38821129  | -0.18340973 |

**Oxo Complex with adsorbed ozone group (conformation 2 higher energy)**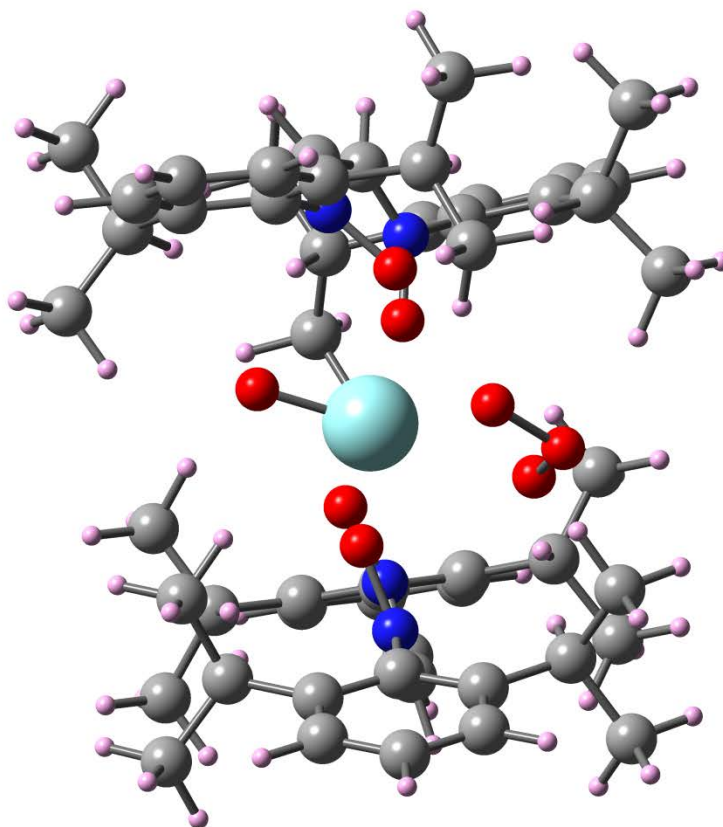

Fig. S144: ONCCNO Oxo Complex with adsorbed ozone group (conformation 2 higher energy)

| SCF          | $E_{ZP}$     | H            | G            |
|--------------|--------------|--------------|--------------|
| -2891.740131 | -2890.578941 | -2890.504264 | -2890.696996 |

|   |             |             |             |
|---|-------------|-------------|-------------|
| O | 2.28300512  | -0.86803321 | 0.15502137  |
| O | -1.73949325 | 0.74264793  | -0.14350497 |
| O | 0.03225249  | -1.12847331 | -2.12264092 |
| N | -0.26342987 | 3.52256619  | 0.31497276  |
| N | -2.69967602 | 1.66216156  | -0.20368137 |
| N | -0.29512476 | -2.93106423 | 0.52722255  |
| N | 2.80672551  | -2.07494689 | -0.24030552 |
| C | -1.53210626 | 3.70426308  | 0.68123973  |
| C | -2.64243554 | 2.92146364  | 0.24101400  |
| C | 0.81714515  | -3.61291797 | 0.12238538  |
| C | 2.13122228  | -3.25855690 | -0.19204603 |
| C | 0.82093054  | 4.36510849  | 0.81983486  |
| C | 1.06173512  | 4.45215740  | 2.21960499  |
| C | 2.13563614  | 5.27280460  | 2.62498063  |
| C | 2.93441892  | 5.95052927  | 1.69378220  |
| C | 2.66735725  | 5.83983597  | 0.32107657  |

|   |             |             |             |
|---|-------------|-------------|-------------|
| C | 1.60040216  | 5.05257144  | -0.15439976 |
| C | 1.16415746  | 2.90166982  | 4.24415291  |
| C | 0.25087864  | 3.72146397  | 3.29861702  |
| C | -0.62162618 | 4.72624814  | 4.09979286  |
| C | -4.83808750 | -1.07782197 | 1.96450153  |
| C | -4.70218560 | 0.40895993  | 1.54879071  |
| C | -5.67514379 | 1.30358806  | 2.36270697  |
| C | -3.95680803 | 1.18143844  | -0.80601788 |
| C | -4.91891267 | 0.58663417  | 0.04274166  |
| C | -6.11838440 | 0.15586672  | -0.56215187 |
| C | -6.32092212 | 0.29708643  | -1.94449990 |
| C | -5.32552913 | 0.86359431  | -2.75658996 |
| C | -4.10863855 | 1.31870023  | -2.20598018 |
| C | 2.41438099  | 4.19520998  | -2.40374880 |
| C | 1.32336709  | 5.01466720  | -1.66381576 |
| C | 1.19986876  | 6.44349693  | -2.25565957 |
| C | -2.50945497 | 0.82936875  | -4.11623191 |
| C | -3.01757373 | 1.89825732  | -3.11182521 |
| C | -3.51381939 | 3.16821761  | -3.85121930 |
| C | -1.51608355 | -3.65615568 | 0.84437861  |
| C | -2.38070727 | -4.04727524 | -0.20876902 |
| C | -3.54327539 | -4.77011797 | 0.13878707  |
| C | -3.83759655 | -5.06868668 | 1.47785297  |
| C | -2.97109928 | -4.65177415 | 2.50210984  |
| C | -1.78966841 | -3.94013928 | 2.20851960  |
| C | -3.25892464 | -2.92046260 | -2.31559187 |
| C | -2.09422794 | -3.71848797 | -1.67669719 |
| C | -1.79990788 | -5.00617556 | -2.49094025 |
| C | 4.73677112  | -0.21078193 | 2.44677890  |
| C | 4.62823531  | -1.69614175 | 2.00792051  |
| C | 5.37312973  | -2.62764803 | 2.99697791  |
| C | 4.23445580  | -2.03565698 | -0.52417420 |
| C | 5.12447866  | -1.86121887 | 0.56854667  |
| C | 6.50360823  | -1.81128049 | 0.28087679  |
| C | 6.97339312  | -1.93669097 | -1.03714183 |
| C | 6.06890198  | -2.09981593 | -2.09667495 |
| C | 4.67623640  | -2.13984748 | -1.86623315 |
| C | -1.52159619 | -2.38190383 | 4.19060173  |
| C | -0.85697537 | -3.49562790 | 3.33913900  |
| C | -0.41743498 | -4.68857919 | 4.22596024  |
| C | 3.87324657  | -1.07578964 | -4.02931767 |
| C | 3.71433694  | -2.26892160 | -3.05123487 |
| C | 3.90435288  | -3.62010204 | -3.78972726 |
| H | -1.74213398 | 4.58121413  | 1.27978286  |
| H | -3.60884313 | 3.41390893  | 0.26162632  |
| H | 0.61384310  | -4.67341932 | 0.01427126  |
| H | 2.76173387  | -4.09489959 | -0.47471415 |
| H | 2.36000862  | 5.36205824  | 3.68353649  |
| H | 3.76468033  | 6.56317841  | 2.03696151  |
| H | 3.28814552  | 6.37680355  | -0.39012668 |
| H | -0.39407612 | 2.98160210  | 2.81899816  |
| H | -3.67905628 | 0.71352544  | 1.79762014  |

|   |             |             |             |
|---|-------------|-------------|-------------|
| H | 1.88508531  | 3.53082439  | 4.78287372  |
| H | 1.69082262  | 2.14234094  | 3.65969863  |
| H | 0.54654892  | 2.38578905  | 4.99192928  |
| H | 0.00332577  | 5.45145416  | 4.63765002  |
| H | -1.22792747 | 4.19039511  | 4.84196867  |
| H | -1.30267616 | 5.29875292  | 3.45312084  |
| H | -5.85220554 | -1.45600551 | 1.78122395  |
| H | -4.62744832 | -1.18805494 | 3.03573093  |
| H | -4.13190739 | -1.70901656 | 1.41480736  |
| H | -5.55749657 | 2.36628965  | 2.11105013  |
| H | -5.48796077 | 1.18572014  | 3.43778546  |
| H | -6.72073834 | 1.02953537  | 2.17096323  |
| H | -6.89081728 | -0.30140690 | 0.05023752  |
| H | -7.25140485 | -0.04499549 | -2.39115774 |
| H | -5.48954222 | 0.94668233  | -3.82747775 |
| H | 0.37435453  | 4.50096997  | -1.84325421 |
| H | -2.15535598 | 2.18561830  | -2.50012268 |
| H | 3.41448920  | 4.61246593  | -2.22281978 |
| H | 2.22846569  | 4.21562744  | -3.48601161 |
| H | 2.39969253  | 3.14979060  | -2.08138530 |
| H | 2.15006687  | 6.99037738  | -2.21092805 |
| H | 0.44329088  | 7.03788548  | -1.72601805 |
| H | 0.90773569  | 6.38039455  | -3.31214371 |
| H | -2.09847227 | -0.03900032 | -3.59057640 |
| H | -1.71049121 | 1.25299177  | -4.73752375 |
| H | -3.31453856 | 0.48946290  | -4.78157224 |
| H | -4.35207169 | 2.94089360  | -4.52267657 |
| H | -2.70287441 | 3.58800606  | -4.45998676 |
| H | -3.84805049 | 3.94179465  | -3.14684362 |
| H | -4.22458116 | -5.09333429 | -0.64445653 |
| H | -4.74001953 | -5.62418391 | 1.72377065  |
| H | -3.21018455 | -4.88832634 | 3.53601236  |
| H | -1.20783891 | -3.08041289 | -1.73074083 |
| H | 3.56514292  | -1.95581990 | 2.04282363  |
| H | -4.18948925 | -3.50400833 | -2.34063828 |
| H | -3.00203490 | -2.65101341 | -3.34812463 |
| H | -3.44917512 | -1.99378264 | -1.76168616 |
| H | -0.95142075 | -5.56182984 | -2.07052392 |
| H | -1.55433487 | -4.74763446 | -3.52916501 |
| H | -2.66786440 | -5.67945759 | -2.50512172 |
| H | 5.77814607  | 0.13829147  | 2.40602941  |
| H | 4.37464387  | -0.09287561 | 3.47684696  |
| H | 4.12313426  | 0.42214779  | 1.79804576  |
| H | 5.30541674  | -3.67916711 | 2.68811126  |
| H | 4.93168587  | -2.53595148 | 3.99822677  |
| H | 6.43667223  | -2.36824147 | 3.08222606  |
| H | 7.21389597  | -1.67717228 | 1.09246260  |
| H | 8.04201767  | -1.90043513 | -1.23716425 |
| H | 6.44308687  | -2.18134294 | -3.11402598 |
| H | 0.04155880  | -3.05600968 | 2.89627196  |
| H | 2.68699425  | -2.23660335 | -2.67662762 |
| H | -2.44834820 | -2.73885102 | 4.66175712  |



|    |             |             |             |
|----|-------------|-------------|-------------|
| H  | -1.75386567 | -1.51381109 | 3.56404887  |
| H  | -0.83893814 | -2.05451736 | 4.98594802  |
| H  | 0.30166178  | -4.34862538 | 4.98290194  |
| H  | 0.06256389  | -5.47480940 | 3.62881488  |
| H  | -1.26805688 | -5.13886493 | 4.75460272  |
| H  | 3.69233361  | -0.12560772 | -3.51479164 |
| H  | 3.14309385  | -1.16073990 | -4.84434517 |
| H  | 4.87770794  | -1.04772983 | -4.47322498 |
| H  | 3.75520757  | -4.47288354 | -3.11393378 |
| H  | 4.91221195  | -3.70495432 | -4.21768736 |
| H  | 3.18163716  | -3.70632410 | -4.61176441 |
| O  | 0.79017998  | 1.12511046  | 1.65456229  |
| O  | 0.83722976  | -0.23931204 | -2.83985565 |
| O  | 1.27980319  | 0.82624763  | -2.00036232 |
| O  | -0.31838761 | -1.60139153 | 0.91612334  |
| O  | 0.04505547  | 2.60718342  | -0.60811159 |
| Zr | 0.45433455  | 0.22011840  | 0.11408529  |

Peroxo Complex with adsorbed O<sub>2</sub> molecule (spiro conformation)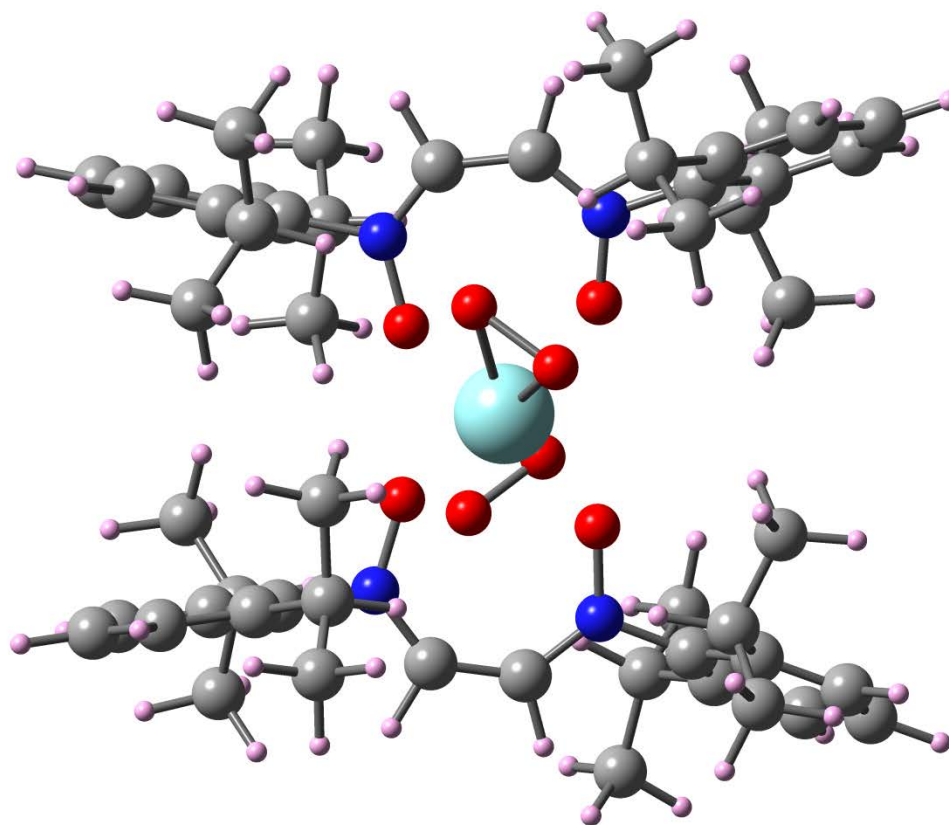Fig. S145: ONCCNO Peroxo Complex with adsorbed O<sub>2</sub> molecule (spiro conformation)

| SCF          | E <sub>ZP</sub> | H            | G            |
|--------------|-----------------|--------------|--------------|
| -2891.760878 | -2890.599647    | -2890.525481 | -2890.715226 |

|    |             |             |             |
|----|-------------|-------------|-------------|
| Zr | 0.18095740  | -0.02047016 | 0.12531261  |
| O  | 1.56739276  | 1.73786112  | -0.38340453 |
| O  | -1.30595132 | -1.42096943 | 0.74367617  |
| O  | -0.26487084 | 1.19190341  | 1.73375095  |
| O  | 0.89730073  | 0.22862071  | 2.04727645  |
| N  | 1.54311714  | -2.91865669 | -0.40182965 |
| N  | -1.69759566 | -2.66355990 | 0.29959538  |
| N  | -1.54386920 | 2.71467360  | -0.36801882 |
| N  | 1.66493718  | 2.87887737  | 0.31827666  |
| C  | 0.46832472  | -3.73780658 | -0.54451035 |
| C  | -0.89553498 | -3.62521896 | -0.23297337 |
| C  | -0.75028019 | 3.62401553  | 0.20406705  |
| C  | 0.63808975  | 3.69575712  | 0.54216007  |
| C  | 2.87852370  | -3.35445482 | -0.79005042 |
| C  | 3.21513127  | -3.43580256 | -2.16587616 |
| C  | 4.52426967  | -3.85625698 | -2.48814320 |

|   |             |             |             |
|---|-------------|-------------|-------------|
| C | 5.45784329  | -4.15799663 | -1.48631525 |
| C | 5.09817697  | -4.05496443 | -0.13261798 |
| C | 3.80045023  | -3.65820035 | 0.24797502  |
| C | 2.80262439  | -1.96437047 | -4.20334561 |
| C | 2.23887500  | -3.08730415 | -3.29517319 |
| C | 1.88338737  | -4.34533405 | -4.13244705 |
| C | -4.38220334 | -1.02307601 | -2.26931083 |
| C | -3.64955985 | -2.33307087 | -1.88131339 |
| C | -3.91484819 | -3.44500097 | -2.93047998 |
| C | -3.10138682 | -2.94683575 | 0.56999357  |
| C | -4.04480292 | -2.79259265 | -0.47460417 |
| C | -5.39564221 | -3.07244907 | -0.17316454 |
| C | -5.78121885 | -3.46346640 | 1.11818221  |
| C | -4.82370328 | -3.58296398 | 2.13968477  |
| C | -3.45964015 | -3.32883208 | 1.88894525  |
| C | 4.12188928  | -2.32935256 | 2.38144317  |
| C | 3.43489388  | -3.56038229 | 1.73257602  |
| C | 3.77866705  | -4.86177010 | 2.50150087  |
| C | -2.48414364 | -2.15189220 | 3.90806220  |
| C | -2.42516000 | -3.42108420 | 3.01448531  |
| C | -2.58095797 | -4.70838376 | 3.86133045  |
| C | -2.95708436 | 3.05812050  | -0.59882202 |
| C | -3.86920833 | 2.91046690  | 0.47245169  |
| C | -5.21387273 | 3.25215761  | 0.20784820  |
| C | -5.61496284 | 3.69015075  | -1.06330225 |
| C | -4.68170837 | 3.79319676  | -2.10855627 |
| C | -3.32360997 | 3.47682030  | -1.90161281 |
| C | -4.26401542 | 1.12355933  | 2.23531660  |
| C | -3.46261743 | 2.39588633  | 1.85791520  |
| C | -3.64091494 | 3.49865543  | 2.93530690  |
| C | 4.32893329  | 2.17413056  | -2.36522099 |
| C | 3.66933870  | 3.43315893  | -1.74113990 |
| C | 4.10217311  | 4.71952962  | -2.48998955 |
| C | 3.01611876  | 3.24048331  | 0.76690476  |
| C | 3.97969800  | 3.50764282  | -0.24174519 |
| C | 5.27716281  | 3.84848021  | 0.18893044  |
| C | 5.59105784  | 3.92252444  | 1.55564367  |
| C | 4.61399942  | 3.64497614  | 2.52191768  |
| C | 3.29825143  | 3.28386124  | 2.15656750  |
| C | -2.51632605 | 2.32908470  | -4.00681456 |
| C | -2.32102515 | 3.54311956  | -3.05786107 |
| C | -2.40281252 | 4.87982783  | -3.83636021 |
| C | 2.80274333  | 1.83688426  | 4.19224312  |
| C | 2.27736042  | 2.95166184  | 3.25247672  |
| C | 1.90691377  | 4.22347511  | 4.06306582  |
| H | 0.73459673  | -4.68373332 | -1.00350848 |
| H | -1.46501689 | -4.51616171 | -0.47721792 |
| H | -1.29627493 | 4.52165947  | 0.47434223  |
| H | 0.91390694  | 4.60474935  | 1.06362501  |
| H | 4.81551189  | -3.93200158 | -3.53258442 |
| H | 6.46362159  | -4.47047410 | -1.75806276 |
| H | 5.82959168  | -4.29190415 | 0.63536125  |

|   |             |             |             |
|---|-------------|-------------|-------------|
| H | 1.31319503  | -2.70047692 | -2.86210899 |
| H | -2.57774066 | -2.11276706 | -1.89439704 |
| H | 3.73365561  | -2.26907867 | -4.70012740 |
| H | 2.99558340  | -1.05709972 | -3.62058907 |
| H | 2.06937418  | -1.71180559 | -4.98004659 |
| H | 2.77122058  | -4.76098350 | -4.62755811 |
| H | 1.15301993  | -4.08688819 | -4.91036964 |
| H | 1.44865542  | -5.13773280 | -3.50806465 |
| H | -5.47132926 | -1.16144173 | -2.30158779 |
| H | -4.05433117 | -0.69127287 | -3.26297583 |
| H | -4.15839489 | -0.22225939 | -1.55484561 |
| H | -3.37529061 | -4.36829039 | -2.68156094 |
| H | -3.58262320 | -3.11494461 | -3.92331273 |
| H | -4.98389938 | -3.68872736 | -2.99521423 |
| H | -6.14801779 | -2.97471829 | -0.95170404 |
| H | -6.82765262 | -3.67031973 | 1.33136745  |
| H | -5.13860087 | -3.87878274 | 3.13660977  |
| H | 2.35662562  | -3.39620903 | 1.81869467  |
| H | -1.42600833 | -3.44038642 | 2.56514618  |
| H | 5.21653740  | -2.40463478 | 2.31777073  |
| H | 3.84430862  | -2.25686785 | 3.44136300  |
| H | 3.79958807  | -1.40981443 | 1.88258091  |
| H | 4.86027168  | -5.04926520 | 2.52832493  |
| H | 3.29590545  | -5.73700551 | 2.04695692  |
| H | 3.43253135  | -4.78175947 | 3.54048741  |
| H | -2.25928649 | -1.25912804 | 3.31631856  |
| H | -1.73913104 | -2.22247889 | 4.71147361  |
| H | -3.47627676 | -2.03977514 | 4.36792679  |
| H | -3.52249532 | -4.71598809 | 4.42614628  |
| H | -1.76250145 | -4.77416125 | 4.58998637  |
| H | -2.55454590 | -5.60974721 | 3.23491994  |
| H | -5.94999046 | 3.16247704  | 1.00186992  |
| H | -6.65701196 | 3.94365264  | -1.24338697 |
| H | -5.01035893 | 4.12096993  | -3.09072745 |
| H | -2.40674142 | 2.10496730  | 1.85153647  |
| H | 2.58923752  | 3.31846023  | -1.87764294 |
| H | -5.34194992 | 1.32393784  | 2.30220068  |
| H | -3.92682700 | 0.75149786  | 3.21029766  |
| H | -4.10415508 | 0.32541773  | 1.50156995  |
| H | -3.05578941 | 4.39747185  | 2.69724556  |
| H | -3.30384100 | 3.12499544  | 3.91022467  |
| H | -4.69261147 | 3.80044973  | 3.03286414  |
| H | 5.42219748  | 2.20751687  | -2.26328283 |
| H | 4.08712148  | 2.11104996  | -3.43429630 |
| H | 3.95983394  | 1.26651604  | -1.87663185 |
| H | 3.64360034  | 5.61562145  | -2.05130810 |
| H | 3.79433422  | 4.65779444  | -3.54203083 |
| H | 5.19103337  | 4.85638020  | -2.47403481 |
| H | 6.04504731  | 4.06119949  | -0.54943882 |
| H | 6.59845982  | 4.19002360  | 1.86573686  |
| H | 4.87486495  | 3.68964617  | 3.57533677  |
| H | -1.30621126 | 3.46152491  | -2.65142108 |

|   |             |             |             |
|---|-------------|-------------|-------------|
| H | 1.36850851  | 2.54770652  | 2.79942166  |
| H | -3.52286689 | 2.33081852  | -4.44697358 |
| H | -2.37087799 | 1.38983653  | -3.46353627 |
| H | -1.78471699 | 2.36787251  | -4.82430281 |
| H | -1.61626604 | 4.91363909  | -4.60124693 |
| H | -2.27149348 | 5.74380490  | -3.17175277 |
| H | -3.36536692 | 4.99362709  | -4.35123607 |
| H | 2.99400131  | 0.92257044  | 3.62254140  |
| H | 2.03547622  | 1.60084708  | 4.94007029  |
| H | 3.71754888  | 2.13497301  | 4.72291124  |
| H | 1.50128745  | 5.01938439  | 3.42183575  |
| H | 2.78048151  | 4.63519019  | 4.58658623  |
| H | 1.14758116  | 3.97672892  | 4.81611236  |
| O | -0.30968110 | -1.02252060 | -1.92031480 |
| O | 0.76435093  | -0.15653689 | -2.08291067 |
| O | 1.51188410  | -1.72594132 | 0.28292091  |
| O | -1.20819863 | 1.49145640  | -0.82209576 |

Peroxo Complex with adsorbed O<sub>2</sub> molecule (planar conformation)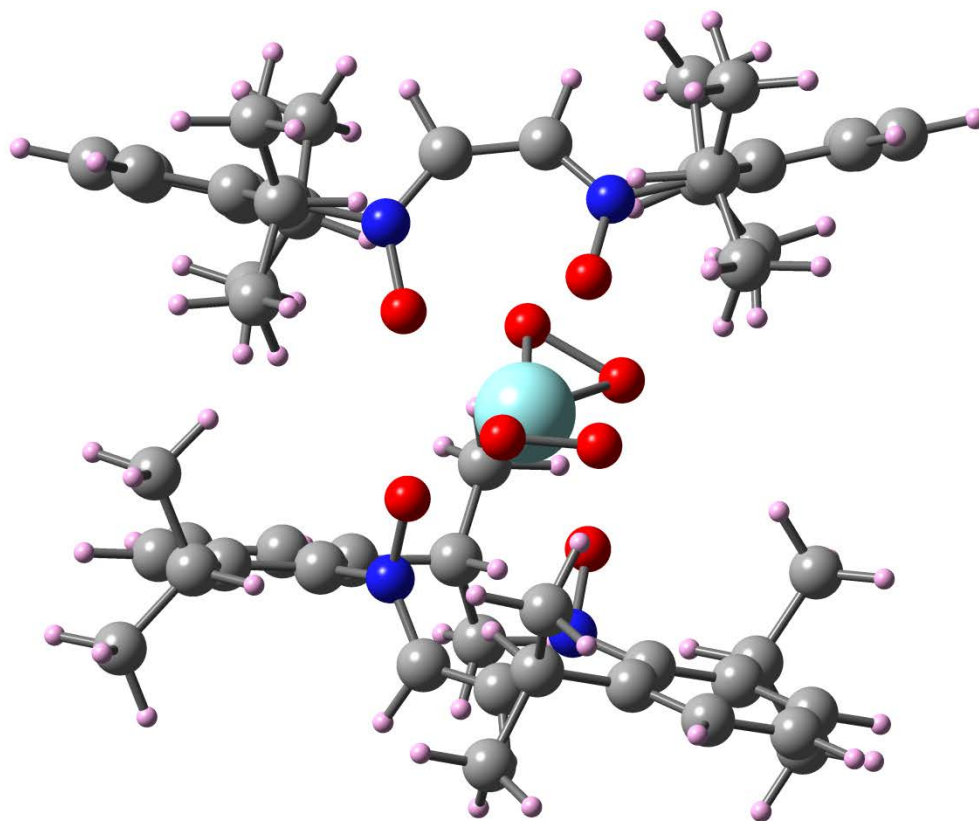Fig. S146: ONCCNO Peroxo Complex with adsorbed O<sub>2</sub> molecule (planar conformation)

| SCF          | E <sub>ZP</sub> | H            | G            |
|--------------|-----------------|--------------|--------------|
| -2891.754894 | -2890.593548    | -2890.519499 | -2890.709371 |

|    |             |             |             |
|----|-------------|-------------|-------------|
| Zr | -0.43080200 | -0.02085363 | -0.06687941 |
| O  | -1.15361940 | 0.55508815  | 1.78027192  |
| O  | 0.33560103  | 0.96580494  | 1.56329187  |
| O  | -0.88093584 | -0.15051861 | -2.28869911 |
| O  | -2.11934740 | 0.03052761  | -1.66906982 |
| C  | -2.06226170 | 3.88531344  | 0.70833132  |
| C  | -3.02475368 | 4.35122000  | -0.22990383 |
| C  | -4.19217326 | 4.94119946  | 0.29324332  |
| C  | -4.38477992 | 5.06950666  | 1.67724078  |
| C  | -3.40990786 | 4.60592093  | 2.57121857  |
| C  | -2.22274498 | 3.99180016  | 2.11698331  |
| C  | -3.80885209 | 3.19599394  | -2.34718177 |
| C  | -2.85072627 | 4.26208606  | -1.75146443 |
| C  | -3.05374947 | 5.64008103  | -2.43403712 |
| C  | 2.60936501  | 1.06340724  | -4.21891906 |
| C  | 2.80339288  | 2.40076116  | -3.45312734 |

|   |             |             |             |
|---|-------------|-------------|-------------|
| C | 3.15106256  | 3.55630330  | -4.42429307 |
| C | 3.51053173  | 2.08442554  | -0.98455204 |
| C | 3.85283023  | 2.22845894  | -2.35065988 |
| C | 5.22523271  | 2.16397106  | -2.66792456 |
| C | 6.19105424  | 1.96583056  | -1.66745763 |
| C | 5.80636064  | 1.81077944  | -0.32696535 |
| C | 4.44669904  | 1.85247645  | 0.05064749  |
| C | -1.87368310 | 2.55759313  | 4.19984103  |
| C | -1.20888853 | 3.48564310  | 3.15224997  |
| C | -0.50423605 | 4.68129095  | 3.85145828  |
| C | 4.64187279  | 0.33907115  | 2.09118446  |
| C | 4.04531350  | 1.64793754  | 1.51677560  |
| C | 4.46831688  | 2.86537564  | 2.38298751  |
| C | 2.34319569  | -3.12107467 | 1.04526360  |
| C | 2.35619213  | -3.09014708 | 2.46343939  |
| C | 3.59123099  | -3.32716786 | 3.10526442  |
| C | 4.75780943  | -3.56808420 | 2.36312153  |
| C | 4.71793760  | -3.57007430 | 0.95852287  |
| C | 3.50893321  | -3.34649551 | 0.26805875  |
| C | 1.25199030  | -1.44864185 | 4.06123732  |
| C | 1.10377730  | -2.78922713 | 3.29305353  |
| C | 0.77136710  | -3.95531303 | 4.25971519  |
| C | -2.74547746 | -2.08872248 | -4.33538391 |
| C | -2.47640019 | -3.11470788 | -3.20565184 |
| C | -2.29178248 | -4.53936690 | -3.79606304 |
| C | -3.33137956 | -2.96907275 | -0.75350649 |
| C | -3.58426132 | -3.10048890 | -2.14551120 |
| C | -4.92985058 | -3.22430011 | -2.55290213 |
| C | -5.97777364 | -3.18816394 | -1.62196536 |
| C | -5.69878859 | -3.04364407 | -0.25364410 |
| C | -4.37341902 | -2.94317902 | 0.21479641  |
| C | 4.20406350  | -2.07675622 | -1.81065683 |
| C | 3.47976806  | -3.33448331 | -1.26250134 |
| C | 4.07907761  | -4.63076486 | -1.86502754 |
| C | -4.50766882 | -1.40846634 | 2.22832642  |
| C | -4.10984815 | -2.81953521 | 1.71969943  |
| C | -4.83211968 | -3.92837597 | 2.52747069  |
| H | -4.95277239 | 5.30753049  | -0.38988038 |
| H | -5.29489548 | 5.52701300  | 2.05777805  |
| H | -3.57747072 | 4.70053946  | 3.63993225  |
| H | -1.83389970 | 3.92862780  | -1.97897233 |
| H | 1.83817632  | 2.63935706  | -2.99162689 |
| H | -4.85823942 | 3.44497717  | -2.13744063 |
| H | -3.59066087 | 2.20618499  | -1.93465177 |
| H | -3.68290218 | 3.14464793  | -3.43688384 |
| H | -4.08527836 | 6.00103198  | -2.33235717 |
| H | -2.84057351 | 5.55467770  | -3.50766768 |
| H | -2.38640855 | 6.40344255  | -2.01203003 |
| H | 3.54270908  | 0.75018014  | -4.70656891 |
| H | 1.83966746  | 1.18044866  | -4.99233280 |
| H | 2.28572248  | 0.27259380  | -3.53473482 |
| H | 3.30487241  | 4.50268850  | -3.88936352 |

|   |             |             |             |
|---|-------------|-------------|-------------|
| H | 2.33152743  | 3.69777592  | -5.14048132 |
| H | 4.05866364  | 3.34432100  | -5.00395557 |
| H | 5.53942760  | 2.26995691  | -3.70236193 |
| H | 7.24419539  | 1.92404145  | -1.93500659 |
| H | 6.56449484  | 1.64109689  | 0.43228034  |
| H | -0.45622076 | 2.86787217  | 2.65586583  |
| H | 2.95616159  | 1.54873618  | 1.58461978  |
| H | -2.64575937 | 3.07259557  | 4.78771446  |
| H | -1.10889246 | 2.19146194  | 4.89729922  |
| H | -2.30807047 | 1.68736232  | 3.70000834  |
| H | -1.22255145 | 5.29412659  | 4.41252728  |
| H | 0.00240122  | 5.34581667  | 3.13612545  |
| H | 0.24807596  | 4.31096334  | 4.56002542  |
| H | 4.35284344  | -0.52725791 | 1.48731316  |
| H | 4.26769684  | 0.17767711  | 3.10952267  |
| H | 5.73850953  | 0.37567133  | 2.13847616  |
| H | 5.55840527  | 2.99769612  | 2.37512338  |
| H | 4.15243949  | 2.71480722  | 3.42299137  |
| H | 4.01726271  | 3.80101587  | 2.02516295  |
| H | 3.63861960  | -3.31601254 | 4.19124461  |
| H | 5.69918029  | -3.74812288 | 2.87771120  |
| H | 5.63050636  | -3.75086855 | 0.39614008  |
| H | 0.25302251  | -2.66881538 | 2.61506186  |
| H | -1.53499430 | -2.81925956 | -2.73221781 |
| H | 2.11880447  | -1.46709992 | 4.73712348  |
| H | 0.35282632  | -1.26598421 | 4.66375892  |
| H | 1.35249660  | -0.60891702 | 3.36439773  |
| H | 0.63818405  | -4.90108614 | 3.71781111  |
| H | -0.15851117 | -3.73859214 | 4.80138251  |
| H | 1.56461043  | -4.10348678 | 5.00499719  |
| H | -3.63991255 | -2.34775175 | -4.91828691 |
| H | -1.89187529 | -2.06608275 | -5.02549322 |
| H | -2.87189762 | -1.08463778 | -3.91974791 |
| H | -2.04391222 | -5.27408025 | -3.01851015 |
| H | -1.48092957 | -4.54113694 | -4.53675056 |
| H | -3.20815207 | -4.88003390 | -4.29660536 |
| H | -5.15774403 | -3.32794551 | -3.61028096 |
| H | -7.00816567 | -3.27023310 | -1.96069381 |
| H | -6.51802128 | -3.02068486 | 0.46005431  |
| H | 2.43632849  | -3.26431688 | -1.58718932 |
| H | -3.03538690 | -2.92088970 | 1.89570155  |
| H | 5.26224264  | -2.06499761 | -1.51531745 |
| H | 3.72670439  | -1.16514937 | -1.43564333 |
| H | 4.15799585  | -2.06111472 | -2.90793447 |
| H | 3.98438202  | -4.61590366 | -2.95888665 |
| H | 3.56247994  | -5.52405638 | -1.49015333 |
| H | 5.14580264  | -4.73505899 | -1.62625148 |
| H | -3.91372900 | -0.64168808 | 1.72123477  |
| H | -4.31741107 | -1.32696217 | 3.30703346  |
| H | -5.57389016 | -1.20744153 | 2.05245596  |
| H | -4.56073921 | -4.92975514 | 2.16743993  |
| H | -5.92466446 | -3.83472937 | 2.47050537  |



|   |             |             |             |
|---|-------------|-------------|-------------|
| H | -4.55119559 | -3.85837375 | 3.58688353  |
| O | -1.65074228 | -1.73977057 | 0.48371270  |
| N | -1.96037534 | -2.86026343 | -0.28845237 |
| O | 0.92984273  | -1.65318106 | -0.21425792 |
| O | -1.06152548 | 2.19067407  | -0.64361220 |
| O | 1.41209379  | 1.03304198  | -0.95682541 |
| N | 1.08120000  | -2.90948681 | 0.36265048  |
| N | 2.07734998  | 2.14250895  | -0.63018114 |
| N | -0.86163294 | 3.24295392  | 0.16044296  |
| C | 1.62749182  | 3.26384174  | -0.06091005 |
| H | 2.42518962  | 3.97934439  | 0.10538187  |
| C | 0.35031490  | 3.72768015  | 0.38943089  |
| H | 0.37583488  | 4.64580634  | 0.96305371  |
| C | -1.10797226 | -3.92082733 | -0.28908974 |
| H | -1.54883047 | -4.86076648 | -0.60231473 |
| C | 0.22441027  | -3.94426189 | 0.12549002  |
| H | 0.66488483  | -4.92172409 | 0.29740048  |

Peroxo Complex with adsorbed O<sub>2</sub> molecule (butterfly conformation)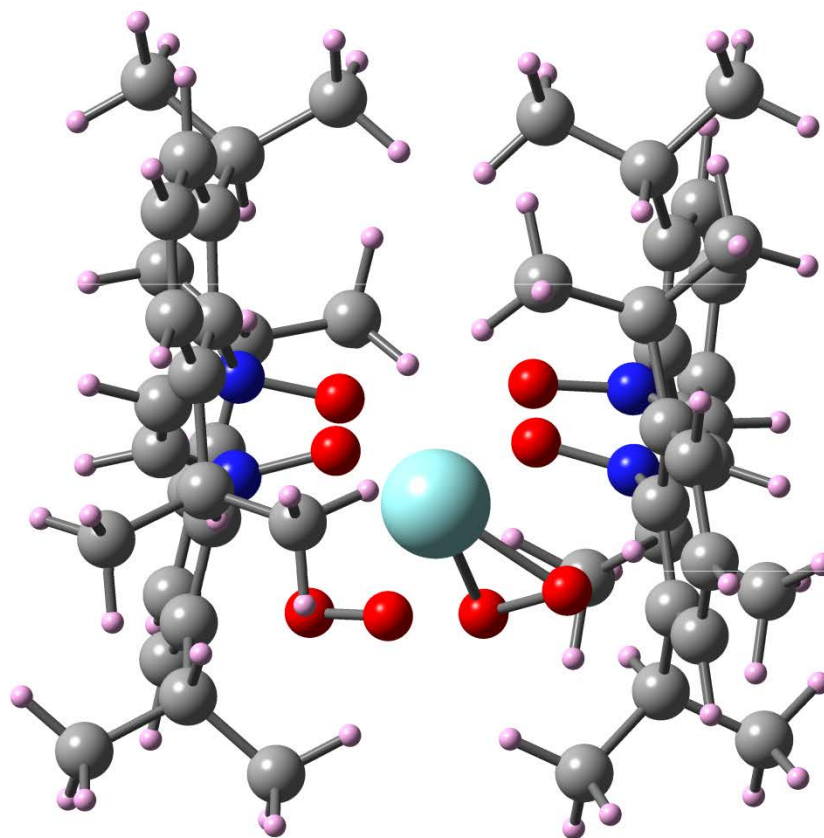Fig. S147: ONCCNO Peroxo Complex with adsorbed O<sub>2</sub> molecule (butterfly conformation)

| SCF          | E <sub>ZP</sub> | H            | G            |
|--------------|-----------------|--------------|--------------|
| -2891.763670 | -2890.602933    | -2890.528493 | -2890.720636 |

|   |             |             |             |
|---|-------------|-------------|-------------|
| O | 0.52919000  | -1.47557100 | 0.80872500  |
| O | 1.92946100  | 0.79437800  | -0.09899100 |
| O | 1.15047900  | -1.04869500 | -2.21958100 |
| N | -0.38209900 | 2.90977600  | 0.71534000  |
| N | 2.53496000  | 1.98854800  | -0.45459900 |
| N | -2.53067100 | -1.90819100 | -0.43899800 |
| N | 0.36938400  | -2.81085300 | 0.78155700  |
| C | 0.76197500  | 3.57588900  | 0.38737100  |
| C | 1.99923500  | 3.19769800  | -0.15289400 |
| C | -1.93886000 | -3.08669700 | -0.26638600 |
| C | -0.67860300 | -3.47470000 | 0.29738300  |
| C | -1.46355500 | 3.61300700  | 1.39626400  |
| C | -2.50954700 | 4.16875200  | 0.61922200  |
| C | -3.54735900 | 4.83212400  | 1.30817600  |
| C | -3.54241900 | 4.92582900  | 2.70914300  |
| C | -2.50101200 | 4.34808000  | 3.45320100  |

|   |             |             |             |
|---|-------------|-------------|-------------|
| C | -1.44060200 | 3.67395300  | 2.81197400  |
| C | -3.72955600 | 3.12582400  | -1.33954500 |
| C | -2.55453000 | 4.04156400  | -0.90513600 |
| C | -2.63961900 | 5.42555800  | -1.59814000 |
| C | 2.88083000  | 1.22109800  | -4.34265600 |
| C | 3.08594100  | 2.39707200  | -3.34988900 |
| C | 3.40244200  | 3.71532000  | -4.10251500 |
| C | 3.89863000  | 1.85583000  | -0.94744700 |
| C | 4.17049900  | 2.05728900  | -2.32403300 |
| C | 5.50759000  | 1.89704300  | -2.75006900 |
| C | 6.51990300  | 1.53872000  | -1.84815400 |
| C | 6.21715400  | 1.33218400  | -0.49185900 |
| C | 4.90146300  | 1.48648300  | -0.01186400 |
| C | -0.92041000 | 1.77765900  | 4.40676400  |
| C | -0.34444100 | 2.99728400  | 3.63889000  |
| C | 0.35555900  | 3.98318500  | 4.60732300  |
| C | 4.67029200  | -0.27863800 | 1.78752100  |
| C | 4.58853700  | 1.23742200  | 1.46654400  |
| C | 5.51076200  | 2.05812400  | 2.40358000  |
| C | -3.91760200 | -1.84352500 | -0.93535300 |
| C | -4.16754600 | -1.97475600 | -2.32337900 |
| C | -5.51857900 | -1.90471600 | -2.72899500 |
| C | -6.54882800 | -1.69117200 | -1.80137400 |
| C | -6.25496100 | -1.53530200 | -0.43652300 |
| C | -4.92748500 | -1.60547900 | 0.03132000  |
| C | -3.13546900 | -1.10626200 | -4.48496500 |
| C | -3.05997500 | -2.17268400 | -3.36227300 |
| C | -3.10944600 | -3.60428800 | -3.95843400 |
| C | 1.14015100  | -1.77064800 | 4.36494700  |
| C | 0.51745400  | -3.02140400 | 3.69049100  |
| C | -0.05324300 | -4.00093000 | 4.74545900  |
| C | 1.49152000  | -3.57108900 | 1.36005200  |
| C | 1.54482500  | -3.68744600 | 2.77040400  |
| C | 2.62321700  | -4.41718500 | 3.31052500  |
| C | 3.59510400  | -4.99147600 | 2.47456600  |
| C | 3.51596100  | -4.83738400 | 1.08211400  |
| C | 2.46273100  | -4.11111300 | 0.48376100  |
| C | -4.77192300 | 0.11950600  | 1.87534300  |
| C | -4.61859400 | -1.38327500 | 1.51604900  |
| C | -5.49248400 | -2.27196200 | 2.43654000  |
| C | 3.71142800  | -3.28102700 | -1.57256500 |
| C | 2.41295400  | -3.93553300 | -1.03741200 |
| C | 2.15062100  | -5.29455100 | -1.74070900 |
| H | 0.67563400  | 4.63811300  | 0.59215800  |
| H | 2.67081000  | 4.02271300  | -0.36600100 |
| H | -2.54991000 | -3.92312700 | -0.58598100 |
| H | -0.55329900 | -4.54999600 | 0.36030800  |
| H | -4.36459300 | 5.27304500  | 0.74328200  |
| H | -4.35158300 | 5.44218200  | 3.22082200  |
| H | -2.51426700 | 4.41653900  | 4.53821500  |
| H | -1.63449400 | 3.55834700  | -1.24643200 |
| H | 2.13386300  | 2.53594700  | -2.83192700 |

|   |             |             |             |
|---|-------------|-------------|-------------|
| H | -4.69915900 | 3.55361800  | -1.04838500 |
| H | -3.63373000 | 2.13325000  | -0.88516700 |
| H | -3.72142600 | 2.99771500  | -2.42884800 |
| H | -3.56920300 | 5.95271400  | -1.34416600 |
| H | -2.61535600 | 5.29806100  | -2.68808500 |
| H | -1.79820800 | 6.07062200  | -1.31226600 |
| H | 3.80163900  | 1.00324200  | -4.90179000 |
| H | 2.09496700  | 1.47886600  | -5.06471500 |
| H | 2.56308800  | 0.31367900  | -3.81668800 |
| H | 3.52849900  | 4.55738900  | -3.40829800 |
| H | 2.58072500  | 3.95890000  | -4.78831100 |
| H | 4.32106300  | 3.63195500  | -4.69855400 |
| H | 5.75051900  | 2.04262800  | -3.79937700 |
| H | 7.54153200  | 1.41540600  | -2.20062800 |
| H | 7.00872200  | 1.05051800  | 0.19799900  |
| H | 0.41728100  | 2.61024700  | 2.95389000  |
| H | 3.55595200  | 1.54469600  | 1.65951600  |
| H | -1.68037600 | 2.08948400  | 5.13627000  |
| H | -0.11402600 | 1.26486300  | 4.94733100  |
| H | -1.37794500 | 1.06418700  | 3.71181300  |
| H | -0.34213600 | 4.38415700  | 5.35439400  |
| H | 0.79169000  | 4.83222000  | 4.06552000  |
| H | 1.16289400  | 3.47246800  | 5.14897200  |
| H | 3.95441500  | -0.83467600 | 1.17330000  |
| H | 4.42980700  | -0.45833700 | 2.84438500  |
| H | 5.67849800  | -0.67114400 | 1.59671100  |
| H | 6.56128100  | 1.75289000  | 2.31105500  |
| H | 5.21394900  | 1.90630200  | 3.45011900  |
| H | 5.45234800  | 3.13218200  | 2.18379400  |
| H | -5.75842500 | -2.00424100 | -3.78385400 |
| H | -7.58003800 | -1.63544300 | -2.14213700 |
| H | -7.06116800 | -1.35493500 | 0.26903200  |
| H | -2.08636400 | -2.03565500 | -2.88225800 |
| H | -0.32374800 | -2.66586400 | 3.08394700  |
| H | -4.06567500 | -1.17756400 | -5.06550200 |
| H | -2.29461500 | -1.24656800 | -5.17565600 |
| H | -3.05558700 | -0.09591100 | -4.06822400 |
| H | -3.02195800 | -4.37477800 | -3.17973200 |
| H | -2.27874700 | -3.74249700 | -4.66147600 |
| H | -4.04905100 | -3.78184100 | -4.49999900 |
| H | 2.01381800  | -2.04478300 | 4.97151300  |
| H | 0.40607400  | -1.29149400 | 5.02556200  |
| H | 1.45471200  | -1.04430100 | 3.60751300  |
| H | -0.49797700 | -4.88685000 | 4.27368400  |
| H | -0.83058200 | -3.50080100 | 5.33787700  |
| H | 0.72029200  | -4.34523300 | 5.44351000  |
| H | 2.70493400  | -4.53469500 | 4.38757700  |
| H | 4.41908500  | -5.55187700 | 2.90999300  |
| H | 4.28406300  | -5.27312500 | 0.44924500  |
| H | -3.57114300 | -1.64575900 | 1.70365900  |
| H | 1.60004800  | -3.25552800 | -1.30675000 |
| H | -5.80316800 | 0.46050800  | 1.71218000  |

|    |             |             |             |
|----|-------------|-------------|-------------|
| H  | -4.10004300 | 0.73340300  | 1.26628000  |
| H  | -4.52193500 | 0.28324000  | 2.93188800  |
| H  | -5.19543200 | -2.13011400 | 3.48393100  |
| H  | -5.38474100 | -3.33661500 | 2.19079200  |
| H  | -6.55680900 | -2.01554900 | 2.36040700  |
| H  | 3.88857200  | -2.31482500 | -1.08747700 |
| H  | 3.60536400  | -3.09328000 | -2.64729900 |
| H  | 4.59223400  | -3.92020000 | -1.41872500 |
| H  | 1.20888200  | -5.75186800 | -1.40656100 |
| H  | 2.95907100  | -6.01245300 | -1.54489500 |
| H  | 2.08405600  | -5.14302500 | -2.82512200 |
| O  | 0.01701200  | 1.72372400  | -2.34312900 |
| O  | -1.18678100 | 1.02644900  | -2.40942600 |
| O  | -0.18394100 | -1.76972400 | -1.94330700 |
| O  | -1.99940600 | -0.71857300 | -0.09123600 |
| O  | -0.66265700 | 1.58874300  | 0.46614300  |
| Zr | 0.03844800  | 0.00130800  | -0.84495000 |

## 10.6 Structures with nine oxygen atoms

### Peroxo Complex with adsorbed ozone group

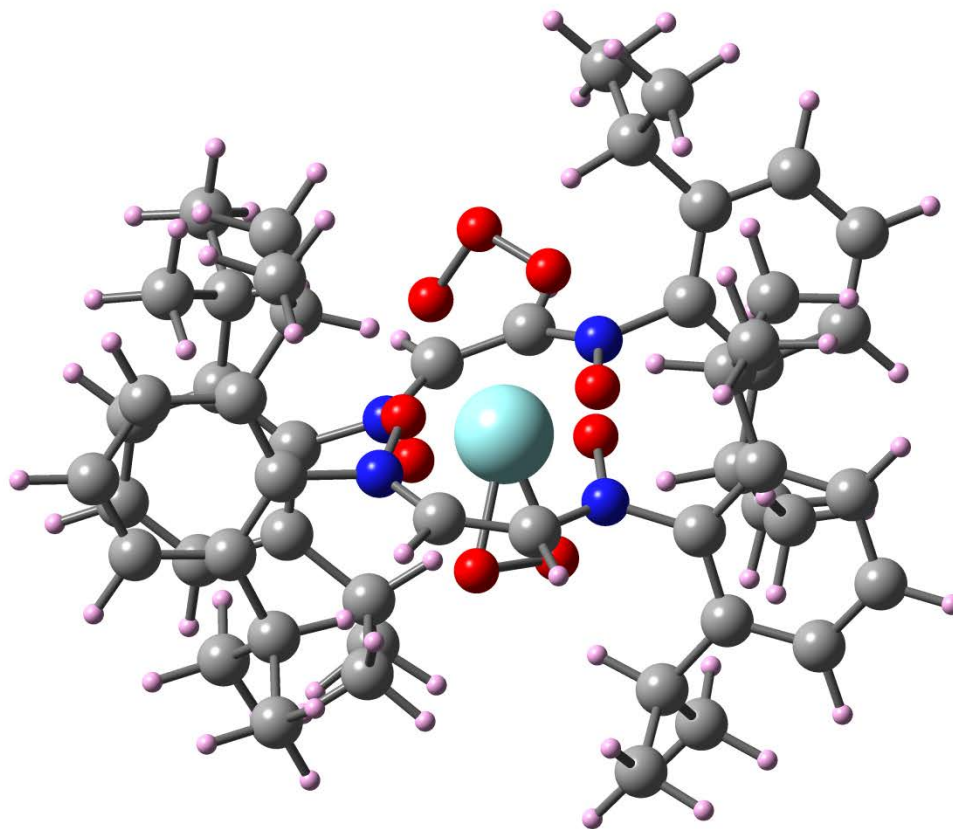

Fig. S148: ONCCNO Peroxo Complex with adsorbed ozone group

| SCF          | E <sub>ZP</sub> | H            | G            |
|--------------|-----------------|--------------|--------------|
| -2966.900838 | -2965.736557    | -2965.660953 | -2965.854763 |

|   |             |             |             |
|---|-------------|-------------|-------------|
| O | 1.64944193  | 1.49558299  | 0.04293108  |
| O | -1.31841622 | -1.44615294 | 0.91784001  |
| O | -0.61657569 | 1.21449163  | 1.79152053  |
| N | 1.39093133  | -3.08485892 | -0.25663906 |
| N | -1.81095920 | -2.66887387 | 0.49227769  |
| N | -1.40377177 | 2.83019131  | -0.44463291 |
| N | 1.79755383  | 2.78143241  | 0.35067517  |
| C | 0.28899083  | -3.87974566 | -0.30989141 |
| C | -1.06051363 | -3.70298661 | 0.01989186  |
| C | -0.54116978 | 3.74094965  | 0.01814484  |
| C | 0.84704211  | 3.72139406  | 0.34775827  |
| C | 2.68406845  | -3.54288025 | -0.73652934 |
| C | 2.92206930  | -3.59583721 | -2.13395761 |
| C | 4.18965879  | -4.05502917 | -2.55497309 |

|   |             |             |             |
|---|-------------|-------------|-------------|
| C | 5.17817263  | -4.41323058 | -1.62619762 |
| C | 4.91975777  | -4.32524077 | -0.24817423 |
| C | 3.66537612  | -3.89330895 | 0.22788628  |
| C | 2.42712641  | -2.08473387 | -4.12417482 |
| C | 1.87721234  | -3.18020549 | -3.17587199 |
| C | 1.38378589  | -4.41075970 | -3.98333606 |
| C | -4.33518205 | -1.24723324 | -2.45970862 |
| C | -3.61368899 | -2.46536345 | -1.82925147 |
| C | -3.77369258 | -3.72023585 | -2.72839763 |
| C | -3.24105059 | -2.82707492 | 0.70635103  |
| C | -4.11415520 | -2.74115352 | -0.40724253 |
| C | -5.49376373 | -2.91644832 | -0.16200254 |
| C | -5.97653663 | -3.13465620 | 1.13750261  |
| C | -5.08831382 | -3.18158770 | 2.22508491  |
| C | -3.69970504 | -3.03077029 | 2.03380543  |
| C | 4.19167984  | -2.61020973 | 2.34721706  |
| C | 3.40306291  | -3.79759449 | 1.73362074  |
| C | 3.73102897  | -5.12357093 | 2.46620543  |
| C | -2.85921383 | -1.72081551 | 4.02648841  |
| C | -2.74367087 | -3.04844976 | 3.22934039  |
| C | -2.96986787 | -4.27443078 | 4.14906012  |
| C | -2.76662493 | 3.26139772  | -0.81169861 |
| C | -3.74057927 | 3.37283517  | 0.20715403  |
| C | -5.03126222 | 3.77977068  | -0.19681908 |
| C | -5.32258876 | 4.03145150  | -1.54587965 |
| C | -4.33204728 | 3.87729620  | -2.53049311 |
| C | -3.02230094 | 3.48392583  | -2.18786722 |
| C | -4.38089700 | 1.91542366  | 2.18686044  |
| C | -3.45761585 | 3.05346318  | 1.67882665  |
| C | -3.59990430 | 4.31926761  | 2.56468803  |
| C | 4.20006770  | 1.59502930  | -2.38451182 |
| C | 3.61839112  | 2.95937364  | -1.92488393 |
| C | 3.99836096  | 4.09171778  | -2.91215869 |
| C | 3.19408174  | 3.17342707  | 0.62332010  |
| C | 4.06391145  | 3.26775101  | -0.49184903 |
| C | 5.40000527  | 3.62982219  | -0.22481598 |
| C | 5.83496156  | 3.87826549  | 1.08725614  |
| C | 4.94578147  | 3.75648940  | 2.16525944  |
| C | 3.59810509  | 3.38776443  | 1.96207362  |
| C | -2.16536165 | 1.87700580  | -3.94800256 |
| C | -1.96116006 | 3.26098914  | -3.27068103 |
| C | -1.93595725 | 4.40001656  | -4.31983005 |
| C | 3.19401229  | 2.12307383  | 4.12918885  |
| C | 2.66537036  | 3.21778406  | 3.16598461  |
| C | 2.46006007  | 4.56268913  | 3.91241888  |
| H | 0.51686934  | -4.85852486 | -0.71857043 |
| H | -1.67058641 | -4.58099475 | -0.16536438 |
| H | -0.99442059 | 4.71962917  | 0.12632091  |
| H | 1.23364757  | 4.69441873  | 0.62959173  |
| H | 4.40582233  | -4.11611692 | -3.61837930 |
| H | 6.15028569  | -4.75568819 | -1.97432977 |
| H | 5.69555293  | -4.59959529 | 0.46200209  |

|   |             |             |             |
|---|-------------|-------------|-------------|
| H | 1.01748403  | -2.73680951 | -2.66570483 |
| H | -2.55002242 | -2.21078381 | -1.79133122 |
| H | 3.30240225  | -2.42997497 | -4.69209020 |
| H | 2.69793063  | -1.19096698 | -3.55281180 |
| H | 1.64789413  | -1.79387599 | -4.84016187 |
| H | 2.20330578  | -4.87250527 | -4.55125434 |
| H | 0.60732308  | -4.10540821 | -4.69696804 |
| H | 0.95682504  | -5.18139757 | -3.32716904 |
| H | -5.40972721 | -1.43093532 | -2.59622709 |
| H | -3.90169867 | -1.03086472 | -3.44430727 |
| H | -4.21373302 | -0.35424339 | -1.83550430 |
| H | -3.22602300 | -4.58014198 | -2.32068085 |
| H | -3.38250941 | -3.51651073 | -3.73365515 |
| H | -4.82894933 | -4.01025275 | -2.82569771 |
| H | -6.19355439 | -2.86760108 | -0.99219735 |
| H | -7.04403034 | -3.26086165 | 1.30463979  |
| H | -5.47607318 | -3.34012919 | 3.22802269  |
| H | 2.34132949  | -3.58252089 | 1.88934024  |
| H | -1.71696824 | -3.09991319 | 2.85211512  |
| H | 5.27505915  | -2.74445580 | 2.22072683  |
| H | 3.97891009  | -2.52883496 | 3.42139125  |
| H | 3.89456969  | -1.67077219 | 1.86954166  |
| H | 4.80032017  | -5.36721142 | 2.41095691  |
| H | 3.17112558  | -5.96633277 | 2.03993207  |
| H | 3.46552237  | -5.03943278 | 3.52841103  |
| H | -2.62081986 | -0.86888200 | 3.38117116  |
| H | -2.15340424 | -1.72088647 | 4.86782719  |
| H | -3.87317018 | -1.58879647 | 4.42987515  |
| H | -3.95696889 | -4.24941218 | 4.62939762  |
| H | -2.21581697 | -4.28620456 | 4.94708780  |
| H | -2.89014300 | -5.21606441 | 3.59015797  |
| H | -5.81349374 | 3.88451263  | 0.54991991  |
| H | -6.32549553 | 4.33793792  | -1.83357878 |
| H | -4.57844842 | 4.06128931  | -3.57204603 |
| H | -2.43321893 | 2.68184596  | 1.78123349  |
| H | 2.52825176  | 2.85466860  | -1.94869634 |
| H | -5.44049670 | 2.20262737  | 2.15378409  |
| H | -4.12879237 | 1.67017849  | 3.22624621  |
| H | -4.24976220 | 1.00764616  | 1.58732283  |
| H | -2.92364535 | 5.12131623  | 2.23822713  |
| H | -3.35905275 | 4.07610474  | 3.60744197  |
| H | -4.62365362 | 4.71582359  | 2.53926519  |
| H | 5.29847336  | 1.61201195  | -2.38305379 |
| H | 3.86019324  | 1.36626080  | -3.40230022 |
| H | 3.85972694  | 0.78913949  | -1.72640435 |
| H | 3.59225413  | 5.06075617  | -2.59289053 |
| H | 3.59775635  | 3.86383980  | -3.90820734 |
| H | 5.08603831  | 4.19837584  | -3.01241215 |
| H | 6.10326104  | 3.71440239  | -1.04833440 |
| H | 6.86993902  | 4.15729411  | 1.26957403  |
| H | 5.30126207  | 3.93352772  | 3.17654583  |
| H | -0.97180316 | 3.23185830  | -2.79791251 |



|    |             |             |             |
|----|-------------|-------------|-------------|
| H  | 1.68478907  | 2.87848513  | 2.81802452  |
| H  | -3.16418958 | 1.80758751  | -4.40093825 |
| H  | -2.04197828 | 1.06648218  | -3.22327747 |
| H  | -1.41773343 | 1.73505796  | -4.73897248 |
| H  | -1.09677569 | 4.24684400  | -5.01034390 |
| H  | -1.81778136 | 5.38514042  | -3.84916848 |
| H  | -2.85277643 | 4.42085683  | -4.92292919 |
| H  | 3.28002039  | 1.15947310  | 3.61569918  |
| H  | 2.49445757  | 1.99400342  | 4.96454768  |
| H  | 4.17484054  | 2.38921296  | 4.54479520  |
| H  | 2.05519154  | 5.33917735  | 3.24895707  |
| H  | 3.40454959  | 4.93853802  | 4.32682273  |
| H  | 1.75851973  | 4.42658272  | 4.74518978  |
| O  | -0.51550691 | -1.02802153 | -1.68982043 |
| O  | 0.69527493  | -0.12079176 | -1.94980616 |
| O  | 0.19169136  | 0.77148871  | 2.89585564  |
| O  | 1.08043534  | -0.18935912 | 2.43555678  |
| O  | -1.16096844 | 1.55266885  | -0.70730966 |
| O  | 1.41306415  | -1.84734210 | 0.36286811  |
| Zr | 0.15375764  | -0.17759212 | 0.04924453  |

$\eta^2$ -ozone Complex with adsorbed O<sub>2</sub> molecule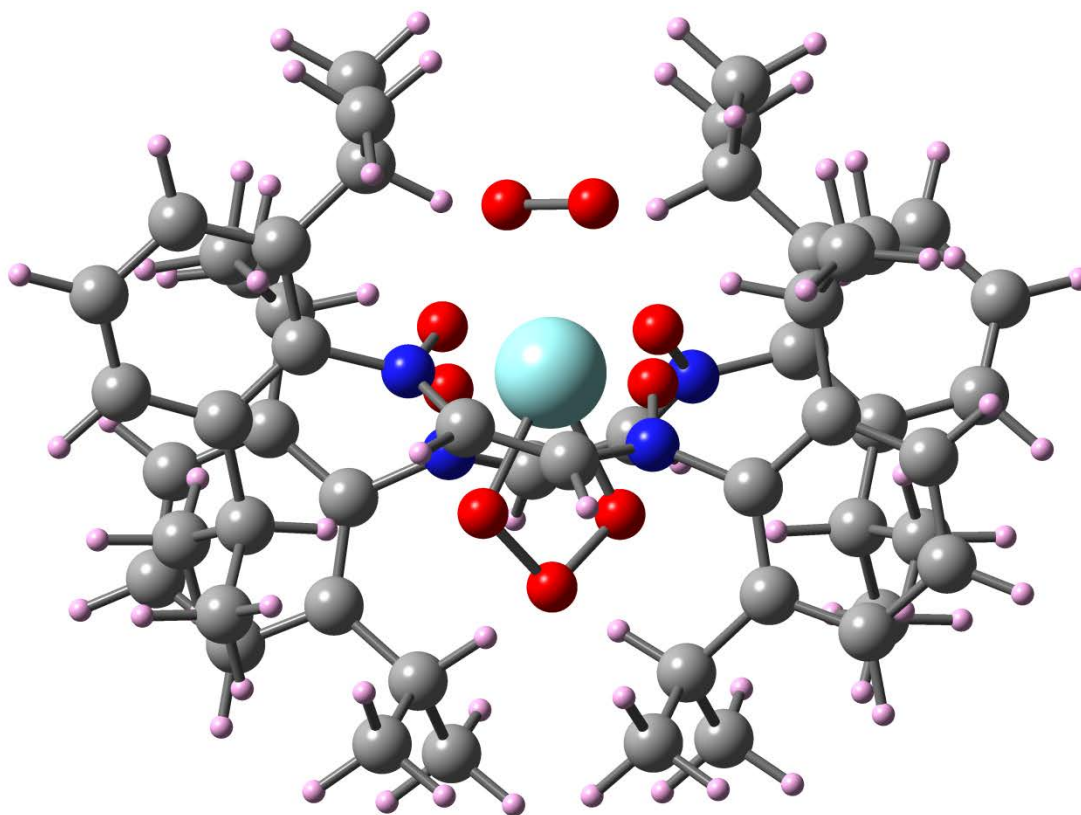Fig. S149: ONCCNO  $\eta^2$ -ozone Complex with adsorbed O<sub>2</sub> molecule

| SCF          | E <sub>ZP</sub> | H            | G            |
|--------------|-----------------|--------------|--------------|
| -2966.909914 | -2965.746415    | -2965.671645 | -2965.863149 |

|   |             |             |             |
|---|-------------|-------------|-------------|
| O | 0.81914484  | 2.01594444  | -0.37000122 |
| O | -0.81664045 | -2.01157619 | -0.36999786 |
| O | -1.04686678 | 0.47083566  | 1.28437467  |
| N | 2.50313064  | -2.12871141 | -0.52845521 |
| N | -0.51939965 | -3.05818526 | 0.44350615  |
| N | -2.50168875 | 2.11965157  | -0.53083467 |
| N | 0.51694053  | 3.06380916  | 0.44015431  |
| C | 2.01591828  | -3.13574246 | 0.22142228  |
| C | 0.72776010  | -3.52559896 | 0.65624976  |
| C | -2.01878305 | 3.12989396  | 0.21769409  |
| C | -0.73244360 | 3.52627032  | 0.65158342  |
| C | 3.92742534  | -2.08516540 | -0.86289809 |
| C | 4.31254234  | -2.53569096 | -2.15153942 |
| C | 5.68725083  | -2.49524571 | -2.46155563 |
| C | 6.62584389  | -2.02640440 | -1.52756307 |
| C | 6.20583247  | -1.56689695 | -0.27020927 |

|   |             |             |             |
|---|-------------|-------------|-------------|
| C | 4.84019985  | -1.56998412 | 0.08896625  |
| C | 3.12604896  | -1.93419765 | -4.30319579 |
| C | 3.29691290  | -3.00915555 | -3.19543236 |
| C | 3.67617754  | -4.38337556 | -3.80273852 |
| C | -3.34793693 | -3.48013343 | -2.12714563 |
| C | -2.33119356 | -4.41086941 | -1.41372159 |
| C | -2.38784000 | -5.84758170 | -1.99323890 |
| C | -1.68085459 | -3.74296097 | 1.00797975  |
| C | -2.56056307 | -4.39310158 | 0.10119386  |
| C | -3.68862082 | -5.03718329 | 0.64757277  |
| C | -3.92084803 | -5.04342916 | 2.03247360  |
| C | -3.03149692 | -4.39330314 | 2.89986699  |
| C | -1.89382271 | -3.71459086 | 2.41065166  |
| C | 4.85435140  | 0.46497422  | 1.60541667  |
| C | 4.40177995  | -1.00961544 | 1.44563281  |
| C | 4.93802623  | -1.87977538 | 2.61301463  |
| C | -1.75038802 | -1.94323119 | 4.23441834  |
| C | -0.97109707 | -2.98985538 | 3.39843182  |
| C | -0.24320902 | -4.00291936 | 4.32230099  |
| C | -3.92556721 | 2.06949611  | -0.86561676 |
| C | -4.83654370 | 1.55179577  | 0.08662517  |
| C | -6.20208558 | 1.54288649  | -0.27280104 |
| C | -6.62366299 | 1.99905549  | -1.53084570 |
| C | -5.68674981 | 2.47048381  | -2.46522393 |
| C | -4.31230275 | 2.51696427  | -2.15488444 |
| C | -4.84797455 | -0.47861616 | 1.60974369  |
| C | -4.39620215 | 0.99557539  | 1.44435920  |
| C | -4.93152284 | 1.86919013  | 2.60964204  |
| C | 3.34193821  | 3.50201115  | -2.13577705 |
| C | 2.31726142  | 4.42387603  | -1.42221015 |
| C | 2.35862728  | 5.86012754  | -2.00401233 |
| C | 1.67521632  | 3.75637615  | 1.00159062  |
| C | 2.54917176  | 4.41074113  | 0.09236080  |
| C | 3.67392473  | 5.06305870  | 0.63582299  |
| C | 3.90840497  | 5.07284436  | 2.02034211  |
| C | 3.02481509  | 4.41813861  | 2.89021832  |
| C | 1.89073279  | 3.73138713  | 2.40387456  |
| C | -3.12097949 | 1.91697655  | -4.30429528 |
| C | -3.29830905 | 2.99344606  | -3.19899286 |
| C | -3.68414670 | 4.36428807  | -3.80976088 |
| C | 1.76167510  | 1.96084699  | 4.22927613  |
| C | 0.97429331  | 3.00183410  | 3.39384508  |
| C | 0.24169667  | 4.01108903  | 4.31814965  |
| H | 2.80291396  | -3.79975627 | 0.56278282  |
| H | 0.73218791  | -4.41084436 | 1.28216496  |
| H | -2.80874168 | 3.79078748  | 0.55828242  |
| H | -0.74070453 | 4.41291282  | 1.27550374  |
| H | 6.02434536  | -2.83223331 | -3.43792934 |
| H | 7.68251794  | -2.00960492 | -1.78461343 |
| H | 6.94069584  | -1.18749545 | 0.43493668  |
| H | 2.31993371  | -3.11864043 | -2.71242431 |
| H | -1.33621476 | -4.00807892 | -1.62613122 |

|   |             |             |             |
|---|-------------|-------------|-------------|
| H | 4.07294563  | -1.75760110 | -4.83174112 |
| H | 2.77923923  | -0.98887529 | -3.87340156 |
| H | 2.38007066  | -2.26486916 | -5.03757534 |
| H | 4.61236765  | -4.33240534 | -4.37380750 |
| H | 2.88881712  | -4.71578776 | -4.49171425 |
| H | 3.79662912  | -5.14936576 | -3.02522716 |
| H | -4.38079768 | -3.81245093 | -1.95357961 |
| H | -3.16540672 | -3.48034024 | -3.20955961 |
| H | -3.24374931 | -2.45157639 | -1.76673542 |
| H | -1.67190670 | -6.51245560 | -1.49220811 |
| H | -2.14230817 | -5.82500154 | -3.06302113 |
| H | -3.38694621 | -6.29200258 | -1.89441675 |
| H | -4.38506314 | -5.54343829 | -0.01516019 |
| H | -4.79505906 | -5.55131022 | 2.43313464  |
| H | -3.22746092 | -4.39749994 | 3.96876275  |
| H | 3.30831945  | -1.00589354 | 1.49970752  |
| H | -0.21499012 | -2.42790242 | 2.84397894  |
| H | 5.94854263  | 0.56122951  | 1.59637455  |
| H | 4.48879260  | 0.86695756  | 2.55869938  |
| H | 4.44710787  | 1.08797685  | 0.80056015  |
| H | 6.03622317  | -1.89258534 | 2.63426993  |
| H | 4.59347473  | -2.91967473 | 2.53295756  |
| H | 4.58641334  | -1.48008955 | 3.57311078  |
| H | -2.19674212 | -1.18860446 | 3.57852463  |
| H | -1.06100124 | -1.42686630 | 4.91414139  |
| H | -2.54232962 | -2.40536316 | 4.83887336  |
| H | -0.95625041 | -4.56646454 | 4.93863847  |
| H | 0.44104300  | -3.47274926 | 4.99738000  |
| H | 0.34440366  | -4.73142508 | 3.74675380  |
| H | -6.93560457 | 1.16158722  | 0.43271194  |
| H | -7.68021480 | 1.97774627  | -1.78807504 |
| H | -6.02500382 | 2.80497322  | -3.44205985 |
| H | -3.30264077 | 0.99273008  | 1.49702255  |
| H | 1.32602856  | 4.01080068  | -1.63236242 |
| H | -5.94215599 | -0.57529114 | 1.60381135  |
| H | -4.48001650 | -0.87756876 | 2.56335950  |
| H | -4.44265522 | -1.10418581 | 0.80590290  |
| H | -4.58757765 | 2.90899352  | 2.52597843  |
| H | -4.57867751 | 1.47272254  | 3.57062339  |
| H | -6.02971741 | 1.88147564  | 2.63190754  |
| H | 4.37176664  | 3.84493476  | -1.96488398 |
| H | 3.15730576  | 3.49820526  | -3.21782207 |
| H | 3.24876348  | 2.47316359  | -1.77310307 |
| H | 1.63638960  | 6.51837979  | -1.50328233 |
| H | 2.11228764  | 5.83342943  | -3.07351866 |
| H | 3.35318114  | 6.31499338  | -1.90679189 |
| H | 4.36601872  | 5.57279307  | -0.02883110 |
| H | 4.77996425  | 5.58699852  | 2.41878447  |
| H | 3.22260286  | 4.42502676  | 3.95877415  |
| H | -2.32234804 | 3.10906943  | -2.71535863 |
| H | 0.22066245  | 2.43482383  | 2.84113966  |
| H | -4.06676158 | 1.73387204  | -4.83262481 |

|    |             |             |             |
|----|-------------|-------------|-------------|
| H  | -2.76889670 | 0.97463523  | -3.87226612 |
| H  | -2.37672207 | 2.25024512  | -5.03925854 |
| H  | -2.89740319 | 4.69968558  | -4.49799405 |
| H  | -3.81035390 | 5.13122275  | -3.03409866 |
| H  | -4.61894917 | 4.30683420  | -4.38249534 |
| H  | 2.21218664  | 1.20880108  | 3.57323291  |
| H  | 1.07669277  | 1.44030711  | 4.91025215  |
| H  | 2.55144590  | 2.42856568  | 4.83232595  |
| H  | -0.35159893 | 4.73524735  | 3.74294456  |
| H  | 0.95223508  | 4.57974644  | 4.93267077  |
| H  | -0.43800746 | 3.47725963  | 4.99494352  |
| O  | -0.42106228 | -0.54306852 | -2.72906148 |
| O  | 0.43903133  | 0.54553146  | -2.72689795 |
| O  | 0.00624512  | 0.00283266  | 2.23254713  |
| O  | 1.05697228  | -0.46809852 | 1.28316796  |
| O  | -1.76534908 | 1.13977591  | -1.12470425 |
| O  | 1.77176529  | -1.14585063 | -1.12267324 |
| Zr | 0.00463897  | 0.00116463  | -0.54597110 |

$\eta^3$ -ozone Complex with adsorbed O<sub>2</sub> molecule (conformation 1 lower energy)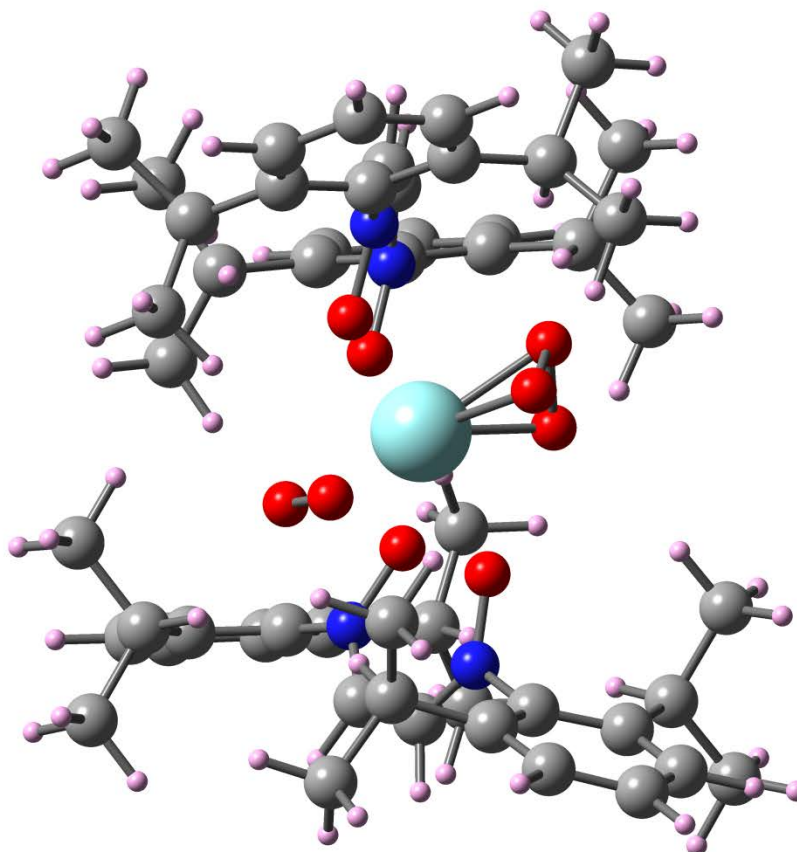

Fig. S150: ONCCNO  $\eta^3$ -ozone Complex with adsorbed O<sub>2</sub> molecule (conformation 1 lower energy)

| SCF          | E <sub>ZP</sub> | H            | G            |
|--------------|-----------------|--------------|--------------|
| -2966.890476 | -2965.726469    | -2965.650910 | -2965.844032 |

|   |             |             |             |
|---|-------------|-------------|-------------|
| O | -1.84264214 | -0.19310001 | -0.03342200 |
| O | 2.47628219  | -0.16304501 | -0.59571704 |
| O | 0.96980507  | 1.97296115  | -1.46174511 |
| N | 0.97876908  | -2.78821421 | 0.73602106  |
| N | 3.46269826  | -0.95897807 | -0.22780602 |
| N | -1.56349812 | 3.08829924  | 0.34654803  |
| N | -2.99770623 | 0.31216902  | -0.61372705 |
| C | 2.28923817  | -2.87682522 | 0.94698507  |
| C | 3.38843526  | -2.10775916 | 0.45197603  |
| C | -2.76913721 | 2.81552822  | -0.22056402 |
| C | -3.37709826 | 1.62255812  | -0.61954405 |
| C | 0.08416401  | -3.79297329 | 1.34043210  |
| C | -0.11864701 | -3.79375829 | 2.74341421  |
| C | -0.96669707 | -4.79759037 | 3.26034325  |
| C | -1.58605512 | -5.73222344 | 2.41892219  |

|   |             |             |             |
|---|-------------|-------------|-------------|
| C | -1.37120910 | -5.68884344 | 1.03211608  |
| C | -0.52614204 | -4.71980836 | 0.45488403  |
| C | -0.59140404 | -1.99033715 | 4.47432534  |
| C | 0.50349804  | -2.77158221 | 3.70258928  |
| C | 1.49060411  | -3.45518927 | 4.68533136  |
| C | 4.96299738  | 2.17625017  | 1.78284714  |
| C | 5.09369139  | 0.63572005  | 1.65179613  |
| C | 6.02076844  | 0.05809000  | 2.75234321  |
| C | 4.79481937  | -0.48723304 | -0.66580205 |
| C | 5.57637142  | 0.25462202  | 0.24843302  |
| C | 6.84019550  | 0.68717905  | -0.20874802 |
| C | 7.26932258  | 0.41112003  | -1.51574512 |
| C | 6.43955651  | -0.29101002 | -2.40588318 |
| C | 5.17012339  | -0.75556506 | -2.00439015 |
| C | -1.57127912 | -4.13387032 | -1.77222314 |
| C | -0.31243002 | -4.69962736 | -1.06230508 |
| C | 0.06485100  | -6.09657647 | -1.61795413 |
| C | 3.53680827  | -0.36987503 | -3.89223230 |
| C | 4.23112632  | -1.43991311 | -3.00255223 |
| C | 4.95061338  | -2.50598619 | -3.86472029 |
| C | -1.16200809 | 4.44784834  | 0.67124705  |
| C | -0.79511906 | 5.33456139  | -0.37435103 |
| C | -0.42014903 | 6.64604449  | -0.00874700 |
| C | -0.38692903 | 7.04611752  | 1.33484510  |
| C | -0.73779205 | 6.14014946  | 2.34905018  |
| C | -1.13874608 | 4.82468337  | 2.04114016  |
| C | 0.61107405  | 5.15393340  | -2.49028919 |
| C | -0.78524306 | 4.93587338  | -1.85417314 |
| C | -1.88094514 | 5.70211844  | -2.64327720 |
| C | -4.02359731 | -2.46940319 | 2.08582816  |
| C | -4.53551235 | -1.20676209 | 1.34809810  |
| C | -5.88309446 | -0.72185106 | 1.94448215  |
| C | -3.90896330 | -0.71051605 | -1.10884108 |
| C | -4.65263036 | -1.45629411 | -0.15788701 |
| C | -5.53550444 | -2.44126519 | -0.64545205 |
| C | -5.67363944 | -2.66731020 | -2.02485816 |
| C | -4.92613137 | -1.91351114 | -2.94195622 |
| C | -4.01904131 | -0.92231907 | -2.50685219 |
| C | -0.25817402 | 3.43626926  | 3.96828730  |
| C | -1.51884612 | 3.85867530  | 3.16765724  |
| C | -2.60105420 | 4.45604834  | 4.10316831  |
| C | -2.38541818 | -1.04032408 | -4.46176434 |
| C | -3.22008924 | -0.11838701 | -3.53754927 |
| C | -4.15815032 | 0.79617306  | -4.37029433 |
| H | 2.57606620  | -3.71554828 | 1.57052212  |
| H | 4.36156133  | -2.53653019 | 0.66063605  |
| H | -3.35570525 | 3.70836028  | -0.40667603 |
| H | -4.36260033 | 1.75172013  | -1.05428208 |
| H | -1.15272209 | -4.83429037 | 4.33005233  |
| H | -2.24065017 | -6.49060651 | 2.84152922  |
| H | -1.86003514 | -6.41626451 | 0.39074103  |
| H | 1.05444508  | -2.02056415 | 3.13094424  |

|   |             |             |             |
|---|-------------|-------------|-------------|
| H | 4.08834931  | 0.23309502  | 1.81417414  |
| H | -1.19108409 | -2.65098320 | 5.11458339  |
| H | -1.26254110 | -1.47448711 | 3.77901129  |
| H | -0.12261601 | -1.23071209 | 5.11187739  |
| H | 0.97910807  | -4.18837632 | 5.32262241  |
| H | 1.95009815  | -2.70368721 | 5.34013643  |
| H | 2.29634618  | -3.98281631 | 4.15590632  |
| H | 5.93461844  | 2.67540620  | 1.66848313  |
| H | 4.55956135  | 2.43289019  | 2.77008521  |
| H | 4.27719133  | 2.57423920  | 1.02681708  |
| H | 6.09367145  | -1.03622008 | 2.68868221  |
| H | 5.63102845  | 0.31680702  | 3.74510529  |
| H | 7.03758655  | 0.46497504  | 2.67597020  |
| H | 7.48086759  | 1.25719110  | 0.45844904  |
| H | 8.24469362  | 0.75816006  | -1.84824614 |
| H | 6.77679350  | -0.47217604 | -3.42203526 |
| H | 0.51163004  | -4.01822731 | -1.29881210 |
| H | 3.43366726  | -1.95108715 | -2.44886919 |
| H | -2.45398119 | -4.75590037 | -1.57085212 |
| H | -1.41190011 | -4.11082731 | -2.85802122 |
| H | -1.77828214 | -3.11377724 | -1.43506111 |
| H | -0.75587406 | -6.81702251 | -1.50929511 |
| H | 0.94718507  | -6.51076250 | -1.11202608 |
| H | 0.29053202  | -6.01787744 | -2.68925020 |
| H | 2.93922322  | 0.31804602  | -3.28612425 |
| H | 2.86185122  | -0.85904107 | -4.60609435 |
| H | 4.28072833  | 0.20653602  | -4.45943334 |
| H | 5.68968441  | -2.05388416 | -4.53814535 |
| H | 4.21748632  | -3.02896523 | -4.49189634 |
| H | 5.46706843  | -3.25144125 | -3.24531425 |
| H | -0.13671301 | 7.35199457  | -0.78499606 |
| H | -0.08498801 | 8.05899659  | 1.59204412  |
| H | -0.70794005 | 6.45962048  | 3.38757226  |
| H | -0.99364407 | 3.86598129  | -1.93519515 |
| H | -3.79291729 | -0.42013403 | 1.51139912  |
| H | 0.92126607  | 6.20716848  | -2.45199619 |
| H | 0.59074304  | 4.84424437  | -3.54341927 |
| H | 1.35787010  | 4.53843235  | -1.97902815 |
| H | -2.88129222 | 5.52777141  | -2.22365717 |
| H | -1.88992214 | 5.37433943  | -3.69108728 |
| H | -1.69883013 | 6.78521250  | -2.63015820 |
| H | -4.72477036 | -3.30896725 | 1.98383815  |
| H | -3.90458130 | -2.26027917 | 3.15751424  |
| H | -3.05262023 | -2.78317821 | 1.68759113  |
| H | -6.23556249 | 0.18944001  | 1.44436511  |
| H | -5.76592742 | -0.50020404 | 3.01375023  |
| H | -6.66627049 | -1.48519211 | 1.84414614  |
| H | -6.12328347 | -3.02863323 | 0.05585500  |
| H | -6.36393947 | -3.42779726 | -2.38344018 |
| H | -5.04036539 | -2.09867116 | -4.00690331 |
| H | -1.92791215 | 2.94707222  | 2.72215021  |
| H | -2.50504519 | 0.51949404  | -3.01186123 |



|    |             |             |             |
|----|-------------|-------------|-------------|
| H  | 0.22213902  | 4.30488833  | 4.44039134  |
| H  | 0.46653104  | 2.94805522  | 3.30858025  |
| H  | -0.53297904 | 2.72693621  | 4.76111637  |
| H  | -2.89425922 | 3.71337728  | 4.85728037  |
| H  | -3.49920427 | 4.74730136  | 3.54264427  |
| H  | -2.23533717 | 5.34272543  | 4.63740836  |
| H  | -1.66864613 | -1.62143512 | -3.87312830 |
| H  | -1.81095714 | -0.43095903 | -5.17079940 |
| H  | -3.02023323 | -1.72756413 | -5.03815638 |
| H  | -4.73144336 | 1.47890511  | -3.72874929 |
| H  | -4.87577437 | 0.20576602  | -4.95636938 |
| H  | -3.56850327 | 1.40294511  | -5.06971239 |
| O  | 1.61011012  | 0.99664107  | 1.64302613  |
| O  | 0.76665506  | -0.06905001 | 1.95773915  |
| O  | -0.29551402 | 1.39717611  | -2.10237216 |
| O  | 0.05260100  | -0.08702901 | -2.24517117 |
| O  | -0.72111706 | 2.10355816  | 0.82777406  |
| O  | 0.39373303  | -1.91943915 | -0.09911601 |
| Zr | 0.20432102  | 0.44060603  | -0.16224101 |

$\eta^3$ -ozone Complex with adsorbed O<sub>2</sub> molecule (conformation 2 higher energy)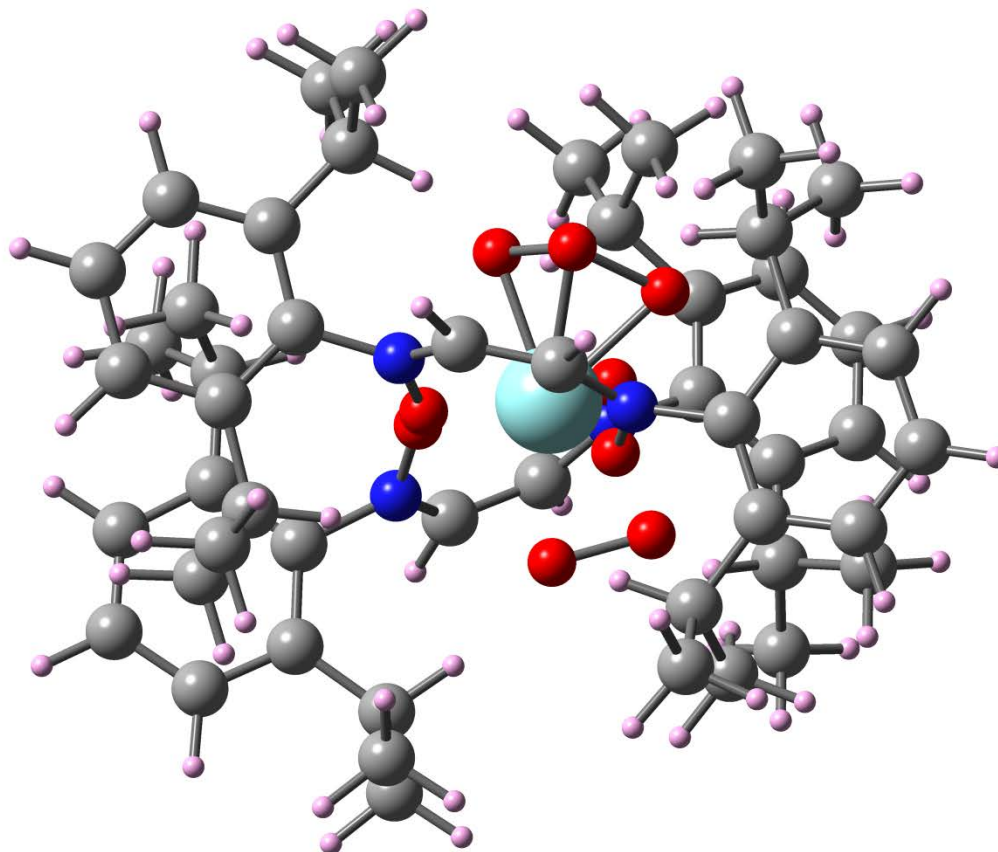

Fig. S151: ONCCNO  $\eta^3$ -ozone Complex with adsorbed O<sub>2</sub> molecule (conformation 2 higher energy)

| SCF          | E <sub>ZP</sub> | H            | G            |
|--------------|-----------------|--------------|--------------|
| -2966.890307 | -2965.726597    | -2965.650910 | -2965.845550 |

|   |             |             |             |
|---|-------------|-------------|-------------|
| O | -1.85908414 | -0.11451001 | 0.04152500  |
| O | 2.45750019  | -0.22369802 | -0.64456205 |
| O | 1.00762008  | 1.91407015  | -1.50833812 |
| N | 0.89348207  | -2.83922722 | 0.64892005  |
| N | 3.42437526  | -1.04561708 | -0.27785302 |
| N | -1.45360911 | 3.14301124  | 0.39276203  |
| N | -3.00167123 | 0.41815403  | -0.54005804 |
| C | 2.20282017  | -2.96364023 | 0.84991007  |
| C | 3.31913125  | -2.20790817 | 0.37443803  |
| C | -2.68408721 | 2.90753022  | -0.13776001 |
| C | -3.34050126 | 1.73872913  | -0.53232604 |
| C | -0.01990400 | -3.83816129 | 1.23375909  |
| C | -0.21154402 | -3.86981430 | 2.63831420  |
| C | -1.07732408 | -4.86769837 | 3.13676024  |
| C | -1.72483813 | -5.76613846 | 2.27709517  |

|   |             |             |             |
|---|-------------|-------------|-------------|
| C | -1.52058111 | -5.69197744 | 0.89012407  |
| C | -0.65761605 | -4.72825136 | 0.33047703  |
| C | -0.62709705 | -2.10443216 | 4.42412034  |
| C | 0.44191303  | -2.88627122 | 3.61768827  |
| C | 1.42691211  | -3.61598928 | 4.56881735  |
| C | 5.12196539  | 1.86312114  | 1.97861915  |
| C | 5.13032339  | 0.33502303  | 1.71056513  |
| C | 6.00328046  | -0.40942703 | 2.75409621  |
| C | 4.77167736  | -0.59188304 | -0.68621705 |
| C | 5.58924943  | 0.04035300  | 0.27821502  |
| C | 6.87074755  | 0.44813203  | -0.15159101 |
| C | 7.28335054  | 0.25644802  | -1.47888911 |
| C | 6.41871249  | -0.33264503 | -2.41630118 |
| C | 5.13030539  | -0.76911706 | -2.04456616 |
| C | -1.71403913 | -4.10339532 | -1.88199014 |
| C | -0.45157503 | -4.67896336 | -1.18714609 |
| C | -0.07393301 | -6.06608745 | -1.76748313 |
| C | 3.52970727  | -0.16630501 | -3.90111730 |
| C | 4.16104132  | -1.33209110 | -3.08822424 |
| C | 4.82837637  | -2.37215918 | -4.02149431 |
| C | -1.01519008 | 4.49122634  | 0.72053606  |
| C | -0.64179905 | 5.37385143  | -0.32536102 |
| C | -0.23498202 | 6.67555052  | 0.04145000  |
| C | -0.17685901 | 7.06770356  | 1.38661310  |
| C | -0.53141604 | 6.16352745  | 2.40129618  |
| C | -0.96345507 | 4.85815637  | 2.09192616  |
| C | 0.74585505  | 5.15393940  | -2.44769119 |
| C | -0.65387105 | 4.97776838  | -1.80572914 |
| C | -1.72925213 | 5.77791345  | -2.58854920 |
| C | -4.03852731 | -2.40547818 | 2.13036916  |
| C | -4.52307335 | -1.11343709 | 1.42587411  |
| C | -5.84333843 | -0.59760205 | 2.05650516  |
| C | -3.94366130 | -0.57605705 | -1.03466508 |
| C | -4.67736536 | -1.32985710 | -0.08183501 |
| C | -5.59057941 | -2.28718817 | -0.56827204 |
| C | -5.76804143 | -2.47986719 | -1.94818015 |
| C | -5.03112038 | -1.71821813 | -2.86715222 |
| C | -4.09544631 | -0.75294406 | -2.43408818 |
| C | -0.07130501 | 3.42999526  | 3.98370730  |
| C | -1.34019410 | 3.88862029  | 3.21645125  |
| C | -2.38832818 | 4.49734734  | 4.18272732  |
| C | -2.52624320 | -0.84732407 | -4.44402434 |
| C | -3.31433425 | 0.06323400  | -3.46927627 |
| C | -4.26276533 | 1.01624508  | -4.24573532 |
| H | 2.47194119  | -3.82545829 | 1.44929411  |
| H | 4.28116133  | -2.66340220 | 0.57778804  |
| H | -3.24913425 | 3.81938829  | -0.29671002 |
| H | -4.32934033 | 1.90381015  | -0.94658207 |
| H | -1.25541109 | -4.92837438 | 4.20675932  |
| H | -2.39302818 | -6.52008750 | 2.68614120  |
| H | -2.03157016 | -6.39093550 | 0.23450402  |
| H | 1.00040308  | -2.13034716 | 3.05976123  |

|   |             |             |             |
|---|-------------|-------------|-------------|
| H | 4.09504531  | 0.00187100  | 1.83757714  |
| H | -1.23846709 | -2.77027121 | 5.04754238  |
| H | -1.29006510 | -1.54987612 | 3.75132928  |
| H | -0.13395401 | -1.37859111 | 5.08244239  |
| H | 0.90801607  | -4.35449833 | 5.19389439  |
| H | 1.91091014  | -2.89174822 | 5.23660540  |
| H | 2.21415417  | -4.14659132 | 4.01514130  |
| H | 6.12984648  | 2.29280818  | 1.90512415  |
| H | 4.73790736  | 2.06195016  | 2.98682723  |
| H | 4.47152234  | 2.38001918  | 1.26428809  |
| H | 5.99228643  | -1.49613312 | 2.59263120  |
| H | 5.62967741  | -0.21164702 | 3.76693829  |
| H | 7.04898154  | -0.07766101 | 2.71238821  |
| H | 7.53854055  | 0.93515707  | 0.55370204  |
| H | 8.27315261  | 0.58286504  | -1.78884913 |
| H | 6.74338051  | -0.44809703 | -3.44601326 |
| H | 0.36982703  | -3.99189630 | -1.41513711 |
| H | 3.33403226  | -1.83607114 | -2.57333120 |
| H | -2.59537620 | -4.73002936 | -1.68912113 |
| H | -1.55846112 | -4.05985631 | -2.96769223 |
| H | -1.92200415 | -3.08990524 | -1.52586012 |
| H | -0.89096807 | -6.79124353 | -1.66213013 |
| H | 0.81403106  | -6.48440048 | -1.27485610 |
| H | 0.14315101  | -5.97091243 | -2.83924822 |
| H | 2.97510923  | 0.51334904  | -3.24638025 |
| H | 2.82422722  | -0.56531904 | -4.64094736 |
| H | 4.30535833  | 0.40157103  | -4.43358234 |
| H | 5.60021541  | -1.91569214 | -4.65417835 |
| H | 4.07365331  | -2.80483321 | -4.69043336 |
| H | 5.29381538  | -3.18960624 | -3.45455226 |
| H | 0.05319800  | 7.37958058  | -0.73482805 |
| H | 0.14853301  | 8.07304963  | 1.64480412  |
| H | -0.47918904 | 6.47664152  | 3.44089826  |
| H | -0.89620407 | 3.91492530  | -1.88712615 |
| H | -3.75247029 | -0.35445303 | 1.58922512  |
| H | 1.08705908  | 6.19763647  | -2.40968519 |
| H | 0.71227505  | 4.84535137  | -3.50072127 |
| H | 1.47693612  | 4.51668735  | -1.94026515 |
| H | -2.73268521 | 5.63067543  | -2.16600016 |
| H | -1.75113913 | 5.45345641  | -3.63719028 |
| H | -1.51616812 | 6.85533251  | -2.57334919 |
| H | -4.76940137 | -3.21959425 | 2.03054716  |
| H | -3.88933130 | -2.21934517 | 3.20250524  |
| H | -3.08770324 | -2.74472021 | 1.70528613  |
| H | -6.17568545 | 0.33358703  | 1.57976212  |
| H | -5.69943546 | -0.39967503 | 3.12720124  |
| H | -6.65224952 | -1.33381710 | 1.95717115  |
| H | -6.17189750 | -2.87875022 | 0.13487001  |
| H | -6.48105248 | -3.21972124 | -2.30545518 |
| H | -5.17604239 | -1.87692314 | -3.93265730 |
| H | -1.77863314 | 2.99102523  | 2.76978721  |
| H | -2.57185619 | 0.67459405  | -2.95023123 |

|    |             |             |             |
|----|-------------|-------------|-------------|
| H  | 0.43848603  | 4.28267433  | 4.45386934  |
| H  | 0.62780405  | 2.93366423  | 3.30276325  |
| H  | -0.34391103 | 2.71806321  | 4.77491537  |
| H  | -2.68106920 | 3.75141329  | 4.93369137  |
| H  | -3.29171225 | 4.81527337  | 3.64574228  |
| H  | -1.99134215 | 5.36856442  | 4.71997136  |
| H  | -1.79484114 | -1.44824811 | -3.89480030 |
| H  | -1.97165415 | -0.22853802 | -5.16081639 |
| H  | -3.18997624 | -1.51418411 | -5.01129838 |
| H  | -4.80004637 | 1.69295113  | -3.56755527 |
| H  | -5.01187438 | 0.45470903  | -4.82051237 |
| H  | -3.68604828 | 1.62952913  | -4.95033138 |
| O  | 1.64956113  | 0.89603907  | 1.63813113  |
| O  | 0.76873906  | -0.14605301 | 1.93020115  |
| O  | -0.30649302 | 1.40301011  | -2.09908416 |
| O  | -0.04103300 | -0.09921201 | -2.24315017 |
| O  | -0.60660505 | 2.14273317  | 0.82575606  |
| O  | 0.32343802  | -1.93340215 | -0.15657001 |
| Zr | 0.20631202  | 0.42496803  | -0.17229201 |

## 10.7 Structures with ten oxygen atoms

 $\eta^2$ -ozone Complex with adsorbed ozone group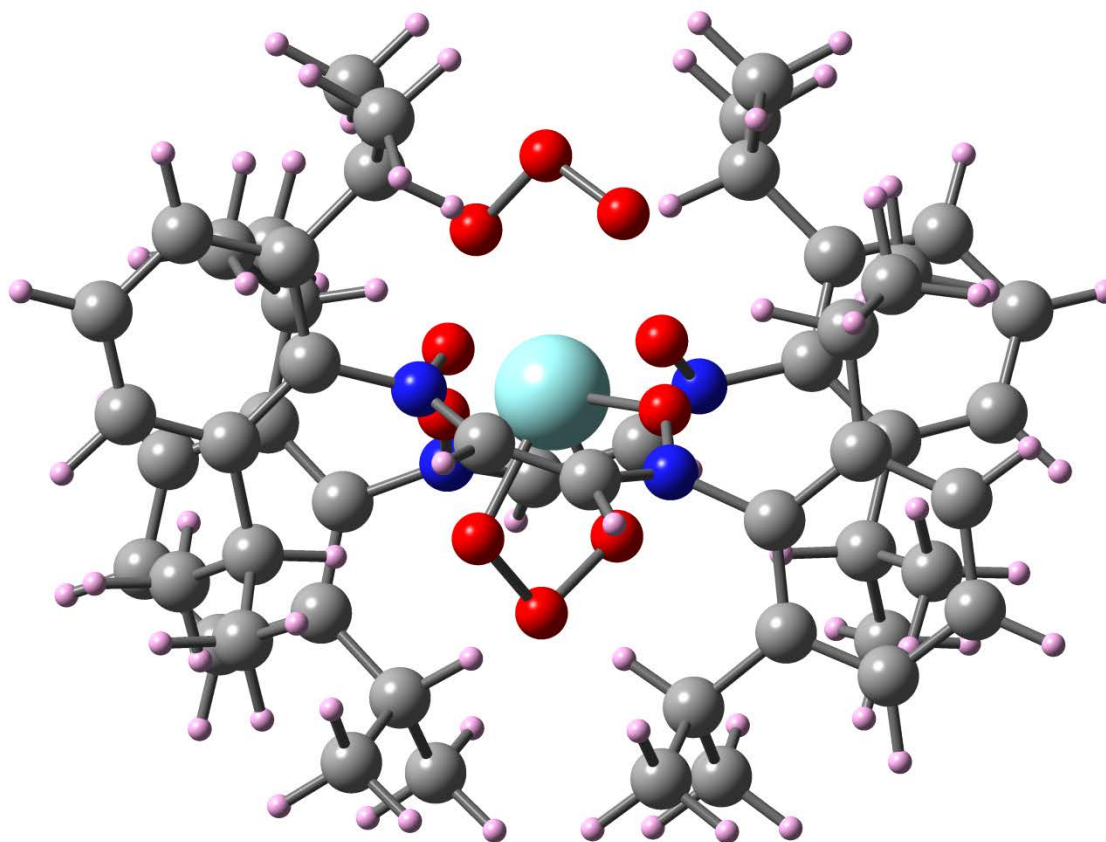Fig. S152: ONCCNO  $\eta^2$ -ozone Complex with adsorbed ozone group

| SCF          | E <sub>ZP</sub> | H            | G            |
|--------------|-----------------|--------------|--------------|
| -3042.051659 | -3040.883871    | -3040.807325 | -3041.003191 |

|   |             |             |             |
|---|-------------|-------------|-------------|
| O | 0.84132973  | 1.93415340  | -0.26635814 |
| O | -0.91968998 | -2.01291893 | -0.12053873 |
| O | -1.13438962 | 0.40932115  | 1.38913413  |
| N | 2.42452460  | -2.09778612 | -0.49192172 |
| N | -0.55179230 | -3.11286129 | 0.52128731  |
| N | -2.46095866 | 2.29485390  | -0.51344371 |
| N | 0.60485445  | 3.06558246  | 0.48658446  |
| C | 1.98696459  | -3.10712876 | 0.25715134  |
| C | 0.70065147  | -3.55349459 | 0.68934597  |
| C | -1.89974788 | 3.35145671  | 0.13460483  |
| C | -0.61032862 | 3.67325262  | 0.57371964  |
| C | 3.85606215  | -2.00554890 | -0.82106329 |
| C | 4.24874602  | -2.40616264 | -2.12277736 |
| C | 5.62393096  | -2.33042810 | -2.42353687 |

|   |             |             |             |
|---|-------------|-------------|-------------|
| C | 6.54896709  | -1.87338174 | -1.47070963 |
| C | 6.11573946  | -1.45997312 | -0.20200579 |
| C | 4.74984253  | -1.50054813 | 0.15370452  |
| C | 3.10505270  | -1.78299009 | -4.29034672 |
| C | 3.25045566  | -2.86796848 | -3.18878579 |
| C | 3.64141178  | -4.23784821 | -3.79937764 |
| C | -3.31777801 | -3.63590142 | -2.13126767 |
| C | -2.21229769 | -4.48901104 | -1.45310362 |
| C | -2.09830035 | -5.88614829 | -2.11515420 |
| C | -1.67457248 | -3.92573446 | 1.02358313  |
| C | -2.46765318 | -4.59142490 | 0.05473046  |
| C | -3.54587370 | -5.36061797 | 0.53791572  |
| C | -3.80999412 | -5.45458408 | 1.91384563  |
| C | -3.00887914 | -4.76878817 | 2.83865840  |
| C | -1.92184758 | -3.97221739 | 2.41722931  |
| C | 4.75374333  | 0.47724317  | 1.74555228  |
| C | 4.29915891  | -0.98898485 | 1.52604030  |
| C | 4.82491899  | -1.90332994 | 2.66465268  |
| C | -1.99954976 | -2.21657674 | 4.25152892  |
| C | -1.10189015 | -3.19859925 | 3.45568192  |
| C | -0.35162302 | -4.16552261 | 4.40959877  |
| C | -3.88146273 | 2.28496611  | -0.83272136 |
| C | -4.80709624 | 1.92656791  | 0.17896184  |
| C | -6.17729018 | 1.95536272  | -0.15910368 |
| C | -6.59615790 | 2.29684511  | -1.45449635 |
| C | -5.65121249 | 2.61122427  | -2.44491248 |
| C | -4.27075835 | 2.61123317  | -2.15673830 |
| C | -4.92728518 | 0.11432100  | 1.96043123  |
| C | -4.36858517 | 1.51116817  | 1.58658283  |
| C | -4.78991366 | 2.57107171  | 2.63904938  |
| C | 3.52085930  | 3.25219858  | -2.01866894 |
| C | 2.55019784  | 4.25603945  | -1.34134028 |
| C | 2.71120756  | 5.67704057  | -1.93958089 |
| C | 1.79682600  | 3.66612906  | 1.06266979  |
| C | 2.74346328  | 4.24793786  | 0.17797718  |
| C | 3.89888423  | 4.81902802  | 0.74903657  |
| C | 4.09320307  | 4.82256876  | 2.14020826  |
| C | 3.14034302  | 4.23849438  | 2.98822029  |
| C | 1.97558823  | 3.63179408  | 2.46966729  |
| C | -3.21829420 | 1.76998129  | -4.29805502 |
| C | -3.25189133 | 2.92072393  | -3.25669590 |
| C | -3.52831377 | 4.28511542  | -3.93785790 |
| C | 1.64901883  | 1.89578090  | 4.30713905  |
| C | 0.97196067  | 2.97411073  | 3.42381599  |
| C | 0.26260115  | 4.03916361  | 4.30271664  |
| H | 2.79276723  | -3.75405440 | 0.58678526  |
| H | 0.73699533  | -4.47758981 | 1.25473747  |
| H | -2.64224520 | 4.10458558  | 0.37664973  |
| H | -0.55145238 | 4.61335042  | 1.11164699  |
| H | 5.97108484  | -2.62961518 | -3.40853455 |
| H | 7.60594863  | -1.82811432 | -1.72214675 |
| H | 6.84008289  | -1.08606017 | 0.51623297  |

|   |             |             |             |
|---|-------------|-------------|-------------|
| H | 2.26227681  | -2.97995409 | -2.72970131 |
| H | -1.26849426 | -3.96184609 | -1.62655365 |
| H | 4.05930661  | -1.61484060 | -4.80788783 |
| H | 2.76698072  | -0.83483973 | -3.85961604 |
| H | 2.36331740  | -2.09986893 | -5.03456705 |
| H | 4.59399305  | -4.18451257 | -4.34201183 |
| H | 2.87289970  | -4.55938623 | -4.51404019 |
| H | 3.73678630  | -5.01307255 | -3.02738883 |
| H | -4.30971945 | -4.08747070 | -1.99234898 |
| H | -3.12142569 | -3.55610471 | -3.20749703 |
| H | -3.32910178 | -2.62188039 | -1.71941815 |
| H | -1.31699596 | -6.49589220 | -1.64206235 |
| H | -1.84785188 | -5.77276535 | -3.17764760 |
| H | -3.04211364 | -6.44313333 | -2.05648307 |
| H | -4.18082910 | -5.88857547 | -0.16795396 |
| H | -4.64585200 | -6.05556354 | 2.26393253  |
| H | -3.23626445 | -4.83673526 | 3.89885092  |
| H | 3.20496629  | -0.98251462 | 1.57337820  |
| H | -0.36038821 | -2.57605576 | 2.94721024  |
| H | 5.84803795  | 0.57011119  | 1.76087608  |
| H | 4.37202361  | 0.84620316  | 2.70527197  |
| H | 4.36323659  | 1.13203017  | 0.95823564  |
| H | 5.92279652  | -1.91636003 | 2.69450620  |
| H | 4.48258358  | -2.94061091 | 2.54546759  |
| H | 4.46494868  | -1.53869662 | 3.63520516  |
| H | -2.47108775 | -1.49639702 | 3.57470843  |
| H | -1.38636223 | -1.65145110 | 4.96445947  |
| H | -2.78358475 | -2.74050294 | 4.81488383  |
| H | -1.05151325 | -4.77915983 | 4.99188347  |
| H | 0.26301295  | -3.59397233 | 5.11672362  |
| H | 0.31056142  | -4.84935532 | 3.86036002  |
| H | -6.91786221 | 1.69486654  | 0.59273270  |
| H | -7.65694232 | 2.30853471  | -1.69510518 |
| H | -5.98735889 | 2.85849506  | -3.44855213 |
| H | -3.27792520 | 1.42329966  | 1.60870378  |
| H | 1.53657271  | 3.91163127  | -1.56756886 |
| H | -6.02513828 | 0.10600789  | 1.99704301  |
| H | -4.55606730 | -0.18138252 | 2.95037941  |
| H | -4.60042453 | -0.64185381 | 1.23700582  |
| H | -4.36670576 | 3.55770914  | 2.40781187  |
| H | -4.43580067 | 2.27642913  | 3.63574624  |
| H | -5.88234568 | 2.67794775  | 2.68543115  |
| H | 4.56927584  | 3.51869671  | -1.82394974 |
| H | 3.36267963  | 3.24884471  | -3.10478133 |
| H | 3.33854272  | 2.23738706  | -1.65017088 |
| H | 2.02592298  | 6.39220536  | -1.46578867 |
| H | 2.49159065  | 5.65429632  | -3.01501600 |
| H | 3.73376379  | 6.05887709  | -1.81931309 |
| H | 4.64571268  | 5.27149984  | 0.10203634  |
| H | 4.98737795  | 5.27695199  | 2.56119756  |
| H | 3.30682785  | 4.23997818  | 4.06234792  |
| H | -2.25466777 | 2.96780487  | -2.80745503 |



|    |             |             |             |
|----|-------------|-------------|-------------|
| H  | 0.20936164  | 2.45534571  | 2.83618842  |
| H  | -4.18999865 | 1.65855092  | -4.79910341 |
| H  | -2.96206515 | 0.82092239  | -3.81542020 |
| H  | -2.45991022 | 1.97597122  | -5.06459374 |
| H  | -2.74648968 | 4.49846194  | -4.67856020 |
| H  | -3.53878119 | 5.10410559  | -3.20652338 |
| H  | -4.49269728 | 4.29004346  | -4.46289093 |
| H  | 2.07863865  | 1.10563688  | 3.68232636  |
| H  | 0.90115496  | 1.43085284  | 4.96205318  |
| H  | 2.43952755  | 2.32044828  | 4.94079232  |
| H  | -0.25212959 | 4.79158638  | 3.69038274  |
| H  | 0.97900763  | 4.56703411  | 4.94663893  |
| H  | -0.48364785 | 3.55919133  | 4.94916589  |
| O  | -0.82056849 | -0.98480103 | -2.45044080 |
| O  | 0.58458310  | 0.80657209  | -2.70062629 |
| O  | -0.12866026 | -0.18158855 | 2.32267623  |
| O  | 0.94730474  | -0.57081544 | 1.36082692  |
| O  | -1.77827586 | 1.19969043  | -0.99853708 |
| O  | 1.66227425  | -1.15454409 | -1.07348188 |
| O  | -0.16167195 | -0.15071551 | -3.39800910 |
| Zr | -0.09624545 | 0.06383775  | -0.44320917 |

## 11. ONCCNO Singlet Transition States

### Spiro Bisperoxo Complex to Oxo Peroxo Complex (conformation 1 lower energy)

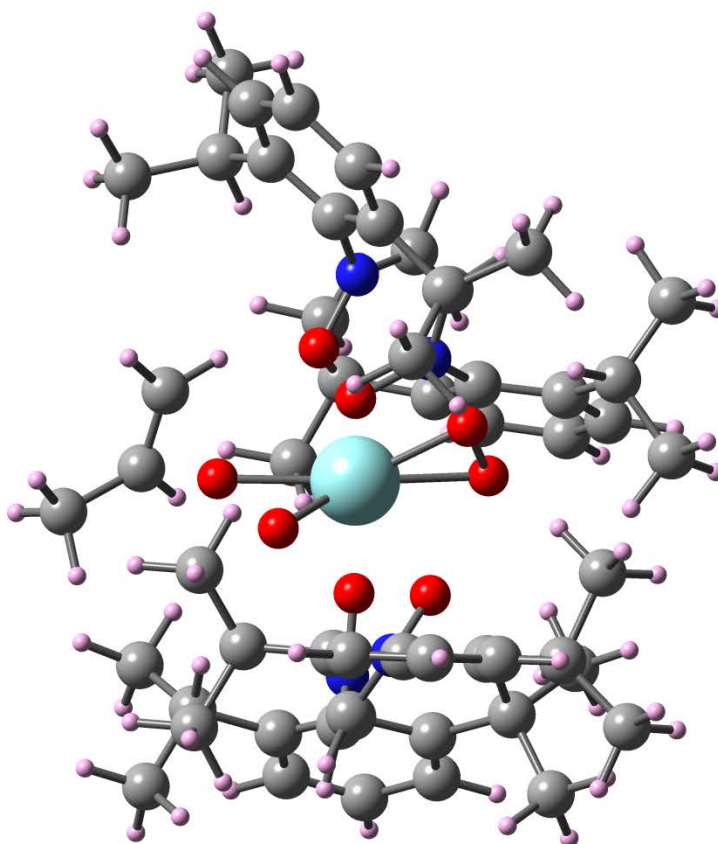

Fig. S153: ONCCNO Spiro Bisperoxo Complex to Oxo Peroxo Complex (conformation 1 lower energy)

| SCF          | E <sub>ZP</sub> | H            | G            | imag freq (cm <sup>-1</sup> ) |
|--------------|-----------------|--------------|--------------|-------------------------------|
| -3009.592624 | -3008.348352    | -3008.270247 | -3008.465555 | -488                          |

|   |             |             |             |
|---|-------------|-------------|-------------|
| O | -1.96015315 | -0.02790000 | -0.54562104 |
| O | 2.50543719  | -0.49344704 | -0.70560606 |
| O | 0.45792804  | 1.55616312  | -1.59347512 |
| N | 0.65720805  | -2.70832321 | 0.97378807  |
| N | 3.38325726  | -1.20286709 | 0.00947900  |
| N | -1.10433408 | 3.17042024  | 0.07079801  |
| N | -3.02309123 | 0.74872106  | -0.76380806 |
| C | 1.91965515  | -2.74793521 | 1.41050711  |
| C | 3.11361024  | -2.13965116 | 0.93117507  |
| C | -2.18192517 | 3.15736524  | -0.71142205 |
| C | -3.09029524 | 2.07809416  | -0.92654707 |
| C | -0.40131203 | -3.43779826 | 1.67590313  |
| C | -0.60857105 | -3.22637325 | 3.07292324  |

|   |             |             |             |
|---|-------------|-------------|-------------|
| C | -1.64720712 | -3.95849630 | 3.68670028  |
| C | -2.45430219 | -4.84654737 | 2.96374623  |
| C | -2.21254117 | -5.04934238 | 1.59858212  |
| C | -1.17355309 | -4.37322333 | 0.92691207  |
| C | -0.67087105 | -1.28596510 | 4.73769136  |
| C | 0.22076502  | -2.28777417 | 3.96361530  |
| C | 1.10128908  | -3.10854524 | 4.94696538  |
| C | 4.15400232  | 2.48293219  | 0.87896507  |
| C | 4.45550034  | 1.08490508  | 1.48401511  |
| C | 5.12262139  | 1.21495509  | 2.87624722  |
| C | 4.78555736  | -0.82667706 | -0.22498502 |
| C | 5.30686939  | 0.26583902  | 0.50980804  |
| C | 6.65543649  | 0.60683805  | 0.27206802  |
| C | 7.43046256  | -0.10335101 | -0.65907605 |
| C | 6.86875451  | -1.16257409 | -1.38941011 |
| C | 5.52373141  | -1.54248012 | -1.19593109 |
| C | -2.06285516 | -4.15449532 | -1.43536311 |
| C | -0.92430507 | -4.72025436 | -0.54730504 |
| C | -0.75821306 | -6.24751047 | -0.76101106 |
| C | 4.93941838  | -2.28439417 | -3.54937727 |
| C | 4.91020238  | -2.66008920 | -2.04432116 |
| C | 5.61487341  | -4.01929931 | -1.79796514 |
| C | -0.33524303 | 4.39817633  | 0.29699602  |
| C | 0.27582802  | 5.06116138  | -0.80114606 |
| C | 0.99389507  | 6.24139350  | -0.50705404 |
| C | 1.11723309  | 6.71645549  | 0.80544906  |
| C | 0.51933204  | 6.02010644  | 1.86789114  |
| C | -0.22594402 | 4.84554537  | 1.64410412  |
| C | 1.66024212  | 4.39158334  | -2.82868722 |
| C | 0.23188502  | 4.56248935  | -2.25220517 |
| C | -0.61482405 | 5.51197441  | -3.14090624 |
| C | -4.30223633 | -0.84502806 | 2.85045922  |
| C | -4.34228733 | 0.28484302  | 1.79157914  |
| C | -5.12399439 | 1.51518211  | 2.32759618  |
| C | -4.30087933 | 0.00618200  | -0.77966406 |
| C | -4.94081438 | -0.19900001 | 0.46635804  |
| C | -6.18420346 | -0.86489306 | 0.43992703  |
| C | -6.74088253 | -1.30983110 | -0.76989406 |
| C | -6.05829044 | -1.11473208 | -1.98096415 |
| C | -4.80861337 | -0.45907203 | -2.01383115 |
| C | 0.20552002  | 3.28805025  | 3.59612427  |
| C | -0.86436807 | 4.11751332  | 2.83431521  |
| C | -1.60575812 | 5.08848439  | 3.78806729  |
| C | -3.99942631 | -1.57158112 | -4.15985332 |
| C | -4.06876731 | -0.25842402 | -3.34012626 |
| C | -4.73111336 | 0.86613206  | -4.18252432 |
| H | 2.07020116  | -3.37464826 | 2.28026917  |
| H | 4.00965531  | -2.49176119 | 1.43142011  |
| H | -2.47139619 | 4.11322631  | -1.12919109 |
| H | -4.07412631 | 2.39430618  | -1.25837409 |
| H | -1.83170814 | -3.81617829 | 4.74759236  |
| H | -3.25710625 | -5.38430241 | 3.46270126  |

|   |             |             |             |
|---|-------------|-------------|-------------|
| H | -2.82497922 | -5.75734845 | 1.04718408  |
| H | 0.86047306  | -1.66717613 | 3.33534826  |
| H | 3.48850426  | 0.59378704  | 1.63090813  |
| H | -1.38579711 | -1.78445114 | 5.40665941  |
| H | -1.20820509 | -0.65643305 | 4.02300331  |
| H | -0.03698000 | -0.63201205 | 5.35169843  |
| H | 0.48542404  | -3.69493428 | 5.64210646  |
| H | 1.72928013  | -2.43206319 | 5.54149642  |
| H | 1.76354613  | -3.81567829 | 4.42632734  |
| H | 5.07674539  | 3.06120324  | 0.72789305  |
| H | 3.49887627  | 3.04699123  | 1.55455012  |
| H | 3.64066128  | 2.38748418  | -0.08436801 |
| H | 5.33383340  | 0.23067802  | 3.31544925  |
| H | 4.44975334  | 1.75225913  | 3.55649727  |
| H | 6.06705447  | 1.77415114  | 2.83070321  |
| H | 7.09748354  | 1.43640011  | 0.81710606  |
| H | 8.46851866  | 0.17616001  | -0.82400006 |
| H | 7.47362156  | -1.68996513 | -2.12267116 |
| H | -0.00083400 | -4.23829632 | -0.87254707 |
| H | 3.85720129  | -2.77508721 | -1.76466114 |
| H | -3.03136723 | -4.60106735 | -1.17122509 |
| H | -1.86387414 | -4.37593034 | -2.49302319 |
| H | -2.13698116 | -3.06897123 | -1.30872210 |
| H | -1.68039513 | -6.80102352 | -0.54196304 |
| H | 0.03854600  | -6.65651548 | -0.12583201 |
| H | -0.49549904 | -6.44703649 | -1.80867414 |
| H | 4.43291134  | -1.32770010 | -3.72197728 |
| H | 4.43328134  | -3.05700924 | -4.14315332 |
| H | 5.96916043  | -2.19575817 | -3.91985030 |
| H | 6.67449449  | -3.97709730 | -2.08201216 |
| H | 5.13894539  | -4.80853137 | -2.39487018 |
| H | 5.56278141  | -4.31194233 | -0.74112306 |
| H | 1.47804111  | 6.77862149  | -1.31749410 |
| H | 1.68485813  | 7.62292056  | 1.00281208  |
| H | 0.62617205  | 6.39647048  | 2.88086822  |
| H | -0.19321901 | 3.55556827  | -2.27484318 |
| H | -3.30391925 | 0.58965204  | 1.62445712  |
| H | 2.21863617  | 5.33732740  | -2.86192322 |
| H | 1.59573912  | 3.99738531  | -3.85092630 |
| H | 2.21556417  | 3.66072928  | -2.23261317 |
| H | -1.64296013 | 5.62454343  | -2.76671321 |
| H | -0.66899205 | 5.11775939  | -4.16414632 |
| H | -0.17336101 | 6.51687651  | -3.19070124 |
| H | -5.30975039 | -1.18148309 | 3.12952724  |
| H | -3.80792829 | -0.48092804 | 3.75958729  |
| H | -3.73617229 | -1.70890813 | 2.48485119  |
| H | -5.11804739 | 2.34313218  | 1.60631412  |
| H | -4.66945536 | 1.87412314  | 3.25999125  |
| H | -6.17140245 | 1.25920110  | 2.53711019  |
| H | -6.71510752 | -1.04047508 | 1.37141810  |
| H | -7.70287861 | -1.81686314 | -0.76788106 |
| H | -6.49366452 | -1.48301811 | -2.90556922 |

|    |             |             |             |
|----|-------------|-------------|-------------|
| H  | -1.60146312 | 3.40011326  | 2.45889919  |
| H  | -3.03801223 | 0.04580800  | -3.12282824 |
| H  | 1.00755407  | 3.93769830  | 3.97520530  |
| H  | 0.63622305  | 2.52206319  | 2.94367123  |
| H  | -0.25621002 | 2.78141821  | 4.45472834  |
| H  | -2.12993316 | 4.51289635  | 4.56235235  |
| H  | -2.34708218 | 5.69698441  | 3.25280025  |
| H  | -0.91649607 | 5.77048946  | 4.30235233  |
| H  | -3.57301527 | -2.38897218 | -3.56684427 |
| H  | -3.37126126 | -1.42534011 | -5.04646639 |
| H  | -4.99262038 | -1.88524114 | -4.50630634 |
| H  | -4.73717136 | 1.82481114  | -3.64811028 |
| H  | -5.77066345 | 0.61194105  | -4.42854934 |
| H  | -4.18374232 | 1.00905908  | -5.12310739 |
| O  | 1.25051210  | 0.26068902  | 1.56755112  |
| O  | -0.11128301 | -0.30912402 | 1.80054314  |
| C  | -0.21422602 | -1.56435912 | -3.79936029 |
| H  | -1.09159108 | -1.95919015 | -3.29253525 |
| C  | 1.03876608  | -1.86307314 | -3.29255325 |
| H  | 1.15759709  | -2.47294519 | -2.40401018 |
| O  | 0.42181003  | -0.10067501 | -2.54130619 |
| O  | -0.72945706 | 2.08901916  | 0.74982606  |
| O  | 0.36610803  | -2.17373017 | -0.26231302 |
| Zr | 0.29473302  | 0.11083201  | -0.32958202 |
| H  | 1.93668015  | -1.54681512 | -3.81334829 |
| C  | -0.43169503 | -0.82751606 | -5.09665039 |
| H  | -0.81822606 | -1.49997712 | -5.87912844 |
| H  | -1.15374709 | -0.01325600 | -4.95959038 |
| H  | 0.50592804  | -0.38430803 | -5.44860544 |

## Spiro Bisperoxo Complex to Oxo Peroxo Complex (conformation 2 higher energy)

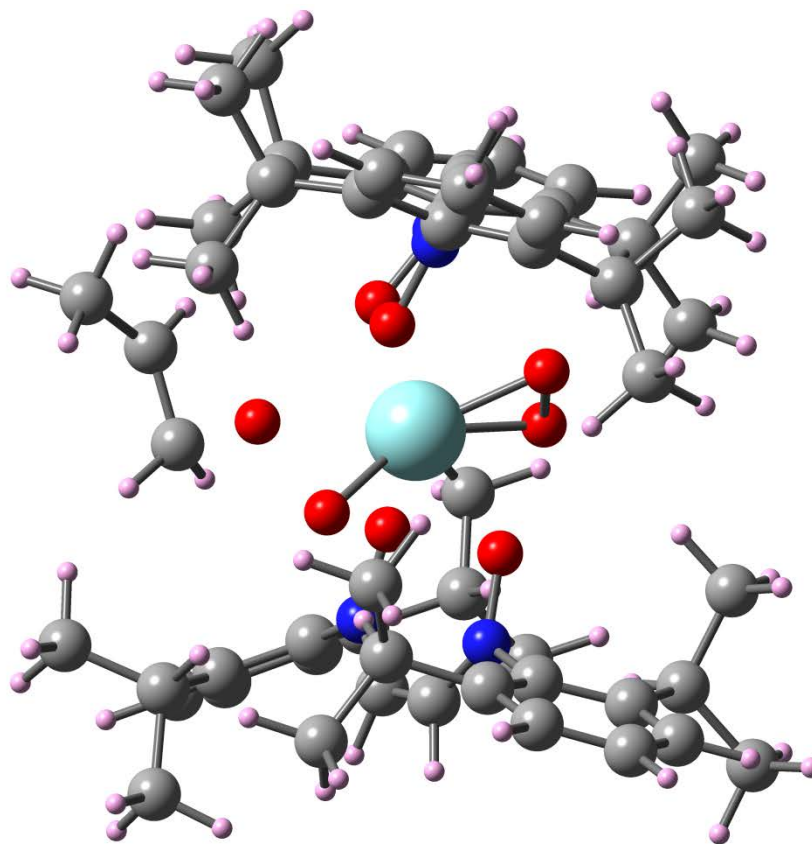

Fig. S154: ONCCNO Spiro Bisperoxo Complex to Oxo Peroxo Complex (conformation 2 higher energy)

| SCF            | $E_{ZP}$     | H            | G            | imag freq<br>( $\text{cm}^{-1}$ ) |
|----------------|--------------|--------------|--------------|-----------------------------------|
| -3009.59076062 | -3008.347175 | -3008.268853 | -3008.466679 | -344                              |

|   |             |             |             |
|---|-------------|-------------|-------------|
| O | -2.01904800 | 0.76749400  | -0.01565700 |
| O | 1.93092400  | -1.01934800 | -0.93701000 |
| O | 0.27692100  | 1.26128300  | -1.69168900 |
| N | -0.19424400 | -3.14082400 | 0.63170500  |
| N | 2.71336200  | -1.97535000 | -0.40664300 |
| N | 0.27506800  | 3.28012900  | 0.48908200  |
| N | -2.64076600 | 1.91331800  | -0.37078700 |
| C | 1.07986900  | -3.52797900 | 0.79154800  |
| C | 2.32429700  | -3.04450900 | 0.30789300  |
| C | -0.88281100 | 3.74662300  | -0.01028100 |
| C | -2.12677800 | 3.15538200  | -0.34488300 |
| C | -1.25561000 | -3.83060200 | 1.37429800  |
| C | -1.29249000 | -3.72510700 | 2.79265800  |
| C | -2.32225200 | -4.42613300 | 3.45846400  |
| C | -3.27063600 | -5.18231400 | 2.75638600  |

|   |             |             |             |
|---|-------------|-------------|-------------|
| C | -3.20415100 | -5.26670600 | 1.35759500  |
| C | -2.19454200 | -4.59932700 | 0.63539800  |
| C | -0.99741700 | -1.92195000 | 4.57328100  |
| C | -0.28647500 | -2.92248600 | 3.62849000  |
| C | 0.63218200  | -3.87792200 | 4.43907000  |
| C | 4.68336400  | 0.73514500  | 1.90486200  |
| C | 4.41939900  | -0.77593300 | 1.67711200  |
| C | 5.02383400  | -1.62049300 | 2.82956300  |
| C | 4.14199000  | -1.79191100 | -0.69214200 |
| C | 4.96035800  | -1.22784400 | 0.31614000  |
| C | 6.32922100  | -1.06615200 | 0.00811800  |
| C | 6.83661800  | -1.42443400 | -1.24987300 |
| C | 5.98435600  | -1.94546200 | -2.23806000 |
| C | 4.61129500  | -2.13914600 | -1.98313700 |
| C | -3.43779400 | -4.33209100 | -1.56761700 |
| C | -2.12086000 | -4.78212000 | -0.88402000 |
| C | -1.78513000 | -6.25352100 | -1.24795200 |
| C | 3.29987200  | -1.46965000 | -4.03397500 |
| C | 3.67289000  | -2.64156500 | -3.08367200 |
| C | 4.26077800  | -3.83796000 | -3.87153100 |
| C | 1.35780600  | 4.22297800  | 0.80032600  |
| C | 2.22613200  | 4.60486800  | -0.24810000 |
| C | 3.25627800  | 5.51333000  | 0.08065100  |
| C | 3.41512900  | 5.98048800  | 1.39457800  |
| C | 2.55567900  | 5.54275800  | 2.41722000  |
| C | 1.50319700  | 4.64459300  | 2.14480000  |
| C | 3.40864300  | 3.41907300  | -2.16525600 |
| C | 2.08616900  | 4.06119800  | -1.67439200 |
| C | 1.61839700  | 5.17292600  | -2.65050400 |
| C | -4.38438800 | -0.55192900 | 2.08003400  |
| C | -4.35140900 | 0.97707900  | 1.81909400  |
| C | -5.12354700 | 1.74763600  | 2.92131900  |
| C | -4.07714800 | 1.75282500  | -0.64812800 |
| C | -4.89315500 | 1.29297000  | 0.42012300  |
| C | -6.26960100 | 1.13447800  | 0.15753000  |
| C | -6.81005300 | 1.43646500  | -1.10159600 |
| C | -5.97821700 | 1.89821100  | -2.13171400 |
| C | -4.58899700 | 2.05913000  | -1.93778800 |
| C | 1.29941800  | 2.87593800  | 3.94160800  |
| C | 0.61328600  | 4.09722500  | 3.26530800  |
| C | 0.22960800  | 5.17155600  | 4.31100700  |
| C | -4.01250400 | 1.78655000  | -4.41784500 |
| C | -3.72752500 | 2.56299900  | -3.10544000 |
| C | -3.95413600 | 4.08124900  | -3.35061300 |
| H | 1.17746300  | -4.39597000 | 1.43335500  |
| H | 3.16605900  | -3.66227600 | 0.60168800  |
| H | -0.86898900 | 4.82308400  | -0.13796000 |
| H | -2.86549700 | 3.89359900  | -0.63439300 |
| H | -2.38289900 | -4.36719900 | 4.54139600  |
| H | -4.05531900 | -5.70700900 | 3.29652200  |
| H | -3.93497700 | -5.86603600 | 0.82133100  |
| H | 0.33343000  | -2.31142900 | 2.96901200  |

|   |             |             |             |
|---|-------------|-------------|-------------|
| H | 3.33228400  | -0.89998900 | 1.70452400  |
| H | -1.64749100 | -2.42316100 | 5.30421400  |
| H | -1.58176200 | -1.20877200 | 3.98506700  |
| H | -0.24379200 | -1.34742100 | 5.12682900  |
| H | 0.05725700  | -4.47059000 | 5.16410900  |
| H | 1.37754300  | -3.29468700 | 4.99526900  |
| H | 1.17077100  | -4.58338300 | 3.79053300  |
| H | 5.75736500  | 0.96411800  | 1.94403300  |
| H | 4.23157400  | 1.04870700  | 2.85406900  |
| H | 4.22951700  | 1.33463500  | 1.10734200  |
| H | 4.80575200  | -2.68987300 | 2.70441700  |
| H | 4.60030000  | -1.29910900 | 3.78967000  |
| H | 6.11506200  | -1.50608400 | 2.88524200  |
| H | 6.99521500  | -0.64330700 | 0.75562300  |
| H | 7.89372300  | -1.28724700 | -1.46600000 |
| H | 6.38846800  | -2.20128300 | -3.21339300 |
| H | -1.31849700 | -4.14998000 | -1.27349500 |
| H | 2.73863300  | -2.97914000 | -2.61904100 |
| H | -4.28938600 | -4.94345900 | -1.24201800 |
| H | -3.35621400 | -4.43042700 | -2.65822400 |
| H | -3.66280100 | -3.28503800 | -1.33256300 |
| H | -2.57049400 | -6.94125700 | -0.90795600 |
| H | -0.83953200 | -6.57173500 | -0.78999700 |
| H | -1.69069000 | -6.36229100 | -2.33675700 |
| H | 2.76857400  | -0.68625100 | -3.48399900 |
| H | 2.64283700  | -1.83059200 | -4.83646600 |
| H | 4.19938200  | -1.03946600 | -4.49568400 |
| H | 5.14140200  | -3.54737500 | -4.45897500 |
| H | 3.51249100  | -4.22282900 | -4.57686800 |
| H | 4.55492000  | -4.65804800 | -3.20329800 |
| H | 3.94409800  | 5.84156600  | -0.69387100 |
| H | 4.21780300  | 6.67682600  | 1.62693600  |
| H | 2.70628200  | 5.89853900  | 3.43216400  |
| H | 1.33868800  | 3.25899700  | -1.69184400 |
| H | -3.30173500 | 1.27736400  | 1.87485200  |
| H | 4.22173100  | 4.15396600  | -2.24553700 |
| H | 3.25342200  | 2.97266300  | -3.15527300 |
| H | 3.72887400  | 2.61924200  | -1.48742900 |
| H | 0.65479400  | 5.60090800  | -2.34204500 |
| H | 1.49613300  | 4.75747700  | -3.65907700 |
| H | 2.34715700  | 5.99349300  | -2.70640100 |
| H | -5.41001100 | -0.94376600 | 2.03165700  |
| H | -3.98042600 | -0.77224200 | 3.07610800  |
| H | -3.76894900 | -1.07998900 | 1.34471500  |
| H | -5.11161300 | 2.83067300  | 2.74040200  |
| H | -4.65696500 | 1.56000500  | 3.89701700  |
| H | -6.17180000 | 1.42822400  | 2.98967400  |
| H | -6.92291800 | 0.78250900  | 0.95087700  |
| H | -7.87556200 | 1.31265700  | -1.27984200 |
| H | -6.40852300 | 2.12452400  | -3.10313100 |
| H | -0.31828500 | 3.72536700  | 2.82019900  |
| H | -2.67038200 | 2.41326500  | -2.85892000 |



|    |             |             |             |
|----|-------------|-------------|-------------|
| H  | 2.27187900  | 3.16349000  | 4.36576800  |
| H  | 1.44448700  | 2.06324000  | 3.22279400  |
| H  | 0.66760200  | 2.49638200  | 4.75546900  |
| H  | -0.49022400 | 4.75085000  | 5.02493000  |
| H  | -0.22763800 | 6.05261100  | 3.84138200  |
| H  | 1.10018900  | 5.50809800  | 4.88915900  |
| H  | -3.94168700 | 0.70347400  | -4.27207400 |
| H  | -3.28554500 | 2.07789100  | -5.18704100 |
| H  | -5.01266000 | 2.01002900  | -4.81001200 |
| H  | -3.72867400 | 4.68612500  | -2.46308900 |
| H  | -4.99797300 | 4.27911500  | -3.62751200 |
| H  | -3.31256800 | 4.43304700  | -4.16894000 |
| O  | 1.11212600  | -0.54925700 | 1.59512400  |
| O  | -0.33192500 | -0.22480900 | 1.95454800  |
| C  | -1.56377200 | -0.41753700 | -3.19430100 |
| H  | -2.41342600 | -0.16776600 | -2.55398500 |
| C  | -1.38196500 | -1.83174200 | -3.49055900 |
| H  | -1.74684100 | -2.54916200 | -2.76406600 |
| O  | -0.27277200 | -0.31342100 | -2.38910200 |
| H  | -1.46866700 | 0.26479000  | -4.04395800 |
| C  | -0.57280900 | -2.31923500 | -4.65646600 |
| H  | 0.20784200  | -3.02913700 | -4.34560600 |
| H  | -1.20835800 | -2.85258200 | -5.38703700 |
| H  | -0.08598200 | -1.48642900 | -5.17659600 |
| O  | 0.56228700  | 2.01368100  | 0.75720900  |
| O  | -0.58071500 | -2.18260100 | -0.25366600 |
| Zr | 0.06887700  | -0.02930900 | -0.13193300 |

### Butterfly Bisperoxo Complex to Oxo Peroxo Complex

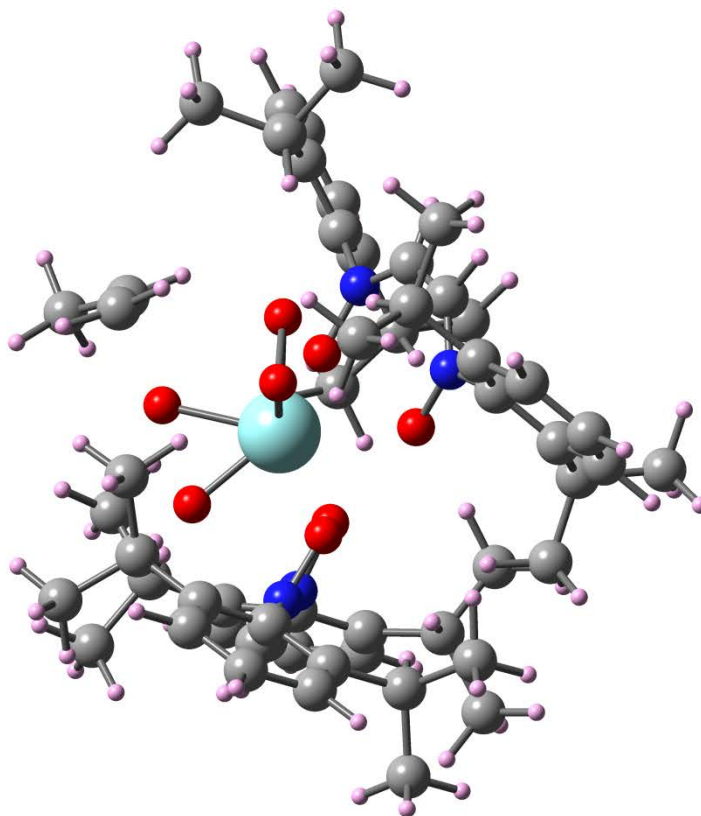

Fig. S155: ONCCNO Butterfly Bisperoxo Complex to Oxo Peroxo Complex

| SCF            | E <sub>ZP</sub> | H            | G            | imag freq<br>(cm <sup>-1</sup> ) |
|----------------|-----------------|--------------|--------------|----------------------------------|
| -3009.60946146 | -3008.364592    | -3008.286566 | -3008.481065 | -482                             |

|   |             |             |             |
|---|-------------|-------------|-------------|
| O | 0.20432700  | -1.01548600 | 1.26943500  |
| O | 2.15433700  | 0.16372500  | -0.30337200 |
| O | 0.76201600  | -1.88292600 | -1.63845400 |
| N | 0.34728500  | 2.85773300  | 0.34949100  |
| N | 2.91198500  | 1.14223100  | -0.81670500 |
| N | -2.83822700 | -1.50575100 | 0.46969100  |
| N | 0.16404600  | -2.35019600 | 1.45622700  |
| C | 1.47851000  | 3.16625500  | -0.28215200 |
| C | 2.57960600  | 2.42805200  | -0.83072500 |
| C | -2.28672000 | -2.60793100 | 0.98515200  |
| C | -0.96309100 | -3.03620400 | 1.31704500  |
| C | -0.52422700 | 3.96026100  | 0.79197700  |
| C | -1.25022100 | 4.68080500  | -0.18813600 |
| C | -2.04886000 | 5.75008600  | 0.27445700  |
| C | -2.13613100 | 6.05640100  | 1.64070300  |
| C | -1.42980200 | 5.29297400  | 2.58450300  |

|   |             |             |             |
|---|-------------|-------------|-------------|
| C | -0.60438300 | 4.22338900  | 2.18099500  |
| C | -2.64153900 | 4.15838300  | -2.24949200 |
| C | -1.21133900 | 4.34013200  | -1.68327900 |
| C | -0.45402500 | 5.43388600  | -2.48356200 |
| C | 2.73149000  | -0.80739700 | -4.33592400 |
| C | 3.09259600  | 0.57337200  | -3.72597400 |
| C | 3.37279100  | 1.61821200  | -4.83745800 |
| C | 4.20472000  | 0.71685000  | -1.38401300 |
| C | 4.28394200  | 0.44914500  | -2.77211700 |
| C | 5.54323000  | 0.03942600  | -3.26507100 |
| C | 6.64977900  | -0.10213700 | -2.41513500 |
| C | 6.52443700  | 0.15441700  | -1.03988400 |
| C | 5.29246300  | 0.56216500  | -0.48981400 |
| C | -0.87770700 | 2.53765500  | 4.04243200  |
| C | 0.13504600  | 3.38628100  | 3.22856100  |
| C | 1.00969200  | 4.26218800  | 4.16158900  |
| C | 5.63413800  | -0.38453200 | 1.85136500  |
| C | 5.17469500  | 0.83515600  | 1.01309200  |
| C | 5.96775900  | 2.10975700  | 1.40896600  |
| C | -4.30575700 | -1.47885500 | 0.31279700  |
| C | -4.93004000 | -2.39568200 | -0.57718300 |
| C | -6.33495700 | -2.30995800 | -0.69086600 |
| C | -7.07095900 | -1.35638000 | 0.02727600  |
| C | -6.41733500 | -0.46242500 | 0.88918200  |
| C | -5.01822900 | -0.50375300 | 1.05771600  |
| C | -4.60405100 | -3.48164200 | -2.88172300 |
| C | -4.17868400 | -3.46346500 | -1.39074700 |
| C | -4.40551400 | -4.87712600 | -0.78214500 |
| C | 2.13349300  | -0.10310400 | 3.79733000  |
| C | 1.29877000  | -1.39820800 | 3.98192200  |
| C | 1.14418500  | -1.75664200 | 5.48151200  |
| C | 1.38926800  | -3.00347400 | 1.93524600  |
| C | 1.92285100  | -2.53827700 | 3.16882000  |
| C | 3.09038800  | -3.16653700 | 3.64443600  |
| C | 3.69095600  | -4.21748300 | 2.93351100  |
| C | 3.13602100  | -4.65379000 | 1.72341500  |
| C | 1.97534600  | -4.05596700 | 1.18298300  |
| C | -4.32752400 | 1.90826400  | 1.38346200  |
| C | -4.33806200 | 0.48782600  | 2.00835400  |
| C | -4.99975300 | 0.49701400  | 3.40997700  |
| C | 2.53989200  | -4.52655100 | -1.25298500 |
| C | 1.44068700  | -4.56432000 | -0.16193200 |
| C | 0.86184500  | -5.99824500 | -0.01869300 |
| H | 1.60104500  | 4.23764500  | -0.39753900 |
| H | 3.31592400  | 3.05593800  | -1.32042800 |
| H | -3.02993800 | -3.36745200 | 1.19505800  |
| H | -0.88749100 | -4.08681800 | 1.56955700  |
| H | -2.61712600 | 6.33543800  | -0.44297200 |
| H | -2.76103500 | 6.88285900  | 1.97122900  |
| H | -1.51626100 | 5.53166400  | 3.64116200  |
| H | -0.69241100 | 3.38608200  | -1.83736000 |
| H | 2.20518500  | 0.90895000  | -3.17766500 |

|   |             |             |             |
|---|-------------|-------------|-------------|
| H | -3.21756900 | 5.09393600  | -2.23098900 |
| H | -3.19156600 | 3.40014500  | -1.67982700 |
| H | -2.57809500 | 3.81634200  | -3.28863200 |
| H | -0.95007500 | 6.41082000  | -2.39825400 |
| H | -0.41883900 | 5.15917700  | -3.54515700 |
| H | 0.58102500  | 5.55450200  | -2.13568000 |
| H | 3.57188000  | -1.24150200 | -4.89687700 |
| H | 1.88503100  | -0.69002400 | -5.02496600 |
| H | 2.41943800  | -1.50849400 | -3.55374700 |
| H | 3.61400600  | 2.60354600  | -4.41481300 |
| H | 2.47979400  | 1.73109600  | -5.46479500 |
| H | 4.20679000  | 1.31715300  | -5.48701300 |
| H | 5.64909200  | -0.17535400 | -4.32484500 |
| H | 7.60780400  | -0.41865600 | -2.82124900 |
| H | 7.38611100  | 0.03078800  | -0.38922000 |
| H | 0.79650000  | 2.68074000  | 2.71581400  |
| H | 4.12050500  | 1.00502300  | 1.25759500  |
| H | -1.59507000 | 3.17758500  | 4.57374000  |
| H | -0.35162200 | 1.92726200  | 4.78828400  |
| H | -1.43053100 | 1.86600500  | 3.37636200  |
| H | 0.40151500  | 4.94746900  | 4.76643300  |
| H | 1.72604400  | 4.86552100  | 3.58887500  |
| H | 1.57687000  | 3.62493900  | 4.85284800  |
| H | 5.05025000  | -1.27647000 | 1.59782900  |
| H | 5.49604500  | -0.17837200 | 2.92099000  |
| H | 6.69621800  | -0.61037700 | 1.68967900  |
| H | 7.03975400  | 1.98855100  | 1.20479100  |
| H | 5.84925700  | 2.31619600  | 2.48106200  |
| H | 5.61925100  | 2.98891200  | 0.85098100  |
| H | -6.85361400 | -2.98902000 | -1.36120600 |
| H | -8.15126700 | -1.30867600 | -0.08681200 |
| H | -6.99779100 | 0.27084500  | 1.44179300  |
| H | -3.10430500 | -3.24705200 | -1.37179400 |
| H | 0.30101600  | -1.18415400 | 3.58756100  |
| H | -5.64787600 | -3.79828300 | -3.00682700 |
| H | -3.97452000 | -4.19370500 | -3.43050700 |
| H | -4.47994500 | -2.49959500 | -3.34771600 |
| H | -4.10821900 | -4.93823500 | 0.27316200  |
| H | -3.82441600 | -5.62286400 | -1.33938100 |
| H | -5.46495900 | -5.15990000 | -0.83921000 |
| H | 3.16500900  | -0.24647500 | 4.14767400  |
| H | 1.68949300  | 0.71953800  | 4.37346300  |
| H | 2.15115200  | 0.17741600  | 2.73924400  |
| H | 0.57457500  | -2.68535400 | 5.61676700  |
| H | 0.61013900  | -0.95025500 | 6.00186500  |
| H | 2.11428400  | -1.88051900 | 5.97960400  |
| H | 3.52723700  | -2.83763900 | 4.58308700  |
| H | 4.58954500  | -4.69182500 | 3.32120600  |
| H | 3.61547000  | -5.45962300 | 1.17523500  |
| H | -3.29132900 | 0.19566900  | 2.13707900  |
| H | 0.65439200  | -3.89738100 | -0.52162100 |
| H | -5.34899500 | 2.27373100  | 1.20930200  |

|    |             |             |             |
|----|-------------|-------------|-------------|
| H  | -3.78853200 | 1.89796500  | 0.43086500  |
| H  | -3.82135400 | 2.61540700  | 2.05305000  |
| H  | -4.43191900 | 1.15335600  | 4.08240700  |
| H  | -5.02212500 | -0.50775500 | 3.85201600  |
| H  | -6.03002200 | 0.87424900  | 3.37597000  |
| H  | 2.92445100  | -3.50842300 | -1.36378500 |
| H  | 2.10469700  | -4.81883500 | -2.21667200 |
| H  | 3.37352700  | -5.20870800 | -1.03350600 |
| H  | 0.05053500  | -6.04718600 | 0.72212700  |
| H  | 1.63381700  | -6.71526200 | 0.29289400  |
| H  | 0.45829300  | -6.33389800 | -0.98264800 |
| O  | 0.38253100  | 1.35934800  | -2.09813000 |
| O  | -1.18175200 | 0.53852600  | -2.71496100 |
| O  | -0.73458200 | -2.16157700 | -1.44418100 |
| O  | -2.22713000 | -0.37887500 | 0.06733700  |
| O  | -0.12631700 | 1.62949300  | 0.60723100  |
| Zr | -0.11998500 | -0.15304700 | -0.92613900 |
| C  | -3.16944600 | -0.13464200 | -3.32035700 |
| H  | -3.57052300 | -0.49106100 | -2.37524900 |
| C  | -2.02615200 | -0.73735200 | -3.83097500 |
| H  | -1.62062300 | -1.64413600 | -3.39045700 |
| H  | -1.64396900 | -0.43776200 | -4.80408600 |
| C  | -3.89531900 | 1.00091600  | -3.99014200 |
| H  | -3.32341000 | 1.38679700  | -4.84201000 |
| H  | -4.88244600 | 0.67367700  | -4.35689400 |
| H  | -4.06943800 | 1.82697500  | -3.29058000 |

## Oxo Peroxo Complex to Peroxo Ozone Complex

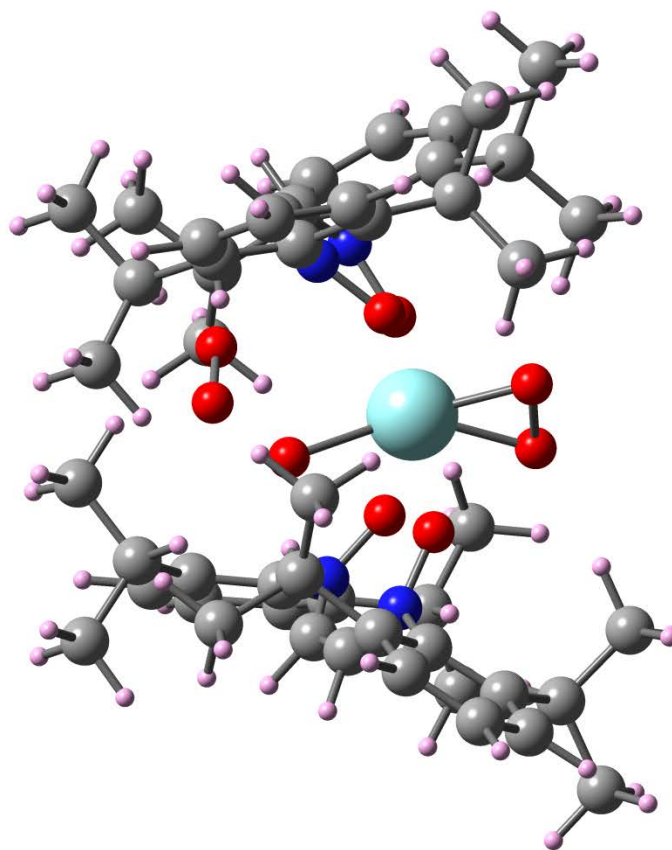

Fig. S156: ONCCNO Oxo Peroxo Complex to Peroxo Ozone Complex

| SCF          | E <sub>ZP</sub> | H            | G            | imag freq<br>(cm <sup>-1</sup> ) |
|--------------|-----------------|--------------|--------------|----------------------------------|
| -2966.876852 | -2965.711364    | -2965.637093 | -2965.824359 | -81                              |
| O            | -0.60604431     | -2.10513737  | -0.48409152  |                                  |
| O            | 0.59925550      | 2.07374192   | -0.61981428  |                                  |
| O            | 0.75653559      | -0.16932605  | 1.09013928   |                                  |
| N            | -2.65197778     | 1.68027701   | -0.48519318  |                                  |
| N            | 0.27432904      | 2.98025449   | 0.34254363   |                                  |
| N            | 2.71637943      | -2.04135510  | -0.27256732  |                                  |
| N            | -0.34459488     | -2.94478878  | 0.52969296   |                                  |
| C            | -2.24047483     | 2.63790686   | 0.35156982   |                                  |
| C            | -0.98552434     | 3.18504256   | 0.74895071   |                                  |
| C            | 2.19756109      | -2.95460376  | 0.55659629   |                                  |
| C            | 0.87156942      | -3.31066424  | 0.93877396   |                                  |
| C            | -4.05632841     | 1.56494185   | -0.87302867  |                                  |
| C            | -4.40181923     | 1.97157682   | -2.18803172  |                                  |
| C            | -5.75652929     | 1.85841968   | -2.56152987  |                                  |
| C            | -6.71667230     | 1.36830360   | -1.66121029  |                                  |
| C            | -6.33683379     | 0.95938424   | -0.37424236  |                                  |
| C            | -4.99106017     | 1.03019152   | 0.04752463   |                                  |
| C            | -3.04965880     | 1.37577695   | -4.24444996  |                                  |

|   |             |             |             |
|---|-------------|-------------|-------------|
| C | -3.36106157 | 2.47539021  | -3.19257602 |
| C | -3.79538725 | 3.79585637  | -3.87680556 |
| C | 2.64605661  | 3.68450891  | -2.63933261 |
| C | 1.62087295  | 4.49266214  | -1.80140933 |
| C | 1.41029770  | 5.91097237  | -2.39477720 |
| C | 1.36824591  | 3.87846810  | 0.72698404  |
| C | 2.04386821  | 4.55861582  | -0.32740912 |
| C | 3.14521540  | 5.36533051  | 0.02347789  |
| C | 3.53949750  | 5.52369146  | 1.36022115  |
| C | 2.82446545  | 4.88046553  | 2.37866713  |
| C | 1.72652818  | 4.03902531  | 2.09411573  |
| C | -5.03121058 | -0.94837212 | 1.63958673  |
| C | -4.60198790 | 0.52780504  | 1.44106108  |
| C | -5.20678131 | 1.42658284  | 2.55251264  |
| C | 1.94951921  | 2.51875573  | 4.13182860  |
| C | 0.99434526  | 3.38443297  | 3.27245068  |
| C | 0.29018618  | 4.45874089  | 4.14534561  |
| C | 4.17209779  | -2.04691757 | -0.51163303 |
| C | 4.98125234  | -1.25366380 | 0.33159837  |
| C | 6.37120242  | -1.28520802 | 0.08498895  |
| C | 6.89998120  | -2.04603695 | -0.96888574 |
| C | 6.05235334  | -2.78197675 | -1.81445623 |
| C | 4.65696989  | -2.79706511 | -1.61097208 |
| C | 4.72872885  | 1.12992131  | 1.13666770  |
| C | 4.40651957  | -0.35874446 | 1.43414919  |
| C | 4.92933435  | -0.77266889 | 2.83419883  |
| C | -3.05459571 | -3.77389080 | -2.06895064 |
| C | -2.06427832 | -4.59028959 | -1.19566344 |
| C | -2.10044463 | -6.09404547 | -1.57088686 |
| C | -1.52698799 | -3.57239881 | 1.13935185  |
| C | -2.35127648 | -4.36224190 | 0.29335574  |
| C | -3.48262189 | -4.96009081 | 0.88432470  |
| C | -3.76472120 | -4.79141811 | 2.24898995  |
| C | -2.92531479 | -4.00765957 | 3.05261390  |
| C | -1.78706316 | -3.36386454 | 2.52019038  |
| C | 3.41338638  | -2.58937484 | -3.80131782 |
| C | 3.72136039  | -3.51528065 | -2.58912571 |
| C | 4.27305627  | -4.88267703 | -3.05901755 |
| C | -1.74880495 | -1.43771145 | 4.20319649  |
| C | -0.91491728 | -2.50271372 | 3.44622542  |
| C | -0.14302653 | -3.39769773 | 4.45601225  |
| H | -3.07980715 | 3.18155479  | 0.77568540  |
| H | -1.08013857 | 3.98897625  | 1.46826982  |
| H | 2.96234931  | -3.56162053 | 1.02722242  |
| H | 0.84098069  | -4.07672651 | 1.70413589  |
| H | -6.06147747 | 2.15890667  | -3.56000204 |
| H | -7.75822621 | 1.29741794  | -1.96623380 |
| H | -7.08747325 | 0.56648962  | 0.30646282  |
| H | -2.42398594 | 2.67294049  | -2.66084013 |
| H | 0.67058257  | 3.95888132  | -1.87722142 |
| H | -3.95116288 | 1.10814073  | -4.81329696 |
| H | -2.65458977 | 0.47639943  | -3.76166503 |

|   |             |             |             |
|---|-------------|-------------|-------------|
| H | -2.28922973 | 1.73388827  | -4.94970495 |
| H | -4.68426439 | 3.65705847  | -4.50597570 |
| H | -2.98803544 | 4.15924438  | -4.52550351 |
| H | -4.02183408 | 4.57822654  | -3.14022068 |
| H | 3.64810891  | 4.13316639  | -2.58437727 |
| H | 2.33760447  | 3.66151930  | -3.69229497 |
| H | 2.69631367  | 2.64979790  | -2.28763439 |
| H | 0.69283663  | 6.49457105  | -1.80236813 |
| H | 1.02039770  | 5.82621616  | -3.41768450 |
| H | 2.34702554  | 6.48113238  | -2.44690229 |
| H | 3.68849130  | 5.88607976  | -0.75989929 |
| H | 4.39168222  | 6.15281775  | 1.60628421  |
| H | 3.12537118  | 5.02141842  | 3.41333295  |
| H | -3.51244294 | 0.55658795  | 1.54316509  |
| H | 0.23337939  | 2.70174951  | 2.89666946  |
| H | -6.12265459 | -1.06534143 | 1.60254911  |
| H | -4.68760703 | -1.30979013 | 2.61663767  |
| H | -4.59166163 | -1.59269622 | 0.86902192  |
| H | -6.30476618 | 1.40887590  | 2.52811341  |
| H | -4.88803021 | 2.47229570  | 2.44742931  |
| H | -4.88283397 | 1.07440249  | 3.54027544  |
| H | 2.38957171  | 1.72047731  | 3.52434942  |
| H | 1.38806044  | 2.04638372  | 4.94824049  |
| H | 2.75908858  | 3.11255594  | 4.57660148  |
| H | 1.01430747  | 5.14681177  | 4.60145899  |
| H | -0.27317882 | 3.97575554  | 4.95446988  |
| H | -0.41312818 | 5.06599614  | 3.55807926  |
| H | 7.03694418  | -0.69873606 | 0.71232821  |
| H | 7.97326675  | -2.05359653 | -1.14390005 |
| H | 6.47710169  | -3.34263618 | -2.64149166 |
| H | 3.31412860  | -0.44501235 | 1.44405633  |
| H | -1.06317603 | -4.21582107 | -1.42917790 |
| H | 5.81105836  | 1.31729552  | 1.13990239  |
| H | 4.27005870  | 1.77443837  | 1.89611763  |
| H | 4.32976035  | 1.42811710  | 0.16052103  |
| H | 4.67973215  | -1.81695603 | 3.06586478  |
| H | 4.47678914  | -0.13699066 | 3.60605707  |
| H | 6.01980682  | -0.66443074 | 2.90689085  |
| H | -4.09234467 | -4.08826779 | -1.89129990 |
| H | -2.82874299 | -3.92256240 | -3.13254269 |
| H | -2.96793628 | -2.70474415 | -1.85137468 |
| H | -1.41211222 | -6.68286936 | -0.95019936 |
| H | -1.80490325 | -6.21817717 | -2.62065282 |
| H | -3.10506442 | -6.52210113 | -1.46056356 |
| H | -4.14010944 | -5.57177589 | 0.27348049  |
| H | -4.63967373 | -5.26842662 | 2.68409660  |
| H | -3.16109281 | -3.87998428 | 4.10503018  |
| H | 2.76356677  | -3.70546540 | -2.08805949 |
| H | -0.18678196 | -1.94448756 | 2.85008423  |
| H | 4.33973493  | -2.31815172 | -4.32613742 |
| H | 2.90183214  | -1.67562822 | -3.48323465 |
| H | 2.75462743  | -3.10790740 | -4.50969305 |



|    |             |             |             |
|----|-------------|-------------|-------------|
| H  | 3.51596282  | -5.39575079 | -3.66544488 |
| H  | 4.53377916  | -5.53243008 | -2.21291862 |
| H  | 5.16562095  | -4.76692164 | -3.68719669 |
| H  | -2.20281283 | -0.73536178 | 3.49779722  |
| H  | -1.08646065 | -0.85586088 | 4.85651736  |
| H  | -2.52845025 | -1.89065663 | 4.83000023  |
| H  | 0.47348727  | -4.15845762 | 3.95664786  |
| H  | -0.83564076 | -3.92552648 | 5.12499491  |
| H  | 0.51924712  | -2.77924859 | 5.07503556  |
| O  | 0.72232019  | 0.55788892  | -2.83915696 |
| O  | 0.16067001  | -0.86429780 | -2.87538532 |
| O  | 0.10283074  | 0.63061918  | 2.15864740  |
| O  | -1.27139573 | 0.88792523  | 1.89060488  |
| O  | 2.06949566  | -1.11984125 | -0.96514665 |
| O  | -1.85292853 | 0.71692494  | -1.03097415 |
| Zr | 0.09524437  | -0.03092805 | -0.97867477 |

Peroxo  $\eta^2$ -Ozone Complex to Peroxo  $\eta^3$ -Ozone Complex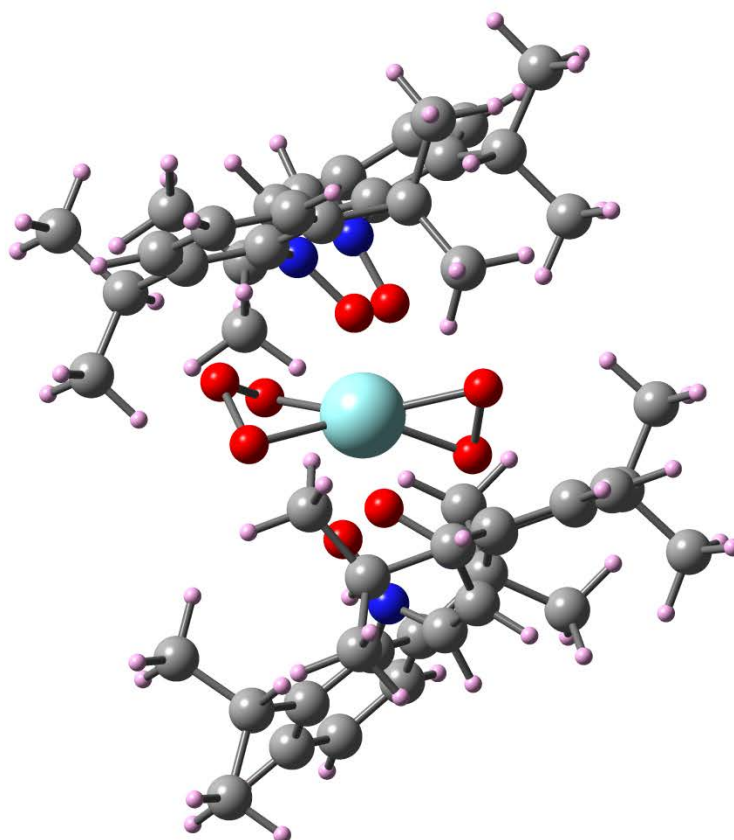Fig. S157: ONCCNO Peroxo  $\eta^2$ -Ozone Complex to Peroxo  $\eta^3$ -Ozone Complex

| SCF          | $E_{ZP}$     | H            | G            | imag freq<br>( $\text{cm}^{-1}$ ) |
|--------------|--------------|--------------|--------------|-----------------------------------|
| -2966.884976 | -2965.719613 | -2965.645439 | -2965.834506 | -146                              |

|   |             |             |             |
|---|-------------|-------------|-------------|
| O | -2.07389739 | 0.03488687  | -0.08219090 |
| O | 2.39010619  | -0.38438319 | -0.83761953 |
| O | 0.66835640  | 1.57744231  | -1.70523912 |
| N | 0.91923713  | -2.91134561 | 0.84609514  |
| N | 3.36629752  | -1.08199795 | -0.26708966 |
| N | -1.18081126 | 3.14995517  | 0.23191196  |
| N | -2.97770599 | 0.65477208  | -0.86741873 |
| C | 2.21451645  | -2.88446054 | 1.12612942  |
| C | 3.29033677  | -2.12936610 | 0.55936646  |
| C | -2.29054580 | 3.06410433  | -0.52198710 |
| C | -3.05628129 | 1.97659431  | -1.03322267 |
| C | 0.00502836  | -3.81124792 | 1.55819916  |
| C | -0.17603013 | -3.66848759 | 2.96013392  |
| C | -1.07790659 | -4.56507938 | 3.57430883  |
| C | -1.77120973 | -5.53147518 | 2.83276405  |
| C | -1.57021390 | -5.63724067 | 1.44763266  |

|   |             |             |             |
|---|-------------|-------------|-------------|
| C | -0.67206144 | -4.78596636 | 0.77414434  |
| C | -0.47741443 | -1.78289758 | 4.65162071  |
| C | 0.53354431  | -2.62104901 | 3.82963276  |
| C | 1.56971710  | -3.30283766 | 4.76533861  |
| C | 4.40917239  | 2.38142405  | 1.38949542  |
| C | 4.66908021  | 0.85643219  | 1.51402987  |
| C | 5.50643308  | 0.53746887  | 2.77917205  |
| C | 4.71017524  | -0.59008227 | -0.63353410 |
| C | 5.33833792  | 0.32490507  | 0.24177204  |
| C | 6.62000918  | 0.78049763  | -0.13703900 |
| C | 7.21202247  | 0.35839883  | -1.33760458 |
| C | 6.53171517  | -0.51872357 | -2.19946051 |
| C | 5.25262136  | -1.01310600 | -1.86988468 |
| C | -1.69230057 | -4.41541385 | -1.51716266 |
| C | -0.46362045 | -4.95373148 | -0.73639637 |
| C | -0.15860000 | -6.42485623 | -1.11889358 |
| C | 3.80276090  | -1.00585942 | -3.93665137 |
| C | 4.46856905  | -1.89369028 | -2.84744179 |
| C | 5.33703662  | -3.00539951 | -3.48418621 |
| C | -0.76800691 | 4.47796251  | 0.72671673  |
| C | -0.00977995 | 5.30974938  | -0.12907631 |
| C | 0.35876761  | 6.57362526  | 0.38257938  |
| C | 0.00968889  | 6.95702212  | 1.68626965  |
| C | -0.71181773 | 6.08323919  | 2.51736184  |
| C | -1.11984294 | 4.81442374  | 2.05743460  |
| C | 1.95404839  | 5.00350658  | -1.71728748 |
| C | 0.41873802  | 4.88709296  | -1.53801422 |
| C | -0.32473051 | 5.71497739  | -2.61955299 |
| C | -4.20856575 | -1.88955717 | 1.75456808  |
| C | -4.76798328 | -0.61813919 | 1.06319999  |
| C | -6.11729974 | -0.18689906 | 1.69379459  |
| C | -4.03423385 | -0.22092927 | -1.40045821 |
| C | -4.88869459 | -0.84022697 | -0.44891064 |
| C | -5.88821663 | -1.69838655 | -0.94822565 |
| C | -6.03266149 | -1.91966007 | -2.32731553 |
| C | -5.17463369 | -1.28623571 | -3.23623725 |
| C | -4.14503522 | -0.42300491 | -2.79910641 |
| C | -0.82170272 | 3.09177043  | 3.88704267  |
| C | -1.84728878 | 3.83675638  | 2.98668026  |
| C | -2.94232704 | 4.52407838  | 3.83885921  |
| C | -2.47069735 | -0.85536206 | -4.66428494 |
| C | -3.22356148 | 0.22140866  | -3.84062570 |
| C | -4.01836566 | 1.18079900  | -4.76632247 |
| H | 2.52071403  | -3.59134213 | 1.88818490  |
| H | 4.26969962  | -2.46282300 | 0.88472188  |
| H | -2.70880184 | 4.03737599  | -0.74942188 |
| H | -3.90217919 | 2.28252877  | -1.63806765 |
| H | -1.24803115 | -4.48960095 | 4.64433888  |
| H | -2.46743640 | -6.20106485 | 3.33239828  |
| H | -2.10815403 | -6.39377760 | 0.88380131  |
| H | 1.04957050  | -1.90175097 | 3.18939049  |
| H | 3.68644263  | 0.38948541  | 1.63894551  |

|   |             |             |             |
|---|-------------|-------------|-------------|
| H | -1.07100972 | -2.39836895 | 5.34135301  |
| H | -1.14211040 | -1.24107532 | 3.97279113  |
| H | 0.06651121  | -1.03777606 | 5.24673614  |
| H | 1.07907086  | -3.98384711 | 5.47382777  |
| H | 2.10780303  | -2.54231029 | 5.34601771  |
| H | 2.31204911  | -3.89150203 | 4.20697313  |
| H | 5.34718227  | 2.94660864  | 1.30272232  |
| H | 3.87187167  | 2.74008994  | 2.27616984  |
| H | 3.79139523  | 2.59840694  | 0.51036330  |
| H | 5.67497905  | -0.54220475 | 2.89075126  |
| H | 4.97962248  | 0.89271373  | 3.67384639  |
| H | 6.48834676  | 1.02850064  | 2.75036757  |
| H | 7.14720059  | 1.48019885  | 0.50595282  |
| H | 8.19873653  | 0.72496431  | -1.61095568 |
| H | 6.99387905  | -0.81513107 | -3.13646773 |
| H | 0.39100382  | -4.34708823 | -1.05002754 |
| H | 3.65257148  | -2.38580516 | -2.30398153 |
| H | -2.60636886 | -4.96090215 | -1.24412199 |
| H | -1.53304155 | -4.53398501 | -2.59697540 |
| H | -1.83967231 | -3.35068969 | -1.31192565 |
| H | -1.01381338 | -7.08636918 | -0.92908032 |
| H | 0.70206819  | -6.81785321 | -0.56141109 |
| H | 0.07122825  | -6.48625979 | -2.19065547 |
| H | 3.12053257  | -0.27997129 | -3.48265228 |
| H | 3.22212251  | -1.63123176 | -4.62703497 |
| H | 4.56333150  | -0.46579710 | -4.51751664 |
| H | 6.11326984  | -2.59078379 | -4.14019205 |
| H | 4.70683455  | -3.65989413 | -4.09996785 |
| H | 5.83119398  | -3.62277674 | -2.72228044 |
| H | 0.93507567  | 7.25154826  | -0.24109847 |
| H | 0.30846956  | 7.93335547  | 2.06090658  |
| H | -0.95888986 | 6.38910952  | 3.52973482  |
| H | 0.18260449  | 3.82879556  | -1.68962034 |
| H | -4.04469036 | 0.18115550  | 1.25163785  |
| H | 2.30087424  | 6.04424481  | -1.65606102 |
| H | 2.23868832  | 4.60523452  | -2.69865690 |
| H | 2.48001128  | 4.41690601  | -0.95477797 |
| H | -1.41459199 | 5.59896004  | -2.54230186 |
| H | -0.02102932 | 5.38136458  | -3.61995923 |
| H | -0.09584520 | 6.78613073  | -2.53394460 |
| H | -4.87682944 | -2.74898024 | 1.60616621  |
| H | -4.10664082 | -1.71920130 | 2.83438697  |
| H | -3.22075701 | -2.13972767 | 1.35510391  |
| H | -6.52208732 | 0.71056757  | 1.20749681  |
| H | -5.97386858 | 0.03666977  | 2.75916447  |
| H | -6.87471061 | -0.97832718 | 1.62337845  |
| H | -6.56123124 | -2.19172521 | -0.25240391 |
| H | -6.81195220 | -2.58540877 | -2.69083375 |
| H | -5.29128967 | -1.46972070 | -4.30070337 |
| H | -2.34186022 | 3.07153590  | 2.37552290  |
| H | -2.44914509 | 0.80159711  | -3.33436177 |
| H | -0.24151053 | 3.80599035  | 4.48770630  |

|    |             |             |             |
|----|-------------|-------------|-------------|
| H  | -0.13702612 | 2.49023409  | 3.28136899  |
| H  | -1.34804317 | 2.41376616  | 4.57182717  |
| H  | -3.50523018 | 3.76551557  | 4.39782204  |
| H  | -3.65014249 | 5.08659388  | 3.21578539  |
| H  | -2.51278828 | 5.21638891  | 4.57436022  |
| H  | -1.82223802 | -1.44291516 | -4.00652901 |
| H  | -1.82906861 | -0.36560918 | -5.40805919 |
| H  | -3.16103841 | -1.52452320 | -5.19615381 |
| H  | -4.54159476 | 1.96219019  | -4.19664007 |
| H  | -4.77163315 | 0.64118166  | -5.35592904 |
| H  | -3.33305726 | 1.67316630  | -5.46806667 |
| O  | 1.31201415  | -0.07869224 | 1.54369372  |
| O  | -0.17718588 | -0.20729712 | 1.87797245  |
| O  | -0.44271885 | 0.84070723  | -2.45415570 |
| O  | -0.21198501 | -0.64142404 | -2.18693010 |
| O  | -0.40128106 | 2.16176358  | 0.63770167  |
| O  | 0.38255936  | -2.19969023 | -0.16433963 |
| Zr | 0.18633624  | 0.08244150  | -0.18512522 |

Peroxo  $\eta^3$ -Ozone Complex to Spiro Bisperoxo Complex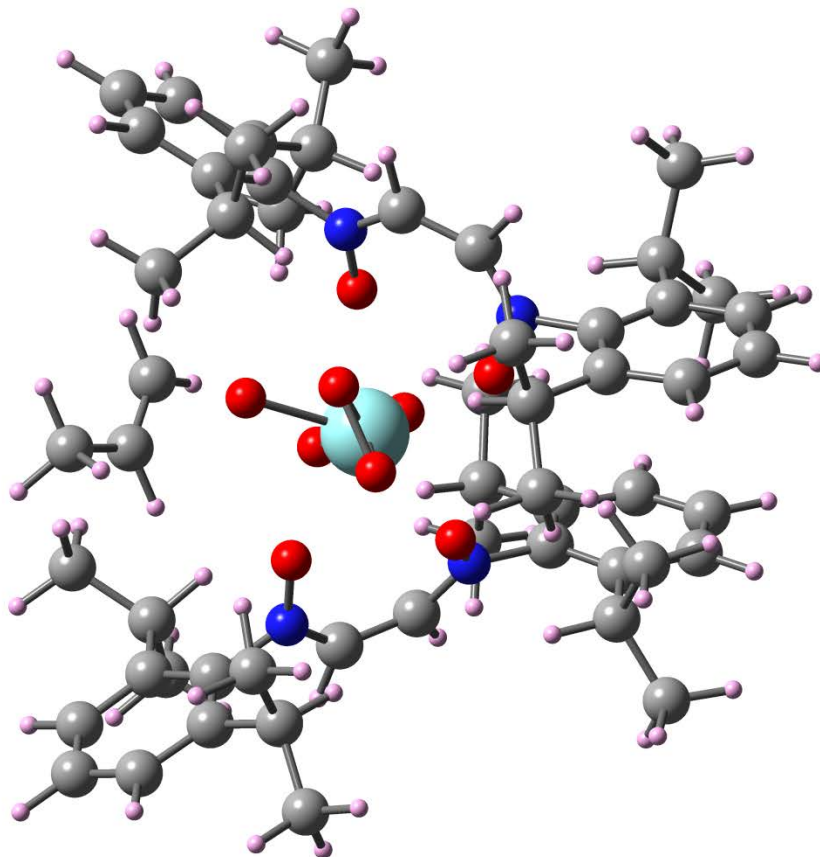Fig. S158: ONCCNO Peroxo  $\eta^3$ -Ozone Complex to Spiro Bisperoxo Complex

| SCF          | $E_{ZP}$     | H            | G            | imag freq<br>( $\text{cm}^{-1}$ ) |
|--------------|--------------|--------------|--------------|-----------------------------------|
| -3084.759833 | -3083.511989 | -3083.432900 | -3083.630394 | -349                              |

|   |             |             |             |
|---|-------------|-------------|-------------|
| O | -2.00455900 | -0.35249400 | -0.24969800 |
| O | 2.45265900  | -0.41729100 | -0.72834100 |
| O | 1.14345200  | 2.13952600  | -0.80950400 |
| N | 0.69336100  | -2.72846000 | 0.87264500  |
| N | 3.34008800  | -1.29126000 | -0.25631200 |
| N | -1.69663000 | 2.91530300  | 0.42923600  |
| N | -3.06744600 | 0.24184500  | -0.78718500 |
| C | 1.97556100  | -2.87406400 | 1.18957500  |
| C | 3.13519500  | -2.31460100 | 0.58364700  |
| C | -2.76764300 | 2.73394900  | -0.33701500 |
| C | -3.37993900 | 1.54085900  | -0.82538700 |
| C | -0.33583900 | -3.52409200 | 1.54901300  |
| C | -0.50866400 | -3.43217100 | 2.95942300  |
| C | -1.51584500 | -4.23791700 | 3.53393500  |
| C | -2.31004000 | -5.09198700 | 2.75723400  |
| C | -2.08970300 | -5.18524100 | 1.37550900  |

|   |             |             |             |
|---|-------------|-------------|-------------|
| C | -1.08819200 | -4.42299900 | 0.74062300  |
| C | -0.54692200 | -1.62802900 | 4.76460400  |
| C | 0.33601500  | -2.55763700 | 3.89618400  |
| C | 1.24667500  | -3.44259300 | 4.79172700  |
| C | 5.82466600  | 1.21026600  | 2.04346800  |
| C | 5.36647300  | -0.21620100 | 1.64481700  |
| C | 6.02742800  | -1.26286000 | 2.58421500  |
| C | 4.71336500  | -1.04759000 | -0.73325800 |
| C | 5.67396900  | -0.53201700 | 0.17327700  |
| C | 6.97303200  | -0.31409400 | -0.33462600 |
| C | 7.28032600  | -0.57447600 | -1.67897900 |
| C | 6.29328100  | -1.06021000 | -2.55182600 |
| C | 4.98106700  | -1.31146200 | -2.09985700 |
| C | -2.00719400 | -4.08539900 | -1.59839600 |
| C | -0.83469500 | -4.64648700 | -0.75609400 |
| C | -0.58138900 | -6.14374400 | -1.07270400 |
| C | 3.42260000  | -0.66315200 | -3.98820900 |
| C | 3.90885200  | -1.81804100 | -3.07030500 |
| C | 4.40149200  | -3.02764700 | -3.90405900 |
| C | -1.24234400 | 4.26808600  | 0.76592100  |
| C | -0.88327200 | 5.16176900  | -0.27978400 |
| C | -0.41865600 | 6.43635400  | 0.11113900  |
| C | -0.30436100 | 6.79164300  | 1.46269900  |
| C | -0.66821500 | 5.88022200  | 2.46648300  |
| C | -1.15379500 | 4.59653800  | 2.14653400  |
| C | 0.38335400  | 5.06415000  | -2.49859700 |
| C | -0.96694300 | 4.83360000  | -1.77831200 |
| C | -2.09981800 | 5.65593900  | -2.45203500 |
| C | -5.04936500 | -2.26753100 | 1.84948600  |
| C | -5.04187900 | -0.97445100 | 0.99692200  |
| C | -6.26569300 | -0.08105000 | 1.33825900  |
| C | -4.04977300 | -0.69597000 | -1.37594800 |
| C | -4.99858800 | -1.27977300 | -0.50431500 |
| C | -5.94543200 | -2.14816300 | -1.08656700 |
| C | -5.92677500 | -2.41604200 | -2.46519500 |
| C | -4.95613000 | -1.82823200 | -3.29150300 |
| C | -3.98061100 | -0.95360200 | -2.76534300 |
| C | -0.32522500 | 3.05026200  | 3.98467800  |
| C | -1.57173200 | 3.64450000  | 3.27499400  |
| C | -2.51611200 | 4.33614600  | 4.29197800  |
| C | -2.23089800 | -1.34627600 | -4.58825700 |
| C | -2.93323700 | -0.30823000 | -3.67940300 |
| C | -3.57673600 | 0.81658300  | -4.53558100 |
| H | 2.17576900  | -3.58480000 | 1.98204200  |
| H | 4.05744200  | -2.81170000 | 0.86120200  |
| H | -3.27854100 | 3.64599900  | -0.61830400 |
| H | -4.31115300 | 1.71971000  | -1.35030700 |
| H | -1.67960700 | -4.18611800 | 4.60661100  |
| H | -3.08531700 | -5.69246700 | 3.22764700  |
| H | -2.68573000 | -5.87356200 | 0.78263700  |
| H | 0.95638700  | -1.88746000 | 3.30011300  |
| H | 4.28237400  | -0.25492500 | 1.80249600  |

|   |             |             |             |
|---|-------------|-------------|-------------|
| H | -1.22820900 | -2.18708800 | 5.42129100  |
| H | -1.12400700 | -0.96288300 | 4.11563300  |
| H | 0.09382300  | -1.00197300 | 5.39999100  |
| H | 0.65470700  | -4.08860600 | 5.45434600  |
| H | 1.88296100  | -2.80698100 | 5.42161300  |
| H | 1.90314300  | -4.09774400 | 4.20045700  |
| H | 6.91552700  | 1.32080500  | 1.98617900  |
| H | 5.52292200  | 1.41742600  | 3.07821800  |
| H | 5.36584700  | 1.97041000  | 1.40255800  |
| H | 5.70404600  | -2.28692300 | 2.35580900  |
| H | 5.76594000  | -1.05115200 | 3.62900100  |
| H | 7.12156200  | -1.23422000 | 2.49524800  |
| H | 7.74333700  | 0.07626500  | 0.32451800  |
| H | 8.28689400  | -0.39223900 | -2.04813000 |
| H | 6.54293400  | -1.24970200 | -3.59193900 |
| H | 0.05514300  | -4.08718500 | -1.05422800 |
| H | 3.03572100  | -2.14548100 | -2.49586900 |
| H | -2.95670500 | -4.57660800 | -1.34406100 |
| H | -1.81788200 | -4.25084800 | -2.66754200 |
| H | -2.11191700 | -3.01050300 | -1.42576500 |
| H | -1.46964600 | -6.76169500 | -0.88699200 |
| H | 0.24238200  | -6.54944300 | -0.47030100 |
| H | -0.31688000 | -6.25733100 | -2.13260200 |
| H | 2.95465700  | 0.12756900  | -3.39406500 |
| H | 2.66845200  | -1.03716600 | -4.69245900 |
| H | 4.25629800  | -0.24107400 | -4.56710400 |
| H | 5.21062000  | -2.74919400 | -4.59208600 |
| H | 3.57460800  | -3.41654100 | -4.51210800 |
| H | 4.76657200  | -3.84094700 | -3.26282100 |
| H | -0.13011400 | 7.15020300  | -0.65516400 |
| H | 0.06652400  | 7.77725800  | 1.73395100  |
| H | -0.58463100 | 6.17097900  | 3.50955800  |
| H | -1.17724000 | 3.76932500  | -1.91080300 |
| H | -4.13519300 | -0.42446300 | 1.27170200  |
| H | 0.73663200  | 6.10048100  | -2.41032400 |
| H | 0.27146800  | 4.83685700  | -3.56693400 |
| H | 1.13143800  | 4.38260500  | -2.08885100 |
| H | -3.07578400 | 5.49725900  | -1.97089800 |
| H | -2.19181700 | 5.37341300  | -3.50869600 |
| H | -1.88707600 | 6.73231300  | -2.40834000 |
| H | -5.95671700 | -2.86186200 | 1.67802400  |
| H | -5.01602400 | -2.01070700 | 2.91620900  |
| H | -4.17872700 | -2.89283400 | 1.62499400  |
| H | -6.24645900 | 0.86240200  | 0.77667900  |
| H | -6.27276800 | 0.16039800  | 2.40918400  |
| H | -7.20741200 | -0.59305100 | 1.09998300  |
| H | -6.69747700 | -2.61762500 | -0.45810900 |
| H | -6.66698900 | -3.08714700 | -2.89478600 |
| H | -4.94717300 | -2.05484400 | -4.35387500 |
| H | -2.11482600 | 2.79778200  | 2.84417900  |
| H | -2.13924800 | 0.13415000  | -3.07053300 |
| H | 0.31430400  | 3.84603700  | 4.39202700  |



|    |             |             |             |
|----|-------------|-------------|-------------|
| H  | 0.25733600  | 2.43759100  | 3.29063400  |
| H  | -0.64034100 | 2.40626200  | 4.81644700  |
| H  | -2.87879000 | 3.59594900  | 5.01707500  |
| H  | -3.38736800 | 4.78566000  | 3.79699800  |
| H  | -2.00530900 | 5.12495800  | 4.85952300  |
| H  | -1.77342400 | -2.13994900 | -3.98865200 |
| H  | -1.42927600 | -0.84985500 | -5.14776600 |
| H  | -2.92038700 | -1.80300800 | -5.31210800 |
| H  | -4.02699200 | 1.59916000  | -3.90972000 |
| H  | -4.36287800 | 0.41893400  | -5.19229900 |
| H  | -2.81151800 | 1.28915800  | -5.16417600 |
| O  | 1.40614700  | 0.18458200  | 1.69468200  |
| O  | 0.02358500  | -0.37633200 | 1.94420000  |
| O  | -0.32699100 | 1.49886200  | -1.76005300 |
| O  | 0.07860900  | 0.13546000  | -2.24172200 |
| O  | -1.02255500 | 1.90962900  | 0.99695200  |
| O  | 0.33892400  | -2.03360600 | -0.25346400 |
| C  | 3.21881500  | 2.65149100  | -0.34569300 |
| H  | 3.57829900  | 1.62794000  | -0.36418200 |
| C  | 2.40523200  | 3.04376500  | 0.69037800  |
| H  | 2.15539200  | 2.36458400  | 1.49994600  |
| H  | 2.01756900  | 4.05853000  | 0.74320700  |
| C  | 3.70096700  | 3.54069000  | -1.46037000 |
| H  | 3.34564900  | 4.57100600  | -1.34747100 |
| H  | 4.80090200  | 3.55374000  | -1.49540400 |
| H  | 3.34783900  | 3.15160900  | -2.42440300 |
| Zr | 0.25960200  | 0.25824500  | -0.08463600 |

## Oxo Peroxo Complex to Dioxo Complex (conformation 1 lower energy)

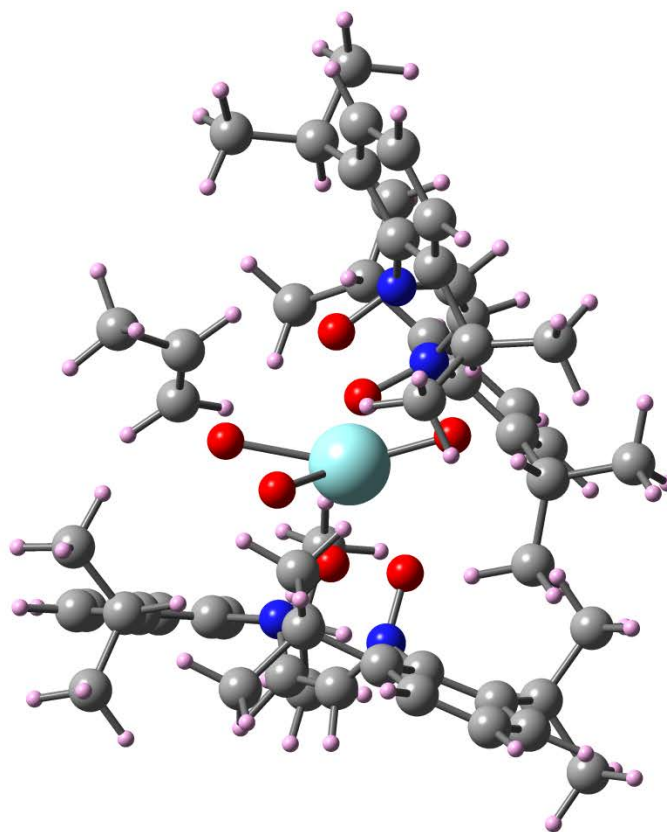

Fig. S159: ONCCNO Oxo Peroxo Complex to Dioxo Complex (conformation 1 lower energy)

| SCF          | E <sub>ZP</sub> | H            | G            | imag freq (cm <sup>-1</sup> ) |
|--------------|-----------------|--------------|--------------|-------------------------------|
| -2934.432523 | -2933.191623    | -2933.114274 | -2933.309099 | -476                          |

|    |             |             |             |
|----|-------------|-------------|-------------|
| Zr | -0.05093900 | 0.22064000  | -0.21497900 |
| O  | 1.92206800  | -0.93969300 | 0.27337600  |
| O  | -2.20838800 | 0.57404500  | 0.78423300  |
| O  | 0.33118000  | 1.16239600  | 1.40379500  |
| N  | -1.98021000 | -2.33920500 | -0.75199500 |
| N  | -3.46239100 | 0.22448400  | 0.57258900  |
| N  | 2.47070100  | 2.36942300  | -0.01903400 |
| N  | 2.63707900  | -0.60773500 | 1.37666400  |
| C  | -3.25841800 | -1.97719200 | -0.66357300 |
| C  | -3.91584200 | -0.89302300 | -0.01858800 |
| C  | 2.91641500  | 1.92296000  | 1.15046400  |
| C  | 2.98906200  | 0.61800100  | 1.74537000  |
| C  | -1.58858200 | -3.37796600 | -1.70898400 |
| C  | -1.84670800 | -3.16730800 | -3.09282900 |
| C  | -1.44287900 | -4.19335600 | -3.97402200 |
| C  | -0.80411800 | -5.35170800 | -3.50814900 |

|   |             |             |             |
|---|-------------|-------------|-------------|
| C | -0.56401500 | -5.52234600 | -2.13598500 |
| C | -0.95815000 | -4.54436700 | -1.20107800 |
| C | -1.72226900 | -1.27517600 | -4.81802500 |
| C | -2.53684100 | -1.92203800 | -3.67160300 |
| C | -3.97163500 | -2.27605700 | -4.15440300 |
| C | -4.05209600 | 3.55290600  | -1.92727200 |
| C | -4.41092900 | 2.13160200  | -1.42668000 |
| C | -5.45652000 | 1.48076900  | -2.37297300 |
| C | -4.45402400 | 1.23182500  | 0.99946600  |
| C | -4.91740100 | 2.14410800  | 0.02191600  |
| C | -5.87793700 | 3.08712900  | 0.44793300  |
| C | -6.31516000 | 3.12410700  | 1.78165600  |
| C | -5.78977500 | 2.23096200  | 2.73056200  |
| C | -4.83447800 | 1.26120400  | 2.36109000  |
| C | 0.80339800  | -4.68020600 | 0.61486000  |
| C | -0.71000800 | -4.78742700 | 0.29168400  |
| C | -1.28653900 | -6.14984500 | 0.75659300  |
| C | -3.00793200 | 1.10557800  | 4.09090600  |
| C | -4.18340100 | 0.35098200  | 3.40634700  |
| C | -5.18796300 | -0.18744100 | 4.45297400  |
| C | 2.67826000  | 3.77990300  | -0.38518000 |
| C | 1.74003700  | 4.73671600  | 0.07049000  |
| C | 1.96598800  | 6.07705100  | -0.31273400 |
| C | 3.06325700  | 6.43036300  | -1.11337800 |
| C | 3.96066800  | 5.44752800  | -1.56186800 |
| C | 3.78314000  | 4.09294200  | -1.21232900 |
| C | -0.77130900 | 4.48335300  | 0.02523600  |
| C | 0.50767800  | 4.35892300  | 0.89591400  |
| C | 0.38916400  | 5.21191900  | 2.18357100  |
| C | 4.86048100  | -3.48134100 | -0.38323400 |
| C | 4.91155700  | -2.27189100 | 0.58607200  |
| C | 6.37729000  | -1.89805700 | 0.93036600  |
| C | 2.99356300  | -1.74331300 | 2.23969100  |
| C | 4.09558000  | -2.54414600 | 1.85366000  |
| C | 4.42939400  | -3.62660000 | 2.69296300  |
| C | 3.68661000  | -3.89383100 | 3.85473200  |
| C | 2.58730300  | -3.09015600 | 4.19338600  |
| C | 2.20396700  | -1.99499600 | 3.38771800  |
| C | 4.69206500  | 2.94765200  | -3.28704500 |
| C | 4.75203900  | 3.03014800  | -1.73918500 |
| C | 6.20148100  | 3.28607300  | -1.25065100 |
| C | -0.30343400 | -2.02789600 | 3.76472300  |
| C | 0.97842100  | -1.15395100 | 3.76217300  |
| C | 1.17345800  | -0.45903200 | 5.13499800  |
| H | -3.92736500 | -2.62252400 | -1.22050700 |
| H | -4.99702400 | -0.93204700 | -0.07053800 |
| H | 3.37063100  | 2.69761300  | 1.75894400  |
| H | 3.49320000  | 0.62808900  | 2.70686800  |
| H | -1.61818900 | -4.07281100 | -5.03899700 |
| H | -0.49476400 | -6.12000200 | -4.21290600 |
| H | -0.07649500 | -6.42734300 | -1.78441000 |
| H | -2.59702200 | -1.14666900 | -2.90195000 |

|   |             |             |             |
|---|-------------|-------------|-------------|
| H | -3.48173600 | 1.55072900  | -1.48513700 |
| H | -1.53719600 | -1.96951000 | -5.64902600 |
| H | -0.77884500 | -0.90217200 | -4.41400300 |
| H | -2.27649100 | -0.41517600 | -5.21652100 |
| H | -3.94052000 | -2.99125400 | -4.98731600 |
| H | -4.48263900 | -1.37076100 | -4.50658100 |
| H | -4.58629000 | -2.72640900 | -3.36173700 |
| H | -4.93779800 | 4.19656300  | -2.02248900 |
| H | -3.57999800 | 3.47900200  | -2.91433600 |
| H | -3.33825600 | 4.03832700  | -1.25395600 |
| H | -5.68793000 | 0.44806700  | -2.08014900 |
| H | -5.06768300 | 1.46091700  | -3.39911400 |
| H | -6.39731600 | 2.04855700  | -2.37492000 |
| H | -6.26931700 | 3.80639200  | -0.26566900 |
| H | -7.05426200 | 3.86125900  | 2.08684900  |
| H | -6.11953300 | 2.29194100  | 3.76346600  |
| H | -1.21251700 | -4.00317400 | 0.86560800  |
| H | -3.74984900 | -0.51750900 | 2.89362100  |
| H | 1.38053100  | -5.43133000 | 0.05779900  |
| H | 0.97684100  | -4.84696400 | 1.68603200  |
| H | 1.18114300  | -3.68472500 | 0.36013900  |
| H | -0.77487500 | -6.99616000 | 0.28039300  |
| H | -2.35762900 | -6.23303600 | 0.52957300  |
| H | -1.15772000 | -6.25570700 | 1.84192000  |
| H | -2.23927300 | 1.37822600  | 3.35925500  |
| H | -2.54664000 | 0.46741800  | 4.85683200  |
| H | -3.36925500 | 2.01852000  | 4.58367700  |
| H | -5.57812000 | 0.61331300  | 5.09408900  |
| H | -4.68759900 | -0.91246200 | 5.10784800  |
| H | -6.04142900 | -0.68794700 | 3.97710500  |
| H | 1.27075700  | 6.84492800  | 0.01528400  |
| H | 3.21492700  | 7.46973600  | -1.39568400 |
| H | 4.79929400  | 5.73265400  | -2.19201200 |
| H | 0.56303300  | 3.30530200  | 1.19850400  |
| H | 4.46383900  | -1.42465200 | 0.05622700  |
| H | -0.91757500 | 5.51153200  | -0.33746300 |
| H | -1.64581900 | 4.19754500  | 0.62364400  |
| H | -0.72294000 | 3.80707800  | -0.83622400 |
| H | 1.29309300  | 5.13601800  | 2.80360100  |
| H | -0.45969700 | 4.85437000  | 2.78011500  |
| H | 0.21856800  | 6.27532100  | 1.96425000  |
| H | 5.32626200  | -4.37190900 | 0.05926000  |
| H | 5.39786400  | -3.24514400 | -1.31068700 |
| H | 3.82534400  | -3.72947200 | -0.64355700 |
| H | 6.42331000  | -1.01710300 | 1.58405000  |
| H | 6.93763600  | -1.67293200 | 0.01330700  |
| H | 6.89024000  | -2.72231200 | 1.44305300  |
| H | 5.27236400  | -4.26312000 | 2.43636800  |
| H | 3.96176400  | -4.73109000 | 4.49206800  |
| H | 2.01474400  | -3.31558800 | 5.08929500  |
| H | 4.44197100  | 2.05107000  | -1.35675400 |
| H | 0.81814300  | -0.36586100 | 3.01522400  |

|   |             |             |             |
|---|-------------|-------------|-------------|
| H | 5.01373700  | 3.88996300  | -3.74971200 |
| H | 3.67272700  | 2.73181300  | -3.62579600 |
| H | 5.35355900  | 2.15025100  | -3.65135400 |
| H | 6.86968000  | 2.49141500  | -1.60838600 |
| H | 6.25602900  | 3.31193200  | -0.15438000 |
| H | 6.58811100  | 4.24212700  | -1.62685800 |
| H | -0.47625800 | -2.46594000 | 2.77475400  |
| H | -1.17110800 | -1.40356800 | 4.01123600  |
| H | -0.24534800 | -2.83980400 | 4.50325100  |
| H | 2.06934600  | 0.17647700  | 5.14101600  |
| H | 1.27238200  | -1.18641600 | 5.95285400  |
| H | 0.30901700  | 0.18118600  | 5.35161000  |
| O | -1.14470400 | 0.93378100  | -1.69844200 |
| O | 0.24640400  | -0.18003700 | -2.38732200 |
| O | -0.99600100 | -1.82100500 | 0.02771300  |
| O | 1.78049400  | 1.64139000  | -0.90381500 |
| C | 1.70481700  | -1.72259700 | -2.89053000 |
| H | 1.92298100  | -2.15325800 | -1.91917000 |
| H | 1.20802400  | -2.35184800 | -3.62398300 |
| C | 2.01745000  | -0.40012900 | -3.16782500 |
| H | 2.57497500  | 0.16600300  | -2.42601900 |
| C | 1.91089500  | 0.23502400  | -4.53352200 |
| H | 1.42131300  | 1.21167500  | -4.44650800 |
| H | 2.90958900  | 0.38753400  | -4.97170600 |
| H | 1.32578900  | -0.38457000 | -5.22242300 |

## Oxo Peroxo Complex to Dioxo Complex (conformation 2 higher energy)

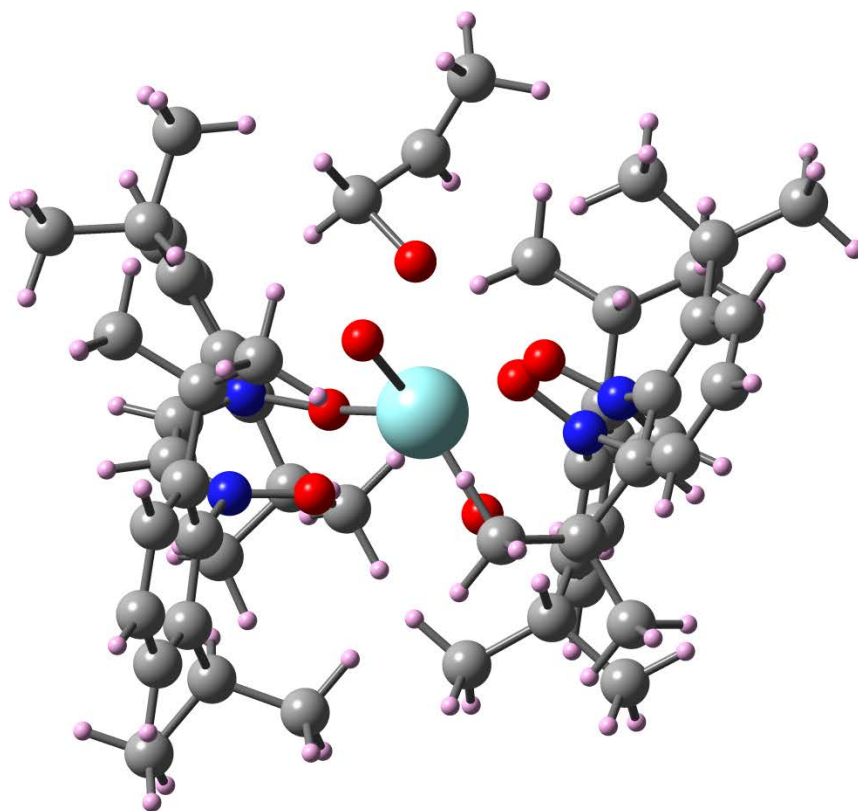

Fig. S160: ONCCNO Oxo Peroxo Complex to Dioxo Complex (conformation 2 higher energy)

| SCF            | E <sub>ZP</sub> | H            | G            | imag freq (cm <sup>-1</sup> ) |
|----------------|-----------------|--------------|--------------|-------------------------------|
| -2934.42565380 | -2933.185193    | -2933.107927 | -2933.303477 | -362                          |

|   |             |             |             |
|---|-------------|-------------|-------------|
| O | -1.87559500 | -0.21434600 | -0.11382800 |
| O | 2.50293200  | -0.37741000 | -0.86011400 |
| O | 0.47933200  | 1.48792000  | -1.68772200 |
| N | 1.04791000  | -2.77145400 | 0.95044200  |
| N | 3.48916300  | -0.85366900 | -0.11618600 |
| N | -1.38760300 | 3.08565800  | 0.35526500  |
| N | -3.05853100 | 0.35979100  | -0.52055300 |
| C | 2.32858300  | -2.62791800 | 1.28128500  |
| C | 3.40233200  | -1.81575700 | 0.80609300  |
| C | -2.63895600 | 2.84719500  | -0.11049900 |
| C | -3.34752000 | 1.68175300  | -0.45221400 |
| C | 0.21653700  | -3.69869100 | 1.73018300  |
| C | -0.09417900 | -3.36896400 | 3.07499500  |
| C | -0.85361100 | -4.31522700 | 3.79840700  |
| C | -1.29871400 | -5.50389000 | 3.20171000  |
| C | -1.00103200 | -5.77679000 | 1.85633600  |
| C | -0.23193000 | -4.88030100 | 1.08715600  |
| C | -0.88768100 | -1.28334300 | 4.30221000  |

|   |             |             |             |
|---|-------------|-------------|-------------|
| C | 0.33589200  | -2.05881200 | 3.74943900  |
| C | 1.36251200  | -2.32608600 | 4.88179000  |
| C | 3.79813400  | 2.91540200  | 1.16700300  |
| C | 4.20638400  | 1.46276400  | 1.52857200  |
| C | 4.85229900  | 1.40122300  | 2.93640800  |
| C | 4.79765600  | -0.21475000 | -0.35124700 |
| C | 5.14217200  | 0.89111100  | 0.45848900  |
| C | 6.39903500  | 1.48668900  | 0.21052500  |
| C | 7.23981500  | 1.00886400  | -0.80575400 |
| C | 6.84015600  | -0.06962100 | -1.61383600 |
| C | 5.59940300  | -0.70697400 | -1.40931800 |
| C | -1.20896000 | -4.96478000 | -1.24066200 |
| C | 0.06708600  | -5.18497500 | -0.38391800 |
| C | 0.63842700  | -6.61052800 | -0.58732700 |
| C | 4.44234600  | -1.17751200 | -3.59973600 |
| C | 5.11330400  | -1.81423700 | -2.34962400 |
| C | 6.23319100  | -2.80051400 | -2.75824600 |
| C | -0.98638600 | 4.46232700  | 0.65982000  |
| C | -0.42493600 | 5.24157300  | -0.37796100 |
| C | -0.06316200 | 6.56830600  | -0.05799800 |
| C | -0.22834200 | 7.06799100  | 1.24333900  |
| C | -0.74728600 | 6.24879800  | 2.26074200  |
| C | -1.13573800 | 4.91965500  | 1.99277500  |
| C | 1.23149400  | 4.94328200  | -2.29417700 |
| C | -0.20861600 | 4.68177900  | -1.78735100 |
| C | -1.25273800 | 5.26084700  | -2.77926200 |
| C | -4.13919100 | -2.88992400 | 2.20720300  |
| C | -4.03918200 | -1.52081700 | 1.49911400  |
| C | -4.80634300 | -0.44220100 | 2.31760600  |
| C | -4.10903300 | -0.58259400 | -0.91246200 |
| C | -4.55083500 | -1.53604400 | 0.05276600  |
| C | -5.55598100 | -2.44130900 | -0.33750400 |
| C | -6.12436600 | -2.39449300 | -1.62156200 |
| C | -5.69276300 | -1.43172300 | -2.54075200 |
| C | -4.67289500 | -0.50847300 | -2.21695800 |
| C | -0.39358200 | 3.35137600  | 3.82771800  |
| C | -1.61716000 | 3.99298000  | 3.11323600  |
| C | -2.54929600 | 4.69736800  | 4.12748700  |
| C | -3.92841300 | -0.14069500 | -4.64200600 |
| C | -4.26875700 | 0.52262800  | -3.28183600 |
| C | -5.39188600 | 1.57807400  | -3.48391700 |
| H | 2.62209900  | -3.28060800 | 2.09620800  |
| H | 4.34751400  | -2.01067300 | 1.29981600  |
| H | -3.21701000 | 3.75862400  | -0.21161900 |
| H | -4.37296300 | 1.88235600  | -0.74053900 |
| H | -1.10683500 | -4.10897300 | 4.83489800  |
| H | -1.88521400 | -6.21357300 | 3.78065200  |
| H | -1.36136200 | -6.69607400 | 1.40290000  |
| H | 0.79718100  | -1.38922100 | 3.01278100  |
| H | 3.27147300  | 0.88917000  | 1.56361400  |
| H | -1.40615100 | -1.83243200 | 5.10100400  |
| H | -1.60578800 | -1.06846800 | 3.50223000  |

|   |             |             |             |
|---|-------------|-------------|-------------|
| H | -0.55206700 | -0.32202800 | 4.71053900  |
| H | 0.93336900  | -2.94682000 | 5.68062500  |
| H | 1.68225900  | -1.37479100 | 5.32550400  |
| H | 2.25918400  | -2.84005800 | 4.50843400  |
| H | 4.66381600  | 3.59274700  | 1.14313500  |
| H | 3.08512200  | 3.29204300  | 1.91063900  |
| H | 3.30386600  | 2.94517700  | 0.18906200  |
| H | 5.11976200  | 0.37190300  | 3.21278200  |
| H | 4.14236200  | 1.77731900  | 3.68383000  |
| H | 5.76325300  | 2.01306500  | 2.99724200  |
| H | 6.71056600  | 2.33700600  | 0.81124100  |
| H | 8.20236300  | 1.48453800  | -0.97966900 |
| H | 7.49388700  | -0.41237700 | -2.41041300 |
| H | 0.81518000  | -4.47206700 | -0.74579000 |
| H | 4.33810000  | -2.39646000 | -1.83475100 |
| H | -2.01107500 | -5.65290900 | -0.94078300 |
| H | -0.98961000 | -5.14262000 | -2.30210700 |
| H | -1.57207500 | -3.93743900 | -1.12821400 |
| H | -0.08983000 | -7.38659000 | -0.31865400 |
| H | 1.54084000  | -6.77197700 | 0.01664800  |
| H | 0.90227900  | -6.75912400 | -1.64263800 |
| H | 3.58235700  | -0.56447900 | -3.30931000 |
| H | 4.09446800  | -1.96448200 | -4.28304500 |
| H | 5.15886000  | -0.54687200 | -4.14341800 |
| H | 6.99327100  | -2.31714100 | -3.38549600 |
| H | 5.80626600  | -3.62498200 | -3.34407200 |
| H | 6.73802900  | -3.22795100 | -1.88197300 |
| H | 0.36406300  | 7.20457100  | -0.82827700 |
| H | 0.06035100  | 8.09201800  | 1.47000400  |
| H | -0.84613100 | 6.64373700  | 3.26772700  |
| H | -0.31958300 | 3.59137400  | -1.76187000 |
| H | -2.98363900 | -1.23691200 | 1.47259200  |
| H | 1.43589600  | 6.01385900  | -2.43708600 |
| H | 1.37749600  | 4.43632200  | -3.25571600 |
| H | 1.96834400  | 4.53586100  | -1.59279300 |
| H | -2.27964200 | 5.02609300  | -2.46793000 |
| H | -1.09620600 | 4.83581900  | -3.77947100 |
| H | -1.16632900 | 6.35374200  | -2.85686300 |
| H | -5.18087100 | -3.18628700 | 2.39279500  |
| H | -3.63838400 | -2.83476800 | 3.18114900  |
| H | -3.64965400 | -3.68166200 | 1.62706900  |
| H | -4.69355900 | 0.55627900  | 1.87857800  |
| H | -4.41966900 | -0.40247100 | 3.34463600  |
| H | -5.87866300 | -0.67738200 | 2.36515500  |
| H | -5.90885400 | -3.18209300 | 0.37211300  |
| H | -6.90327600 | -3.10118400 | -1.89793800 |
| H | -6.14175500 | -1.39852100 | -3.52951700 |
| H | -2.18666400 | 3.17098500  | 2.66159500  |
| H | -3.37211200 | 1.05336800  | -2.94498400 |
| H | 0.24437900  | 4.12673900  | 4.27435100  |
| H | 0.20256900  | 2.76103400  | 3.12347500  |
| H | -0.73398500 | 2.68419000  | 4.63183000  |



|    |             |             |             |
|----|-------------|-------------|-------------|
| H  | -2.94758400 | 3.96178300  | 4.83849700  |
| H  | -3.39711500 | 5.18523600  | 3.62867000  |
| H  | -2.01649400 | 5.45823600  | 4.71283100  |
| H  | -3.16018100 | -0.91434500 | -4.53348600 |
| H  | -3.55376400 | 0.61779500  | -5.34208100 |
| H  | -4.81249000 | -0.60266000 | -5.09930600 |
| H  | -5.64100200 | 2.10150100  | -2.55168300 |
| H  | -6.31168800 | 1.10520800  | -3.85180600 |
| H  | -5.07858500 | 2.32889000  | -4.22093600 |
| O  | 1.17232600  | 0.15695300  | 1.48847400  |
| C  | -0.62528900 | -0.26478500 | -3.49705600 |
| H  | -1.57129600 | -0.18067000 | -2.95461000 |
| C  | -0.23673700 | -1.62953200 | -3.87813300 |
| H  | -0.50784500 | -2.43610800 | -3.19902600 |
| O  | 0.50756400  | -0.06322200 | -2.54715300 |
| H  | -0.55753800 | 0.47942400  | -4.29837200 |
| C  | 0.69522000  | -1.92689100 | -5.01411400 |
| H  | 1.60580600  | -2.44411700 | -4.67284200 |
| H  | 0.22150300  | -2.59331500 | -5.75778200 |
| H  | 1.00265800  | -1.00885800 | -5.52846300 |
| O  | -0.44635300 | 2.17332400  | 0.61146300  |
| O  | 0.41846400  | -2.13571000 | -0.06762100 |
| Zr | 0.29462300  | 0.13937900  | -0.15635300 |

## Butterfly Oxo Peroxo Complex to Dioxo Complex

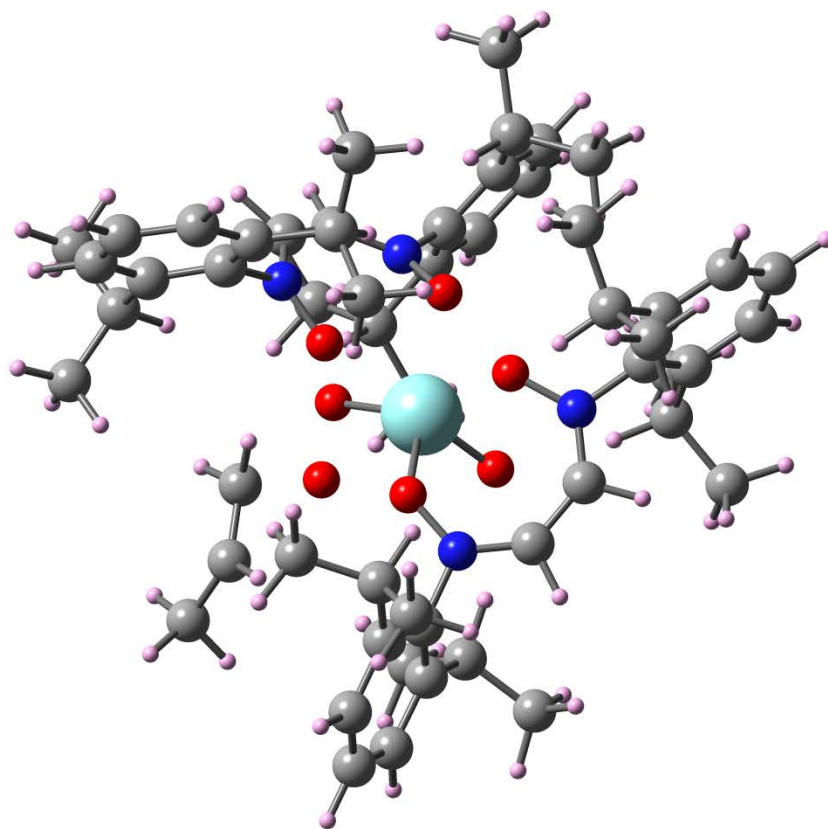

Fig. S161: ONCCNO Butterfly Oxo Peroxo Complex to Dioxo Complex

| SCF            | E <sub>ZP</sub> | H            | G            | imag freq (cm <sup>-1</sup> ) |
|----------------|-----------------|--------------|--------------|-------------------------------|
| -2934.44740240 | -2933.207491    | -2933.130192 | -2933.325604 | -68                           |

|   |             |             |             |
|---|-------------|-------------|-------------|
| O | -0.52884800 | 1.78432600  | 0.65349100  |
| O | -2.05996700 | -0.84376900 | 0.03519300  |
| O | -1.42512700 | 0.93797200  | -2.27706900 |
| N | 0.49810300  | -2.71746000 | 1.10658900  |
| N | -2.52439200 | -2.11993900 | -0.04603100 |
| N | 2.53203100  | 1.67993500  | -0.82119800 |
| N | 0.03292500  | 2.98517900  | 0.85934600  |
| C | -0.55555500 | -3.49352800 | 0.80146600  |
| C | -1.85496900 | -3.23318800 | 0.30018700  |
| C | 2.17650100  | 2.93812300  | -0.53740700 |
| C | 1.16054800  | 3.47488400  | 0.29342200  |
| C | 1.73742400  | -3.35173000 | 1.57250500  |
| C | 2.59678700  | -3.94729000 | 0.61526500  |
| C | 3.75883700  | -4.58039500 | 1.10895000  |
| C | 4.05180100  | -4.59887100 | 2.48098000  |
| C | 3.18926200  | -3.97541300 | 3.39729600  |
| C | 2.01248200  | -3.33227900 | 2.96183700  |

|   |             |             |             |
|---|-------------|-------------|-------------|
| C | 3.50833000  | -3.37906600 | -1.69749300 |
| C | 2.30732000  | -3.93232900 | -0.88956900 |
| C | 1.92441900  | -5.35157400 | -1.38837000 |
| C | -2.86748900 | -1.89704300 | -4.09895600 |
| C | -2.85788000 | -2.86012800 | -2.88335400 |
| C | -2.85766100 | -4.34002900 | -3.35019400 |
| C | -3.88128000 | -2.22737100 | -0.58130700 |
| C | -4.03857900 | -2.58440700 | -1.94445800 |
| C | -5.36301200 | -2.67273800 | -2.42750400 |
| C | -6.46056700 | -2.39579200 | -1.59810500 |
| C | -6.26285000 | -2.01826900 | -0.25908500 |
| C | -4.96373000 | -1.92279200 | 0.28031400  |
| C | 1.82674500  | -1.57168500 | 4.78374300  |
| C | 1.08089500  | -2.66644100 | 3.97875500  |
| C | 0.44425100  | -3.71672700 | 4.92711900  |
| C | -5.18101900 | -0.01274500 | 1.93619700  |
| C | -4.75775300 | -1.49191900 | 1.73566400  |
| C | -5.50639200 | -2.42439600 | 2.72247600  |
| C | 3.77216000  | 1.39422900  | -1.54885300 |
| C | 3.81030400  | 1.47063300  | -2.96343800 |
| C | 5.04105700  | 1.16660000  | -3.58836600 |
| C | 6.16847000  | 0.79842900  | -2.84196400 |
| C | 6.09489300  | 0.72871000  | -1.44102000 |
| C | 4.89720200  | 1.02598800  | -0.76150000 |
| C | 2.17599500  | 0.62212000  | -4.70505900 |
| C | 2.60085600  | 1.83025700  | -3.82847500 |
| C | 2.87858200  | 3.08205600  | -4.70066000 |
| C | -1.08738400 | 1.15826800  | 4.00484500  |
| C | -0.03338900 | 2.25264300  | 3.68452300  |
| C | 0.85333500  | 2.55655700  | 4.91806600  |
| C | -0.71942500 | 3.85738200  | 1.77455900  |
| C | -0.73242500 | 3.50498700  | 3.14841600  |
| C | -1.45375500 | 4.34191200  | 4.02409600  |
| C | -2.12862800 | 5.47805900  | 3.54995600  |
| C | -2.10840200 | 5.79012900  | 2.18291600  |
| C | -1.41430500 | 4.98072800  | 1.25739900  |
| C | 5.00393400  | -0.51655500 | 1.25125700  |
| C | 4.85322200  | 0.94952800  | 0.76897000  |
| C | 5.92508100  | 1.86433000  | 1.41684100  |
| C | -2.90645900 | 5.47252200  | -0.75238000 |
| C | -1.45097100 | 5.34455000  | -0.23289100 |
| C | -0.66558100 | 6.65555000  | -0.50869800 |
| H | -0.35573800 | -4.54700100 | 0.96122800  |
| H | -2.44853900 | -4.12856600 | 0.15120700  |
| H | 2.83849000  | 3.68205300  | -0.96886700 |
| H | 1.30968000  | 4.52249600  | 0.53069700  |
| H | 4.44193700  | -5.05182800 | 0.40769300  |
| H | 4.95334600  | -5.09298700 | 2.83599500  |
| H | 3.43032200  | -3.98998800 | 4.45732600  |
| H | 1.46907600  | -3.25886500 | -1.10238000 |
| H | -1.91258200 | -2.67020400 | -2.36404600 |
| H | 4.39535900  | -4.02411500 | -1.62339400 |

|   |             |             |             |
|---|-------------|-------------|-------------|
| H | 3.78046200  | -2.37344400 | -1.35699800 |
| H | 3.22891900  | -3.30536200 | -2.75558600 |
| H | 2.74376800  | -6.06838200 | -1.23659300 |
| H | 1.69414000  | -5.31787200 | -2.46073500 |
| H | 1.03899600  | -5.74013400 | -0.86639700 |
| H | -3.78363900 | -1.99847300 | -4.69808600 |
| H | -2.00935900 | -2.12026500 | -4.74493700 |
| H | -2.76481200 | -0.85846500 | -3.76678700 |
| H | -2.82288300 | -5.03514100 | -2.49975500 |
| H | -1.97789400 | -4.52938300 | -3.97803600 |
| H | -3.75294200 | -4.57869100 | -3.94091200 |
| H | -5.53077300 | -2.95058300 | -3.46470700 |
| H | -7.47035500 | -2.46717000 | -1.99590700 |
| H | -7.12176800 | -1.79857900 | 0.36996100  |
| H | 0.27168300  | -2.16722000 | 3.43579900  |
| H | -3.68891900 | -1.55013000 | 1.96834100  |
| H | 2.66307700  | -1.99145500 | 5.35734400  |
| H | 1.14229000  | -1.09125800 | 5.49549400  |
| H | 2.22446900  | -0.80221300 | 4.11147500  |
| H | 1.20820600  | -4.23106800 | 5.52504900  |
| H | -0.10919200 | -4.47920500 | 4.36373500  |
| H | -0.25444300 | -3.22983300 | 5.62050400  |
| H | -4.60618200 | 0.64780700  | 1.27756100  |
| H | -4.99913000 | 0.29688200  | 2.97392700  |
| H | -6.24881500 | 0.12934500  | 1.72225100  |
| H | -6.59333300 | -2.37905000 | 2.57574100  |
| H | -5.29773700 | -2.12413900 | 3.75781200  |
| H | -5.19474800 | -3.46993200 | 2.60027000  |
| H | 5.10592500  | 1.21083200  | -4.67217500 |
| H | 7.10194400  | 0.56377400  | -3.34845800 |
| H | 6.97575600  | 0.44450800  | -0.87125100 |
| H | 1.74140100  | 2.04632100  | -3.18881700 |
| H | 0.61555100  | 1.84593500  | 2.90218000  |
| H | 2.97542700  | 0.31992500  | -5.39667000 |
| H | 1.29115100  | 0.89016500  | -5.29603100 |
| H | 1.90566100  | -0.23605800 | -4.07967300 |
| H | 3.16121200  | 3.94921300  | -4.08755900 |
| H | 1.97595000  | 3.34566900  | -5.26693600 |
| H | 3.68705300  | 2.90594000  | -5.42339600 |
| H | -1.77852600 | 1.49252100  | 4.79133000  |
| H | -0.58862700 | 0.24464000  | 4.35155200  |
| H | -1.66451100 | 0.91243800  | 3.10727200  |
| H | 1.59792700  | 3.33182000  | 4.69503900  |
| H | 1.38819700  | 1.64844600  | 5.22366500  |
| H | 0.26081000  | 2.89489400  | 5.77811000  |
| H | -1.48381100 | 4.10477100  | 5.08393000  |
| H | -2.67412900 | 6.11413300  | 4.24297500  |
| H | -2.64755700 | 6.66366400  | 1.82636900  |
| H | 3.87181900  | 1.29078800  | 1.11215300  |
| H | -0.97421100 | 4.54285400  | -0.80652200 |
| H | 5.96496200  | -0.94491000 | 0.93605400  |
| H | 4.19676000  | -1.13708800 | 0.84933000  |

|    |             |             |             |
|----|-------------|-------------|-------------|
| H  | 4.95588900  | -0.56352100 | 2.34757500  |
| H  | 5.83297200  | 1.83494000  | 2.51082000  |
| H  | 5.81223900  | 2.90735800  | 1.09241600  |
| H  | 6.94291900  | 1.54221500  | 1.16127700  |
| H  | -3.47465000 | 4.55140300  | -0.58004200 |
| H  | -2.90151800 | 5.67203800  | -1.83199000 |
| H  | -3.43940700 | 6.29882200  | -0.26485300 |
| H  | 0.37920200  | 6.58459000  | -0.17869500 |
| H  | -1.12098500 | 7.50605700  | 0.01529000  |
| H  | -0.66742300 | 6.88047600  | -1.58318400 |
| O  | 0.19420400  | -1.64986500 | -1.81508900 |
| O  | -0.00507300 | 1.48863600  | -2.18983900 |
| O  | 1.94890200  | 0.59472500  | -0.21574300 |
| O  | 0.52468900  | -1.36573900 | 1.04096800  |
| Zr | -0.09847600 | -0.15981600 | -0.79113400 |
| C  | -2.54538300 | 2.04593000  | -1.79245400 |
| H  | -2.25723500 | 2.18223700  | -0.74408800 |
| C  | -3.86306100 | 1.51134200  | -2.01585000 |
| H  | -4.26292400 | 0.80935500  | -1.28619400 |
| C  | -4.64463600 | 1.74094200  | -3.27595500 |
| H  | -4.22899600 | 2.56964100  | -3.86390200 |
| H  | -4.64104300 | 0.84639900  | -3.92621300 |
| H  | -5.70424400 | 1.95651900  | -3.06479100 |
| H  | -2.27216000 | 2.89089000  | -2.42998700 |

## Dioxo Complex to Oxo Ozone Complex

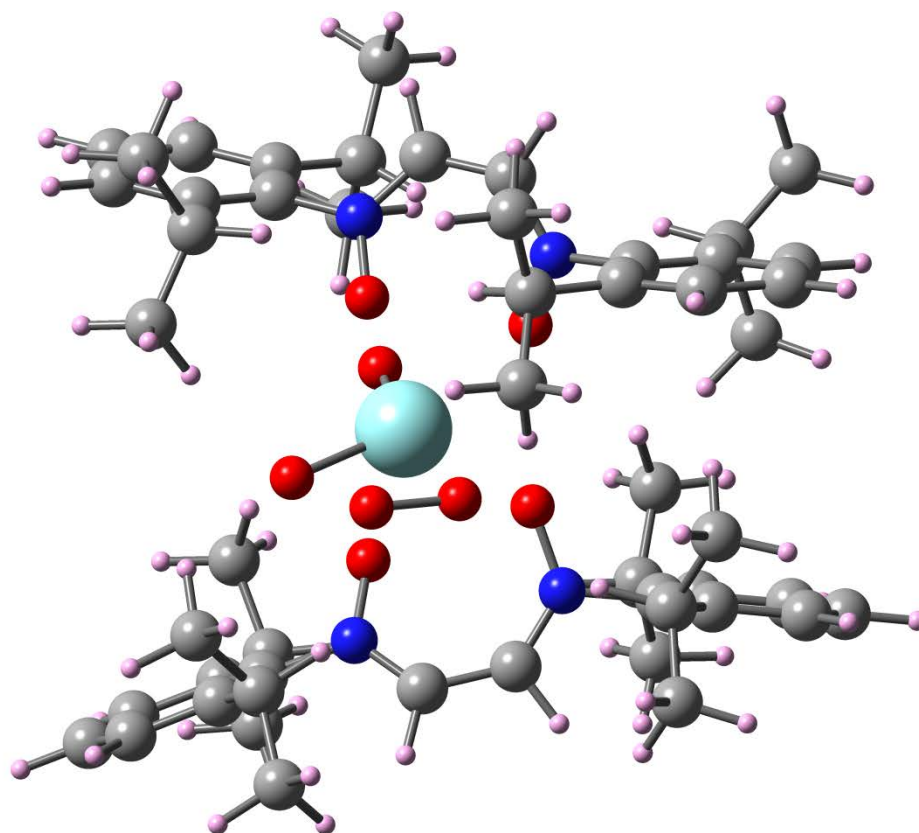

Fig. S162: ONCCNO Dioxo Complex to Oxo Ozone Complex

| SCF          | $E_{ZP}$     | H            | G            | imag freq<br>( $\text{cm}^{-1}$ ) |
|--------------|--------------|--------------|--------------|-----------------------------------|
| -2891.709228 | -2890.547302 | -2890.473985 | -2890.659428 | -142                              |

|   |             |             |             |
|---|-------------|-------------|-------------|
| O | 2.14623717  | -1.44351511 | 0.66743605  |
| O | -1.79247614 | 1.00134507  | 0.37440703  |
| O | -0.30243302 | -0.53822004 | -1.91038315 |
| N | -0.12605401 | 3.51501027  | 0.38289103  |
| N | -2.67977021 | 1.92697814  | 0.03962600  |
| N | -0.49292204 | -2.89171622 | 0.21913702  |
| N | 2.60686920  | -2.28591417 | -0.26597602 |
| C | -1.35819810 | 3.91438230  | 0.69105305  |
| C | -2.54488719 | 3.23781625  | 0.27954402  |
| C | 0.47849804  | -3.55088827 | -0.42575403 |
| C | 1.83224614  | -3.24710525 | -0.76406306 |
| C | 1.06243808  | 4.19568532  | 0.89617807  |
| C | 1.27981310  | 4.26452333  | 2.30013718  |
| C | 2.43647119  | 4.94898138  | 2.72778421  |
| C | 3.33445825  | 5.51383442  | 1.81111314  |
| C | 3.09081124  | 5.41890939  | 0.43308103  |

|   |             |             |             |
|---|-------------|-------------|-------------|
| C | 1.94628715  | 4.76401036  | -0.06356400 |
| C | 1.14307809  | 2.73190521  | 4.33459333  |
| C | 0.35842303  | 3.64339228  | 3.35848226  |
| C | -0.41761803 | 4.74703236  | 4.12931532  |
| C | -4.38561833 | -0.81985006 | 2.06684416  |
| C | -4.68863536 | 0.67098005  | 1.75934513  |
| C | -5.88713346 | 1.18361509  | 2.59649320  |
| C | -3.92361430 | 1.44819811  | -0.58492905 |
| C | -4.90309337 | 0.86537406  | 0.25536202  |
| C | -6.09623145 | 0.43646103  | -0.36169803 |
| C | -6.28761449 | 0.58591105  | -1.74556714 |
| C | -5.28338241 | 1.15098809  | -2.54635920 |
| C | -4.06449931 | 1.59126112  | -1.98615215 |
| C | 2.73119721  | 3.79040229  | -2.27145217 |
| C | 1.70860613  | 4.73093436  | -1.57866412 |
| C | 1.74580613  | 6.15594249  | -2.19126317 |
| C | -2.55052919 | 1.17309809  | -3.99180231 |
| C | -2.97027823 | 2.17611916  | -2.88634122 |
| C | -3.42511626 | 3.52716127  | -3.50029027 |
| C | -1.71770013 | -3.64417428 | 0.55331804  |
| C | -2.68682321 | -3.83822329 | -0.45826203 |
| C | -3.83303729 | -4.58082135 | -0.10061801 |
| C | -3.99970230 | -5.07355039 | 1.20331709  |
| C | -3.02535123 | -4.83248837 | 2.18586016  |
| C | -1.85360414 | -4.10783531 | 1.88345414  |
| C | -3.76175529 | -2.46139219 | -2.31130718 |
| C | -2.52632219 | -3.28966025 | -1.88077314 |
| C | -2.26608117 | -4.44068434 | -2.89060522 |
| C | 4.62213135  | -1.11366308 | 2.69292021  |
| C | 4.54544835  | -2.46343019 | 1.92812815  |
| C | 5.39039541  | -3.55389227 | 2.63476320  |
| C | 4.02616231  | -2.17742317 | -0.61401805 |
| C | 4.95446638  | -2.26607618 | 0.46253504  |
| C | 6.32099948  | -2.16551817 | 0.13678101  |
| C | 6.74284149  | -1.99456815 | -1.19100809 |
| C | 5.80009645  | -1.90675914 | -2.22341117 |
| C | 4.41362233  | -1.98171915 | -1.96645515 |
| C | -1.37212711 | -2.81522521 | 4.00870931  |
| C | -0.81211906 | -3.82472029 | 2.97102522  |
| C | -0.32865203 | -5.12538439 | 3.66156228  |
| C | 3.71333228  | -0.50150404 | -3.91176430 |
| C | 3.43981426  | -1.81656514 | -3.13912024 |
| C | 3.50030527  | -3.04289323 | -4.08953231 |
| H | -1.44714311 | 4.85712037  | 1.21620809  |
| H | -3.45036726 | 3.82171129  | 0.16197001  |
| H | 0.16630601  | -4.54480135 | -0.72707206 |
| H | 2.31881818  | -3.94346930 | -1.43482411 |
| H | 2.64592020  | 5.01698138  | 3.79110729  |
| H | 4.22548932  | 6.02356647  | 2.17028417  |
| H | 3.79206629  | 5.86250545  | -0.26762102 |
| H | -0.35687203 | 2.98257023  | 2.86146122  |
| H | -3.80459229 | 1.24174210  | 2.06698516  |

|   |             |             |             |
|---|-------------|-------------|-------------|
| H | 1.91155015  | 3.28174025  | 4.89505038  |
| H | 1.59816112  | 1.91798015  | 3.76258629  |
| H | 0.44826103  | 2.29308618  | 5.06455239  |
| H | 0.27038502  | 5.39907641  | 4.68386136  |
| H | -1.10273709 | 4.28843733  | 4.85459937  |
| H | -1.00943108 | 5.38880344  | 3.46052327  |
| H | -5.22347440 | -1.46387411 | 1.76758814  |
| H | -4.21878832 | -0.95665107 | 3.14331124  |
| H | -3.48643327 | -1.14883809 | 1.53575312  |
| H | -6.11344347 | 2.23534017  | 2.37721918  |
| H | -5.65682245 | 1.09932008  | 3.66642128  |
| H | -6.79582954 | 0.59708105  | 2.40941618  |
| H | -6.87906251 | -0.01250600 | 0.24319802  |
| H | -7.21746258 | 0.25305302  | -2.20077917 |
| H | -5.43924244 | 1.24291210  | -3.61764728 |
| H | 0.71788006  | 4.31202333  | -1.77844513 |
| H | -2.07245516 | 2.36110318  | -2.28790418 |
| H | 3.76192429  | 4.12872532  | -2.09284416 |
| H | 2.55879420  | 3.78917329  | -3.35679126 |
| H | 2.62475020  | 2.76199921  | -1.90824115 |
| H | 2.74199521  | 6.61061052  | -2.11371416 |
| H | 1.02918108  | 6.82883750  | -1.70051013 |
| H | 1.49154212  | 6.10385345  | -3.25821825 |
| H | -2.13722816 | 0.26411802  | -3.54340127 |
| H | -1.76440414 | 1.61981313  | -4.61350535 |
| H | -3.39224326 | 0.90918507  | -4.64693436 |
| H | -4.30618633 | 3.39775526  | -4.14317932 |
| H | -2.61982520 | 3.95038030  | -4.11412632 |
| H | -3.68255028 | 4.26027332  | -2.72362721 |
| H | -4.60267435 | -4.76389537 | -0.84556707 |
| H | -4.89260938 | -5.64060841 | 1.45618711  |
| H | -3.17441024 | -5.20984340 | 3.19399924  |
| H | -1.66874413 | -2.60810820 | -1.91269115 |
| H | 3.49929327  | -2.78332621 | 1.96693115  |
| H | -4.66753835 | -3.07933523 | -2.37800918 |
| H | -3.58368828 | -2.01932415 | -3.29927325 |
| H | -3.95238430 | -1.64451713 | -1.60726912 |
| H | -1.36717611 | -5.01720538 | -2.63329120 |
| H | -2.12549116 | -4.03158931 | -3.89915630 |
| H | -3.11261024 | -5.13997339 | -2.92144022 |
| H | 5.64249942  | -0.70620705 | 2.66848120  |
| H | 4.33756433  | -1.25937510 | 3.74389229  |
| H | 3.93596130  | -0.38491103 | 2.25128517  |
| H | 5.37733040  | -4.50161335 | 2.07998616  |
| H | 4.98472538  | -3.73875229 | 3.63824228  |
| H | 6.43739647  | -3.24922725 | 2.75961821  |
| H | 7.06105556  | -2.22878917 | 0.92886107  |
| H | 7.80403058  | -1.92258115 | -1.41774211 |
| H | 6.13791749  | -1.75320813 | -3.24406025 |
| H | 0.06156800  | -3.34795925 | 2.51363519  |
| H | 2.42073718  | -1.70865413 | -2.76130021 |
| H | -2.26499117 | -3.21411525 | 4.50940234  |



|    |             |             |             |
|----|-------------|-------------|-------------|
| H  | -1.63395312 | -1.86925414 | 3.52329927  |
| H  | -0.61483805 | -2.60465420 | 4.77462137  |
| H  | 0.45604203  | -4.89001238 | 4.39198133  |
| H  | 0.08314801  | -5.83792945 | 2.93490523  |
| H  | -1.14301609 | -5.62691145 | 4.20046132  |
| H  | 3.59744128  | 0.34758803  | -3.23186325 |
| H  | 2.97366123  | -0.39122703 | -4.71498236 |
| H  | 4.71404836  | -0.48215304 | -4.36503633 |
| H  | 3.27947825  | -3.98665631 | -3.56935227 |
| H  | 4.49440434  | -3.14603924 | -4.54520035 |
| H  | 2.76913121  | -2.92314823 | -4.89938537 |
| O  | 1.01083907  | 0.95789207  | 1.76265814  |
| O  | 0.77423506  | 0.00958500  | -2.62679320 |
| O  | 2.09682816  | 0.58202504  | -1.24004809 |
| O  | -0.52920104 | -1.62041112 | 0.61512105  |
| O  | 0.04377400  | 2.53078419  | -0.51753404 |
| Zr | 0.59957105  | 0.33152403  | 0.09392301  |

Oxo  $\eta^2$ -Ozone Complex to Oxo  $\eta^3$ -Ozone Complex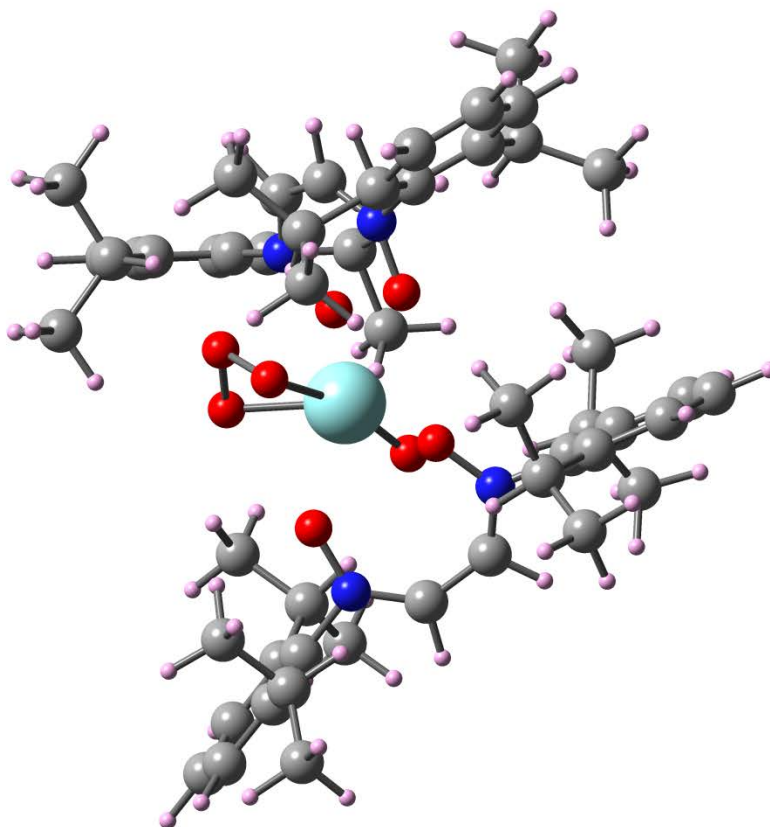Fig. S163: ONCCNO Oxo  $\eta^2$ -Ozone Complex to Oxo  $\eta^3$ -Ozone Complex

| SCF          | $E_{ZP}$     | H            | G            | imag freq<br>( $\text{cm}^{-1}$ ) |
|--------------|--------------|--------------|--------------|-----------------------------------|
| -2891.730444 | -2890.567614 | -2890.494795 | -2890.679104 | -94                               |

|   |             |             |             |
|---|-------------|-------------|-------------|
| O | -1.84483814 | -0.14007401 | -0.23777402 |
| O | 2.50718619  | -0.65708205 | -0.78202406 |
| O | 1.36132310  | 1.86115114  | -1.22355509 |
| N | 0.61515205  | -2.79432121 | 0.91439907  |
| N | 3.36235226  | -1.30046410 | 0.00794300  |
| N | -1.22776410 | 3.11431824  | 0.08548101  |
| N | -2.87476022 | 0.47991804  | -0.81850406 |
| C | 1.85975814  | -2.82767321 | 1.37256911  |
| C | 3.07506723  | -2.19957817 | 0.94752807  |
| C | -2.32307718 | 2.96284223  | -0.65810305 |
| C | -3.05880123 | 1.79376014  | -1.01185908 |
| C | -0.42002103 | -3.60842527 | 1.57147612  |
| C | -0.87979807 | -3.23098025 | 2.85820422  |
| C | -1.86929114 | -4.05342431 | 3.44177326  |
| C | -2.38002218 | -5.17218640 | 2.76707621  |
| C | -1.91244614 | -5.50060541 | 1.48393911  |

|   |             |             |             |
|---|-------------|-------------|-------------|
| C | -0.91787607 | -4.72537936 | 0.85416606  |
| C | -1.53288512 | -1.04904208 | 3.99487930  |
| C | -0.36833503 | -1.99877815 | 3.61455127  |
| C | 0.42852903  | -2.41650719 | 4.87878637  |
| C | 4.14534232  | 2.36963118  | 0.95235307  |
| C | 4.42777434  | 0.95810207  | 1.53692312  |
| C | 5.08085939  | 1.05434808  | 2.93817822  |
| C | 4.77216636  | -0.92073807 | -0.20567502 |
| C | 5.28583840  | 0.15337101  | 0.55583404  |
| C | 6.63427353  | 0.50264104  | 0.32288002  |
| C | 7.40308658  | -0.17626801 | -0.63474505 |
| C | 6.83914550  | -1.21149809 | -1.39996810 |
| C | 5.49889442  | -1.60563912 | -1.20911109 |
| C | -1.53232712 | -4.74040436 | -1.59604812 |
| C | -0.43622103 | -5.08684739 | -0.55400304 |
| C | -0.00586700 | -6.57130752 | -0.66421005 |
| C | 4.33934333  | -1.96822215 | -3.41926626 |
| C | 4.84355137  | -2.65178520 | -2.11600716 |
| C | 5.77059942  | -3.84833429 | -2.43597319 |
| C | -0.66072705 | 4.44614134  | 0.33139503  |
| C | -0.16602301 | 5.21408640  | -0.75597806 |
| C | 0.38321403  | 6.47658548  | -0.44079203 |
| C | 0.45218103  | 6.93602352  | 0.88074407  |
| C | -0.03867200 | 6.14333849  | 1.93051915  |
| C | -0.61242205 | 4.88074637  | 1.68560813  |
| C | 1.26295210  | 4.75873236  | -2.81354421 |
| C | -0.16985101 | 4.76111336  | -2.22182217 |
| C | -1.12444308 | 5.64582043  | -3.06883224 |
| C | -4.99677238 | -1.47438011 | 2.12383516  |
| C | -4.93637738 | -0.29197702 | 1.12302609  |
| C | -6.09613646 | 0.70724005  | 1.38080610  |
| C | -3.95275730 | -0.42890203 | -1.26917409 |
| C | -4.94755638 | -0.78447406 | -0.32779002 |
| C | -5.98799348 | -1.62079412 | -0.78400306 |
| C | -6.01361444 | -2.08294816 | -2.10943716 |
| C | -4.99322338 | -1.72695713 | -3.00532023 |
| C | -3.92596730 | -0.89297207 | -2.60630320 |
| C | 0.01751500  | 3.40391626  | 3.64898628  |
| C | -1.15163009 | 4.05736031  | 2.86275622  |
| C | -2.05253716 | 4.90140438  | 3.80060029  |
| C | -2.28375617 | -1.71783713 | -4.38426733 |
| C | -2.82565322 | -0.50043704 | -3.59604427 |
| C | -3.33480226 | 0.59170404  | -4.57602535 |
| H | 1.98801315  | -3.49061027 | 2.22099717  |
| H | 3.95120530  | -2.52924319 | 1.49500112  |
| H | -2.73597621 | 3.88919130  | -1.03812408 |
| H | -3.97457331 | 2.00350215  | -1.55178212 |
| H | -2.24776017 | -3.80411729 | 4.42942334  |
| H | -3.14470224 | -5.78574442 | 3.23790925  |
| H | -2.31944618 | -6.36642951 | 0.96906907  |
| H | 0.29280102  | -1.40941211 | 2.96788923  |
| H | 3.45080526  | 0.47673604  | 1.66033713  |

|   |             |             |             |
|---|-------------|-------------|-------------|
| H | -2.24091817 | -1.51472212 | 4.69499436  |
| H | -2.08235816 | -0.73521306 | 3.09977023  |
| H | -1.12566609 | -0.14764701 | 4.46978934  |
| H | -0.20129902 | -2.96454023 | 5.59350645  |
| H | 0.81877706  | -1.52401612 | 5.38440941  |
| H | 1.28305610  | -3.06065323 | 4.62836735  |
| H | 5.07655739  | 2.93277722  | 0.79583806  |
| H | 3.51282427  | 2.93666322  | 1.64732412  |
| H | 3.61314128  | 2.30084417  | -0.00362800 |
| H | 5.27981940  | 0.06012500  | 3.36119926  |
| H | 4.40559634  | 1.58426812  | 3.62189528  |
| H | 6.03038947  | 1.60644112  | 2.91348022  |
| H | 7.07610356  | 1.31867610  | 0.88795807  |
| H | 8.43917663  | 0.11120701  | -0.79847706 |
| H | 7.44142256  | -1.70779313 | -2.15512916 |
| H | 0.43445003  | -4.46982334 | -0.79964106 |
| H | 3.95778530  | -3.05285323 | -1.60684412 |
| H | -2.44481419 | -5.32686541 | -1.42192311 |
| H | -1.17380209 | -4.95970238 | -2.61050820 |
| H | -1.78502914 | -3.67656028 | -1.54047412 |
| H | -0.85037807 | -7.25460854 | -0.50716404 |
| H | 0.77093606  | -6.82163254 | 0.07024001  |
| H | 0.39512003  | -6.76927950 | -1.66686813 |
| H | 3.62371728  | -1.17157809 | -3.19007124 |
| H | 3.84036529  | -2.70434821 | -4.06358931 |
| H | 5.17915340  | -1.53546912 | -3.97990231 |
| H | 6.62751953  | -3.54657127 | -3.05158323 |
| H | 5.21514040  | -4.60613135 | -3.00362223 |
| H | 6.15764247  | -4.31910033 | -1.52261911 |
| H | 0.77772306  | 7.09339057  | -1.24311909 |
| H | 0.89037807  | 7.90798062  | 1.09474808  |
| H | 0.01785300  | 6.51235051  | 2.95032622  |
| H | -0.51100804 | 3.72576928  | -2.28747018 |
| H | -3.99366431 | 0.23447202  | 1.31018410  |
| H | 1.72057513  | 5.75725744  | -2.79656421 |
| H | 1.22689909  | 4.41866134  | -3.85644530 |
| H | 1.89063115  | 4.05545731  | -2.25779117 |
| H | -2.15469316 | 5.63161541  | -2.68356220 |
| H | -1.14445309 | 5.28645440  | -4.10564131 |
| H | -0.79377606 | 6.69285049  | -3.08218924 |
| H | -5.93891446 | -2.03051716 | 2.03345515  |
| H | -4.92816538 | -1.09869608 | 3.15300224  |
| H | -4.16940332 | -2.17395017 | 1.96004115  |
| H | -6.04063646 | 1.57166912  | 0.70623306  |
| H | -6.05699248 | 1.07788708  | 2.41350318  |
| H | -7.07237651 | 0.22786302  | 1.23107609  |
| H | -6.77704550 | -1.91395315 | -0.09680301 |
| H | -6.82538451 | -2.72565521 | -2.44210019 |
| H | -5.01691538 | -2.10427216 | -4.02350931 |
| H | -1.76264814 | 3.23657425  | 2.47373319  |
| H | -1.96426715 | -0.09879801 | -3.05079023 |
| H | 0.71171705  | 4.16740932  | 4.02674131  |

|    |             |             |             |
|----|-------------|-------------|-------------|
| H  | 0.56540404  | 2.70498020  | 3.00948123  |
| H  | -0.37491903 | 2.84578322  | 4.51016634  |
| H  | -2.50153519 | 4.25060432  | 4.56251535  |
| H  | -2.86432522 | 5.39326440  | 3.24841025  |
| H  | -1.48479911 | 5.67749746  | 4.32962733  |
| H  | -1.94314415 | -2.50545519 | -3.70300128 |
| H  | -1.42110411 | -1.40049011 | -4.98183338 |
| H  | -3.03288223 | -2.14468616 | -5.06631939 |
| H  | -3.67158728 | 1.49295311  | -4.04594431 |
| H  | -4.17503632 | 0.22521002  | -5.18241240 |
| H  | -2.52390019 | 0.88645807  | -5.25337640 |
| O  | 1.11434109  | -0.02526200 | 1.55206212  |
| O  | 0.20291902  | 1.59145612  | -2.21710317 |
| O  | 0.14097101  | 0.09328401  | -2.40638618 |
| O  | -0.63940305 | 2.11039316  | 0.75500506  |
| O  | 0.19892002  | -2.07198116 | -0.14363201 |
| Zr | 0.44195403  | 0.26908502  | -0.15400901 |

Oxo  $\eta^3$ -Ozone Complex to Oxo Peroxo Complex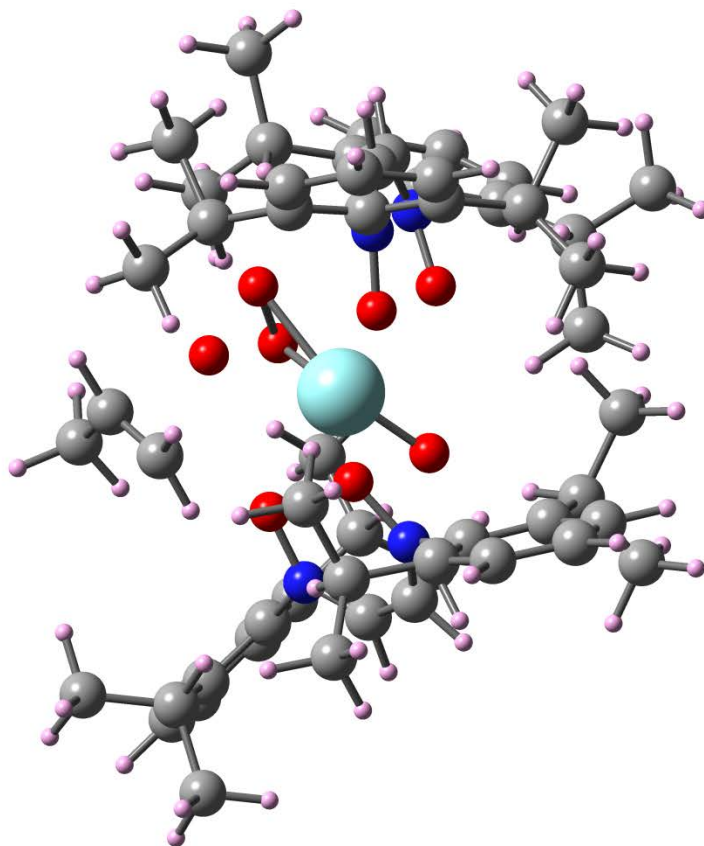Fig. S164: ONCCNO Oxo  $\eta^3$ -Ozone Complex to Oxo Peroxo Complex

| SCF          | $E_{ZP}$     | H            | G            | imag freq<br>( $\text{cm}^{-1}$ ) |
|--------------|--------------|--------------|--------------|-----------------------------------|
| -3009.596990 | -3008.352123 | -3008.274346 | -3008.467672 | -430                              |

|   |             |             |             |
|---|-------------|-------------|-------------|
| O | -1.83802100 | -0.53270000 | -0.38173900 |
| O | 2.56660300  | -0.22960000 | -0.70599900 |
| O | 0.83572400  | 2.14142100  | -1.18464000 |
| N | 1.05055900  | -2.49393800 | 1.20485900  |
| N | 3.47771000  | -0.53408900 | 0.22291800  |
| N | -1.93635900 | 2.77263500  | 0.18472800  |
| N | -3.00028700 | -0.07938500 | -0.86164400 |
| C | 2.23407500  | -2.17561200 | 1.71582600  |
| C | 3.30068400  | -1.32614000 | 1.27832300  |
| C | -2.95146000 | 2.46444400  | -0.61603500 |
| C | -3.44442200 | 1.17665900  | -0.98984000 |
| C | 0.18352500  | -3.44026300 | 1.92218300  |
| C | -0.40592700 | -3.03352500 | 3.14589000  |
| C | -1.22095900 | -3.98355800 | 3.80122000  |
| C | -1.45076100 | -5.25256500 | 3.24993200  |
| C | -0.87170200 | -5.60657900 | 2.02000500  |

|   |             |             |             |
|---|-------------|-------------|-------------|
| C | -0.03838000 | -4.70711100 | 1.32514500  |
| C | -1.57872600 | -0.94094000 | 3.98854300  |
| C | -0.21462700 | -1.64038100 | 3.75901800  |
| C | 0.58539700  | -1.72163500 | 5.08607600  |
| C | 3.38166700  | 3.40704300  | 0.46441800  |
| C | 3.84317800  | 2.17737600  | 1.29134200  |
| C | 4.29577600  | 2.59959300  | 2.71305000  |
| C | 4.78675900  | 0.11811700  | 0.03612100  |
| C | 4.95403900  | 1.42395400  | 0.55436100  |
| C | 6.21481000  | 2.02657700  | 0.35143900  |
| C | 7.23954900  | 1.35695100  | -0.33482900 |
| C | 7.02701200  | 0.06701000  | -0.84781900 |
| C | 5.78571600  | -0.58191800 | -0.68234900 |
| C | -0.53928800 | -5.03592500 | -1.12814800 |
| C | 0.55737100  | -5.09769000 | -0.03084400 |
| C | 1.24184800  | -6.48697600 | 0.00041900  |
| C | 5.87294700  | -2.02837500 | -2.78215000 |
| C | 5.56587900  | -1.98325200 | -1.26331200 |
| C | 6.40729900  | -3.04111000 | -0.49994200 |
| C | -1.57367600 | 4.16504100  | 0.46903200  |
| C | -1.25656100 | 5.04983400  | -0.59912200 |
| C | -0.90651000 | 6.37099500  | -0.24453500 |
| C | -0.85439100 | 6.78330300  | 1.09305900  |
| C | -1.15893800 | 5.87811400  | 2.12136100  |
| C | -1.52922300 | 4.54845000  | 1.84064100  |
| C | 0.13585200  | 4.96939000  | -2.73281900 |
| C | -1.24072300 | 4.66866900  | -2.08587000 |
| C | -2.38449800 | 5.38873000  | -2.85065900 |
| C | -4.78931800 | -2.27159700 | 2.17708200  |
| C | -4.86502000 | -1.11672200 | 1.14681600  |
| C | -6.12302600 | -0.24088100 | 1.39514100  |
| C | -3.93207500 | -1.15627400 | -1.26732600 |
| C | -4.83807000 | -1.63864100 | -0.29363300 |
| C | -5.74875200 | -2.63462200 | -0.70547800 |
| C | -5.73392400 | -3.12453600 | -2.02029800 |
| C | -4.79911700 | -2.63907600 | -2.94897800 |
| C | -3.86237800 | -1.64415200 | -2.59438100 |
| C | -0.55489400 | 3.10259600  | 3.67950300  |
| C | -1.86122500 | 3.60628900  | 3.00562300  |
| C | -2.80758800 | 4.26536900  | 4.04178400  |
| C | -2.31516200 | -2.21993800 | -4.54598700 |
| C | -2.85623800 | -1.10564200 | -3.61721800 |
| C | -3.49481000 | 0.02459300  | -4.47285400 |
| H | 2.44757400  | -2.68810400 | 2.64718700  |
| H | 4.16661400  | -1.35255800 | 1.93090100  |
| H | -3.51636500 | 3.30483200  | -0.99833200 |
| H | -4.40892300 | 1.21323900  | -1.48397300 |
| H | -1.68785100 | -3.71731700 | 4.74565900  |
| H | -2.08580000 | -5.96353200 | 3.77352000  |
| H | -1.06597900 | -6.58897500 | 1.59878200  |
| H | 0.33382100  | -0.99342000 | 3.06258700  |
| H | 2.96660500  | 1.53010000  | 1.40950800  |

|   |             |             |             |
|---|-------------|-------------|-------------|
| H | -2.21062200 | -1.48180600 | 4.70715900  |
| H | -2.12461700 | -0.84599300 | 3.04292100  |
| H | -1.40706700 | 0.07033200  | 4.37649700  |
| H | 0.05186200  | -2.30713200 | 5.84791500  |
| H | 0.74698500  | -0.71206200 | 5.48471000  |
| H | 1.57085100  | -2.18627600 | 4.94130600  |
| H | 4.21005700  | 4.10759200  | 0.28449700  |
| H | 2.59181800  | 3.94063800  | 1.00807000  |
| H | 2.96120900  | 3.09620500  | -0.49819900 |
| H | 4.62744300  | 1.73555500  | 3.30511100  |
| H | 3.45387400  | 3.06614400  | 3.23977100  |
| H | 5.11925100  | 3.32665700  | 2.68405500  |
| H | 6.39001700  | 3.02885700  | 0.73283200  |
| H | 8.20229900  | 1.84248000  | -0.47707200 |
| H | 7.82590200  | -0.43387400 | -1.38828700 |
| H | 1.31900200  | -4.36045700 | -0.30689400 |
| H | 4.50926200  | -2.25088200 | -1.14669500 |
| H | -1.34521500 | -5.75334600 | -0.92157100 |
| H | -0.10826900 | -5.27980400 | -2.10839200 |
| H | -0.96946400 | -4.03014400 | -1.17663300 |
| H | 0.52220500  | -7.29446700 | 0.18678100  |
| H | 2.01476400  | -6.53780300 | 0.77848900  |
| H | 1.71732500  | -6.68905200 | -0.96827900 |
| H | 5.26674000  | -1.29637700 | -3.32701200 |
| H | 5.64673800  | -3.02537100 | -3.18231500 |
| H | 6.93046500  | -1.81804300 | -2.98680300 |
| H | 7.48112900  | -2.83310300 | -0.59343800 |
| H | 6.22089000  | -4.04387500 | -0.90666800 |
| H | 6.16214900  | -3.05494100 | 0.57025500  |
| H | -0.65080200 | 7.07489900  | -1.03102400 |
| H | -0.57120600 | 7.80494300  | 1.33537900  |
| H | -1.11560600 | 6.20907500  | 3.15458200  |
| H | -1.36634800 | 3.58831300  | -2.19041500 |
| H | -3.98148200 | -0.48917800 | 1.31035600  |
| H | 0.39743900  | 6.03539900  | -2.68924100 |
| H | 0.11355500  | 4.67039500  | -3.78912400 |
| H | 0.90982800  | 4.37743800  | -2.23482200 |
| H | -3.37434600 | 5.17236100  | -2.42215400 |
| H | -2.39180300 | 5.06873100  | -3.90070600 |
| H | -2.25322700 | 6.47905300  | -2.83254800 |
| H | -5.67139500 | -2.92284700 | 2.12267300  |
| H | -4.74087200 | -1.86164300 | 3.19395800  |
| H | -3.89703900 | -2.88722900 | 2.01587000  |
| H | -6.16476600 | 0.61144000  | 0.70442600  |
| H | -6.11734000 | 0.15259100  | 2.42003900  |
| H | -7.04296000 | -0.82527300 | 1.26171300  |
| H | -6.46605100 | -3.03135800 | 0.00779400  |
| H | -6.44562800 | -3.89014100 | -2.32026300 |
| H | -4.79060100 | -3.04139600 | -3.95710300 |
| H | -2.37073200 | 2.72043000  | 2.61390500  |
| H | -1.99063500 | -0.68298100 | -3.09162500 |
| H | 0.05592900  | 3.94699800  | 4.02946100  |



|    |             |             |             |
|----|-------------|-------------|-------------|
| H  | 0.03029500  | 2.49549400  | 2.98063700  |
| H  | -0.80083500 | 2.48155000  | 4.55258900  |
| H  | -3.11133700 | 3.51759800  | 4.78629400  |
| H  | -3.71435300 | 4.66517100  | 3.56842100  |
| H  | -2.32060300 | 5.08464900  | 4.58630400  |
| H  | -1.92476500 | -3.06710500 | -3.96915000 |
| H  | -1.49735800 | -1.81989200 | -5.15664000 |
| H  | -3.08427700 | -2.59760100 | -5.23357000 |
| H  | -3.83213500 | 0.86531800  | -3.85418700 |
| H  | -4.35817500 | -0.34915900 | -5.04104000 |
| H  | -2.75539500 | 0.41587900  | -5.18262400 |
| O  | 0.96762800  | 0.36365000  | 1.50877100  |
| O  | -0.37618500 | 1.62921200  | -1.94837300 |
| O  | 0.22419300  | 0.04035600  | -2.58157700 |
| O  | -1.24212700 | 1.83449500  | 0.83592500  |
| O  | 0.54635400  | -2.00003800 | 0.05875800  |
| Zr | 0.32485800  | 0.31545200  | -0.25140100 |
| C  | 1.26980400  | -0.85801800 | -3.92718800 |
| H  | 0.55165100  | -0.76680700 | -4.74253000 |
| C  | 1.16094500  | -1.95438300 | -3.08820100 |
| H  | 0.31704700  | -2.63314500 | -3.15068000 |
| H  | 1.88610600  | -2.12738700 | -2.29967100 |
| C  | 2.49393500  | 0.02066300  | -4.04261400 |
| H  | 3.12037100  | -0.29578900 | -4.89235700 |
| H  | 2.18919200  | 1.06042500  | -4.20488300 |
| H  | 3.08077100  | -0.01254100 | -3.12053900 |

## TS for Ligand Cyclization

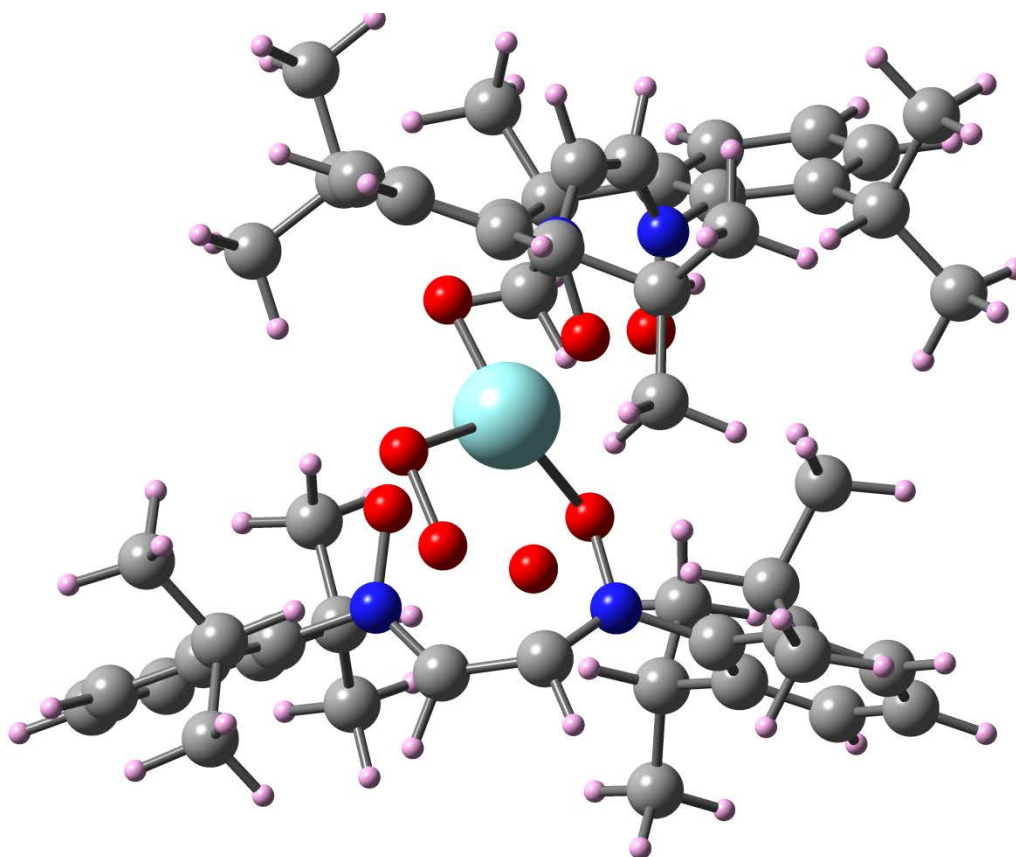

Fig. S165: ONCCNO TS for Ligand Cyclization

| SCF            | E <sub>ZP</sub> | H            | G            | imag freq<br>(cm <sup>-1</sup> ) |
|----------------|-----------------|--------------|--------------|----------------------------------|
| -2891.73866196 | -2890.576002    | -2890.503175 | -2890.688530 | -152                             |

|   |             |             |             |
|---|-------------|-------------|-------------|
| O | -2.33200224 | 0.58929400  | -0.73076102 |
| O | 1.59261013  | -1.12883695 | -0.61467401 |
| O | -0.87580314 | 0.83132409  | 2.14095520  |
| N | 2.71147308  | 1.97421534  | -0.22152998 |
| N | 2.61956921  | -1.01276989 | -1.45406007 |
| N | -1.35771907 | -1.52772612 | 1.69571317  |
| N | -3.34680431 | 0.50809495  | 0.14664005  |
| C | 3.33725215  | 1.42372133  | -1.25169706 |
| C | 3.32917721  | 0.07972022  | -1.74916210 |
| C | -2.16825018 | -0.53396208 | 2.13970320  |
| C | -3.29288829 | 0.04943491  | 1.38512814  |
| C | 2.88768403  | 3.39924945  | 0.09012304  |
| C | 2.38817595  | 4.36948751  | -0.81613903 |
| C | 2.61235690  | 5.72211763  | -0.47662100 |
| C | 3.27065994  | 6.07970270  | 0.70771609  |
| C | 3.71677702  | 5.08849362  | 1.59700516  |

|   |             |             |             |
|---|-------------|-------------|-------------|
| C | 3.53334006  | 3.72138451  | 1.31257513  |
| C | 0.16525676  | 4.65415842  | -1.99632912 |
| C | 1.58830890  | 4.04022444  | -2.08230913 |
| C | 2.32915093  | 4.51930951  | -3.35809822 |
| C | -0.24008395 | -2.35437513 | -3.77244226 |
| C | 1.13498213  | -1.64499401 | -3.89719026 |
| C | 1.40765712  | -1.21334697 | -5.36032238 |
| C | 2.95513329  | -2.26459898 | -2.16504213 |
| C | 2.24517025  | -2.55001803 | -3.35470622 |
| C | 2.58602633  | -3.74746010 | -4.01979927 |
| C | 3.57138845  | -4.60699713 | -3.50866123 |
| C | 4.23162548  | -4.29841407 | -2.30845314 |
| C | 3.93024741  | -3.11725100 | -1.59807108 |
| C | 3.02411708  | 2.63875940  | 3.53248630  |
| C | 3.99595215  | 2.66481645  | 2.32098021  |
| C | 5.45893826  | 2.88626353  | 2.78042125  |
| C | 4.34967048  | -3.94011604 | 0.76853509  |
| C | 4.62735844  | -2.81918194 | -0.26707799 |
| C | 6.15203155  | -2.60740986 | -0.46003500 |
| C | -0.95702899 | -2.68962719 | 2.46625422  |
| C | 0.07671809  | -2.61419114 | 3.43782030  |
| C | 0.40731817  | -3.79911021 | 4.13283335  |
| C | -0.24198583 | -5.01156733 | 3.86207633  |
| C | -1.24288990 | -5.06729438 | 2.87887226  |
| C | -1.62076798 | -3.91277731 | 2.16530520  |
| C | 2.31506821  | -1.47828094 | 3.16545428  |
| C | 0.87263509  | -1.33879000 | 3.72222632  |
| C | 0.89115508  | -0.97846497 | 5.22927043  |
| C | -4.25138631 | -1.16144822 | -3.09640020 |
| C | -4.82852835 | -1.24123125 | -1.65606109 |
| C | -5.89833736 | -2.35455939 | -1.54257608 |
| C | -4.62737644 | 1.00406193  | -0.39105399 |
| C | -5.35769146 | 0.13347883  | -1.23646106 |
| C | -6.58237854 | 0.61586981  | -1.74128010 |
| C | -7.03885864 | 1.90511188  | -1.42004407 |
| C | -6.26893564 | 2.74788198  | -0.60495101 |
| C | -5.02972552 | 2.32293001  | -0.07669997 |
| C | -2.10537298 | -4.73185640 | -0.17753098 |
| C | -2.68469006 | -4.01009237 | 1.06879512  |
| C | -3.98237513 | -4.69839248 | 1.56210016  |
| C | -3.80260354 | 4.54244823  | -0.06238897 |
| C | -4.18416051 | 3.28530512  | 0.76207209  |
| C | -4.91076958 | 3.68133812  | 2.07379619  |
| H | 3.98462917  | 2.10219340  | -1.79478710 |
| H | 4.05555827  | -0.09690376 | -2.53453616 |
| H | -2.40432119 | -0.62471910 | 3.19683828  |
| H | -4.21866937 | 0.16860788  | 1.93783919  |
| H | 2.24401783  | 6.49884066  | -1.14071505 |
| H | 3.42339490  | 7.12955274  | 0.94666710  |
| H | 4.21070804  | 5.37913568  | 2.51981223  |
| H | 1.42974093  | 2.96015835  | -2.16196113 |
| H | 1.06292108  | -0.73248395 | -3.29440621 |

|   |             |             |             |
|---|-------------|-------------|-------------|
| H | 0.19312871  | 5.75245351  | -1.96001011 |
| H | -0.35502326 | 4.27868237  | -1.10828005 |
| H | -0.41282327 | 4.35487937  | -2.88001018 |
| H | 2.46231690  | 5.60973361  | -3.36534522 |
| H | 1.74788590  | 4.24577647  | -4.24780629 |
| H | 3.32596303  | 4.06387652  | -3.45133623 |
| H | -0.27544091 | -3.27738120 | -4.36839430 |
| H | -1.03262404 | -1.68364412 | -4.12626028 |
| H | -0.45411495 | -2.60609216 | -2.72700918 |
| H | 2.37224918  | -0.69641288 | -5.45435140 |
| H | 0.62181503  | -0.52296695 | -5.69096841 |
| H | 1.41532217  | -2.06920803 | -6.04917743 |
| H | 2.07151531  | -4.00781015 | -4.94070734 |
| H | 3.81782251  | -5.52330616 | -4.03986828 |
| H | 4.97804257  | -4.98337509 | -1.91476711 |
| H | 3.94227219  | 1.67632537  | 1.85265817  |
| H | 4.21411637  | -1.89386789 | 0.15095605  |
| H | 3.02788603  | 3.60253347  | 4.05938934  |
| H | 3.32877613  | 1.86102436  | 4.24618636  |
| H | 2.00190300  | 2.42893634  | 3.20081828  |
| H | 5.57392223  | 3.82104761  | 3.34370229  |
| H | 6.14954230  | 2.91967957  | 1.92735318  |
| H | 5.76981428  | 2.06605448  | 3.44088830  |
| H | 3.27317640  | -4.07275510 | 0.92529711  |
| H | 4.80693950  | -3.68339400 | 1.73292917  |
| H | 4.76931555  | -4.90047609 | 0.44194007  |
| H | 6.63354464  | -3.51279890 | -0.85156503 |
| H | 6.62610356  | -2.36331881 | 0.49955307  |
| H | 6.35951756  | -1.78870778 | -1.16162705 |
| H | 1.18877723  | -3.76882017 | 4.88787741  |
| H | 0.03476824  | -5.91058840 | 4.40836637  |
| H | -1.73353489 | -6.01356147 | 2.66587424  |
| H | 0.40400702  | -0.50169896 | 3.20025828  |
| H | -3.99469527 | -1.51745224 | -1.00063904 |
| H | 2.85686029  | -2.29813498 | 3.65821131  |
| H | 2.87151320  | -0.54693785 | 3.33234729  |
| H | 2.29435622  | -1.67413896 | 2.08661419  |
| H | -0.12649801 | -0.88180701 | 5.62986045  |
| H | 1.40210007  | -0.01787888 | 5.37490946  |
| H | 1.41934415  | -1.73230501 | 5.82890650  |
| H | -5.03193738 | -0.88686923 | -3.81890826 |
| H | -3.83693423 | -2.13431528 | -3.39202922 |
| H | -3.45063328 | -0.41582813 | -3.14520721 |
| H | -6.31612243 | -2.41086041 | -0.52884201 |
| H | -5.44905529 | -3.32710744 | -1.78269010 |
| H | -6.72894746 | -2.19662341 | -2.24246814 |
| H | -7.17954957 | -0.01763227 | -2.39102015 |
| H | -7.98882277 | 2.25602187  | -1.81644010 |
| H | -6.62276371 | 3.75122805  | -0.38392399 |
| H | -2.94164812 | -2.99452030 | 0.75034209  |
| H | -3.24123442 | 2.80595313  | 1.03590012  |
| H | -1.80453891 | -5.76076948 | 0.06310804  |

|    |             |             |             |
|----|-------------|-------------|-------------|
| H  | -1.23168594 | -4.18887931 | -0.55304101 |
| H  | -2.85761604 | -4.77638843 | -0.97739404 |
| H  | -4.74259918 | -4.67878551 | 0.76970609  |
| H  | -4.39503818 | -4.19275746 | 2.44520022  |
| H  | -3.81114706 | -5.74968253 | 1.82753717  |
| H  | -3.24656048 | 4.25964824  | -0.96307504 |
| H  | -3.15631252 | 5.19383031  | 0.53879508  |
| H  | -4.68784163 | 5.11972624  | -0.36318099 |
| H  | -5.16164556 | 2.79994304  | 2.67971824  |
| H  | -5.84334367 | 4.22579911  | 1.87223118  |
| H  | -4.26291856 | 4.33076920  | 2.67563224  |
| O  | 0.34738994  | 0.97331515  | -1.93211711 |
| O  | -1.08437222 | 2.29484419  | 1.89377518  |
| O  | -0.69036220 | 2.49358322  | 0.46765707  |
| O  | -0.90916604 | -1.48128509 | 0.34948706  |
| O  | 1.92232805  | 1.26797225  | 0.61644608  |
| Zr | -0.09912607 | 0.52301010  | -0.21271598 |

## 12. ONCCNO Triplet Transition States

### Oxo Peroxo Complex to Dioxo Complex

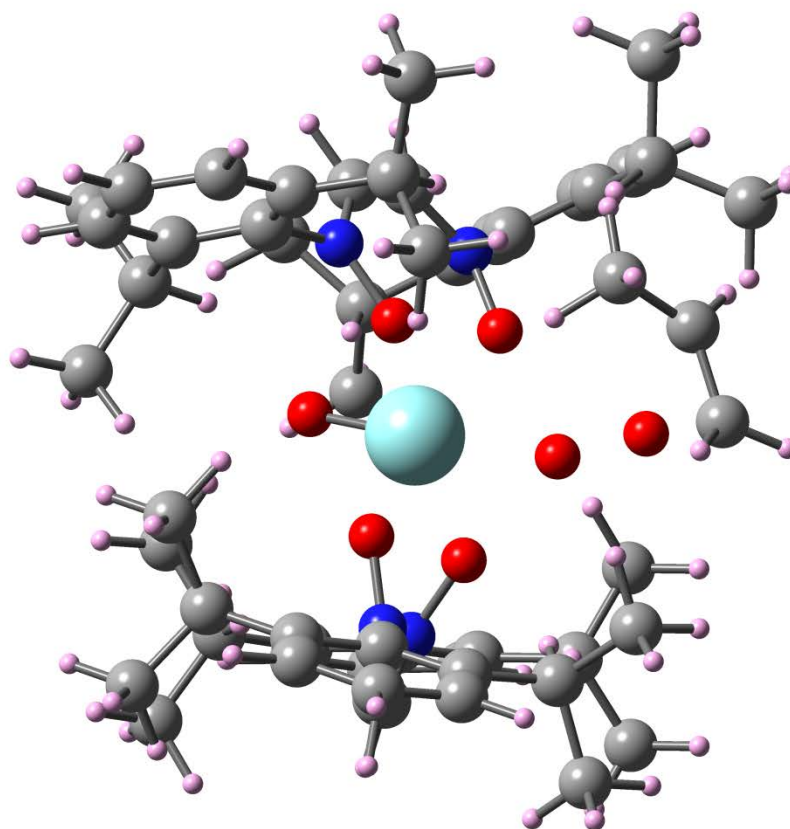

Fig. S166: ONCCNO Oxo Peroxo Complex to Dioxo Complex

| SCF          | E <sub>ZP</sub> | H            | G            | imag freq (cm <sup>-1</sup> ) |
|--------------|-----------------|--------------|--------------|-------------------------------|
| -2934.459578 | -2933.219375    | -2933.142356 | -2933.338246 | -89                           |

|    |             |             |             |
|----|-------------|-------------|-------------|
| Zr | 0.03384203  | -0.04094098 | 0.10720703  |
| O  | -1.93186807 | -0.95092418 | 0.05854903  |
| O  | 1.76348309  | 1.04054821  | 0.87443509  |
| O  | 0.44554705  | 0.05846305  | 3.49375629  |
| O  | -0.61388703 | -0.01226402 | 2.49484822  |
| N  | -0.49461022 | 2.98908021  | -0.73219003 |
| N  | 2.53552309  | 1.96593733  | 0.18067004  |
| N  | 0.37711626  | -3.21066321 | -0.20486599 |
| N  | -2.58382404 | -2.11468132 | 0.39568305  |
| C  | 0.77217685  | 3.45490933  | -0.92235505 |
| C  | 2.04443398  | 3.02398938  | -0.52928102 |
| C  | -0.83654379 | -3.82851933 | -0.23478600 |
| C  | -2.10533292 | -3.36706038 | 0.12311403  |

|   |             |             |             |
|---|-------------|-------------|-------------|
| C | -1.61943534 | 3.57858218  | -1.43957509 |
| C | -1.79458534 | 3.28676515  | -2.81804819 |
| C | -2.88532746 | 3.89721012  | -3.47574425 |
| C | -3.77741758 | 4.73184113  | -2.78642019 |
| C | -3.59670159 | 4.97770416  | -1.41529408 |
| C | -2.51302946 | 4.41037519  | -0.71513903 |
| C | -1.65765618 | 1.20389900  | -4.27846031 |
| C | -0.86586120 | 2.34746914  | -3.59529725 |
| C | -0.02933619 | 3.13282125  | -4.63998733 |
| C | 4.38742341  | -0.90972876 | -2.27724615 |
| C | 3.94809929  | 0.54163232  | -1.96467913 |
| C | 4.18710225  | 1.45339741  | -3.19946622 |
| C | 3.97586721  | 1.78353442  | 0.30182005  |
| C | 4.66602930  | 1.10426441  | -0.73480103 |
| C | 6.06763143  | 0.98392750  | -0.61001502 |
| C | 6.74601041  | 1.50065958  | 0.50422806  |
| C | 6.03379234  | 2.14840558  | 1.52636414  |
| C | 4.63395922  | 2.29778650  | 1.44759014  |
| C | -3.43680050 | 3.94301309  | 1.59335015  |
| C | -2.33920347 | 4.68134122  | 0.78152508  |
| C | -2.32913657 | 6.19727631  | 1.10421111  |
| C | 4.17305818  | 2.40506448  | 3.94965632  |
| C | 3.87584611  | 3.02607451  | 2.56055822  |
| C | 4.20265904  | 4.54366764  | 2.55712922  |
| C | 1.55045139  | -3.78925617 | -0.82367404 |
| C | 2.61173850  | -4.22734913 | 0.01617402  |
| C | 3.75149463  | -4.77778210 | -0.60286502 |
| C | 3.82719064  | -4.90769010 | -1.99954413 |
| C | 2.76379153  | -4.47414814 | -2.80372319 |
| C | 1.60655340  | -3.89369617 | -2.24026515 |
| C | 3.52795949  | -3.04280198 | 2.06256818  |
| C | 2.54721449  | -4.12761113 | 1.54387914  |
| C | 2.81969060  | -5.49472620 | 2.22266119  |
| C | -4.93153937 | 0.16913670  | -1.96209412 |
| C | -4.60246225 | -1.29633739 | -1.57644910 |
| C | -5.33223825 | -2.29577251 | -2.51214617 |
| C | -3.95752015 | -1.94357439 | 0.84313808  |
| C | -4.93936225 | -1.56224243 | -0.10686599 |
| C | -6.27121835 | -1.44260751 | 0.34224505  |
| C | -6.60927435 | -1.69457355 | 1.68128215  |
| C | -5.61447330 | -2.05472551 | 2.60392222  |
| C | -4.26473516 | -2.17247343 | 2.20900119  |
| C | 0.99655225  | -2.26047609 | -4.10053329 |
| C | 0.49415328  | -3.39744221 | -3.17286822 |
| C | -0.11208868 | -4.56926234 | -3.99012128 |
| C | -3.27832912 | -1.65137533 | 4.50080837  |
| C | -3.18904806 | -2.54062939 | 3.23573727  |
| C | -3.27420596 | -4.04194351 | 3.62095330  |
| H | 0.78748779  | 4.33629940  | -1.55551709 |
| H | 2.84643999  | 3.65070348  | -0.90634505 |
| H | -0.79350872 | -4.85360540 | -0.58972902 |
| H | -2.87802893 | -4.12768449 | 0.17372504  |

|   |             |             |             |
|---|-------------|-------------|-------------|
| H | -3.04335446 | 3.70206910  | -4.53338832 |
| H | -4.61480868 | 5.18418810  | -3.31316723 |
| H | -4.29860668 | 5.61930617  | -0.88858204 |
| H | -0.17968612 | 1.85488515  | -2.89973620 |
| H | 2.86932821  | 0.51444025  | -1.77411612 |
| H | -2.36357626 | 1.57713998  | -5.03414836 |
| H | -2.21420219 | 0.62529892  | -3.53283525 |
| H | -0.95615709 | 0.52031599  | -4.77260934 |
| H | -0.67101627 | 3.60068525  | -5.39989838 |
| H | 0.66333191  | 2.45294025  | -5.15298837 |
| H | 0.56434280  | 3.92719635  | -4.16795029 |
| H | 5.44228251  | -0.96684270 | -2.58065117 |
| H | 3.78138740  | -1.30673583 | -3.09939022 |
| H | 4.24258445  | -1.56660182 | -1.41174709 |
| H | 3.82735015  | 2.47499046  | -3.02166921 |
| H | 3.64763223  | 1.05405034  | -4.06793329 |
| H | 5.25502532  | 1.50850048  | -3.45420924 |
| H | 6.62874849  | 0.47462749  | -1.38859809 |
| H | 7.82625253  | 1.39641764  | 0.57813407  |
| H | 6.57017937  | 2.54101465  | 2.38689220  |
| H | -1.37505037 | 4.26615825  | 1.09134311  |
| H | 2.80383304  | 2.91095843  | 2.36666620  |
| H | -4.43988460 | 4.29058905  | 1.31157212  |
| H | -3.30839051 | 4.12694211  | 2.66965623  |
| H | -3.38135743 | 2.86358901  | 1.41454713  |
| H | -3.29023467 | 6.67054233  | 0.86531609  |
| H | -1.54745555 | 6.72039342  | 0.53822406  |
| H | -2.14085657 | 6.35565334  | 2.17503119  |
| H | 3.91412523  | 1.33863638  | 3.96517933  |
| H | 3.60306810  | 2.92548248  | 4.73370939  |
| H | 5.23411225  | 2.49384956  | 4.21386434  |
| H | 5.26949011  | 4.71914773  | 2.74830623  |
| H | 3.62991096  | 5.06538565  | 3.33644828  |
| H | 3.95496799  | 4.99949366  | 1.59046415  |
| H | 4.58006671  | -5.11967007 | 0.01220402  |
| H | 4.71319273  | -5.34161707 | -2.45768017 |
| H | 2.83643754  | -4.56954314 | -3.88421728 |
| H | 1.54184939  | -3.80334817 | 1.82703416  |
| H | -3.52537015 | -1.42759433 | -1.71470011 |
| H | 4.56646759  | -3.28107393 | 1.79324916  |
| H | 3.46935548  | -2.97099498 | 3.15760826  |
| H | 3.27307441  | -2.06465793 | 1.64112615  |
| H | 2.12659060  | -6.26607232 | 1.86191217  |
| H | 2.69371859  | -5.40408920 | 3.31020628  |
| H | 3.84257870  | -5.84806018 | 2.03712118  |
| H | -6.00138447 | 0.38792965  | -1.84155212 |
| H | -4.66726836 | 0.35339673  | -3.01131421 |
| H | -4.36320737 | 0.87075879  | -1.34110608 |
| H | -5.07580315 | -3.33443957 | -2.26528215 |
| H | -5.04514023 | -2.11299648 | -3.55618925 |
| H | -6.42333332 | -2.19244558 | -2.44160216 |
| H | -7.04810543 | -1.15679254 | -0.36255801 |



|   |             |             |             |
|---|-------------|-------------|-------------|
| H | -7.64362044 | -1.60586961 | 2.00605218  |
| H | -5.88750029 | -2.23545855 | 3.64050430  |
| H | -0.30681281 | -2.96171623 | -2.56986618 |
| H | -2.20838299 | -2.35591631 | 2.78554223  |
| H | 1.87764734  | -2.56564506 | -4.68214933 |
| H | 1.23072021  | -1.37332800 | -3.50152624 |
| H | 0.20347917  | -1.98685312 | -4.81069335 |
| H | -0.94523777 | -4.20722837 | -4.60706233 |
| H | -0.49262866 | -5.36545942 | -3.33569023 |
| H | 0.63103240  | -5.01758433 | -4.66318333 |
| H | -3.23650518 | -0.59049724 | 4.22582535  |
| H | -2.43784004 | -1.87746729 | 5.17192842  |
| H | -4.20477618 | -1.82468640 | 5.06402641  |
| H | -3.14432291 | -4.68653455 | 2.74304623  |
| H | -4.24636802 | -4.27979259 | 4.07400234  |
| H | -2.48897088 | -4.29708848 | 4.34542235  |
| O | 0.53899306  | 0.01291705  | -1.65387710 |
| O | -0.81972517 | 1.97428311  | 0.16082803  |
| O | 0.57845420  | -2.07862610 | 0.57947006  |
| C | 0.49749694  | 1.71227218  | 4.26183335  |
| H | 1.55785902  | 1.87298726  | 4.42352336  |
| C | -0.10106602 | 0.49928405  | 4.85756140  |
| H | 0.42798306  | -0.02999196 | 5.64738944  |
| H | -1.18304310 | 0.40395897  | 4.87467840  |
| C | -0.30387718 | 2.65868120  | 3.45894129  |
| H | -0.65255417 | 2.10698414  | 2.55384722  |
| H | -1.21251127 | 2.98301016  | 3.98239433  |
| H | 0.27841381  | 3.52273830  | 3.13137526  |

### Oxo Complex with weakly adsorbed O<sub>2</sub> molecule to Oxo Peroxo Complex

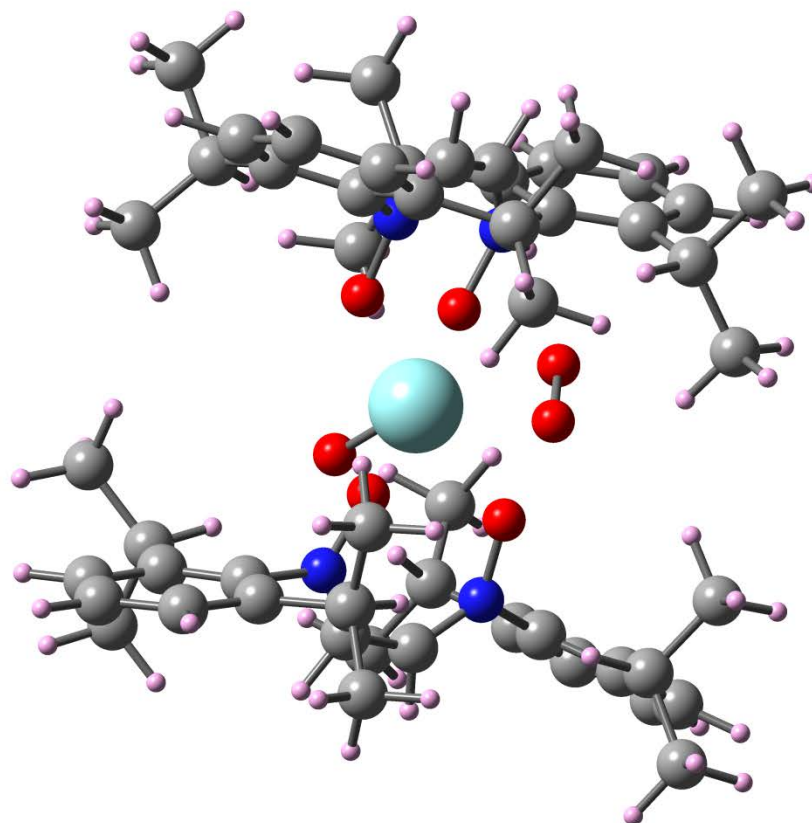

Fig. S167: ONCCNO Oxo Complex with weakly adsorbed O<sub>2</sub> molecule to Oxo Peroxo Complex

| SCF          | E <sub>ZP</sub> | H            | G            | imag freq (cm <sup>-1</sup> ) |
|--------------|-----------------|--------------|--------------|-------------------------------|
| -2816.595367 | -2815.438353    | -2815.365177 | -2815.554535 | -129                          |

|    |             |             |             |
|----|-------------|-------------|-------------|
| Zr | 0.03272346  | -0.02922794 | -0.23982875 |
| O  | 1.53965780  | 1.42954576  | -0.65008165 |
| O  | -1.67360994 | -1.37211737 | 0.24333776  |
| O  | -0.20619028 | -0.14550025 | 2.62426533  |
| O  | 0.66631756  | 0.68215524  | 2.00455349  |
| N  | 1.27625005  | -2.97003709 | 0.17980048  |
| N  | -1.95332505 | -2.55009835 | -0.35678311 |
| N  | -1.35545287 | 2.86446542  | 0.34703481  |
| N  | 1.92399411  | 2.66361598  | -0.17449539 |
| C  | 0.30774660  | -3.72856007 | -0.34991945 |
| C  | -1.08569892 | -3.54952084 | -0.57149057 |
| C  | -0.29911559 | 3.71108145  | 0.51285242  |
| C  | 1.07912419  | 3.62983055  | 0.28636814  |
| C  | 2.64084127  | -3.49743164 | 0.28624553  |
| C  | 3.47560626  | -3.43045700 | -0.85474252 |

|   |             |             |             |
|---|-------------|-------------|-------------|
| C | 4.78108441  | -3.95057012 | -0.71615408 |
| C | 5.22465502  | -4.47941372 | 0.50574474  |
| C | 4.37524700  | -4.49750424 | 1.62485819  |
| C | 3.05748677  | -4.00308006 | 1.54244670  |
| C | 3.95046493  | -1.64138003 | -2.59600299 |
| C | 3.02353340  | -2.81367704 | -2.18345787 |
| C | 2.95956674  | -3.88627122 | -3.30273498 |
| C | -3.08336685 | -1.10499111 | -4.10237536 |
| C | -2.64220735 | -2.29556382 | -3.21426736 |
| C | -2.36298800 | -3.54628677 | -4.09123753 |
| C | -3.35545091 | -2.72329071 | -0.75554352 |
| C | -3.68139156 | -2.61041169 | -2.13050349 |
| C | -5.03618781 | -2.80401873 | -2.47716389 |
| C | -6.00688373 | -3.06813429 | -1.49844429 |
| C | -5.64798599 | -3.14133977 | -0.14269760 |
| C | -4.30853641 | -2.96906818 | 0.26280382  |
| C | 2.59141128  | -2.82998965 | 3.73311015  |
| C | 2.15440210  | -3.97486239 | 2.77895455  |
| C | 2.11942822  | -5.33648601 | 3.51654456  |
| C | -4.50013822 | -1.77777906 | 2.48548104  |
| C | -3.93579941 | -3.02067061 | 1.74720608  |
| C | -4.40848588 | -4.33358591 | 2.42162239  |
| C | -2.69820121 | 3.27136553  | 0.73349300  |
| C | -3.05123130 | 3.27645637  | 2.10797355  |
| C | -4.35740029 | 3.69604311  | 2.44212978  |
| C | -5.27461996 | 4.07339027  | 1.44992479  |
| C | -4.90173379 | 4.04346320  | 0.09633810  |
| C | -3.60638365 | 3.64481838  | -0.29118864 |
| C | -2.66718665 | 1.72348270  | 4.09439854  |
| C | -2.08142763 | 2.86016312  | 3.21888522  |
| C | -1.68696077 | 4.07850867  | 4.09654323  |
| C | 2.99177045  | 2.24898379  | -3.77713923 |
| C | 2.83261662  | 3.46699233  | -2.82717127 |
| C | 3.01225984  | 4.80140463  | -3.59310532 |
| C | 3.34298111  | 2.94003901  | -0.35211940 |
| C | 3.78911734  | 3.34200459  | -1.63791372 |
| C | 5.16835720  | 3.58646789  | -1.79904959 |
| C | 6.05922502  | 3.43694761  | -0.72298195 |
| C | 5.58895409  | 3.02729252  | 0.53390225  |
| C | 4.21897275  | 2.75883773  | 0.74611252  |
| C | -4.08215574 | 2.61352587  | -2.55823367 |
| C | -3.22066399 | 3.63514651  | -1.77260717 |
| C | -3.32916569 | 5.05128360  | -2.39593972 |
| C | 4.38800319  | 0.91718719  | 2.48650915  |
| C | 3.73544589  | 2.27421321  | 2.11552321  |
| C | 3.99909620  | 3.33448386  | 3.21664624  |
| H | 0.67408316  | -4.69718340 | -0.67173416 |
| H | -1.56009976 | -4.41322608 | -1.02327760 |
| H | -0.61346459 | 4.65902391  | 0.93724074  |
| H | 1.61756745  | 4.53492195  | 0.54765674  |
| H | 5.45623369  | -3.92664786 | -1.56725474 |
| H | 6.23676076  | -4.86832237 | 0.59032630  |

|   |             |             |             |
|---|-------------|-------------|-------------|
| H | 4.73903318  | -4.89564903 | 2.56803876  |
| H | 2.02142641  | -2.38473474 | -2.07249792 |
| H | -1.70003051 | -1.98990824 | -2.74499994 |
| H | 4.98227413  | -1.97539105 | -2.77122878 |
| H | 3.96372030  | -0.86279161 | -1.82451633 |
| H | 3.57750527  | -1.18724821 | -3.52222108 |
| H | 3.94641655  | -4.32877105 | -3.49543144 |
| H | 2.60430536  | -3.43053117 | -4.23559250 |
| H | 2.27209509  | -4.70275310 | -3.04223246 |
| H | -3.98336097 | -1.33455653 | -4.68936546 |
| H | -2.27697014 | -0.85640417 | -4.80345890 |
| H | -3.28411457 | -0.21569077 | -3.49511248 |
| H | -1.99993150 | -4.39296117 | -3.49275467 |
| H | -1.59704801 | -3.31243849 | -4.84156898 |
| H | -3.26860662 | -3.87536069 | -4.61917091 |
| H | -5.33317225 | -2.73220525 | -3.51982872 |
| H | -7.04490459 | -3.20794645 | -1.79113189 |
| H | -6.41255133 | -3.33393611 | 0.60502193  |
| H | 1.13061296  | -3.74424691 | 2.46264486  |
| H | -2.84566264 | -2.97198217 | 1.84024844  |
| H | 3.62054207  | -2.98232087 | 4.08617831  |
| H | 1.92988680  | -2.79371015 | 4.60846132  |
| H | 2.53301078  | -1.86278208 | 3.22377214  |
| H | 3.09738567  | -5.59414268 | 3.94323344  |
| H | 1.81918793  | -6.15175765 | 2.84517493  |
| H | 1.40110334  | -5.29322990 | 4.34537619  |
| H | -4.12344533 | -0.85629193 | 2.02881654  |
| H | -4.19216228 | -1.79113772 | 3.53914646  |
| H | -5.59785110 | -1.75893194 | 2.45099270  |
| H | -5.50301507 | -4.41702147 | 2.42615086  |
| H | -4.07062906 | -4.36027295 | 3.46578571  |
| H | -4.00581865 | -5.21717052 | 1.90913289  |
| H | -4.65905644 | 3.71576105  | 3.48620159  |
| H | -6.27757128 | 4.38794588  | 1.72963886  |
| H | -5.62016841 | 4.33727862  | -0.66502362 |
| H | -1.16794444 | 2.46841168  | 2.76311412  |
| H | 1.80472211  | 3.43836909  | -2.44943703 |
| H | -3.57456591 | 2.04404166  | 4.62420273  |
| H | -1.92738256 | 1.41138891  | 4.84183712  |
| H | -2.91228462 | 0.84736071  | 3.48412541  |
| H | -1.23288400 | 4.87815452  | 3.49631160  |
| H | -0.96058701 | 3.77398584  | 4.86117592  |
| H | -2.56197493 | 4.50051528  | 4.60892733  |
| H | 4.01490058  | 2.18686878  | -4.17359542 |
| H | 2.30069433  | 2.33889767  | -4.62597988 |
| H | 2.76048507  | 1.31993998  | -3.24645119 |
| H | 2.90158886  | 5.66632960  | -2.92599207 |
| H | 2.25629372  | 4.88157819  | -4.38539567 |
| H | 3.99776200  | 4.86884276  | -4.07237310 |
| H | 5.54750105  | 3.89570157  | -2.76937932 |
| H | 7.11926755  | 3.63405620  | -0.86692834 |
| H | 6.29004860  | 2.90498363  | 1.35564124  |

|   |             |             |             |
|---|-------------|-------------|-------------|
| H | -2.18093528 | 3.30673779  | -1.85940794 |
| H | 2.65643800  | 2.10053622  | 2.07164933  |
| H | -5.14623094 | 2.88591292  | -2.54005586 |
| H | -3.97649895 | 1.61215329  | -2.12609182 |
| H | -3.76098290 | 2.57305364  | -3.60760080 |
| H | -3.00085886 | 5.02864253  | -3.44364917 |
| H | -2.70162441 | 5.77330659  | -1.85737828 |
| H | -4.36214551 | 5.42368886  | -2.37706847 |
| H | 4.16306730  | 0.15704924  | 1.72937114  |
| H | 3.99429220  | 0.56336034  | 3.44814648  |
| H | 5.47965444  | 1.00277240  | 2.57605906  |
| H | 3.51551650  | 4.29058111  | 2.97612514  |
| H | 5.07326072  | 3.52499915  | 3.34496666  |
| H | 3.60190159  | 2.98522395  | 4.17862783  |
| O | 0.14934987  | -0.84182680 | -1.87367336 |
| O | 1.11782678  | -1.72978666 | 0.69329172  |
| O | -1.28702631 | 1.64457545  | -0.30802796 |

### Transition State for Forming the Octahedral Complex with Transferred Allylic H from the Adsorbed PO Octahedral Complex

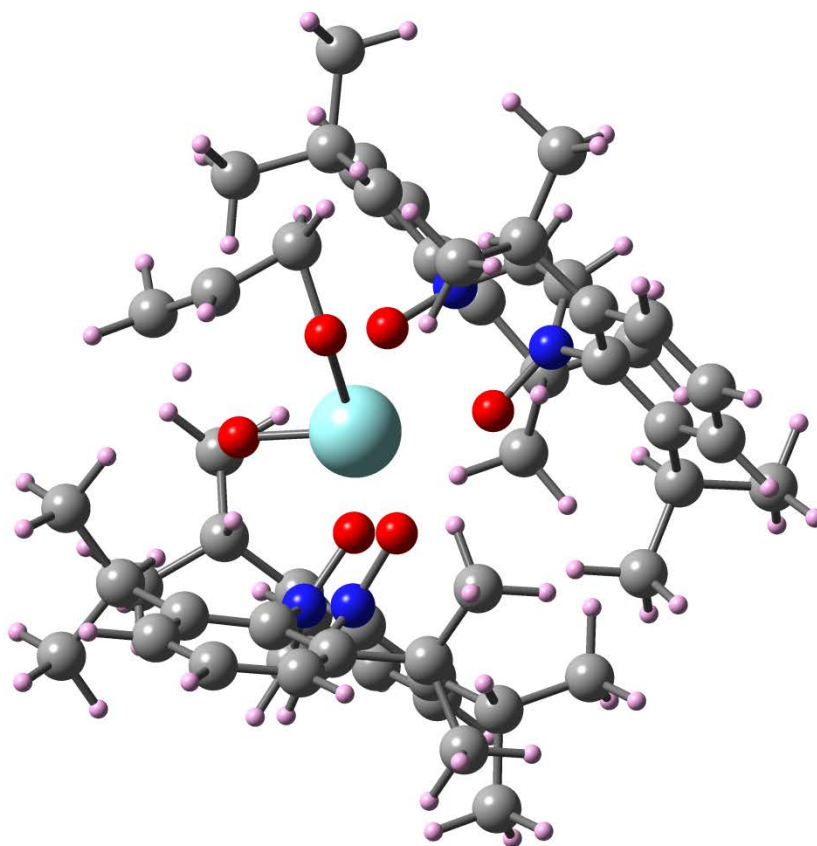

Fig. S168: ONCCNO Transition State for Forming the Octahedral Complex with Transferred Allylic H from the Adsorbed PO Octahedral Complex

| SCF          | E <sub>ZP</sub> | H            | G            | imag freq (cm <sup>-1</sup> ) |
|--------------|-----------------|--------------|--------------|-------------------------------|
| -2859.350637 | -2858.115434    | -2858.039771 | -2858.234248 | -526                          |
| O            | 0.40388986      | -1.32701345  | 0.78825410   |                               |
| O            | 1.75955328      | 0.85977494   | -1.13290121  |                               |
| O            | -0.00159073     | -1.33379737  | -2.18685951  |                               |
| N            | 0.04929435      | 2.97422590   | 0.78887248   |                               |
| N            | 2.71835181      | 1.67057316   | -0.54109707  |                               |
| N            | -2.78531625     | -1.80316915  | -0.18340551  |                               |
| N            | 0.21035990      | -2.69022382  | 0.93179327   |                               |
| C            | 1.30685766      | 3.46412471   | 0.57930046   |                               |
| C            | 2.46084849      | 2.87087870   | 0.06146331   |                               |
| C            | -2.24370301     | -2.96013091  | 0.29323260   |                               |
| C            | -0.97589221     | -3.33627363  | 0.74837915   |                               |
| C            | -0.97704744     | 3.79413261   | 1.41717945   |                               |
| C            | -1.70330254     | 4.72459025   | 0.63400919   |                               |
| C            | -2.68683969     | 5.50088349   | 1.28470099   |                               |

|   |             |             |             |
|---|-------------|-------------|-------------|
| C | -2.94823819 | 5.33756130  | 2.65305888  |
| C | -2.22926878 | 4.38996495  | 3.40047880  |
| C | -1.22758793 | 3.59989482  | 2.80124874  |
| C | -2.76321637 | 4.56057076  | -1.66783846 |
| C | -1.47562748 | 4.89638622  | -0.87067463 |
| C | -0.96631766 | 6.32276016  | -1.20644339 |
| C | 3.41584020  | 0.76669710  | -4.24751606 |
| C | 3.77737891  | 1.91613401  | -3.27005862 |
| C | 4.48569272  | 3.07878639  | -4.01087688 |
| C | 4.09022588  | 1.25864029  | -0.79109438 |
| C | 4.61295698  | 1.37922634  | -2.10589266 |
| C | 5.94566269  | 0.97577388  | -2.32467970 |
| C | 6.73415071  | 0.48401371  | -1.27194185 |
| C | 6.19549563  | 0.37510670  | 0.01858417  |
| C | 4.85960150  | 0.74499828  | 0.28576826  |
| C | -1.39500730 | 1.34047273  | 3.92376249  |
| C | -0.47329395 | 2.55338454  | 3.62568831  |
| C | 0.11294974  | 3.14514748  | 4.93199898  |
| C | 4.53601435  | -0.83075019 | 2.26771364  |
| C | 4.29755388  | 0.59155912  | 1.70249987  |
| C | 4.89709015  | 1.66213380  | 2.65468830  |
| C | -4.17241531 | -1.75576179 | -0.61503700 |
| C | -4.52379154 | -2.32573691 | -1.86611706 |
| C | -5.88572273 | -2.29311202 | -2.23669585 |
| C | -6.84649916 | -1.68694957 | -1.41271057 |
| C | -6.46377934 | -1.10016245 | -0.19560402 |
| C | -5.12058054 | -1.12617821 | 0.23273211  |
| C | -3.59827527 | -2.38971271 | -4.24073157 |
| C | -3.48942938 | -2.95964515 | -2.80349778 |
| C | -3.63183384 | -4.50555288 | -2.83159202 |
| C | 1.28423853  | -1.87559379 | 4.75889549  |
| C | 0.56618075  | -2.88848590 | 3.83101430  |
| C | -0.17406691 | -3.96915396 | 4.66302292  |
| C | 1.36696764  | -3.41625483 | 1.43336541  |
| C | 1.54107905  | -3.52582356 | 2.83606180  |
| C | 2.65296299  | -4.25973262 | 3.29961002  |
| C | 3.55611659  | -4.84542021 | 2.39744234  |
| C | 3.36859519  | -4.70197480 | 1.01325438  |
| C | 2.27165673  | -3.97799658 | 0.49772395  |
| C | -4.80860835 | 1.07143815  | 1.44578789  |
| C | -4.72241970 | -0.47374346 | 1.55887574  |
| C | -5.57375311 | -0.99569050 | 2.74411581  |
| C | 3.32693361  | -3.24180638 | -1.70275537 |
| C | 2.07360964  | -3.83761468 | -1.01410422 |
| C | 1.69529767  | -5.20369487 | -1.64677343 |
| H | 1.42556694  | 4.48855852  | 0.91643529  |
| H | 3.35813425  | 3.47390610  | 0.16647173  |
| H | -2.96280127 | -3.77235630 | 0.28524900  |
| H | -0.90102635 | -4.38729535 | 1.00842902  |
| H | -3.25847549 | 6.22767606  | 0.71279313  |
| H | -3.71388883 | 5.94136259  | 3.13491886  |
| H | -2.44550829 | 4.26660504  | 4.45846845  |

|   |             |             |             |
|---|-------------|-------------|-------------|
| H | -0.70733402 | 4.18250471  | -1.18479624 |
| H | 2.83852463  | 2.30390053  | -2.86072157 |
| H | -3.60112181 | 5.20526966  | -1.37287312 |
| H | -3.05530271 | 3.51678837  | -1.50572429 |
| H | -2.59529877 | 4.70943996  | -2.74398206 |
| H | -1.70633693 | 7.08642543  | -0.93312519 |
| H | -0.77075268 | 6.41707140  | -2.28326583 |
| H | -0.03616060 | 6.55167621  | -0.67021742 |
| H | 4.32030494  | 0.31216660  | -4.67374771 |
| H | 2.80966942  | 1.14883509  | -5.08147228 |
| H | 2.84864876  | -0.01236358 | -3.72679990 |
| H | 4.73991257  | 3.89576311  | -3.32320025 |
| H | 3.82970895  | 3.48228652  | -4.79422150 |
| H | 5.41245480  | 2.74745508  | -4.49684419 |
| H | 6.37177536  | 1.05440676  | -3.32167748 |
| H | 7.76278021  | 0.18361146  | -1.45805842 |
| H | 6.81182678  | -0.01520774 | 0.82394387  |
| H | 0.35942082  | 2.17375238  | 3.02527030  |
| H | 3.21422087  | 0.74508736  | 1.66117965  |
| H | -2.26839190 | 1.64288894  | 4.51874298  |
| H | -0.84356198 | 0.57771489  | 4.48973729  |
| H | -1.74048004 | 0.89051176  | 2.98721313  |
| H | -0.67502204 | 3.48018426  | 5.61953366  |
| H | 0.76787545  | 4.00208561  | 4.72667201  |
| H | 0.70359015  | 2.38171900  | 5.45570938  |
| H | 4.10825942  | -1.59642235 | 1.61158919  |
| H | 4.06034240  | -0.92716260 | 3.25183094  |
| H | 5.60540415  | -1.04562323 | 2.39528175  |
| H | 5.98606738  | 1.54680022  | 2.74068790  |
| H | 4.46589773  | 1.56283008  | 3.65978712  |
| H | 4.69372467  | 2.67959672  | 2.29722343  |
| H | -6.19335722 | -2.73234325 | -3.18223301 |
| H | -7.88962420 | -1.66691581 | -1.72050992 |
| H | -7.21486871 | -0.62562591 | 0.43063218  |
| H | -2.48577108 | -2.71658856 | -2.43819847 |
| H | -0.18470874 | -2.32729236 | 3.26545328  |
| H | -4.55012597 | -2.65778097 | -4.71777317 |
| H | -2.78823225 | -2.79295841 | -4.86211842 |
| H | -3.51729369 | -1.29578497 | -4.23518246 |
| H | -3.51905470 | -4.93995998 | -1.83027060 |
| H | -2.86251904 | -4.94649774 | -3.47906709 |
| H | -4.61559550 | -4.80500801 | -3.21819313 |
| H | 2.06189045  | -2.36088475 | 5.36346193  |
| H | 0.56240978  | -1.41671420 | 5.44803218  |
| H | 1.75226525  | -1.07757094 | 4.17094146  |
| H | -0.71983122 | -4.66651561 | 4.01462250  |
| H | -0.89720397 | -3.49833369 | 5.34220896  |
| H | 0.52721790  | -4.55575953 | 5.27128412  |
| H | 2.81421164  | -4.37220266 | 4.36910348  |
| H | 4.40727194  | -5.40921962 | 2.77303103  |
| H | 4.07986548  | -5.15267621 | 0.32576962  |
| H | -3.67541973 | -0.71817975 | 1.76293244  |



|    |             |             |             |
|----|-------------|-------------|-------------|
| H  | 1.25133199  | -3.14240154 | -1.21148383 |
| H  | -5.83517889 | 1.39816699  | 1.22881230  |
| H  | -4.14930492 | 1.43159271  | 0.64901565  |
| H  | -4.49270683 | 1.54126976  | 2.38635168  |
| H  | -5.21457770 | -0.55628570 | 3.68425517  |
| H  | -5.51148858 | -2.08828881 | 2.83193661  |
| H  | -6.63284941 | -0.72580620 | 2.63660575  |
| H  | 3.57980082  | -2.26377538 | -1.27702652 |
| H  | 3.12396836  | -3.09865170 | -2.77159188 |
| H  | 4.20301405  | -3.89867471 | -1.60824924 |
| H  | 0.78197018  | -5.61396105 | -1.19569838 |
| H  | 2.49741302  | -5.94416062 | -1.51900000 |
| H  | 1.51419203  | -5.07934242 | -2.72234892 |
| O  | -0.98833249 | 1.40813390  | -2.30198844 |
| O  | -2.13779391 | -0.57835330 | -0.18422709 |
| O  | -0.26730085 | 1.65136363  | 0.64701967  |
| Zr | -0.16946113 | -0.03428508 | -0.83865690 |
| C  | -0.46628997 | 2.14844635  | -3.45225195 |
| H  | -0.89960484 | 3.14610733  | -3.54603809 |
| C  | -1.16322179 | 1.02019040  | -4.12173452 |
| H  | -2.24121670 | 1.13046828  | -4.21426543 |
| C  | -0.50739553 | -0.19323356 | -4.56925632 |
| H  | -0.27868972 | -0.84498753 | -3.58618983 |
| H  | -1.13974214 | -0.81652877 | -5.20580080 |
| H  | 0.48613113  | -0.02781176 | -4.99974715 |
| H  | 0.62438309  | 2.14986173  | -3.50982774 |

### 13. Ground State with Isopropyl Groups Replaced by H Atoms

#### NCCN Bisperoxo Complex

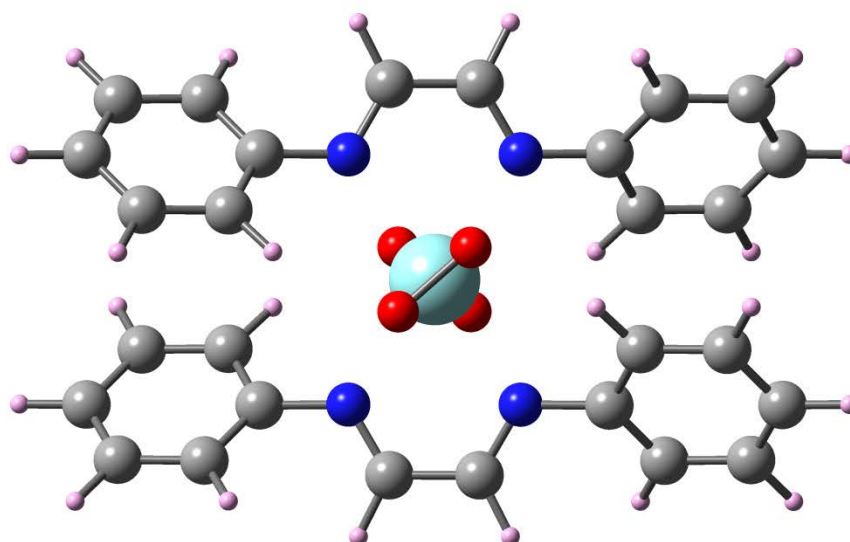

Fig. S169: NCCN Bisperoxo Complex

| SCF          | $E_{ZP}$     | H            | G            |
|--------------|--------------|--------------|--------------|
| -1647.703204 | -1647.235390 | -1647.201535 | -1647.301497 |

|    |             |             |             |
|----|-------------|-------------|-------------|
| Zr | 0.00136514  | -0.00001783 | 0.00004505  |
| O  | -0.57572846 | 0.51008626  | -1.94817790 |
| O  | 0.57498123  | -0.50660102 | -1.95055897 |
| O  | 0.57490489  | 0.50638357  | 1.95069114  |
| O  | -0.57591880 | -0.51011324 | 1.94817759  |
| N  | -1.36586723 | -1.98266952 | -0.30880050 |
| N  | 1.36551270  | -1.98407042 | 0.30622596  |
| N  | 1.36572705  | 1.98395972  | -0.30627737 |
| N  | -1.36569516 | 1.98272220  | 0.30867471  |
| C  | -0.71552010 | -3.10186553 | -0.15354083 |
| C  | 0.71405955  | -3.10260036 | 0.15041408  |
| C  | 0.71432215  | 3.10252265  | -0.15046373 |
| C  | -0.71525515 | 3.10187610  | 0.15345676  |
| C  | -2.77206438 | -1.99299722 | -0.58519101 |

|   |             |             |             |
|---|-------------|-------------|-------------|
| C | -3.64782240 | -2.86824595 | 0.09950613  |
| C | -5.01937213 | -2.85471467 | -0.20307466 |
| C | -5.51742224 | -1.98068873 | -1.19023050 |
| C | -4.63873273 | -1.10746408 | -1.86263118 |
| C | -3.26795207 | -1.09717263 | -1.55859345 |
| C | 2.77173859  | -1.99622356 | 0.58309998  |
| C | 3.26823872  | -1.10173004 | 1.55739345  |
| C | 4.63891432  | -1.11383026 | 1.86189458  |
| C | 5.51683623  | -1.98748458 | 1.18906137  |
| C | 5.01816655  | -2.86013907 | 0.20100276  |
| C | 3.64671495  | -2.87184348 | -0.10209376 |
| C | 2.77197066  | 1.99607826  | -0.58308499 |
| C | 3.26844434  | 1.10188722  | -1.55767434 |
| C | 4.63912435  | 1.11402075  | -1.86215742 |
| C | 5.51708743  | 1.98739937  | -1.18902310 |
| C | 5.01844817  | 2.85976511  | -0.20069388 |
| C | 3.64699113  | 2.87145949  | 0.10236980  |
| C | -2.77187570 | 1.99313602  | 0.58511244  |
| C | -3.26781984 | 1.09705312  | 1.55824763  |
| C | -4.63858522 | 1.10738831  | 1.86234663  |
| C | -5.51721041 | 1.98092566  | 1.19026925  |
| C | -5.01911187 | 2.85521065  | 0.20336435  |
| C | -3.64757847 | 2.86868122  | -0.09928370 |
| H | -1.20581132 | -4.07099370 | -0.27009253 |
| H | 1.20350411  | -4.07216716 | 0.26669286  |
| H | 1.20379874  | 4.07206823  | -0.26678699 |
| H | -1.20547788 | 4.07103429  | 0.27003043  |
| H | -5.69648672 | -3.51412372 | 0.33442909  |
| H | -6.57933276 | -1.97372075 | -1.42411382 |
| H | -5.02053216 | -0.42988624 | -2.62195502 |
| H | 5.02126260  | -0.43731866 | 2.62189276  |
| H | 6.57867224  | -1.98186104 | 1.42331596  |
| H | 5.69474472  | -3.51987726 | -0.33676657 |
| H | 5.02142915  | 0.43780533  | -2.62244081 |
| H | 6.57892312  | 1.98181843  | -1.42328140 |
| H | 5.69505688  | 3.51927944  | 0.33731195  |
| H | -5.02042713 | 0.42958353  | 2.62144660  |
| H | -6.57911183 | 1.97398783  | 1.42419352  |
| H | -5.69617964 | 3.51486482  | -0.33389693 |
| H | -2.56319257 | -0.44000131 | -2.06496913 |
| H | -3.26723230 | -3.51220926 | 0.88886514  |
| H | 2.56424009  | 0.44469135  | -2.06479514 |
| H | 3.26589341  | 3.51412371  | 0.89254054  |
| H | -2.56312697 | 0.43959821  | 2.06434815  |
| H | -3.26695941 | 3.51284610  | -0.88846437 |
| H | 3.26556663  | -3.51474642 | -0.89204615 |
| H | 2.56411455  | -0.44414388 | 2.06410931  |

## 14. Transition State with Isopropyl Groups Replaced by H Atoms

### NCCN Bisperoxo Complex to Oxo Peroxo Complex

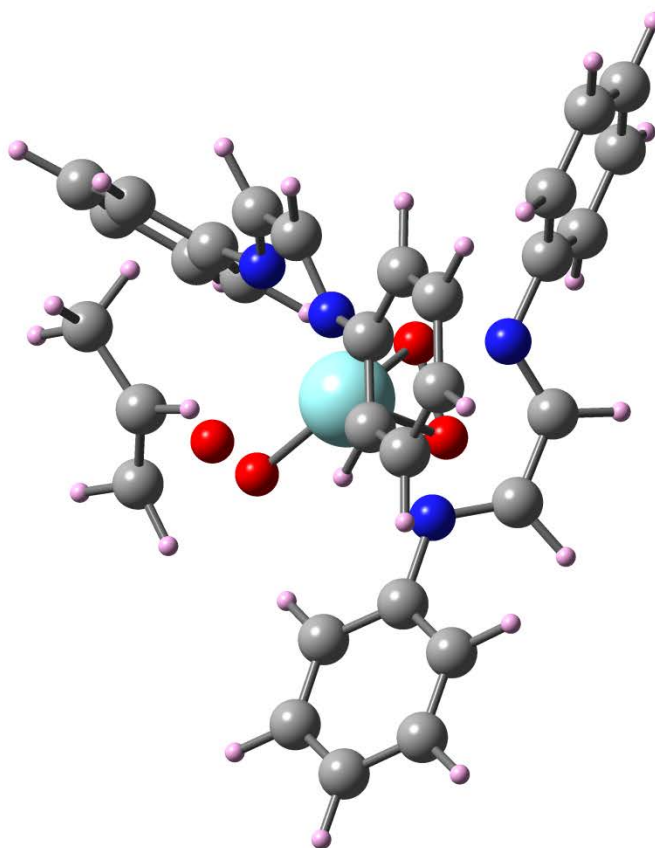

Fig. S170: NCCN Bisperoxo Complex to Oxo Peroxo Complex

| SCF          | E <sub>ZP</sub> | H            | G            | imag freq (cm <sup>-1</sup> ) |
|--------------|-----------------|--------------|--------------|-------------------------------|
| -1765.542977 | -1764.995526    | -1764.956349 | -1765.069641 | -460                          |

|    |             |             |             |
|----|-------------|-------------|-------------|
| Zr | -0.25864003 | -0.52045117 | -0.67285859 |
| O  | -0.20897244 | -2.42739703 | -1.05014804 |
| N  | 0.06550936  | 2.11805338  | -1.02973216 |
| N  | 1.94099725  | -0.02755768 | -1.49344359 |
| N  | -2.23224252 | -0.71218942 | 0.67591930  |
| N  | 0.11311482  | 0.55665700  | 1.54747396  |
| C  | 0.82460316  | 2.05584230  | -2.09485372 |
| C  | 1.90802876  | 1.07329732  | -2.20474404 |
| C  | -2.19764453 | -0.06050717 | 1.81880463  |
| C  | -1.00304410 | 0.63568021  | 2.24307530  |
| C  | -0.93394924 | 3.14063494  | -0.93507845 |
| C  | -1.89236599 | 3.33851994  | -1.95706544 |
| C  | -2.85203716 | 4.35581995  | -1.82567897 |

|   |             |             |             |
|---|-------------|-------------|-------------|
| C | -2.86747196 | 5.18468867  | -0.68524184 |
| C | -1.91634480 | 4.98155458  | 0.33341883  |
| C | -0.95716741 | 3.95972108  | 0.21434822  |
| C | 3.09499341  | -0.88203081 | -1.54581598 |
| C | 2.91299996  | -2.28283546 | -1.53461143 |
| C | 4.03645246  | -3.12351314 | -1.60871611 |
| C | 5.33778630  | -2.58573623 | -1.67349816 |
| C | 5.51612560  | -1.18819637 | -1.65967073 |
| C | 4.40075825  | -0.33608239 | -1.59371674 |
| C | -3.34598332 | -1.55537561 | 0.36162828  |
| C | -4.06717618 | -2.22228597 | 1.38667198  |
| C | -5.14902419 | -3.05270094 | 1.06094540  |
| C | -5.52456984 | -3.23086618 | -0.28662455 |
| C | -4.79658591 | -2.58352580 | -1.30333235 |
| C | -3.70521005 | -1.75761906 | -0.99103338 |
| C | 1.28708184  | 1.24373360  | 2.00532131  |
| C | 1.22766043  | 2.41130023  | 2.80661633  |
| C | 2.40899327  | 3.03903132  | 3.23354965  |
| C | 3.66565170  | 2.51837679  | 2.86789212  |
| C | 3.72728831  | 1.36113353  | 2.06674222  |
| C | 2.54993829  | 0.73113098  | 1.63614624  |
| H | 0.75320807  | 2.78616388  | -2.90528124 |
| H | 2.69675967  | 1.29401089  | -2.92838591 |
| H | -3.05858891 | -0.03042995 | 2.48741272  |
| H | -1.05407926 | 1.16532050  | 3.19549610  |
| H | -3.59613790 | 4.49250250  | -2.60687297 |
| H | -3.61284755 | 5.97062885  | -0.58969180 |
| H | -1.91779264 | 5.61933305  | 1.21483279  |
| H | 3.89226671  | -4.20096593 | -1.61946624 |
| H | 6.20072739  | -3.24512227 | -1.72575620 |
| H | 6.51725884  | -0.76481159 | -1.69095127 |
| H | -5.68492584 | -3.57423761 | 1.85038514  |
| H | -6.36093586 | -3.87850790 | -0.53840661 |
| H | -5.07051466 | -2.72686621 | -2.34523822 |
| H | 2.34820198  | 3.93858391  | 3.84124027  |
| H | 4.57830435  | 3.00721722  | 3.19868558  |
| H | 4.68949694  | 0.94315101  | 1.78193521  |
| O | -0.45995353 | -0.02611024 | -2.76811138 |
| O | -1.70387800 | 0.23118063  | -1.97533611 |
| C | 1.01152854  | -2.27259808 | 2.88004328  |
| H | 1.67043776  | -1.42794786 | 3.06449356  |
| C | 1.28942451  | -3.11867594 | 1.78241313  |
| H | 2.28673863  | -3.09199984 | 1.34421972  |
| O | 0.32560232  | -2.23853233 | 0.68781465  |
| H | 0.80704231  | -4.09418937 | 1.73730131  |
| C | -0.20327607 | -2.40442271 | 3.74401256  |
| H | -0.90338351 | -1.56031382 | 3.57410083  |
| H | -0.74953590 | -3.33115730 | 3.53319897  |
| H | 0.05207408  | -2.37843612 | 4.81464371  |
| H | 0.26954468  | 2.84528404  | 3.07970116  |
| H | 2.59990040  | -0.17113998 | 1.03926742  |
| H | -3.75251524 | -2.13748409 | 2.42370772  |

|   |             |             |             |
|---|-------------|-------------|-------------|
| H | -3.14260810 | -1.24801867 | -1.76720664 |
| H | -0.20573567 | 3.80886137  | 0.98232946  |
| H | -1.91121452 | 2.65310870  | -2.79880608 |
| H | 4.54282798  | 0.74157936  | -1.54845713 |
| H | 1.90280335  | -2.68490265 | -1.49104867 |

## 15. Molecules and Ligands

O<sub>2</sub> Triplet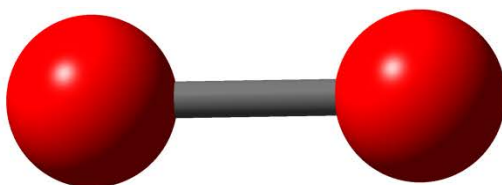Fig. S171: O<sub>2</sub> Triplet

| SCF          | E <sub>ZP</sub> | H           | G           |
|--------------|-----------------|-------------|-------------|
| -150.3147399 | -150.311445     | -150.308134 | -150.331506 |

|   |            |            |             |
|---|------------|------------|-------------|
| O | 0.00000000 | 0.00000000 | 0.63422700  |
| O | 0.00000000 | 0.00000000 | -0.63422700 |

O<sub>2</sub> Singlet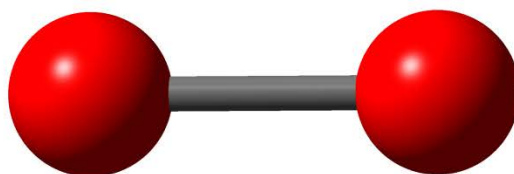Fig. S172: O<sub>2</sub> Singlet

| SCF          | E <sub>ZP</sub> | H           | G           |
|--------------|-----------------|-------------|-------------|
| -150.2522943 | -150.249039     | -150.245728 | -150.268067 |

|   |            |            |             |
|---|------------|------------|-------------|
| O | 0.00000000 | 0.00000000 | 0.63532800  |
| O | 0.00000000 | 0.00000000 | -0.63532800 |

**Ozone**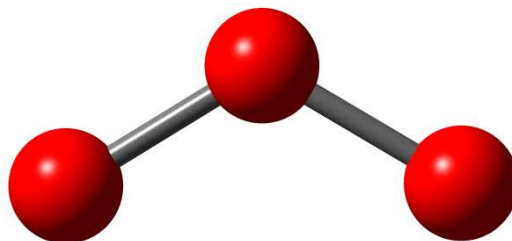

Fig. S173: Ozone

| SCF          | E <sub>ZP</sub> | H           | G           |
|--------------|-----------------|-------------|-------------|
| -225.3954689 | -225.389087     | -225.385114 | -225.412382 |

|   |            |             |             |
|---|------------|-------------|-------------|
| O | 0.00000000 | 0.00000000  | 0.45657800  |
| O | 0.00000000 | 1.13809000  | -0.22828900 |
| O | 0.00000000 | -1.13809000 | -0.22828900 |

**Propene**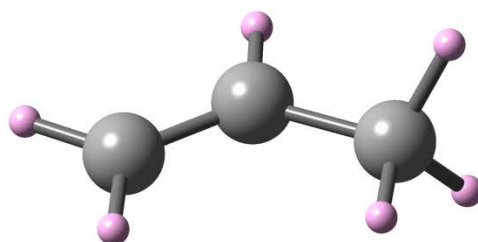

Fig. S174: Propene

| SCF          | E <sub>ZP</sub> | H           | G           |
|--------------|-----------------|-------------|-------------|
| -117.8913037 | -117.811106     | -117.806069 | -117.836174 |

|   |             |             |             |
|---|-------------|-------------|-------------|
| C | -0.13128000 | -0.45886400 | -0.00008400 |
| H | -0.16081500 | -1.55115200 | 0.00012700  |
| C | -1.29659400 | 0.22180900  | -0.00003600 |
| H | -2.25616100 | -0.29082800 | 0.00028100  |
| H | -1.32356100 | 1.31039200  | 0.00002500  |
| C | 1.24615100  | 0.16543900  | 0.00001300  |
| H | 1.19036600  | 1.26028600  | -0.00080800 |
| H | 1.81989200  | -0.14881100 | 0.88404800  |
| H | 1.82061800  | -0.15018800 | -0.88303300 |



**Propylene Oxide**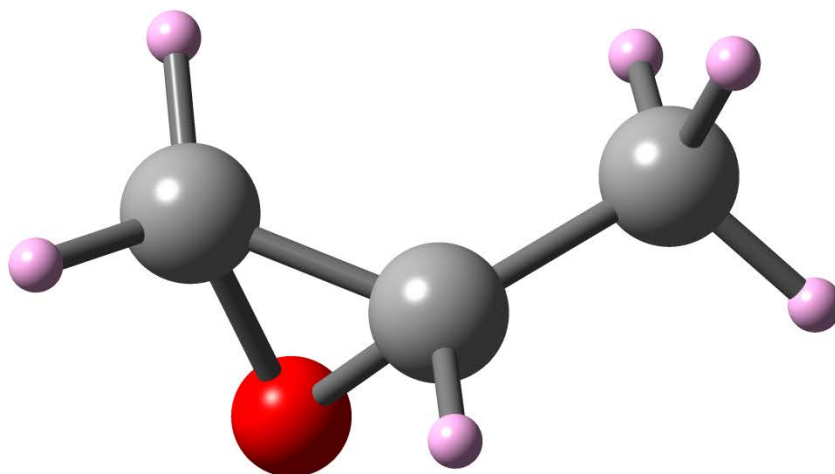

Fig. S175: Propylene Oxide

| <b>SCF</b>   | <b>E<sub>ZP</sub></b> | <b>H</b>    | <b>G</b>    |
|--------------|-----------------------|-------------|-------------|
| -193.0740751 | -192.988641           | -192.983202 | -193.015134 |

|   |             |             |             |
|---|-------------|-------------|-------------|
| C | 0.16847400  | -0.00532200 | 0.50100300  |
| H | 0.17015800  | -0.18410900 | 1.57652400  |
| C | -1.03954600 | 0.65225100  | -0.08081900 |
| H | -1.85786500 | 0.95938100  | 0.56752000  |
| H | -0.94344800 | 1.20490300  | -1.01412300 |
| C | 1.52675800  | 0.08205200  | -0.15864600 |
| H | 1.42298000  | 0.23317600  | -1.23919500 |
| H | 2.10446900  | 0.91909200  | 0.25726300  |
| H | 2.09638000  | -0.84154500 | 0.00242700  |
| O | -0.86584900 | -0.83309800 | -0.21495600 |

## NCCN Ligand

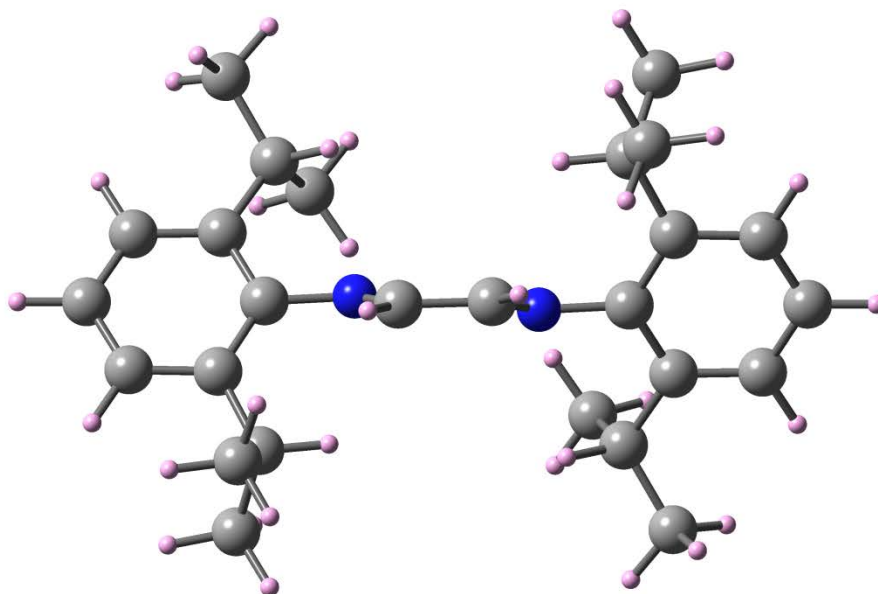

Fig. S176: NCCN Ligand

| SCF           | E <sub>ZP</sub> | H            | G            |
|---------------|-----------------|--------------|--------------|
| -1121.7493672 | -1121.184542    | -1121.153078 | -1121.248209 |

|   |             |             |             |
|---|-------------|-------------|-------------|
| N | 1.44881500  | 0.16072700  | -0.05964200 |
| N | -1.44881900 | -0.16078900 | -0.05970400 |
| C | 0.74080300  | 0.00836400  | -1.13150800 |
| C | -0.74077700 | -0.00832000 | -1.13153200 |
| C | 2.87547600  | 0.14308200  | -0.06412700 |
| C | 3.63484200  | -0.93754000 | -0.60580000 |
| C | 5.04370100  | -0.85956500 | -0.52479200 |
| C | 5.68464700  | 0.23713500  | 0.06416300  |
| C | 4.91927700  | 1.27798100  | 0.62333100  |
| C | 3.51546000  | 1.24498600  | 0.58797200  |
| C | 3.45319500  | -3.47175900 | -0.40794100 |
| C | 3.00657000  | -2.20956000 | -1.19263100 |
| C | 3.32374000  | -2.36313300 | -2.70369600 |
| C | -3.45314700 | 3.47172300  | -0.40790900 |
| C | -3.00655800 | 2.20954700  | -1.19266000 |
| C | -3.32377500 | 2.36317200  | -2.70370700 |
| C | -2.87546700 | -0.14310900 | -0.06417800 |
| C | -3.63483000 | 0.93752300  | -0.60583800 |
| C | -5.04368800 | 0.85958700  | -0.52477500 |
| C | -5.68464400 | -0.23709000 | 0.06420900  |
| C | -4.91928100 | -1.27795200 | 0.62335800  |
| C | -3.51546600 | -1.24499300 | 0.58795000  |
| C | 2.16184200  | 1.84809700  | 2.63365100  |
| C | 2.66696200  | 2.33920900  | 1.24762400  |

|   |             |             |             |
|---|-------------|-------------|-------------|
| C | 3.38981100  | 3.69852100  | 1.38180200  |
| C | -2.16184800 | -1.84811600 | 2.63361800  |
| C | -2.66698100 | -2.33922900 | 1.24759600  |
| C | -3.38985100 | -3.69852900 | 1.38177800  |
| H | 5.64312200  | -1.67249800 | -0.92810300 |
| H | 6.77067000  | 0.27937300  | 0.10018800  |
| H | 5.42503600  | 2.11793500  | 1.08908200  |
| H | 1.91787700  | -2.15124100 | -1.08951100 |
| H | -1.91786200 | 2.15121500  | -1.08958000 |
| H | 4.53459800  | -3.63882400 | -0.49047100 |
| H | 2.94633400  | -4.36315800 | -0.80181900 |
| H | 3.20712100  | -3.37929800 | 0.65704000  |
| H | 2.97490900  | -1.49474200 | -3.27799300 |
| H | 2.83963000  | -3.26174000 | -3.10937900 |
| H | 4.40405800  | -2.45820700 | -2.87362400 |
| H | -4.53455600 | 3.63877900  | -0.49037700 |
| H | -2.94631300 | 4.36313700  | -0.80178800 |
| H | -3.20701600 | 3.37922900  | 0.65705600  |
| H | -2.97498100 | 1.49479200  | -3.27804300 |
| H | -2.83965800 | 3.26178200  | -3.10937700 |
| H | -4.40409500 | 2.45827700  | -2.87360300 |
| H | -5.64310000 | 1.67253900  | -0.92806400 |
| H | -6.77066700 | -0.27929800 | 0.10027400  |
| H | -5.42504500 | -2.11788700 | 1.08914000  |
| H | 1.77777800  | 2.49711200  | 0.62433000  |
| H | -1.77780100 | -2.49714200 | 0.62430100  |
| H | 3.00783200  | 1.64834300  | 3.30530300  |
| H | 1.57348500  | 0.93163200  | 2.52324100  |
| H | 1.52625700  | 2.61231500  | 3.10160100  |
| H | 2.68559600  | 4.45585800  | 1.75022300  |
| H | 3.78946300  | 4.04430700  | 0.41931900  |
| H | 4.21949500  | 3.65181000  | 2.09998000  |
| H | -1.57347100 | -0.93166300 | 2.52319700  |
| H | -1.52627800 | -2.61234000 | 3.10157600  |
| H | -3.00783300 | -1.64833500 | 3.30527000  |
| H | -3.78952100 | -4.04430100 | 0.41929700  |
| H | -4.21952600 | -3.65180900 | 2.09996600  |
| H | -2.68564500 | -4.45588000 | 1.75018600  |
| H | 1.19642000  | -0.07981000 | -2.12956700 |
| H | -1.19636100 | 0.07998300  | -2.12959400 |

## NCCNO Ligand

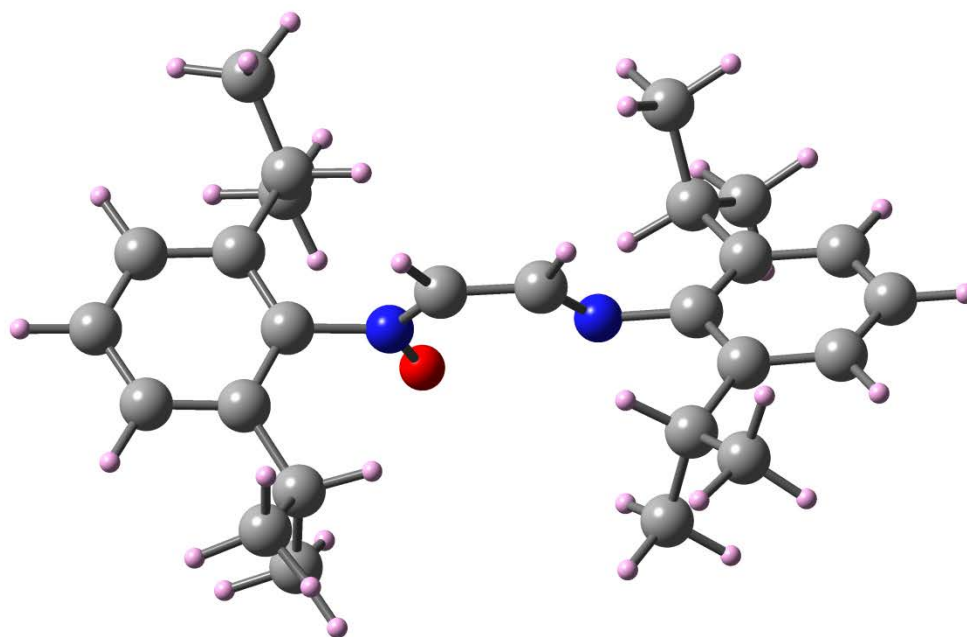

Fig. S177: NCCNO Ligand

| SCF           | E <sub>ZP</sub> | H            | G            |
|---------------|-----------------|--------------|--------------|
| -1196.9200136 | -1196.350300    | -1196.317905 | -1196.416154 |

|   |             |             |             |
|---|-------------|-------------|-------------|
| O | -1.03473700 | -0.26839900 | 1.33093300  |
| N | 1.57518500  | -0.05506400 | 0.04550200  |
| N | -1.43895300 | -0.03624500 | 0.09618600  |
| C | 0.80306600  | 0.13786600  | -0.98371200 |
| C | -0.64574400 | 0.14641200  | -0.96483700 |
| C | 2.99784200  | -0.01674200 | -0.07209400 |
| C | 3.70212000  | -1.21468700 | 0.24314000  |
| C | 5.10848200  | -1.20566800 | 0.17143200  |
| C | 5.80661700  | -0.03672700 | -0.17178900 |
| C | 5.09977200  | 1.14955400  | -0.43197300 |
| C | 3.69121300  | 1.19308300  | -0.38929800 |
| C | 3.61608100  | -3.34837500 | 1.67482200  |
| C | 2.92135300  | -2.48199400 | 0.59904500  |
| C | 2.63372000  | -3.32459200 | -0.67510200 |
| C | -2.90989000 | 2.71783100  | 2.04716600  |
| C | -2.78311500 | 2.52737400  | 0.50961100  |
| C | -3.23555500 | 3.79781200  | -0.24939300 |
| C | -2.90407000 | 0.02221800  | -0.09291000 |
| C | -3.54686700 | 1.26981000  | 0.08262700  |
| C | -4.94934100 | 1.29207300  | -0.07077400 |
| C | -5.66171600 | 0.11979100  | -0.37119600 |
| C | -4.98981000 | -1.10561300 | -0.51015400 |
| C | -3.58832700 | -1.18497300 | -0.36764700 |
| C | 2.50834400  | 3.03848700  | 0.86555100  |

|   |             |             |             |
|---|-------------|-------------|-------------|
| C | 2.93896500  | 2.52526500  | -0.53792200 |
| C | 3.73022000  | 3.61683900  | -1.29308000 |
| C | -2.98164600 | -3.24292600 | 0.95857300  |
| C | -2.86612000 | -2.53519000 | -0.42079100 |
| C | -3.37340400 | -3.45021900 | -1.56073000 |
| H | 5.66191100  | -2.11401700 | 0.39330600  |
| H | 6.89291800  | -0.04373800 | -0.22297000 |
| H | 5.65490500  | 2.05210500  | -0.66786200 |
| H | 1.95409800  | -2.15372600 | 1.00196500  |
| H | -1.71769100 | 2.38157000  | 0.29432100  |
| H | 4.54894200  | -3.79578100 | 1.30558000  |
| H | 2.95558200  | -4.17279000 | 1.97512400  |
| H | 3.85125500  | -2.75826600 | 2.56938200  |
| H | 2.08916100  | -2.73790700 | -1.42619200 |
| H | 2.02802700  | -4.20689900 | -0.42639700 |
| H | 3.57049600  | -3.67109500 | -1.13268800 |
| H | -3.95835900 | 2.86681100  | 2.33811700  |
| H | -2.33762600 | 3.59771800  | 2.36954400  |
| H | -2.52242400 | 1.84080400  | 2.57739100  |
| H | -3.16561500 | 3.66531600  | -1.33686700 |
| H | -2.59921000 | 4.64635600  | 0.03329100  |
| H | -4.27025700 | 4.07241700  | -0.00747700 |
| H | -5.48650000 | 2.22826800  | 0.05070100  |
| H | -6.74240200 | 0.15897800  | -0.48557400 |
| H | -5.55806400 | -2.00586200 | -0.72502500 |
| H | 2.01919800  | 2.35226800  | -1.11048900 |
| H | -1.79875100 | -2.35512600 | -0.59803500 |
| H | 3.39134600  | 3.23256900  | 1.48876600  |
| H | 1.88378400  | 2.29974900  | 1.38132800  |
| H | 1.93876600  | 3.97401400  | 0.77680400  |
| H | 3.08731900  | 4.49119400  | -1.45907500 |
| H | 4.08278900  | 3.26198500  | -2.27035500 |
| H | 4.60109100  | 3.95939200  | -0.71919200 |
| H | -2.55989000 | -2.61474300 | 1.75100600  |
| H | -2.43576000 | -4.19555300 | 0.94397300  |
| H | -4.03141200 | -3.45488600 | 1.20222200  |
| H | -3.32129700 | -2.94827300 | -2.53551800 |
| H | -4.41107500 | -3.76876200 | -1.39825100 |
| H | -2.75846100 | -4.35802600 | -1.61055800 |
| H | 1.21892900  | 0.30157300  | -1.99021900 |
| H | -1.16458400 | 0.31846400  | -1.90073600 |

## ONCCNO Ligand

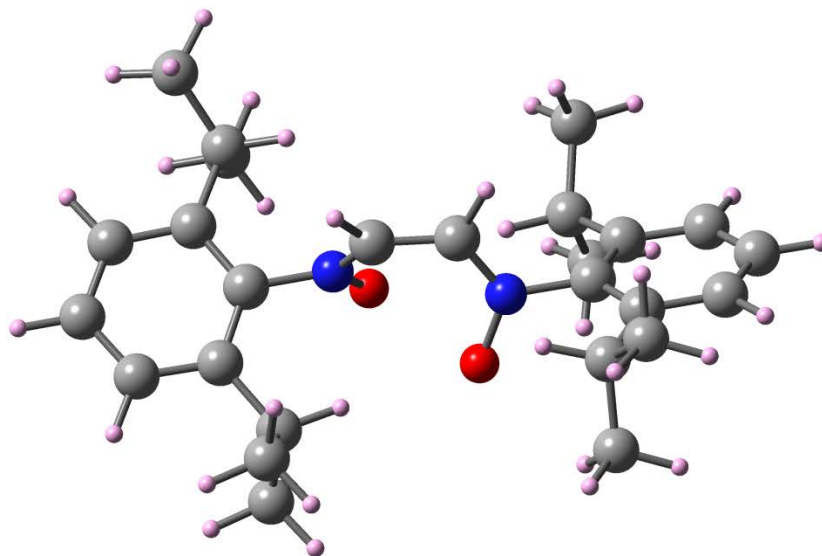

Fig. S178: ONCCNO Ligand

| SCF           | E <sub>ZP</sub> | H            | G            |
|---------------|-----------------|--------------|--------------|
| -1272.0941843 | -1271.519822    | -1271.486587 | -1271.585349 |

|   |             |             |             |
|---|-------------|-------------|-------------|
| O | 1.01339000  | 0.78755600  | 0.95164600  |
| N | -1.47638900 | -0.18912800 | -0.13860900 |
| N | 1.47648600  | 0.18916000  | -0.13849500 |
| C | -0.70881700 | 0.07596600  | -1.21062000 |
| C | 0.70894400  | -0.07554100 | -1.21061300 |
| C | -2.89282800 | 0.19984800  | -0.12968000 |
| C | -3.22266600 | 1.49592700  | 0.32900100  |
| C | -4.59113500 | 1.84330900  | 0.33520800  |
| C | -5.57063400 | 0.92870500  | -0.08188900 |
| C | -5.20676400 | -0.36353300 | -0.49800700 |
| C | -3.85444900 | -0.76217300 | -0.52369400 |
| C | -2.38872100 | 2.73982800  | 2.37004200  |
| C | -2.16973500 | 2.47588800  | 0.85617700  |
| C | -2.16857200 | 3.80172800  | 0.05329100  |
| C | 2.38835300  | -2.73917700 | 2.37020500  |
| C | 2.16963800  | -2.47577700 | 0.85622100  |
| C | 2.16858500  | -3.80194800 | 0.05386700  |
| C | 2.89291000  | -0.19987700 | -0.12970000 |
| C | 3.22266700  | -1.49599800 | 0.32891100  |
| C | 4.59111300  | -1.84346800 | 0.33502700  |
| C | 5.57063500  | -0.92892700 | -0.08216300 |
| C | 5.20684900  | 0.36336000  | -0.49821600 |
| C | 3.85457000  | 0.76212000  | -0.52370800 |
| C | -3.60368000 | -3.10883600 | 0.36644000  |
| C | -3.45939000 | -2.19745400 | -0.88471200 |
| C | -4.25607900 | -2.76748800 | -2.08243500 |

|   |             |             |             |
|---|-------------|-------------|-------------|
| C | 3.60371000  | 3.10871100  | 0.36663600  |
| C | 3.45937900  | 2.19739700  | -0.88458600 |
| C | 4.25602400  | 2.76760800  | -2.08223500 |
| H | -4.88943900 | 2.83120400  | 0.67642500  |
| H | -6.61934400 | 1.21665100  | -0.07103500 |
| H | -5.97910300 | -1.06541000 | -0.79905700 |
| H | -1.17743300 | 2.02308200  | 0.76049200  |
| H | 1.17734700  | -2.02300800 | 0.76020900  |
| H | -3.35960600 | 3.21608200  | 2.56317600  |
| H | -1.60258500 | 3.40399700  | 2.75182700  |
| H | -2.34500700 | 1.80209600  | 2.93599700  |
| H | -1.98510600 | 3.62251000  | -1.01434900 |
| H | -1.37924800 | 4.46682200  | 0.42731100  |
| H | -3.12519700 | 4.33333700  | 0.14586300  |
| H | 3.35925900  | -3.21527300 | 2.56366900  |
| H | 1.60220700  | -3.40330400 | 2.75205000  |
| H | 2.34443200  | -1.80129700 | 2.93589400  |
| H | 1.98518600  | -3.62317000 | -1.01385800 |
| H | 1.37925700  | -4.46690100 | 0.42811900  |
| H | 3.12521900  | -4.33348900 | 0.14673400  |
| H | 4.88939100  | -2.83138900 | 0.67618600  |
| H | 6.61932200  | -1.21696600 | -0.07144200 |
| H | 5.97923600  | 1.06516100  | -0.79932100 |
| H | -2.39831200 | -2.20585400 | -1.16368200 |
| H | 2.39829100  | 2.20572700  | -1.16351800 |
| H | -4.64702600 | -3.14050600 | 0.70815800  |
| H | -2.97992400 | -2.73588900 | 1.18623600  |
| H | -3.29081000 | -4.13459800 | 0.12913500  |
| H | -3.86297300 | -3.75567300 | -2.35462200 |
| H | -4.18397600 | -2.11591800 | -2.96297300 |
| H | -5.31930300 | -2.89598300 | -1.84210300 |
| H | 2.98043000  | 2.73538800  | 1.18662000  |
| H | 3.29027700  | 4.13434200  | 0.12952500  |
| H | 4.64717600  | 3.14085300  | 0.70794600  |
| H | 4.18377000  | 2.11626500  | -2.96292900 |
| H | 5.31927700  | 2.89588000  | -1.84191900 |
| H | 3.86302300  | 3.75590900  | -2.35415800 |
| O | -1.01326600 | -0.78790800 | 0.95130100  |
| H | -1.23121900 | 0.36183200  | -2.11650400 |
| H | 1.23140700  | -0.36110800 | -2.11655700 |

## 16. Calculations Using 6-311++G\*\* Basis Sets

### NCCN Bare Complex (puckered conformation)

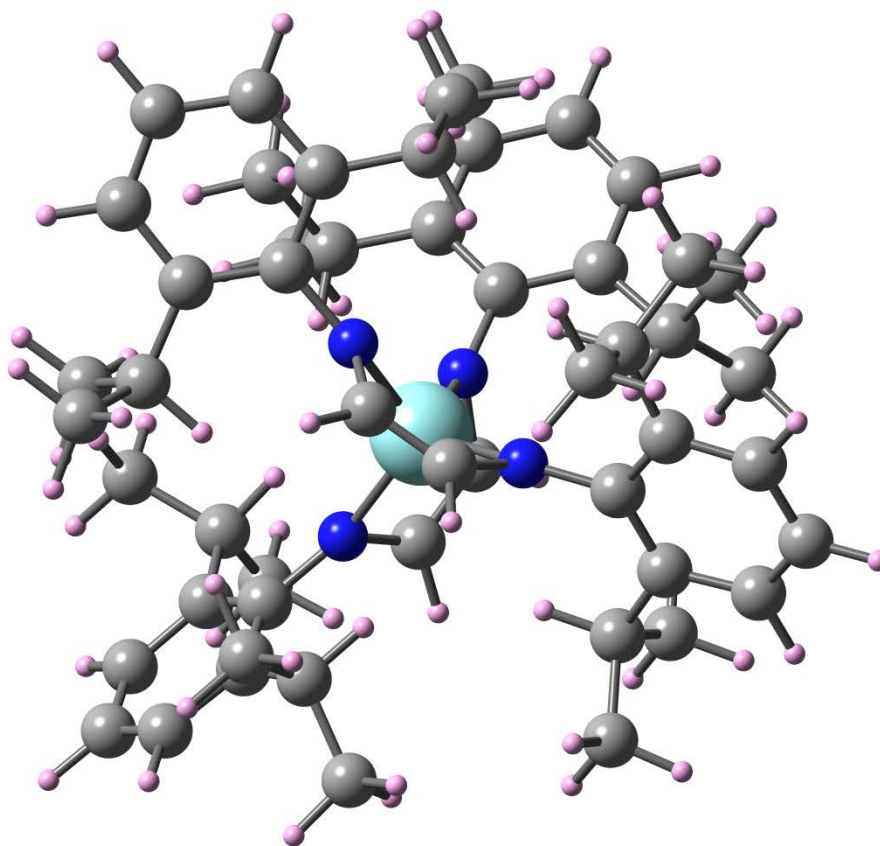

Fig. S179: NCCN Bare Complex (puckered conformation)

|                |
|----------------|
| <b>SCF</b>     |
| -2291.68050546 |

|    |             |             |             |
|----|-------------|-------------|-------------|
| Zr | 0.00067000  | -0.30748500 | -0.00049100 |
| N  | 1.79452400  | -1.26557500 | 0.64042000  |
| N  | 0.09357500  | 0.77262900  | 1.78900600  |
| N  | -0.09255300 | 0.77782000  | -1.78672400 |
| N  | -1.79641400 | -1.25978600 | -0.64123900 |
| C  | 1.31631500  | -1.32706800 | 1.95705300  |
| C  | 0.50746600  | -0.35823600 | 2.50885300  |
| C  | -0.50933400 | -0.35071700 | -2.50872200 |
| C  | -1.31937000 | -1.31931000 | -1.95832400 |
| C  | 3.01541700  | -1.93754100 | 0.32734100  |
| C  | 4.22317700  | -1.53677500 | 0.96251300  |
| C  | 5.40890900  | -2.20202700 | 0.64405700  |
| C  | 5.44383800  | -3.22109600 | -0.29814700 |
| C  | 4.26610600  | -3.59865600 | -0.92428600 |
| C  | 3.04279400  | -2.98901200 | -0.62429000 |



|   |             |             |             |
|---|-------------|-------------|-------------|
| C | 4.48852700  | -0.93069500 | 3.41067800  |
| C | 4.28860300  | -0.39813000 | 1.97796600  |
| C | 5.38539200  | 0.62863300  | 1.63639200  |
| C | -0.37477100 | 1.93307600  | 2.48644200  |
| C | -1.68420000 | 1.97318100  | 3.02293500  |
| C | -2.10951300 | 3.14156100  | 3.66277600  |
| C | -1.28283300 | 4.25131200  | 3.77209300  |
| C | -0.00003800 | 4.20071300  | 3.24330300  |
| C | 0.48024700  | 3.05382600  | 2.60483800  |
| C | 1.58286000  | -5.02610900 | -0.97061400 |
| C | 1.79963200  | -3.53980500 | -1.31478400 |
| C | 1.84917400  | -3.35116100 | -2.84188900 |
| C | 0.37514800  | 1.93915600  | -2.48304400 |
| C | -0.48044800 | 3.05959000  | -2.60025900 |
| C | -0.00085800 | 4.20720700  | -3.23797000 |
| C | 1.28178200  | 4.25876300  | -3.76704900 |
| C | 2.10904700  | 3.14931200  | -3.65880500 |
| C | 1.68443500  | 1.98026000  | -3.01977600 |
| C | -2.04805100 | 4.00993600  | -0.85003100 |
| C | -1.90325100 | 3.06024500  | -2.05395300 |
| C | -2.93511300 | 3.39946200  | -3.14529800 |
| C | -3.01604100 | -1.93401000 | -0.32871000 |
| C | -3.04207600 | -2.98385800 | 0.62475100  |
| C | -4.26346200 | -3.59886400 | 0.92119200  |
| C | -5.44091500 | -3.22710200 | 0.29093800  |
| C | -5.40766200 | -2.20809100 | -0.65134400 |
| C | -4.22379900 | -1.53801300 | -0.96680500 |
| C | 3.93585500  | 1.19246000  | -2.15432500 |
| C | 2.65890100  | 0.81157600  | -2.92512200 |
| C | 3.01138300  | 0.24947800  | -4.31562200 |
| C | -3.01250800 | 0.24209500  | 4.31698500  |
| C | -2.65855500 | 0.80449300  | 2.92697500  |
| C | -3.93470600 | 1.18602300  | 2.15514200  |
| C | -1.86096000 | -3.35866700 | 2.84781500  |
| C | -1.79847300 | -3.52853300 | 1.31910800  |
| C | -1.56327100 | -5.00802100 | 0.95827900  |
| C | -4.48824600 | -0.93151300 | -3.41517700 |
| C | -4.29154300 | -0.39919300 | -1.98197200 |
| C | -5.39204500 | 0.62380100  | -1.64090000 |
| C | 2.93465100  | 3.39624500  | 3.14980900  |
| C | 1.90305700  | 3.05573600  | 2.05861600  |
| C | 2.04690800  | 4.00534600  | 0.85448600  |
| H | 1.48030200  | -2.23884900 | 2.52863500  |
| H | 0.06322900  | -0.55233700 | 3.48235000  |
| H | -0.06679100 | -0.54318400 | -3.48325500 |
| H | -1.48558400 | -2.22947200 | -2.53178300 |
| H | 6.32910700  | -1.90537700 | 1.13414000  |
| H | 6.37826800  | -3.71553600 | -0.53944000 |
| H | 4.29041400  | -4.40126600 | -1.65298600 |
| H | 3.33528000  | 0.12864900  | 1.95014200  |
| H | 3.69440300  | -1.62417300 | 3.69586600  |
| H | 4.49301700  | -0.10654100 | 4.13050700  |

|   |             |             |             |
|---|-------------|-------------|-------------|
| H | 5.44172500  | -1.46075100 | 3.50142900  |
| H | 6.38726000  | 0.19647600  | 1.70696200  |
| H | 5.34455600  | 1.46668000  | 2.33726700  |
| H | 5.26281600  | 1.02343700  | 0.62551100  |
| H | -3.11104100 | 3.18442400  | 4.07637400  |
| H | -1.63609600 | 5.14977000  | 4.26616500  |
| H | 0.64406400  | 5.06844400  | 3.33146200  |
| H | 0.93205800  | -2.99235100 | -0.93959700 |
| H | 2.39528900  | -5.64568300 | -1.36000900 |
| H | 0.64997300  | -5.39045400 | -1.40962900 |
| H | 1.53505400  | -5.18224200 | 0.10924300  |
| H | 1.97213400  | -2.30181900 | -3.11529000 |
| H | 0.92704000  | -3.71677500 | -3.30385900 |
| H | 2.68189800  | -3.90812600 | -3.28106000 |
| H | -0.64540000 | 5.07470200  | -3.32533200 |
| H | 1.63453300  | 5.15773800  | -4.26054900 |
| H | 3.11040900  | 3.19296500  | -4.07274200 |
| H | -2.11654300 | 2.04989100  | -1.70296700 |
| H | -1.83864100 | 5.04570900  | -1.13441000 |
| H | -1.36423700 | 3.74212800  | -0.04111800 |
| H | -3.06733600 | 3.97376900  | -0.45375900 |
| H | -3.94843600 | 3.34248500  | -2.73852600 |
| H | -2.86598500 | 2.70632500  | -3.98781300 |
| H | -2.79643300 | 4.41196600  | -3.53498500 |
| H | -4.28640200 | -4.40108400 | 1.65037500  |
| H | -6.37383400 | -3.72568200 | 0.52954700  |
| H | -6.32773600 | -1.91523500 | -1.14396900 |
| H | 2.17439100  | 0.01297100  | -2.36038400 |
| H | 4.51741500  | 1.94768200  | -2.69078100 |
| H | 4.57234900  | 0.31465600  | -2.01453800 |
| H | 3.69336100  | 1.59675300  | -1.16898800 |
| H | 2.11689600  | -0.06031100 | -4.86271100 |
| H | 3.67238200  | -0.61698700 | -4.22240400 |
| H | 3.52677800  | 0.99681500  | -4.92583300 |
| H | -2.17370400 | 0.00596800  | 2.36246900  |
| H | -2.11861600 | -0.06825400 | 4.86474300  |
| H | -3.67387200 | -0.62400300 | 4.22290700  |
| H | -3.52815800 | 0.98937700  | 4.92703400  |
| H | -4.51648100 | 1.94121700  | 2.69142100  |
| H | -4.57131800 | 0.30847100  | 2.01440600  |
| H | -3.69119700 | 1.59064900  | 1.17019900  |
| H | -0.93394900 | -2.96712200 | 0.95771700  |
| H | -2.00017600 | -2.31436800 | 3.13254800  |
| H | -0.93691700 | -3.71711300 | 3.31153800  |
| H | -2.68848300 | -3.93210500 | 3.27536200  |
| H | -2.37410000 | -5.64004900 | 1.33081300  |
| H | -0.63146500 | -5.36918600 | 1.40222800  |
| H | -1.50292700 | -5.14939800 | -0.12294100 |
| H | -3.33999200 | 0.13071900  | -1.95271800 |
| H | -3.69172600 | -1.62239900 | -3.69998100 |
| H | -4.49452900 | -0.10695900 | -4.13453400 |
| H | -5.43970900 | -1.46443900 | -3.50730900 |

|   |             |            |             |
|---|-------------|------------|-------------|
| H | -6.39240500 | 0.18826900 | -1.71225400 |
| H | -5.35352500 | 1.46221600 | -2.34150700 |
| H | -5.27146900 | 1.01873700 | -0.62983500 |
| H | 2.11727000  | 2.04549800 | 1.70783200  |
| H | 2.79496000  | 4.40871200 | 3.53924100  |
| H | 3.94800900  | 3.34031400 | 2.74300500  |
| H | 2.86632700  | 2.70327300 | 3.99251900  |
| H | 1.36298100  | 3.73707300 | 0.04581800  |
| H | 3.06609000  | 3.96976300 | 0.45789000  |
| H | 1.83694700  | 5.04101800 | 1.13882000  |

## NCCN Spiro Bisperoxo Complex

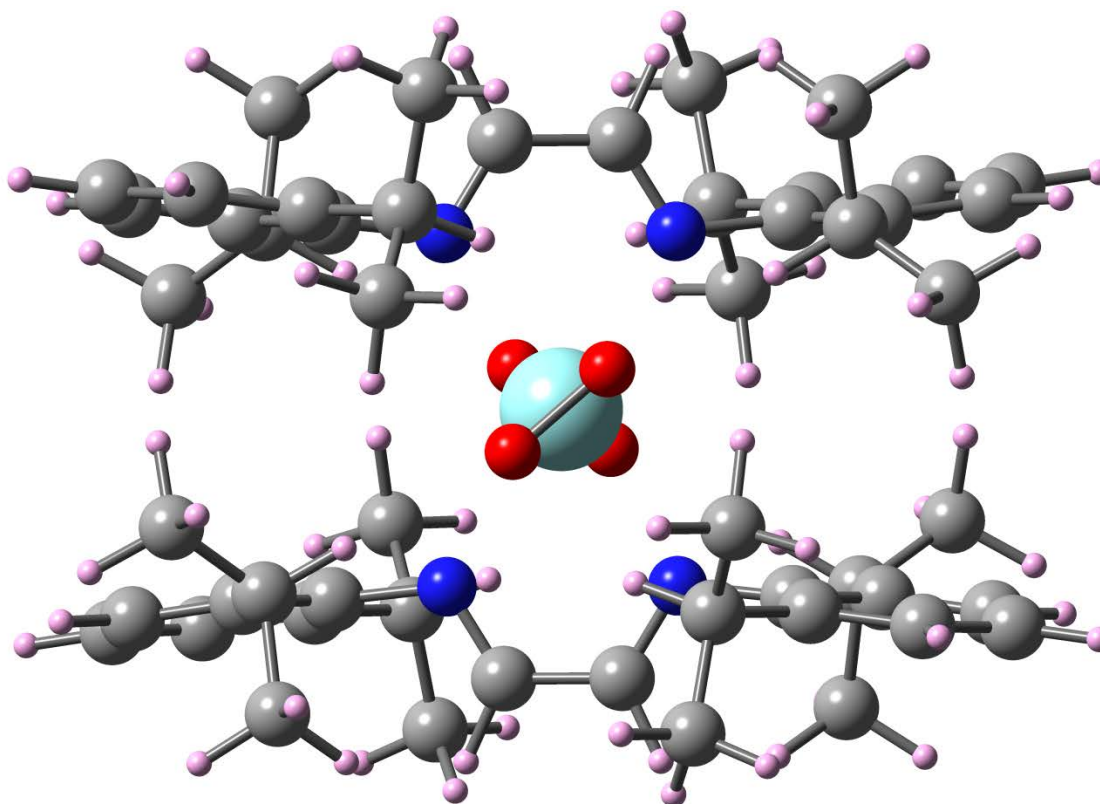

Fig. S180: NCCN Spiro Bisperoxo Complex

| SCF            |
|----------------|
| -2592.55635769 |

|    |             |             |             |
|----|-------------|-------------|-------------|
| Zr | -0.00190900 | -0.00006900 | -0.00035700 |
| O  | 0.55462300  | 0.44841300  | 1.94269000  |
| O  | -0.56215500 | -0.51376200 | 1.92529000  |
| O  | -0.56251400 | 0.51337000  | -1.92593500 |
| O  | 0.55466400  | -0.44834700 | -1.94342900 |
| N  | 1.35921000  | -2.07992300 | 0.34920300  |
| N  | -1.35911800 | -2.06794700 | -0.41325900 |
| N  | -1.35998300 | 2.06726100  | 0.41320800  |
| N  | 1.35834400  | 2.08049800  | -0.34934700 |
| C  | 0.69727900  | -3.15771700 | 0.18130900  |
| C  | -0.69832500 | -3.15066000 | -0.27670700 |
| C  | -0.69946600 | 3.15023900  | 0.27746200  |
| C  | 0.69613300  | 3.15797800  | -0.18057100 |
| C  | 2.71548000  | -2.23523900 | 0.83088500  |
| C  | 3.76304100  | -2.23489600 | -0.11217700 |
| C  | 5.06033600  | -2.43378900 | 0.36855400  |
| C  | 5.30640100  | -2.62227300 | 1.72446200  |
| C  | 4.25319200  | -2.60663800 | 2.62972500  |
| C  | 2.93252800  | -2.40860800 | 2.21168600  |

|   |             |             |             |
|---|-------------|-------------|-------------|
| C | 4.56666800  | -1.29812000 | -2.35133800 |
| C | 3.49123200  | -2.10613400 | -1.60863200 |
| C | 3.33632000  | -3.49783400 | -2.25667900 |
| C | -2.04545300 | -1.29731200 | -4.43862900 |
| C | -1.79796700 | -2.31315300 | -3.31029800 |
| C | -1.55488000 | -3.72257300 | -3.88648700 |
| C | -2.71449100 | -2.20544800 | -0.90316000 |
| C | -2.93252700 | -2.33138800 | -2.28908100 |
| C | -4.25451600 | -2.50776300 | -2.71255300 |
| C | -5.30758100 | -2.54921700 | -1.80784500 |
| C | -5.06008700 | -2.40921200 | -0.44638600 |
| C | -3.76163900 | -2.23234000 | 0.03969600  |
| C | 2.05370200  | -1.43449800 | 4.39128400  |
| C | 1.79720300  | -2.41280400 | 3.23221800  |
| C | 1.53945000  | -3.83679200 | 3.76401300  |
| C | -4.56655200 | -1.38990500 | 2.31757100  |
| C | -3.48564900 | -2.15594500 | 1.53923000  |
| C | -3.30915600 | -3.56784600 | 2.13609900  |
| C | -2.71551600 | 2.20404900  | 0.90288400  |
| C | -2.93395400 | 2.32746500  | 2.28897600  |
| C | -4.25605200 | 2.50308900  | 2.71242300  |
| C | -5.30887200 | 2.54622700  | 1.80752400  |
| C | -5.06100200 | 2.40879200  | 0.44587600  |
| C | -3.76242400 | 2.23284300  | -0.04020800 |
| C | -2.04789900 | 1.28873200  | 4.43660700  |
| C | -1.79976900 | 2.30695500  | 3.31056000  |
| C | -1.55668100 | 3.71511900  | 3.88980400  |
| C | 2.05248600  | 1.44177900  | -4.39281000 |
| C | 1.79595900  | 2.41785800  | -3.23188200 |
| C | 1.53778900  | 3.84277200  | -3.76100300 |
| C | 2.71456100  | 2.23668400  | -0.83098300 |
| C | 2.93144000  | 2.41210500  | -2.21155200 |
| C | 4.25200700  | 2.61111200  | -2.62942200 |
| C | 5.30530800  | 2.62565500  | -1.72424200 |
| C | 5.05942700  | 2.43502800  | -0.36860800 |
| C | 3.76222100  | 2.23514400  | 0.11196100  |
| C | -4.56644200 | 1.39484100  | -2.32001000 |
| C | -3.48611800 | 2.15985700  | -1.53985800 |
| C | -3.31048700 | 3.57319700  | -2.13355900 |
| C | 4.56618800  | 1.29399900  | 2.34914300  |
| C | 3.49068600  | 2.10358400  | 1.60822800  |
| C | 3.33604200  | 3.49402400  | 2.25904200  |
| H | 1.14737100  | -4.13367500 | 0.37211100  |
| H | -1.14925500 | -4.12010400 | -0.49635900 |
| H | -1.15068000 | 4.11942900  | 0.49765400  |
| H | 1.14593100  | 4.13418800  | -0.37077300 |
| H | 5.88915800  | -2.44714500 | -0.32857500 |
| H | 6.32106400  | -2.77802900 | 2.07455100  |
| H | 4.45634400  | -2.74853100 | 3.68493400  |
| H | 2.54577600  | -1.57300600 | -1.73796000 |
| H | -0.88710900 | -1.98119200 | -2.81072500 |
| H | 5.52874700  | -1.81911900 | -2.37568000 |

|   |             |             |             |
|---|-------------|-------------|-------------|
| H | 4.71944200  | -0.31834900 | -1.89595300 |
| H | 4.25755000  | -1.14159000 | -3.38802400 |
| H | 4.26130800  | -4.07554600 | -2.16297600 |
| H | 3.10284900  | -3.39817600 | -3.32064000 |
| H | 2.53583000  | -4.08099500 | -1.79328200 |
| H | -2.92766700 | -1.54439000 | -5.03773300 |
| H | -1.18256400 | -1.27988700 | -5.11043800 |
| H | -2.16204400 | -0.29450700 | -4.02587400 |
| H | -1.31855600 | -4.44922700 | -3.10276000 |
| H | -0.71765300 | -3.70489200 | -4.59064800 |
| H | -2.43478600 | -4.09455700 | -4.42117100 |
| H | -4.45871400 | -2.61242600 | -3.77192000 |
| H | -6.32311900 | -2.68749200 | -2.16269800 |
| H | -5.88839200 | -2.44347400 | 0.25049300  |
| H | 0.89036500  | -2.05656100 | 2.74202100  |
| H | -2.54644300 | -1.61519700 | 1.68309400  |
| H | 2.93193200  | -1.70923800 | 4.98428900  |
| H | 1.18964200  | -1.42644900 | 5.06188100  |
| H | 2.18274800  | -0.42130700 | 4.00890900  |
| H | 2.41401900  | -4.23303200 | 4.28990900  |
| H | 1.29959100  | -4.53661400 | 2.95737700  |
| H | 0.69981700  | -3.83330000 | 4.46540100  |
| H | -4.73159900 | -0.39430200 | 1.90255500  |
| H | -4.25394100 | -1.27105800 | 3.35820200  |
| H | -5.52283500 | -1.92200700 | 2.32576500  |
| H | -4.22857900 | -4.15268700 | 2.03151900  |
| H | -3.06624700 | -3.50253000 | 3.20059200  |
| H | -2.50681700 | -4.12591100 | 1.64600600  |
| H | -4.46053400 | 2.60577800  | 3.77192800  |
| H | -6.32450300 | 2.68387900  | 2.16235700  |
| H | -5.88911500 | 2.44447800  | -0.25116000 |
| H | -0.88877500 | 1.97587200  | 2.81066000  |
| H | 0.88929600  | 2.06053600  | -2.74215200 |
| H | -2.93035900 | 1.53462700  | 5.03584200  |
| H | -1.18532200 | 1.26971800  | 5.10877500  |
| H | -2.16444200 | 0.28683500  | 4.02161400  |
| H | -1.32016500 | 4.44343500  | 3.10767600  |
| H | -0.71958800 | 3.69588800  | 4.59408100  |
| H | -2.43666200 | 4.08602000  | 4.42511600  |
| H | 2.93044100  | 1.71793000  | -4.98556900 |
| H | 1.18823200  | 1.43465900  | -5.06316500 |
| H | 2.18200900  | 0.42793200  | -4.01234700 |
| H | 1.29795200  | 4.54105100  | -2.95302400 |
| H | 0.69800500  | 3.84040000  | -4.46221500 |
| H | 2.41216700  | 4.24016900  | -4.28634900 |
| H | 4.45501600  | 2.75467300  | -3.68443100 |
| H | 6.31990000  | 2.78216700  | -2.07420100 |
| H | 5.88832500  | 2.44744200  | 0.32844700  |
| H | -2.54652700 | 1.62009300  | -1.68484400 |
| H | 2.54522600  | 1.57025200  | 1.73670200  |
| H | -5.52307000 | 1.92633800  | -2.32710200 |
| H | -4.73089300 | 0.39820400  | -1.90724100 |

|   |             |            |             |
|---|-------------|------------|-------------|
| H | -4.25367000 | 1.27852800 | -3.36087800 |
| H | -3.06736800 | 3.51042200 | -3.19815600 |
| H | -2.50860400 | 4.13067200 | -1.64205700 |
| H | -4.23031700 | 4.15718000 | -2.02780000 |
| H | 4.71866500  | 0.31505600 | 1.89187000  |
| H | 4.25731100  | 1.13556200 | 3.38560900  |
| H | 5.52836300  | 1.81478500 | 2.37422100  |
| H | 2.53549800  | 4.07818000 | 1.79699800  |
| H | 4.26105700  | 4.07184600 | 2.16628300  |
| H | 3.10280600  | 3.39228800 | 3.32285800  |

**O<sub>2</sub> Triplet**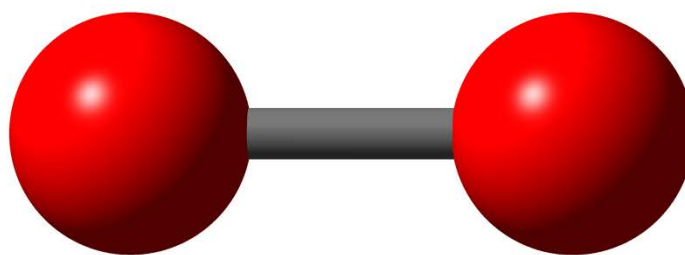Fig. S181: O<sub>2</sub> Triplet

|               |
|---------------|
| <b>SCF</b>    |
| -150.37041717 |

|   |            |            |             |
|---|------------|------------|-------------|
| O | 0.00000000 | 0.00000000 | 0.60287800  |
| O | 0.00000000 | 0.00000000 | -0.60287800 |
